# Supplementary material for: Testosterone therapy in hypogonadal men: a systematic review and network meta-analysis
Source: PubMed Central journal article supplement — BMJ Open. 2017 Nov 16;7(11):e015284. doi: 10.1136/bmjopen-2016-015284 (PMC5701987; doi:10.1136/bmjopen-2016-015284), 2017-11-16
Supplement: bmjopen-2016-015284.draft_revisions.pdf [file bmjopen-2016-015284.draft_revisions.pdf]

# BMJ Open

BMJ Open is committed to open peer review. As part of this commitment we make the peer review history of every article we publish publicly available.

When an article is published we post the peer reviewers' comments and the authors' responses online. We also post the versions of the paper that were used during peer review. These are the versions that the peer review comments apply to.

The versions of the paper that follow are the versions that were submitted during the peer review process. They are not the versions of record or the final published versions. They should not be cited or distributed as the published version of this manuscript.

BMJ Open is an open access journal and the full, final, typeset and author-corrected version of record of the manuscript is available on our site with no access controls, subscription charges or pay-per-view fees (<http://bmjopen.bmj.com>).

If you have any questions on BMJ Open's open peer review process please email [editorial.bmjopen@bmj.com](mailto:editorial.bmjopen@bmj.com)

# BMJ Open

## Testosterone therapy in hypogonadal men: a systematic review and network meta-analysis

|                                 |                                                                                                                                                                                                                                                                                                                                                                                                                                                                                                                                                                                                                                                                                                                                                                                          |
|---------------------------------|------------------------------------------------------------------------------------------------------------------------------------------------------------------------------------------------------------------------------------------------------------------------------------------------------------------------------------------------------------------------------------------------------------------------------------------------------------------------------------------------------------------------------------------------------------------------------------------------------------------------------------------------------------------------------------------------------------------------------------------------------------------------------------------|
| Journal:                        | <i>BMJ Open</i>                                                                                                                                                                                                                                                                                                                                                                                                                                                                                                                                                                                                                                                                                                                                                                          |
| Manuscript ID                   | bmjopen-2016-015284                                                                                                                                                                                                                                                                                                                                                                                                                                                                                                                                                                                                                                                                                                                                                                      |
| Article Type:                   | Research                                                                                                                                                                                                                                                                                                                                                                                                                                                                                                                                                                                                                                                                                                                                                                                 |
| Date Submitted by the Author:   | 22-Nov-2016                                                                                                                                                                                                                                                                                                                                                                                                                                                                                                                                                                                                                                                                                                                                                                              |
| Complete List of Authors:       | Elliott, Jesse; University of Ottawa Heart Institute, Kelly, Shannon; University of Ottawa, Department of Epidemiology and Community Medicine; Ottawa Hospital Research Institute, Medicine Millar, Adam; Mount Sinai Hospital, University of Toronto Peterson, Joan; Clinical Epidemiology Program, Ottawa Hospital Research Institute<br>Chen, Li; University of Ottawa Heart Institute, Johnston, Amy; Cardiovascular Research Methods Centre, University of Ottawa Heart Institute<br>Kotb, Ahmed; University of Ottawa Heart Institute, Skidmore, Becky; Independent Information Specialist<br>Mamdani, Muhammad; St Michael's Hospital, Li Ka Shing Knowledge Institute<br>Wells, George ; University of Ottawa Heart Institute, Department of Epidemiology and Community Medicine |
| <b>Primary Subject Heading</b>: | Epidemiology                                                                                                                                                                                                                                                                                                                                                                                                                                                                                                                                                                                                                                                                                                                                                                             |
| Secondary Subject Heading:      | Sexual health                                                                                                                                                                                                                                                                                                                                                                                                                                                                                                                                                                                                                                                                                                                                                                            |
| Keywords:                       | testosterone, cardiovascular-related adverse events, systematic review, network meta-analysis, benefits, harms                                                                                                                                                                                                                                                                                                                                                                                                                                                                                                                                                                                                                                                                           |
|                                 |                                                                                                                                                                                                                                                                                                                                                                                                                                                                                                                                                                                                                                                                                                                                                                                          |

SCHOLARONE™  
Manuscripts

## Testosterone therapy in hypogonadal men: a systematic review and network meta-analysis

Word count: 3185

Jesse Elliott, Shannon Kelly, Adam Millar, Joan Peterson, Li Chen, Amy Johnston, Ahmed Kotb, Becky Skidmore, Muhammad Mamdani, George A Wells

Jesse Elliott MSc,  
Cardiovascular Research Methods Centre, University of Ottawa Heart Institute, 40 Ruskin Street, Ottawa,  
Ontario, K1Y4W7

Shannon Kelly MSc,  
Cardiovascular Research Methods Centre, University of Ottawa Heart Institute,  
40 Ruskin Street, Ottawa, Ontario, K1Y4W7

Adam C. Millar MD MScCH  
Department of Medicine, Mount Sinai Hospital, University of Toronto, Toronto, Ontario

Joan Peterson BSc,  
Clinical Epidemiology Program, Ottawa Hospital Research Institute, 1053 Carling Avenue, Ottawa,  
Ontario, K1Y 4E9

Li Chen MSc,  
Cardiovascular Research Methods Centre, University of Ottawa Heart Institute, 40 Ruskin Street, Ottawa,  
Ontario, K1Y4W7

Amy Johnston MSc,  
Cardiovascular Research Methods Centre, University of Ottawa Heart Institute,  
40 Ruskin Street, Ottawa, Ontario K1Y4W7

Ahmed Kotb MSc,  
Royal College of Surgeons in Ireland, 123 St. Stephen's Green, Dublin, Ireland

Becky Skidmore MLS,  
Independent Information Specialist, Ottawa, Ontario, K1T 3Z2

Muhammad Mamdani PharmD,  
Li Ka Shing Knowledge Institute, St. Michael's Hospital; Toronto, Ontario M5B1W8

George A. Wells PhD, Cardiovascular Research Methods Centre, University of Ottawa Heart Institute, 40  
Ruskin Street, Ottawa, Ontario, K1Y4W7

**Correspondence to:** GA Wells, gawells@ottawaheart.ca

1  
2  
3  
4  
5 **Funding:** This study was support in part by the Ontario Drug Policy Research Network, which is funded  
6  
7 by a grant from the Ontario Ministry of Health and Long-Term Care Health System Research Fund.  
8

9  
10 **Role of the funding source:** The funding source had no role in the design and conduct of the study;  
11  
12 collection, management, analysis, and interpretation of the data; preparation, review, or approval of the  
13  
14 manuscript; and decision to submit the manuscript for publication.  
15

16  
17 **Transparency:** The guarantor affirms that the manuscript is an honest, accurate, and transparent account  
18  
19 of the study being reported; that no important aspects of the study have been omitted; and that any  
20  
21 discrepancies from the study as planned and registered have been explained.  
22  
23

24 **Ethical approval:** not required.  
25

26  
27 **Data sharing:** No additional data available.  
28  
29

30 **Registration:** PROSPERO number: CRD42014009963  
31  
32

33 **Competing interest statement:** Dr. Mamdani reports receiving honoraria for serving on Advisory  
34  
35 Boards for Astra Zeneca, Bristol-Myers Squibb, Eli Lilly and Company, GlaxoSmithKline, Hoffman La  
36  
37 Roche, Novartis, Novo Nordisk, and Pfizer, outside the submitted work. Ms. Skidmore is a paid  
38  
39 information consultant/contractor to the Ottawa Hospital Heart Institute. No conflicts declared by any  
40  
41 other author.  
42  
43  
44

45 **Contributors:** JE, SK, MM, and GW designed the study. BS developed and executed the search strategy.  
46  
47 JE, SK, JP, AJ, and AK selected studies for inclusion and extracted data. JE, AK, and LC analyzed the  
48  
49 data. JE, SK, LC, AM, and GW interpreted the data. JE wrote the first draft of the manuscript, which was  
50  
51 critically revised for intellectual content by all authors. All authors approved the final version submitted  
52  
53 for publication and agree to be accountable for all aspects of the study.  
54  
55  
56  
57  
58  
59  
60

1  
2  
3  
4  
5  
6  
7  
8  
9  
10  
11  
12  
13  
14  
15  
16  
17  
18  
19  
20  
21  
22  
23  
24  
25  
26  
27  
28  
29  
30  
31  
32  
33  
34  
35  
36  
37  
38  
39  
40  
41  
42  
43  
44  
45  
46  
47  
48  
49  
50  
51  
52  
53  
54  
55  
56  
57  
58  
59  
60

**Keywords:** testosterone, benefits, depression, quality of life, erectile function, libido, harms, cardiovascular-related adverse events, systematic review, network meta-analysis

For peer review only

## ABSTRACT

**Objective:** To assess the relative effects of individual testosterone products, most of which have never been compared head-to-head.

**Design:** Systematic review and network meta-analysis

**Data sources:** MEDLINE, Embase, Cochrane CENTRAL, and grey literature (up to October 13, 2015).

**Eligibility criteria for selecting studies:** Randomized controlled trials (RCTs) and non-randomized studies were selected if they involved adult hypogonadal men who received any testosterone product for at least 3 months. Eligible comparators were placebo, another testosterone product, or the same product at a different dose.

**Data extraction:** Data were extracted by one reviewer and checked by a second. The primary outcomes were benefits (improvements in quality of life, depression, libido, erectile function, activities of daily living, testosterone levels) and harms (cardiovascular death, myocardial infarction, stroke, prostate cancer, heart disease, diabetes, serious adverse events, withdrawals due to adverse events, erythrocytosis). Data were pooled for RCTs via meta-analysis and network meta-analysis.

**Results:** 73 RCTs and 41 NRS were included. Most were at high or unclear risk of bias. When compared as a class against placebo, testosterone improved quality of life and libido with no significant effect on depression or erectile function. Via network meta-analysis, we found that few individual products had a significant effect compared with placebo, and there were few significant differences among the treatments for any beneficial outcome. We found no increased risk of any harm, including cardiovascular-related adverse events, with the exception of withdrawals due to adverse events; however, most included trials were of short duration and at high risk of bias.

1  
2  
3  
4 **Conclusion:** Despite a class effect of improving quality of life and libido, major improvements were not  
5  
6 observed for any individual product. We observed no statistically significant increase in any major harm;  
7  
8 however, longer-term high-quality trials are needed to fully assess the risk of adverse outcomes.  
9

10  
11 **Registration:** PROSPERO CRD42014009963  
12  
13

## 14 15 16 17 **Article Summary**

### 18 19 **Strengths and limitations**

- 20  
21 • We performed a comprehensive systematic review of the published and grey literature to identify  
22  
23 randomized and non-randomized studies involving adult men with low testosterone levels  
24
- 25  
26 • Although there is no universally agreed on level for the diagnosis of “low” testosterone, we included  
27  
28 only studies that enrolled men with total testosterone  $\leq 12$  nmol or free testosterone  $\leq 225$  pmol/L,  
29  
30 consistent with recent guidelines.  
31
- 32  
33 • Data in non-randomized studies were poorly reported and were not suitable to pooling via meta-  
34  
35 analysis.  
36
- 37  
38 • The included studies were generally at high or unclear risk of bias, and most studies had a relatively  
39  
40 short treatment duration.
- 41  
42 • Long-term high-quality studies are needed to more fully assess the risk of rare adverse events.  
43  
44  
45  
46  
47  
48  
49  
50  
51  
52  
53  
54  
55  
56  
57  
58  
59  
60

## Introduction

Testosterone deficiency has well-recognized negative effects on male sexuality and quality of life.<sup>1</sup> Recent clinical practice guidelines recommend testosterone therapy for adult men with low testosterone levels (hypogonadal men) with the goal of improving symptoms and elevating testosterone levels into the mid-normal range for young men.<sup>2</sup> However, two large observational studies have reported an increased risk of cardiovascular events with testosterone use,<sup>3,4</sup> and the US Food and Drug Administration (FDA) and Health Canada both have warned of a potential increased risk of cardiovascular events among men using testosterone products.<sup>5,6</sup>

Previous meta-analyses have reported positive effects of testosterone replacement therapy (TRT), compared with placebo, on quality of life,<sup>7</sup> depression,<sup>8,9</sup> and some aspects of sexual function.<sup>10</sup> However, the results of individual trials have been mixed, and there is variation in testosterone formulations and dose.<sup>11</sup> Similarly, previous meta-analyses of potential harms related to TRT have reported contradictory findings.<sup>12-16</sup> A 2013 meta-analysis reported an increased risk of cardiovascular-related events in a mixed population of hypogonadal and eugonadal men<sup>15</sup>; however, others have found no increased risk of cardiovascular outcomes, including myocardial infarction, stroke, or cardiovascular death.<sup>12-14,16</sup>

Because each TRT product has a different formulation and many different dosing strategies exist,<sup>17</sup> it may not be appropriate to group together all testosterone products, as in traditional meta-analyses. In this study, we performed a systematic review to identify randomized and non-randomized studies (NRS) involving hypogonadal men, and we used network meta-analysis to compare the relative benefits and harms of each product.

## Methods

This review was registered *a priori* (CRD42014009963) and followed the Cochrane handbook<sup>18</sup> and the PRISMA for Network Meta-Analysis checklist.<sup>19</sup> Our review included randomized controlled trials (RCTs) and NRS involving men with low testosterone taking any form of testosterone replacement



1  
2  
3  
4 therapy compared to placebo, another testosterone product, or the same product at a different dose. We  
5  
6 did not exclude studies on the basis of outcomes reported in the individual studies.  
7  
8

9  
10 **Patient involvement:** No patients were involved in setting the research question or in developing plans  
11  
12 for design, or implementation of the study. A patient representative was involved in selecting the  
13  
14 outcome measures, and patient groups were given the opportunity to comment on the study protocol. No  
15  
16 patients were asked to advise on the interpretation or writing up of results. There are no plans to  
17  
18 disseminate the results of the research to study participants or the relevant patient community.  
19

20  
21 **Search strategy:** We searched Ovid MEDLINE, Ovid MEDLINE In-Process & Other Non-Indexed  
22  
23 Citations, and Embase Classic+Embase, and Cochrane CENTRAL (up to June 8, 2014; eAppendix 1);  
24  
25 grey literature were searched according to CADTH's Grey Matters Light.<sup>20</sup> The search was updated on  
26  
27 October 13, 2015.  
28

29  
30 **Study selection:** We included placebo- and active-controlled RCTs and NRS involving adult men ( $\geq 18$   
31  
32 yr) with low testosterone (total testosterone  $\leq 12$  nmol/L or free testosterone  $< 225$  pmol/L) taking a  
33  
34 testosterone product. We excluded studies that artificially suppressed endogenous testosterone, involved  
35  
36 testosterone precursors, or had less than 10 participants. We included studies with a treatment duration of  
37  
38 12 weeks or longer, as follow-up is generally recommended for this time point.<sup>2,21</sup> Cross-over trials were  
39  
40 included if the initial period was at least 12 weeks. Titles and abstracts were screened in duplicate (JE,  
41  
42 JP), and the full-text of any potentially relevant record was evaluated (JE, JP, AJ). Disagreements were  
43  
44 resolved by consensus.  
45  
46

47  
48 **Data extraction and risk of bias:** Data were extracted by one reviewer using piloted standardized  
49  
50 abstraction forms (Distiller SR) and checked by a second reviewer (JE, JP, AJ, AK). Data from RCTs  
51  
52 were included for benefits outcomes, and data from RCTs and NRS were included for harms outcomes.  
53  
54 First-period data were extracted from cross-over trials. Risk of bias was assessed by two reviewers using  
55  
56  
57  
58  
59  
60

1  
2  
3  
4 the Cochrane Collaboration's risk of bias tool for RCTs or SIGN50 for cohort studies. Disagreements  
5  
6 were resolved by discussion. Publication bias was assessed by visual inspection of funnel plots.  
7  
8

9  
10 **Outcomes:** Outcomes were grouped as benefits (quality of life, depression, libido, erectile function, and  
11  
12 activities of daily living, testosterone level at 3 mo, 6 mo, end of study) and harms (cardiovascular death,  
13  
14 myocardial infarction, stroke, prostate cancer, diabetes, heart disease, serious adverse events, withdrawals  
15  
16 due to adverse events, erythrocytosis). We included data for quality of life, depression, erectile function,  
17  
18 and libido that had been measured using a validated scale (a complete list of scales is available from the  
19  
20 corresponding author).  
21  
22

23  
24 **Data analysis:** The results of the included NRS are summarized narratively. Meta-analysis and network  
25  
26 meta-analysis involving data from RCTs were performed as described below. We performed meta-  
27  
28 analysis using RevMan (v.5.3; Cochrane Collaboration) and Bayesian network meta-analysis using  
29  
30 WinBUGS (v.1.4.3; MRC Biostatistics Unit). The number randomized was used as the denominator for  
31  
32 benefits outcomes, and the number who received treatment was used for harms. Two trials<sup>22,23</sup> were  
33  
34 removed from the analyses because the data from these trials were outliers for each outcome and each had  
35  
36 a considerable effect on heterogeneity. For example, removal of the trial by Cavallini and colleagues  
37  
38 reduced the  $I^2$  value from 81% to 11% for the outcome erectile function. In an exploratory analysis, we  
39  
40 removed trials enrolling men with major comorbidities (i.e., HIV/AIDS, osteoporosis, metabolic  
41  
42 syndrome, type 2 diabetes, angina, Alzheimer's disease, heart failure, end-stage renal disease).  
43  
44

45  
46 In the network meta-analysis, we used a binomial likelihood model for dichotomous outcomes and a  
47  
48 normal likelihood model for continuous outcomes, allowing for the inclusion of multi-arm trials.<sup>24</sup>  
49

50 Network meta-analyses included all trials that reported each outcome with no restriction based on  
51  
52 comorbidities. Each dose of an individual testosterone product was included as a separate node. A  
53  
54 continuity correction was applied to adjust zero events for harm outcomes. Assessment of model fit and  
55  
56 choice of model (fixed v. random effects) was based on assessment of the deviance information criterion  
57  
58  
59  
60

1  
2  
3  
4 and comparison of residual deviance to the number of unconstrained data points.<sup>24</sup> Results are reported  
5  
6 for the random-effects model. We derived point estimates and 95% credible intervals (CrIs) using the  
7  
8 Markov Chain Monte Carlo method. Mean differences, standardized mean differences with standard  
9  
10 deviations (SDs) or odds ratios (ORs) with 95% CrIs are reported for continuous or dichotomous  
11  
12 outcomes. Vague priors (e.g.,  $N[0, 100^2]$ ) were assigned for basic parameters throughout.<sup>24</sup> To ensure  
13  
14 model convergence, trace plots and Brooks-Gelman-Rubin statistics were assessed.<sup>25</sup> Three chains were  
15  
16 fit for each analysis with at least 20,000 iterations and a burn-in of at least 20,000 iterations.  
17  
18  
19 Inconsistency was assessed where possible by comparing the deviance, between-study variance, and  
20  
21 deviance information criterion statistics of the consistency and inconsistency models.<sup>26</sup> The posterior  
22  
23 mean deviance of the individual data points in the inconsistency model was plotted against the posterior  
24  
25 mean deviance in the consistency model.<sup>26</sup> All network diagrams were constructed using NodeXL.  
26  
27  
28

29 **Role of the funding source:** The funder had no role in study design, data collection, analysis,  
30  
31 interpretation, or writing. All authors had full access to the study data, and the corresponding author had  
32  
33 final responsibility for the decision to submit for publication.  
34  
35

## 36 **Results**

### 37 **Search results and study characteristics**

38  
39 We identified 72 RCTs and 41 NRS published between 1997 and 2014 (Figure 1, eAppendix 2). Of these,  
40  
41 57 RCTs and 11 NRS reported an outcome of interest (eTable1,2). The median duration of RCTs was 6  
42  
43 months (range: 3–36 mo), with mean participant age ranging between 30 and 78 years (eTable1). Most  
44  
45 RCTs were placebo controlled (84%), with 2 treatment groups (86%). Of the included NRS, 6 were  
46  
47 retrospective and 5 were prospective cohorts, with a duration between 2 and 36 months (eTable2). Few  
48  
49 RCTs or NRS were at low risk of bias, primarily because of a lack of details about randomization  
50  
51 procedures, allocation concealment, and analysis populations (eTable3,4).  
52  
53  
54  
55  
56  
57  
58  
59  
60

## Consistency

Comparison of the consistency and inconsistency models for libido and total testosterone levels did not show evidence of inconsistency (eAppendix5). Consistency could not be evaluated for quality of life, depression, or erectile function because of a lack of closed loops.

## Benefits

**Quality of life:** In total, 18 placebo-controlled RCTs involving 2698 participants assessed quality of life. Compared with placebo, treatment with any TRT significantly improved quality of life (standardized mean difference [SMD]  $-0.23$ , 95%CI  $-0.38, -0.09$ ) with substantial heterogeneity ( $I^2 = 62\%$ ; Figure 2A). To explore this heterogeneity, we excluded RCTs that involved men with major comorbidities. This reduced heterogeneity into the moderate range ( $I^2 = 45\%$ ), with little effect on the point estimate (SMD  $-0.43$ , 95%CI  $-0.76, -0.09$ ; Figure 2B).

The evidence network for quality of life comprised 20 RCTs, representing 14 treatments in addition to placebo ( $n = 2698$ ). Figure 3 shows the evidence network for quality of life; networks for the other outcomes are shown in eAppendix4. Compared to placebo, no treatment significantly improved quality of life, and there were no significant differences among the treatments (Table 1). The results were consistent when only studies with no major comorbidities were included (data not shown).

**Depression:** 11 trials involving 842 participants randomized to 9 treatments evaluated depression. Compared with placebo, treatment with any TRT had no significant effect on depression (SMD  $-0.18$ , 95%CI  $-0.49, 0.13$ ); however, heterogeneity was substantial ( $I^2 = 73\%$ ) (eFigure2A). Removal of trials involving men with major comorbidities did not resolve this heterogeneity ( $I^2 = 81\%$ ; SMD  $-0.35$ , 95%CI  $-0.95, 0.25$ ) (eFigure2B).

In the network meta-analysis, intramuscular testosterone enanthate (200 mg/2wk) was significantly better than placebo at improving symptoms of depression (eTable 5). Among the treatments, intramuscular

1  
2  
3  
4 testosterone enanthate (200 mg/2wk) was significantly better than intramuscular testosterone enanthate  
5 administered as 125 mg/wk and Sustanon (100 mg/2 wk). When trials involving men with major  
6  
7 comorbidities were removed, there were no significant differences compared with placebo or among the  
8  
9 treatments (data not shown).  
10  
11

12  
13  
14 **Libido:** 9 trials involving 1546 patients randomized to 7 treatments investigated libido. Compared with  
15 placebo, testosterone significantly improved libido (SMD 0.17, 95%CI 0.01,0.34;  $I^2 = 34%$ ) (eFigure3A).  
16  
17 Removal of trials involving men with major comorbidities increased heterogeneity, and the point estimate  
18  
19 was no longer significant (SMD 0.04, 95%CI -0.28,0.36) (eFigure3B).  
20  
21

22  
23 In the network meta-analysis, 1% gel (100 mg/d) was significantly better than placebo at improving  
24  
25 libido. Among the treatments, 1% gel (100 mg/d) was significantly better than patch (5 mg/d) and oral  
26  
27 testosterone undecanoate (160 mg/d). Oral testosterone undecanoate at 120 mg/d and intramuscular  
28  
29 testosterone undecanoate (1000 mg/12 wk) were both significantly better than oral testosterone  
30  
31 undecanoate at 160 mg/d (eTable6)  
32  
33

34  
35 **Erectile function:** 11 trials involving 1226 patients randomized to 5 treatments evaluated erectile  
36  
37 function. Compared with placebo, testosterone had no significant effect on erectile function (SMD 0.15,  
38  
39 95%CI -0.00,0.31), with moderate heterogeneity ( $I^2 = 74%$ ; eFigure4A). Removing trials involving men  
40  
41 with major comorbidities reduced heterogeneity ( $I^2 = 11%$ ), with little change to the point estimate (SMD  
42  
43 0.19, 95%CI -0.03,0.40;eFigure4C).  
44  
45

46  
47 In the network meta-analysis, there were no significant differences in erectile function for any individual  
48  
49 testosterone product compared with placebo or among the products (eTable7). Removal of trials involving  
50  
51 major comorbidities did not alter the results (data not shown).  
52  
53

#### 54 **Testosterone levels**

55  
56  
57  
58  
59  
60

1  
2  
3  
4 In total, 23 and 19 RCTs reported T levels after 3 or 6 months of treatment, respectively. End of treatment  
5 values were reported in 47 RCTs. After 3 or 6 months of treatment, about half of the treatments in each  
6 network were associated with significantly higher total testosterone levels compared with placebo (3 mo:  
7 6/15; 6 mo: 8/17) (eTables 8,9). By the end of treatment (12 wk to 36 mo), most products were associated  
8 with total testosterone above 12 nmol/L (20/25 testosterone therapies), and 11 of 25 treatments had  
9 significantly higher levels relative to placebo (eTable10). Intramuscular testosterone enanthate was  
10 associated with significantly higher testosterone levels compared with most other products at the end of  
11 treatment.  
12  
13  
14  
15  
16  
17  
18  
19  
20  
21

## 22 Harms

23 **Cardiovascular death:** 8 RCTs reported the occurrence of cardiovascular death during the treatment  
24 period, while an additional 7 trials reported no CV deaths. Compared with placebo via pair wise meta-  
25 analysis, there was no significant difference between groups in the risk of cardiovascular death (OR 2.49,  
26 95% CI 0.75,8.21;  $I^2 = 10%$ ) (eFigure5). In the network meta-analysis, there was no significant difference  
27 in the odds of cardiovascular death between any testosterone therapy and placebo or among the therapies  
28 (eTable11).  
29  
30  
31  
32  
33  
34  
35  
36  
37

38 **Other adverse events:** Compared with placebo via meta-analysis, there were no increased odds of any  
39 harm outcome associated with the use of testosterone therapy with the exception of withdrawals due to  
40 adverse events (eFigures6-9). In the network meta-analysis, there was no difference between any  
41 testosterone therapy and placebo or among the therapies for any harm outcome, with the exception of  
42 withdrawals due to adverse events (eTables12-15). Use of 1.62% testosterone gel was associated with an  
43 increased odds of withdrawal compared with placebo and many of the other testosterone products  
44 (eTable15).  
45  
46  
47  
48  
49  
50  
51  
52  
53  
54  
55  
56  
57  
58  
59  
60

## Nonrandomized studies

The reporting of harms was generally poor, primarily because of a lack of transparency around the number of patients assigned to each group, the number of events per group, and the type or dose of testosterone product (eTable16). In the largest NRS,<sup>3</sup> among men who had undergone angiography, those who used TRT had a higher risk of an adverse cardiovascular event (HR 1.37, 95%CI 1.21,1.56). Two prospective NRS each reported one myocardial infarction,<sup>27,28</sup> with the occurrence of one in the testosterone group and one in the control group. Stroke was reported by one prospective NRS,<sup>27</sup> with one stroke reported in the testosterone group (n = 26) and one in the control group (n = 23).

Prostate cancer was reported by 5 NRS.<sup>29-33</sup> One cohort study<sup>33</sup> found no increased risk of prostate cancer with testosterone treatment (OR 0.85, 95%CI 0.34,2.16). Rhoden and colleagues<sup>30</sup> reported 1 case of prostate cancer among men using IM testosterone (n = 33) and none among users of 1% gel (n = 25); however, the dose gel and the type of IM testosterone was not reported. The reporting of outcomes and treatment group in the remaining studies was poor: either the group assignment of the men who experienced prostate cancer or the number of men in each treatment group was not reported in each (eTable16).<sup>29,31,32</sup>

## DISCUSSION

Despite more than 70 years of clinical use, testosterone therapy remains a controversial area of medicine. Part of the controversy may be a result of different actions of the various testosterone preparations. In an attempt to clarify the benefits and harms of testosterone products, we used traditional pair-wise meta-analysis combined with network meta-analysis, which allows the relative comparison of products that have not been compared in head-to-head trials. Consistent with most previous meta-analyses,<sup>7,10</sup> we found that use of any testosterone product improved quality of life and libido, with no significant effect on erectile function. In contrast with previous reviews, we found no significant effect of testosterone on depression; however, previous meta-analyses have included trials of all durations<sup>8</sup> while we included only

1  
2  
3  
4 trials with a treatment duration of 12 weeks or longer. A more favourable effect of testosterone on  
5 depression in short-term trials (less than 12 weeks) compared with longer trials has been reported.<sup>8</sup>  
6  
7

8  
9  
10 In the head-to-head comparison of testosterone products via network meta-analysis, we found no  
11 significant differences among products in effect on quality of life or erectile function. We found that  
12 intramuscular enanthate at 200 mg/2wk was effective at improving symptoms of depression compared to  
13 more frequent administration (125 mg/wk) and to Sustanon (100 mg/2 wk), a blend of testosterone esters  
14 administered intramuscularly. For libido, testosterone gel (1%, 100 mg/d) was significantly better than  
15 testosterone patch (5 mg/d) and oral testosterone undecanoate, and oral testosterone undecanoate at 120  
16 mg/d and intramuscular testosterone undecanoate (1000 mg/12 wk) were both significantly better than  
17 oral testosterone undecanoate at 160 mg/d. The finding that a lower dose of oral testosterone undecanoate  
18 was more effective than a higher dose was unexpected and requires further investigation.  
19  
20  
21  
22  
23  
24  
25  
26  
27  
28

29  
30 The FDA and Health Canada have both issued alerts about the potential for cardiovascular-related adverse  
31 events among men using testosterone products, based in part on findings from cohort studies,<sup>3,4</sup> the  
32 Testosterone in Older Men with Mobility Limitations (TOM) trial,<sup>34</sup> and one meta-analysis.<sup>15</sup> However,  
33 Xu and colleagues<sup>15</sup> have been criticized for use of a fixed-effects model, and subsequent reanalysis of  
34 their data using a random-effects model found no significant increase in risk of cardiovascular events.<sup>35</sup>  
35 Our findings are consistent with previous meta-analyses that have found no increased risk of  
36 cardiovascular events compared with placebo.<sup>12-14,16,35,36</sup> Our study extends previous findings by showing  
37 no increased risk of any cardiovascular adverse event associated with any individual testosterone product.  
38  
39  
40  
41  
42  
43  
44  
45  
46  
47

48 Although we had intended to analyze the effects of individual testosterone products among men aged 65  
49 years and older, data were limited because most RCTs included a wide age range. The Testosterone  
50 Trials<sup>37,38</sup> were designed to address the lack of data among elderly men. After one year of treatment with  
51 1% testosterone gel, improved sexual activity and desire but not erectile function was reported by men  
52 with low sexual function at baseline,<sup>37</sup> with no apparent increase in the risk of adverse cardiovascular  
53  
54  
55  
56  
57  
58  
59  
60



1  
2  
3  
4 events.<sup>38</sup> Although these findings are encouraging, the trials were not powered to detect adverse events,  
5  
6 and the results should not be generalized to different testosterone preparations.  
7  
8

### 9 10 **Strengths and limitations**

11  
12 The strengths of this study include a comprehensive search of the published and grey literature without  
13 language or date restrictions. In contrast with previous reviews, we included only studies that enrolled  
14 men with total testosterone  $\leq 12$  nmol/L or free testosterone  $\leq 225$  pmol/L. Although there is no  
15  
16  
17  
18  
19  
20  
21  
22  
23  
24  
25  
26  
27  
28  
29  
30  
31  
32  
33  
34  
35  
36  
37  
38  
39  
40  
41  
42  
43  
44  
45  
46  
47  
48  
49  
50  
51  
52  
53  
54  
55  
56  
57  
58  
59  
60

Our study had several limitations. First, the included studies used a variety of assays to determine  
testosterone levels and a variety of cut-off values for determining “low” testosterone. This has been noted  
by others.<sup>11,39</sup> The US Centers for Disease Control and Prevention’s Hormone Standardization Project<sup>40</sup>  
will help to resolve this issue. Second, the included RCTs and NRS were generally at unclear or high risk  
of bias, which may have had an impact on the reliability of subjective data. Third, the duration of  
treatment may have been too short to see an effect of testosterone therapy for all outcomes. In keeping  
with the recommendation to reassess symptoms after 3 months of TRT,<sup>21</sup> we included only studies with a  
treatment duration of 3 months or longer. The median duration of treatment was 6 months, but it is  
possible that some symptoms may take longer to resolve. Fourth, publication bias could not be assessed  
for all of the included outcomes because too few trials were included.<sup>18</sup> Based on a visual inspection of  
the funnel plots, we could not rule out publication bias for any outcome.

### 50 **Conclusions**

51  
52 To the best of our knowledge, this is the first study to compare the benefits and harms of individual  
53  
54  
55  
56  
57  
58  
59  
60

1  
2  
3  
4 trials. When considered as a group (any testosterone product compared to placebo), testosterone improved  
5  
6 quality of life and libido; however, at the individual product level, few had a significant effect on any  
7  
8 outcome. We found no increased risk of any major harm with any product; however, this must be viewed  
9  
10 in light of the high risk of bias of the included studies, the rare nature of serious harms, and short  
11  
12 treatment duration of most studies.  
13

14  
15  
16 **Acknowledgements:** We thank Wenfei Liu for assistance in screening records during the 2015 update of  
17  
18 the literature search.  
19  
20  
21  
22  
23  
24  
25  
26  
27  
28  
29  
30  
31  
32  
33  
34  
35  
36  
37  
38  
39  
40  
41  
42  
43  
44  
45  
46  
47  
48  
49  
50  
51  
52  
53  
54  
55  
56  
57  
58  
59  
60

## REFERENCES

1. Morgentaler A, Zitzmann M, Traish AM, et al. Fundamental Concepts Regarding Testosterone Deficiency and Treatment. *Mayo Clin Proc.* 2016;91(7):881-96.
2. Morales A, Bebb RA, Manjoo P, et al. Diagnosis and management of testosterone deficiency syndrome in men: Clinical practice guideline. *CMAJ.* 2015;187(18):1369-77.
3. Vigen R, O'Donnell CI, Baron AE, et al. Association of testosterone therapy with mortality, myocardial infarction, and stroke in men with low testosterone levels. *JAMA* 2013;310(17):1829.
4. Finkle WD, Greenland S, Ridgeway GK, et al. Increased risk of non-fatal myocardial infarction following testosterone therapy prescription in men. *PLOS One* 2014;9(1):1-7.
5. Health Canada. Summary safety review – testosterone replacement products cardiovascular risk 2014. [www.hc-sc.gc.ca/dhp-mps/medeff/reviews-examens/testosterone-eng.php](http://www.hc-sc.gc.ca/dhp-mps/medeff/reviews-examens/testosterone-eng.php). Accessed August 15, 2016.
6. FDA Drug Safety Communication: FDA cautions about using testosterone products for low testosterone due to aging; requires labeling change to inform of possible increased risk of heart attack and stroke with use. [www.fda.gov/downloads/Drugs/DrugSafety/UCM436270.pdf](http://www.fda.gov/downloads/Drugs/DrugSafety/UCM436270.pdf). Accessed August 15, 2015.
7. Guo C, Gu W, Liu M, et al. Efficacy and safety of testosterone replacement therapy in men with hypogonadism: A meta-analysis study of placebo-controlled trials. *Exp Ther Med.* 2016;11(3):853-63.
8. Amanatkar HR, Chibnall JT, Seo B-W, Manepalli JN, Grossberg GT. Impact of exogenous testosterone on mood: a systematic review and meta-analysis of randomized placebo-controlled trials. *Ann Clin Psychiatry.* 2014;26(1):19-32.
9. Zarrouf FA, Artz S, Griffith J, Sirbu C, Kommor M. Testosterone and depression: systematic review and meta-analysis. *J Psychiatr Pract.* 2009;15(4):289-305.
10. Bolona ER, Uruga M V, Haddad RM, et al. Testosterone use in men with sexual dysfunction: a systematic review and meta-analysis of randomized placebo-controlled trials. *Mayo Clin Proc.* 2007;82(1):20-8.
11. Isidori AM, Balercia G, Calogero AE, et al. Outcomes of androgen replacement therapy in adult male hypogonadism: Recommendations from the Italian Society of Endocrinology. *J Endocrinol Invest.* 2015;38(1):103-12.
12. Haddad RM, Kennedy CC, Caples SM, et al. Testosterone and cardiovascular risk in men: a systematic review and meta-analysis of randomized placebo-controlled trials. *Mayo Clin Proc.* 2007;82(1):29-39.
13. Fernandez-Balsells MM, Murad MH, Lane M, et al. Clinical review 1: Adverse effects of testosterone therapy in adult men: a systematic review and meta-analysis. *J Clin Endocrinol Metab.* 2010;95(6):2560-75.
14. Calof OM, Singh AB, Lee ML, et al. Adverse events associated with testosterone replacement in

- 1  
2  
3  
4  
5 middle-aged and older men: a meta-analysis of randomized, placebo-controlled trials. *J Gerontol*  
6 *A Biol Sci Med Sci.* 2005;60(11):1451-7.  
7  
8 15. Xu L, Freeman G, Cowling BJ, Schooling CM. Testosterone therapy and cardiovascular events  
9 among men: a systematic review and meta-analysis of placebo-controlled randomized trials. *BMC*  
10 *Med.* 2013;11:108.  
11  
12 16. Corona G, Maseroli E, Rastrelli G, et al. Cardiovascular risk associated with testosterone-boosting  
13 medications: a systematic review and meta-analysis. *Expert Opin Drug Saf.* 2014;13:1327-51.  
14  
15 17. McGill JJ, Shoskes DA, Sabanegh ES. Androgen deficiency in older men: indications, advantages,  
16 and pitfalls of testosterone replacement therapy. *Cleve Clin J Med.* 2012;79:797-806.  
17  
18 18. Higgins JP, Green S, eds. *Cochrane Handbook for Systematic Reviews of Interventions.*; 2008.  
19  
20 19. Hutton B, Salanti G, Caldwell DM, et al. The PRISMA extension statement for reporting of  
21 systematic reviews incorporating network meta-analyses of health care interventions: Checklist  
22 and explanations. *Ann Intern Med.* 2015;162(11):777-84.  
23  
24 20. CADTH. *Grey Matters Light.* Ottawa, ON.  
25 [www.cadth.ca/sites/default/files/is/cadth\\_Handout\\_greymatters\\_light\\_e.pdf](http://www.cadth.ca/sites/default/files/is/cadth_Handout_greymatters_light_e.pdf). Accessed August 15,  
26 2016.  
27  
28 21. Buvat J, Maggi M, Guay A, Torres LO. Testosterone deficiency in men: systematic review and  
29 standard operating procedures for diagnosis and treatment. *J Sex Med.* 2013;10(1):245-84.  
30  
31 22. Cavallini G, Caracciolo S, Vitali G, Modenini F, Biagiotti G. Carnitine versus androgen  
32 administration in the treatment of sexual dysfunction, depressed mood, and fatigue associated with  
33 male aging. *Urology.* 2004;63:641-6.  
34  
35 23. Zhang XW, Liu ZH, Hu XW, et al. Androgen replacement therapy improves psychological  
36 distress and health-related quality of life in late onset hypogonadism patients in Chinese  
37 population. *Chin Med J.* 2012;125:3806-10.  
38  
39 24. Dias S, Sutton A, Welton N, Ades A, Golfinopoulos V, Kyrgiou M. *NICE DSU Technical Support*  
40 *Document 2: Generalised Linear Modelling Framework for Pairwise and Network Meta-Analysis*  
41 *of Randomised Controlled Trials.* [www.nicesdu.org.uk/TSD6 Software.final.08.05.12.pdf](http://www.nicesdu.org.uk/TSD6%20Software.final.08.05.12.pdf).  
42 Accessed August 15, 2016.  
43  
44 25. Spiegelhalter D, Thomas A, Best N, Lunn D. *WinBUGS User Manual.*; 2003. [www.mrc-](http://www.mrc-bsu.cam.ac.uk/wp-content/uploads/manual14.pdf)  
45 [bsu.cam.ac.uk/wp-content/uploads/manual14.pdf](http://www.mrc-bsu.cam.ac.uk/wp-content/uploads/manual14.pdf). Accessed August 15, 2016.  
46  
47 26. Dias S, Welton N, Sutton A, Caldwell D, Lu G, Ades A. Evidence synthesis for decision making  
48 4: inconsistency in networks of evidence based on randomized controlled trials. *Med Decis Mak.*  
49 2013;33(5):641-56.  
50  
51 27. Hajjar RR, Kaiser FE, Morley JE. Outcomes of long-term testosterone replacement in older  
52 hypogonadal males: a retrospective analysis. *J Clin Endocrinol Metab.* 1997;82:3793-6.  
53  
54 28. Aversa A, Bruzziches R, Francomano D, et al. Effects of long-acting testosterone undecanoate on  
55 bone mineral density in middle-aged men with late-onset hypogonadism and metabolic syndrome:  
56 results from a 36 months controlled study. *Aging Male.* 2012;15:96-102.  
57  
58  
59  
60

- 1  
2  
3  
4  
5 29. Guay AT, Perez JB, Fitaihi WA, Vereb M. Testosterone treatment in hypogonadal men: prostate-specific antigen level and risk of prostate cancer. *Endocr Pract.* 2000;6:132-138.  
6  
7  
8 30. Rhoden EL, Morgentaler A. Influence of demographic factors and biochemical characteristics on the prostate-specific antigen (PSA) response to testosterone replacement therapy. *Int J Impot Res* 2006:201-5.  
9  
10  
11 31. Wang C, Cunningham G, Dobs A, et al. Long-term testosterone gel (AndroGel) treatment maintains beneficial effects on sexual function and mood, lean and fat mass, and bone mineral density in hypogonadal men. *J Clin Endocrinol Metab.* 2004;89:2085-98.  
12  
13  
14 32. Dean JD, Carnegie C, Rodzvilla J, Smith T. Long-term effects of testim(r) 1% testosterone gel in hypogonadal men. *Rev Urol* 2005;7:87-94.  
15  
16  
17 33. Shores MM, Smith NL, Forsberg CW, Anawalt BD, Matsumoto AM. Testosterone treatment and mortality in men with low testosterone levels. *J Clin Endocrinol Metab.* 2012;97:2050-8.  
18  
19  
20 34. Basaria S, Coviello AD, Travison TG, et al. Adverse events associated with testosterone administration. *N Engl J Med.* 2010;363:109-22.  
21  
22  
23 35. Borst SE, Shuster JJ, Zou B, et al. Cardiovascular risks and elevation of serum DHT vary by route of testosterone administration: a systematic review and meta-analysis. *BMC Med.* 2014;12:211.  
24  
25  
26 36. Albert SG, Morley JE. Testosterone therapy, association with age, initiation and mode of therapy with cardiovascular events: a systematic review. *Clin Endocrinol (Oxf).* 2016;85(3):436-443.  
27  
28  
29 37. Cunningham GR, Stephens-Shields AJ, Rosen RC, et al. Testosterone treatment and sexual function in older men with low testosterone levels. *J Clin Endocrinol Metab.* 2016;101(8):3096-104.  
30  
31  
32 38. Snyder PJ, Bhasin S, Cunningham GR, et al. Effects of Testosterone Treatment in Older Men. *N Engl J Med.* 2016;374(7):611-624.  
33  
34  
35 39. Millar AC, Lau ANC, Tomlinson G, et al. Predicting low testosterone in aging men: a systematic review. *CMAJ* 2016 Jun 20. cmaj.150262  
36  
37  
38 40. Standardizing Hormone Measurements. Atlanta: Centers for Disease Control and Prevention, National Center for Environmental Health Division of Laboratory Sciences; 2014.  
39  
40  
41 www.cdc.gov/labstandards/pdf/hs/HoSt\_Brochure.pdf. Accessed August 16, 2016.  
42  
43  
44  
45  
46  
47  
48  
49  
50  
51  
52  
53  
54  
55  
56  
57  
58  
59  
60

1  
2  
3  
4  
5 **Figure legends**  
6

7  
8 **Figure 1: PRISMA flow diagram showing selection of studies.** The number of studies identified in the  
9  
10 October 2015 update are noted in parentheses.

11  
12  
13 **Figure 2: Meta-analysis of the effect of testosterone on quality of life.** Before (A) and after (B)  
14  
15 removal of trials involving men with major comorbidities.  
16

17  
18 **Figure 3: Evidence network for quality of life.** The size of each circle (node) is proportional to the  
19  
20 number of randomly assigned patients and indicates sample size. The number of randomized controlled  
21  
22 trials that contributed to each direct comparison is indicated on each line. IM = intramuscular injection,  
23  
24 TC = testosterone cypionate, TE = testosterone enanthate, TU = testosterone undecanoate.  
25  
26  
27  
28  
29  
30  
31  
32  
33  
34  
35  
36  
37  
38  
39  
40  
41  
42  
43  
44  
45  
46  
47  
48  
49  
50  
51  
52  
53  
54  
55  
56  
57  
58  
59  
60

1  
2  
3  
4  
5  
6  
7  
8  
9  
10  
11  
12  
13  
14  
15  
16  
17  
18  
19  
20  
21  
22  
23  
24  
25  
26  
27  
28  
29  
30  
31  
32  
33  
34  
35  
36  
37  
38  
39  
40  
41  
42  
43  
44  
45  
46  
47  
48  
49

Tables

Table 1: Quality of life – Indirect comparison of testosterone products

|                          | Standardized mean difference (SD) |               |                |                 |                 |                  |                 |                   |                      |                    |                    |                    |                          |                            |
|--------------------------|-----------------------------------|---------------|----------------|-----------------|-----------------|------------------|-----------------|-------------------|----------------------|--------------------|--------------------|--------------------|--------------------------|----------------------------|
|                          | Placebo                           | Patch, 5 mg/d | Gel 1%, 5 mg/d | Gel 1%, 50 mg/d | Gel 1%, 75 mg/d | Gel 1%, 100 mg/d | Gel 2%, 60 mg/d | Oral TU, 160 mg/d | IM TU, 1000 mg/12 wk | IM TE, 250 mg/3 wk | IM TE, 250 mg/4 wk | IM TC, 200 mg/4 wk | IM Sustanon, 100 mg/2 wk | IM Durateston, 250 mg/4 wk |
| Patch, 5 mg/d            | -0.80 (0.64)                      | —             |                |                 |                 |                  |                 |                   |                      |                    |                    |                    |                          |                            |
| Gel 1%, 5 mg/d           | -0.36 (0.86)                      | 0.44 (1.08)   | —              |                 |                 |                  |                 |                   |                      |                    |                    |                    |                          |                            |
| Gel 1%, 50 mg/d          | -0.19 (0.51)                      | 0.61 (0.82)   | 0.17 (1.00)    | —               |                 |                  |                 |                   |                      |                    |                    |                    |                          |                            |
| Gel 1%, 75 mg/d          | 0.25 (0.91)                       | 1.06 (1.12)   | 0.61 (1.25)    | 0.44 (1.04)     | —               |                  |                 |                   |                      |                    |                    |                    |                          |                            |
| Gel 1%, 100 mg/d         | -0.04 (0.86)                      | 0.76 (1.06)   | 0.32 (1.21)    | 0.15 (0.99)     | -0.29 (1.26)    | —                |                 |                   |                      |                    |                    |                    |                          |                            |
| Gel 2%, 60 mg/d          | -0.13 (0.85)                      | 0.68 (1.06)   | 0.23 (1.20)    | 0.06 (0.99)     | -0.38 (1.25)    | -0.09 (1.21)     | —               |                   |                      |                    |                    |                    |                          |                            |
| Oral TU, 160 mg/d        | 0.26 (0.50)                       | 1.06 (0.81)   | 0.62 (1.00)    | 0.45 (0.71)     | 0.00 (1.04)     | 0.30 (0.99)      | 0.38 (0.98)     | —                 |                      |                    |                    |                    |                          |                            |
| IM TU, 1000 mg/12 wk     | -0.66 (0.39)                      | 0.15 (0.75)   | -0.30 (0.94)   | -0.47 (0.65)    | -0.91 (0.99)    | -0.62 (0.94)     | -0.53 (0.93)    | -0.91 (0.59)      | —                    |                    |                    |                    |                          |                            |
| IM TE, 250 mg/3 wk       | -0.47 (1.07)                      | 0.33 (0.86)   | -0.11 (1.37)   | -0.28 (1.19)    | -0.73 (1.41)    | -0.43 (1.36)     | -0.35 (1.36)    | -0.73 (1.18)      | 0.18 (1.14)          | —                  |                    |                    |                          |                            |
| IM TE, 250 mg/4 wk       | -0.09 (0.88)                      | 0.72 (1.10)   | 0.27 (1.23)    | 0.10 (1.03)     | -0.34 (1.27)    | -0.05 (1.23)     | 0.04 (1.23)     | -0.34 (1.01)      | 0.57 (0.97)          | 0.39 (1.39)        | —                  |                    |                          |                            |
| IM TC, 200 mg/4 wk       | 0.10 (1.03)                       | 0.90 (1.21)   | 0.46 (1.34)    | 0.29 (1.15)     | -0.15 (1.37)    | 0.14 (1.34)      | 0.23 (1.33)     | -0.16 (1.12)      | 0.76 (0.95)          | 0.57 (1.49)        | 0.19 (1.36)        | —                  |                          |                            |
| IM Sustanon, 100 mg/2 wk | 0.38 (0.90)                       | 1.19 (1.11)   | 0.74 (1.25)    | 0.57 (1.04)     | 0.13 (1.28)     | 0.42 (1.25)      | 0.51 (1.23)     | 0.13 (1.03)       | 1.04 (0.99)          | 0.86 (1.40)        | 0.47 (1.26)        | 0.28 (1.37)        | —                        |                            |
| IM Durateston 250 mg/4wk | 0.10 (1.03)                       | 0.91 (1.21)   | 0.46 (1.34)    | 0.29 (1.15)     | -0.15 (1.37)    | 0.14 (1.34)      | 0.23 (1.33)     | -0.15 (1.12)      | 0.76 (0.95)          | 0.58 (1.48)        | 0.19 (1.36)        | 0.00 (0.96)        | -0.28 (1.37)             | —                          |

Note: IM = intramuscular injection, TC = testosterone cypionate, TE = testosterone enanthate, TU = testosterone undecanoate. Standardized mean differences of less than zero indicate that the treatment specified in the row is more effective than the column treatment. To obtain standardized mean differences for comparisons in the opposite direction, negative values should be converted to positive values and vice versa. Bold (green cells) indicate statistical significance.  
 \*Random-effects model.  
 †Oral TU dose based on testosterone levels at baseline. Patients with total testosterone < 8 nmol/L received 120 mg/d; patients with total testosterone between 8 and 12 nmol/L received 160 mg/d (data not reported by dose).

Figure 1: PRISMA flow diagram showing selection of studies

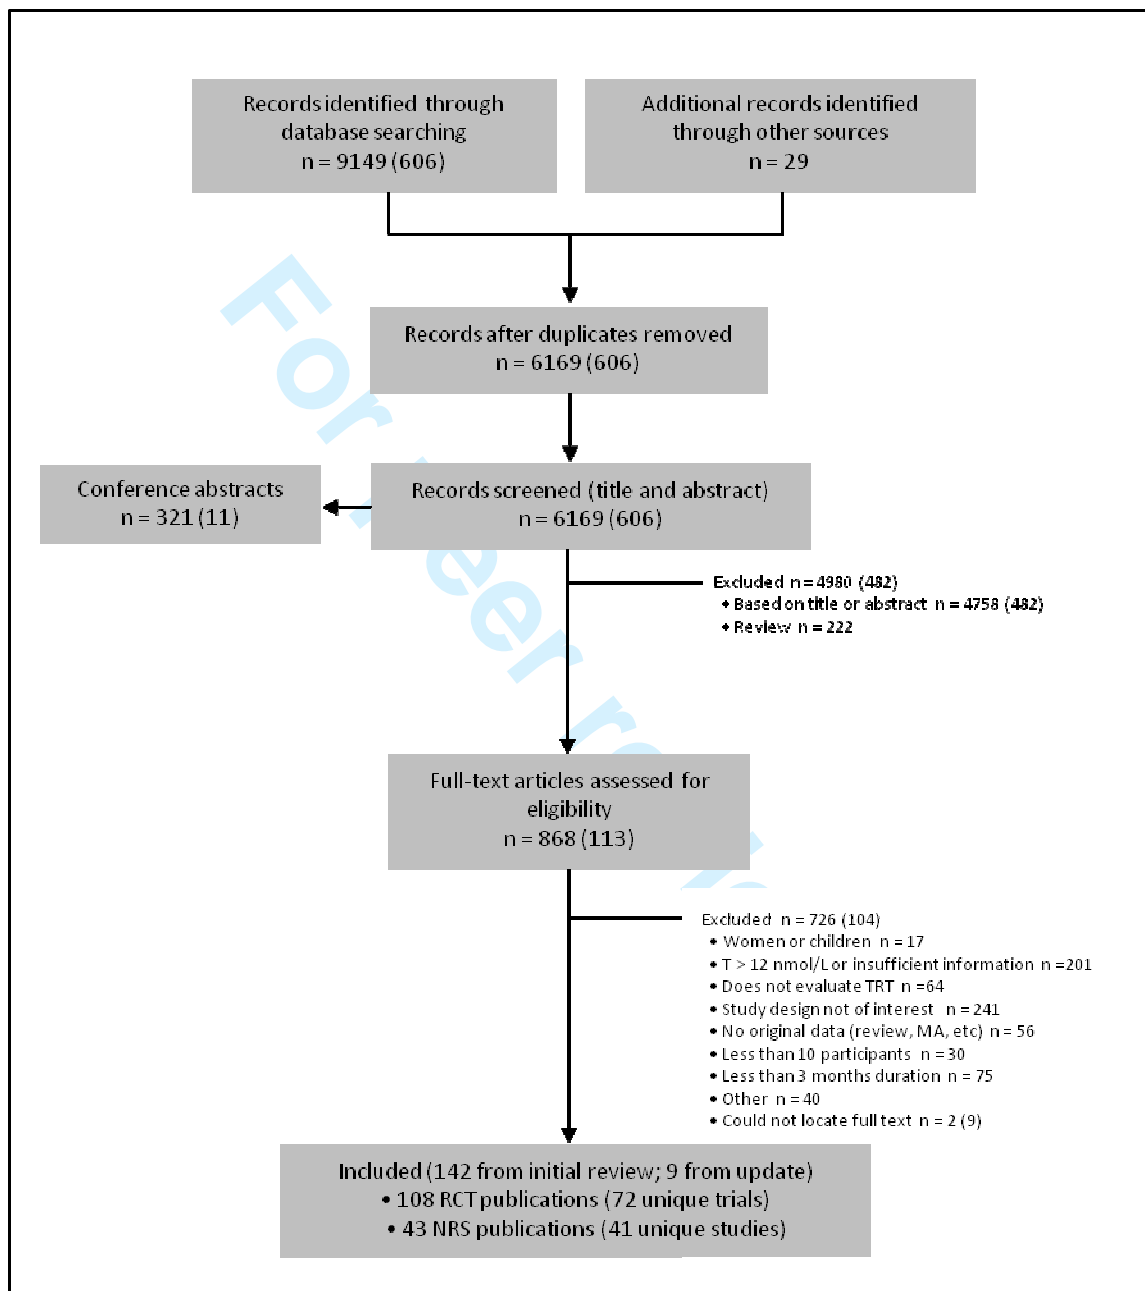



**Figure 2: Meta-analysis of the effect of testosterone on quality of life. Before (A) and after (B) removal of trials involving men with major comorbidities**

A)

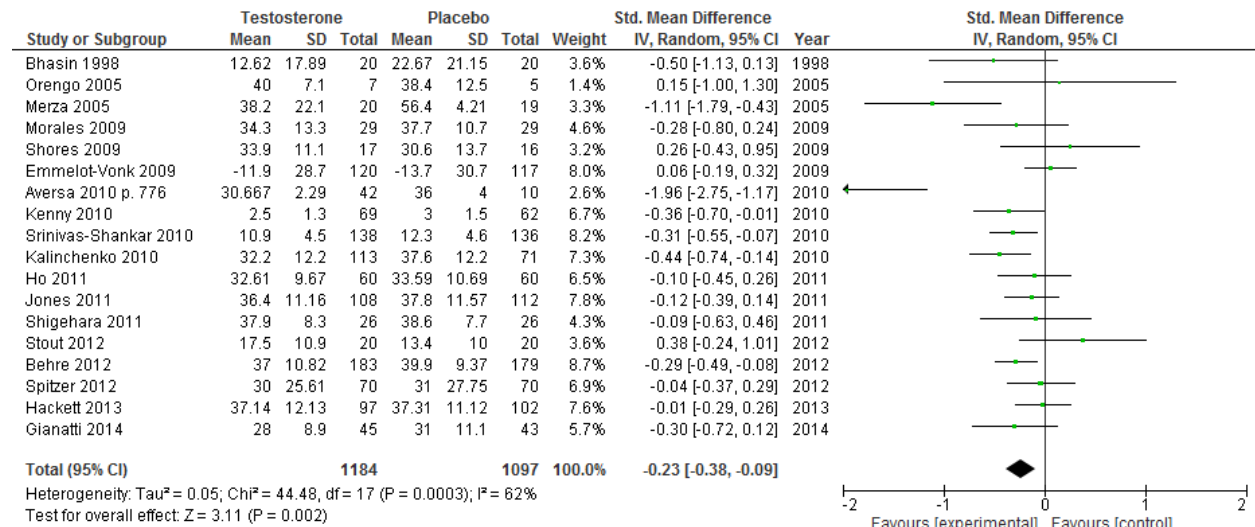

B)

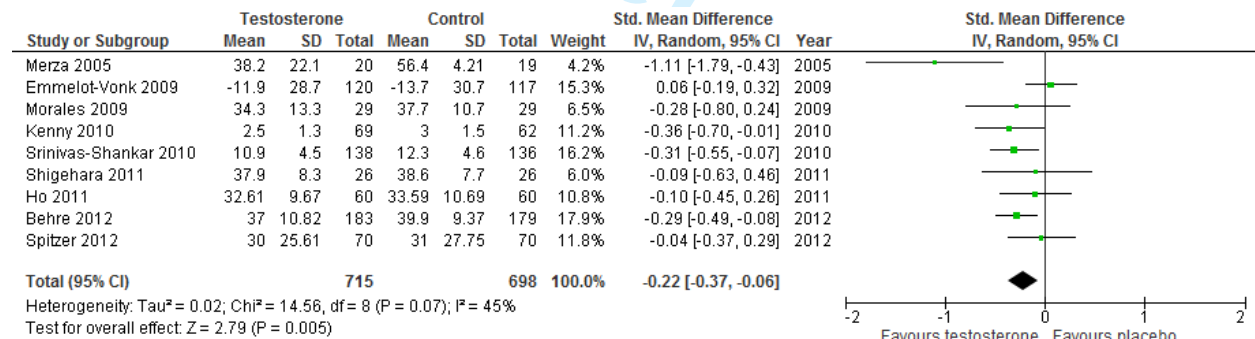

Figure 3: Evidence network for quality of life.

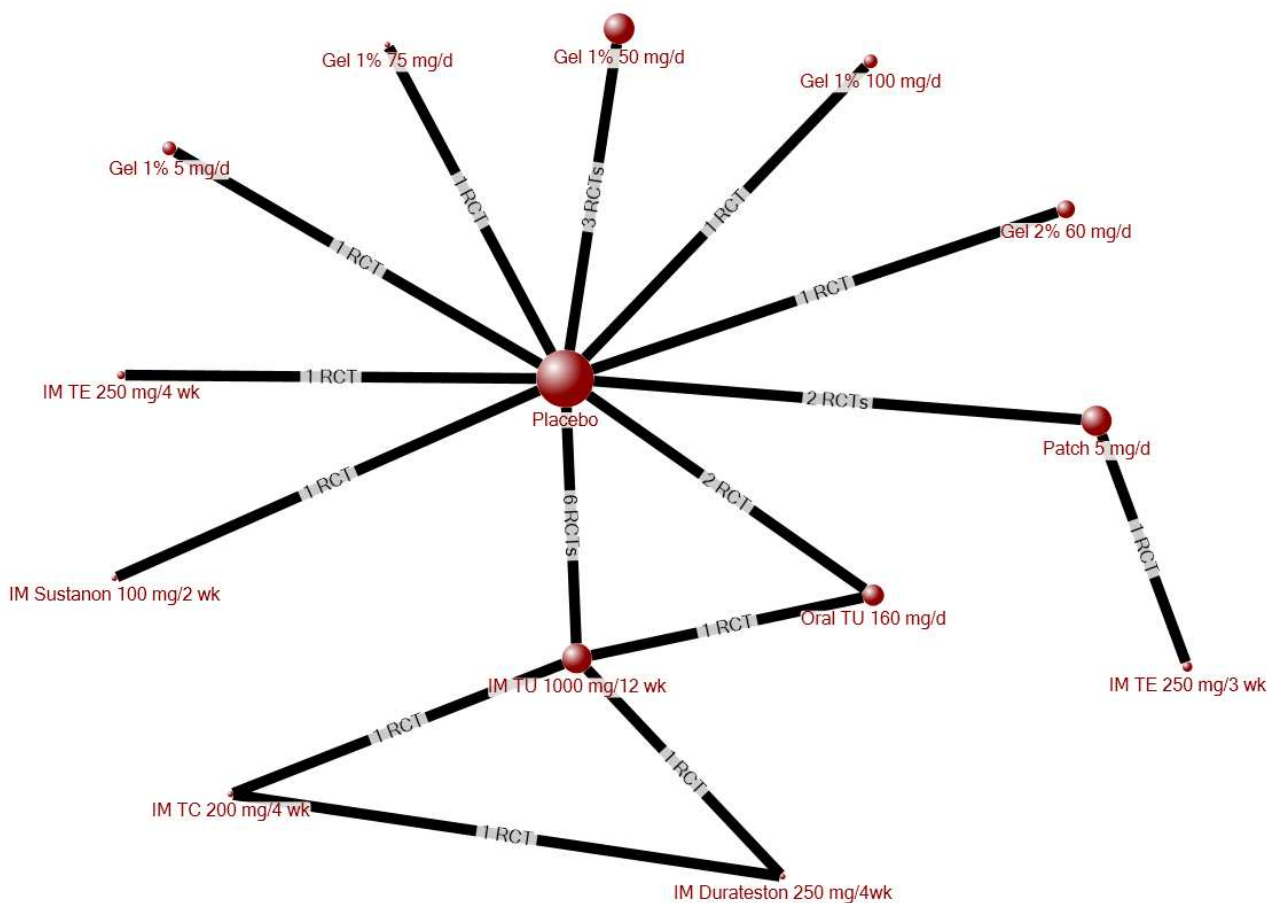

For peer review only

## Supplementary Online Content:

### Elliott et al. Testosterone replacement therapies in hypogonadal men: a systematic review and network meta-analysis

#### eAppendix 1: Search strategy

The search was originally executed on June 8, 2014 and updated October 13, 2015. The initial set of numbers in brackets for each line indicates the number of records located in the initial search, with the number located in the updated search indicated in the second set of brackets. The final step in the updated search applied a date limit to identify studies published since the initial search, with retrospective overlap of six months.

Testosterone Replacement Therapy  
Primary Studies - Final Strategies  
2014 Jun 3

Database: Embase Classic+Embase <1947 to 2014 June 02>, Ovid MEDLINE(R) In-Process & Other Non-Indexed Citations and Ovid MEDLINE(R) <1946 to Present> Search Strategy:

1 exp Testosterone/aa, ad, ae, tu (9143) (9790)  
2 Testosterone Congeners/ad, ae, tu (391) (397)  
3 exp Testosterone/ and Hormone Replacement Therapy/ (4361) (4636)  
4 exp Androgens/ and Hormone Replacement Therapy/ (5792) (6109)  
5 (testosteron\* adj3 (replac\* or substitut\* or supplement\* or therap\* or treatment\* or buccal or cream\$1 or gel or gels or implant\* or inject\* or oral\* or patch\* or transdermal\*).tw. (20369) (22080)  
6 (androgen\* adj (replac\* or substitut\* or supplement\* or therap\* or treatment\* or cream\$1 or gel or gels or implant\* or inject\* or patch\*).tw. (6312) (6675)  
7 (androgen\* adj3 (buccal\* or oral\* or transdermal\*).tw. (632) (690)  
8 TRT.tw. (2125) (2597)  
9 (testosterone adj (beta cyclopentylpropionate or cyclopentylpropionate or cipionate or cypionate or enanthate or enanthane or ethanate or heptonate or heptylate or oenanthate or undecanoate or undecylate or "17 undecylate").tw. (2636) (2878)  
10 ("8-Isotestosterone" or andriol or "andro 100" or "androgyn LA" or androderm or androfort or androgeol or androlin or andronaq or andropatch or androsorb or androstenolone or androtardyl or androtest or androtop or andrusol or axiron).tw. (1095) (1153)  
11 ("Bio-T-Gel" or Ciclosterone or "Cristerona T" or "Cristerone T" or CompleoTRT or "CP 601B" or Delatestryl or Depandro or Deposteron or Depostomead or Depo-Testosterone or Depotest or Depovirin or Depoviron or Delatestryl or Duratest or Durathate or Everone or "first-testosterone" or Fortesta or Rortigel or Hexanecarboxylate or Histerone or Homosteron\* or Intrinsa or Jenasteron or LibiGel or Livensa or Malerone or Malogen or Malogex or Mertestate).tw. (492) (521)  
12 (Nasobol or Nebido or "Neo-Hombreol F" or "Neo-testis" or Neotestis or "NSC 9700" or Opterone or Oreton or "Oreton-F" or Orquisteron).tw. (292) (316)  
13 (Pantestone or Perandren or Percutacrine androgenique or Percutacrine androgine or Pertestis or Primotest or Primoteston or Relibra or Restandol or Sterotate or Striant or Sustanon\$1 or "Sustason 250" or Synandrol).tw. (674) (695)  
14 (Teslen or "Testa-C" or Testamone or Testandrone or Testaqua or Testerone or Testex or Testiculosterone or Testim or Testo Enant or Testobase or Testoderm or Testogel or Testoject-50 or Testolin or Testoluton or Testopel or Testopropon or Testosteroid).tw. (691) (721)  
15 (Testostosterone or Testoviron or Testrin or Testro or Testrone or Theramex or Tostrelle or Testryl or Tostrex or Trans-Testosterone).tw. (604) (618)  
16 (UNII-3XMK78S47O or Undestor or Virilon or Virormone or Virosterone or Vogelxo).tw. (61) (71)  
17 or/1-16 (39453) (42333)  
18 exp Animals/ not (exp Animals/ and Humans/) (8702141) (9973287)  
19 17 not 18 (25517) (27341)

Supplemental Online Content: Elliott et al. Testosterone therapy in hypogonadal men: a systematic review and network meta-analysis.

20 (controlled clinical trial or randomized controlled trial).pt. (457659) (500621)  
 21 clinical trials as topic.sh. (169995) (179291)  
 22 (randomi#ed or randomly or RCT\$1 or placebo\*).tw. (1423548) 1633108  
 23 ((singl\* or doubl\* or trebl\* or tripl\*) adj (mask\* or blind\* or dumm\*)).tw. (296647) 325783  
 24 trial.ti. (292735) 343590  
 25 or/20-24 (1829141) 2069537  
 26 19 and 25 (3594) 3936  
 27 (comment or editorial or interview or letter or news).pt. (2802584) 3104977  
 28 26 not 27 (3546) 3882  
 29 (control\* adj2 trial\*).tw. (323672) 387855  
 30 (nonrandom\* or non-random\* or quasi-random\* or quasi-experiment\*).tw. (73609) 84252  
 31 (nRCT or nRCTs or non-RCT\$1).tw. (647) 921  
 32 (control\* adj3 ("before and after" or "before after")).tw. (6046) 6900  
 33 time series.tw. (33994) 39968  
 34 (pre- adj3 post-).tw. (110642) 133703  
 35 (pretest adj3 posttest).tw. (6260) 7263  
 36 (control\* adj2 stud\$3).tw. (346641) 393800  
 37 Control Groups/ (74764) 95125  
 38 (control\$ adj2 group\$1).tw. (752277) 862935  
 39 or/29-38 (1509227) 1742396  
 40 19 and 39 (2115) 2351  
 41 40 not 27 (2097) 2327  
 42 exp Cohort Studies/ (1517558) 1718806  
 43 cohort\$1.tw. (675350) 846152  
 44 Retrospective Studies/ (837256) 942566  
 45 (longitudinal or prospective or retrospective).tw. (1721897) 2022768  
 46 ((followup or follow-up) adj (study or studies)).tw. (89267) 96837  
 47 Observational study.pt. (2469) 15018  
 48 (observation\$2 adj (study or studies)).tw. (111012) 140783  
 49 ((population or population-based) adj (study or studies or analys#s)).tw. (26131) 29404  
 50 ((multidimensional or multi-dimensional) adj (study or studies)).tw. (187) 204  
 51 Comparative Study.pt. (1676994) 1744032  
 52 ((comparative or comparison) adj (study or studies)).tw. (185742) 201622  
 53 or/42-52 (4729450) 5296604  
 54 19 and 53 (3389) 3800  
 55 54 not 27 (3352) 3754  
 56 28 or 41 or 55 (6587) 7288  
 57 56 use prmz (3219) [ALL MEDLINE RECORDS] 3562  
 58 28 use prmz (1720) [MEDLINE RCTS] 1902  
 59 41 use prmz (845) [MEDLINE NON-RCTS] 961  
 60 55 use prmz (1837) [MEDLINE OBSERV] 2027  
 61 androgen therapy/ (3539) 4251  
 62 androgen deficiency/dt (507) 550  
 63 testosterone undecanoate/ (1591) 1764  
 64 testosterone cipionate/ (871) 924  
 65 testosterone enantate/ (2439) 2543  
 66 (testosteron\* adj3 (replac\* or substitut\* or supplement\* or therap\* or treatment\* or buccal or cream\$1 or gel or gels or implant\* or  
 47 inject\* or oral\* or patch\* or transdermal\*)).tw. (20369) 22080  
 67 (androgen\* adj (replac\* or substitut\* or supplement\* or therap\* or treatment\* or cream\$1 or gel or gels or implant\* or inject\* or  
 48 patch\*)).tw. (6312) 6675  
 68 (androgen\* adj3 (buccal\* or oral\* or transdermal\*)).tw. (632) 690  
 69 TRT.tw. (2125) 2597  
 70 (testosterone adj (beta cyclopentylpropionate or cyclopentylpropionate or cipionate or cypionate or enanthate or enanthane or  
 53 ethanate or heptonate or heptylate or oenanthate or undecanoate or undecylate or "17 undecylate")).tw. (2636) 2878  
 71 ("8-Isotestosterone" or andriol or "andro 100" or "androgyn LA" or androderm or androfort or androgel or androlin or andronaq or  
 54 andropatch or androsorb or androstenolone or androtardyl or androtest or androtop or andrusol or axiron).tw. (1095) 1153

Supplemental Online Content: Elliott et al. Testosterone therapy in hypogonadal men: a systematic review and network meta-analysis.

1  
2  
3 72 ("Bio-T-Gel" or Ciclosterone or "Cristerona T" or "Cristerone T" or CompleoTRT or "CP 601B" or Delatestryl or Depandro or  
4 Deposteron or Depostomead or Depo-Testosterone or Depotest or Depovirin or Depoviron or Delatestryl or Duratest or Durathate or  
5 Everone or "first-testosterone" or Fortesta or Rortigel or Hexanecarboxylate or Histerone or Homosteron\* or Intrinsa or Jenasteron or  
6 LibiGel or Livensa or Malerone or Malogen or Malogex or Mertestate).tw. (492) 521  
7 73 (Nasobol or Nebido or "Neo-Hombreol F" or "Neo-testis" or Neotestis or "NSC 9700" or Opterone or Oreton or "Oreton-F" or  
8 Orquisteron).tw. (292) 316  
9 74 (Pantestone or Perandren or Percutacrine androgenique or Percutacrine androgine or Pertestis or Primotest or Primoteston or  
10 Relibra or Restandol or Sterotate or Striant or Sustanon\$1 or "Sustason 250" or Synandrol).tw. (674) 695  
11 75 (Teslen or "Testa-C" or Testamone or Testandrone or Testaqua or Testerone or Testex or Testiculosterone or Testim or Testo Enant  
12 or Testobase or Testoderm or Testogel or Testoject-50 or Testolin or Testoluton or Testopel or Testopropon or Testosteroid).tw. (691) 724  
13 76 (Testostosterone or Testoviron or Testrin or Testro or Testrone or Theramex or Tostrelle or Testryl or Tostrex or Trans-  
14 Testosterone).tw. (604) 618  
15 77 (UNII-3XMK78S47O or Undestor or Virilon or Virormone or Virosterone or Vogelxo).tw. (61) 71  
16 78 or/61-77 (33099) 35844  
17 79 randomized controlled trial/ or controlled clinical trial/ (936519) 1028001  
18 80 exp "clinical trial (topic)"/ (104828) 167550  
19 81 (randomi#ed or randomly or RCT\$1 or placebo\*).tw. (1423548) 1633108  
20 82 ((singl\* or doubl\* or trebl\* or tripl\*) adj (mask\* or blind\* or dumm\*)).tw. (296647) 325783  
21 83 trial.ti. (292735) 343590  
22 84 or/79-83 (1962147) 2247698  
23 85 78 and 84 (4042) 4646  
24 86 exp animal experimentation/ or exp models animal/ or exp animal experiment/ or nonhuman/ or exp vertebrate/ (37422531)  
25 40432927  
26 87 exp humans/ or exp human experimentation/ or exp human experiment/ (28425359) 31071678  
27 88 86 not 87 (8998814) 9362929  
28 89 85 not 88 (3544) 4094  
29 90 (letter or editorial).pt. (2492646) 2754226  
30 91 89 not 90 (3515) 4053  
31 92 (control\* adj2 trial\*).tw. (323672) 387855  
32 93 (nonrandom\* or non-random\* or quasi-random\* or quasi-experiment\*).tw. (73609) 84252  
33 94 (nRCT or nRCTs or non-RCT\$1).tw. (647) 921  
34 95 (control\* adj3 ("before and after" or "before after")).tw. (6046) 6900  
35 96 time series analysis/ (13996) 16105  
36 97 time series.tw. (33994) 39968  
37 98 pretest posttest control group design/ (202) 246  
38 99 (pre- adj3 post-).tw. (110642) 133703  
39 100 (pretest adj3 posttest).tw. (6260) 7263  
40 101 controlled study/ (4336835) 4757018  
41 102 (control\* adj2 stud\$3).tw. (346641) 393800  
42 103 control group/ (74764) 95125  
43 104 (control\* adj2 group\$1).tw. (752277) 862935  
44 105 or/92-104 (5430128) 6026837  
45 106 78 and 105 (7057) 7742  
46 107 106 not 88 (3849) 4336  
47 108 107 not 90 (3833) 4315  
48 109 cohort analysis/ (334727) 409463  
49 110 cohort\$1.tw. (675350) 846152  
50 111 retrospective study/ (837256) 991388  
51 112 longitudinal study/ (153245) 179908  
52 113 prospective study/ (618128) 718067  
53 114 (longitudinal or prospective or retrospective).tw. (1721897) 2022768  
54 115 follow up/ (824941) 991095  
55 116 ((followup or follow-up) adj (study or studies)).tw. (89267) 96837  
56 117 observational study/ (58475) 94074  
57 118 (observation\$2 adj (study or studies)).tw. (111012) 140783  
58 119 population research/ (68859) 75117  
59 120 ((population or population-based) adj (study or studies or analys#s)).tw. (26131) 29404  
60

Supplemental Online Content: Elliott et al. Testosterone therapy in hypogonadal men: a systematic review and network meta-analysis.

1  
2  
3 121 ((multidimensional or multi-dimensional) adj (study or studies)).tw. (187) 204  
4 122 exp comparative study/ (2694962) 2848480  
5 123 ((comparative or comparison) adj (study or studies)).tw. (185742) 201622  
6 124 or/109-123 (5973302) 6713482  
7 125 78 and 124 (4650) 5383  
8 126 125 not 88 (3667) 4360  
9 127 126 not 90 (3625) 4304  
10 128 91 or 108 or 127 (7409) 8603  
11 129 128 use emczd (5052) [ALL EMBASE RECORDS] 5966  
12 130 91 use emczd (2221) [EMBASE RCTS] 2611  
13 131 108 use emczd (3091) [EMBASE NON-RCTS] 3471  
14 132 127 use emczd (2341) [EMBASE OBSERV] 2872  
15 133 58 or 130 (3941) [MEDLINE/EMBASE RCTS] 4513  
16 134 remove duplicates from 133 (2771) [UNIQUE RCTS] 3196  
17 135 134 use prmz (1666) [MEDLINE UNIQUE RCTS] 630  
18 136 134 use emczd (1105) [EMBASE UNIQUE RCTS] 2566  
19 137 59 or 131 (3936) [MEDLINE/EMBASE NON-RCTS] 4432  
20 138 137 not 133 (1817) [OVERLAP REMOVED] 2040  
21 139 remove duplicates from 138 (1633) [UNIQUE NON-RCTS] 1818  
22 140 139 use prmz (264) [MEDLINE UNIQUE NON-RCTS] 102  
23 141 139 use emczd (1369) [EMBASE UNIQUE NON-RCTS] 1716  
24 142 60 or 132 (4178) [MEDLINE/EMBASE OBSERV] 4899  
25 143 142 not (133 or 137) (2513) [OVERLAP REMOVED] 2975  
26 144 remove duplicates from 143 (2170) [UNIQUE OBSERV] 2546  
27 145 144 use prmz (1216) [MEDLINE UNIQUE OBSERV STUDIES] 943  
28 146 144 use emczd (954) [EMBASE UNIQUE OBSERV STUDIES] 1603  
29 147 134 or 139 or 144 (6574) [UNIQUE RECORDS – ALL STUDY TYPES] 7560

30 Limit applied in final line of search update: 2014 to present (Oct. 13, 2015; 6 mo overlap with original search): 606  
31  
32  
33  
34  
35  
36  
37  
38  
39  
40  
41  
42  
43  
44  
45  
46  
47  
48  
49  
50  
51  
52  
53  
54  
55  
56  
57  
58  
59  
60

## eAppendix 2: Included studies\*

\*The list of excluded studies is available from the authors on request.

Note: studies were not evaluated for inclusion on the basis reported outcomes.

1. Agarwal PK, Oefelein MG. Testosterone replacement therapy after primary treatment for prostate cancer. *J Urol*. 2005; 173: 533–6.
2. Agledahl I, Brodin E, Svartberg J, et al. Impact of long-term testosterone treatment on plasma levels of free TFPI and TF-induced thrombin generation ex vivo in elderly men with low testosterone levels. *Thrombo Haemostasis*. 2009; 102: 945.
3. Agledahl I, Hansen JB, Svartberg J. Impact of testosterone treatment on postprandial triglyceride metabolism in elderly men with subnormal testosterone levels. *Scand J Clin Lab Invest* 2008; 68: 641.
4. Amory JK, Watts NB, Easley KA, et al. Exogenous testosterone or testosterone with finasteride increases bone mineral density in older men with low serum testosterone. *J Clin Endocrinol Metab* 2004; 89: 503–10.
5. Andrade ES, Jr., Clapauch R, Buksman S. Short term testosterone replacement therapy improves libido and body composition. *Arq Bras Endocrinol Metabol* 2009;53:996–1004.
6. Arafa M, Zohdy W, Aboulsoud S, et al. Prevalence of late-onset hypogonadism in men with type 2 diabetes mellitus. *Andrologia* 2012; 44: 756.
7. Arver S, Sinha-Hikim I, Beall G, Guerrero M, Shen R, Bhasin S. Serum dihydrotestosterone and testosterone concentrations in human immunodeficiency virus-infected men with and without weight loss. *J Androl* 1999; 20: 611–8.
8. Atkinson RA, Srinivas-Shankar U, Roberts SA, et al. Effects of testosterone on skeletal muscle architecture in intermediate-frail and frail elderly men. *J Gerontol A Biol Sci Med Sci* 2010; 65: 1215.
9. Aversa A, Bruzziches R, Francomano D, et al. Effects of testosterone undecanoate on cardiovascular risk factors and atherosclerosis in middle-aged men with late-onset hypogonadism and metabolic syndrome: results from a 24-month, randomized, double-blind, placebo-controlled study. *J Sex Med* 2010; 7: 3495.
10. Aversa A, Bruzziches R, Francomano D, Spera G, Lenzi A. Efficacy and safety of two different testosterone undecanoate formulations in hypogonadal men with metabolic syndrome. *J Endocrinol Invest* 2010; 33: 776–3.
11. Aversa A, Bruzziches R, Francomano D, et al. Effects of long-acting testosterone undecanoate on bone mineral density in middle-aged men with late-onset hypogonadism and metabolic syndrome: Results from a 36 months controlled study. *Aging Male* 2012; 15: 96.
12. Aydogdu A, Bolu E, Sonmez A, et al. Effects of three different medications on metabolic parameters and testicular volume in patients with hypogonadotropic hypogonadism: 3-year experience. *Clin Endocrinol* 2013; 79: 243–51.
13. Bachman E, Travison TG, Basaria S, et al. Testosterone induces erythrocytosis via increased erythropoietin and suppressed hepcidin: evidence for a new erythropoietin/hemoglobin set point. *J Gerontol A Biol Sci Med Sci* 2014; 69: 725–735.
14. Basaria S, Coviello AD, Travison TG, et al. Adverse events associated with testosterone administration. *N Engl J Med* 2010; 363: 109–22.
15. Basaria S, Davda MN, Travison TG, Ullor J, Singh R, Bhasin S. Risk factors associated with cardiovascular events during testosterone administration in older men with mobility limitation. *J Gerontol A Biol Sci Med Sci* 2013; 68: 153–160.
16. Basurto L, Zarate A, Gomez R, Vargas C, Saucedo R, Galvan R. Effect of testosterone therapy on lumbar spine and hip mineral density in elderly men. *Aging Male* 2008; 11: 140–5.
17. Beggs LA, Yarrow JF, Conover CF, et al. Testosterone alters iron metabolism and stimulates red blood cell production independently of dihydrotestosterone. *Am J Physiol Endocrinol Metab* 2014; 307: E456–E461.
18. Behre HM, Tammela TL, Arver S., et al. A randomized, double-blind, placebo-controlled trial of testosterone gel on body composition and health-related quality-of-life in men with hypogonadal to low-normal levels of serum testosterone and symptoms of androgen deficiency over 6 months with 12 months open-label follow-up. *Aging Male* 2012; 15: 198.

Supplemental Online Content: Elliott et al. Testosterone therapy in hypogonadal men: a systematic review and network meta-analysis.

19. Bhasin S, Storer TW, Asbel-Sethi N, et al. Effects of testosterone replacement with a nongenital, transdermal system, Androderm, in human immunodeficiency virus-infected men with low testosterone levels. *J Clin Endocrinol Metab* 1998; 83: 3155–62.
20. Bhasin S, Storer TW, Javanbakht M, et al. Testosterone replacement and resistance exercise in HIV-infected men with weight loss and low testosterone levels. *JAMA* 2000; 283: 763–70.
21. Black AM, Day AG, Morales A. The reliability of clinical and biochemical assessment in symptomatic late-onset hypogonadism: Can a case be made for a 3-month therapeutic trial? *BJU International* 2004; 94: 1066–70.
22. Blick G. Optimal diagnostic measures and thresholds for hypogonadism in men with HIV/AIDS: comparison between 2 transdermal testosterone replacement therapy gels. *Postgrad.Med* 2013; 125: 30–9.
23. Borst SE, Yarrow JF, Conover CF, et al. Musculoskeletal and prostate effects of combined testosterone and finasteride administration in older hypogonadal men: a randomized, controlled trial. *Am J Physiol Endocrinol Metab* 2014; 306: E433–E442.
24. Borst SE, Yarrow JF, Fernandez C, et al. Cognitive effects of testosterone and finasteride administration in older Hypogonadal men. *Clin Interv Aging*. 2014; 9: 1327–33.
25. Boyanov MA, Boneva Z, Christov VG. Testosterone supplementation in men with type 2 diabetes, visceral obesity and partial androgen deficiency. *Aging Male* 2003; 6: 1–7.
26. Brockenbrough AT, Dittrich MO, Page ST, Smith T, Stivelman JC, Bremner WJ. Transdermal androgen therapy to augment EPO in the treatment of anemia of chronic renal disease. *Am J Kidney Dis* 2006; 47: 251–62.
27. Buisson J. Effects of testosterone supplementation on sexual function in elderly men: Results of a six month randomised, placebo controlled study. *Cahiers de l'Annee Gerontologique* 2010; 2: 144–6.
28. Burnett AL, Kan-Dobrosky N, Miller MG. Testosterone replacement with 1% testosterone gel and priapism: no definite risk relationship. *J Sex Med* 2013; 10: 1151–61.
29. Caminiti G, Volterrani M, Iellamo F, et al. Effect of long-acting testosterone treatment on functional exercise capacity, skeletal muscle performance, insulin resistance, and baroreflex sensitivity in elderly patients with chronic heart failure a double-blind, placebo-controlled, randomized study. *J Am College Cardiol* 2009; 54: 919.
30. Cavallini G, Biagiotti G, Giudice C. Association between Peyronie disease and low serum testosterone levels: detection and therapeutic considerations. *J Androl* 2012; 33: 381.
31. Cavallini G, Caracciolo S, Vitali G, Modenini F, Biagiotti G. Carnitine versus androgen administration in the treatment of sexual dysfunction, depressed mood, and fatigue associated with male aging. *Urology* 2004; 63: 641–6.
32. Chiang HS, Cho SL, Lin YC, Hwang TI. Testosterone gel monotherapy improves sexual function of hypogonadal men mainly through restoring erection: evaluation by IIEF score. *Urology* 2009; 73(4): 762-6.
33. Chiang HS, Hwang TI, Hsui YS, et al. Transdermal testosterone gel increases serum testosterone levels in hypogonadal men in Taiwan with improvements in sexual function. *Int J Impot Res* 2007; 19(4): 411–7.
34. Clague JE, Wu FC, Horan MA. Difficulties in measuring the effect of testosterone replacement therapy on muscle function in older men. *Int J Androl* 1999; 22(4): 261-265.
35. Dean JD, Carnegie C, Rodzvilla J, Smith T. Long-term effects of Testim 1% testosterone gel in hypogonadal men. *Rev Urol* 2005; 7(2): 87–94.
36. Dobs AS, Meikle AW, Arver S, Sanders SW, Caramelli KE, Mazer NA. Pharmacokinetics, efficacy, and safety of a permeation-enhanced testosterone transdermal system in comparison with bi-weekly injections of testosterone enanthate for the treatment of hypogonadal men. *J Clin Endocrinol Metab* 1999; 84(10): 3469–78.
37. Drinka PJ, Jochen AL, Cuisinier M, Bloom R, Rudman I, Rudman D. Polycythemia as a complication of testosterone replacement therapy in nursing home men with low testosterone levels. *J Am Geriatr Soc* 1995; 43(8): 899–901.
38. Eisenberg ML, Li S, Herder D, Lamb DJ, Lipshultz LI. Testosterone therapy and mortality risk. *Int J Impot Res* 2014; 27:46–8.
39. Emmelot-Vonk MH, Verhaar HJ, Nakhai Pour HR, et al. Effect of testosterone supplementation on functional mobility, cognition, and other parameters in older men: a randomized controlled trial. *JAMA* 2008; 299(1): 39–52.
40. Emmelot-Vonk MH, Verhaar HJ, Nakhai-Pour HR, Grobbee DE, van der Schouw YT. Effect of testosterone supplementation on sexual functioning in aging men: a 6-month randomized controlled trial. *Int J Impot Res* 2009; 21: 129-38.
41. Fennell C, Sartorius G, Ly LP, et al. Randomized cross-over clinical trial of injectable vs. implantable depot testosterone for maintenance of testosterone replacement therapy in androgen deficient men. *Clin Endocrinol* 2010; 73: 102.

Supplemental Online Content: Elliott et al. Testosterone therapy in hypogonadal men: a systematic review and network meta-analysis.



42. Ferrando AA, Sheffield-Moore M, Paddon-Jones D, Wolfe RR, Urban RJ. Differential anabolic effects of testosterone and amino acid feeding in older men. *J Clin Endocrinol Metab* 2003; 88:358–62.
43. Ferrando AA, Sheffield-Moore M, Yeckel CW, et al. Testosterone administration to older men improves muscle function: molecular and physiological mechanisms. *Am J Physiol Endocrinol Metab* 2002; 282: E601–E607.
44. Francomano D, Bruzziches R, Barbaro G, et al. Effects of testosterone undecanoate replacement and withdrawal on cardio-metabolic, hormonal and body composition outcomes in severely obese hypogonadal men: A pilot study. *J Endocrinol Invest* 2014; 37: 401–11.
45. Francomano D, Ilacqua A, Bruzziches R, et al. Effects of 5-year treatment with testosterone undecanoate on lower urinary tract symptoms in obese men with hypogonadism and metabolic syndrome. *Urology* 2014; 83: 167.
46. Francomano D, Lenzi A, Aversa A. Effects of five-year treatment with testosterone undecanoate on metabolic and hormonal parameters in ageing men with metabolic syndrome. *Int J Endocrinol* 2014; 2014: 527470.
47. Gianatti EJ, Dupuis P, Hoermann R, et al. Effect of testosterone treatment on glucose metabolism in men with type 2 diabetes: A randomized controlled trial. *Diabetes Care* 2014; 37: 2098–107.
48. Gianatti EJ, Dupuis P, Hoermann R, Zajac JD, Grossmann M. Effect of testosterone treatment on constitutional and sexual symptoms in men with type 2 diabetes in a randomized, placebo-controlled clinical trial. *J Clin Endocrinol Metab* 2014; 99: 3821–8.
49. Giltay EJ, Tishova YA, Mskhalaya GJ, et al. Effects of testosterone supplementation on depressive symptoms and sexual dysfunction in hypogonadal men with the metabolic syndrome. *J Sex Med* 2010; 7: 2572.
50. Gioia A, Ceccoli L, Ronconi V, et al. Vitamin D levels and bone mineral density: Are LH levels involved in the pathogenesis of bone impairment in hypogonadal men? *J Endocrinol Invest* 2014; 37: 1225–31.
51. Gooren LJ, Saad F, Haide A, et al. Decline of plasma 5 $\alpha$ -dihydrotestosterone (DHT) levels upon testosterone administration to elderly men with subnormal plasma testosterone and high DHT levels. *Andrologia* 2008; 40: 298.
52. Gopal RA, Bothra N, Acharya SV, et al. Treatment of hypogonadism with testosterone in patients with type 2 diabetes mellitus. *Endocr Pract* 2010; 16: 570–6.
53. Grinspoon S, Corcoran C, Askari H, et al. Effects of androgen administration in men with the AIDS wasting syndrome. A randomized, double-blind, placebo-controlled trial. *Ann Intern Med* 1998; 129: 18–26.
54. Grinspoon S, Corcoran C, Stanley T, Baaj A, Basgoz N, Klibanski A. Effects of hypogonadism and testosterone administration on depression indices in HIV-infected men. *J Clin Endocrinol Metab* 2000; 85: 60–5.
55. Guay AT, Perez JB, Fitaihi WA, Vereb M. Testosterone treatment in hypogonadal men: prostate-specific antigen level and risk of prostate cancer. *Endocr Pract* 2000; 6: 132–8.
56. Hackett G, Cole N, Bhartia M et al; BLAST Study Group. Testosterone replacement therapy improves metabolic parameters in hypogonadal men with type 2 diabetes but not in men with coexisting depression: the BLAST study. *J Sex Med* 2014; 11: 840.
57. Hackett G, Cole N, Bhartia M, et al. Testosterone replacement therapy with long-acting testosterone undecanoate improves sexual function and quality-of-life parameters vs. placebo in a population of men with type 2 diabetes. *J Sex Med* 2013; 10: 1612.
58. Hackett G, Cole N, Bhartia M, et al;BLAST Study Group. The response to testosterone undecanoate in men with type 2 diabetes is dependent on achieving threshold serum levels (the BLAST study). *Int J Clin Pract* 2014; 68: 203.
59. Hajjar RR, Kaiser FE, Morley JE. Outcomes of long-term testosterone replacement in older hypogonadal males: a retrospective analysis. *J Clin Endocrinol Metab* 1997; 82: 3793–6.
60. Handelsman DJ, Conway AJ, Boylan LM. Table . *J Clin Endocrinol Metab* 1990; 71: 216.
61. Heufelder AE, Saad F, Bunck MC, et al. Fifty-two-week treatment with diet and exercise plus transdermal testosterone reverses the metabolic syndrome and improves glycemic control in men with newly diagnosed type 2 diabetes and subnormal plasma testosterone. *J Androl* 2009; 30: 726.
62. Hildreth KL, Barry DW, Moreau KL, et al. Effects of testosterone and progressive resistance exercise in healthy, highly functioning older men with low-normal testosterone levels. *J Clin Endocrinol Metab* 2013; 98: 1891–1900.
63. Ho CC, Tong SF, Low WY, et al. A randomized, double-blind, placebo-controlled trial on the effect of long-acting testosterone treatment as assessed by the Aging Male Symptoms scale. *BJU Int* 2012; 110: 260.
64. Hohl A, Marques MO, MH Coral, et al. Evaluation of late-onset hypogonadism (andropause) treatment using three different formulations of injectable testosterone. *Arq Bras Endocrinol Metabol* 2009; 53: 989.

Supplemental Online Content: Elliott et al. Testosterone therapy in hypogonadal men: a systematic review and network meta-analysis.

65. Host C, Bojesen A, Frystyk J, Flyvbjerg A, Christiansen JS, Gravholt CH. Effect of sex hormone treatment on circulating adiponectin and subforms in Turner and Klinefelter syndrome. *Eur J Clin Invest* 2010; 40: 211–9.
66. Huang G, Bhasin S, Tang ER, et al. Effect of testosterone administration on liver fat in older men with mobility limitation: results from a randomized controlled trial. *J Gerontol A Biol Sci Med Sci*. 2013; 68: 954–9.
67. Jin B, Conway AJ, Handelsman DJ. Effects of androgen deficiency and replacement on prostate zonal volumes. *Clinical Endocrinology* 2001; 54: 437–45.
68. Jockenhovel F, Blum WF, Vogel E, et al. Testosterone substitution normalizes elevated serum leptin levels in hypogonadal men. *J Clin Endo Metabo* 1997; 82: 2510.
69. Jockenhovel F, Bullmann C, Schubert M, et al. Influence of various modes of androgen substitution on serum lipids and lipoproteins in hypogonadal men. *Metabolism* 1999; 48: 590.
70. Jockenhovel F, Minnemann T, Schubert M, et al. Comparison of long-acting testosterone undecanoate formulation versus testosterone enanthate on sexual function and mood in hypogonadal men. *Eur J Endocrinol* 2009; 160: 815.
71. Jockenhovel F, Minnemann T, Schubert M, et al. Timetable of effects of testosterone administration to hypogonadal men on variables of sex and mood. *Aging Male* 2009; 12: 113.
72. Jockenhovel F, Vogel E, Reinhardt W, et al. Effects of various modes of androgen substitution therapy on erythropoiesis. *Euro J Med Res* 1997; 2: 293.
73. Jones TH, Arver S, Behre HM, et al. Channer, TIMES2 Investigators. Testosterone replacement in hypogonadal men with type 2 diabetes and/or metabolic syndrome (the TIMES2 study). *Diabetes Care* 2011; 34: 828.
74. Kacker R, Connors W, Zade J, et al. Bone mineral density and response to treatment in men younger than 50 years with testosterone deficiency and sexual dysfunction or infertility. *J Urology* 2014; 191: 1072–6.
75. Kalinchenko S, Vishnevskiy EL, Koval AN, Mskhalaya GJ, Saad F. Beneficial effects of testosterone administration on symptoms of the lower urinary tract in men with late-onset hypogonadism: A pilot study. *Aging Male*. 2008; 11: 57–61.
76. Kalinchenko SY, Tishova Y.A, Mskhalaya GJ, et al. Effects of testosterone supplementation on markers of the metabolic syndrome and inflammation in hypogonadal men with the metabolic syndrome: the double-blinded placebo-controlled Moscow study. *Clin Endocrinol* 2010; 73: 602.
77. Kang SM, Jang Y, Kim JY, et al. Effect of oral administration of testosterone on brachial arterial vasoreactivity in men with coronary artery disease. *Am J Cardiol* 2002; 89: 862–4.
78. Kaplan AL, Trinh QD, Sun M, et al. Testosterone replacement therapy following the diagnosis of prostate cancer: Outcomes and utilization trends. *J Sex Med* 2014; 11: 1063–70.
79. Kapoor D, Clarke S, Stanworth R., et al. The effect of testosterone replacement therapy on adipocytokines and C-reactive protein in hypogonadal men with type 2 diabetes. *Eur J Endocrinol* 2007; 156: 595–602.
80. Kapoor D, Goodwin E, Channer KS, et al. Testosterone replacement therapy improves insulin resistance, glycaemic control, visceral adiposity and hypercholesterolaemia in hypogonadal men with type 2 diabetes. *Eur J Endocrinol* 2006; 154: 899.
81. Kaufman JM, Miller MG, Garwin JL, et al. Efficacy and safety study of 1.62% testosterone gel for the treatment of hypogonadal men. *J Sex Med* 2011; 8: 2079.
82. Kenny AM, Kleppinger A, Annis K, et al. Effects of transdermal testosterone on bone and muscle in older men with low bioavailable testosterone levels, low bone mass, and physical frailty. *J Am Geriatr Soc*. 2010; 58: 1134–43.
83. Kubler A, Schulz G, Cordes U, et al. The influence of testosterone substitution on bone mineral density in patients with Klinefelter's syndrome. *Exp Clin Endocrinol* 1992; 100: 129–32.
84. Kuhnert B, Byrne M, Simoni M, et al. Testosterone substitution with a new transdermal, hydroalcoholic gel applied to scrotal or non-scrotal skin: a multicentre trial. *Eur J Endocrinol* 2005; 153: 317.
85. Lu J, Fan J, Zhu J, et al. The prospective and randomized control study of Viagra combined with Andriol in the treatment of ED in the aging male. *Chinese J Androl* 2003; 17: 194.
86. Marks LS, Mazer NA, Mostaghel E, et al. Effect of testosterone replacement therapy on prostate tissue in men with late-onset hypogonadism: a randomized controlled trial. *JAMA* 2006; 296: 2351–61.
87. Mathur A, Malkin C, Saeed B, et al. Long-term benefits of testosterone replacement therapy on angina threshold and atheroma in men. *Eur J Endocrinol* 2009; 161: 443.
88. McCullough AR, Khera M, Goldstein I, et al. A multi-institutional observational study of testosterone levels after testosterone pellet (Testopel) insertion. *J Sex Med* 2012; 9: 594.

Supplemental Online Content: Elliott et al. Testosterone therapy in hypogonadal men: a systematic review and network meta-analysis.

89. McNicholas TA, Dean JD, Mulder H, Carnegie C, Jones NA. A novel testosterone gel formulation normalizes androgen levels in hypogonadal men, with improvements in body composition and sexual function. *BJU International*. 2003; 91: 69–74.
90. Merza Z, Blumsohn A, Mah PM, et al. Double-blind placebo-controlled study of testosterone patch therapy on bone turnover in men with borderline hypogonadism. *Int J Androl* 2006; 29: 381.
91. Minnemann T, Schubert M, Freude S, et al. Comparison of a new long-acting testosterone undecanoate formulation vs testosterone enanthate for intramuscular androgen therapy in male hypogonadism. *J Endocrinol Invest* 2008; 31: 718.
92. Montano M, Flanagan JN, Jiang L, et al. Transcriptional profiling of testosterone-regulated genes in the skeletal muscle of human immunodeficiency virus-infected men experiencing weight loss. *J Clin Endocrinol Metab*. 2007; 92: 2793–802.
93. Morales A, Black A, Emerson L, Barkin J, Kuzmarov I, Day A. Androgens and sexual function: a placebo-controlled, randomized, double-blind study of testosterone vs. dehydroepiandrosterone in men with sexual dysfunction and androgen deficiency. *Aging Male* 2009; 12: 104–12.
94. Morgentaler A, Benesh JA, Denes BS, Kan-Dobrosky N, Harb D, Miller MG. Factors influencing prostate-specific antigen response among men treated with testosterone therapy for 6 months. *J Sex Med* 2014; 11: 2818–25.
95. Morgunov LI, Denisova IA, Rozhkova TI, et al. Androgenic deficit and its treatment in stroke male patients with diabetes mellitus type II. *Zh Nevrol Psikiatr Im S S Korsakova* 2011; 111: 21.
96. Muraleedharan V, Marsh H, Kapoor D, Channer KS, Jones TH. Testosterone deficiency is associated with increased risk of mortality and testosterone replacement improves survival in men with type 2 diabetes. *Eur J Endocrinol* 2013; 169(6): 725–33.
97. Nakhai-Pour HR, Grobbee DE, Emmelot-Vonk MH, Bots ML, Verhaar HJ, van der Schouw YT. Oral testosterone supplementation and chronic low-grade inflammation in elderly men: a 26-week randomized, placebo-controlled trial. *Am Heart J* 2007;154(6): 1228.
98. O'Connell MD, Roberts SA, Srinivas-Shankar U, et al. Do the effects of testosterone on muscle strength, physical function, body composition, and quality of life persist six months after treatment in intermediate-frail and frail elderly men? *J Clin Endocrinol Metab* 2011; 96: 454.
99. Orenge CA, Fullerton L, Kunik ME. Safety and efficacy of testosterone gel 1% augmentation in depressed men with partial response to antidepressant therapy. *J Geriatr Psychiatry Neurol* 2005; 18: 20–4.
100. Page ST, Amory JK, Bowman FD, et al. Exogenous testosterone (T) alone or with finasteride increases physical performance, grip strength, and lean body mass in older men with low serum T. *J Clin Endocrinol Metab* 2005; 90: 1502–10.
101. Park NC, Yan BQ, Chung JM, Lee KM. Oral testosterone undecanoate (Andriol) supplement therapy improves the quality of life for men with testosterone deficiency. *Aging Male* 2003; 6: 86–93.
102. Raynaud JP, Legros JJ, Rollet J, et al. Efficacy and safety of a new testosterone-in-adhesive matrix patch applied every 2 days for 1 year to hypogonadal men. *J Steroid Biochem Mol Biol* 2008; 109: 168.
103. Reid IR, Wattie DJ, Evans MC, et al. Testosterone therapy in glucocorticoid-treated men. *Arch Intern Med* 1996; 156: 1173.
104. Rhoden EL, Morgentaler A. Influence of demographic factors and biochemical characteristics on the prostate-specific antigen (PSA) response to testosterone replacement therapy. *Int J Impot Res* 2006;18: 201–5.
105. Ross RJM, Siyambalapatiya S, Jonsson P, Koltowska-Haggstrom M, Gaillard R, Ho K. Cross-sectional analysis of testosterone therapies in hypopituitary men on stable pituitary hormone replacement. *Clin Endocrinol* 2009; 70: 907–13.
106. Saad F, Gooren LJ, Haider A, et al. A dose-response study of testosterone on sexual dysfunction and features of the metabolic syndrome using testosterone gel and parenteral testosterone undecanoate. *J Androl* 2008; 29: 102.
107. Saeedi M, Kosaryan M, Fekri K, et al. A randomized, double-blind, controlled trial of testosterone gel treatment versus vehicle control on the facial hair of young men with beta-thalassemia major. *J Dermatol Treat* 2007; 18: 271.
108. Schubert M, Bullmann C, Minnemann T, et al. Osteoporosis in male hypogonadism: responses to androgen substitution differ among men with primary and secondary hypogonadism. *Hormone Res* 2003; 60: 21.
109. Schubert M, Minnemann T, Hubler D, et al. Intramuscular testosterone undecanoate: pharmacokinetic aspects of a novel testosterone formulation during long-term treatment of men with hypogonadism. *J Clin Endocrinol Metab* 2004; 89: 5429.

Supplemental Online Content: Elliott et al. Testosterone therapy in hypogonadal men: a systematic review and network meta-analysis.

110. Schwartz JB, Volterrani M, Caminiti G, et al. Effects of testosterone on the Q-T interval in older men and older women with chronic heart failure. *Int J Androl* 2011; 34: e415.
111. Seftel AD, Mack RJ, Secrest AR, Smith TM. Restorative increases in serum testosterone levels are significantly correlated to improvements in sexual functioning. *J Androl* 2004; 25: 963–72.
112. Shabsigh R, Kaufman JM, Steidle C, Padma-Nathan H. Randomized study of testosterone gel as adjunctive therapy to sildenafil in hypogonadal men with erectile dysfunction who do not respond to sildenafil alone. *J Urol* 2004; 172: 658–63.
113. Sheffield-Moore M, Dillon EL, Casperson SL, et al. A randomized pilot study of monthly cycled testosterone replacement or continuous testosterone replacement versus placebo in older men. *J Clin Endocrinol Metab* 2011; 96: E1831–E1837.
114. Shigehara K, Sugimoto K, Konaka H, et al. Androgen replacement therapy contributes to improving lower urinary tract symptoms in patients with hypogonadism and benign prostate hypertrophy: a randomised controlled study. *Aging Male* 2011; 14: 53.
115. Shores MM, Kivlahan DR, Sadak TI, Li EJ, Matsumoto AM. A randomized, double-blind, placebo-controlled study of testosterone treatment in hypogonadal older men with subthreshold depression (dysthymia or minor depression). *J Clin Psychiatry* 2009; 70: 1009–16.
116. Shores MM, Smith NL, Forsberg CW, Anawalt BD, Matsumoto AM. Testosterone treatment and mortality in men with low testosterone levels. *J Clin Endocrinol Metab* 2012; 97: 2050–8.
117. Sih R, Morley JE, Kaiser FE, Perry HM, III, Patrick P, Ross C. Testosterone replacement in older hypogonadal men: a 12-month randomized controlled trial. *J Clin Endocrinol Metab* 1997; 82: 1661–7.
118. Simon D, Charles MA, Lahlou N, et al. Androgen therapy improves insulin sensitivity and decreases leptin level in healthy adult men with low plasma total testosterone: a 3-month randomized placebo-controlled trial. *Diabetes Care* 2001; 24: 2149–51.
119. Spitzer M, Basaria S, Travison TG, Davda MN, DeRogatis L, Bhasin S. The effect of testosterone on mood and well-being in men with erectile dysfunction in a randomized, placebo-controlled trial. *Andrology* 2013; 1: 475–82.
120. Spitzer M, Basaria S, Travison TG, et al. Effect of testosterone replacement on response to sildenafil citrate in men with erectile dysfunction: a parallel, randomized trial. *Ann Intern Med* 2012; 157: 681–91.
121. Srinivas-Shankar U, Roberts SA, Connolly MJ, et al. Effects of testosterone on muscle strength, physical function, body composition, and quality of life in intermediate-frail and frail elderly men: a randomized, double-blind, placebo-controlled study. *J Clin Endocrinol Metab* 2010; 95: 639.
122. Stanworth RD, Akhtar S, Channer KS, et al. The role of androgen receptor CAG repeat polymorphism and other factors which affect the clinical response to testosterone replacement in metabolic syndrome and type 2 diabetes: TIMES2 sub-study. *Eur J Endocrinol* 2014; 170: 193.
123. Steidle C, Schwartz S, Jacoby K, et al. AA2500 testosterone gel normalizes androgen levels in aging males with improvements in body composition and sexual function. *J Clin Endocrinol Metab* 2003; 88: 2673–81.
124. Stout M, Tew GA, Doll H, et al. Testosterone therapy during exercise rehabilitation in male patients with chronic heart failure who have low testosterone status: a double-blind randomized controlled feasibility study. *Am Heart J* 2012; 164: 893.
125. Strollo F, Strollo G, More M, et al. Low-intermediate dose testosterone replacement therapy by different pharmaceutical preparations improves frailty score in elderly hypogonadal hyperglycaemic patients. *Aging Male* 2013; 16: 33–7.
126. Sullivan DH, Roberson PK, Johnson LE, et al. Effects of muscle strength training and testosterone in frail elderly males. *Med Sci Sports Exerc* 2005; 37: 1664–72.
127. Svartberg J, Agledahl I, Figenschau Y, et al. Testosterone treatment in elderly men with subnormal testosterone levels improves body composition and BMD in the hip. *Int J Impot Res* 2008; 20: 378.
128. Swerdloff RS, Wang C, Cunningham G, et al. Long-term pharmacokinetics of transdermal testosterone gel in hypogonadal men. *J Clin Endocrinol Metab* 2000; 85: 4500–10.
129. Swerdloff RS, Wang C. Three-year follow-up of androgen treatment in hypogonadal men: preliminary report with testosterone gel. *Aging Male* 2003; 6: 207–11.
130. Tan RS, Pu SJ. A pilot study on the effects of testosterone in hypogonadal aging male patients with Alzheimer's disease. *Aging Male* 2003; 6: 13–7.

Supplemental Online Content: Elliott et al. Testosterone therapy in hypogonadal men: a systematic review and network meta-analysis.

131. Tan WS, Low WY, Ng CJ, et al. Efficacy and safety of long-acting intramuscular testosterone undecanoate in aging men: a randomised controlled study. *BJU Int* 2013; 111: 1130.
132. Taylor F, Levine L. Clomiphene citrate and testosterone gel replacement therapy for male hypogonadism: Efficacy and treatment cost. *J Sex Med* 2010; 7: 269–76.
133. Tenover JS. Effects of testosterone supplementation in the aging male. *J Clin Endocrinol Metab* 1992; 75: 1092–8.
134. Thomson S, Koren G, Van SV, Rieder M, Van Uum SHM. Testosterone concentrations in hair of hypogonadal men with and without testosterone replacement therapy. *Therapeutic Drug Monitor* 2009; 31: 779–82.
135. Tong SF, Ng CJ, Lee BC, et al. Effect of long-acting testosterone undecanoate treatment on quality of life in men with testosterone deficiency syndrome: a double blind randomized controlled trial. *Asian J Androl* 2012; 14: 604.
136. Trabado S, Maione L, Bry-Gauillard H, et al. Insulin-like peptide 3 (INSL3) in men with congenital hypogonadotropic hypogonadism/kallmann syndrome and effects of different modalities of hormonal treatment: A single-center study of 281 patients. *J Clin Endocrinol Metab* 2014; 99: E268–E275.
137. Trabado S, Maione L, Salenave S, et al. Estradiol levels in men with congenital hypogonadotropic hypogonadism and the effects of different modalities of hormonal treatment. *Fertil Steril* 2011; 95: 2324–9.
138. Trivison TG, Basaria S, Storer TW, et al. Clinical meaningfulness of the changes in muscle performance and physical function associated with testosterone administration in older men with mobility limitation. *J Gerontol A Biol Sci Med Sci* 2011; 66: 1090–9.
139. van den Bergh JP, Hermus AR, Spruyt AI, Sweep CG, Corstens FH, Smals AG. Bone mineral density and quantitative ultrasound parameters in patients with Klinefelter's syndrome after long-term testosterone substitution. *Osteoporos Int* 2001; 12: 55–62.
140. Vaughan C, Goldstein FC, Tenover JL. Exogenous testosterone alone or with finasteride does not improve measurements of cognition in healthy older men with low serum testosterone. *J Androl* 2007; 28: 875–82.
141. Vigen R, O'Donnell CI, Baron AE, et al. Association of testosterone therapy with mortality, myocardial infarction, and stroke in men with low testosterone levels. *JAMA* 2013; 310: 1829–36.
142. Vignera S. La, Calogero AE, D'Agata R, et al. Testosterone therapy improves the clinical response to conventional treatment for male patients with metabolic syndrome associated to late onset hypogonadism. *Minerva Endocrinologica* 2008; 33: 159.
143. Vignera S. La, Condorelli R, Vicari E, et al. Original immunophenotype of blood endothelial progenitor cells and microparticles in patients with isolated arterial erectile dysfunction and late onset hypogonadism: Effects of androgen replacement therapy. *Aging Male* 2011; 14: 183–9.
144. Wang C, Cunningham G, Dobs A, et al. Long-term testosterone gel (AndroGel) treatment maintains beneficial effects on sexual function and mood, lean and fat mass, and bone mineral density in hypogonadal men. *J Clin Endocrinol Metab* 2004; 89: 2085–98.
145. Wang C, Swerdloff RS, Iranmanesh A, et al. Effects of transdermal testosterone gel on bone turnover markers and bone mineral density in hypogonadal men. *Clin Endocrinol* 2001; 54: 739–50.
146. Wang C, Swerdloff RS, Iranmanesh A, et al. Transdermal testosterone gel improves sexual function, mood, muscle strength, and body composition parameters in hypogonadal men. *J Clin Endocrinol Metab* 2000; 85: 2839–53.
147. Wang YJ, Zhan JK, Huang W, et al. Effects of low-dose testosterone undecanoate treatment on bone mineral density and bone turnover markers in elderly male osteoporosis with low serum testosterone. *Int J Endocrinol* 2013; 570413.
148. Wiehle RD, Fontenot GK, Wike J, Hsu K, Nydell J, Lipshultz L. Enclomiphene citrate stimulates testosterone production while preventing oligospermia: A randomized phase II clinical trial comparing topical testosterone. *Fertil Steril* 2014; 102: 720–7.
149. Yaron M, Greenman Y, Rosenfeld JB, et al. Effect of testosterone replacement therapy on arterial stiffness in older hypogonadal men. *Eur J Endocrinol* 2009; 160: 839–46.
150. Zhang XW, Liu ZH, Hu XW, et al. Androgen replacement therapy improves psychological distress and health-related quality of life in late onset hypogonadism patients in Chinese population. *Chin Med J* 2012; 125: 3806–10.
151. Zitzmann M, Depenbusch M, Gromoll J, Nieschlag E. Prostate volume and growth in testosterone-substituted hypogonadal men are dependent on the CAG repeat polymorphism of the androgen receptor gene: a longitudinal pharmacogenetic study. *J Clin Endocrinol Metab* 2003; 88: 2049–54.

Supplemental Online Content: Elliott et al. Testosterone therapy in hypogonadal men: a systematic review and network meta-analysis.

## eAppendix 3: Characteristics of the included RCTs and NRS

eTable 1: Characteristics of included RCTs that reported at least 1 outcome of interest

| Author, year, page (companion publications)              | Population                                           | Duration | Groups (no. randomized)                                                         | Age, yr, mean (SD);                    | Baseline Total T, mean (SD), nmol/L | Industry funding |
|----------------------------------------------------------|------------------------------------------------------|----------|---------------------------------------------------------------------------------|----------------------------------------|-------------------------------------|------------------|
| Borst 2014, p. E433                                      | Hypogonadal men                                      | 12 mo    | Placebo (16)<br>IM TE, 125 mg/wk (14)                                           | 70.8 (9.7)<br>69.2 (8.0)               | 8.5 (10.1)<br>9.2 (11.9)            | Mix              |
| Gianatti 2014, p. 2098                                   | Type 2 diabetes, hypogonadal                         | 40 wk    | Placebo (43)<br>IM TU, 1000 mg/12 wk (45)                                       | 62 (7.4)<br>62 (8.1)                   | 8.5 (2.8)<br>8.7 (3.0)              | Yes              |
| Hackett 2013 p.1891 (Hackett 2013 p. 1612, Hackett 2014) | T2DM and symptoms of hypogonadism                    | 30 wk    | Placebo (102)<br>IM TU, 1000 mg/12 wk (97)                                      | 62.0 (9.3)<br>61.2 (10.5)              | 8.9 (3.8)<br>9.2 (3.1)              | Yes              |
| Wang 2013, p. 1                                          | Osteoporosis                                         | 24 mo    | Placebo (62)<br>Oral TU, 20 mg/d (62)<br>Oral TU, 40 mg/d (62)                  | 68.0 (4.8)<br>68.4 (5.5)<br>68.1 (5.4) | 7.6 (0.7)<br>7.6 (0.9)<br>7.4 (0.8) | No               |
| Behre 2012, p. 198                                       | AMS score >36                                        | 6 mo     | Placebo (179)<br>1% gel, 50 mg/d (183)                                          | 62.1 (6.3)<br>61.9 (6.6)               | 10.6 (2.6)<br>10.4 (2.6)            | Yes              |
| Spitzer 2012, p. 681 (Spitzer 2013)                      | Erectile dysfunction                                 | 14 wk    | Placebo (70)<br>1% gel, 100 mg/d (70)                                           | 54.6 (8.5)<br>55.1 (8.3)               | 8.8 (2.4)<br>8.6 (2.2)              | No               |
| Stout 2012, p. 893                                       | Chronic heart failure                                | 12 wk    | Placebo (20)<br>Sustanon,* 100 mg/2 wk (20)                                     | 65.9 (8.8)<br>68.3 (5.3)               | 11.2 (2.6)<br>10.4 (2.7)            | No               |
| Zhang 2012, p. 3806                                      | Positive score on ADAM questionnaire                 | 6 mo     | Vitamin E/C (80)<br>Oral TU, 120 or 160 mg/d (based on T level at baseline)(80) | 61.1 (7.1)<br>59.4 (6.3)               | 7.7 (0.8)<br>8.0 (0.7)              | No               |
| Ho 2011, p. 260 (Tan 2013, Tong 2012)                    | At least mild AMS symptoms                           | 42 wk    | Placebo (60)<br>IM TU, 1000 mg/12 wk (60)                                       | 53.0 (8.2)<br>53.4 (7.4)               | 8.9 (2)<br>9.1 (1.8)                | Yes              |
| Jones 2011, p. 828 (Stanworth 2014)                      | MetS or T2D with at least 2 symptoms of hypogonadism | 12 mo    | Placebo (112)<br>2% gel, 60 mg/d (108)                                          | 59.9 (9.4)<br>59.9 (9.1)               | 9.5 (3.3)<br>9.2 (2.6)              | Yes              |
| Kaufman 2011, p. 2079                                    | Hypogonadal, "otherwise healthy"                     | 6 mo     | Placebo (40)<br>1.62% gel, 40.5 mg/d (234)                                      | 55.5 (10.3)<br>53.6 (9.5)              | 10.2 (NR)<br>9.8 (NR)               | Yes              |
| Sheffield-Moore 2011, p. E1831                           | Community-dwelling men                               | 5 mo     | Placebo (8)<br>IM TE, 100 mg/wk (8)                                             | 65 (3)<br>73 (8)                       | 11.8 (2.9)<br>11.9(2.9)             | No               |

Supplemental Online Content: Elliott et al. Testosterone therapy in hypogonadal men: a systematic review and network meta-analysis.

For peer review only - <http://bmjopen.bmj.com/site/about/guidelines.xhtml>

| Author, year, page (companion publications)                                    | Population                   | Duration    | Groups (no. randomized)                                                               | Age, yr, mean (SD);                    | Baseline Total T, mean (SD), nmol/L     | Industry funding |
|--------------------------------------------------------------------------------|------------------------------|-------------|---------------------------------------------------------------------------------------|----------------------------------------|-----------------------------------------|------------------|
| Shigehara 2011, p. 53                                                          | Benign prostate hypertrophy  | 12 mo       | No treatment (26)<br>IM TE, 250 mg/4 wk (26)                                          | 68.9 (9.1)<br>72 (6.5)                 | Free T, pg/ml<br>6.7 (1.9)<br>7.0 (1.7) | NR               |
| Aversa 2010, p. 776                                                            | MetS or T2DM                 | 6 mo        | Placebo (10)<br>Oral TU 160 mg/d (10)<br>IM TU 1000 mg/12 wk (32)                     | 55 (5)<br>57 (8)<br>58 (10)            | 11.1<br>(NR by group)                   | NR               |
| Aversa 2010, p. 3495                                                           | MetS or T2DM                 | 12 mo       | Placebo (10)<br>IM TU, 1000 mg/12wk (40)                                              | 57 (8)<br>58 (10)                      | 9.0 (1.7)<br>8.33 (2.4)                 | NR               |
| Basaria 2010, p. 109 (Bachman 2014, Huang 2013, Basaria 2013, Travison 2011)   | Limited mobility             | 6 mo        | Placebo (103)<br>1% gel, 100 mg/d (106)                                               | 74 (5)<br>74 (6)                       | 8.2 (2.3)<br>8.7 (2.0)                  | No               |
| Kalinchenko 2010, p. 602 (Giltay 2010)                                         | MetS                         | 30 wk       | Placebo (71)<br>IM TU, 1000 mg/12wk (113)                                             | 52.8 (9.67)<br>51.6 (9.76)             | 7.5 (5.2)<br>6.7 (3.0)                  | Yes              |
| Kenny 2010, p. 1134                                                            | Low bone mass and frailty    | 12–24 mo    | Placebo (62)<br>1% gel, 5 mg/d (69)                                                   | 76.3 (8.0)<br>77.9 (7.3)               | 14.5 (6.7)<br>13.2 (6.2)                | Mix              |
| Srinivas-Shankar 2010, p. 639 (O'Connell 2010, Atkinson 2010)                  | Intermediate-frail and frail | 6 mo        | Placebo (136)<br>1% gel, 50 mg/d (138)                                                | 73.9 (6.4)<br>73.7 (5.7)               | 10.9 (3.1)<br>11 (3.2)                  | Yes              |
| Caminiti 2009, p. 919 (Schwartz 2011)                                          | Chronic heart failure        | 12 wk       | Placebo (35)<br>IM TU, 1000 mg/6 wk (35)                                              | 69 (66–74)<br>71 (67–76)               | 7.3 (7.3)<br>8.0 (6.2)                  | No               |
| Chiang 2009, p. 467                                                            | Hypogonadal men              | 3 mo        | Placebo (20)<br>1% gel, 50 mg/d (20)                                                  | NR                                     | NR                                      | NR               |
| Emmelot-Vonk, 2009, p. 129 (Emmelot-Vonk 2008, Nakhai-Pour 2007, Buisson 2010) | Moderately low T levels      | 26 wk       | Placebo (117)<br>Oral TU, 160 mg/d (120)                                              | 67.4 (4.9)<br>67.1 (5.0)               | 10.4 (1.9)<br>11.0 (1.9)                | No               |
| Heufelder 2009, p. 726                                                         | MetS and T2DM                | 52 wk       | Placebo (16)<br>1% gel, 50 mg/d (16)                                                  | 55.9 (6)<br>57.3 (5.6)                 | 10.4 (0.8)<br>10.5 (0.8)                | Yes              |
| Hohl 2009, p. 989                                                              | High AMS score               | 12 or 14 wk | IM TU, 1000 mg/6 wk (10)<br>IM TC, 200 mg/4wk (11)<br>Durateston, IM, 250 mg/4wk (11) | 59.6 (8.9)<br>59.6 (7.1)<br>60.4 (8.8) | 9.9 (1.1)<br>10.1 (1.1)<br>9.9 (1.5)    | No               |
| Mathur 2009, p. 443                                                            | Chronic angina pectoris      | 12 mo       | Placebo (7)                                                                           | 67.8 (7.9)                             | 10.1 (2.8)                              | Yes              |

Supplemental Online Content: Elliott et al. Testosterone therapy in hypogonadal men: a systematic review and network meta-analysis.

For peer review only - <http://bmjopen.bmj.com/site/about/guidelines.xhtml>

| Author, year, page (companion publications)  | Population                                           | Duration | Groups (no. randomized)                                                           | Age, yr, mean (SD);                           | Baseline Total T, mean (SD), nmol/L | Industry funding |
|----------------------------------------------|------------------------------------------------------|----------|-----------------------------------------------------------------------------------|-----------------------------------------------|-------------------------------------|------------------|
|                                              |                                                      |          | IM TU, 1000 mg/12 wk (8)                                                          | 62.1 (5.2)                                    | 9.8 (1.9)                           |                  |
| Morales 2009, p. 104                         | Sexual dysfunction                                   | 4 mo     | Placebo (29)<br>Oral TU, 160 mg/d (29)                                            | 60.2 (9.6)<br>59.0 (10.6)                     | 10.0 (5.5)<br>10.2 (4.9)            | Yes              |
| Shores 2009, p. 1009                         | Dysthymia or minor depression                        | 12 wk    | Placebo (16)<br>1% gel, 75 mg/d (17)                                              | 61.7 (7.0)<br>57.1 (5.7)                      | 9.3 (3.4)<br>10.1 (3.7)             | Mix              |
| Agledahl 2008, p. 641                        | Subnormal total T                                    | 52 wk    | Placebo (13)<br>IM TU, 1000 mg/12 wk (14)                                         | 69.3 (5.0)<br>68.9 (5.4)                      | 8.2 (2.4)<br>8.5 (1.7)              | Mix              |
| Basurto 2008, p. 140                         | Low total T                                          | 12 mo    | Placebo (23)<br>IM TE, 250 mg/3wk (25)                                            | 63.1 (7.7)<br>63.2 (8.5)                      | 10.8 (1.3)<br>10.4 (1.1)            | No               |
| Raynaud 2008, p. 168                         | Hypogonadal men                                      | 6 mo     | Patch, 4.8 mg/d(188)<br>IM TE, 250 mg/3 wk (36)                                   | 42.0 (12.7)<br>40.7 (10.5)                    | 4.6 (3.2)<br>5.1 (3.3)              | Yes              |
| Svartberg 2008, p. 378                       | NR                                                   | 12 mo    | Placebo (19)<br>IM TU, 1000 mg/12 wk (19)                                         | 69 (5)<br>69 (5)                              | 8.2 (2.1)<br>8.4 (1.7)              | Mix              |
| Chiang 2007, p. 411                          | Hypogonadal men                                      | 3 mo     | Placebo (20)<br>1% gel, 50 mg/d (20)                                              | 56.1 (14.6)<br>47.9 (17.0)                    | 9.1 (6.9)<br>7.4 (5.6)              | Yes              |
| Brockenbrough 2006, p. 251                   | Hemodialysis-dependent end-stage renal disease       | 6 mo     | Placebo (21)<br>1% gel, 100 mg/d (19)                                             | 53.0 (17.2)<br>58.9 (14.9)                    | 7.0 (3.0)<br>7.6 (2.2)              | Yes              |
| Marks 2006, p. 2351                          | Symptoms of late-onset hypogonadism                  | 6 mo     | Placebo (22)<br>IM TE, 150 mg/2wk (22)                                            | 68 (NR)<br>70 (NR)                            | 8.7 (1.6)<br>7.7 (1.4)              | Mix              |
| Merza 2006, p. 381                           | Sexual dysfunction                                   | 6 mo     | Placebo (19)<br>Patch, 5 mg/d (20)                                                | 59.7 (10.2)<br>63.0 (9.0)                     | 7.5 (2.5)<br>8.4 (3.3)              | Yes              |
| Kuhnert 2005, p. 317                         | Primary, secondary, LOH and symptoms of T deficiency | 24 wk    | Patch, 5 mg/d (52)<br>2.5%, gel, 125 mg/d (56)<br>2.5%, scrotal gel, 25 mg/d (54) | 53 (IQR 16)<br>52.2 (IQR 22.5)<br>50 (IQR 21) | NR                                  | Yes              |
| Orengo 2005, p. 20                           | Treatment-resistant depression                       | 12 wk    | Placebo (5)<br>1% gel, 50 mg/d (7)                                                | 63 (8.5) (NR by group)                        | 8.9 (1.7)<br>10.2 (2.3)             | No               |
| Amory 2004, p. 503 (Page 2005, Vaughan 2007) | T below the range of normal for young adult men      | 36 mo    | Placebo (24)<br>IM TE 200 mg/2wk (24)                                             | 71 (4)<br>71 (4)                              | 10.1 (2.1)<br>9.9 (1.6)             | No               |
| Cavallini 2004, p. 641                       | Symptoms of androgen decline                         | 6 mo     | Placebo (45)<br>Oral TU, 160 mg/d (40)                                            | 63 (NR)<br>64 (NR)                            | 10.5 (2.1)<br>9.9 (1.8)             | No               |

Supplemental Online Content: Elliott et al. Testosterone therapy in hypogonadal men: a systematic review and network meta-analysis.

For peer review only - <http://bmjopen.bmj.com/site/about/guidelines.xhtml>



| Author, year, page (companion publications)                                 | Population                                                          | Duration | Groups (no. randomized)                                                               | Age, yr, mean (SD);                                    | Baseline Total T, mean (SD), nmol/L              | Industry funding |
|-----------------------------------------------------------------------------|---------------------------------------------------------------------|----------|---------------------------------------------------------------------------------------|--------------------------------------------------------|--------------------------------------------------|------------------|
| Schubert 2004, p. 5429 (Jockenhovel 2009, Jockenhovel 2009, Minnemann 2008) | Primary or secondary hypogonadism                                   | 30 wk    | IM TU, 1000 mg/9 wk (20)<br>IM TE, 250 mg/3 wk (20)                                   | 41.1 (13.4)<br>36.3 (12.3)                             | 3.9 (4.4)<br>2.7 (2.3)                           | Mix              |
| Shabsigh 2004, p. 658 (Burnett 2013, Wang 2001, Swerdloff 2000)             | Erectile dysfunction not responsive to sildenafil                   | 12 wk    | Placebo (36)<br>1% gel, 50 mg/d (39)                                                  | 59.1 (9.4)<br>56.8 (10.2)                              | 65% had T < 10.4 (NR by group)                   | Yes              |
| Boyanov 2003, p. 1                                                          | T2DM, obesity, and "symptoms of andropause or erectile dysfunction" | 3 mo     | No treatment (24)<br>Oral TU, 120 mg/d (24)                                           | All: 57.5 (4.8) (NR by group)                          | 10.76 (11.20)<br>9.56 (2.33)                     | NR               |
| McNicholas 2003, p. 69                                                      | ≥ 1 symptoms of "low T"                                             | 90 d     | Patch, 5 mg/d (68)<br>1% gel, 50 mg/d (68)<br>1% gel, 100 mg/d (72)                   | 57.9 (10.2)<br>59.0 (9.5)<br>56.7 (10.3)               | 7.90 (2.2)<br>7.95 (2.2)<br>7.92 (2.4)           | Yes              |
| Steidle 2003, p. 2673 (Seftel 2004)                                         | ≥ 1 symptoms of "low T"                                             | 90 d     | Placebo (99)<br>Patch, 5 mg/d (102)<br>1% gel, 50 mg/d (99)<br>1% gel, 100 mg/d (106) | 56.8 (10.8)<br>60.5 (9.7)<br>58.1 (9.7)<br>56.8 (10.6) | 7.9 (2.8)<br>8.3 (2.4)<br>8.1 (2.0)<br>8.1 (2.1) | Yes              |
| Tan 2003, p. 13                                                             | Alzheimer's disease                                                 | 12 mo    | Placebo (5)<br>IM TE, 200mg/2wk (5)                                                   | 68.9 (NR)<br>72.4 (NR)                                 | NR<br>3.6 (NR)                                   | No               |
| Ferrando 2002, p. 358 (Ferrando 2003)                                       | "Healthy older men"                                                 | 6 mo     | Placebo (5)<br>IM TE 50–400 mg/wk (7)                                                 | 67 (6.7)<br>68 (7.9)                                   | 9.8 (4.3)<br>12.4 (4.4)                          | No               |
| Kang 2002, p. 862                                                           | Coronary artery disease                                             | 12 wk    | Placebo (17)<br>Oral TU, 160 mg/d (18)                                                | 58 (9)<br>57 (7)                                       | Free T, pg/ml<br>13.8 (1.8)<br>9.9 (3.1)         | NR               |
| Simon 2001, p. 2149                                                         | Healthy adult men                                                   | 3 mo     | Placebo (6)<br>Gel, 125 mg/d (6)                                                      | 55.4 (3.6)<br>52.8 (4.2)                               | 9.4 (1.0)<br>8.3 (0.3)                           | NR               |
| Bhasin 2000, p. 763                                                         | HIV-infected with weight loss                                       | 16 wk    | Placebo (14)<br>IM TE, 100 mg/wk (17)                                                 | 41.8 (9.4)<br>40.8 (4.9)                               | 6.1 (2.9)<br>7.1 (3.0)                           | No               |
| Wang 2000, p. 2839                                                          | Primary, secondary or late-onset hypogonadism                       | 90 d     | Patch, 5 mg/d (76)<br>1% gel, 50 mg/d (76)<br>1% gel, 100 mg/d (78)                   | 51.1 (NR)<br>51.3 (NR)<br>51.0 (NR)                    | 8.2 (4.8)<br>8.2 (4.6)<br>8.6 (4.8)              | Mix              |

Supplemental Online Content: Elliott et al. Testosterone therapy in hypogonadal men: a systematic review and network meta-analysis.

For peer review only - <http://bmjopen.bmj.com/site/about/guidelines.xhtml>

## Elliott Page 16 (Supplement)

| Author, year, page (companion publications)                | Population                               | Duration | Groups (no. randomized)            | Age, yr, mean (SD); | Baseline Total T, mean (SD), nmol/L | Industry funding |
|------------------------------------------------------------|------------------------------------------|----------|------------------------------------|---------------------|-------------------------------------|------------------|
| Clague 1999, p. 261                                        | Community-living                         | 3 mo     | Placebo (7)                        | 65.3 (1.8)          | 11.6 (0.9)                          | No               |
|                                                            |                                          |          | IM TE, 200 mg/2wk (7)              | 68.1 (6.6)          | 11.3 (1.7)                          |                  |
| Dobs 1999, p. 3469                                         | Receiving TRT for at least 3 mo          | 24 wk    | Patch, 5 mg/d (33)                 | 44.3 (11.1)         | 5.8 (2.7)                           | Mix              |
|                                                            |                                          |          | IM TE, 200 mg/2wk (33)             | 44.9 (11.6)         | 6.3 (3.3)                           |                  |
| Bhasin 1998, p. 3155 (Arver 1999)                          | HIV                                      | 12 wk    | Placebo (21)<br>Patch, 5 mg/d (20) | NR                  | 7.3 (2.9)<br>9.0 (1.7)              | Mix              |
| Grinspoon 1998, p. 18 (Grinspoon 2000)                     | AIDS wasting syndrome                    | 6 mo     | Placebo (26)                       | 44 (9)              | 10.1 (6.4)                          | No               |
|                                                            |                                          |          | IM TE, 300 mg/3wk (26)             | 40 (7)              | 11.3 (5.4)                          |                  |
| Jockenhovel 1997, p. 2510                                  | Primary or secondary androgen deficiency | 12 wk    | IM TE, 250 mg/3 wk (10)            | 30.0 (7.3)          | 1.6 (1.3)                           | NR               |
|                                                            |                                          |          | Pellets, 1200 mg (12)              | 36.3 (11.1)         | 1.9 (1.1)                           |                  |
| Jockenhovel 1997, p. 293 (Jockenhovel 1999, Schubert 2001) | Primary or secondary androgen deficiency | 210 d    | Oral TU, 160 mg/d (13)             | 34.5 (14.1)         | 2.9 (1.4)                           | NR               |
|                                                            |                                          |          | IM TE, 250 mg/3wk (15)             | 31.8 (10.1)         | 2.3 (2.3)                           |                  |
|                                                            |                                          |          | Pellets, 1200 mg (15)              | 35.8 (10.4)         | 2.7 (1.5)                           |                  |
| Sih 1997, p. 1661                                          | Community-dwelling healthy men           | 12 mo    | Placebo (15)                       | 68 (6)              | 8.1 (0.7)                           | NR               |
|                                                            |                                          |          | IM TC, 200 mg/2wk (17)             | 65 (7)              | 10.2 (0.9)                          |                  |

Note: ADAM = androgen deficiency of the aging male, AMS = Aging Males' Symptoms [scale], IM = intramuscular, IQR = interquartile range, LOH = late onset hypogonadism, MetS = metabolic syndrome, NR = not reported, T = testosterone, T2DM = type 2 diabetes mellitus, TC = testosterone cypionate, TE = testosterone enanthate, TRT = testosterone replacement therapy, TU = testosterone undecanoate.

\*Blend of testosterone propionate, testosterone phenylpropionate, testosterone isocaproate, and testosterone decanoate.

eTable 2: Characteristics of included non-randomized studies that reported at least one outcome of interest

| Study                       | Population                                                               | Duration              | Group (no. in group)                                  | Age, yr mean (SD)              | Baseline total T, mean (SD), nmol/L* | Industry funding |
|-----------------------------|--------------------------------------------------------------------------|-----------------------|-------------------------------------------------------|--------------------------------|--------------------------------------|------------------|
| <b>Retrospective cohort</b> |                                                                          |                       |                                                       |                                |                                      |                  |
| Aydogdu 2013, p. 243        | IHH                                                                      | 24 wk                 | Sustanon,† IM 250 mg/3wk (28)<br>1% gel, 50 mg/d (24) | 20.9 (1.4)<br>21.3 (1.6)       | 0.9 (0.6)<br>1.4 (1.3)<br>1.3 (1.8)  | No               |
| Vigen 2013, p. 1829         | Men who underwent coronary angiography at a VA medical centre            | Mean follow-up: 840 d | TRT, dose NR (1223)<br>No treatment (7486)            | 60.6 (7.6)<br>63.8 (9.0 yr)    | 6.1 (2.2)<br>7.2 (2.6)               | NR               |
| Shores 2012, p. 2050        | > 40 yr treated at a VA medical center                                   | 20.2 (16.7) mo        | TRT, dose NR (398)<br>No treatment (633)              | 62.1 (10.6)                    | 5.6 (2.2)<br>6.7 (1.9)               | No               |
| Rhoden 2006, p. 201         | Hypogonadal men with negative prostate biopsy prior to initiation of TRT | 12 mo                 | IM TRT, dose NR (33)<br>1% ge, dose NR (25)           | 58.3                           | 10.3 (5.4)<br>10.2 (3.1)             | No               |
| Guay 2000, p. 132           | Men with ED and primary or secondary hypogonadism                        | 2-3 mo                | IM TE, 200-300 mg/2-3 wk (25)<br>Patch, 5 mg/d (16)   | 40-80                          | Free T:<br>8.1-9.7 pg/ml             | NR               |
| Hajjar 1997, p. 3793        | Elderly men                                                              | 24 mo                 | IM TE or TC, IM 200 mg/2 wk (45)<br>No treatment (27) | 71.8 (SE 1.7)<br>69.9 (SE 1.9) | 10.8 (4.7)<br>9.6 (3.8)              | NR               |
| <b>Prospective cohort</b>   |                                                                          |                       |                                                       |                                |                                      |                  |
| Francomano 2014, p. 401     | Severely obese men (mean BMI 42) with symptoms of hypogonadism           | 54 wk                 | DPE (12)<br>DPE + IM TU, 1000 mg/12 wk (12)           | 53 (8)<br>56 (9)               | 8.2 (1.8)<br>8.5 (1.8)               | NR               |
| Blick 2013, p. 30           | HIV/AIDS                                                                 | 12 mo                 | Androgel 1%, 50 mg/d (92)<br>Testim 1%, 50 mg/d (75)  | 49.5 (8.1)                     | 13.9 (5.5)<br>13.7 (7.2)             | Yes              |
| Aversa 2012, p. 96          | Middle-aged men with LOH and MetS                                        | 36 mo                 | IM TU, 1000 mg/12 wk (40)<br>No treatment (20)        | 58 (10)<br>57 (8)              | 8.3 (2.4)                            | NR               |
| Dean 2005, p. 87            | Aged 21-81 yr                                                            | Up to 12 mo           | 1% gel, 50 mg/d (NR)<br>1% gel, 100 mg/d (NR)         | 58.5 (10.0)                    | 8.1 (2.1)                            | NR               |
| Wang 2004, p.               | Aged 19-68 yr                                                            | 36 mo                 | 1% gel, 50 mg/d (NR)                                  | 51.5 (0.9)                     | 14.1 (1.3)                           | No               |

Supplemental Online Content: Elliott et al. Testosterone therapy in hypogonadal men: a systematic review and network meta-analysis.

For peer review only - <http://bmjopen.bmj.com/site/about/guidelines.xhtml>

## Elliott Page 18 (Supplement)

| Study                          | Population | Duration | Group<br>(no. in group)                       | Age, yr mean<br>(SD) | Baseline total T,<br>mean (SD),<br>nmol/L* | Industry<br>funding |
|--------------------------------|------------|----------|-----------------------------------------------|----------------------|--------------------------------------------|---------------------|
| 2085 (Swerdloff<br>2003 p.207) |            |          | 1% gel, 75 mg/d (NR)<br>1% gel, 100 mg/d (NR) |                      | 22.4 (2.7)<br>25.6 (2.4)                   |                     |

Note: DPE = diet plus exercise, ED = erectile dysfunction, IHH = idiopathic hypogonadotropic hypogonadism, IM = intramuscular, LOH = late-onset hypogonadism, MetS = metabolic syndrome, NIH = National Institutes of Health, NR = not reported, RCT = randomized controlled trial, SE = standard error, SD = standard deviation, T = testosterone, T2DM = type II diabetes mellitus, TC = testosterone cypionate, TE = testosterone enanthate, TRT = testosterone replacement therapy, VA = Veterans Affairs.

\*Unless otherwise stated.

†Blend of testosterone propionate, testosterone phenylpropionate, testosterone isocaproate, and testosterone decanoate.

**eTable 3: Risk of bias of included randomized controlled trials that reported at least one outcome of interest**

| Author, year          | Adequate sequence generation | Allocation concealment | Blinding of outcome assessment (objective outcomes) | Blinding of outcome assessment (subjective outcomes) | Incomplete outcome data addressed (efficacy outcomes) | Incomplete outcome data addressed (harm outcomes) |
|-----------------------|------------------------------|------------------------|-----------------------------------------------------|------------------------------------------------------|-------------------------------------------------------|---------------------------------------------------|
| Gianatti 2014         | Unclear                      | Low                    | Low                                                 | Low                                                  | Low                                                   | Low                                               |
| Borst 2014            | Low                          | Unclear                | Low                                                 | High                                                 | High                                                  | High                                              |
| Hackett 2013          | Unclear                      | Low                    | Low                                                 | Low                                                  | Low                                                   | Low                                               |
| Wang 2013             | Unclear                      | Unclear                | Low                                                 | NA                                                   | Low                                                   | High                                              |
| Behre 2012            | Low                          | Low                    | Low                                                 | Low                                                  | Low                                                   | High                                              |
| Spitzer 2012          | Unclear                      | Low                    | Low                                                 | Low                                                  | Low                                                   | Low                                               |
| Stout 2012            | Unclear                      | Unclear                | NA                                                  | Low                                                  | High                                                  | High                                              |
| Zhang 2012            | Unclear                      | Low                    | Low                                                 | High                                                 | Low                                                   | Low                                               |
| Ho 2011               | Unclear                      | Low                    | Low                                                 | Low                                                  | Low                                                   | Low                                               |
| Jones 2011            | Unclear                      | Unclear                | Low                                                 | Low                                                  | High                                                  | High                                              |
| Kaufman 2011          | Unclear                      | Low                    | Low                                                 | Low                                                  | High                                                  | Low                                               |
| Sheffield-Moore 2011  | Unclear                      | Low                    | Low                                                 | NA                                                   | Low                                                   | High                                              |
| Shigehara 2011        | Unclear                      | Unclear                | Low                                                 | High                                                 | Low                                                   | Low                                               |
| Aversa 2010, p. 776   | Unclear                      | Unclear                | Low                                                 | Low                                                  | Unclear                                               | Unclear                                           |
| Aversa 2010, p. 3495  | Unclear                      | Unclear                | Low                                                 | Low                                                  | Low                                                   | Low                                               |
| Basaria 2010          | Low                          | Low                    | Low                                                 | Low                                                  | Low                                                   | Unclear                                           |
| Kalinchenko 2010      | Unclear                      | Low                    | Low                                                 | Low                                                  | Low                                                   | Low                                               |
| Kenny 2010            | Unclear                      | Low                    | Low                                                 | Low                                                  | High                                                  | Unclear                                           |
| Srinivas-Shankar 2010 | Low                          | Low                    | Low                                                 | Low                                                  | Low                                                   | Unclear                                           |
| Caminiti 2009         | Unclear                      | Low                    | Low                                                 | Low                                                  | Low                                                   | Low                                               |
| Chiang 2009           | Unclear                      | Unclear                | Low                                                 | Low                                                  | High                                                  | High                                              |
| Emmelot-Vonk 2009     | Low                          | Low                    | Low                                                 | Low                                                  | Low                                                   | Low                                               |
| Heufelder 2009        | Low                          | Unclear                | Low                                                 | High                                                 | Low                                                   | Low                                               |
| Hohl 2009             | High                         | High                   | Low                                                 | High                                                 | Low                                                   | Low                                               |
| Mathur 2009           | Low                          | Unclear                | Low                                                 | Low                                                  | Low                                                   | High                                              |
| Morales 2009          | Low                          | Low                    | Low                                                 | Low                                                  | Low                                                   | Low                                               |
| Shores 2009           | Low                          | Low                    | Low                                                 | Low                                                  | High                                                  | Unclear                                           |
| Agledahl 2008         | Unclear                      | Unclear                | Low                                                 | NA                                                   | Low                                                   | Low                                               |

Supplemental Online Content: Elliott et al. Testosterone therapy in hypogonadal men: a systematic review and network meta-analysis.

|                                  |         |         |         |         |         |         |
|----------------------------------|---------|---------|---------|---------|---------|---------|
| <b>Basurto 2008</b>              | Low     | Low     | Low     | Low     | Low     | Unclear |
| <b>Raynaud 2008</b>              | Unclear | Unclear | Low     | High    | High    | High    |
| <b>Svartberg 2008</b>            | Unclear | Unclear | Low     | Low     | Low     | Unclear |
| <b>Chiang 2007</b>               | Unclear | Unclear | Low     | Unclear | High    | Low     |
| <b>Brockenbrough 2006</b>        | Unclear | Low     | Low     | Unclear | High    | Low     |
| <b>Marks 2006</b>                | Unclear | Unclear | Low     | Low     | Low     | Low     |
| <b>Merza 2005</b>                | Unclear | Unclear | Low     | Unclear | Low     | Low     |
| <b>Kuhnert 2005</b>              | Unclear | Low     | Low     | High    | High    | High    |
| <b>Orengo 2005</b>               | Low     | Unclear | Low     | Unclear | High    | High    |
| <b>Amory 2004</b>                | Low     | Low     | Low     | Low     | Unclear | Unclear |
| <b>Cavallini 2004</b>            | Unclear | Unclear | Low     | Unclear | Unclear | High    |
| <b>Schubert 2004</b>             | Low     | Unclear | Low     | High    | Unclear | Low     |
| <b>Shabsigh 2004</b>             | Low     | Unclear | Low     | Low     | Low     | Unclear |
| <b>Boyanov 2003</b>              | Unclear | Unclear | Low     | High    | Low     | Low     |
| <b>McNicholas 2003</b>           | Unclear | Unclear | Low     | High    | High    | High    |
| <b>Steidle 2003</b>              | Unclear | Unclear | Low     | High    | High    | High    |
| <b>Tan 2003</b>                  | Unclear | Unclear | Unclear | High    | Low     | Low     |
| <b>Ferrando 2002</b>             | Unclear | Unclear | Low     | NA      | Low     | Low     |
| <b>Kang 2002</b>                 | Unclear | Unclear | Low     | NA      | Low     | Low     |
| <b>Simon 2001</b>                | Unclear | Unclear | Low     | Low     | NA      | Low     |
| <b>Bhasin 2000</b>               | Low     | Unclear | Low     | Unclear | Low     | Unclear |
| <b>Wang 2000</b>                 | Unclear | Unclear | Low     | High    | High    | High    |
| <b>Clague 1999</b>               | Unclear | Unclear | Low     | NA      | Low     | Low     |
| <b>Dobs 1999</b>                 | Unclear | Low     | Low     | High    | High    | Unclear |
| <b>Bhasin 1998</b>               | Unclear | Unclear | Low     | Unclear | High    | Unclear |
| <b>Grinspoon 1998</b>            | Low     | Low     | Low     | Low     | High    | Unclear |
| <b>Jockenhovel 1997, p. 2510</b> | Unclear | Unclear | Low     | NA      | Unclear | Unclear |
| <b>Jockenhovel 1997, p. 293</b>  | Unclear | Unclear | Low     | NA      | Low     | Unclear |
| <b>Sih 1997</b>                  | Low     | Unclear | Low     | Unclear | High    | Unclear |

Note: Risk of bias was not assessed for the studies that reported no outcomes of interest or that did not provide usable data (e.g., cross-over studies without first period data reported separately).

**eTable 4: SIGN50 assessment of included non-randomized studies that reported at least one outcome of interest**

| Study*                 | Overall assessment† | Comments                                                                                                                                                                                                                                                                                                                                                                                                      |
|------------------------|---------------------|---------------------------------------------------------------------------------------------------------------------------------------------------------------------------------------------------------------------------------------------------------------------------------------------------------------------------------------------------------------------------------------------------------------|
| <b>Francomano 2014</b> | Unacceptable (–)    | Prospective cohort. Obese men with low testosterone. Baseline characteristics were well matched on reported characteristics, but control group had contraindications to TRT. 33% dropout in treatment group, zero in control group; no comparison between those who dropped out or remained in study.                                                                                                         |
| <b>Aydogdu 2013</b>    | Acceptable (+)      | Retrospective cohort. Men with IHH. SAE not defined as an outcome but reported that no SAEs were detected for any treatment group.                                                                                                                                                                                                                                                                            |
| <b>Blick 2013</b>      | Acceptable (+)      | Prospective cohort. Groups were generally well matched on baseline characteristics with no statistically significant differences (except for study site). Patients in the 2 treatment groups were not followed for an equal length of time (Androgel: mean 6.1 yr; Testim: mean 1.9 yr). Skin reactions assessed but not reported. Outcome assessment was not blinded to exposure status.                     |
| <b>Vigen 2013</b>      | Acceptable (+)      | Retrospective cohort. All-cause mortality assessed via the Veterans Affairs vital status file. Myocardial infarction and ischemic stroke assessed via ICD-9 codes from Veterans Affairs inpatient treatment files. Conclusions based on a composite outcome. Sufficient data not reported to allow analysis of stroke or MI separately at each time point. Outcome assessment not blinded to exposure status. |
| <b>Aversa 2012</b>     | Unacceptable (–)    | Prospective cohort. Men with multiple sclerosis and late onset hypogonadism. Baseline characteristics were well matched but the control group comprised of men who had refused or had contraindications to testosterone. Adherence to treatment over 3 years was 50% in TU group. Those discontinuing TU but remaining in study for follow up were not included in efficacy analysis.                         |
| <b>Shores 2012</b>     | Acceptable (+)      | Retrospective cohort. Hazard ratio for mortality takes person-years of observation into account. Adjusted HR and CIs provided (adjusted for age, site, hospitalization in the past year, diabetes, coronary artery disease). Outcome assessment not blinded to exposure status. Exposure determined via Veterans Affairs pharmacy records and outcomes ascertained from 2 mortality databases.                |
| <b>Rhoden 2006</b>     | Acceptable (+)      | Retrospective cohort. Patients had to have negative prostate biopsy before initiation of TRT, thus excluding any men with pre-existing large volume disease. Type and dose of IM testosterone not reported. Dose of gel not reported (data NR by type). Outcome assessment not blinded to exposure status.                                                                                                    |
| <b>Dean 2005</b>       | Unacceptable (–)    | Prospective cohort. Poor reporting of the number of patients in each group and which group the safety events occurred in. Number of and reasons for withdrawals not reported. Safety data reported overall but not by treatment group. Outcome assessment not blinded to exposure status.                                                                                                                     |
| <b>Wang 2004</b>       | Unacceptable (–)    | Prospective cohort (open-label extension of an RCT). The number of men assigned to each group NR. Safety data poorly reported: 3 cases of prostate cancer reported but number of people in each group not reported. Outcome assessment not blinded to exposure status.                                                                                                                                        |
| <b>Guay 2000</b>       | Unacceptable (–)    | Retrospective cohort. Safety data not reported by treatment group. Outcome                                                                                                                                                                                                                                                                                                                                    |

Supplemental Online Content: Elliott et al. Testosterone therapy in hypogonadal men: a systematic review and network meta-analysis.

| Study*      | Overall assessment† | Comments                                                                                                                                                                                                                                                                                     |
|-------------|---------------------|----------------------------------------------------------------------------------------------------------------------------------------------------------------------------------------------------------------------------------------------------------------------------------------------|
| Hajjar 1997 | Unacceptable (-)    | assessment not blinded to exposure status.<br>Retrospective cohort. Data not clearly provided. Safety outcomes were reported based on a subset of people assigned to each group, and it is not clear why the other patients were omitted. Outcome assessment not blinded to exposure status. |

Note: CI = confidence interval, ICD = International Classification of Diseases, Ninth Revision, IHH = idiopathic hypogonadotropic hypogonadism, HR = hazard ratio, MI = myocardial infarction, NR = not reported, RCT = randomized controlled trial, SAE = serious adverse events, TRT = testosterone replacement therapy, TU = testosterone undecanoate.

\*Non-randomized studies that reported at least 1 outcome of interest.

†Assessed by use of SIGN50 for cohort studies.

Or peer review only



1  
2  
3  
4  
5  
6  
7  
8  
9  
10  
11  
12  
13  
14  
15  
16  
17  
18  
19  
20  
21  
22  
23  
24  
25  
26  
27  
28  
29  
30  
31  
32  
33  
34  
35  
36  
37  
38  
39  
40  
41  
42  
43  
44  
45  
46  
47  
48  
49  
50  
51  
52  
53  
54  
55  
56  
57  
58  
59  
60

eAppendix 4: Evidence networks

eFigure 1A) Depression

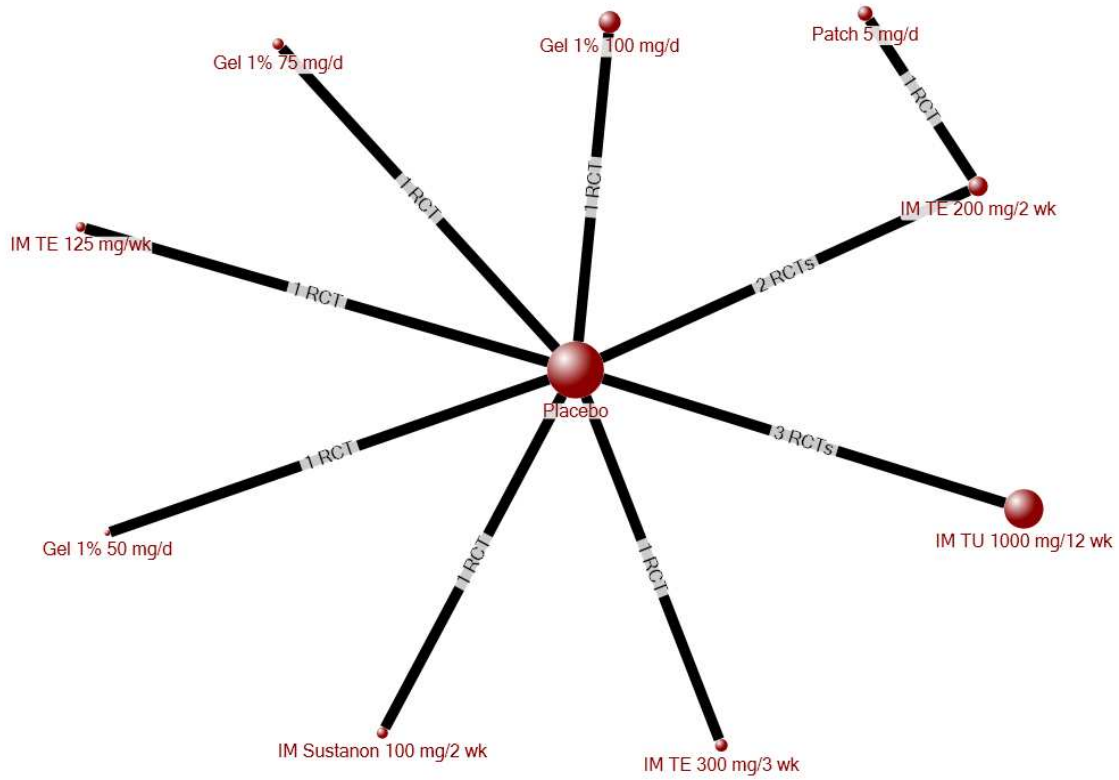

For peer review only

B) Libido

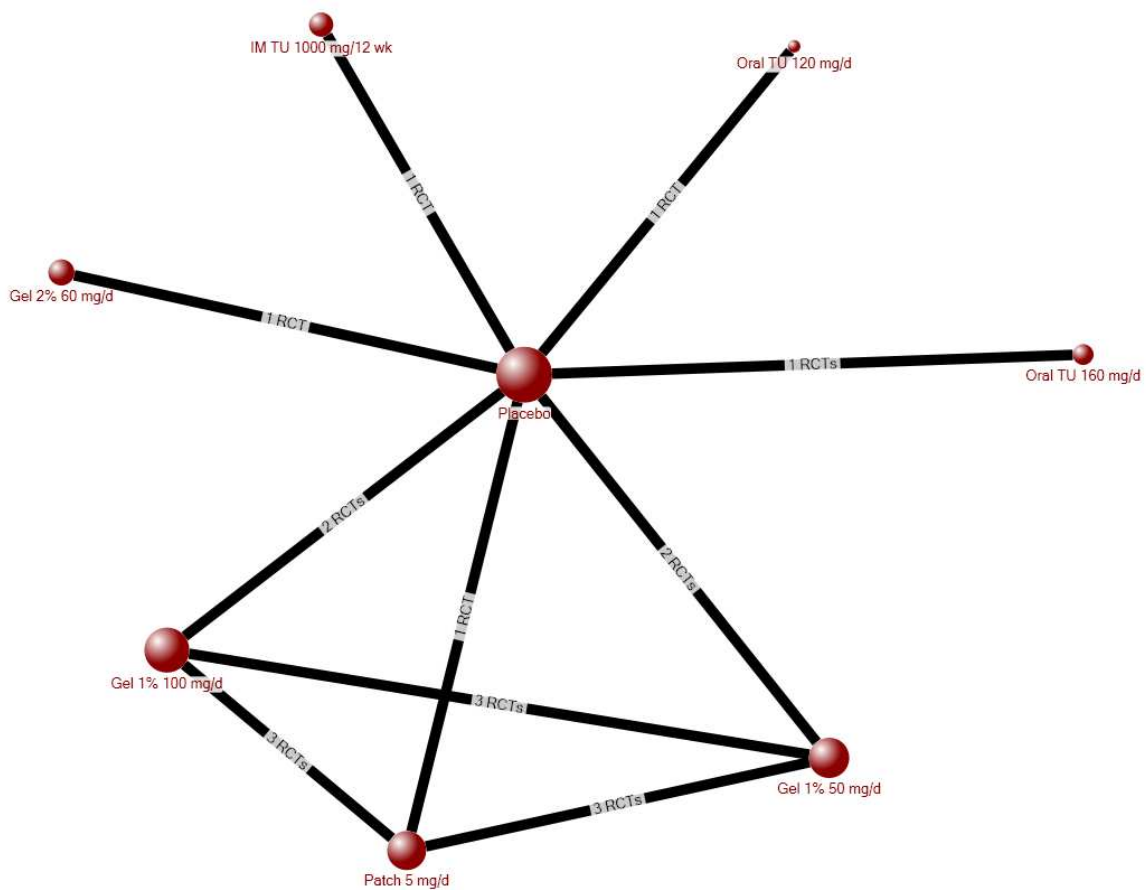

For peer review only

1  
2  
3  
4  
5  
6  
7  
8  
9  
10  
11  
12  
13  
14  
15  
16  
17  
18  
19  
20  
21  
22  
23  
24  
25  
26  
27  
28  
29  
30  
31  
32  
33  
34  
35  
36  
37  
38  
39  
40  
41  
42  
43  
44  
45  
46  
47  
48  
49  
50  
51  
52  
53  
54  
55  
56  
57  
58  
59  
60

1  
2  
3  
4  
5  
6  
7  
8  
9  
10  
11  
12  
13  
14  
15  
16  
17  
18  
19  
20  
21  
22  
23  
24  
25  
26  
27  
28  
29  
30  
31  
32  
33  
34  
35  
36  
37  
38  
39  
40  
41  
42  
43  
44  
45  
46  
47  
48  
49  
50  
51  
52  
53  
54  
55  
56  
57  
58  
59  
60

C) Erectile function

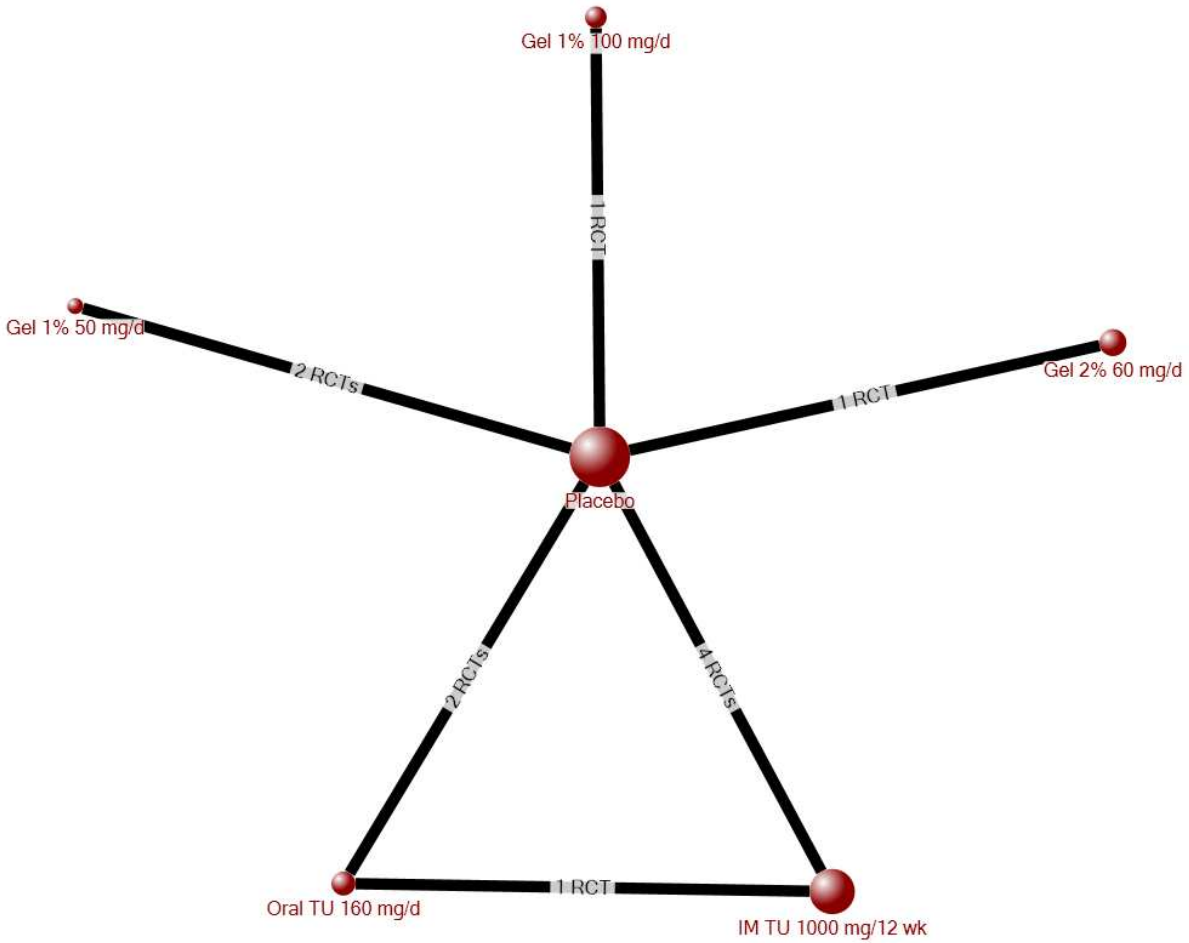

only

D) Total serum testosterone, end of study

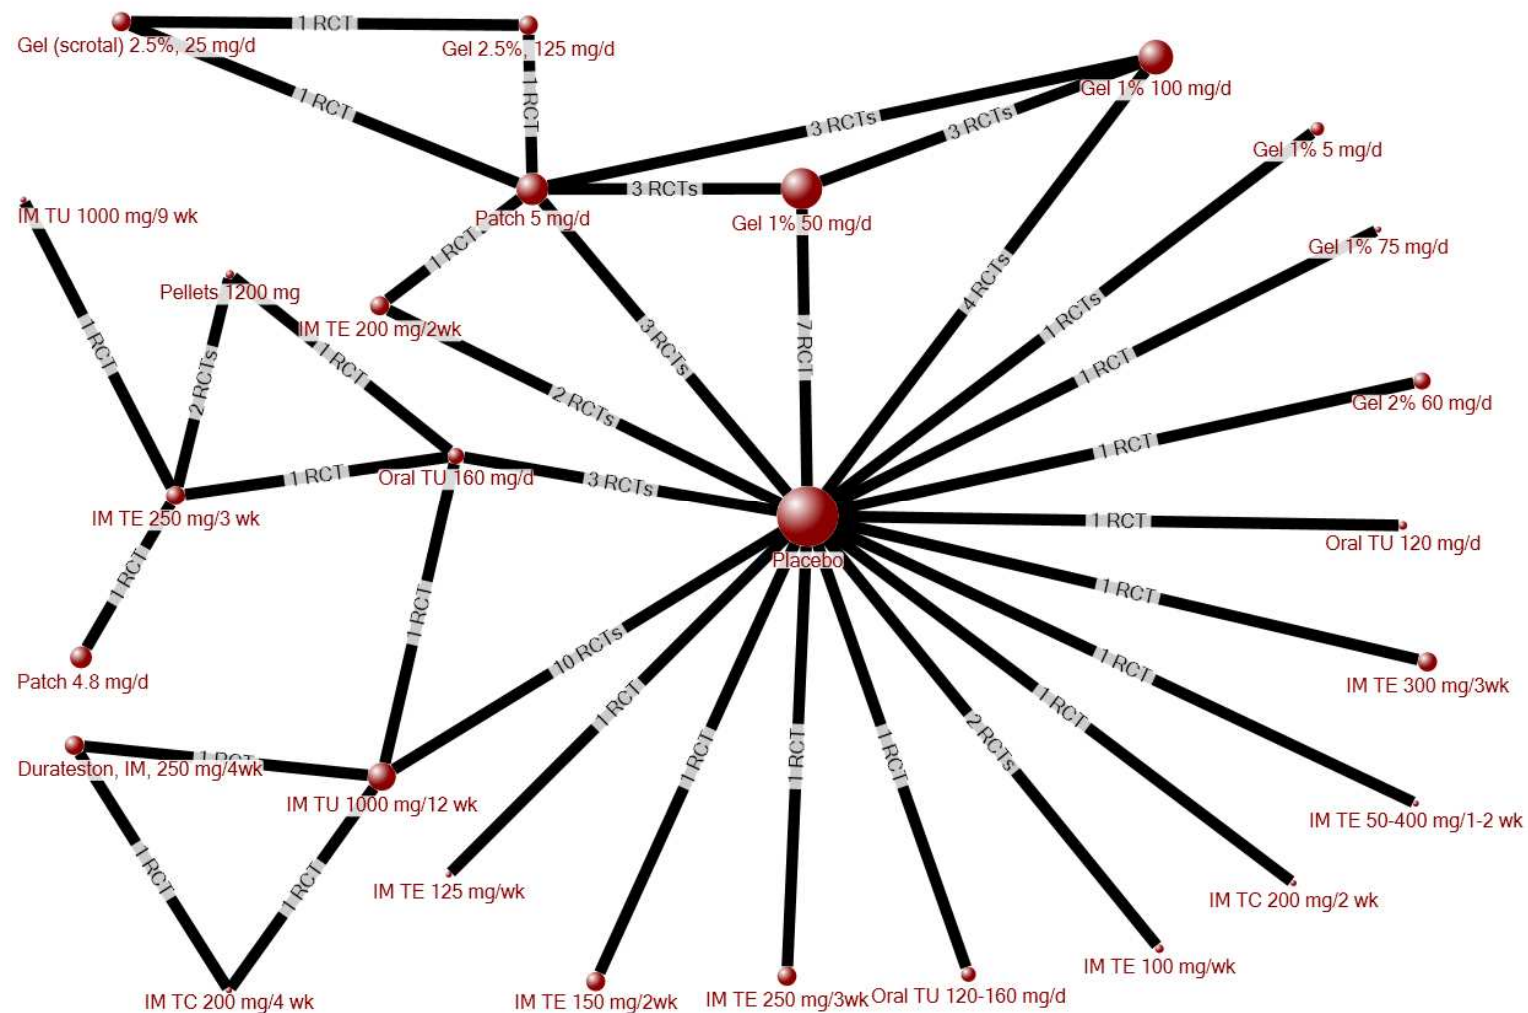

Supplemental Online Content: Elliott et al. Testosterone therapy in hypogonadal men: a systematic review and network meta-analysis.

For peer review only - <http://bmjopen.bmj.com/site/about/guidelines.xhtml>

1  
2  
3  
4  
5  
6  
7  
8  
9  
10  
11  
12  
13  
14  
15  
16  
17  
18  
19  
20  
21  
22  
23  
24  
25  
26  
27  
28  
29  
30  
31  
32  
33  
34  
35  
36  
37  
38  
39  
40  
41  
42  
43  
44  
45  
46  
47  
48  
49  
50  
51  
52  
53  
54  
55  
56  
57  
58  
59  
60

E) Cardiovascular death

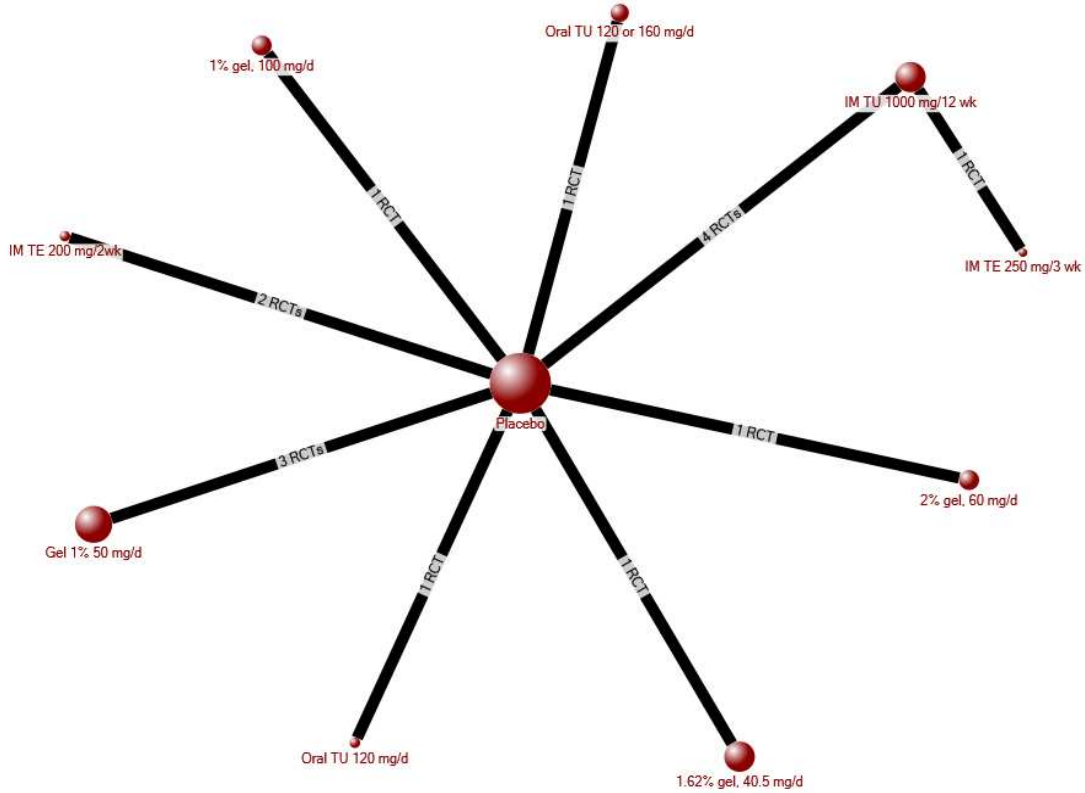

view only

F) Myocardial infarction

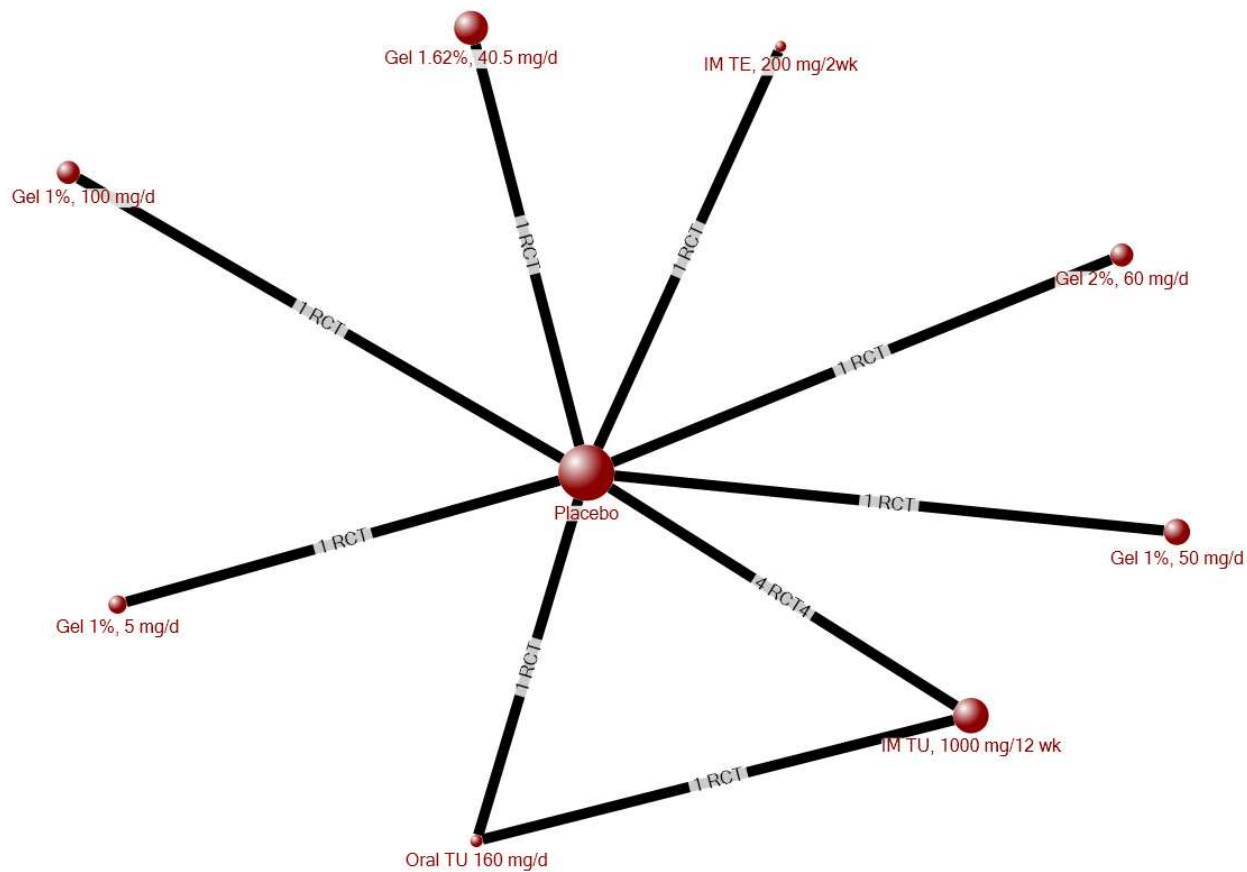

ew only

1  
2  
3  
4  
5  
6  
7  
8  
9  
10  
11  
12  
13  
14  
15  
16  
17  
18  
19  
20  
21  
22  
23  
24  
25  
26  
27  
28  
29  
30  
31  
32  
33  
34  
35  
36  
37  
38  
39  
40  
41  
42  
43  
44  
45  
46  
47  
48  
49  
50  
51  
52  
53  
54  
55  
56  
57  
58  
59  
60

1  
2  
3  
4  
5  
6  
7  
8  
9  
10  
11  
12  
13  
14  
15  
16  
17  
18  
19  
20  
21  
22  
23  
24  
25  
26  
27  
28  
29  
30  
31  
32  
33  
34  
35  
36  
37  
38  
39  
40  
41  
42  
43  
44  
45  
46  
47  
48  
49  
50  
51  
52  
53  
54  
55  
56  
57  
58  
59  
60

G) Prostate cancer

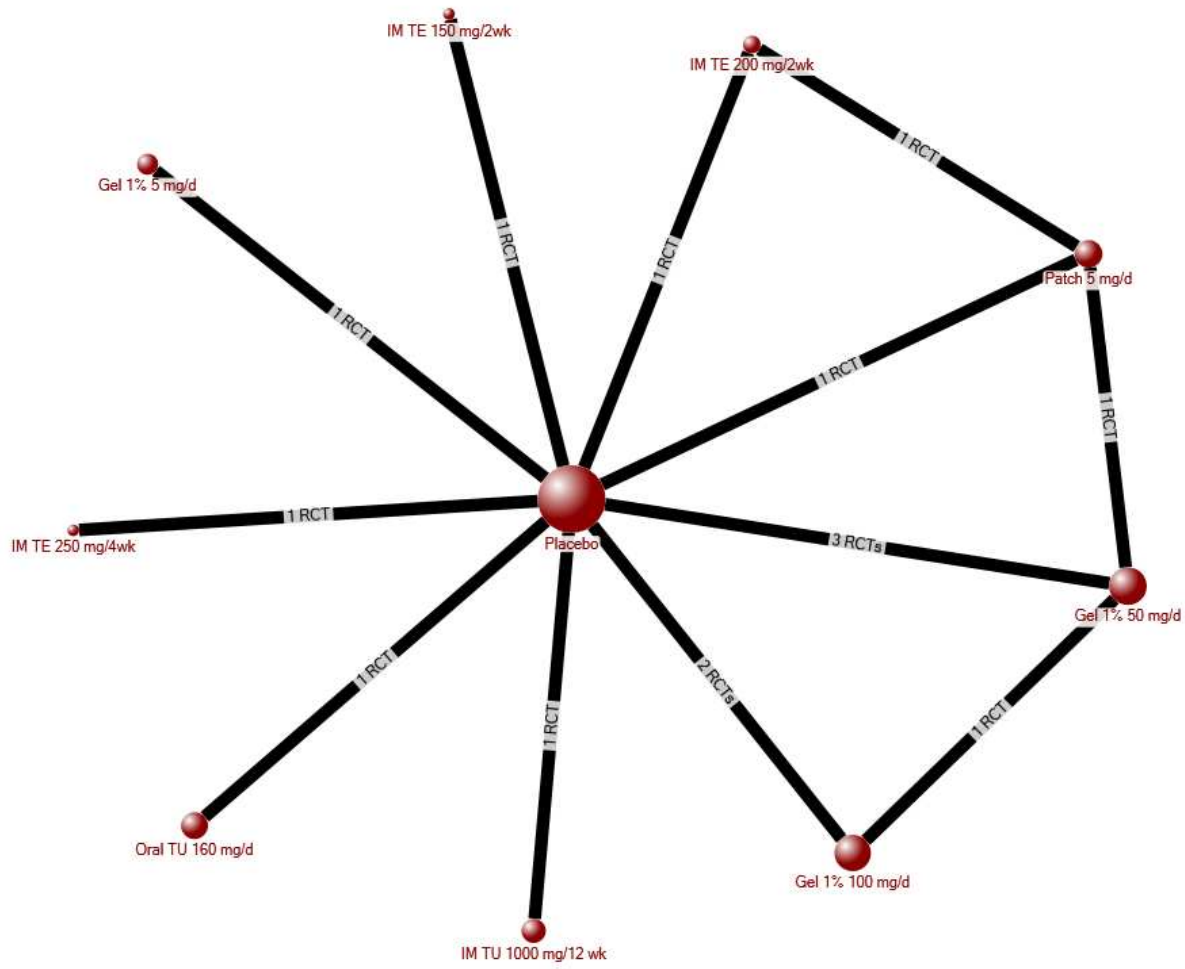

For peer review only

H) Serious adverse events

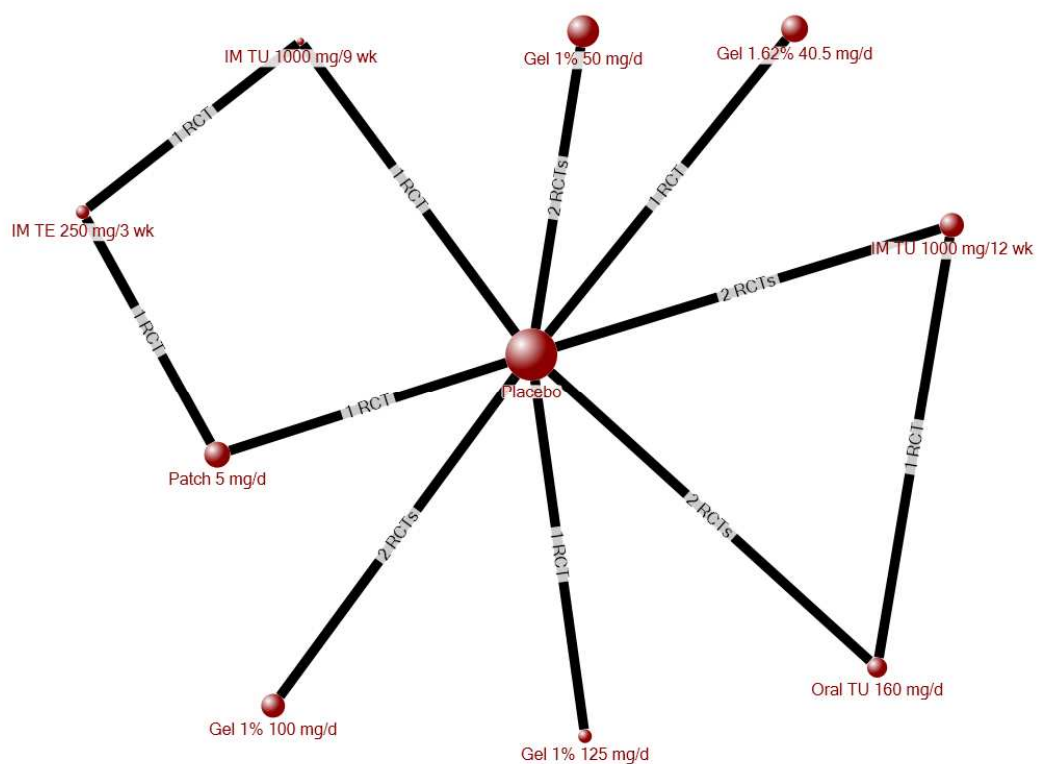

ew only

1  
2  
3  
4  
5  
6  
7  
8  
9  
10  
11  
12  
13  
14  
15  
16  
17  
18  
19  
20  
21  
22  
23  
24  
25  
26  
27  
28  
29  
30  
31  
32  
33  
34  
35  
36  
37  
38  
39  
40  
41  
42  
43  
44  
45  
46  
47  
48  
49  
50  
51  
52  
53  
54  
55  
56  
57  
58  
59  
60



I) Withdrawals due to adverse events

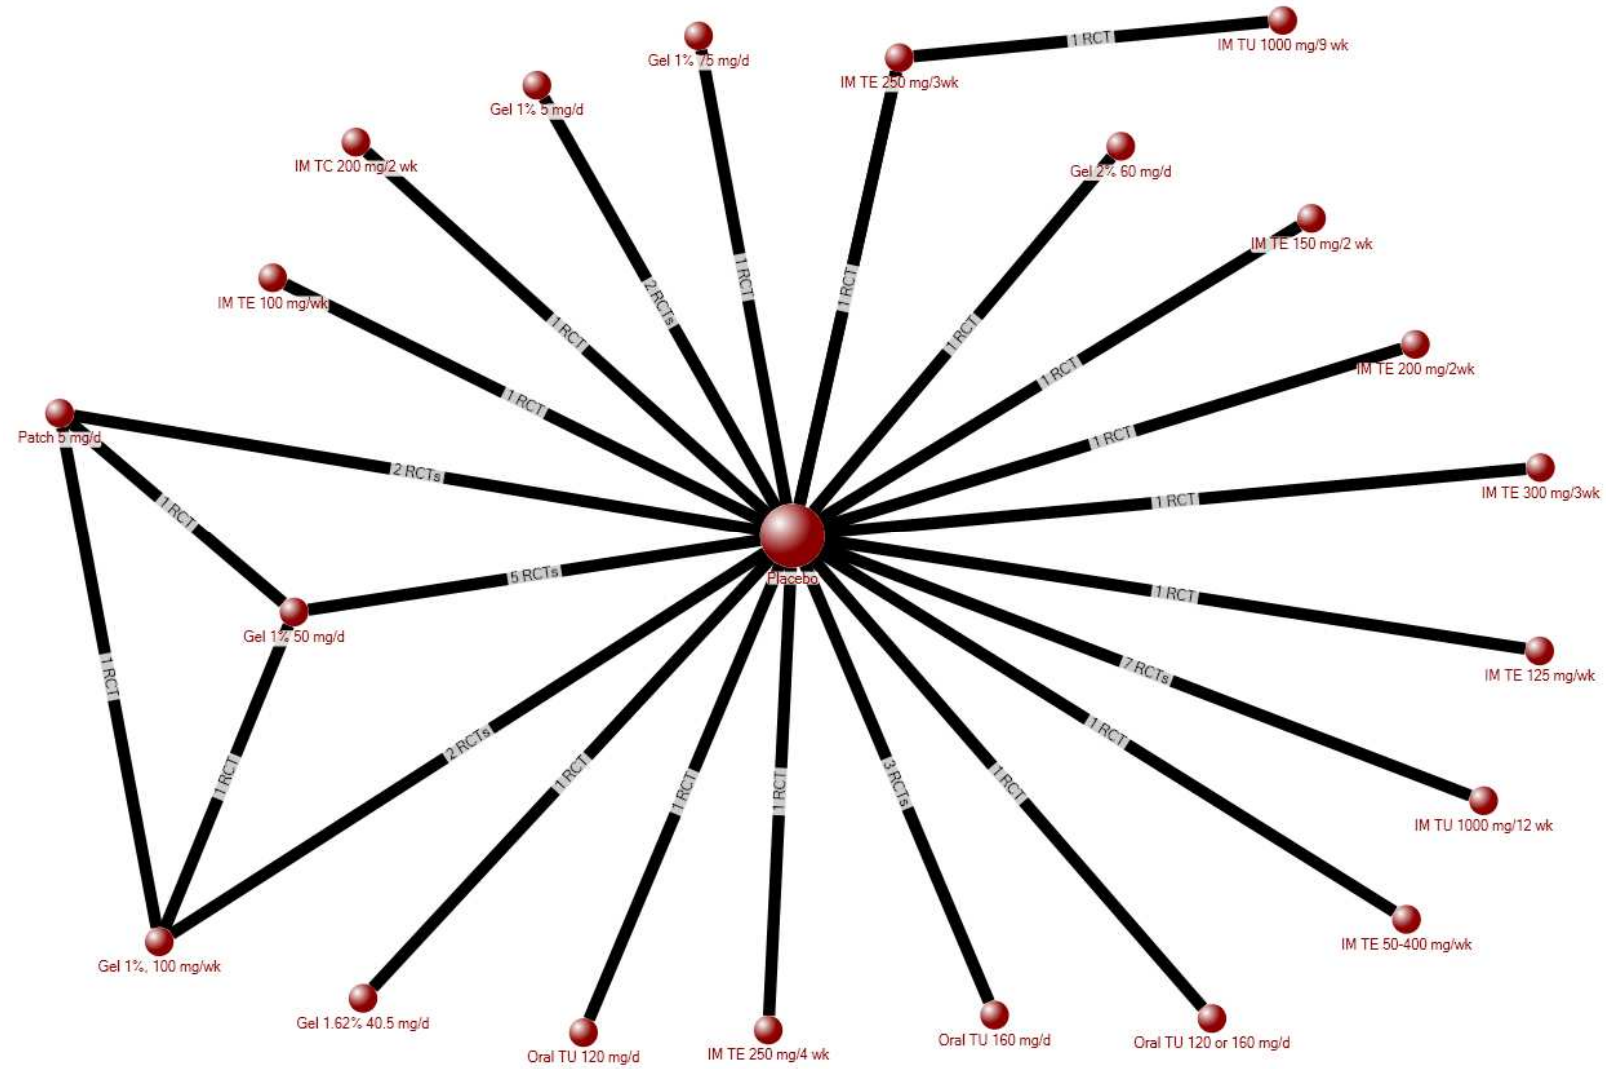

Supplemental Online Content: Elliott et al. Testosterone therapy in hypogonadal men: a systematic review and network meta-analysis.

For peer review only - <http://bmjopen.bmj.com/site/about/guidelines.xhtml>

1  
2  
3  
4  
5  
6  
7  
8  
9  
10  
11  
12  
13  
14  
15  
16  
17  
18  
19  
20  
21  
22  
23  
24  
25  
26  
27  
28  
29  
30  
31  
32  
33  
34  
35  
36  
37  
38  
39  
40  
41  
42  
43  
44  
45  
46  
47  
48  
49

## eAppendix 5: Evaluation of network consistency

We evaluated the consistency of networks with closed loops. To be classified as a “closed loop,” at least 2 nodes had to be connected by more than one trial (e.g., not connected solely by a multi-arm trial).

To evaluate the consistency of networks with closed loops, two analyses were performed. One was conducted using the standard consistency model, which assumes that the data in the network are consistent. A second analysis was performed using an inconsistency model, which assumes that the data in the network are not consistent. The posterior mean deviance of the individual data points derived from the inconsistency model was plotted against the posterior mean deviance derived from the consistency model. If inconsistency is present, data points will lie under the diagonal line, indicating deviation from the consistency model. Data points above the diagonal line indicate deviation from the inconsistency model and are not indicative of inconsistency.

Model fit was also evaluated by considering the residual deviance and deviance information criterion (DIC) of the inconsistency and consistency models, with the model that has the lower residual deviance and DIC representing the better fit for the data. For each network, the consistency model had a lower residual deviance and DIC for each outcome, representing better model fit.

### LIBIDO: BASE CASE (ALL STUDIES)

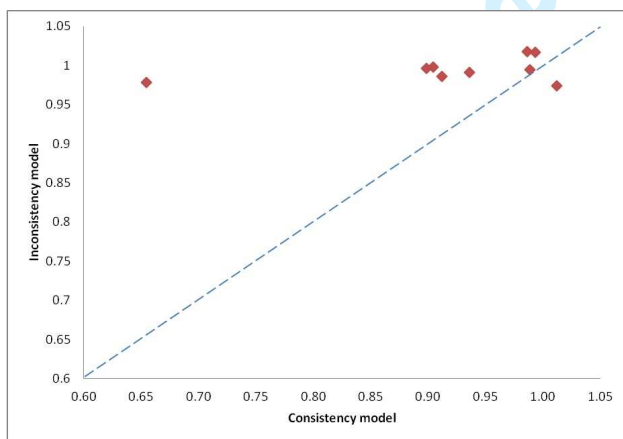

### TOTAL TESTOSTERONE LEVEL, 3 MO

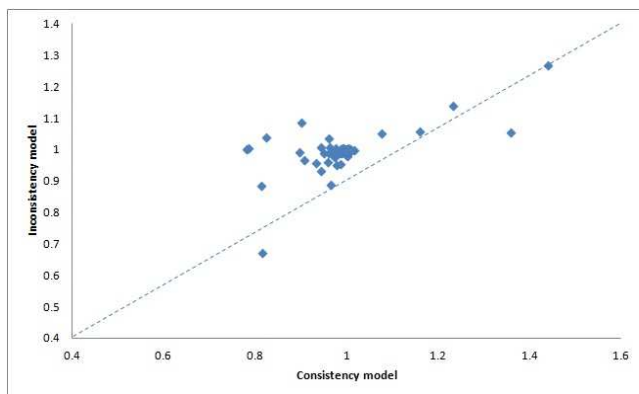

Supplemental Online Content: Elliott et al. Testosterone therapy in hypogonadal men: a systematic review and network meta-analysis.

1  
2  
3  
4  
5  
6  
7  
8  
9  
10  
11  
12  
13  
14  
15  
16  
17  
18  
19  
20  
21  
22  
23  
24  
25  
26  
27  
28  
29  
30  
31  
32  
33  
34  
35  
36  
37  
38  
39  
40  
41  
42  
43  
44  
45  
46  
47  
48  
49  
50  
51  
52  
53  
54  
55  
56  
57  
58  
59  
60

**TOTAL TESTOSTERONE LEVEL, 6 MO**

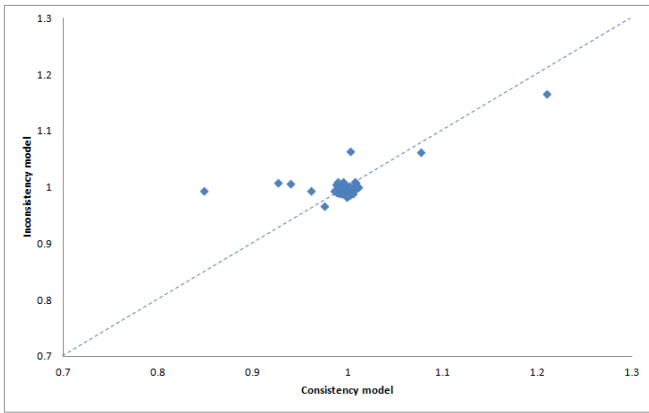

**TOTAL TESTOSTERONE LEVEL, END OF STUDY**

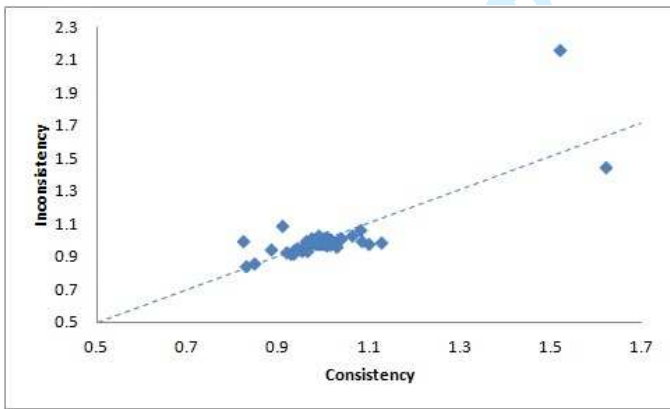

Review only

## eAppendix 6: Pair-wise meta-analyses and network meta-analyses

**Note:** The indirect comparison staircase diagrams (Bayesian network meta-analyses) are read by comparing the row treatment against the column treatment. Green indicates a significantly better outcome and red indicates a statistically worse outcome for the row treatment relative to the column treatment. Results are reported for random-effects models.

### Summary of network characteristics

| Outcome                    | No. of trials        | No. of treatments*         | No. of comparison†          | No. of participants        | Treatment duration        |
|----------------------------|----------------------|----------------------------|-----------------------------|----------------------------|---------------------------|
| <b>Benefits</b>            |                      |                            |                             |                            |                           |
| Quality of life            | 20                   | 13                         | 24                          | 2698                       | 12 wk to 1 yr             |
| Depression                 | 11                   | 9                          | 11                          | 842                        | 12 wk to 36 mo‡           |
| Libido                     | 9                    | 7                          | 18                          | 1546                       | 12 wk to 1 yr             |
| Erectile function          | 10                   | 5                          | 12                          | 1053                       | 12 wk to 1 yr             |
| Activities of daily living | 0                    | —                          | —                           | —                          | —                         |
| <b>Harms</b>               |                      |                            |                             |                            |                           |
| Cardiovascular death       | 15                   | 9                          | 15                          | 2089                       | 12 wk to 36 mo‡           |
| Myocardial infarction      | 11                   | 8                          | 13                          | 1638                       | 6 to 36 mo§               |
| Prostate cancer            | 11                   | 9                          | 16                          | 2024                       | 24 wk to 36 mo§           |
| Serious AEs                | 14                   | 9                          | 16                          | 2260                       | 12 to 42 wk               |
| Withdrawals due to AEs     | 41                   | 21                         | 43                          | 3908                       | 12 wk to 36 mo§           |
| <b>Meta-analysis¶</b>      | <b>No. of trials</b> | <b>Odds ratio (95% CI)</b> | <b><i>I</i><sup>2</sup></b> | <b>No. of participants</b> | <b>Treatment duration</b> |
| Stroke                     | 4                    | 0.50<br>(0.05, 4.85)       | 25%                         | 329                        | 5 to 36 mo‡               |
| Diabetes                   | 0                    | —                          | —                           | —                          | —                         |
| Heart disease              | 3                    | 0.89<br>(0.24 to 3.26)     | 0%                          | 251                        | 40 wk to 12 mo            |
| Erythrocytosis             | 3                    | 2.44<br>(0.26, 22.53)      | 0%                          | 104                        | 6 to 12 mo                |

Note: AE = adverse event, IM = intramuscular, TE = testosterone enanthate, TU = testosterone undecanoate, T = testosterone, TRT = testosterone replacement therapy

\*In addition to placebo

†Direct comparisons based on the number of 2-, 3-, and 4-arm trials.

‡One study with a treatment duration longer than 12 mo.

§Two trials with a treatment duration longer than 12 mo.

¶Insufficient data for stroke, diabetes, heart disease, and erythrocytosis were available for analysis by network meta-analysis.

Supplemental Online Content: Elliott et al. Testosterone therapy in hypogonadal men: a systematic review and network meta-analysis.

## eFigure2: Individual trial results, depression

### A) All trials

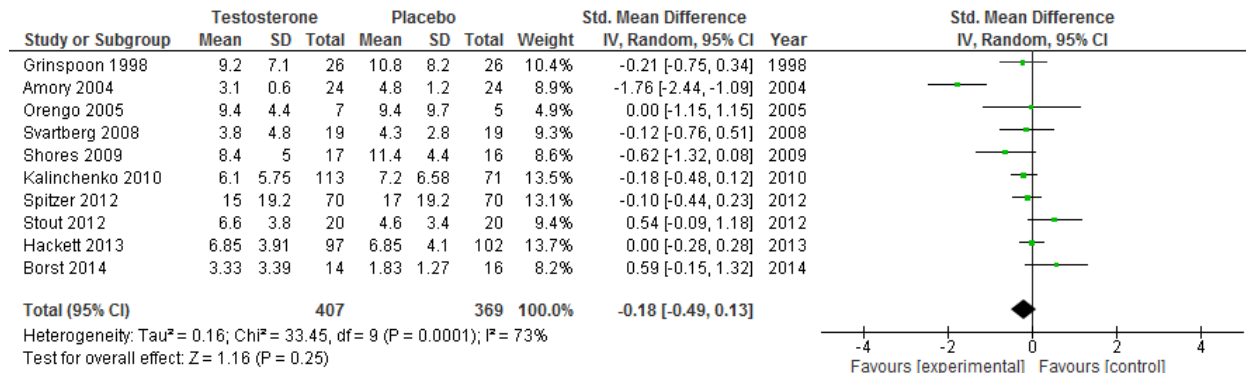

### B) Trials involving men without major comorbidities

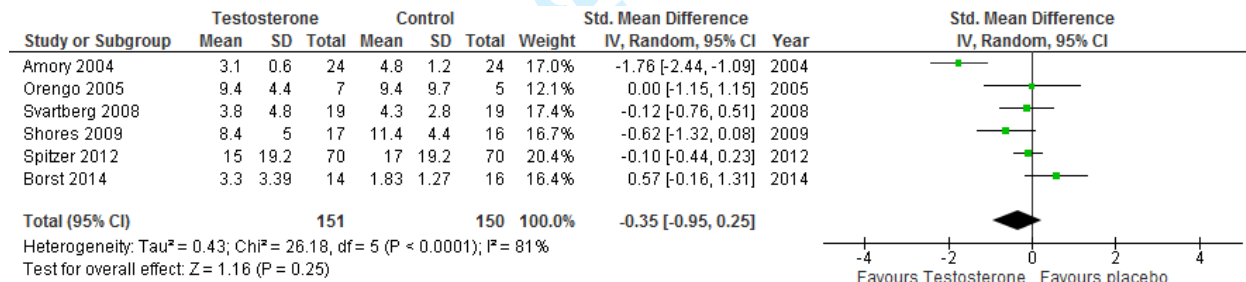

eTable 5: Depression at end of treatment – Bayesian network meta-analysis

|                                 | Standardized mean difference (standard deviation) |                  |                    |                    |                        |                            |                         |                           |                           |                                    |
|---------------------------------|---------------------------------------------------|------------------|--------------------|--------------------|------------------------|----------------------------|-------------------------|---------------------------|---------------------------|------------------------------------|
|                                 | Placebo                                           | Patch,<br>5 mg/d | Gel 1%,<br>50 mg/d | Gel 1%,<br>75 mg/d | Gel 1%,<br>100<br>mg/d | IM TU,<br>1000<br>mg/12 wk | IM TE,<br>125 mg/<br>wk | IM TE,<br>200 mg/<br>3 wk | IM TE,<br>300 mg/<br>3 wk | IM<br>Sustanon,<br>100 mg/<br>2 wk |
| Patch,<br>5 mg/d                | -1.98<br>(1.22)                                   | —                |                    |                    |                        |                            |                         |                           |                           |                                    |
| Gel 1%,<br>50 mg/d              | -0.02<br>(1.00)                                   | 1.97<br>(1.58)   | —                  |                    |                        |                            |                         |                           |                           |                                    |
| Gel 1%,<br>75 mg/d              | -0.62<br>(0.89)                                   | 1.36<br>(1.52)   | -0.60<br>(1.33)    | —                  |                        |                            |                         |                           |                           |                                    |
| Gel 1%,<br>100 mg/d             | -0.10<br>(0.82)                                   | 1.88<br>(1.49)   | -0.09<br>(1.28)    | 0.52<br>(1.20)     | —                      |                            |                         |                           |                           |                                    |
| IM TU, 1000<br>mg/12 wk         | -0.10<br>(0.49)                                   | 1.89<br>(1.31)   | -0.08<br>(1.10)    | 0.52<br>(1.01)     | 0.01<br>(0.96)         | —                          |                         |                           |                           |                                    |
| IM TE 125<br>mg/wk              | 0.60<br>(0.89)                                    | 2.58<br>(1.51)   | 0.61<br>(1.34)     | 1.22<br>(1.27)     | 0.70<br>(1.21)         | 0.69<br>(1.00)             | —                       |                           |                           |                                    |
| IM TE,<br>200 mg/2 wk           | <b>-1.78</b><br>(0.88)                            | 0.20<br>(0.86)   | -1.76<br>(1.34)    | -1.16<br>(1.26)    | -1.68<br>(1.20)        | -1.68<br>(1.01)            | <b>-2.38</b><br>(1.25)  | —                         |                           |                                    |
| IM TE,<br>300 mg/3 wk           | -0.21<br>(0.87)                                   | 1.78<br>(1.51)   | -0.19<br>(1.33)    | 0.41<br>(1.25)     | -0.10<br>(1.19)        | -0.11<br>(1.00)            | -0.80<br>(1.25)         | 1.57<br>(1.24)            | —                         |                                    |
| IM Sustanon,<br>100 mg/2<br>wk† | 0.55<br>(0.87)                                    | 2.53<br>(1.50)   | 0.56<br>(1.32)     | 1.17<br>(1.26)     | 0.65<br>(1.20)         | 0.64<br>(0.99)             | -0.05<br>(1.24)         | <b>2.33</b><br>(1.24)     | 0.75<br>(1.24)            | —                                  |

Note: IM = intramuscular, TE = testosterone enanthate, TU = testosterone undecanoate.  
 \*Oral TU dose was based on testosterone levels at baseline. Patients with total testosterone < 8 nmol/L received 120 mg/d; patients with testosterone between 8 and 12 nmol/L received 160 mg/d (data not reported by dose)  
 †Blend of testosterone propionate, testosterone phenylpropionate, testosterone isocaproate, and testosterone decanoate.  
 Note: a negative SMD indicates improvement in depression. Significant changes are indicated by use of bold and colour (green indicates that the row treatment is significantly better than the column treatment, which red indicates that the row treatment is significantly worse than the column treatment).

## eFigure3: Individual trial results, libido

## A) All trials

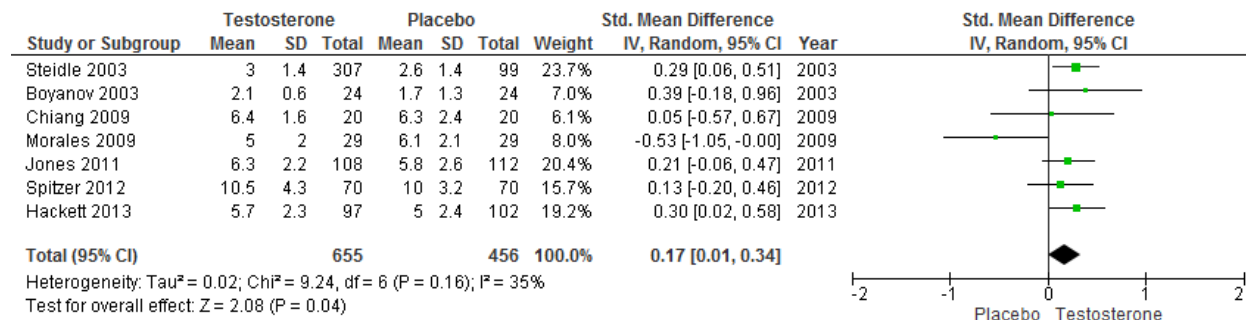

## B) Trials involving men with no major comorbidities

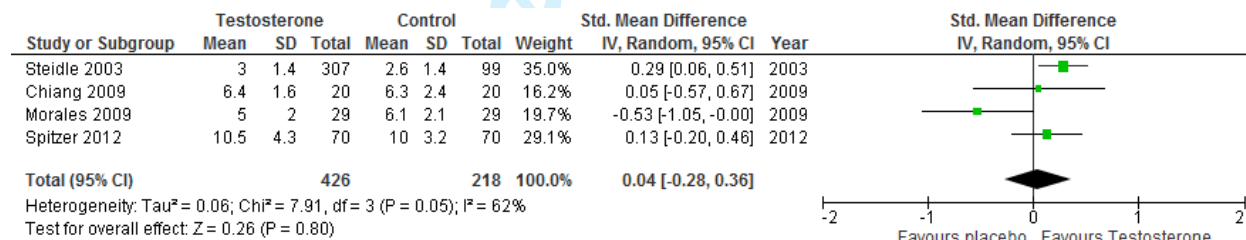

eTable6: Libido at end of treatment – Bayesian network meta-analysis

| Treatment               | Standardized mean difference (standard deviation) |                  |                    |                               |                    |                               |                      |                             |
|-------------------------|---------------------------------------------------|------------------|--------------------|-------------------------------|--------------------|-------------------------------|----------------------|-----------------------------|
|                         | Placebo                                           | Patch,<br>5 mg/d | Gel 1%,<br>50 mg/d | Gel 1%,<br>100 mg/d           | Gel 2%,<br>60 mg/d | Oral TU,<br>120 mg/d          | Oral, TU<br>160 mg/d | IM TU,<br>1000 mg/<br>12 wk |
| Patch,<br>5 mg/d        | 0.05<br>(0.16)                                    | —                |                    |                               |                    |                               |                      |                             |
| Gel 1%,<br>50 mg/d      | 0.11<br>(0.15)                                    | 0.06<br>(0.13)   | —                  |                               |                    |                               |                      |                             |
| Gel 1%,<br>100 mg/d     | 0.32<br>(0.14)                                    | 0.27<br>(0.13)   | 0.21<br>(0.12)     | —                             |                    |                               |                      |                             |
| Gel 2%,<br>60 mg/d      | 0.21<br>(0.21)                                    | 0.16<br>(0.27)   | 0.10<br>(0.26)     | -0.11<br>(0.26)               | —                  |                               |                      |                             |
| Oral TU,<br>120 mg/d    | 0.45<br>(0.33)                                    | 0.40<br>(0.37)   | 0.34<br>(0.36)     | 0.13<br>(0.36)                | 0.24<br>(0.39)     | —                             |                      |                             |
| Oral TU,<br>160 mg/d    | -0.53<br>(0.31)                                   | -0.58<br>(0.35)  | -0.64<br>(0.35)    | <b>-0.85</b><br><b>(0.34)</b> | -0.74<br>(0.38)    | <b>-0.98</b><br><b>(0.45)</b> | —                    |                             |
| IM TU, 1000<br>mg/12 wk | 0.31<br>(0.22)                                    | 0.25<br>(0.27)   | 0.19<br>(0.26)     | -0.01<br>(0.26)               | 0.10<br>(0.30)     | -0.14<br>(0.39)               | 0.83<br>(0.38)       | —                           |

IM = intramuscular injection, TU = testosterone undecanoate.  
 Note: a positive SMD indicates improved libido. Significant changes are indicated by use of bold and colour (green indicates that the row treatment treatment is significantly better than the column treatment, which red indicates that the row treatment is significantly worse than the column treatment).



## eFigure4: Individual trial results, erectile function

## A) All trials

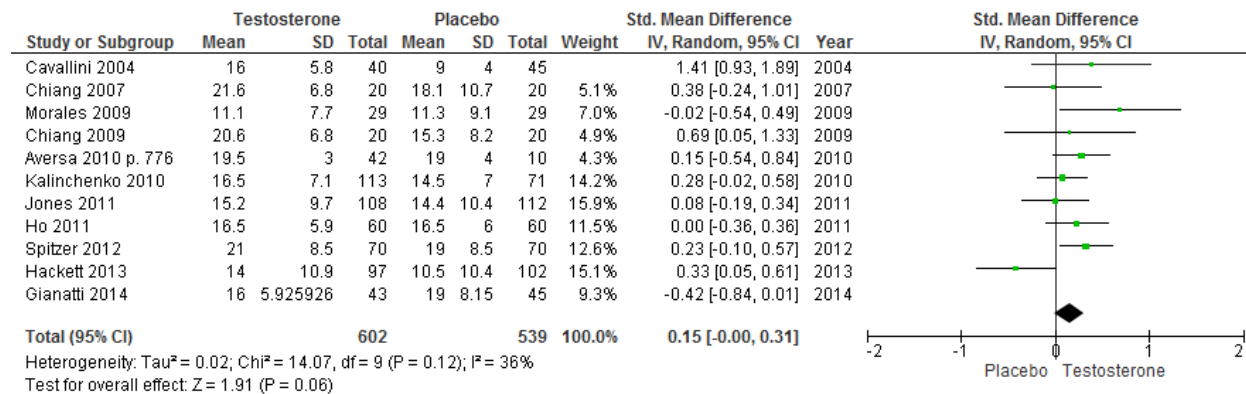

## B) Trials involving men without major comorbidities

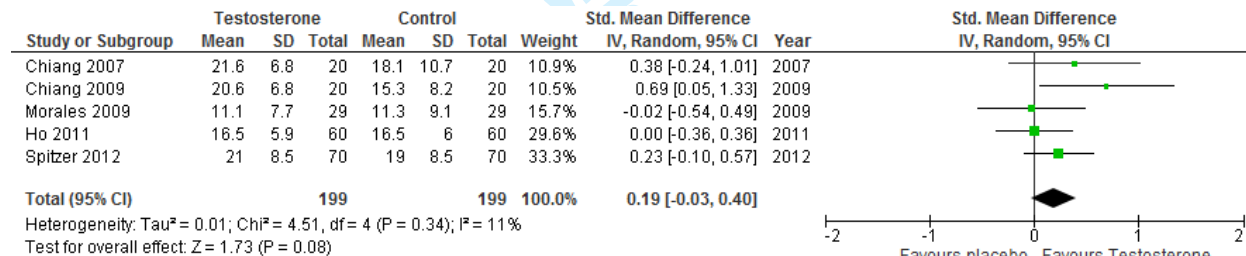

**eTable7: Erectile function at end of treatment – Bayesian network meta-analysis**

|                                  | Standardized mean difference (standard deviation) |                    |                     |                    |                      |                            |
|----------------------------------|---------------------------------------------------|--------------------|---------------------|--------------------|----------------------|----------------------------|
|                                  | Placebo                                           | Gel 1%,<br>50 mg/d | Gel 1%,<br>100 mg/d | Gel 2%,<br>60 mg/d | Oral, TU<br>160 mg/d | IM TU,<br>1000 mg/12<br>wk |
| <b>Gel 1%, 50 mg/d</b>           | 0.54(0.39)                                        | —                  |                     |                    |                      |                            |
| <b>Gel 1%, 100 mg/d</b>          | 0.23(0.48)                                        | -0.31(0.62)        | —                   |                    |                      |                            |
| <b>Gel 2%, 60 mg/d</b>           | 0.08(0.47)                                        | -0.46(0.61)        | -0.15(0.68)         | —                  |                      |                            |
| <b>Oral TU, 160 mg/d</b>         | -0.20(0.38)                                       | -0.74(0.55)        | -0.43(0.62)         | -0.28(0.61)        | —                    |                            |
| <b>IM TU, 1000 mg/ 12<br/>wk</b> | 0.08(0.22)                                        | -0.46(0.45)        | -0.15(0.53)         | 0.00(0.52)         | 0.28(0.40)           | —                          |

Note: IM = intramuscular injection, TU = testosterone undecanoate.  
Note: a positive SMD indicates improved erectile function. Significant changes are indicated by use of bold and colour (green indicates that the row treatment is significantly better than the column treatment, which red indicates that the row treatment is significantly worse than the column treatment).

eTable 8: Total testosterone level after 3 months of treatment – Bayesian network meta-analysis

|                        | Mean difference (standard deviation) |                |              |                |                |                 |                  |                  |                 |                      |                  |                  |                    |                  |                    |                        |
|------------------------|--------------------------------------|----------------|--------------|----------------|----------------|-----------------|------------------|------------------|-----------------|----------------------|------------------|------------------|--------------------|------------------|--------------------|------------------------|
|                        | Placebo                              | Patch 4.8 mg/d | Patch 5 mg/d | Gel 1% 50 mg/d | Gel 1% 75 mg/d | Gel 1% 100 mg/d | Oral TU 120 mg/d | Oral TU 160 mg/d | Pellets 1200 mg | IM TU 1000 mg/ 12 wk | IM TE 100 mg/ wk | IM TE 125 mg/ wk | IM TE 200 mg/ 2 wk | IM TE 250 g/ 3wk | IM TC 200 mg/ 4 wk | Durateston 250 mg/4 wk |
| Patch 4.8 mg/d         | 10.12 (5.80)                         | —              |              |                |                |                 |                  |                  |                 |                      |                  |                  |                    |                  |                    |                        |
| Patch 5 mg/d           | 2.53 (1.83)                          | -7.59 (6.07)   | —            |                |                |                 |                  |                  |                 |                      |                  |                  |                    |                  |                    |                        |
| Gel 1% 50 mg/d         | 5.32 (1.57)                          | -4.79 (6.01)   | 2.80 (1.79)  | —              |                |                 |                  |                  |                 |                      |                  |                  |                    |                  |                    |                        |
| Gel 1% 75 mg/d         | 7.52 (4.19)                          | -2.59 (7.14)   | 5.00 (4.57)  | 2.20 (4.48)    | —              |                 |                  |                  |                 |                      |                  |                  |                    |                  |                    |                        |
| Gel 1% 100 mg/d        | 9.61 (1.69)                          | -0.51 (6.04)   | 7.08 (1.81)  | 4.29 (1.74)    | 2.09 (4.51)    | —               |                  |                  |                 |                      |                  |                  |                    |                  |                    |                        |
| Oral TU 120 mg/d       | 4.35 (3.46)                          | -5.77 (6.78)   | 1.82 (3.90)  | -0.98 (3.79)   | -3.18 (5.44)   | -5.26 (3.84)    | —                |                  |                 |                      |                  |                  |                    |                  |                    |                        |
| Oral TU 160 mg/d       | -0.03 (3.35)                         | -10.15 (4.76)  | -2.56 (3.79) | -5.35 (3.69)   | -7.55 (5.36)   | -9.64 (3.73)    | -4.38 (4.83)     | —                |                 |                      |                  |                  |                    |                  |                    |                        |
| Pellets 1200 mg        | 19.60 (5.15)                         | 9.48 (4.67)    | 17.07 (5.46) | 14.28 (5.38)   | 12.08 (6.63)   | 9.99 (5.42)     | 15.25 (6.23)     | 19.63 (3.93)     | —               |                      |                  |                  |                    |                  |                    |                        |
| IM TU 1000 mg/ 12 wk   | 8.13 (2.31)                          | -1.99 (6.27)   | 5.60 (2.95)  | 2.81 (2.80)    | 0.61 (4.79)    | -1.48 (2.87)    | 3.78 (4.15)      | 8.16 (4.09)      | -11.47 (5.67)   | —                    |                  |                  |                    |                  |                    |                        |
| IM TE 100 mg/wk        | 8.67 (3.66)                          | -1.45 (6.87)   | 6.14 (4.09)  | 3.34 (3.98)    | 1.15 (5.57)    | -0.94 (4.03)    | 4.32 (5.01)      | 8.70 (4.94)      | -10.93 (6.33)   | 0.54 (4.33)          | —                |                  |                    |                  |                    |                        |
| IM TE 125 mg/wk        | 6.79 (5.25)                          | -3.33 (7.83)   | 4.26 (5.56)  | 1.47 (5.48)    | -0.73 (6.73)   | -2.82 (5.52)    | 2.44 (6.28)      | 6.82 (6.24)      | -12.81 (7.36)   | -1.34 (5.73)         | -1.88 (6.39)     | —                |                    |                  |                    |                        |
| IM TE 200 mg/2 wk      | 6.27 (3.88)                          | -3.85 (6.99)   | 3.75 (4.29)  | 0.95 (4.19)    | -1.25 (5.72)   | -3.34 (4.25)    | 1.93 (5.21)      | 6.30 (5.14)      | -13.33 (6.46)   | -1.86 (4.51)         | -2.40 (5.33)     | -0.52 (6.49)     | —                  |                  |                    |                        |
| IM TE 250 mg/3wk       | 10.09 (4.76)                         | -0.02 (3.33)   | 7.57 (5.08)  | 4.77 (5.00)    | 2.57 (6.33)    | 0.48 (5.04)     | 5.75 (5.90)      | 10.12 (3.39)     | -9.51 (3.28)    | 1.96 (5.31)          | 1.43 (6.01)      | 3.30 (7.10)      | 3.82 (6.14)        | —                |                    |                        |
| IM TC 200 mg/4 wk      | 0.51 (2.88)                          | -9.61 (6.48)   | -2.02 (3.42) | -4.81 (3.29)   | -7.01 (5.09)   | -9.10 (3.34)    | -3.84 (4.49)     | 0.54 (4.42)      | -19.09 (5.90)   | -7.62 (2.76)         | -8.16 (4.65)     | -6.28 (5.99)     | -5.76 (4.83)       | -9.58 (5.56)     | —                  |                        |
| Durateston 250 mg/4 wk | 1.12 (3.77)                          | -9.00 (6.95)   | -1.41 (4.20) | -4.21 (4.09)   | -6.40 (5.64)   | -8.49 (4.13)    | -3.23 (5.11)     | 1.15 (5.07)      | -18.48 (6.41)   | -7.01 (3.34)         | -7.55 (5.25)     | -5.67 (6.46)     | -5.15 (5.41)       | -8.97 (6.09)     | —                  |                        |

Note: IM = intramuscular, TC = testosterone cypionate, TE = testosterone enanthate, TU = testosterone undecanoate.

eTable 9: Total testosterone level after 6 months of treatment – Bayesian network meta-analysis

|                            | Mean difference (standard deviation) |                |              |                |                 |                |                   |                            |                  |                         |                 |                     |                   |                    |                  |                    |                    |                    |
|----------------------------|--------------------------------------|----------------|--------------|----------------|-----------------|----------------|-------------------|----------------------------|------------------|-------------------------|-----------------|---------------------|-------------------|--------------------|------------------|--------------------|--------------------|--------------------|
|                            | Placebo                              | Patch 4.8 mg/d | Patch 5 mg/d | Gel 1% 50 mg/d | Gel 1% 100 mg/d | Gel 2% 60 mg/d | Gel 2.5% 125 mg/d | Gel 2.5% 25 mg/d (scrotal) | Oral TU 160 mg/d | Oral TU 120 or 160 mg/d | Pellets 1200 mg | IM TU 1000 mg/12 wk | IM TE 150 mg /2wk | IM TE 200 mg /2 wk | IM TE 250 g /3wk | IM TE 300 mg /3 wk | IM TE 50-400 mg/wk | IM TC 200 mg /2 wk |
| Patch 4.8 mg/d             | 17.38 (7.17)                         | —              |              |                |                 |                |                   |                            |                  |                         |                 |                     |                   |                    |                  |                    |                    |                    |
| Patch 5 mg/d               | 8.48 (4.93)                          | -8.90 (8.75)   | —            |                |                 |                |                   |                            |                  |                         |                 |                     |                   |                    |                  |                    |                    |                    |
| Gel 1% 50 mg/d             | 8.50 (3.08)                          | -8.88 (7.82)   | 0.02 (5.82)  | —              |                 |                |                   |                            |                  |                         |                 |                     |                   |                    |                  |                    |                    |                    |
| Gel 1% 100 mg/d            | 6.63 (3.01)                          | -10.75 (7.78)  | -1.84 (5.76) | -1.86 (4.30)   | —               |                |                   |                            |                  |                         |                 |                     |                   |                    |                  |                    |                    |                    |
| Gel 2% 60 mg/d             | 18.56 (4.21)                         | 1.19 (8.29)    | 10.09 (6.49) | 10.07 (5.20)   | 11.93 (5.16)    | —              |                   |                            |                  |                         |                 |                     |                   |                    |                  |                    |                    |                    |
| Gel 2.5% 125 mg/d          | 12.20 (6.46)                         | -5.18 (9.67)   | 3.72 (4.21)  | 3.70 (7.17)    | 5.57 (7.12)     | -6.36 (7.72)   | —                 |                            |                  |                         |                 |                     |                   |                    |                  |                    |                    |                    |
| Gel 2.5% 25 mg/d (scrotal) | 7.90 (6.46)                          | -9.48 (9.70)   | -0.58 (4.21) | -0.60 (7.17)   | 1.27 (7.12)     | -10.66 (7.72)  | -4.30 (4.21)      | —                          |                  |                         |                 |                     |                   |                    |                  |                    |                    |                    |
| Oral TU 160 mg/d           | 3.51 (2.92)                          | -13.87 (6.54)  | -4.97 (5.73) | -4.99 (4.24)   | -3.13 (4.18)    | -15.06 (5.10)  | -8.69 (7.09)      | -4.39 (7.09)               | —                |                         |                 |                     |                   |                    |                  |                    |                    |                    |
| Oral TU 120 or 160 mg/d    | 5.66 (4.21)                          | -11.72 (8.34)  | -2.82 (6.49) | -2.84 (5.20)   | -0.97 (5.16)    | -12.90 (5.96)  | -6.54 (7.72)      | -2.24 (7.71)               | 2.15 (5.11)      | —                       |                 |                     |                   |                    |                  |                    |                    |                    |
| Pellets 1200 mg            | 6.74 (5.23)                          | -10.64 (6.12)  | -1.74 (7.20) | -1.76 (6.08)   | 0.11 (6.02)     | -11.82 (6.69)  | -5.46 (8.31)      | -1.16 (8.33)               | 3.23 (4.34)      | 1.08 (6.71)             | —               |                     |                   |                    |                  |                    |                    |                    |
| IM TU 1000 mg/12 wk        | 1.53 (2.95)                          | -15.85 (7.43)  | -6.95 (5.73) | -6.97 (4.25)   | -5.10 (4.21)    | -17.03 (5.11)  | -10.67 (7.09)     | -6.37 (7.09)               | -1.98 (3.50)     | -4.13 (5.13)            | -5.21 (5.58)    | —                   |                   |                    |                  |                    |                    |                    |
| IM TE 150 mg/2wk           | 12.68 (4.70)                         | -4.70 (8.58)   | 4.21 (6.81)  | 4.19 (5.61)    | 6.05 (5.59)     | -5.88 (6.31)   | 0.48 (7.97)       | 4.79 (7.98)                | 9.18 (5.54)      | 7.02 (6.29)             | 5.95 (7.05)     | 11.16 (5.56)        | —                 |                    |                  |                    |                    |                    |
| IM TE 200 mg/2 wk          | 2.47 (4.44)                          | -14.91 (8.41)  | -6.01 (6.62) | -6.03 (5.41)   | -4.17 (5.38)    | -16.09 (6.11)  | -9.73 (7.82)      | -5.43 (7.83)               | -1.04 (5.29)     | -3.19 (6.10)            | -4.27 (6.83)    | 0.94 (5.32)         | -10.22 (6.47)     | —                  |                  |                    |                    |                    |
| IM TE 250 g/3wk            | 12.12 (5.24)                         | -5.26 (4.89)   | 3.64 (7.22)  | 3.62 (6.08)    | 5.49 (6.04)     | -6.44 (6.70)   | -0.08 (8.33)      | 4.22 (8.35)                | 8.61 (4.35)      | 6.46 (6.71)             | 5.38 (3.69)     | 10.59 (5.60)        | -0.56 (7.06)      | 9.65 (6.84)        | —                |                    |                    |                    |
| IM TE 300 mg/ 3wk          | 18.28 (4.73)                         | 0.91 (8.59)    | 9.81 (6.83)  | 9.79 (5.66)    | 11.65 (5.61)    | -0.28 (6.32)   | 6.08 (7.99)       | 10.39 (8.00)               | 14.78 (5.55)     | 12.62 (6.33)            | 11.55 (7.01)    | 16.76 (5.58)        | 5.60 (6.70)       | 15.82 (6.49)       | 6.16 (7.04)      | —                  |                    |                    |
| IM TE 50-400 mg/wk         | 14.76 (5.92)                         | -2.62 (9.28)   | 6.29 (7.71)  | 6.27 (6.68)    | 8.13 (6.65)     | -3.80 (7.26)   | 2.56 (8.76)       | 6.87 (8.77)                | 11.26 (6.60)     | 9.10 (7.26)             | 8.03 (7.89)     | 13.24 (6.61)        | 2.08 (7.56)       | 12.30 (7.42)       | 2.64 (7.88)      | -3.52 (7.58)       | —                  |                    |
| IM TC 200 mg/2 wk          | 6.62 (5.46)                          | -10.76 (9.00)  | -1.86 (7.38) | -1.88 (6.26)   | -0.02 (6.25)    | -11.95 (6.90)  | -5.58 (8.47)      | -1.28 (8.47)               | 3.11 (6.20)      | 0.96 (6.88)             | -0.12 (7.55)    | 5.09 (6.21)         | -6.07 (7.19)      | 4.15 (7.00)        | -5.50 (7.57)     | -11.67 (7.23)      | -8.15 (8.08)       | —                  |

Note: IM = intramuscular, TC = testosterone cypionate, TE = testosterone enanthate, TU = testosterone undecanoate.

eTable 10: Total testosterone levels at the end of treatment – Bayesian network meta-analysis (2 pages)

|                            | Mean difference (standard deviation) |                |              |               |                |                |                 |                |                   |                            |                  |                  |                      |                 |                    |                     |                 |                 |                  |                   |                 |                   |                     |                   |                   |                         |  |
|----------------------------|--------------------------------------|----------------|--------------|---------------|----------------|----------------|-----------------|----------------|-------------------|----------------------------|------------------|------------------|----------------------|-----------------|--------------------|---------------------|-----------------|-----------------|------------------|-------------------|-----------------|-------------------|---------------------|-------------------|-------------------|-------------------------|--|
|                            | Placebo                              | Patch 4.8 mg/d | Patch 5 mg/d | Gel 1% 5 mg/d | Gel 1% 50 mg/d | Gel 1% 75 mg/d | Gel 1% 100 mg/d | Gel 2% 60 mg/d | Gel 2.5% 125 mg/d | Gel 2.5% 25 mg/d (scrotal) | Oral TU 120 mg/d | Oral TU 160 mg/d | Oral TU 120-160 mg/d | Pellets 1200 mg | IM TU 1000 mg/9 wk | IM TU 1000 mg/12 wk | IM TE 100 mg/wk | IM TE 125 mg/wk | IM TE 150 mg/2wk | IM TE 200 mg/2 wk | IM TE 250 g/3wk | IM TE 300 mg/3 wk | IM TE 400 mg/1-2 wk | IM TC 200 mg/2 wk | IM TC 200 mg/4 wk | Duratest on 250 mg/4 wk |  |
| Patch 4.8 mg/d             | 7.93 (5.76)                          | —              |              |               |                |                |                 |                |                   |                            |                  |                  |                      |                 |                    |                     |                 |                 |                  |                   |                 |                   |                     |                   |                   |                         |  |
| Patch 5 mg/d               | 0.57 (1.77)                          | -7.36 (6.04)   | —            |               |                |                |                 |                |                   |                            |                  |                  |                      |                 |                    |                     |                 |                 |                  |                   |                 |                   |                     |                   |                   |                         |  |
| Gel 1% 5 mg/d              | 3.69 (4.38)                          | -4.24 (7.26)   | 3.12 (4.72)  | —             |                |                |                 |                |                   |                            |                  |                  |                      |                 |                    |                     |                 |                 |                  |                   |                 |                   |                     |                   |                   |                         |  |
| Gel 1% 50 mg/d             | 4.35 (1.48)                          | -3.58 (5.95)   | 3.78 (1.89)  | 0.66 (4.62)   | —              |                |                 |                |                   |                            |                  |                  |                      |                 |                    |                     |                 |                 |                  |                   |                 |                   |                     |                   |                   |                         |  |
| Gel 1% 75 mg/d             | 7.47 (4.71)                          | -0.46 (7.47)   | 6.90 (5.03)  | 3.78 (6.43)   | 3.12 (4.94)    | —              |                 |                |                   |                            |                  |                  |                      |                 |                    |                     |                 |                 |                  |                   |                 |                   |                     |                   |                   |                         |  |
| Gel 1% 100 mg/d            | 7.95 (1.71)                          | 0.02 (6.02)    | 7.39 (1.98)  | 4.27 (4.70)   | 3.61 (1.88)    | 0.49 (5.01)    | —               |                |                   |                            |                  |                  |                      |                 |                    |                     |                 |                 |                  |                   |                 |                   |                     |                   |                   |                         |  |
| Gel 2% 60 mg/d             | 19.77 (4.00)                         | 11.84 (7.03)   | 19.20 (4.37) | 16.08 (5.94)  | 15.42 (4.27)   | 12.30 (6.19)   | 11.82 (4.35)    | —              |                   |                            |                  |                  |                      |                 |                    |                     |                 |                 |                  |                   |                 |                   |                     |                   |                   |                         |  |
| Gel 2.5% 125 mg/d          | 4.28 (4.37)                          | -3.65 (7.23)   | 3.71 (4.00)  | 0.59 (6.17)   | -0.07 (4.42)   | -3.19 (6.39)   | -3.68 (4.46)    | -15.49 (5.91)  | —                 |                            |                  |                  |                      |                 |                    |                     |                 |                 |                  |                   |                 |                   |                     |                   |                   |                         |  |
| Gel 2.5% 25 mg/d (scrotal) | 0.05 (4.36)                          | -7.88 (7.24)   | -0.51 (3.98) | -3.63 (6.17)  | -4.29 (4.41)   | -7.41 (6.40)   | -7.90 (4.45)    | -19.72 (5.91)  | -4.22 (4.01)      | —                          |                  |                  |                      |                 |                    |                     |                 |                 |                  |                   |                 |                   |                     |                   |                   |                         |  |
| Oral TU 120 mg/d           | 4.31 (4.07)                          | -3.62 (7.06)   | 3.75 (4.44)  | 0.63 (5.98)   | -0.03 (4.33)   | -3.15 (6.23)   | -3.64 (4.42)    | -15.46 (5.71)  | 0.04 (5.97)       | 4.26 (5.96)                | —                |                  |                      |                 |                    |                     |                 |                 |                  |                   |                 |                   |                     |                   |                   |                         |  |
| Oral TU 160 mg/d           | 1.37 (2.08)                          | -6.56 (5.74)   | 0.80 (2.74)  | -2.32 (4.84)  | -2.98 (2.56)   | -6.10 (5.15)   | -6.58 (2.70)    | -18.40 (4.52)  | -2.91 (4.83)      | 1.32 (4.83)                | -2.95 (4.58)     | —                |                      |                 |                    |                     |                 |                 |                  |                   |                 |                   |                     |                   |                   |                         |  |
| Oral TU 120 or 160 mg/d    | 5.68 (4.00)                          | -2.25 (7.01)   | 5.12 (4.38)  | 2.00 (5.94)   | 1.34 (4.27)    | -1.78 (6.18)   | -2.27 (4.35)    | -14.08 (5.66)  | 1.41 (5.94)       | 5.63 (5.93)                | 1.37 (5.72)      | 4.32 (4.51)      | —                    |                 |                    |                     |                 |                 |                  |                   |                 |                   |                     |                   |                   |                         |  |
| Pellets 1200 mg            | 2.67 (3.78)                          | -5.26 (5.86)   | 2.11 (4.18)  | -1.01 (5.77)  | -1.67 (4.07)   | -4.79 (6.04)   | -5.28 (4.14)    | -17.09 (5.51)  | -1.60 (5.78)      | 2.62 (5.76)                | -1.64 (5.59)     | 1.31 (3.55)      | -3.01 (5.50)         | —               |                    |                     |                 |                 |                  |                   |                 |                   |                     |                   |                   |                         |  |
| IM TU 1000 mg/9 wk         | 16.24 (5.25)                         | 8.31 (6.50)    | 15.67 (5.55) | 12.55 (6.83)  | 11.89 (5.46)   | 8.77 (7.07)    | 8.28 (5.53)     | -3.53 (6.64)   | 11.96 (6.84)      | 16.18 (6.83)               | 11.92 (6.66)     | 14.87 (5.23)     | 10.55 (6.61)         | 13.56 (5.32)    | —                  |                     |                 |                 |                  |                   |                 |                   |                     |                   |                   |                         |  |
| IM TU 1000 mg/12 wk        | 8.42 (1.37)                          | 0.49 (5.88)    | 7.85 (2.23)  | 4.73 (4.59)   | 4.07 (2.02)    | 0.95 (4.89)    | 0.46 (2.19)     | -11.35 (4.23)  | 4.14 (4.57)       | 8.36 (4.57)                | 4.10 (4.29)      | 7.05 (2.36)      | 2.73 (4.22)          | 5.74 (3.96)     | -7.82 (5.38)       | —                   |                 |                 |                  |                   |                 |                   |                     |                   |                   |                         |  |
| IM TE 100 mg/wk            | 9.52 (3.02)                          | 1.59 (6.52)    | 8.95 (3.49)  | 5.83 (5.33)   | 5.17 (3.36)    | 2.05 (5.58)    | 1.56 (3.46)     | -10.25 (5.01)  | 5.24 (5.29)       | 9.46 (5.29)                | 5.20 (5.09)      | 8.15 (3.66)      | 3.83 (5.04)          | 6.84 (4.84)     | -6.72 (6.06)       | 1.10 (3.32)         | —               |                 |                  |                   |                 |                   |                     |                   |                   |                         |  |
| IM TE 125 mg/wk            | 6.66 (5.41)                          | -1.27 (7.91)   | 6.09 (5.68)  | 2.9 (6.98)    | 2.31 (5.60)    | -0.81 (7.18)   | -1.30 (5.66)    | -13.11 (6.73)  | 2.38 (6.98)       | 6.60 (6.94)                | 2.34 (6.78)      | 5.29 (5.79)      | 0.97 (6.74)          | 3.98 (6.60)     | -9.58 (7.55)       | -1.76 (5.58)        | -2.86 (6.19)    | —               |                  |                   |                 |                   |                     |                   |                   |                         |  |

|                        | Mean difference (standard deviation) |                |              |               |                |                |                 |                |                   |                            |                  |                  |                      |                 |                    |                     |                 |                 |                  |                   |                 |                   |                        |                   |                   |                           |  |  |
|------------------------|--------------------------------------|----------------|--------------|---------------|----------------|----------------|-----------------|----------------|-------------------|----------------------------|------------------|------------------|----------------------|-----------------|--------------------|---------------------|-----------------|-----------------|------------------|-------------------|-----------------|-------------------|------------------------|-------------------|-------------------|---------------------------|--|--|
|                        | Placebo                              | Patch 4.8 mg/d | Patch 5 mg/d | Gel 1% 5 mg/d | Gel 1% 50 mg/d | Gel 1% 75 mg/d | Gel 1% 100 mg/d | Gel 2% 60 mg/d | Gel 2.5% 125 mg/d | Gel 2.5% 25 mg/d (scrotal) | Oral TU 120 mg/d | Oral TU 160 mg/d | Oral TU 120-160 mg/d | Pellets 1200 mg | IM TU 1000 mg/9 wk | IM TU 1000 mg/12 wk | IM TE 100 mg/wk | IM TE 125 mg/wk | IM TE 150 mg/2wk | IM TE 200 mg/2 wk | IM TE 250 g/3wk | IM TE 300 mg/3 wk | IM TE 50-400 mg/1-2 wk | IM TC 200 mg/2 wk | IM TC 200 mg/4 wk | Durateston on 250 mg/4 wk |  |  |
| IM TE 150 mg/2wk       | 12.68 (4.59)                         | 4.75 (7.36)    | 12.11 (4.92) | 8.99 (6.31)   | 8.33 (4.82)    | 5.21 (6.56)    | 4.73 (4.90)     | -7.09 (6.07)   | 8.40 (6.33)       | 12.62 (6.32)               | 8.37 (6.16)      | 11.31 (5.03)     | 6.99 (6.08)          | 10.00 (5.92)    | -3.56 (6.96)       | 4.26 (4.78)         | 3.16 (5.49)     | 6.02 (7.07)     | —                |                   |                 |                   |                        |                   |                   |                           |  |  |
| IM TE 200 mg/2wk       | 9.16 (2.63)                          | 1.23 (6.32)    | 8.59 (2.78)  | 5.47 (5.11)   | 4.82 (2.91)    | 1.70 (5.39)    | 1.21 (3.01)     | -10.61 (4.79)  | 4.89 (4.85)       | 9.11 (4.85)                | 4.85 (4.85)      | 7.79 (3.35)      | 3.48 (4.81)          | 6.49 (4.60)     | -7.07 (5.86)       | 0.75 (2.97)         | -0.35 (4.00)    | 2.51 (6.02)     | -3.52 (5.30)     | —                 |                 |                   |                        |                   |                   |                           |  |  |
| IM TE 250 mg/3wk       | 8.26 (3.03)                          | 0.33 (4.92)    | 7.69 (3.52)  | 4.57 (5.33)   | 3.92 (3.38)    | 0.79 (5.60)    | 0.31 (3.48)     | -11.51 (5.04)  | 3.98 (5.33)       | 8.21 (5.32)                | 3.95 (5.10)      | 6.89 (2.99)      | 2.58 (5.03)          | 5.59 (3.15)     | -7.98 (4.28)       | -0.15 (3.26)        | -1.26 (4.28)    | 1.61 (6.20)     | -4.42 (5.49)     | -0.90 (4.01)      | —               |                   |                        |                   |                   |                           |  |  |
| IM TE 300 mg/3 wk      | 18.24 (4.56)                         | 10.31 (7.36)   | 17.67 (4.89) | 14.55 (6.33)  | 13.89 (4.80)   | 10.77 (6.58)   | 10.28 (4.87)    | -1.53 (6.07)   | 13.96 (6.31)      | 18.18 (6.32)               | 13.92 (6.11)     | 16.87 (5.01)     | 12.55 (6.07)         | 15.56 (5.93)    | 2.00 (6.96)        | 9.82 (4.76)         | 8.72 (5.47)     | 11.58 (7.06)    | 5.56 (6.48)      | 9.07 (5.26)       | 9.97 (5.49)     | —                 |                        |                   |                   |                           |  |  |
| IM TE 50-400 mg/1-2 wk | 14.73 (5.81)                         | 6.80 (8.18)    | 14.16 (6.06) | 11.04 (7.27)  | 10.39 (5.98)   | 7.27 (7.48)    | 6.78 (6.06)     | -5.04 (7.06)   | 10.45 (7.26)      | 14.68 (7.26)               | 10.42 (7.09)     | 13.36 (6.16)     | 9.05 (7.04)          | 12.06 (6.95)    | -1.51 (7.84)       | 6.32 (5.96)         | 5.22 (6.54)     | 8.08 (7.95)     | 2.05 (7.44)      | 5.57 (6.39)       | 6.47 (6.56)     | -3.50 (7.39)      | —                      |                   |                   |                           |  |  |
| IM TC 200 mg/2 wk      | 3.21 (4.75)                          | -4.72 (7.45)   | 2.64 (5.06)  | -0.48 (6.43)  | -1.14 (4.97)   | -4.26 (6.69)   | -4.75 (5.05)    | -16.56 (6.22)  | -1.07 (6.45)      | 3.15 (6.45)                | -1.11 (6.24)     | 1.84 (5.18)      | -2.48 (6.22)         | 0.53 (6.07)     | -13.03 (7.09)      | -5.21 (4.94)        | -6.31 (5.63)    | -3.45 (7.21)    | -9.47 (6.60)     | -5.96 (5.43)      | -5.05 (5.64)    | -15.03 (6.57)     | -11.52 (7.51)          | —                 |                   |                           |  |  |
| IM TC 200 mg/4 wk      | 1.36 (4.29)                          | -6.57 (7.13)   | 0.79 (4.63)  | -2.33 (6.12)  | -2.99 (4.54)   | -6.11 (6.37)   | -6.60 (4.60)    | -18.41 (5.85)  | -2.92 (6.12)      | 1.30 (6.12)                | -2.96 (5.90)     | -0.01 (4.70)     | -4.33 (5.87)         | -1.32 (5.67)    | -14.88 (6.73)      | -7.06 (4.06)        | -8.16 (5.24)    | -5.30 (6.91)    | -11.32 (6.26)    | -7.81 (5.02)      | -6.91 (5.19)    | -16.88 (6.24)     | -13.38 (7.21)          | -1.85 (6.40)      | —                 |                           |  |  |
| Durateston 250 mg/4 wk | 1.61 (4.35)                          | -6.32 (7.16)   | 1.05 (4.70)  | -2.07 (6.18)  | -2.73 (4.59)   | -5.85 (6.41)   | -6.34 (4.66)    | -18.15 (5.91)  | -2.66 (6.16)      | 1.56 (6.16)                | -2.70 (5.95)     | 0.25 (4.76)      | -4.07 (5.90)         | -1.06 (5.71)    | -14.62 (6.77)      | -6.80 (4.13)        | -7.90 (5.29)    | -5.04 (6.93)    | -11.06 (6.32)    | -7.55 (5.08)      | -6.65 (5.25)    | -16.62 (6.29)     | -13.12 (7.27)          | -1.59 (6.42)      | 0.26 (4.09)       | —                         |  |  |

Note: IM = intramuscular, TC = testosterone cypionate, TE = testosterone enanthate, TU = testosterone undecanoate.

**eFigure 5: Odds of cardiovascular death associated with the use of any testosterone v. placebo**

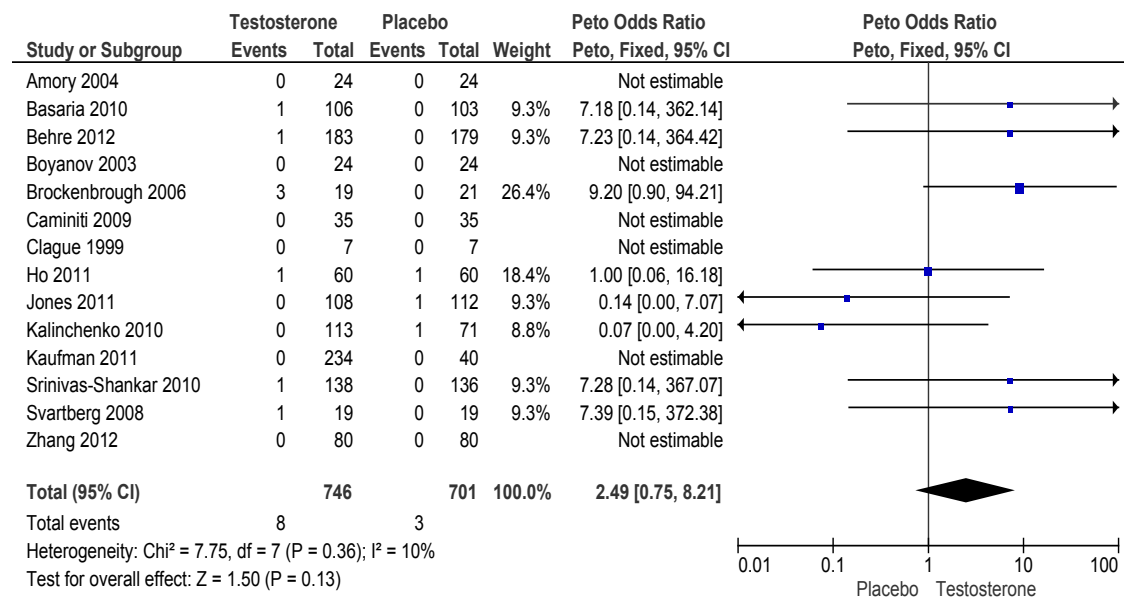

**eTable 11: Odds of cardiovascular death associated with individual testosterone products – Bayesian network meta-analysis**

|                                         | Odds ratio (95% credible interval)* |                                 |                                |                           |                                  |                           |                              |                           |                          |                          |
|-----------------------------------------|-------------------------------------|---------------------------------|--------------------------------|---------------------------|----------------------------------|---------------------------|------------------------------|---------------------------|--------------------------|--------------------------|
|                                         | Placebo                             | Gel 1%,<br>50 mg/d              | Gel 1%,<br>100 mg/d            | Gel 1.62%,<br>40 mg/d     | Gel 2%,<br>60 mg/d               | Oral TU<br>120 mg/d       | Oral TU,<br>T-based<br>dose† | IM TU,<br>1000<br>mg/12wk | IM TE,<br>200 mg/2<br>wk | IM TE,<br>250<br>mg/3 wk |
| <b>Gel 1%,<br/>50 mg/d</b>              | 1.98<br>(0.44,<br>9.16)             | —                               |                                |                           |                                  |                           |                              |                           |                          |                          |
| <b>Gel 1%,<br/>100 mg/d</b>             | 1.51<br>(0.11,<br>25.19)            | <b>0.76</b><br>(0.04,<br>18.25) | —                              |                           |                                  |                           |                              |                           |                          |                          |
| <b>Gel<br/>1.62%,<br/>40 mg/d</b>       | 0.38<br>(0.02,<br>11.14)            | 0.19<br>(0.01,<br>7.39)         | 0.25<br>(0.00,<br>17.36)       | —                         |                                  |                           |                              |                           |                          |                          |
| <b>Gel 2%,<br/>60 mg/d</b>              | 0.26<br>(0.01,<br>3.60)             | 0.13<br>(0.00,<br>2.79)         | <b>0.16</b><br>(0.00,<br>7.02) | 0.65<br>(0.00,<br>44.60)  | —                                |                           |                              |                           |                          |                          |
| <b>Oral TU<br/>120 mg/d</b>             | 0.52<br>(0.01,<br>12.71)            | 0.26<br>(0.00,<br>8.93)         | 0.34<br>(0.00,<br>22.19)       | 1.35<br>(0.01,<br>108.20) | 2.07<br>(0.02,<br>208.90)        | —                         |                              |                           |                          |                          |
| <b>Oral TU,<br/>T-based<br/>dose†</b>   | 0.48<br>(0.01,<br>10.85)            | 0.24<br>(0.00,<br>7.97)         | 0.30<br>(0.00,<br>18.93)       | 1.17<br>(0.01,<br>106.60) | <b>1.88</b><br>(0.02,<br>184.90) | 0.90<br>(0.01,<br>128.10) | —                            |                           |                          |                          |
| <b>IM TU,<br/>1000<br/>mg/12<br/>wk</b> | 0.66<br>(0.15,<br>2.74)             | 0.34<br>(0.04,<br>2.64)         | 0.43<br>(0.02,<br>8.81)        | 1.73<br>(0.04,<br>56.03)  | 2.58<br>(0.12,<br>99.44)         | 1.27<br>(0.04,<br>63.46)  | 1.40<br>(0.04,<br>85.15)     | —                         |                          |                          |
| <b>IM TE,<br/>200 mg<br/>/2 wk</b>      | 0.59<br>(0.03,<br>6.12)             | 0.29<br>(0.01,<br>5.57)         | 0.38<br>(0.01,<br>13.00)       | 1.40<br>(0.02,<br>81.67)  | 2.19<br>(0.04,<br>160.80)        | 1.11<br>(0.01,<br>91.06)  | 1.20<br>(0.02,<br>114.80)    | 0.86<br>(0.04,<br>14.99)  | —                        |                          |
| <b>IM TE,<br/>250 mg<br/>/3 wk</b>      | 0.45<br>(0.01,<br>14.09)            | 0.22<br>(0.00,<br>9.35)         | 0.29<br>(0.00,<br>19.59)       | 1.19<br>(0.01,<br>113.90) | 1.77<br>(0.02,<br>224.00)        | 0.86<br>(0.01,<br>140.20) | 0.97<br>(0.01,<br>151.30)    | 0.68<br>(0.02,<br>18.53)  | 0.79<br>(0.01,<br>60.90) | —                        |

Note: IM = intramuscular injection, TC = testosterone cypionate, TE = testosterone enanthate, TU = testosterone undecanoate.

Odds ratios greater than one indicate that the treatment specified in the row has a higher odds of an event than the column treatment. Bold results indicate statistical significance.

\*Random-effects model.

†Oral TU dose based on testosterone levels at baseline. Patients with total testosterone < 8 nmol/L received 120 mg/d; patients with total testosterone between 8 and 12 nmol/L received 160 mg/d (data not reported by dose).



eFigure 6: Odds of myocardial infarction associated with the use of any testosterone v. placebo

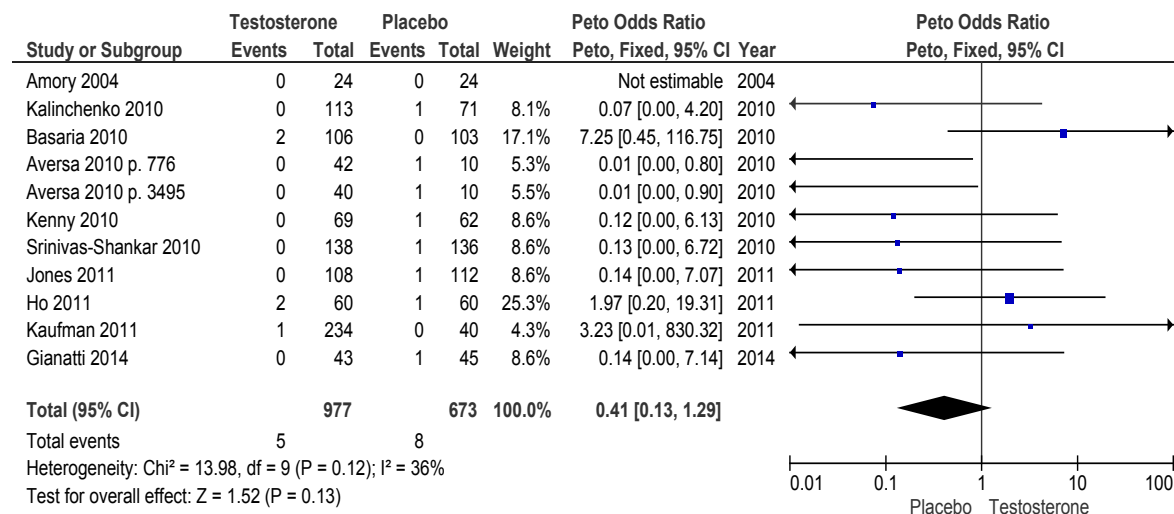

**eTable 12: Odds of myocardial infarction associated with individual testosterone products – Bayesian network meta-analysis**

|                                         | Odds ratio (95% credible interval) |                            |                            |                          |                          |                           |                           |                           |                          |
|-----------------------------------------|------------------------------------|----------------------------|----------------------------|--------------------------|--------------------------|---------------------------|---------------------------|---------------------------|--------------------------|
|                                         | Placebo                            | Gel 1%,<br>5 mg/d          | Gel 1%,<br>50 mg/d         | Gel 1%,<br>100 mg/d      | Gel 1.62%,<br>40 mg/d    | Gel 2% 60<br>mg/d         | Oral TU<br>160 mg/d       | IM TU,<br>1000<br>mg/12wk | IM TE,<br>200 mg/2<br>wk |
| <b>Gel 1%,<br/>5 mg/d</b>               | 0.25<br>(0.01,<br>3.97)            | —                          |                            |                          |                          |                           |                           |                           |                          |
| <b>Gel 1%,<br/>50 mg/d</b>              | 0.26<br>(0.01,<br>3.79)            | 1.00<br>(0.01,<br>103.70)  | —                          |                          |                          |                           |                           |                           |                          |
| <b>Gel 1%,<br/>100<br/>mg/d</b>         | 2.54<br>(0.25,<br>32.45)           | 10.67<br>(0.27,<br>827.90) | 10.83<br>(0.27,<br>822.70) | —                        |                          |                           |                           |                           |                          |
| <b>Gel<br/>1.62%,<br/>40 mg/d</b>       | 0.78<br>(0.05,<br>20.17)           | 3.44<br>(0.07,<br>315.70)  | 3.28<br>(0.06,<br>446.90)  | 0.32<br>(0.01,<br>16.31) | —                        |                           |                           |                           |                          |
| <b>Gel 2%,<br/>60 mg/d</b>              | 0.26<br>(0.01,<br>3.98)            | 1.04<br>(0.01,<br>92.63)   | 1.03<br>(0.01,<br>101.50)  | 0.10<br>(0.00,<br>3.86)  | 0.31<br>(0.00,<br>16.20) | —                         |                           |                           |                          |
| <b>Oral TU<br/>160<br/>mg/d</b>         | 0.24<br>(0.00,<br>5.52)            | 0.95<br>(0.00,<br>140.30)  | 0.95<br>(0.00,<br>115.90)  | 0.09<br>(0.00,<br>4.95)  | 0.29<br>(0.00,<br>22.33) | 0.90<br>(0.00,<br>98.30)  | —                         |                           |                          |
| <b>IM TU,<br/>1000<br/>mg/12<br/>wk</b> | 0.46<br>(0.12,<br>1.49)            | 1.82<br>(0.09,<br>87.08)   | 1.81<br>(0.09,<br>92.19)   | 0.17<br>(0.01,<br>2.53)  | 0.58<br>(0.02,<br>12.42) | 1.73<br>(0.08,<br>78.66)  | 1.88<br>(0.08,<br>191.00) | —                         |                          |
| <b>IM TE,<br/>200<br/>mg/2<br/>wk</b>   | 0.55<br>(0.01,<br>15.52)           | 2.18<br>(0.02,<br>313.50)  | 2.21<br>(0.02,<br>282.20)  | 0.20<br>(0.00,<br>12.36) | 0.65<br>(0.00,<br>51.47) | 2.07<br>(0.02,<br>275.60) | 2.26<br>(0.01,<br>543.40) | 1.21<br>(0.02,<br>43.64)  | —                        |

Note: IM = intramuscular injection, TE = testosterone enanthate, TU = testosterone undecanoate.

**eFigure 7: Odds of prostate cancer associated with the use of any testosterone v. placebo**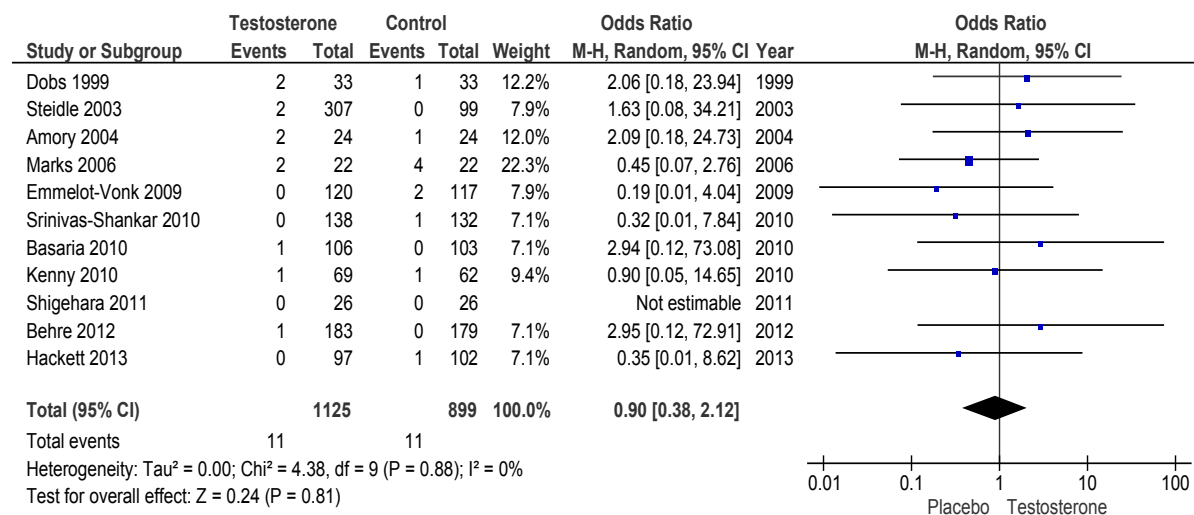

**eTable 13: Odds of prostate cancer associated with individual testosterone products – Bayesian network meta-analysis**

|                             | Odds ratio (95% credible interval) |                       |                        |                       |                       |                         |                        |                       |                       |                    |
|-----------------------------|------------------------------------|-----------------------|------------------------|-----------------------|-----------------------|-------------------------|------------------------|-----------------------|-----------------------|--------------------|
|                             | Placebo                            | Patch 5 mg/d          | Gel 1%, 5 mg/d         | Gel 1% 50 mg/d        | Gel 1%, 100 mg/d      | Oral TU 160 mg/d        | IM TU, 1000 mg/12wk    | IM TE, 150 mg/2wk     | IM TE, 200 mg/2 wk    | IM TE, 250 mg/4 wk |
| <b>Patch 5 mg/d</b>         | 2.66<br>(0.37, 19.15)              | —                     |                        |                       |                       |                         |                        |                       |                       |                    |
| <b>Gel 1%, 5 mg/d</b>       | 0.65<br>(0.04, 8.54)               | 0.24<br>(0.01, 6.40)  | —                      |                       |                       |                         |                        |                       |                       |                    |
| <b>Gel 1% 50 mg/d</b>       | 0.53<br>(0.08, 2.89)               | 0.20<br>(0.02, 2.08)  | 0.82<br>(0.03, 22.64)  | —                     |                       |                         |                        |                       |                       |                    |
| <b>Gel 1%, 100 mg/d</b>     | 0.80<br>(0.09, 5.48)               | 0.30<br>(0.02, 3.30)  | 1.23<br>(0.05, 39.26)  | 1.51<br>(0.11, 21.44) | —                     |                         |                        |                       |                       |                    |
| <b>Oral TU 160 mg/d</b>     | 0.17<br>(0.01, 2.16)               | 0.06<br>(0.00, 1.48)  | 0.26<br>(0.00, 10.95)  | 0.31<br>(0.01, 7.99)  | 0.21<br>(0.00, 6.28)  | —                       |                        |                       |                       |                    |
| <b>IM TU, 1000 mg/12 wk</b> | 0.28<br>(0.01, 4.07)               | 0.10<br>(0.00, 2.79)  | 0.41<br>(0.01, 23.54)  | 0.52<br>(0.01, 12.50) | 0.34<br>(0.01, 11.36) | 1.61<br>(0.02, 119.70)  | —                      |                       |                       |                    |
| <b>IM TE, 150 mg/2wk</b>    | 0.43<br>(0.05, 2.84)               | 0.16<br>(0.01, 2.38)  | 0.67<br>(0.02, 21.26)  | 0.80<br>(0.05, 11.61) | 0.54<br>(0.03, 9.83)  | 2.53<br>(0.10, 114.40)  | 1.55<br>(0.05, 77.57)  | —                     |                       |                    |
| <b>IM TE, 200 mg/2 wk</b>   | 2.36<br>(0.35, 18.33)              | 0.90<br>(0.12, 7.18)  | 3.83<br>(0.14, 118.00) | 4.51<br>(0.39, 66.58) | 2.96<br>(0.23, 52.73) | 14.36<br>(0.58, 690.30) | 8.80<br>(0.31, 451.50) | 5.73<br>(0.38, 93.03) | —                     |                    |
| <b>IM TE, 250 mg/4 wk</b>   | 0.61<br>(0.01, 15.70)              | 0.23<br>(0.00, 10.32) | 1.01<br>(0.01, 76.71)  | 1.16<br>(0.02, 48.15) | 0.78<br>(0.01, 39.09) | 3.68<br>(0.04, 334.90)  | 2.28<br>(0.02, 244.50) | 1.44<br>(0.02, 68.34) | 0.25<br>(0.00, 10.89) | —                  |

Note: IM = intramuscular injection, TE = testosterone enanthate, TU = testosterone undecanoate.

**eFigure 8: Odds of serious adverse events associated with the use of any testosterone v. placebo**

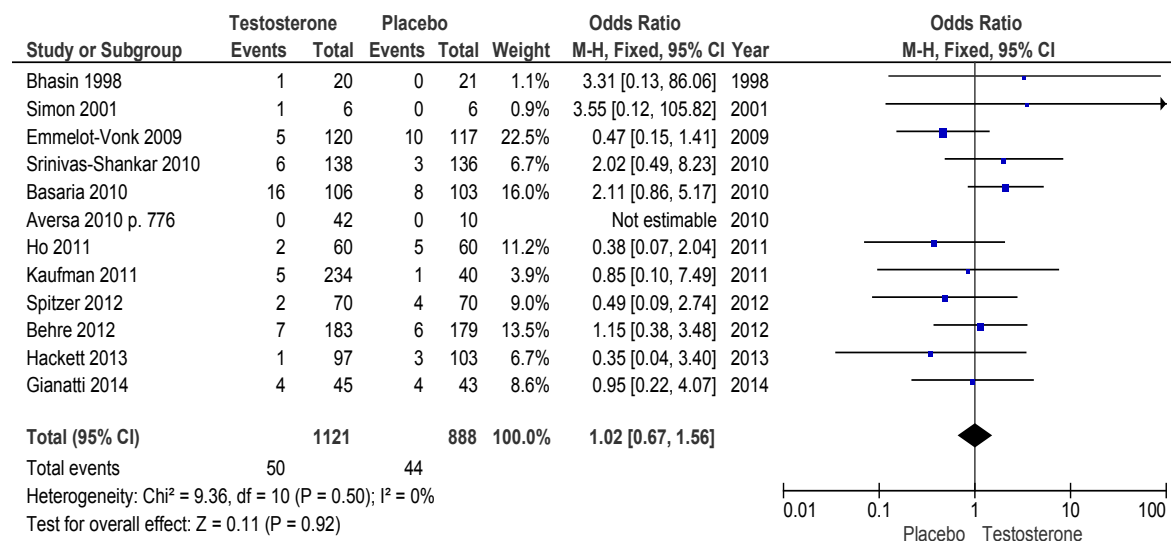

eTable 14: Odds of serious adverse events associated with individual testosterone products – Bayesian network meta-analysis

| Odds ratio (95% credible interval) |                        |                        |                        |                        |                        |                        |                        |                       |                       |                    |
|------------------------------------|------------------------|------------------------|------------------------|------------------------|------------------------|------------------------|------------------------|-----------------------|-----------------------|--------------------|
|                                    | Placebo                | Patch, 5 mg/d          | Gel 1%, 50 mg/d        | Gel 1%, 100 mg/d       | Gel 1%, 125 mg/d       | Gel 1.62%, 40.5 mg/d   | Oral TU 160 mg/d       | IM TU, 1000 mg/9 wk   | IM TU, 1000 mg/12 wk  | IM TE, 250 mg/3 wk |
| <b>Patch, 5 mg/d</b>               | 1.29<br>(0.13, 14.21)  | —                      |                        |                        |                        |                        |                        |                       |                       |                    |
| <b>Gel 1%, 50 mg/d</b>             | 1.36<br>(0.49, 3.84)   | 1.06<br>(0.08, 12.44)  | —                      |                        |                        |                        |                        |                       |                       |                    |
| <b>Gel 1%, 100 mg/d</b>            | 1.37<br>(0.49, 3.48)   | 1.05<br>(0.08, 12.61)  | 1.00<br>(0.23, 4.04)   | —                      |                        |                        |                        |                       |                       |                    |
| <b>Gel 1%, 125 mg/d</b>            | 2.26<br>(0.12, 50.44)  | 1.69<br>(0.04, 86.86)  | 1.64<br>(0.07, 42.10)  | 1.65<br>(0.08, 44.43)  | —                      |                        |                        |                       |                       |                    |
| <b>Gel 1.62%, 40.5 mg/d</b>        | 0.79<br>(0.12, 8.05)   | 0.62<br>(0.03, 16.54)  | 0.58<br>(0.07, 7.12)   | 0.58<br>(0.07, 7.63)   | 0.37<br>(0.01, 15.61)  | —                      |                        |                       |                       |                    |
| <b>Oral TU 160 mg/d</b>            | 0.45<br>(0.12, 1.60)   | 0.35<br>(0.02, 4.71)   | 0.33<br>(0.06, 1.66)   | 0.33<br>(0.06, 1.66)   | 0.20<br>(0.01, 4.65)   | 0.56<br>(0.04, 5.78)   | —                      |                       |                       |                    |
| <b>IM TU, 1000 mg/9 wk</b>         | 2.83<br>(0.08, 193.70) | 2.11<br>(0.07, 116.90) | 2.02<br>(0.05, 152.20) | 2.09<br>(0.05, 161.10) | 1.28<br>(0.01, 223.60) | 3.45<br>(0.05, 356.40) | 6.25<br>(0.13, 524.50) | —                     |                       |                    |
| <b>IM TU, 1000 mg/12 wk</b>        | 0.50<br>(0.17, 1.36)   | 0.39<br>(0.03, 4.46)   | 0.36<br>(0.08, 1.54)   | 0.36<br>(0.09, 1.55)   | 0.22<br>(0.01, 4.76)   | 0.61<br>(0.05, 5.28)   | 1.09<br>(0.22, 5.65)   | 0.17<br>(0.00, 6.57)  | —                     |                    |
| <b>IM TE, 250 mg/3 wk</b>          | 1.89<br>(0.15, 26.54)  | 1.48<br>(0.28, 6.32)   | 1.36<br>(0.09, 22.83)  | 1.39<br>(0.09, 23.37)  | 0.83<br>(0.01, 50.46)  | 2.31<br>(0.08, 64.42)  | 4.28<br>(0.24, 82.89)  | 0.70<br>(0.01, 16.17) | 3.80<br>(0.26, 67.67) | —                  |

Note: IM = intramuscular injection, TE = testosterone enanthate, TU = testosterone undecanoate.

**eFigure 9: Odds of withdrawals due to adverse events associated with the use of any testosterone v. placebo**

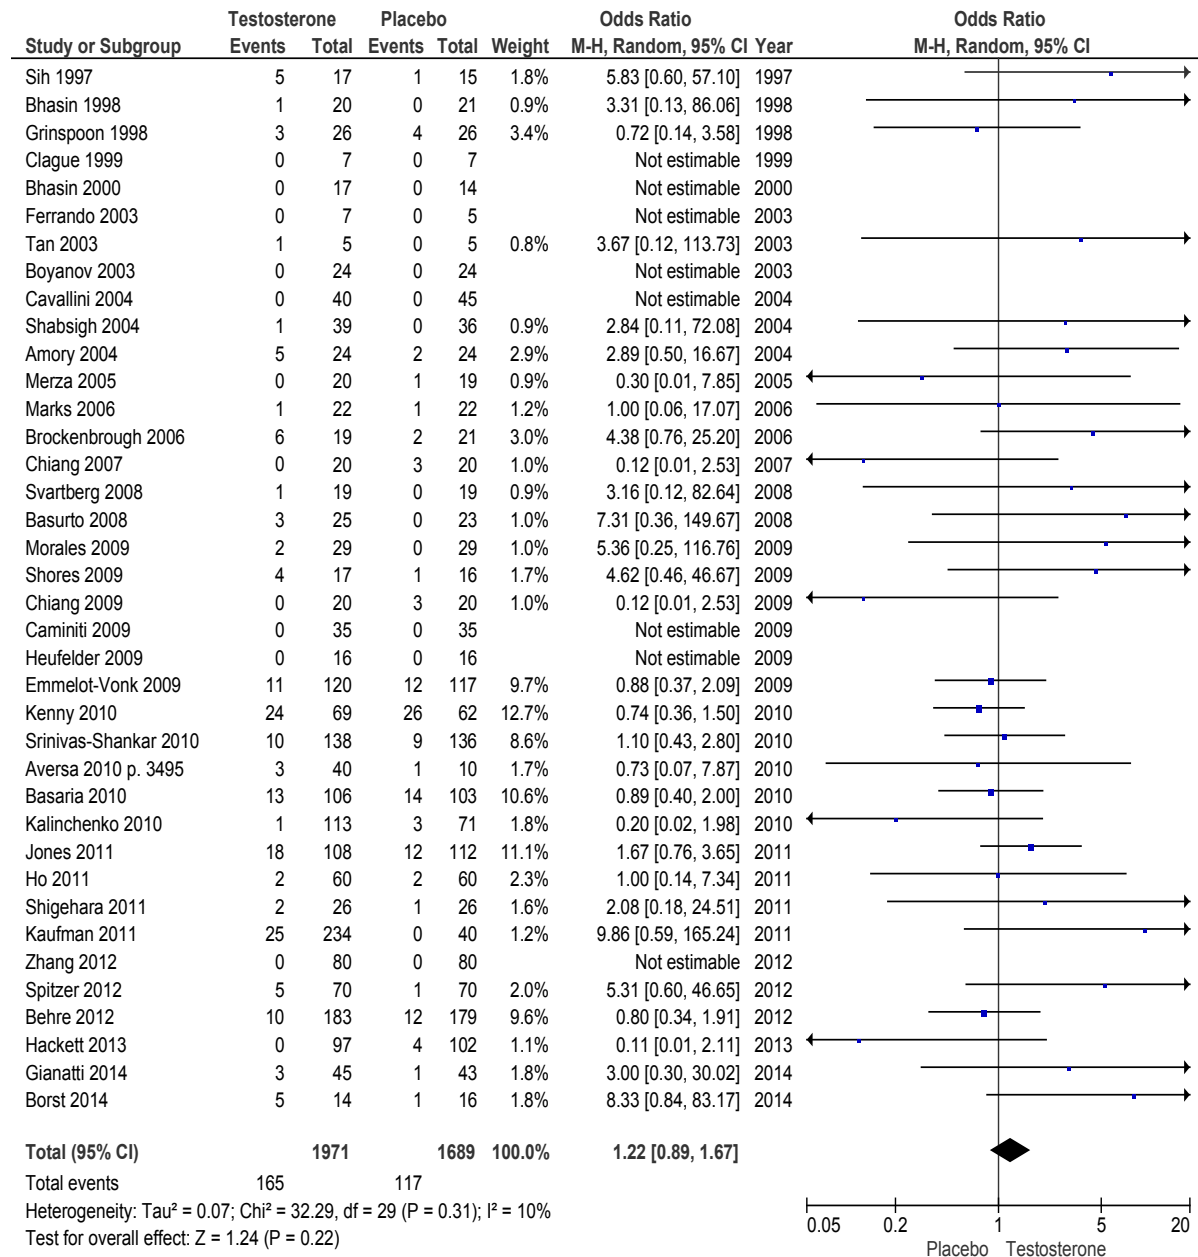

eTable 15: Odds of withdrawals due to adverse events – Bayesian network meta-analysis

|                      | Odds ratio (95% credible interval)    |                        |                                       |                                       |                        |                                       |                                    |                        |                         |                        |                         |                     |                      |                   |                   |                     |                     |                     |                     |                     |                     |                     |  |  |
|----------------------|---------------------------------------|------------------------|---------------------------------------|---------------------------------------|------------------------|---------------------------------------|------------------------------------|------------------------|-------------------------|------------------------|-------------------------|---------------------|----------------------|-------------------|-------------------|---------------------|---------------------|---------------------|---------------------|---------------------|---------------------|---------------------|--|--|
|                      | Placebo                               | Patch, 5 mg/d          | Gel 1%, 5 mg/d                        | Gel 1%, 50 mg/d                       | Gel 1%, 75 mg/d        | Gel 1%, 100 mg/d                      | Gel 1.62%, 40.5 mg/d               | Gel 2%, 60 mg/d        | Oral TU 120 mg/d        | Oral TU 160 mg/d       | Oral TU 120-160 mg/d    | IM TU, 1000 mg/9 wk | IM TU, 1000 mg/12 wk | IM TE, 100 mg/ wk | IM TE, 125 mg/ wk | IM TE, 150 mg/ 2 wk | IM TE, 200 mg/ 2 wk | IM TE, 250 mg/ 3 wk | IM TE, 250 mg/ 4 wk | IM TE, 300 mg/ 3 wk | IM TE, 50-400 mg/wk | IM TC, 200 mg/ 2 wk |  |  |
| Patch, 5 mg/d        | 2.49<br>(0.77, 7.59)                  | —                      |                                       |                                       |                        |                                       |                                    |                        |                         |                        |                         |                     |                      |                   |                   |                     |                     |                     |                     |                     |                     |                     |  |  |
| Gel 1%, 5 mg/d       | 0.82<br>(0.31, 2.30)                  | 0.33<br>(0.08, 1.62)   | —                                     |                                       |                        |                                       |                                    |                        |                         |                        |                         |                     |                      |                   |                   |                     |                     |                     |                     |                     |                     |                     |  |  |
| Gel 1%, 50 mg/d      | 0.89<br>(0.46, 1.64)                  | 0.35<br>(0.11, 1.15)   | 1.08<br>(0.31, 3.32)                  | —                                     |                        |                                       |                                    |                        |                         |                        |                         |                     |                      |                   |                   |                     |                     |                     |                     |                     |                     |                     |  |  |
| Gel 1%, 75 mg/d      | 3.36<br>(0.45, 35.75)                 | 1.36<br>(0.13, 18.27)  | 4.14<br>(0.42, 51.50)                 | 3.83<br>(0.47, 44.57)                 | —                      |                                       |                                    |                        |                         |                        |                         |                     |                      |                   |                   |                     |                     |                     |                     |                     |                     |                     |  |  |
| Gel 1%, 100 mg/d     | 0.81<br>(0.33, 1.84)                  | 0.33<br>(0.09, 1.09)   | 0.99<br>(0.24, 3.46)                  | 0.91<br>(0.33, 2.45)                  | 0.24<br>(0.02, 2.08)   | —                                     |                                    |                        |                         |                        |                         |                     |                      |                   |                   |                     |                     |                     |                     |                     |                     |                     |  |  |
| Gel 1.62%, 40.5 mg/d | <b>11.90</b><br><b>(1.36, 238.20)</b> | 4.75<br>(0.40, 114.80) | <b>14.51</b><br><b>(1.28, 344.40)</b> | <b>13.47</b><br><b>(1.38, 280.10)</b> | 3.54<br>(0.16, 126.10) | <b>15.01</b><br><b>(1.43, 332.00)</b> | —                                  |                        |                         |                        |                         |                     |                      |                   |                   |                     |                     |                     |                     |                     |                     |                     |  |  |
| Gel 2%, 60 mg/d      | 1.64<br>(0.53, 5.04)                  | 0.65<br>(0.14, 3.31)   | 2.00<br>(0.43, 8.47)                  | 1.86<br>(0.52, 6.87)                  | 0.49<br>(0.04, 4.94)   | 2.02<br>(0.52, 8.57)                  | 0.14<br>(0.01, 1.60)               | —                      |                         |                        |                         |                     |                      |                   |                   |                     |                     |                     |                     |                     |                     |                     |  |  |
| Oral TU 120 mg/d     | 0.59<br>(0.01, 13.06)                 | 0.24<br>(0.00, 6.41)   | 0.71<br>(0.01, 18.50)                 | 0.67<br>(0.01, 15.76)                 | 0.16<br>(0.00, 7.20)   | 0.74<br>(0.01, 18.77)                 | 0.05<br>(0.00, 2.33)               | 0.36<br>(0.01, 10.04)  | —                       |                        |                         |                     |                      |                   |                   |                     |                     |                     |                     |                     |                     |                     |  |  |
| Oral TU 160 mg/d     | 1.02<br>(0.38, 2.87)                  | 0.41<br>(0.09, 2.04)   | 1.24<br>(0.30, 5.04)                  | 1.15<br>(0.36, 3.96)                  | 0.30<br>(0.02, 2.91)   | 1.26<br>(0.35, 5.05)                  | <b>0.09</b><br><b>(0.00, 0.94)</b> | 0.62<br>(0.14, 2.91)   | 1.76<br>(0.07, 91.80)   | —                      |                         |                     |                      |                   |                   |                     |                     |                     |                     |                     |                     |                     |  |  |
| Oral TU 120-160 mg/d | 0.54<br>(0.01, 12.85)                 | 0.21<br>(0.00, 6.62)   | 0.65<br>(0.01, 17.48)                 | 0.61<br>(0.01, 15.60)                 | 0.15<br>(0.00, 6.99)   | 0.66<br>(0.01, 18.43)                 | 0.04<br>(0.00, 2.27)               | 0.32<br>(0.01, 9.67)   | 0.92<br>(0.01, 127.20)  | 0.54<br>(0.01, 13.83)  | —                       |                     |                      |                   |                   |                     |                     |                     |                     |                     |                     |                     |  |  |
| IM TU, 1000 mg/9 wk  | 4.35<br>(0.10, 216.80)                | 1.76<br>(0.03, 90.23)  | 5.25<br>(0.11, 289.70)                | 4.97<br>(0.11, 250.40)                | 1.22<br>(0.02, 109.40) | 5.46<br>(0.11, 288.70)                | 0.35<br>(0.00, 29.21)              | 2.64<br>(0.05, 152.30) | 7.67<br>(0.06, 1506.00) | 4.27<br>(0.09, 239.50) | 8.30<br>(0.06, 1647.00) | —                   |                      |                   |                   |                     |                     |                     |                     |                     |                     |                     |  |  |
| IM TU,               | 0.58                                  | 0.23                   | 0.70                                  | 0.66                                  | 0.17                   | 0.72                                  | <b>0.05</b>                        | 0.36                   | 0.98                    | 0.57                   | 1.10                    | 0.13                | —                    |                   |                   |                     |                     |                     |                     |                     |                     |                     |  |  |

Supplemental Online Content: Elliott et al. Testosterone therapy in hypogonadal men: a systematic review and network meta-analysis.

For peer review only - <http://bmjopen.bmj.com/site/about/guidelines.xhtml>





**eTable 16: Summary of harms outcomes reported in non-randomized studies**

| Study                       | Population                                                          | Treatment (no. in group)                                                                                                                                                           | Outcome                                                                                                                                                               | Comments                                                                                                                                                                  |
|-----------------------------|---------------------------------------------------------------------|------------------------------------------------------------------------------------------------------------------------------------------------------------------------------------|-----------------------------------------------------------------------------------------------------------------------------------------------------------------------|---------------------------------------------------------------------------------------------------------------------------------------------------------------------------|
| <b>Retrospective cohort</b> |                                                                     |                                                                                                                                                                                    |                                                                                                                                                                       |                                                                                                                                                                           |
| Vigen 2013                  | Men who underwent coronary angiography at a VA medical centre       | <ul style="list-style-type: none"> <li>No treatment (7486)</li> <li>TRT, dose NR (1223)</li> </ul> Mean follow-up: 840 d                                                           | <ul style="list-style-type: none"> <li>Cardiovascular events*:<br/>HR 1.37, 95% CI 1.21 to 1.56</li> </ul>                                                            | Entry into cohort was based on filling a prescription for TRT (patch, gel, injectable; brands NR). Data reported as TRT v. no TRT. Length of follow-up differed by group. |
| Shores 2012                 | > 40 yr treated at a VA medical center, inpatient or outpatient     | <ul style="list-style-type: none"> <li>No treatment (633)</li> <li>TRT (398)</li> </ul> Duration: 20.2 mo                                                                          | <ul style="list-style-type: none"> <li>Prostate cancer:<br/>No treatment: 13/633 men;<br/>TRT: 7/398 men</li> </ul>                                                   | Data reported as TRT v. no TRT. TRTs included injectable, patch, or gel (brands NR)                                                                                       |
| Rhoden 2006                 | Hypogonadal men with negative prostate biopsy prior to starting TRT | <ul style="list-style-type: none"> <li>IM testosterone, dose and type NR (33)</li> <li>Gel 1%, dose NR (25)</li> </ul> Duration: 12 mo                                             | <ul style="list-style-type: none"> <li>Prostate cancer: 1 case in the IM group</li> </ul>                                                                             |                                                                                                                                                                           |
| Guay 2000                   | Men with ED and primary or secondary hypogonadism                   | <ul style="list-style-type: none"> <li>IM TE, 200–300 mg/2–3 wk (25)</li> <li>Patch, 5 mg/d (16)</li> </ul> Duration: 2–3 mo                                                       | <ul style="list-style-type: none"> <li>Prostate cancer: 3 cases (NR which treatment group the patients belonged to)</li> </ul>                                        |                                                                                                                                                                           |
| <b>Prospective cohort</b>   |                                                                     |                                                                                                                                                                                    |                                                                                                                                                                       |                                                                                                                                                                           |
| Francomano 2014             | Severely obese men (mean BMI 42) with symptoms of hypogonadism      | <ul style="list-style-type: none"> <li>DPE (12)</li> <li>DPE + IM TU, 1000 mg/12 wk (12)</li> </ul> Duration: 54 wk + 24 wk observational period following withdrawal of treatment | <ul style="list-style-type: none"> <li>WAE: zero in both groups</li> <li>SAE: zero in both groups</li> </ul>                                                          |                                                                                                                                                                           |
| Aydogdu 2013                | IHH                                                                 | <ul style="list-style-type: none"> <li>Sustanon, 250 mg/3wk (28)</li> <li>Gel 1%, 50 mg/d (24)</li> </ul> Duration: 24 wk                                                          | <ul style="list-style-type: none"> <li>SAE: zero in all groups</li> </ul>                                                                                             |                                                                                                                                                                           |
| Blick 2013                  | HIV/AIDS                                                            | <ul style="list-style-type: none"> <li>Androgel 1%, gel, 50 mg/d (92)</li> <li>Testim 1%, gel, 50 mg/d (75)</li> </ul> Duration: 12 mo                                             | <ul style="list-style-type: none"> <li>Erythrocytosis: zero in both groups</li> <li>Prostate cancer: zero in both groups</li> <li>WAE: zero in both groups</li> </ul> |                                                                                                                                                                           |
| Aversa 2012                 | Middle-aged men with LOH and MetS                                   | <ul style="list-style-type: none"> <li>No treatment (20)</li> <li>IM TU, 12 wk (40)</li> </ul> Duration: 36 mo                                                                     | <ul style="list-style-type: none"> <li>MI: 1 in control group</li> <li>Erythrocytosis: 4 in TU group</li> </ul>                                                       |                                                                                                                                                                           |
| Dean 2005                   | 21–81 yr                                                            | <ul style="list-style-type: none"> <li>Gel 1%, 50 mg/d (NR)</li> <li>Gel 1%, 100 mg/d (NR)</li> </ul>                                                                              | <ul style="list-style-type: none"> <li>Prostate cancer: 3</li> <li>WAE: 40</li> <li>SAE: 6</li> </ul>                                                                 | Reported only adverse events “judged related to study medication” and that affected >1% of study population.                                                              |

Supplemental Online Content: Elliott et al. Testosterone therapy in hypogonadal men: a systematic review and network meta-analysis.

| Study                 | Population  | Treatment<br>(no. in group)                                                                                                               | Outcome                                                                                                                                                                                                                                                  | Comments                                                                          |
|-----------------------|-------------|-------------------------------------------------------------------------------------------------------------------------------------------|----------------------------------------------------------------------------------------------------------------------------------------------------------------------------------------------------------------------------------------------------------|-----------------------------------------------------------------------------------|
| Total: 371 men        |             |                                                                                                                                           |                                                                                                                                                                                                                                                          |                                                                                   |
| Duration: up to 12 mo |             |                                                                                                                                           |                                                                                                                                                                                                                                                          |                                                                                   |
| Wang<br>2004          | 19–68 yr    | <ul style="list-style-type: none"> <li>• Gel 1%, 50 mg/d (NR)</li> <li>• Gel 1%, 75 mg/d (NR)</li> <li>• Gel 1%, 100 mg/d (NR)</li> </ul> | <ul style="list-style-type: none"> <li>• Prostate cancer: 1 in 75 mg/d group, 2 in 100 mg/d group</li> <li>• Skin reactions: 12 men</li> </ul>                                                                                                           |                                                                                   |
| Total: 163 men        |             |                                                                                                                                           |                                                                                                                                                                                                                                                          |                                                                                   |
| Duration: 36 mo‡      |             |                                                                                                                                           |                                                                                                                                                                                                                                                          |                                                                                   |
| Hajjar<br>1997        | Elderly men | <ul style="list-style-type: none"> <li>• No treatment (27)</li> <li>• IM TE or TC 200mg/2-3 wk (45)</li> </ul>                            | <ul style="list-style-type: none"> <li>• Myocardial infarction: 1 in TRT group</li> <li>• Stroke: No treatment: 1/23; TRT: 1/26</li> <li>• Diabetes: No treatment: 0/23; TRT: 1/26</li> <li>• Erythrocytosis†: No treatment: 0/27; TRT: 11/45</li> </ul> | Safety outcomes were reported based on a subset of people assigned to each group, |

Note: BMI = body mass index, DPE = diet plus exercise, ED = erectile dysfunction, IHH = idiopathic hypogonadotropic hypogonadism, IM = intramuscular injection, LOH = late-onset hypogonadism, MetS = metabolic syndrome, MI = myocardial infarction, NR = not reported, PSA = prostate specific antigen, SAE = serious adverse event, TC = testosterone cypionate, TE = testosterone enanthate, TU = testosterone undecanoate, TRT = testosterone replacement therapy, T = testosterone, VA = Veterans Affairs, WAE = withdrawal due to adverse events.

\*Composite outcome of all-cause mortality, myocardial infarction, and ischemic stroke. MI, stroke and CV death were also reported separately; however the length of observation time differed between groups.

†Reported as polycythemia for the treatment group. Zero count inferred for the control group.

‡ This study was completed after an initial 6-month randomized study for an additional 36 months; participants had a total of 42 months of gel exposure.

PRISMA NMA Checklist of Items to Include When Reporting A Systematic Review Involving a Network Meta-analysis

| Section/Topic             | Item # | Checklist Item                                                                                                                                                                                                                                                                                                                                                                                                                                                                                                                                                                                                                                                                                                                                                                          | Reported on Page # |
|---------------------------|--------|-----------------------------------------------------------------------------------------------------------------------------------------------------------------------------------------------------------------------------------------------------------------------------------------------------------------------------------------------------------------------------------------------------------------------------------------------------------------------------------------------------------------------------------------------------------------------------------------------------------------------------------------------------------------------------------------------------------------------------------------------------------------------------------------|--------------------|
| <b>TITLE</b>              |        |                                                                                                                                                                                                                                                                                                                                                                                                                                                                                                                                                                                                                                                                                                                                                                                         |                    |
| Title                     | 1      | Identify the report as a systematic review <i>incorporating a network meta-analysis (or related form of meta-analysis)</i> .                                                                                                                                                                                                                                                                                                                                                                                                                                                                                                                                                                                                                                                            | p. 1               |
| <b>ABSTRACT</b>           |        |                                                                                                                                                                                                                                                                                                                                                                                                                                                                                                                                                                                                                                                                                                                                                                                         |                    |
| Structured summary        | 2      | Provide a structured summary including, as applicable:<br><b>Background:</b> main objectives<br><b>Methods:</b> data sources; study eligibility criteria, participants, and interventions; study appraisal; and <i>synthesis methods, such as network meta-analysis</i> .<br><b>Results:</b> number of studies and participants identified; summary estimates with corresponding confidence/credible intervals; <i>treatment rankings may also be discussed. Authors may choose to summarize pairwise comparisons against a chosen treatment included in their analyses for brevity.</i><br><b>Discussion/Conclusions:</b> limitations; conclusions and implications of findings.<br><b>Other:</b> primary source of funding; systematic review registration number with registry name. | p. 3               |
| <b>INTRODUCTION</b>       |        |                                                                                                                                                                                                                                                                                                                                                                                                                                                                                                                                                                                                                                                                                                                                                                                         |                    |
| Rationale                 | 3      | Describe the rationale for the review in the context of what is already known, <i>including mention of why a network meta-analysis has been conducted.</i>                                                                                                                                                                                                                                                                                                                                                                                                                                                                                                                                                                                                                              | p. 6               |
| Objectives                | 4      | Provide an explicit statement of questions being addressed, with reference to participants, interventions, comparisons, outcomes, and study design (PICOS).                                                                                                                                                                                                                                                                                                                                                                                                                                                                                                                                                                                                                             | p. 6               |
| <b>METHODS</b>            |        |                                                                                                                                                                                                                                                                                                                                                                                                                                                                                                                                                                                                                                                                                                                                                                                         |                    |
| Protocol and registration | 5      | Indicate whether a review protocol exists and if and where it can be accessed (e.g., Web address); and, if available, provide registration information, including registration number.                                                                                                                                                                                                                                                                                                                                                                                                                                                                                                                                                                                                  | p. 2,5,6           |
| Eligibility criteria      | 6      | Specify study characteristics (e.g., PICOS, length of follow-up) and report characteristics (e.g., years considered, language, publication status) used as criteria for eligibility, giving rationale. <i>Clearly describe eligible treatments included in the treatment network, and note whether any have been clustered or merged into the same node (with justification).</i>                                                                                                                                                                                                                                                                                                                                                                                                       | p. 6-7             |
| Information sources       | 7      | Describe all information sources (e.g., databases with dates of coverage, contact with study authors to identify                                                                                                                                                                                                                                                                                                                                                                                                                                                                                                                                                                                                                                                                        | p. 7               |

Elliott et al: Testosterone therapy in hypogonadal men:  
a systematic review and network meta-analysis

For peer review only - <http://bmjopen.bmj.com/site/about/guidelines.xhtml>

|                                        |           |                                                                                                                                                                                                                                                                                                                                                                                                                        |                   |
|----------------------------------------|-----------|------------------------------------------------------------------------------------------------------------------------------------------------------------------------------------------------------------------------------------------------------------------------------------------------------------------------------------------------------------------------------------------------------------------------|-------------------|
|                                        |           | additional studies) in the search and date last searched.                                                                                                                                                                                                                                                                                                                                                              |                   |
| Search                                 | 8         | Present full electronic search strategy for at least one database, including any limits used, such that it could be repeated.                                                                                                                                                                                                                                                                                          | Online supplement |
| Study selection                        | 9         | State the process for selecting studies (i.e., screening, eligibility, included in systematic review, and, if applicable, included in the meta-analysis).                                                                                                                                                                                                                                                              | p. 7              |
| Data collection process                | 10        | Describe method of data extraction from reports (e.g., piloted forms, independently, in duplicate) and any processes for obtaining and confirming data from investigators.                                                                                                                                                                                                                                             | p. 7              |
| Data items                             | 11        | List and define all variables for which data were sought (e.g., PICOS, funding sources) and any assumptions and simplifications made.                                                                                                                                                                                                                                                                                  | p. 8              |
| <b>Geometry of the network</b>         | <b>S1</b> | Describe methods used to explore the geometry of the treatment network under study and potential biases related to it. This should include how the evidence base has been graphically summarized for presentation, and what characteristics were compiled and used to describe the evidence base to readers.                                                                                                           | p. 8-9            |
| Risk of bias within individual studies | 12        | Describe methods used for assessing risk of bias of individual studies (including specification of whether this was done at the study or outcome level), and how this information is to be used in any data synthesis.                                                                                                                                                                                                 | p. 7-8            |
| Summary measures                       | 13        | State the principal summary measures (e.g., risk ratio, difference in means). <i>Also describe the use of additional summary measures assessed, such as treatment rankings and surface under the cumulative ranking curve (SUCRA) values, as well as modified approaches used to present summary findings from meta-analyses.</i>                                                                                      | p. 8-9            |
| Planned methods of analysis            | 14        | Describe the methods of handling data and combining results of studies for each network meta-analysis. This should include, but not be limited to: <ul style="list-style-type: none"> <li>• <i>Handling of multi-arm trials;</i></li> <li>• <i>Selection of variance structure;</i></li> <li>• <i>Selection of prior distributions in Bayesian analyses; and</i></li> <li>• <i>Assessment of model fit.</i></li> </ul> | p. 8-9            |
| <b>Assessment of Inconsistency</b>     | <b>S2</b> | Describe the statistical methods used to evaluate the agreement of direct and indirect evidence in the treatment network(s) studied. Describe efforts taken to address its presence when found.                                                                                                                                                                                                                        | p. 8-9            |
| Risk of bias across studies            | 15        | Specify any assessment of risk of bias that may affect the cumulative evidence (e.g., publication bias, selective reporting within studies).                                                                                                                                                                                                                                                                           | p. 7-8            |
| Additional analyses                    | 16        | Describe methods of additional analyses if done, indicating which were pre-specified. This may include, but not be limited to, the following: <ul style="list-style-type: none"> <li>• Sensitivity or subgroup analyses;</li> <li>• Meta-regression analyses;</li> </ul>                                                                                                                                               | NA                |

- *Alternative formulations of the treatment network; and*
- *Use of alternative prior distributions for Bayesian analyses (if applicable).*

## RESULTS†

|                                          |    |                                                                                                                                                                                                                                                                                                                                                                                                                                                              |                                 |
|------------------------------------------|----|--------------------------------------------------------------------------------------------------------------------------------------------------------------------------------------------------------------------------------------------------------------------------------------------------------------------------------------------------------------------------------------------------------------------------------------------------------------|---------------------------------|
| Study selection                          | 17 | Give numbers of studies screened, assessed for eligibility, and included in the review, with reasons for exclusions at each stage, ideally with a flow diagram.                                                                                                                                                                                                                                                                                              | p. 10, Figure 1                 |
| <b>Presentation of network structure</b> | S3 | Provide a network graph of the included studies to enable visualization of the geometry of the treatment network.                                                                                                                                                                                                                                                                                                                                            | Fig 3, supplement               |
| <b>Summary of network geometry</b>       | S4 | Provide a brief overview of characteristics of the treatment network. This may include commentary on the abundance of trials and randomized patients for the different interventions and pairwise comparisons in the network, gaps of evidence in the treatment network, and potential biases reflected by the network structure.                                                                                                                            | Supplement (eAppendix 4)        |
| Study characteristics                    | 18 | For each study, present characteristics for which data were extracted (e.g., study size, PICOS, follow-up period) and provide the citations.                                                                                                                                                                                                                                                                                                                 | Supplement (eTable 1,2)         |
| Risk of bias within studies              | 19 | Present data on risk of bias of each study and, if available, any outcome level assessment.                                                                                                                                                                                                                                                                                                                                                                  | Supplement (eTable 3,4)         |
| Results of individual studies            | 20 | For all outcomes considered (benefits or harms), present, for each study: 1) simple summary data for each intervention group, and 2) effect estimates and confidence intervals. <i>Modified approaches may be needed to deal with information from larger networks.</i>                                                                                                                                                                                      | Supplement                      |
| Synthesis of results                     | 21 | Present results of each meta-analysis done, including confidence/credible intervals. <i>In larger networks, authors may focus on comparisons versus a particular comparator (e.g. placebo or standard care), with full findings presented in an appendix. League tables and forest plots may be considered to summarize pairwise comparisons. If additional summary measures were explored (such as treatment rankings), these should also be presented.</i> | p. 9-13, supplement             |
| <b>Exploration for inconsistency</b>     | S5 | Describe results from investigations of inconsistency. This may include such information as measures of model fit to compare consistency and inconsistency models, <i>P</i> values from statistical tests, or summary of inconsistency estimates from different parts of the treatment network.                                                                                                                                                              | p. 10, supplement (eAppendix 5) |
| Risk of bias across studies              | 22 | Present results of any assessment of risk of bias across studies for the evidence base being studied.                                                                                                                                                                                                                                                                                                                                                        | p. 9, Supplement (eTable 3,4)   |
| Results of additional analyses           | 23 | Give results of additional analyses, if done (e.g., sensitivity or subgroup analyses, meta-regression analyses, <i>alternative network geometries studied, alternative choice of prior distributions for Bayesian analyses, and so forth</i> ).                                                                                                                                                                                                              | NA                              |

1  
2  
3  
4  
5  
6  
7  
8  
9  
10  
11  
12  
13  
14  
15  
16  
17  
18  
19  
20  
21  
22  
23  
24  
25  
26  
27  
28  
29  
30  
31  
32  
33  
34  
35  
36  
37  
38  
39  
40  
41  
42  
43  
44  
45  
46  
47  
48  
49  
50  
51  
52  
53  
54  
55  
56  
57  
58  
59  
60**DISCUSSION**

|                     |    |                                                                                                                                                                                                                                                                                                                                                                                                                                |          |
|---------------------|----|--------------------------------------------------------------------------------------------------------------------------------------------------------------------------------------------------------------------------------------------------------------------------------------------------------------------------------------------------------------------------------------------------------------------------------|----------|
| Summary of evidence | 24 | Summarize the main findings, including the strength of evidence for each main outcome; consider their relevance to key groups (e.g., healthcare providers, users, and policy-makers).                                                                                                                                                                                                                                          | p. 13    |
| Limitations         | 25 | Discuss limitations at study and outcome level (e.g., risk of bias), and at review level (e.g., incomplete retrieval of identified research, reporting bias). <i>Comment on the validity of the assumptions, such as transitivity and consistency. Comment on any concerns regarding network geometry (e.g., avoidance of certain comparisons).</i>                                                                            | p. 15    |
| Conclusions         | 26 | Provide a general interpretation of the results in the context of other evidence, and implications for future research.                                                                                                                                                                                                                                                                                                        | p. 15-16 |
| <b>FUNDING</b>      |    |                                                                                                                                                                                                                                                                                                                                                                                                                                |          |
| Funding             | 27 | Describe sources of funding for the systematic review and other support (e.g., supply of data); role of funders for the systematic review. This should also include information regarding whether funding has been received from manufacturers of treatments in the network and/or whether some of the authors are content experts with professional conflicts of interest that could affect use of treatments in the network. | p. 2     |

# BMJ Open

## Testosterone therapy in hypogonadal men: a systematic review and network meta-analysis

|                                 |                                                                                                                                                                                                                                                                                                                                                                                                                                                                                                                                                                                                                                                                                                                                                                                                                                                                                                                                                                                                                                                                                      |
|---------------------------------|--------------------------------------------------------------------------------------------------------------------------------------------------------------------------------------------------------------------------------------------------------------------------------------------------------------------------------------------------------------------------------------------------------------------------------------------------------------------------------------------------------------------------------------------------------------------------------------------------------------------------------------------------------------------------------------------------------------------------------------------------------------------------------------------------------------------------------------------------------------------------------------------------------------------------------------------------------------------------------------------------------------------------------------------------------------------------------------|
| Journal:                        | <i>BMJ Open</i>                                                                                                                                                                                                                                                                                                                                                                                                                                                                                                                                                                                                                                                                                                                                                                                                                                                                                                                                                                                                                                                                      |
| Manuscript ID                   | bmjopen-2016-015284.R1                                                                                                                                                                                                                                                                                                                                                                                                                                                                                                                                                                                                                                                                                                                                                                                                                                                                                                                                                                                                                                                               |
| Article Type:                   | Research                                                                                                                                                                                                                                                                                                                                                                                                                                                                                                                                                                                                                                                                                                                                                                                                                                                                                                                                                                                                                                                                             |
| Date Submitted by the Author:   | 21-Jun-2017                                                                                                                                                                                                                                                                                                                                                                                                                                                                                                                                                                                                                                                                                                                                                                                                                                                                                                                                                                                                                                                                          |
| Complete List of Authors:       | Elliott, Jesse; University of Ottawa Heart Institute; University of Ottawa, School of Epidemiology and Public Health,<br>Kelly, Shannon; Ottawa Hospital Research Institute, Cardiovascular Research Methods Centre; University of Ottawa, School of Epidemiology and Public Health<br>Millar, Adam; Mount Sinai Hospital, University of Toronto<br>Peterson, Joan; Clinical Epidemiology Program, Ottawa Hospital Research Institute<br>Chen, Li; University of Ottawa Heart Institute, Cardiovascular Research Methods Centre<br>Johnston, Amy; Cardiovascular Research Methods Centre, University of Ottawa Heart Institute<br>Kotb, Ahmed; University of Ottawa Heart Institute,<br>Skidmore, Becky; Independent Information Specialist<br>Bai, Zemin; University of Ottawa Heart Institute, Cardiovascular Research Methods Centre<br>Mamdani, Muhammad; St Michael's Hospital, Li Ka Shing Knowledge Institute<br>Wells, George ; University of Ottawa Heart Institute, Cardiovascular Research Methods Centre; University of Ottawa, School of Epidemiology and Public Health |
| <b>Primary Subject Heading</b>: | Epidemiology                                                                                                                                                                                                                                                                                                                                                                                                                                                                                                                                                                                                                                                                                                                                                                                                                                                                                                                                                                                                                                                                         |
| Secondary Subject Heading:      | Sexual health                                                                                                                                                                                                                                                                                                                                                                                                                                                                                                                                                                                                                                                                                                                                                                                                                                                                                                                                                                                                                                                                        |
| Keywords:                       | testosterone, cardiovascular-related adverse events, systematic review, network meta-analysis, benefits, harms                                                                                                                                                                                                                                                                                                                                                                                                                                                                                                                                                                                                                                                                                                                                                                                                                                                                                                                                                                       |
|                                 |                                                                                                                                                                                                                                                                                                                                                                                                                                                                                                                                                                                                                                                                                                                                                                                                                                                                                                                                                                                                                                                                                      |

SCHOLARONE™  
Manuscripts



## Testosterone therapy in hypogonadal men: a systematic review and network meta-analysis

Word count: 3932

Jesse Elliott, Shannon Kelly, Adam Millar, Joan Peterson, Li Chen, Amy Johnston, Ahmed Kotb, Becky Skidmore, Zemin Bai, Muhammad Mamdani, George A Wells

Jesse Elliott MSc,  
Cardiovascular Research Methods Centre, University of Ottawa Heart Institute, 40 Ruskin Street, Ottawa, Ontario, K1Y4W7

Shannon Kelly MSc,  
Cardiovascular Research Methods Centre, University of Ottawa Heart Institute,  
40 Ruskin Street, Ottawa, Ontario, K1Y4W7

Adam C. Millar MD MScCH  
Department of Medicine, Mount Sinai Hospital, University of Toronto, Toronto, Ontario

Joan Peterson BSc,  
Clinical Epidemiology Program, Ottawa Hospital Research Institute, 1053 Carling Avenue, Ottawa, Ontario, K1Y 4E9

Li Chen MSc,  
Cardiovascular Research Methods Centre, University of Ottawa Heart Institute, 40 Ruskin Street, Ottawa, Ontario, K1Y4W7

Amy Johnston MSc,  
Cardiovascular Research Methods Centre, University of Ottawa Heart Institute,  
40 Ruskin Street, Ottawa, Ontario K1Y4W7

Ahmed Kotb MSc,  
Royal College of Surgeons in Ireland, 123 St. Stephen's Green, Dublin, Ireland

Becky Skidmore MLS,  
Independent Information Specialist, Ottawa, Ontario, K1T 3Z2

Zemin Bai MSc,  
Cardiovascular Research Methods Centre, University of Ottawa Heart Institute,  
40 Ruskin Street, Ottawa, Ontario K1Y4W7

Muhammad Mamdani PharmD,  
Li Ka Shing Knowledge Institute, St. Michael's Hospital; Toronto, Ontario M5B1W8

1  
2  
3  
4 George A. Wells PhD, Cardiovascular Research Methods Centre, University of Ottawa Heart Institute, 40  
5 Ruskin Street, Ottawa, Ontario, K1Y4W7  
6  
7

8 **Correspondence to:** GA Wells, gawells@ottawaheart.ca  
9

10 **Funding:** This study was support in part by the Ontario Drug Policy Research Network, which is funded  
11 by a grant from the Ontario Ministry of Health and Long-Term Care Health System Research Fund.  
12  
13

14 **Role of the funding source:** The funding source had no role in the design and conduct of the study;  
15 collection, management, analysis, and interpretation of the data; preparation, review, or approval of the  
16 manuscript; and decision to submit the manuscript for publication.  
17  
18  
19  
20

21 **Transparency:** The guarantor affirms that the manuscript is an honest, accurate, and transparent account  
22 of the study being reported; that no important aspects of the study have been omitted; and that any  
23 discrepancies from the study as planned and registered have been explained.  
24  
25  
26  
27

28 **Ethical approval:** not required.  
29  
30

31 **Data sharing:** No additional data available.  
32  
33

34 **Registration:** PROSPERO number: CRD42014009963  
35  
36

37 **Competing interest statement:** Dr. Mamdani reports receiving honoraria for serving on Advisory  
38 Boards for Astra Zeneca, Bristol-Myers Squibb, Eli Lilly and Company, GlaxoSmithKline, Hoffman La  
39 Roche, Novartis, Novo Nordisk, and Pfizer, outside the submitted work. Ms. Skidmore is a paid  
40 information consultant/contractor to the Ottawa Hospital Heart Institute. No conflicts declared by any  
41 other author.  
42  
43  
44  
45  
46  
47  
48

49 **Contributors:** JE, SK, MM, and GW designed the study. BS developed and executed the search strategy.  
50 JE, SK, JP, AJ, AK, and ZB selected studies for inclusion and extracted data. JE, AK, and LC analyzed  
51 the data. JE, SK, LC, AM, and GW interpreted the data. JE wrote the first draft of the manuscript, which  
52  
53  
54  
55  
56  
57  
58  
59  
60

1  
2  
3  
4 was critically revised for intellectual content by all authors. All authors approved the final version  
5  
6 submitted for publication and agree to be accountable for all aspects of the study.  
7  
8

9  
10 **Keywords:** testosterone, benefits, depression, quality of life, erectile function, libido, harms,  
11 cardiovascular-related adverse events, systematic review, network meta-analysis  
12  
13

14  
15  
16  
17  
18  
19  
20  
21  
22  
23  
24  
25  
26  
27  
28  
29  
30  
31  
32  
33  
34  
35  
36  
37  
38  
39  
40  
41  
42  
43  
44  
45  
46  
47  
48  
49  
50  
51  
52  
53  
54  
55  
56  
57  
58  
59  
60

For peer review only

## ABSTRACT

**Objective:** To assess the relative effects of individual testosterone products among hypogonadal men.

**Design:** Systematic review and network meta-analysis.

**Methods:** We searched MEDLINE, Embase, Cochrane CENTRAL, and grey literature (May 25, 2017) for randomized controlled trials (RCTs) and non-randomized studies (NRS) that involved hypogonadal men given testosterone replacement therapy (TRT) for  $\geq 3$  months. Comparators were placebo, another TRT, or the same product at a different dose. Outcomes were quality of life, depression, libido, erectile function, activities of daily living, and testosterone levels, as well as cardiovascular death, myocardial infarction, stroke, prostate cancer, heart disease, diabetes, serious adverse events, withdrawals due to adverse events, and erythrocytosis. RCT data were pooled via meta-analysis and network meta-analysis. Risk of bias was assessed using Cochrane's Risk of Bias tool (RCTs) and SIGN50 (NRS).

**Results:** 87 RCTs and 51 NRS were included. Most were at high or unclear risk of bias, with short treatment duration and follow-up. When compared as a class against placebo, TRT improved quality of life (standardized mean difference [SMD] -0.26, 95% confidence interval [CI] -0.41,-0.11), libido (SMD 0.33, 95%CI 0.16,0.50), depression (SMD -0.23, 95%CI -0.44,-0.01), and erectile function (SMD 0.25, 95%CI 0.10,0.41). Most individual TRTs were significantly better than placebo at improving libido (6/10). Only one TRT was better than placebo at improving quality of life, and no individual TRTs improved depression or erectile function. There was no increased risk of adverse events, with the exception of withdrawals due to adverse events with the use of some TRTs.

**Conclusion:** Despite a class effect of improving quality of life, depression, erectile function, and libido, major improvements were not observed with the use of any individual product. We observed no statistically significant increase in the risk of adverse events; however, longer-term high-quality trials are needed to fully assess the risk of harm.

1  
2  
3  
4  
5 **Registration:** PROSPERO CRD42014009963  
6  
7  
8

9  
10 **Article Summary**

11 **Strengths and limitations**

- 12  
13  
14 • We performed a comprehensive systematic review of the published and grey literature to identify  
15 randomized and non-randomized studies involving adult men with low testosterone levels  
16  
17  
18 • Although there is no universally agreed on level for the diagnosis of “low” testosterone, we included  
19 only studies that enrolled men with total testosterone  $\leq 12$  nmol/L or free testosterone  $\leq 225$  pmol/L,  
20 consistent with recent guidelines.  
21  
22  
23  
24 • Data from non-randomized studies were poorly reported and were not suitable to pooling via meta-  
25 analysis.  
26  
27  
28  
29 • The included studies were generally at high or unclear risk of bias, and most studies had a relatively  
30 short treatment duration.  
31  
32  
33  
34 • Long-term high-quality studies are needed to more fully assess the risk of rare adverse events.  
35  
36  
37  
38  
39  
40  
41  
42  
43  
44  
45  
46  
47  
48  
49  
50  
51  
52  
53  
54  
55  
56  
57  
58  
59  
60

## Introduction

Testosterone deficiency has well-recognized negative effects on male sexuality and quality of life.<sup>1</sup> Recent clinical practice guidelines recommend testosterone replacement therapy (TRT) for adult men with low testosterone levels (hypogonadal men) with the goal of improving symptoms and elevating testosterone levels into the mid-normal range for young men.<sup>2</sup> However, two large observational studies have reported an increased risk of cardiovascular events with testosterone use,<sup>3,4</sup> and the US Food and Drug Administration (FDA) and Health Canada both have warned of a potential increased risk of cardiovascular events among men using testosterone products.<sup>5,6</sup>

Previous meta-analyses have reported positive effects of TRT compared with placebo, on quality of life,<sup>7</sup> depression,<sup>8,9</sup> and some aspects of sexual function.<sup>10</sup> However, the results of individual trials have been mixed, and there is variation in testosterone formulations and doses.<sup>11</sup> Similarly, previous meta-analyses of potential harms related to TRT have reported contradictory findings.<sup>12-16</sup> A 2013 meta-analysis reported an increased risk of cardiovascular-related events in a mixed population of hypogonadal and eugonadal men<sup>15</sup>; however, others have found no increased risk of cardiovascular outcomes, including myocardial infarction, stroke, or cardiovascular death.<sup>12-14,16</sup>

Because each TRT product has a different formulation and many different dosing strategies exist,<sup>17</sup> it may not be appropriate to group together all testosterone products, as in traditional meta-analyses. In this study, we performed a systematic review to identify randomized controlled trials (RCTs) and non-randomized studies (NRS) involving hypogonadal men, and we used network meta-analysis to compare the relative benefits and harms of each product.

## Methods

This review was registered *a priori* (CRD42014009963) and followed the Cochrane handbook<sup>18</sup> and the PRISMA for Network Meta-Analysis checklist.<sup>19</sup> Our review included RCTs and NRS involving adult

1  
2  
3  
4 men with low testosterone taking any form of TRT compared to placebo, another TRT, or the same  
5  
6 product at a different dose. We did not exclude studies on the basis of reported outcomes.  
7  
8

9  
10 **Patient involvement:** No patients were involved in setting the research question or in developing plans  
11 for design, or implementation of the study. A patient representative was involved in selecting the  
12 outcome measures, and patient groups were given the opportunity to comment on the study protocol. No  
13 patients were asked to advise on the interpretation or writing up of results. There are no plans to  
14 disseminate the results of the research to study participants or the relevant patient community.  
15  
16

17  
18 **Search strategy:** Using the OVID platform, we searched Ovid MEDLINE, Ovid MEDLINE In-Process  
19 & Other Non-Indexed Citations, and Embase Classic+Embase on June 3, 2014. We also searched  
20 CENTRAL in the Cochrane Library on Wiley on the same date. grey literature were searched according  
21 to CADTH's Grey Matters Light.<sup>20</sup>All searches were updated on May 25, 2017.  
22  
23  
24

25 We used controlled vocabulary, including "Testosterone", "Testosterone Congeners" and "Androgens", to  
26 which we applied relevant subheadings "administration & dosage", "analogs & derivatives", "adverse  
27 events" and "therapeutic use", or combined with "Hormone Replacement Therapy." Our keywords  
28 included "testosterone" or "androgen" in combination with means of administration (buccal, cream, gel,  
29 implant, injections, oral, patch, transdermal) or function (replacement, substitute, supplement, therapy,  
30 treatment). We also searched "TRT" and all known names for testosterone replacement products (e.g.,  
31 androgel, Bio-T-Gel, Striant). Truncation, wildcards and proximity operators were incorporated as  
32 appropriate and terminology and syntax were adjusted according to database and platform. The search  
33 strategy is available in eAppendix1.  
34  
35  
36  
37  
38  
39  
40  
41  
42  
43  
44  
45  
46  
47  
48

49 **Study selection:** We included placebo- and active-controlled RCTs and NRS involving adult men ( $\geq 18$   
50 yr) with low testosterone (total testosterone  $\leq 12$  nmol/L or free testosterone  $< 225$  pmol/L) administered  
51 a testosterone product. We excluded studies that artificially suppressed endogenous testosterone, involved  
52 testosterone precursors, or had less than 10 participants. We included studies with a treatment duration of  
53  
54  
55  
56  
57  
58  
59  
60

1  
2  
3  
4 12 weeks or longer, as follow-up is generally recommended for this time point.<sup>2,21</sup> Cross-over trials were  
5 included if the initial period was at least 12 weeks. Titles and abstracts were screened in duplicate (JE,  
6 JP), and the full-text of any potentially relevant record was evaluated (JE, JP, AJ, ZB). Disagreements  
7 were resolved by consensus.  
8  
9

10  
11  
12  
13  
14 **Data extraction and risk of bias:** Data were extracted by one reviewer using piloted standardized  
15 abstraction forms (Distiller SR) and checked by a second reviewer (JE, JP, AJ, AK, ZB). First-period data  
16 were extracted from cross-over trials. Risk of bias was assessed by two reviewers using the Cochrane  
17 Collaboration's risk of bias tool for RCTs or SIGN50 for cohort studies.<sup>22</sup> Disagreements were resolved  
18 by discussion. Publication bias was assessed by visual inspection of funnel plots.  
19  
20  
21  
22  
23

24  
25  
26 **Outcomes:** Outcomes of interest were quality of life, depression, libido, erectile function, activities of  
27 daily living, and total testosterone level (at 3 mo, 6 mo, end of study) (continuous outcomes), as well as  
28 cardiovascular death, myocardial infarction, stroke, prostate cancer, diabetes, heart disease, serious  
29 adverse events, withdrawals due to adverse events, and erythrocytosis (dichotomous outcomes). We  
30 included data for quality of life, depression, erectile function, and libido that had been measured using a  
31 validated scale (eAppendix2), and the direction of each scale was standardized before analysis. A higher  
32 effect estimate (e.g., positive SMD or MD) indicates improvement in libido, erectile function and  
33 testosterone level, and a lower effect estimate indicates improvement in quality of life and depression.  
34 Data from RCTs were included for quality of life, depression, libido, erectile function, and activities of  
35 daily living, and testosterone levels, and data from RCTs and NRS were included for harms outcomes.  
36  
37  
38  
39  
40  
41  
42  
43  
44  
45  
46  
47

48 **Data analysis:** The results of the included NRS are summarized narratively. Meta-analysis and network  
49 meta-analysis involving data from RCTs were performed as described below. We performed meta-  
50 analysis using RevMan (v.5.3; Cochrane Collaboration) and Bayesian network meta-analysis using  
51 WinBUGS (v.1.4.3; MRC Biostatistics Unit). Analyses were based on mean change from baseline for  
52 quality of life, depression, erectile function, libido, and on mean after-treatment values for total  
53  
54  
55  
56  
57  
58  
59  
60



1  
2  
3  
4 testosterone level. The number randomized was used as the denominator for quality of life, depression,  
5 libido, erectile function, and total testosterone level, and the number who received treatment was used for  
6 harms. Two trials<sup>23,24</sup> were removed from the analyses because the data from these trials were outliers for  
7 each outcome and each had a considerable effect on heterogeneity. In an exploratory analysis, we  
8 removed trials enrolling men with major comorbidities (i.e., HIV/AIDS, osteoporosis, metabolic  
9 syndrome, type 2 diabetes, angina, Alzheimer's disease, heart failure, end-stage renal disease).  
10

11 In the network meta-analysis, we used a binomial likelihood model for dichotomous outcomes and a  
12 normal likelihood model for continuous outcomes, allowing for the inclusion of multi-arm trials.<sup>25</sup>  
13

14 Network meta-analyses included all trials that reported each outcome with no restrictions based on  
15 comorbidities. Each dose of an individual testosterone product was included as a separate node in the  
16 evidence networks. A continuity correction was applied to adjust zero events for harm outcomes.  
17

18 Assessment of model fit and choice of model (fixed v. random effects) was based on assessment of the  
19 deviance information criterion and comparison of residual deviance to the number of unconstrained data  
20 points.<sup>25</sup> Results are reported for the random-effects model. We derived point estimates and 95% credible  
21 intervals (CrIs) using the Markov Chain Monte Carlo method. Mean differences (MDs), standardized  
22 mean differences (SMDs) with standard deviations (SDs) or odds ratios (ORs) with 95% CrIs or CIs are  
23 reported for continuous or dichotomous outcomes as appropriate. Vague priors (e.g.,  $N[0, 100^2]$ ) were  
24 assigned for basic parameters throughout.<sup>25</sup> To ensure model convergence, trace plots and Brooks-  
25 Gelman-Rubin statistics were assessed.<sup>26</sup> Three chains were fit for each analysis with at least 20,000  
26 iterations and a burn-in of at least 20,000 iterations. Inconsistency was assessed where possible by  
27 comparing the deviance, between-study variance, and deviance information criterion statistics of the  
28 consistency and inconsistency models.<sup>27</sup> The posterior mean deviance of the individual data points in the  
29 inconsistency model was plotted against the posterior mean deviance in the consistency model.<sup>27</sup> All  
30 network diagrams were constructed using NodeXL.  
31  
32  
33  
34  
35  
36  
37  
38  
39  
40  
41  
42  
43  
44  
45  
46  
47  
48  
49  
50  
51  
52  
53  
54  
55  
56  
57  
58  
59  
60

1  
2  
3  
4 **Role of the funding source:** The funder had no role in study design, data collection, analysis,  
5  
6 interpretation, or writing. All authors had full access to the study data, and the corresponding author had  
7  
8 final responsibility for the decision to submit for publication.  
9  
10

## 11 **Results**

### 12 **Search results and study characteristics**

13  
14 We identified 87 RCTs and 51 NRS published between 1997 and 2017, corresponding to 196 records  
15  
16 (Figure 1, eAppendix 3). Of these, 70 RCTs and 19 NRS reported an outcome of interest (eTable1,2). The  
17  
18 median treatment duration of the RCTs was 6 months (range: 3–36 mo), with mean participant age  
19  
20 ranging between 30 and 78 years (eAppendix 4, eTable1). Most RCTs were placebo controlled (87%),  
21  
22 with 2 treatment groups (89%). Of the included NRS, 10 were retrospective and 9 were prospective  
23  
24 cohorts, with a duration up to 8 years (eTable2). Few RCTs or NRS were at low risk of bias, primarily  
25  
26 because of a lack of details about randomization procedures, allocation concealment, and analysis  
27  
28 populations (eTable3,4). Based on visual inspection of funnel plots, publication bias could not be ruled  
29  
30 out for most outcomes (eAppendix 5).  
31  
32  
33  
34  
35

### 36 **Network consistency**

37  
38 Comparison of the consistency and inconsistency models for libido and total testosterone levels did not  
39  
40 show evidence of inconsistency (eAppendix6). Consistency could not be evaluated for quality of life,  
41  
42 depression, or erectile function because of a lack of closed loops. The full network characteristics and  
43  
44 evidence networks are presented in eAppendix7.  
45  
46  
47  
48

### 49 **Outcomes**

50  
51 **Quality of life:** In total, 23 RCTs (21 placebo-controlled, 2 active-controlled) involving 3090 participants  
52  
53 assessed quality of life. Compared with placebo, treatment with any TRT significantly improved quality  
54  
55 of life (SMD -0.26, 95%CI -0.41,-0.11; n = 2834) with substantial heterogeneity ( $I^2 = 71\%$ ; Figure 2A).  
56  
57  
58  
59  
60

1  
2  
3  
4 To explore this heterogeneity, we excluded RCTs that involved men with major comorbidities. This had  
5 little effect on heterogeneity ( $I^2 = 62\%$ ) or the point estimate (SMD  $-0.17$ , 95%CI  $-0.34, -0.01$ ; Figure  
6  
7  
8  
9 2B).

10  
11 The evidence network for quality of life comprised 23 RCTs, representing 14 treatments in addition to  
12 placebo (Figure 3). Intramuscular (IM) testosterone undecanoate (TU; 1000 mg/12 wk) significantly  
13 improved quality of life relative to placebo (SMD  $-0.48$ , 95%CI  $-0.84, -0.10$ ) and to oral TU (160 mg/d;  
14 SMD  $-0.68$ , 95%CI  $-1.32, -0.02$ ), with no other significant differences among the other treatments (Table  
15  
16  
17  
18  
19  
20  
21  
22  
23  
24  
25  
26  
27  
28  
29  
30  
31  
32  
33  
34  
35  
36  
37  
38  
39  
40  
41  
42  
43  
44  
45  
46  
47  
48  
49  
50  
51  
52  
53  
54  
55  
56  
57  
58  
59  
60  
1). The results were consistent when studies involving men with major comorbidities were removed from  
the network, despite 3 fewer treatments being included in the network (data not shown).

**Depression:** Twelve RCTs (11 placebo-controlled, 1 active controlled) involving 852 participants  
randomized to 9 treatments evaluated depression. Compared with placebo, treatment with any TRT had  
improved depression (SMD  $-0.23$ , 95%CI  $-0.44, -0.01$ ;  $n = 786$ ;  $I^2 = 44\%$ ) (eAppendix 8 [eFigure2A]).  
Removal of trials involving men with major comorbidities did not reduce heterogeneity, and the effect of  
TRT was no longer statistically significant (SMD  $-0.12$ , 95%CI  $-0.49, 0.26$ ;  $I^2 = 56\%$ ) (eFigure2B).

In the network meta-analysis, there were no significant differences in depression for any individual TRT  
compared with placebo or among the treatments (eTable5). Removal of trials involving major  
comorbidities did not alter the results (2 treatments removed; data not shown).

**Libido:** Fourteen RCTs (12 placebo-controlled, 2 active-controlled) involving 3167 patients randomized  
to 10 treatments investigated libido. Compared with placebo, treatment with any TRT significantly  
improved libido (SMD  $0.33$ , 95%CI  $0.16, 0.50$ ;  $I^2 = 74\%$ ;  $n = 2732$ ) (eFigure3A). Removal of trials  
involving men with major comorbidities increased heterogeneity ( $I^2 = 80\%$ ), and the point estimate was  
no longer statistically significant (SMD  $0.19$ , 95%CI  $-0.03, 0.41$ ) (eFigure3B).

1  
2  
3  
4  
5 In the network meta-analysis, most individual treatments significantly improved libido compared with  
6 placebo (6/10 treatments; eTable6). Among the treatments, 1% gel (100 mg/d) was significantly better  
7 than patch (5 mg/d) and oral TU (160 mg/d), and oral TU (120 mg/d) was significantly better than patch  
8 (5 mg/d) and 1% gel (75 mg/d). Oral TU (160 mg/d) was significantly worse than most other TRTs in the  
9 network (8/9 TRTs) (eTable6). Removal of trials involving major comorbidities resulted in the removal of  
10 4 treatments from the network; however, the results were consistent for the remaining treatments (data not  
11 shown).  
12  
13  
14  
15  
16  
17  
18  
19

20  
21 **Erectile function:** 17 RCTs (all placebo-controlled) involving 3165 patients randomized to 9 treatments  
22 evaluated erectile function. Compared with placebo, treatment with any TRT improved erectile function  
23 (SMD 0.25, 95%CI 0.10, 0.41), with substantial heterogeneity ( $I^2 = 74%$ ; eFigure4A). Removing trials  
24 involving men with major comorbidities reduced heterogeneity ( $I^2 = 58%$ ), with no qualitative change to  
25 the point estimate (SMD 0.36, 95%CI 0.21, 0.51; eFigure4B).  
26  
27  
28  
29  
30  
31

32 In the network meta-analysis, there were no significant differences in erectile function between placebo  
33 and any individual TRT or among the treatments (eTable7). Removal of trials involving major  
34 comorbidities did not alter the results (2 treatments removed; data not shown).  
35  
36  
37  
38

39  
40 **Activities of daily living:** One RCT reported no significant difference in activities of daily living among  
41 men with mild cognitive impairment following 6 months of TRT (testosterone gel 50–100 mg/d)  
42 compared with placebo ( $p = 0.31$ ).<sup>28</sup>  
43  
44  
45  
46

47 **Testosterone levels:** In total, 26 and 23 RCTs reported total testosterone levels after 3 or 6 months of  
48 treatment, respectively. End of treatment testosterone levels were reported in 57 RCTs. After 3 or 6  
49 months of treatment, about half of the treatments in each network were associated with significantly  
50 higher total testosterone levels compared with placebo (3 mo: 6/15; 6 mo: 11/18) (eTables 8,9). By the  
51 end of treatment (12 wk to 36 mo), most products were associated with total testosterone above 12  
52  
53  
54  
55  
56  
57  
58  
59  
60

1  
2  
3  
4 nmol/L (26/28 testosterone therapies), and 17 of 28 treatments had significantly higher levels relative to  
5  
6 placebo (eTable10).  
7  
8

9  
10 **Cardiovascular death:** 10 RCTs reported the occurrence of cardiovascular death during the treatment  
11 period, while an additional 9 trials reported that no CV deaths had occurred (18 placebo-controlled  
12 RCTs). Compared with placebo via pair wise meta-analysis, there was no significant difference in the risk  
13 of cardiovascular death between placebo and any TRT (all products grouped together) (OR 2.15, 95% CI  
14 0.72,6.45;  $I^2 = 11\%$ ) (Figure 4; Table 2). Because of the low event rate, network meta-analysis did not  
15 provide robust estimates for this outcome (data not reported).  
16  
17  
18  
19  
20  
21

22  
23 **Other adverse events:** Compared with placebo via meta-analysis, there were no increased odds of  
24 myocardial infarction, stroke, prostate cancer, heart disease, or erythrocytosis with the use of any TRT  
25 product (Table 2; eFigure 6-11). Withdrawals due to adverse events were significantly greater with the  
26 use of any TRT compared with placebo (OR 1.31, 95% CI 0.95, 1.73;  $I^2 = 13\%$ )(eFigure12). No RCTs  
27 reported incident diabetes during the treatment period.  
28  
29  
30  
31  
32  
33

34  
35 Owing to the low event rates for most outcomes, network meta-analysis was only possible for serious  
36 adverse events and withdrawals due to adverse events. In the head-to-head comparison of TRTs, there  
37 was no significant difference in serious adverse events between any TRT and placebo or among the TRTs  
38 (eTable11). Use of testosterone patch (5 mg/d) was associated with an increased odds of withdrawal  
39 compared with placebo and many of the other TRTs (eTable12).  
40  
41  
42  
43  
44  
45

#### 46 47 **Nonrandomized studies**

48  
49 The reporting of harms in the included NRS was generally poor, primarily because of a lack of  
50 transparency around the number of patients assigned to each group, the number of events per group,  
51 and/or the type or dose of TRT (eTable13). In the longest prospective cohort study, involving 656 men  
52 followed for up to 10 years,<sup>29</sup> men who had received IM TU (1000 mg/12 wk) were at lower risk of death  
53  
54  
55  
56  
57  
58  
59  
60

1  
2  
3  
4 (incidence of death: TRT group 0.0092 [95%CI 0.0032,0.0368]; no TRT group 0.1145 [95%CI 0.0746,  
5 0.1756]), with 19 of 21 deaths in the control group attributed to cardiovascular causes and zero of 2  
6 deaths in the TRT group due to cardiovascular causes. Non-fatal MI and non-fatal stroke were also more  
7 deaths in the TRT group due to cardiovascular causes. Non-fatal MI and non-fatal stroke were also more  
8 common in the untreated group than in the TRT group (TRT group: 0 MI, 0 stroke; no TRT group: 26 MI,  
9 30 stroke). In a large retrospective cohort study in the US involving 8808 men dispensed a TRT product  
10 and 35,527 men never dispensed TRT,<sup>30</sup> men in the TRT group were at lower risk of sudden  
11 cardiovascular death (adjusted hazard ratio [aHR] 0.76, 95%CI 0.61, 0.93), acute MI (aHR 0.74; 95%CI  
12 0.63, 0.86), and stroke (aHR 0.64, 95% CI 0.52, 0.80) over a median follow-up time of 3.4 years. In  
13 contrast, an earlier retrospective cohort study involving among men who had undergone angiography  
14 reported that those who had filled a prescription for TRT were at higher risk of an adverse cardiovascular  
15 event (aHR 1.29, 95%CI 1.05,1.15) compared men with no TRT prescription.<sup>3</sup> Concerning the relative  
16 safety of the different TRTs, one retrospective cohort study<sup>31</sup> reported no significant difference in risk  
17 between injection or gel TRT users with low testosterone at baseline for MI (aHR1.64, 95%CI 0.57, 4.69)  
18 stroke (aHR 1.28, 0.27, 6.02), or death (a HR 5.53, 95% CI 0.98, 31.15).

19  
20  
21  
22  
23  
24  
25  
26  
27  
28  
29  
30  
31  
32  
33  
34  
35  
36 Prostate cancer was reported by 10NRS.<sup>29,32-40, 41</sup> In a large prospective registry (Registry of  
37 Hypogonadism in Men) involving 999 newly diagnosed hypogonadal men,<sup>37</sup> there was no statistically  
38 significant difference in the risk of prostate cancer between men who used or did not use TRT (incidence  
39 rate ratio 0.52, 95%CI 0.22, 1.26). Traish and colleagues<sup>29</sup> also reported fewer cases of prostate cancer  
40 among men who received TRT (IM TU) compared with hypogonadal men who did not receive TRT (TU:  
41 7/360 men v. no TRT: 12/296 men) over a median follow-up of 7 years, and Yassin and colleagues<sup>35</sup>  
42 reported positive biopsies for prostate cancer among 16.7% of TRT users compared with 51.9% of non-  
43 users, as well as a lower severity in terms of staging and grading in their prospective study of prostate  
44 cancer among hypogonadal men. Among men with a previous diagnosis of prostate cancer, one small  
45 retrospective cohort study<sup>41</sup> reported no recurrences of prostate cancer among TRT users during the  
46 follow-up period (2630 months). The reporting of outcomes and treatment group in most of the remaining  
47  
48  
49  
50  
51  
52  
53  
54  
55  
56  
57  
58  
59  
60

1  
2  
3  
4 studies was poor: either the group assignment of the men who experienced prostate cancer or the number  
5  
6 of men in each treatment group was not reported in each (eTable13).<sup>38,33,34</sup>  
7  
8

## 9 10 **DISCUSSION**

11 Despite more than 70 years of clinical use, TRT remains a controversial topic. Part of the controversy  
12  
13 may be a result of different actions of the various testosterone preparations. In an attempt to clarify the  
14  
15 benefits and harms of individual testosterone products, we used traditional pair-wise meta-analysis as well  
16  
17 as network meta-analysis, which allows the relative comparison of products that have not been compared  
18  
19 in head-to-head trials. Consistent with most previous meta-analyses,<sup>8,7,10</sup> we found that the use of TRT  
20  
21 improved quality of life, depression, libido, and erectile function, with no increase in cardiovascular death  
22  
23 or other major adverse events.  
24  
25  
26

27  
28 In the head-to-head comparison of individual testosterone treatments, we found no significant differences  
29  
30 among products in their effect on depression or erectile function. For libido, testosterone gel (1%, 100  
31  
32 mg/d) was significantly better than testosterone patch (5 mg/d) and oral TU (160 mg/d). Oral TU (160  
33  
34 mg/d) was significantly worse than most other treatments in the network, including oral testosterone  
35  
36 undecanoate at 120 mg/d. The finding that a lower dose of oral TU was more effective than a higher dose  
37  
38 was unexpected and requires further investigation.  
39  
40

41  
42 Conflicting data exist about the risk of adverse cardiovascular events among TRT users. The FDA and  
43  
44 Health Canada both issued alerts in 2015 based in part on the findings of two observational studies.<sup>3,4</sup> In  
45  
46 their retrospective cohort, Vigen and colleagues<sup>3</sup> included men with low testosterone who had undergone  
47  
48 angiography, reporting an increased risk of a composite cardiovascular outcome that included all-cause  
49  
50 mortality, myocardial infarction, and stroke (aHR 1.29, 95%CI 1.04, 1.58). Most participants in this study  
51  
52 were receiving TRT in the form of a patch (63%) and had significant medical comorbidities, which may  
53  
54 limit generalizability. The retrospective study by Finkle and colleagues<sup>4</sup> did not report the baseline  
55  
56 testosterone level of men in their cohort nor was the cohort restricted to men with androgen deficiency; as  
57  
58  
59  
60

1  
2  
3  
4  
5 such, this study was not eligible for inclusion in our review, but their findings that the risk of non-fatal MI  
6  
7 is increased in the first 90 days following testosterone prescription is concerning. However, other recent  
8  
9 large observational studies have reported a lower risk of cardiovascular death, stroke and MI among TRT  
10  
11 users,<sup>29,30</sup> supporting the findings of earlier observational studies that reported a lower risk of all-cause  
12  
13 death among hypogonadal men using TRT.<sup>40</sup>  
14

15  
16 Previous meta-analyses have also reported contradictory findings concerning the risk of adverse events  
17  
18 among TRT users. One meta-analysis reported an increase risk of cardiovascular adverse events among  
19  
20 men using TRT,<sup>15</sup> while a number of other meta-analyses have found no increased risk of cardiovascular  
21  
22 events among TRT users.<sup>12-14,16,42,43</sup> The meta-analysis by Xu and colleagues<sup>15</sup> involved a broad  
23  
24 composite outcome (cardiac disorder, cardiovascular complaints, cardiovascular events, vascular  
25  
26 disorders) and has been criticized for use of a fixed-effects model: subsequent reanalysis using a random-  
27  
28 effects model found no significant increase in the risk of cardiovascular events.<sup>43</sup> Our findings are  
29  
30 consistent with previous meta-analyses that have found no increased risk of individual cardiovascular  
31  
32 events compared with placebo.<sup>12-14,16,43,42</sup>  
33  
34

35  
36 Although we had intended to analyze the effects of individual testosterone products among men aged 65  
37  
38 years and older, data were limited because most RCTs included a wide age range. The Testosterone Trials  
39  
40 were designed to address the lack of data among elderly men.<sup>44</sup> After one year of treatment with 1%  
41  
42 testosterone gel, improved desire and erectile function were reported among men with low sexual  
43  
44 function at baseline, with no apparent increase in the risk of adverse cardiovascular events.<sup>44</sup> Although  
45  
46 these findings are encouraging, the trials were not powered to detect adverse events, and the results  
47  
48 should not be generalized to different testosterone preparations.  
49  
50

### 51 52 53 **Strengths and limitations** 54 55 56 57 58 59 60



1  
2  
3  
4 The strengths of this study include a comprehensive search of the published and grey literature without  
5 language or date restrictions. In contrast with previous reviews, we included only studies that enrolled  
6 men with total testosterone  $\leq 12$  nmol/L or free testosterone  $\leq 225$  pmol/L. Although there is no  
7  
8  
9  
10  
11  
12  
13  
14  
15  
16  
17  
18  
19  
20  
21  
22  
23  
24  
25  
26  
27  
28  
29  
30  
31  
32  
33  
34  
35  
36  
37  
38  
39  
40  
41  
42  
43  
44  
45  
46  
47  
48  
49  
50  
51  
52  
53  
54  
55  
56  
57  
58  
59  
60

The strengths of this study include a comprehensive search of the published and grey literature without language or date restrictions. In contrast with previous reviews, we included only studies that enrolled men with total testosterone  $\leq 12$  nmol/L or free testosterone  $\leq 225$  pmol/L. Although there is no universally agreed on threshold value for low testosterone, a recent guideline recommends TRT for men with total testosterone lower than 12 nmol/L.<sup>11</sup>

Our study had several limitations. First, the included studies used a variety of assays to determine testosterone levels and a variety of cut-off values for determining “low” testosterone. This has been noted by others.<sup>11,45</sup> The US Centers for Disease Control and Prevention’s Hormone Standardization Project<sup>46</sup> will help to resolve this issue. Second, the included RCTs and NRS were generally at unclear or high risk of bias, which may have had an impact on the reliability of subjective data. Third, the duration of treatment and the length of follow-up may have been too short to see an effect of TRT for all outcomes, including adverse events. In keeping with the recommendation to reassess symptoms after 3 months of TRT,<sup>21</sup> we included only studies with a treatment duration of 3 months or longer. The median duration of treatment was 6 months in the RCTs, but it is possible that some symptoms may take longer to resolve.

## Conclusions

To the best of our knowledge, this is the first study to compare the benefits and harms of individual testosterone products among hypogonadal men. Our study builds on previous meta-analyses by comparing the relative effects of individual testosterone treatments, most of which have never been compared in head-to-head trials. When considered as a class (any TRT compared to placebo), TRT improved quality of life, depression, erectile function, and libido; however, when the individual products were compared head to head, there were few differences between the treatments. We found no increased risk of major harms; however, this must be viewed in light of the high risk of bias of the included studies, the rare nature of serious harms, and the short treatment duration and follow-up of most studies. Future

1  
2  
3  
4 studies need to be rigorous in design and delivery, and include comprehensive descriptions of all aspects  
5  
6 of methodology to further enable appraisal and interpretation of results.  
7  
8

9  
10 **Acknowledgements:** We thank Wenfei Liu for assistance in screening records during the 2015 update of  
11  
12 the literature search.  
13

14  
15  
16  
17  
18  
19  
20  
21  
22  
23  
24  
25  
26  
27  
28  
29  
30  
31  
32  
33  
34  
35  
36  
37  
38  
39  
40  
41  
42  
43  
44  
45  
46  
47  
48  
49  
50  
51  
52  
53  
54  
55  
56  
57  
58  
59  
60

For peer review only

## REFERENCES

1. Morgentaler A, Zitzmann M, Traish AM, et al. Fundamental Concepts Regarding Testosterone Deficiency and Treatment. *Mayo Clin Proc.* 2016;91(7):881-896. doi:10.1016/j.mayocp.2016.04.007.
2. Morales A, Bebb RA, Manjoo P, et al. Diagnosis and management of testosterone deficiency syndrome in men: Clinical practice guideline. *Cmaj.* 2015;187(18):1369-1377. doi:10.1503/cmaj.151208.
3. Vigen R, O'Donnell CI, Baron AE, et al. Association of Testosterone Therapy With Mortality, Myocardial Infarction, and Stroke in Men With Low Testosterone Levels. *JAMA.* 2013;310(17):1829. doi:10.1001/jama.2013.280386.
4. Finkle WD, Greenland S, Ridgeway GK, et al. Increased Risk of Non-Fatal Myocardial Infarction Following Testosterone Therapy Prescription in Men. *PLoS One.* 2014;9(1):1-7. doi:10.1371/journal.pone.0085805.
5. Summary Safety Review – Testosterone Replacement Products Cardiovascular Risk 2014. [www.hc-sc.gc.ca/dhp-mps/medeff/reviews-examens/testosterone-eng.php](http://www.hc-sc.gc.ca/dhp-mps/medeff/reviews-examens/testosterone-eng.php). Accessed August 15, 2016.
6. FDA Drug Safety Communication: FDA cautions about using testosterone products for low testosterone due to aging; requires labeling change to inform of possible increased risk of heart attack and stroke with use. [www.fda.gov/downloads/Drugs/DrugSafety/UCM436270.pdf](http://www.fda.gov/downloads/Drugs/DrugSafety/UCM436270.pdf). Accessed August 15, 2015.
7. Guo C, Gu W, Liu M, et al. Efficacy and safety of testosterone replacement therapy in men with hypogonadism: A meta-analysis study of placebo-controlled trials. *Exp Ther Med.* 2016;11(3):853-863. doi:10.3892/etm.2015.2957.
8. Amanatkar HR, Chibnall JT, Seo B-W, Manepalli JN, Grossberg GT. Impact of exogenous testosterone on mood: a systematic review and meta-analysis of randomized placebo-controlled trials. *Ann Clin Psychiatry.* 2014;26(1):19-32.
9. Zarrouf FA, Artz S, Griffith J, Sirbu C, Kommor M. Testosterone and depression: systematic review and meta-analysis. *J Psychiatr Pract.* 2009;15(4):289-305. doi:10.1097/01.pra.0000358315.88931.fc.
10. Bolona ER, Uruga M V, Haddad RM, et al. Testosterone use in men with sexual dysfunction: a systematic review and meta-analysis of randomized placebo-controlled trials. *Mayo Clin Proc.* 2007;82(1):20-28. doi:10.4065/82.1.20.
11. Isidori AM, Balercia G, Calogero AE, et al. Outcomes of androgen replacement therapy in adult male hypogonadism: Recommendations from the Italian Society of Endocrinology. *J Endocrinol Invest.* 2015;38(1):103-112. doi:10.1007/s40618-014-0155-9.
12. Haddad RM, Kennedy CC, Caples SM, et al. Testosterone and cardiovascular risk in men: a systematic review and meta-analysis of randomized placebo-controlled trials. *Mayo Clin Proc.* 2007;82(1):29-39. doi:10.4065/82.1.29.

13. Fernandez-Balsells MM, Murad MH, Lane M, et al. Clinical review 1: Adverse effects of testosterone therapy in adult men: a systematic review and meta-analysis. *J Clin Endocrinol Metab.* 2010;95(6):2560-2575. doi:10.1210/jc.2009-2575.
14. Calof OM, Singh AB, Lee ML, et al. Adverse events associated with testosterone replacement in middle-aged and older men: a meta-analysis of randomized, placebo-controlled trials. *J Gerontol A Biol Sci Med Sci.* 2005;60(11):1451-1457.
15. Xu L, Freeman G, Cowling BJ, Schooling CM. Testosterone therapy and cardiovascular events among men: a systematic review and meta-analysis of placebo-controlled randomized trials. *BMC Med.* 2013;11:108. doi:10.1186/1741-7015-11-108.
16. Corona G, Maseroli E, Rastrelli G, et al. Cardiovascular risk associated with testosterone-boosting medications: a systematic review and meta-analysis. *Expert Opin Drug Saf.* 2014;13:1327-1351. doi:10.1517/14740338.2014.950653.
17. McGill JJ, Shoskes DA, Sabanegh ES. Androgen deficiency in older men: indications, advantages, and pitfalls of testosterone replacement therapy. *Cleve Clin J Med.* 2012;79:797-806. doi:10.3949/ccjm.79a.12010.
18. Higgins JP, Green S, eds. *Cochrane Handbook for Systematic Reviews of Interventions.*; 2008.
19. Hutton B, Salanti G, Caldwell DM, et al. The PRISMA extension statement for reporting of systematic reviews incorporating network meta-analyses of health care interventions: Checklist and explanations. *Ann Intern Med.* 2015;162(11):777-784. doi:10.7326/M14-2385.
20. Grey matters light.  
[https://www.cadth.ca/sites/default/files/is/cadth\\_Handout\\_greymatters\\_light\\_e.pdf](https://www.cadth.ca/sites/default/files/is/cadth_Handout_greymatters_light_e.pdf). Accessed August 15, 2016.
21. Buvat J, Maggi M, Guay A, Torres LO. Testosterone Deficiency in Men: Systematic Review and Standard Operating Procedures for Diagnosis and Treatment. *J Sex Med.* 2013;10(1):245-284. doi:10.1111/j.1743-6109.2012.02783.x.
22. Sleith C. *Methodology Checklist 3: Cohort Studies.* Edinburgh; 2012. [www.sign.ac.uk/checklists-and-notes.html](http://www.sign.ac.uk/checklists-and-notes.html). Accessed June 12, 2017.
23. Cavallini G, Caracciolo S, Vitali G, Modenini F, Biagiotti G. Carnitine versus androgen administration in the treatment of sexual dysfunction, depressed mood, and fatigue associated with male aging. *Urology.* 2004;63:641-646.  
<http://www.sciencedirect.com/science/article/pii/S0090429503013013>.
24. Zhang XW, Liu ZH, Hu XW, et al. Androgen replacement therapy improves psychological distress and health-related quality of life in late onset hypogonadism patients in Chinese population. *Chin Med J.* 2012;125:3806-3810.
25. Dias S, Sutton A, Welton N, Ades A, Golfinopoulos V, Kyrgiou M. *NICE DSU Technical Support Document 2: Generalised Linear Modelling Framework for Pairwise and Network Meta-Analysis of Randomised Controlled Trials.* [www.nicesu.org.uk/TSD6 Software.final.08.05.12.pdf](http://www.nicesu.org.uk/TSD6%20Software.final.08.05.12.pdf).
26. Spiegelhalter D, Thomas A, Best N, Lunn D. *WinBUGS User Manual.*; 2003. [www.mrc-bsu.cam.ac.uk/wp-content/uploads/manual14.pdf](http://www.mrc-bsu.cam.ac.uk/wp-content/uploads/manual14.pdf).

- 1  
2  
3  
4  
5 27. Dias S, Welton N, Sutton A, Caldwell D, Lu G, Ades A. Evidence synthesis for decision making  
6 4: inconsistency in networks of evidence based on randomized controlled trials. *Med Decis Mak.*  
7 2013;33(5):641-656.
- 8  
9 28. Cherrier MM, Anderson K, Shofer J, Millard S, Matsumoto AM. Testosterone treatment of men  
10 with mild cognitive impairment and low testosterone levels. *Am J Alzheimers Dis Other Demen.*  
11 2015;30(4):421.
- 12  
13 29. Traish AM, Haider A, Haider KS, Doros G, Saad F. Long-Term Testosterone Therapy Improves  
14 Cardiometabolic Function and Reduces Risk of Cardiovascular Disease in Men with  
15 Hypogonadism. 2017;1074248417(United States eISSN - 1940-4034 (Electronic) PT - Journal  
16 Article LG - English DC - 20170419 OVID MEDLINE UP 20170421).
- 17  
18 30. Cheetham TC, An JJ, Jacobsen SJ, et al. Association of testosterone replacement with  
19 cardiovascular outcomes among men with androgen deficiency. *JAMA Intern Med.*  
20 2017;177(4):491.
- 21  
22 31. Layton JB, Meier CR, Sharpless JL, Sturmer T, Jick SS, Brookhart MA. Comparative Safety of  
23 Testosterone Dosage Forms. *JAMA Intern Med.* 2015;175(7):1187.
- 24  
25 32. Blick G. Optimal diagnostic measures and thresholds for hypogonadism in men with HIV/AIDS:  
26 comparison between 2 transdermal testosterone replacement therapy gels. *Postgrad Med.*  
27 2013;125:30-39.
- 28  
29 33. Wang C, Cunningham G, Dobs A, et al. Long-term testosterone gel (AndroGel) treatment  
30 maintains beneficial effects on sexual function and mood, lean and fat mass, and bone mineral  
31 density in hypogonadal men. *J Clin Endocrinol Metab.* 2004;89:2085-2098.
- 32  
33 34. Dean JD, Carnegie C, Rodzvilla J, Smith T. Long-term effects of testim(r) 1% testosterone gel in  
34 hypogonadal men. *Rev. 2005;urol.* 7:87-94.  
35 <http://www.ncbi.nlm.nih.gov/pmc/articles/PMC1477565>.
- 36  
37 35. Yassin A, Salman M, Talib RA, Yassin D-J. Is there a protective role of testosterone against high-  
38 grade prostate cancer? Incidence and severity of prostate cancer in 553 patients who underwent  
39 prostate biopsy: a prospective data register. *Aging Male.* 2017;() (pp) (pp 1-9), 2017. Date of  
40 Publication: 09 Mar 2017.):1.
- 41  
42 36. Jung HJ, Shin HS. Effect of Testosterone Replacement Therapy on Cognitive Performance and  
43 Depression in Men with Testosterone Deficiency Syndrome. 2016;34(3):194.
- 44  
45 37. Debruyne FMJ, Behre HM, Roehrborn CG, et al. Testosterone treatment is not associated with  
46 increased risk of prostate cancer or worsening of lower urinary tract symptoms: prostate health  
47 outcomes in the Registry of Hypogonadism in Men. *BJU Int.* 2017;119(2):216.
- 48  
49 38. Guay AT, Perez JB, Fitaihi WA, Vereb M. Testosterone treatment in hypogonadal men: prostate-  
50 specific antigen level and risk of prostate cancer. *Endocr Pract.* 2000;6:132-138.
- 51  
52 39. Rhoden EL, Morgentaler A. Influence of demographic factors and biochemical characteristics on  
53 the prostate-specific antigen (PSA) response to testosterone replacement therapy. *Int J Impot Res*  
54 *() (pp 201-205), 2006 Date Publ March 2006.* 2006:201-205.
- 55  
56 40. Shores MM, Smith NL, Forsberg CW, Anawalt BD, Matsumoto AM. Testosterone treatment and  
57  
58  
59  
60

- 1  
2  
3  
4 mortality in men with low testosterone levels. *J Clin Endocrinol Metab.* 2012;97:2050-2058.
- 5  
6  
7 41. Pastuszak AW, Gomez LP, Scovell JM, Khara M, Lamb DJ, Lipshultz LI. Comparison of the  
8 Effects of Testosterone Gels, Injections, and Pellets on Serum Hormones, Erythrocytosis, Lipids,  
9 and Prostate-Specific Antigen. *Sex Med.* 2015;3(3):165.
- 10  
11 42. Albert SG, Morley JE. Testosterone therapy, association with age, initiation and mode of therapy  
12 with cardiovascular events: a systematic review. *Clin Endocrinol (Oxf).* 2016;85(3):436-443.  
13 doi:10.1111/cen.13084.
- 14  
15 43. Borst SE, Shuster JJ, Zou B, et al. Cardiovascular risks and elevation of serum DHT vary by route  
16 of testosterone administration: a systematic review and meta-analysis. *BMC Med.*  
17 2014;12(Cv):211. doi:10.1186/s12916-014-0211-5.
- 18  
19 44. Snyder PJ, Bhasin S, Cunningham GR, et al. Effects of Testosterone Treatment in Older Men. *N*  
20 *Engl J Med.* 2016;374(7):611-624. doi:10.1056/NEJMoal506119.
- 21  
22 45. Millar AC, Lau ANC, Tomlinson G, et al. Predicting low testosterone in aging men: a systematic  
23 review. *Can Med Assoc J.* 2016:cmaj.150262. doi:10.1503/cmaj.150262.
- 24  
25 46. *Standardizing Hormone Measurements.*  
26 [https://www.cdc.gov/labstandards/pdf/hs/HoSt\\_Brochure.pdf](https://www.cdc.gov/labstandards/pdf/hs/HoSt_Brochure.pdf).
- 27  
28  
29  
30  
31  
32  
33  
34  
35  
36  
37  
38  
39  
40  
41  
42  
43  
44  
45  
46  
47  
48  
49  
50  
51  
52  
53  
54  
55  
56  
57  
58  
59  
60

1  
2  
3  
4  
5 **Figure legends**  
6

7 **Figure 1: PRISMA flow diagram showing selection of studies.**  
8

9  
10 **Figure 2: Meta-analysis of the effect of testosterone on quality of life.** (A) All randomized controlled  
11 trials (RCTs), and (B) RCTs involving men with no major comorbidities.  
12

13  
14 **Figure 3: Evidence network for quality of life.** The size of each circle (node) is proportional to the  
15 number of randomly assigned patients and indicates sample size. The number of randomized controlled  
16 trials that contributed to each direct comparison is indicated on each line. IM = intramuscular injection,  
17 TC = testosterone cypionate, TE = testosterone enanthate, TU = testosterone undecanoate.  
18  
19  
20  
21  
22  
23  
24

25 **Figure 4: Odds of cardiovascular death associated with the use of any testosterone product v.**  
26 **placebo**  
27  
28  
29  
30  
31  
32  
33  
34  
35  
36  
37  
38  
39  
40  
41  
42  
43  
44  
45  
46  
47  
48  
49  
50  
51  
52  
53  
54  
55  
56  
57  
58  
59  
60

Tables

Table 1: Quality of life – Indirect comparison of testosterone products\*

|                          | Standardized mean difference (95% confidence interval) |                        |                        |                        |                        |                        |                        |                                       |                        |                       |                        |                        |                        |                          |                            |
|--------------------------|--------------------------------------------------------|------------------------|------------------------|------------------------|------------------------|------------------------|------------------------|---------------------------------------|------------------------|-----------------------|------------------------|------------------------|------------------------|--------------------------|----------------------------|
|                          | Placebo                                                | Patch, 5 mg/d          | Gel 1%, 5 mg/d         | Gel 1%, 50 mg/d        | Gel 1%, 75 mg/d        | Gel 1%, 100 mg/d       | Gel 2%, 60 mg/d        | Oral TU, 160 mg/d                     | IM TU, 1000 mg/ 10 wk  | IM TU, 1000 mg/ 12 wk | IM TE, 250 mg/ 3 wk    | IM TE, 250 mg/ 4 wk    | IM TC, 200 mg/ 4 wk    | IM Sustanon, 100 mg/2 wk | IM Durateston, 250 mg/4 wk |
| Patch, 5 mg/d            | -0.33<br>(-0.97, 0.31)                                 | —                      |                        |                        |                        |                        |                        |                                       |                        |                       |                        |                        |                        |                          |                            |
| Gel 1%, 5 mg/d           | -0.11<br>(-0.86, 0.64)                                 | 0.21<br>(-0.78, 1.20)  | —                      |                        |                        |                        |                        |                                       |                        |                       |                        |                        |                        |                          |                            |
| Gel 1%, 50 mg/d          | -0.32<br>(-0.74, 0.17)                                 | 0.01<br>(-0.76, 0.82)  | -0.20<br>(-1.05, 0.69) | —                      |                        |                        |                        |                                       |                        |                       |                        |                        |                        |                          |                            |
| Gel 1%, 75 mg/d          | -0.24<br>(-0.83, 0.34)                                 | 0.09<br>(-0.78, 0.95)  | -0.12<br>(-1.09, 0.82) | 0.08<br>(-0.70, 0.79)  | —                      |                        |                        |                                       |                        |                       |                        |                        |                        |                          |                            |
| Gel 1%, 100 mg/d         | -0.19<br>(-0.94, 0.55)                                 | 0.13<br>(-0.84, 1.10)  | -0.08<br>(-1.13, 0.97) | 0.12<br>(-0.78, 0.96)  | 0.04<br>(-0.89, 0.99)  | —                      |                        |                                       |                        |                       |                        |                        |                        |                          |                            |
| Gel 2%, 60 mg/d          | -0.29<br>(-1.01, 0.44)                                 | 0.04<br>(-0.93, 1.00)  | -0.17<br>(-1.21, 0.87) | 0.03<br>(-0.85, 0.86)  | -0.05<br>(-0.96, 0.89) | -0.09<br>(-1.12, 0.94) | —                      |                                       |                        |                       |                        |                        |                        |                          |                            |
| Oral TU, 160 mg/d        | 0.20<br>(-0.33, 0.74)                                  | 0.53<br>(-0.30, 1.36)  | 0.32<br>(-0.61, 1.24)  | 0.52<br>(-0.21, 1.19)  | 0.44<br>(-0.34, 1.24)  | 0.40<br>(-0.51, 1.31)  | 0.49<br>(-0.41, 1.38)  | —                                     |                        |                       |                        |                        |                        |                          |                            |
| IM TU, 1000 mg/10 wk     | -0.21<br>(-0.96, 0.56)                                 | 0.12<br>(-0.87, 1.13)  | -0.09<br>(-1.15, 0.98) | 0.11<br>(-0.80, 0.98)  | 0.03<br>(-0.92, 1.00)  | -0.01<br>(-1.07, 1.06) | 0.08<br>(-0.97, 1.14)  | -0.41<br>(-1.35, 0.53)                | —                      |                       |                        |                        |                        |                          |                            |
| IM TU, 1000 mg/12 wk     | <b>-0.48</b><br><b>(-0.84, -0.10)</b>                  | -0.15<br>(-0.89, 0.60) | -0.36<br>(-1.19, 0.48) | -0.16<br>(-0.76, 0.41) | -0.24<br>(-0.91, 0.47) | -0.28<br>(-1.10, 0.55) | -0.19<br>(-1.00, 0.62) | <b>-0.68</b><br><b>(-1.32, -0.02)</b> | -0.27<br>(-1.12, 0.58) | —                     |                        |                        |                        |                          |                            |
| IM TE, 250 mg/3 wk       | -0.05<br>(-1.04, 0.94)                                 | 0.28<br>(-0.47, 1.03)  | 0.07<br>(-1.17, 1.30)  | 0.27<br>(-0.85, 1.33)  | 0.19<br>(-0.95, 1.34)  | 0.15<br>(-1.09, 1.37)  | 0.24<br>(-1.00, 1.46)  | -0.25<br>(-1.38, 0.88)                | 0.16<br>(-1.10, 1.40)  | 0.43<br>(-0.63, 1.49) | —                      |                        |                        |                          |                            |
| IM TE, 250 mg/4 wk       | 0.08<br>(-0.44, 0.63)                                  | 0.41<br>(-0.41, 1.26)  | 0.20<br>(-0.72, 1.13)  | 0.40<br>(-0.32, 1.09)  | 0.32<br>(-0.44, 1.13)  | 0.28<br>(-0.62, 1.21)  | 0.37<br>(-0.51, 1.28)  | -0.12<br>(-0.86, 0.66)                | 0.29<br>(-0.64, 1.22)  | 0.56<br>(-0.09, 1.22) | 0.13<br>(-0.97, 1.27)  | —                      |                        |                          |                            |
| IM TC, 200 mg/4 wk       | 0.12<br>(-1.00, 1.25)                                  | 0.45<br>(-0.83, 1.74)  | 0.24<br>(-1.10, 1.59)  | 0.44<br>(-0.78, 1.64)  | 0.36<br>(-0.89, 1.63)  | 0.32<br>(-1.03, 1.66)  | 0.41<br>(-0.92, 1.74)  | -0.08<br>(-1.32, 1.18)                | 0.33<br>(-1.01, 1.68)  | 0.60<br>(-0.46, 1.67) | 0.17<br>(-1.32, 1.66)  | 0.04<br>(-1.20, 1.28)  | —                      |                          |                            |
| IM Sustanon, 100 mg/2 wk | -0.28<br>(-1.17, 0.62)                                 | 0.05<br>(-1.05, 1.14)  | -0.16<br>(-1.32, 1.01) | 0.04<br>(-0.99, 1.02)  | -0.04<br>(-1.10, 1.03) | -0.08<br>(-1.24, 1.09) | 0.01<br>(-1.13, 1.16)  | -0.48<br>(-1.52, 0.57)                | -0.07<br>(-1.24, 1.11) | 0.20<br>(-0.77, 1.16) | -0.23<br>(-1.56, 1.11) | -0.36<br>(-1.42, 0.67) | -0.40<br>(-1.84, 1.02) | —                        |                            |
| IM Durateston 250 mg/4wk | -0.37<br>(-1.49, 0.74)                                 | -0.05<br>(-1.33, 1.24) | -0.26<br>(-1.61, 1.09) | -0.06<br>(-1.27, 1.12) | -0.14<br>(-1.37, 1.13) | -0.18<br>(-1.51, 1.16) | -0.08<br>(-1.40, 1.23) | -0.57<br>(-1.81, 0.66)                | -0.17<br>(-1.52, 1.17) | 0.10<br>(-0.95, 1.15) | -0.33<br>(-1.81, 1.17) | -0.46<br>(-1.70, 0.76) | -0.50<br>(-1.52, 0.52) | -0.10<br>(-1.52, 1.33)   | —                          |

Note: IM = intramuscular injection, TC = testosterone cypionate, TE = testosterone enanthate, TU = testosterone undecanoate.

\*Random-effects model, with analysis based on mean change from baseline. A negative standardized mean difference indicates improvement in quality of life. Statistically significant changes are indicated by use of bold and colour (green indicates that the row treatment is significantly better than the column treatment, red indicates that the row treatment is significantly worse than the column treatment). White indicates no significant difference between treatments.



1  
2  
3  
4  
5  
6  
7  
8  
9  
10  
11  
12  
13  
14  
15  
16  
17  
18  
19  
20  
21  
22  
23  
24  
25  
26  
27  
28  
29  
30  
31  
32  
33  
34  
35  
36  
37  
38  
39  
40  
41  
42  
43  
44  
45  
46  
47  
48  
49

**Table 2: Meta-analysis of adverse events associated with the use of any testosterone compared with placebo**

| Outcome                           | No. of RCTs | Treatment duration | Event/no. treated                  | Odds ratio (95% CI)* | I <sup>2</sup> |
|-----------------------------------|-------------|--------------------|------------------------------------|----------------------|----------------|
| Cardiovascular death              | 18          | 12 wk to 36 mo     | Placebo: 4/1851<br>TRT: 9/2088     | 2.15 (0.72, 6.45)    | 11%            |
| Myocardial infarction             | 15          | 12 wk to 36 mo     | Placebo: 10/1613<br>TRT: 6/1915    | 0.43 (0.15, 1.19)    | 34%            |
| Prostate cancer                   | 13          | 12 wk to 36 mo     | Placebo: 11/1649<br>TRT: 12/1877   | 0.97 (0.43, 2.23)    | 0%             |
| Stroke                            | 8           | 12 wk to 36 mo     | Placebo: 8/1103<br>TRT: 8/1104     | 0.99 (0.37, 2.65)    | 29%            |
| Heart disease                     | 3           | 40 wk to 12 mo     | Placebo: 5/120<br>TRT: 5/131       | 0.89 (0.24 to 3.26)  | 0%             |
| Erythrocytosis                    | 4           | 12 wk to 12 mo     | Placebo: 0/78<br>TRT: 4/110        | 2.44 (0.26, 22.53)   | 0%             |
| Diabetes                          | 0           | —                  | —                                  | —                    | —              |
| Serious adverse events            | 18          | 12 wk to 36 mo     | Placebo: 181/1902<br>TRT: 168/2138 | 0.88 (0.70, 1.11)    | 0%             |
| Withdrawals due to adverse events | 48          | 12 wk to 36 mo     | Placebo: 150/2551<br>TRT: 221/2840 | 1.31 (0.98, 1.73)    | 13%            |

Note: CI = confidence interval, TRT = testosterone replacement therapy.  
\*Random-effects models.

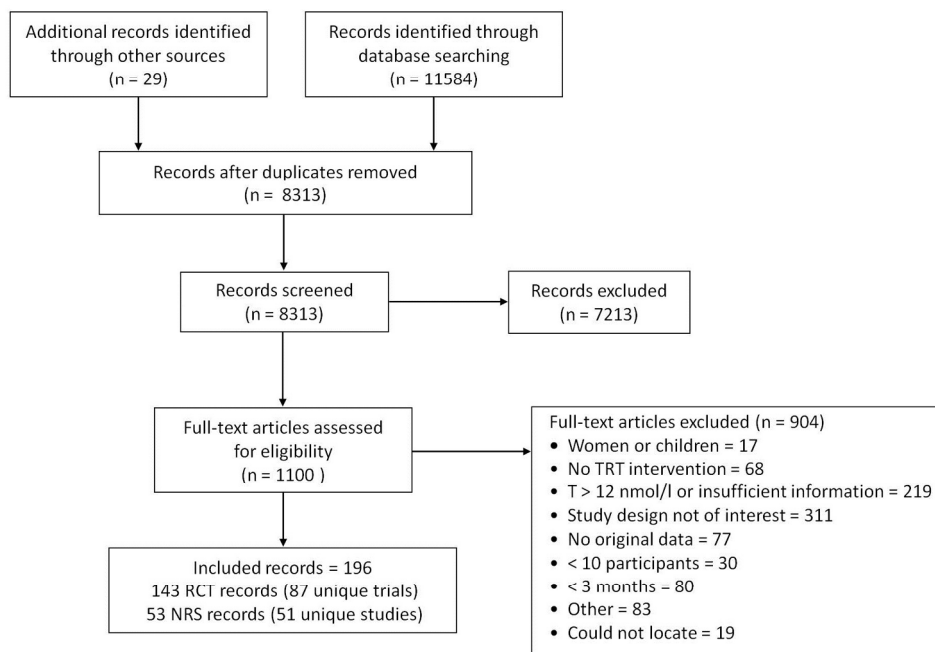

PRISMA flow diagram showing selection of studies.

165x117mm (300 x 300 DPI)

Review only

1  
2  
3  
4  
5  
6  
7  
8  
9  
10  
11  
12  
13  
14  
15  
16  
17  
18  
19  
20  
21  
22  
23  
24  
25  
26  
27  
28  
29  
30  
31  
32  
33  
34  
35  
36  
37  
38  
39  
40  
41  
42  
43  
44  
45  
46  
47  
48  
49  
50  
51  
52  
53  
54  
55  
56  
57  
58  
59  
60

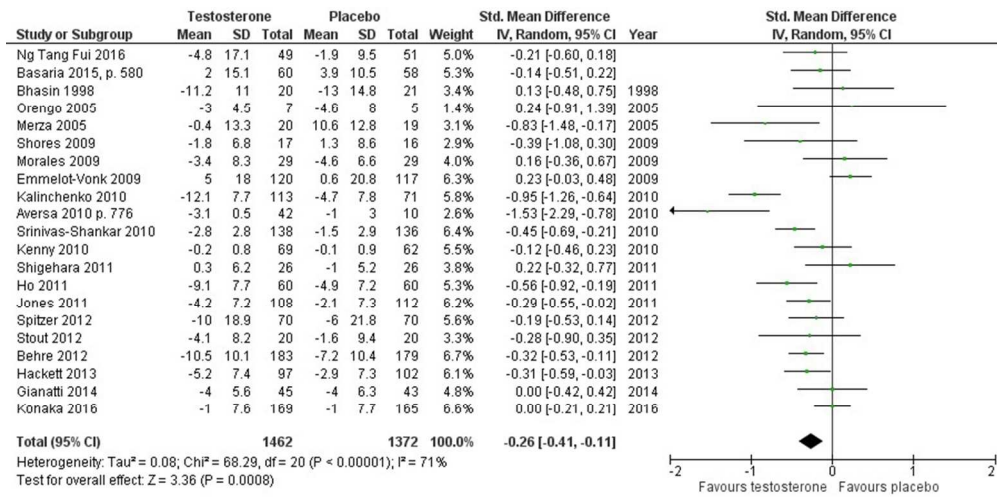

Meta-analysis of the effect of testosterone on quality of life. (A) All randomized controlled trials (RCTs), and (B) RCTs involving men with no major comorbidities.

76x37mm (300 x 300 DPI)

review only

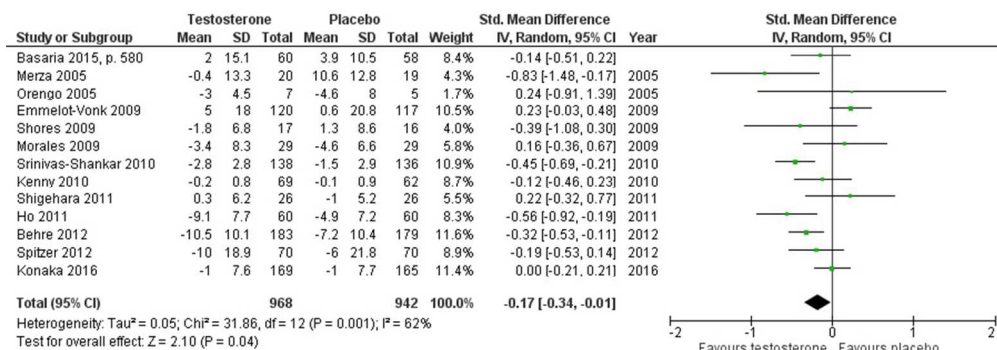

Meta-analysis of the effect of testosterone on quality of life. (A) All randomized controlled trials (RCTs), and (B) RCTs involving men with no major comorbidities.

76x27mm (300 x 300 DPI)

Peer review only

1  
2  
3  
4  
5  
6  
7  
8  
9  
10  
11  
12  
13  
14  
15  
16  
17  
18  
19  
20  
21  
22  
23  
24  
25  
26  
27  
28  
29  
30  
31  
32  
33  
34  
35  
36  
37  
38  
39  
40  
41  
42  
43  
44  
45  
46  
47  
48  
49  
50  
51  
52  
53  
54  
55  
56  
57  
58  
59  
60

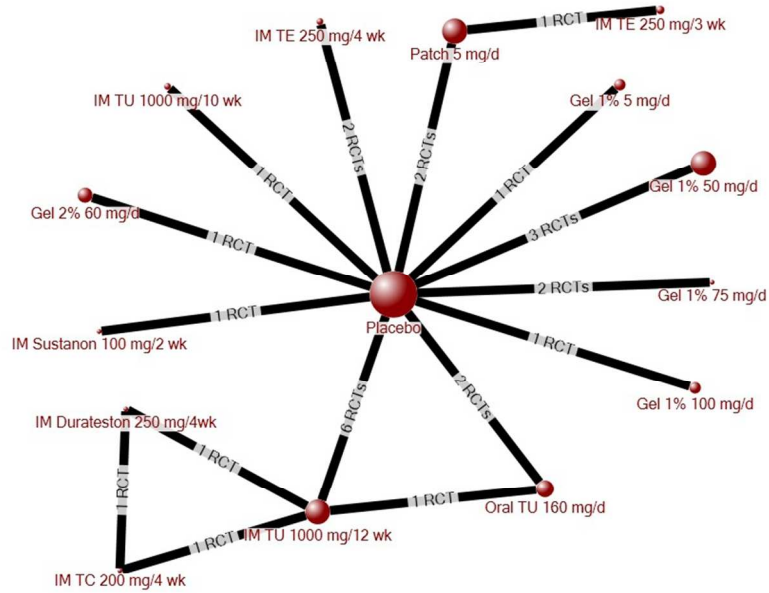

Figure 3: Evidence network for quality of life. The size of each circle (node) is proportional to the number of randomly assigned patients and indicates sample size. The number of randomized controlled trials that contributed to each direct comparison is indicated on each line. IM = intramuscular injection, TC = testosterone cypionate, TE = testosterone enanthate, TU = testosterone undecanoate.

89x57mm (300 x 300 DPI)

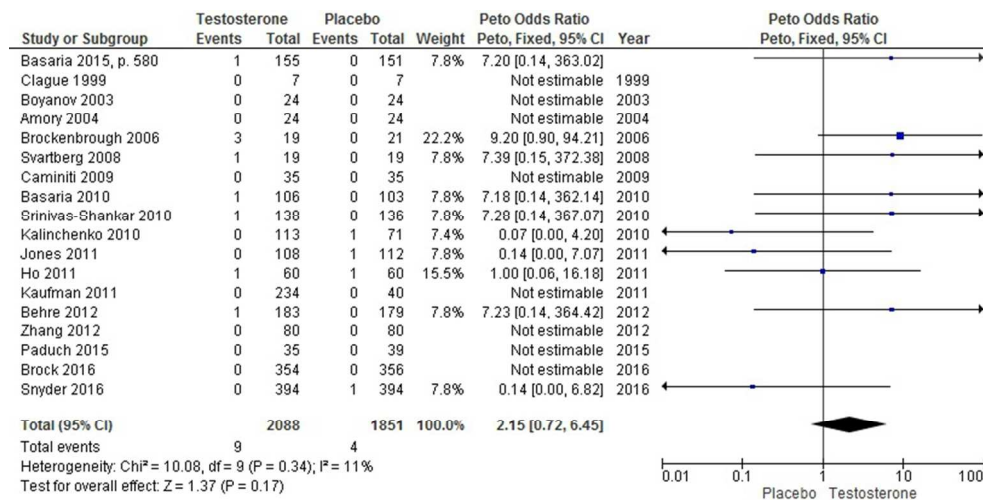

Odds of cardiovascular death associated with the use of any testosterone product v. placebo

70x35mm (300 x 300 DPI)

review only

## Supplementary Online Content:

### Elliott et al. Testosterone replacement therapies in hypogonadal men: a systematic review and network meta-analysis

#### Appendix 1: Search strategy

The search was originally executed on June 3, 2014 and updated May 25, 2017.

Testosterone Replacement Therapy  
Primary Studies - Final Strategies  
2014 Jun 3

Database: Embase Classic+Embase <1947 to 2014 June 02>, Ovid MEDLINE(R) In-Process & Other Non-Indexed Citations and Ovid MEDLINE(R) <1946 to Present> Search Strategy:

- 
- 1 exp Testosterone/aa, ad, ae, tu (9143)
  - 2 Testosterone Congeners/ad, ae, tu (391)
  - 3 exp Testosterone/ and Hormone Replacement Therapy/ (4361)
  - 4 exp Androgens/ and Hormone Replacement Therapy/ (5792)
  - 5 (testosteron\* adj3 (replac\* or substitut\* or supplement\* or therap\* or treatment\* or buccal or cream\$1 or gel or gels or implant\* or inject\* or oral\* or patch\* or transdermal\*)).tw. (20369)
  - 6 (androgen\* adj (replac\* or substitut\* or supplement\* or therap\* or treatment\* or cream\$1 or gel or gels or implant\* or inject\* or patch\*)).tw. (6312)
  - 7 (androgen\* adj3 (buccal\* or oral\* or transdermal\*)).tw. (632)
  - 8 TRT.tw. (2125)
  - 9 (testosterone adj (beta cyclopentylpropionate or cyclopentylpropionate or cipionate or cypionate or enanthate or enanthane or ethanate or heptonate or heptylate or oenanthate or undecanoate or undecylate or "17 undecylate")).tw. (2636)
  - 10 ("8-Isotestosterone" or andriol or "andro 100" or "androgyn LA" or androderm or androfort or androgel or androlin or andronaq or andropatch or androsorb or androstenolone or androtardyl or androtest or androtrop or andrusol or axiron).tw. (1095)
  - 11 ("Bio-T-Gel" or Ciclosterone or "Cristerona T" or "Cristerone T" or CompleoTRT or "CP 601B" or Delatestryl or Depandro or Deposteron or Depostomead or Depo-Testosterone or Depotest or Depovirin or Depoviron or Delatestryl or Duratest or Durathate or Everone or "first-testosterone" or Fortesta or Rortigel or Hexanecarboxylate or Histerone or Homosteron\* or Intrinsa or Jenasteron or LibiGel or Livensa or Malerone or Malogen or Malogex or Mertestate).tw. (492)
  - 12 (Nasobol or Nebido or "Neo-Hombreol F" or "Neo-testis" or Neotestis or "NSC 9700" or Ofterone or Oreton or "Oreton-F" or Orquisteron).tw. (292)
  - 13 (Pantestone or Perandren or Percutacrine androgenique or Percutacrine androgine or Pertestis or Primotest or Primoteston or Relibra or Restandol or Sterotate or Striant or Sustanon\$1 or "Sustason 250" or Synandrol).tw. (674)
  - 14 (Teslen or "Testa-C" or Testamone or Testandron or Testaqua or Testosterone or Testex or Testiculosterone or Testim or Testo Enant or Testobase or Testoderm or Testogel or Testoject-50 or Testolin or Testoluton or Testopel or Testopropon or Testosteroid).tw. (691)
  - 15 (Testostosterone or Testoviron or Testrin or Testro or Testrone or Theramex or Tostrelle or Testryl or Tostrex or Trans-Testosterone).tw. (604)
  - 16 (UNII-3XMK78S470 or Undestor or Virilon or Virormone or Virosterone or Vogelxo).tw. (61)
  - 17 or/1-16 (39453)
  - 18 exp Animals/ not (exp Animals/ and Humans/) (8702141)
  - 19 17 not 18 (25517)
  - 20 (controlled clinical trial or randomized controlled trial).pt. (457659)
  - 21 clinical trials as topic.sh. (169995)
  - 22 (randomi#ed or randomly or RCT\$1 or placebo\*).tw. (1423548)
  - 23 ((singl\* or doubl\* or trebl\* or tripl\*) adj (mask\* or blind\* or dumm\*)).tw. (296647)
  - 24 trial.ti. (292735)
  - 25 or/20-24 (1829141)
  - 26 19 and 25 (3594)
  - 27 (comment or editorial or interview or letter or news).pt. (2802584)
  - 28 26 not 27 (3546)
  - 29 (control\* adj2 trial\*).tw. (323672)
  - 30 (nonrandom\* or non-random\* or quasi-random\* or quasi-experiment\*).tw. (73609)
  - 31 (nRCT or nRCTs or non-RCT\$1).tw. (647)
  - 32 (control\* adj3 ("before and after" or "before after")).tw. (6046)
  - 33 time series.tw. (33994)
  - 34 (pre- adj3 post-).tw. (110642)
  - 35 (pretest adj3 posttest).tw. (6260)

Supplemental Online Content: Elliott et al. Testosterone therapy in hypogonadal men:  
a systematic review and network meta-analysis.

For peer review only - <http://bmjopen.bmj.com/site/about/guidelines.xhtml>

36 (control\* adj2 stud\$3).tw. (346641)  
 37 Control Groups/ (74764)  
 38 (control\$ adj2 group\$1).tw. (752277)  
 39 or/29-38 (1509227)  
 40 19 and 39 (2115)  
 41 40 not 27 (2097)  
 42 exp Cohort Studies/ (1517558)  
 43 cohort\$1.tw. (675350)  
 44 Retrospective Studies/ (837256)  
 45 (longitudinal or prospective or retrospective).tw. (1721897)  
 46 ((followup or follow-up) adj (study or studies)).tw. (89267)  
 47 Observational study.pt. (2469)  
 48 (observation\$2 adj (study or studies)).tw. (111012)  
 49 ((population or population-based) adj (study or studies or analys#s)).tw. (26131)  
 50 ((multidimensional or multi-dimensional) adj (study or studies)).tw. (187)  
 51 Comparative Study.pt. (1676994)  
 52 ((comparative or comparison) adj (study or studies)).tw. (185742)  
 53 or/42-52 (4729450)  
 54 19 and 53 (3389)  
 55 54 not 27 (3352)  
 56 28 or 41 or 55 (6587)  
 57 56 use prmz (3219) [ALL MEDLINE RECORDS]  
 58 28 use prmz (1720) [MEDLINE RCTS]  
 59 41 use prmz (845) [MEDLINE NON-RCTS]  
 60 55 use prmz (1837) [MEDLINE OBSERV]  
 61 androgen therapy/ (3539)  
 62 androgen deficiency/dt (507)  
 63 testosterone undecanoate/ (1591)  
 64 testosterone cipionate/ (871)  
 65 testosterone enantate/ (2439)  
 66 (testosteron\* adj3 (replac\* or substitut\* or supplement\* or therap\* or treatment\* or buccal or cream\$1 or gel or gels or implant\* or inject\* or oral\* or patch\* or transdermal\*)).tw. (20369)  
 67 (androgen\* adj (replac\* or substitut\* or supplement\* or therap\* or treatment\* or cream\$1 or gel or gels or implant\* or inject\* or patch\*)).tw. (6312)  
 68 (androgen\* adj3 (buccal\* or oral\* or transdermal\*)).tw. (632)  
 69 TRT.tw. (2125)  
 70 (testosterone adj (beta cyclopentylpropionate or cyclopentylpropionate or cipationate or cypionate or enanthate or enanthane or ethanate or heptonate or heptylate or oenanthate or undecanoate or undecylate or "17 undecylate")).tw. (2636)  
 71 ("8-Isotestosterone" or andriol or "andro 100" or "androgyn LA" or androderm or androfort or androgel or androlin or andronaq or andropatch or androsorb or androstenolone or androtardyl or androtest or androtop or andrusol or axiron).tw. (1095)  
 72 ("Bio-T-Gel" or Ciclosterone or "Cristerona T" or "Cristerone T" or CompleoTRT or "CP 601B" or Delatestryl or Depandro or Deposteron or Depostomead or Depo-Testosterone or Depotest or Depovirin or Depoviron or Delatestryl or Duratest or Durathate or Everone or "first-testosterone" or Fortesta or Rortigel or Hexanecarboxylate or Histerone or Homosteron\* or Intrinsa or Jenasteron or LibiGel or Livensa or Malerone or Malogen or Malogex or Mertestate).tw. (492)  
 73 (Nasobol or Nebido or "Neo-Hombreol F" or "Neo-testis" or Neotestis or "NSC 9700" or Ofterone or Oreton or "Oreton-F" or Orquisteron).tw. (292)  
 74 (Pantestone or Perandren or Percutacrine androgenique or Percutacrine androgine or Pertestis or Primotest or Primoteston or Relibra or Restandol or Sterotate or Striant or Sustanon\$1 or "Sustason 250" or Synandrol).tw. (674)  
 75 (Teslen or "Testa-C" or Testamone or Testandrone or Testaqua or Testerone or Testex or Testiculosterone or Testim or Testo Enant or Testobase or Testoderm or Testogel or Testoject-50 or Testolin or Testoluton or Testopel or Testopropon or Testosteroid).tw. (691)  
 76 (Testostosterone or Testoviron or Testrin or Testro or Testrone or Theramex or Tostrelle or Testryl or Tostrex or Trans-Testosterone).tw. (604)  
 77 (UNII-3XMK78S470 or Undestor or Virilon or Virormone or Viosterone or Vogelxo).tw. (61)  
 78 or/61-77 (33099)  
 79 randomized controlled trial/ or controlled clinical trial/ (936519)  
 80 exp "clinical trial (topic)"/ (104828)  
 81 (randomi#ed or randomly or RCT\$1 or placebo\*).tw. (1423548)  
 82 ((singl\* or doubl\* or trebl\* or tripl\*) adj (mask\* or blind\* or dumm\*)).tw. (296647)  
 83 trial.ti. (292735)  
 84 or/79-83 (1962147)  
 85 78 and 84 (4042)  
 86 exp animal experimentation/ or exp models animal/ or exp animal experiment/ or nonhuman/ or exp vertebrate/ (37422531)  
 87 exp humans/ or exp human experimentation/ or exp human experiment/ (28425359)  
 88 86 not 87 (8998814)  
 89 85 not 88 (3544)  
 90 (letter or editorial).pt. (2492646)  
 91 89 not 90 (3515)

Supplemental Online Content: Elliott et al. Testosterone therapy in hypogonadal men:  
a systematic review and network meta-analysis.

For peer review only - <http://bmjopen.bmj.com/site/about/guidelines.xhtml>



1  
 2  
 3 92 (control\* adj2 trial\*).tw. (323672)  
 4 93 (nonrandom\* or non-random\* or quasi-random\* or quasi-experiment\*).tw. (73609)  
 5 94 (nRCT or nRCTs or non-RCT\$1).tw. (647)  
 6 95 (control\* adj3 ("before and after" or "before after")).tw. (6046)  
 7 96 time series analysis/ (13996)  
 8 97 time series.tw. (33994)  
 9 98 pretest posttest control group design/ (202)  
 10 99 (pre- adj3 post-).tw. (110642)  
 11 100 (pretest adj3 posttest).tw. (6260)  
 12 101 controlled study/ (4336835)  
 13 102 (control\* adj2 stud\$3).tw. (346641)  
 14 103 control group/ (74764)  
 15 104 (control\* adj2 group\$1).tw. (752277)  
 16 105 or/92-104 (5430128)  
 17 106 78 and 105 (7057)  
 18 107 106 not 88 (3849)  
 19 108 107 not 90 (3833)  
 20 109 cohort analysis/ (334727)  
 21 110 cohort\$1.tw. (675350)  
 22 111 retrospective study/ (837256)  
 23 112 longitudinal study/ (153245)  
 24 113 prospective study/ (618128)  
 25 114 (longitudinal or prospective or retrospective).tw. (1721897)  
 26 115 follow up/ (824941)  
 27 116 ((followup or follow-up) adj (study or studies)).tw. (89267)  
 28 117 observational study/ (58475)  
 29 118 (observation\$2 adj (study or studies)).tw. (111012)  
 30 119 population research/ (68859)  
 31 120 ((population or population-based) adj (study or studies or analys#s)).tw. (26131)  
 32 121 ((multidimensional or multi-dimensional) adj (study or studies)).tw. (187)  
 33 122 exp comparative study/ (2694962)  
 34 123 ((comparative or comparison) adj (study or studies)).tw. (185742)  
 35 124 or/109-123 (5973302)  
 36 125 78 and 124 (4650)  
 37 126 125 not 88 (3667)  
 38 127 126 not 90 (3625)  
 39 128 91 or 108 or 127 (7409)  
 40 129 128 use emczd (5052) [ALL EMBASE RECORDS]  
 41 130 91 use emczd (2221) [EMBASE RCTS]  
 42 131 108 use emczd (3091) [EMBASE NON-RCTS]  
 43 132 127 use emczd (2341) [EMBASE OBSERV]  
 44 133 58 or 130 (3941) [MEDLINE/EMBASE RCTS]  
 45 134 remove duplicates from 133 (2771) [UNIQUE RCTS]  
 46 135 134 use prmz (1666) [MEDLINE UNIQUE RCTS]  
 47 136 134 use emczd (1105) [EMBASE UNIQUE RCTS]  
 48 137 59 or 131 (3936) [MEDLINE/EMBASE NON-RCTS]  
 49 138 137 not 133 (1817) [OVERLAP REMOVED]  
 50 139 remove duplicates from 138 (1633) [UNIQUE NON-RCTS]  
 51 140 139 use prmz (264) [MEDLINE UNIQUE NON-RCTS]  
 52 141 139 use emczd (1369) [EMBASE UNIQUE NON-RCTS]  
 53 142 60 or 132 (4178) [MEDLINE/EMBASE OBSERV]  
 54 143 142 not (133 or 137) (2513) [OVERLAP REMOVED]  
 55 144 remove duplicates from 143 (2170) [UNIQUE OBSERV]  
 56 145 144 use prmz (1216) [MEDLINE UNIQUE OBSERV STUDIES]  
 57 146 144 use emczd (954) [EMBASE UNIQUE OBSERV STUDIES]  
 58 147 134 or 139 or 144 (6574) [UNIQUE RECORDS – ALL STUDY TYPES]

Supplemental Online Content: Elliott et al. Testosterone therapy in hypogonadal men:  
 a systematic review and network meta-analysis.

For peer review only - <http://bmjopen.bmj.com/site/about/guidelines.xhtml>

**eAppendix 2: Scales represented in the analysis of data for each outcome**

|                          |                                                                                          |
|--------------------------|------------------------------------------------------------------------------------------|
| <b>Quality of life</b>   | Aging Males' Symptoms                                                                    |
|                          | Minnesota Living with Heart Failure Questionnaire                                        |
|                          | Quality of Life Specific to Male Erection Difficulties                                   |
|                          | International Prostate Symptoms Score Quality of Life                                    |
|                          | Quality of Life Enjoyment and Satisfaction Questionnaire                                 |
|                          | Questions on Life Satisfaction, health subscale                                          |
|                          | Health Related Quality of Life, sexual function domain SF-36 (total score)               |
| <b>Depression</b>        | Hospital Anxiety and Depression Scale                                                    |
|                          | Beck's Depression Inventory                                                              |
|                          | General Well-Being Index, depressed mood dimension                                       |
|                          | Geriatric Depression Scale                                                               |
|                          | Hamilton Depression Scale                                                                |
| <b>Libido</b>            | International Index of Erectile Function (sexual desire domain)                          |
|                          | Men's Sexual Health Questionnaire (sexual desire domain)                                 |
|                          | Partial Androgen Deficiency in Aging Men (PADAM) Questionnaire                           |
|                          | Psychosexual Daily Questionnaire                                                         |
| <b>Erectile function</b> | International Index of Erectile Function (IIEF-5 or erectile function domain of IIEF-15) |

### eAppendix 3: Included studies\*

\*The list of excluded studies is available from the authors on request.

Note: studies were not evaluated for inclusion on the basis reported outcomes.

1. Agarwal PK, Oefelein MG. Testosterone replacement therapy after primary treatment for prostate cancer. *J Urol*. 2005; 173: 533–6.
2. Agledahl I, Brodin E, Svartberg J, et al. Impact of long-term testosterone treatment on plasma levels of free TFPI and TF-induced thrombin generation ex vivo in elderly men with low testosterone levels. *Thrombo Haemostasis*. 2009; 102: 945.
3. Agledahl I, Hansen JB, Svartberg J. Impact of testosterone treatment on postprandial triglyceride metabolism in elderly men with subnormal testosterone levels. *Scand J Clin Lab Invest* 2008; 68: 641.
4. Alamir MA, Ellenberg SS, Swerdloff RS, et al. The Cardiovascular Trial of the Testosterone Trials: Rationale, design, and baseline data of a clinical trial using computed tomographic imaging to assess the progression of coronary atherosclerosis. *Coronary Artery Disease*. 2016;27:95.
5. Amory JK, Watts NB, Easley KA, et al. Exogenous testosterone or testosterone with finasteride increases bone mineral density in older men with low serum testosterone. *J Clin Endocrinol Metab* 2004; 89: 503–10.
6. Andrade ES, Jr., Clapauch R, Buksman S. Short term testosterone replacement therapy improves libido and body composition. *Arq Bras Endocrinol Metabol* 2009;53:996–1004.
7. Arafa M, Zohdy W, Aboulsoud S, et al. Prevalence of late-onset hypogonadism in men with type 2 diabetes mellitus. *Andrologia* 2012; 44: 756.
8. Arver S, Sinha-Hikim I, Beall G, Guerrero M, Shen R, Bhasin S. Serum dihydrotestosterone and testosterone concentrations in human immunodeficiency virus-infected men with and without weight loss. *J Androl* 1999; 20: 611–8.
9. Atkinson RA, Srinivas-Shankar U, Roberts SA, et al. Effects of testosterone on skeletal muscle architecture in intermediate-frail and frail elderly men. *J Gerontol A Biol Sci Med Sci* 2010; 65: 1215.
10. Aversa A, Bruzziches R, Francomano D, et al. Effects of testosterone undecanoate on cardiovascular risk factors and atherosclerosis in middle-aged men with late-onset hypogonadism and metabolic syndrome: results from a 24-month, randomized, double-blind, placebo-controlled study. *J Sex Med* 2010; 7: 3495.
11. Aversa A, Bruzziches R, Francomano D, Spera G, Lenzi A. Efficacy and safety of two different testosterone undecanoate formulations in hypogonadal men with metabolic syndrome. *J Endocrinol Invest* 2010; 33: 776–3.
12. Aversa A, Bruzziches R, Francomano D, et al. Effects of long-acting testosterone undecanoate on bone mineral density in middle-aged men with late-onset hypogonadism and metabolic syndrome: Results from a 36 months controlled study. *Aging Male* 2012; 15: 96.
13. Aydogdu A, Bolu E, Sonmez A, et al. Effects of three different medications on metabolic parameters and testicular volume in patients with hypogonadotropic hypogonadism: 3-year experience. *Clin Endocrinol* 2013; 79: 243–51.
14. Bachman E, Travison TG, Basaria S, et al. Testosterone induces erythrocytosis via increased erythropoietin and suppressed hepcidin: evidence for a new erythropoietin/hemoglobin set point. *J Gerontol A Biol Sci Med Sci* 2014; 69: 725–735.
15. Basaria S, Coviello AD, Travison TG, et al. Adverse events associated with testosterone administration. *N Engl J Med* 2010; 363: 109–22.
16. Basaria S, Davda MN, Travison TG, Ulloor J, Singh R, Bhasin S. Risk factors associated with cardiovascular events during testosterone administration in older men with mobility limitation. *J Gerontol A Biol Sci Med Sci* 2013; 68: 153–160.
17. Basaria S, Harman SM, Travison TG, et al. Effects of Testosterone Administration for 3 Years on Subclinical Atherosclerosis Progression in Older Men With Low or Low-Normal Testosterone Levels: A Randomized Clinical Trial. *JAMA : the journal of the American Medical Association*. 2015;314:570.
18. Basaria S, Travison TG, Alford D, et al. Effects of testosterone replacement in men with opioid-induced androgen deficiency: a randomized controlled trial. *Pain*. 2015;156:280.

Supplemental Online Content: Elliott et al. Testosterone therapy in hypogonadal men:  
a systematic review and network meta-analysis.

For peer review only - <http://bmjopen.bmj.com/site/about/guidelines.xhtml>

19. Basurto L, Zarate A, Gomez R, Vargas C, Saucedo R, Galvan R. Effect of testosterone therapy on lumbar spine and hip mineral density in elderly men. *Aging Male* 2008; 11: 140–5.
20. Beggs LA, Yarrow JF, Conover CF, et al. Testosterone alters iron metabolism and stimulates red blood cell production independently of dihydrotestosterone. *Am J Physiol Endocrinol Metab* 2014; 307: E456–E461.
21. Behre HM, Tammela TL, Arver S., et al. A randomized, double-blind, placebo-controlled trial of testosterone gel on body composition and health-related quality-of-life in men with hypogonadal to low-normal levels of serum testosterone and symptoms of androgen deficiency over 6 months with 12 months open-label follow-up. *Aging Male* 2012; 15: 198.
22. Bhasin S, Storer TW, Asbel-Sethi N, et al. Effects of testosterone replacement with a nongenital, transdermal system, Androderm, in human immunodeficiency virus-infected men with low testosterone levels. *J Clin Endocrinol Metab* 1998; 83: 3155–62.
23. Bhasin S, Storer TW, Javanbakht M, et al. Testosterone replacement and resistance exercise in HIV-infected men with weight loss and low testosterone levels. *JAMA* 2000; 283: 763–70.
24. Black AM, Day AG, Morales A. The reliability of clinical and biochemical assessment in symptomatic late-onset hypogonadism: Can a case be made for a 3-month therapeutic trial? *BJU International* 2004; 94: 1066–70.
25. Blick G. Optimal diagnostic measures and thresholds for hypogonadism in men with HIV/AIDS: comparison between 2 transdermal testosterone replacement therapy gels. *Postgrad.Med* 2013; 125: 30–9.
26. Borst SE, Yarrow JF, Conover CF, et al. Musculoskeletal and prostate effects of combined testosterone and finasteride administration in older hypogonadal men: a randomized, controlled trial. *Am J Physiol Endocrinol Metab* 2014; 306: E433–E442.
27. Borst SE, Yarrow JF, Fernandez C, et al. Cognitive effects of testosterone and finasteride administration in older Hypogonadal men. *Clin Interv Aging*. 2014; 9: 1327–33.
28. Boyanov MA, Boneva Z, Christov VG. Testosterone supplementation in men with type 2 diabetes, visceral obesity and partial androgen deficiency. *Aging Male* 2003; 6: 1–7.
29. Brock G, Heiselman D, Maggi M, Kim SW, Rodr JM. Effect of Testosterone Solution 2% on Testosterone Concentration, Sex Drive and Energy in Hypogonadal Men: Results of a Placebo Controlled Study. *J Urol*. 2016;195:699.
30. Brockenbrough AT, Dittrich MO, Page ST, Smith T, Stivelman JC, Bremner WJ. Transdermal androgen therapy to augment EPO in the treatment of anemia of chronic renal disease. *Am J Kidney Dis* 2006; 47: 251–62.
31. Budoff MJ, Ellenberg SS, Lewis CE, et al. Testosterone Treatment and Coronary Artery Plaque Volume in Older Men With Low Testosterone. *JAMA : the journal of the American Medical Association*. 2017;317:708.
32. Buisson J. Effects of testosterone supplementation on sexual function in elderly men: Results of a six month randomised, placebo controlled study. *Cahiers de l'Annee Gerontologique* 2010; 2: 144–6.
33. Burnett AL, Kan-Dobrosky N, Miller MG. Testosterone replacement with 1% testosterone gel and priapism: no definite risk relationship. *J Sex Med* 2013; 10: 1151–61.
34. Caminiti G, Volterrani M, Iellamo F, et al. Effect of long-acting testosterone treatment on functional exercise capacity, skeletal muscle performance, insulin resistance, and baroreflex sensitivity in elderly patients with chronic heart failure a double-blind, placebo-controlled, randomized study. *J Am College Cardiol* 2009; 54: 919.
35. Cavallini G, Biagiotti G, Giudice C. Association between Peyronie disease and low serum testosterone levels: detection and therapeutic considerations. *J Androl* 2012; 33: 381.
36. Cavallini G, Caracciolo S, Vitali G, Modenini F, Biagiotti G. Carnitine versus androgen administration in the treatment of sexual dysfunction, depressed mood, and fatigue associated with male aging. *Urology* 2004; 63: 641–6.
37. Cheetham TC, An JJ, Jacobsen SJ, et al. Association of testosterone replacement with cardiovascular outcomes among men with androgen deficiency. *JAMA Internal Medicine*. 2017;177:491.
38. Cherrier MM, Anderson K, Shofer J, Millard S, Matsumoto AM. Testosterone treatment of men with mild cognitive impairment and low testosterone levels. *Am J Alzheimers Dis Other Demen*. 2015;30:421.
39. Chiang HS, Cho SL, Lin YC, Hwang TI. Testosterone gel monotherapy improves sexual function of hypogonadal men mainly through restoring erection: evaluation by IIEF score. *Urology* 2009; 73(4): 762-6.
40. Chiang HS, Hwang TI, Hsui YS, et al. Transdermal testosterone gel increases serum testosterone levels in hypogonadal men in Taiwan with improvements in sexual function. *Int J Impot Res* 2007; 19(4): 411–7.

Supplemental Online Content: Elliott et al. Testosterone therapy in hypogonadal men:  
a systematic review and network meta-analysis.

For peer review only - <http://bmjopen.bmj.com/site/about/guidelines.xhtml>

- 1
  - 2
  - 3
  - 4
  - 5
  - 6
  - 7
  - 8
  - 9
  - 10
  - 11
  - 12
  - 13
  - 14
  - 15
  - 16
  - 17
  - 18
  - 19
  - 20
  - 21
  - 22
  - 23
  - 24
  - 25
  - 26
  - 27
  - 28
  - 29
  - 30
  - 31
  - 32
  - 33
  - 34
  - 35
  - 36
  - 37
  - 38
  - 39
  - 40
  - 41
  - 42
  - 43
  - 44
  - 45
  - 46
  - 47
  - 48
  - 49
  - 50
  - 51
  - 52
  - 53
  - 54
  - 55
  - 56
  - 57
  - 58
  - 59
  - 60
41. Chillar JJ. Testosterone undecanoate improves lipid profile in patients with type 1 diabetes and hypogonadotropic hypogonadism. *Endocrine journal*. 2017;63:849.
42. Clague JE, Wu FC, Horan MA. Difficulties in measuring the effect of testosterone replacement therapy on muscle function in older men. *Int J Androl* 1999; 22(4): 261-265.
43. Cunningham GR, Stephens-Shields AJ, Rosen RC, et al. Association of sex hormones with sexual function, vitality, and physical function of symptomatic older men with low testosterone levels at baseline in the testosterone trials. *Journal of Clinical Endocrinology and Metabolism*. 2015;100:1146.
44. Cunningham GR, Stephens-Shields AJ, Rosen RC, et al. Testosterone treatment and sexual function in older men with low testosterone levels. *Journal of Clinical Endocrinology and Metabolism*. 2016;101:3096.
45. Dean JD, Carnegie C, Rodzvilla J, Smith T. Long-term effects of Testim 1% testosterone gel in hypogonadal men. *Rev Urol* 2005; 7(2): 87-94.
46. Debruyne FMJ, Behre HM, Roehrborn CG, et al. Testosterone treatment is not associated with increased risk of prostate cancer or worsening of lower urinary tract symptoms: prostate health outcomes in the Registry of Hypogonadism in Men. *BJU International*. 2017;119:216.
47. Dhindsa S, Ghanim H, Batra M, et al. Insulin Resistance and Inflammation in Hypogonadotropic Hypogonadism and Their Reduction After Testosterone Replacement in Men With Type 2 Diabetes. *Diabetes Care*. 2016;39:82.
48. Dias JP, Melvin D, Shardell M, et al. Effects of transdermal testosterone gel or an aromatase inhibitor on prostate volume in older men. *Journal of Clinical Endocrinology and Metabolism*. 2016;101:1865.
49. Dias JP, Melvin D, Simonsick EM, et al. Effects of aromatase inhibition vs. testosterone in older men with low testosterone: randomized-controlled trial. *Andrology*. 2016;4:33.
50. Dias JP, Shardell MD, Carlson OD, et al. Testosterone vs. aromatase inhibitor in older men with low testosterone: effects on cardiometabolic parameters. *Andrology*. 2017;5:31.
51. Dias JP, Veldhuis JD, Carlson O, et al. Effects of transdermal testosterone gel or an aromatase inhibitor on serum concentration and pulsatility of growth hormone in older men with age-related low testosterone. *Metabolism*. 2017;69:143-147, 2017 Apr.
52. Dobs AS, Meikle AW, Arver S, Sanders SW, Caramelli KE, Mazer NA. Pharmacokinetics, efficacy, and safety of a permeation-enhanced testosterone transdermal system in comparison with bi-weekly injections of testosterone enanthate for the treatment of hypogonadal men. *J Clin Endocrinol Metab* 1999; 84(10): 3469-78.
53. Drinka PJ, Jochen AL, Cuisinier M, Bloom R, Rudman I, Rudman D. Polycythemia as a complication of testosterone replacement therapy in nursing home men with low testosterone levels. *J Am Geriatr Soc* 1995; 43(8): 899-901.
54. Eisenberg ML, Li S, Herder D, Lamb DJ, Lipshultz LI. Testosterone therapy and mortality risk. *Int J Impot Res* 2014; 27:46-8.
55. Emmelot-Vonk MH, Verhaar HJ, Nakhai Pour HR, et al. Effect of testosterone supplementation on functional mobility, cognition, and other parameters in older men: a randomized controlled trial. *JAMA* 2008; 299(1): 39-52.
56. Emmelot-Vonk MH, Verhaar HJ, Nakhai-Pour HR, Grobbee DE, van der Schouw YT. Effect of testosterone supplementation on sexual functioning in aging men: a 6-month randomized controlled trial. *Int J Impot Res* 2009; 21: 129-38.
57. Fennell C, Sartorius G, Ly LP, et al. Randomized cross-over clinical trial of injectable vs. implantable depot testosterone for maintenance of testosterone replacement therapy in androgen deficient men. *Clin Endocrinol* 2010; 73: 102.
58. Ferrando AA, Sheffield-Moore M, Paddon-Jones D, Wolfe RR, Urban RJ. Differential anabolic effects of testosterone and amino acid feeding in older men. *J Clin Endocrinol Metab* 2003; 88:358-62.
59. Ferrando AA, Sheffield-Moore M, Yeckel CW, et al. Testosterone administration to older men improves muscle function: molecular and physiological mechanisms. *Am J Physiol Endocrinol Metab* 2002; 282: E601-E607.
60. Fitts RH, Peters JR, Dillon EL, Durham WJ, Sheffield-Moore M, Urban RJ. Weekly versus monthly testosterone administration on fast and slow skeletal muscle fibers in older adult males. *Journal of Clinical Endocrinology and Metabolism*. 2015;100:E223.
61. Francomano D, Bruzziches R, Barbaro G, et al. Effects of testosterone undecanoate replacement and withdrawal on cardio-metabolic, hormonal and body composition outcomes in severely obese hypogonadal men: A pilot study. *J Endocrinol Invest* 2014; 37: 401-11.

Supplemental Online Content: Elliott et al. Testosterone therapy in hypogonadal men:  
a systematic review and network meta-analysis.

For peer review only - <http://bmjopen.bmj.com/site/about/guidelines.xhtml>

- 1  
2  
3  
4  
5  
6  
7  
8  
9  
10  
11  
12  
13  
14  
15  
16  
17  
18  
19  
20  
21  
22  
23  
24  
25  
26  
27  
28  
29  
30  
31  
32  
33  
34  
35  
36  
37  
38  
39  
40  
41  
42  
43  
44  
45  
46  
47  
48  
49  
50  
51  
52  
53  
54  
55  
56  
57  
58  
59  
60
62. Francomano D, Ilacqua A, Bruzziches R, et al. Effects of 5-year treatment with testosterone undecanoate on lower urinary tract symptoms in obese men with hypogonadism and metabolic syndrome. *Urology* 2014; 83: 167.
  63. Francomano D, Lenzi A, Aversa A. Effects of five-year treatment with testosterone undecanoate on metabolic and hormonal parameters in ageing men with metabolic syndrome. *Int J Endocrinol* 2014; 2014: 527470.
  64. Fui MNT, Hoermann R, Prendergast LA, Zajac JD, Grossmann M. Symptomatic response to testosterone treatment in dieting obese men with low testosterone levels in a randomized, placebo-controlled clinical trial. *Int J Obes (Lond)*. 2017;41:420.
  65. Gagliano-Juca T, Icli TB, Pencina KM, et al. Effects of Testosterone Replacement on Electrocardiographic Parameters in Men: Findings From Two Randomized Trials. *Journal of Clinical Endocrinology and Metabolism*. 2017;102:1478.
  66. Gianatti EJ, Dupuis P, Hoermann R, et al. Effect of testosterone treatment on glucose metabolism in men with type 2 diabetes: A randomized controlled trial. *Diabetes Care* 2014; 37: 2098–107.
  67. Gianatti EJ, Dupuis P, Hoermann R, Zajac JD, Grossmann M. Effect of testosterone treatment on constitutional and sexual symptoms in men with type 2 diabetes in a randomized, placebo-controlled clinical trial. *J Clin Endocrinol Metab* 2014; 99: 3821–8.
  68. Gianatti EJ, Hoermann R, Lam Q, Dupuis P, Zajac JD, Grossmann M. Effect of testosterone treatment on cardiac biomarkers in a randomized controlled trial of men with type 2 diabetes. *Clinical Endocrinology*. 2016;84:55.
  69. Giltay EJ, Tishova YA, Mskhalaya GJ, et al. Effects of testosterone supplementation on depressive symptoms and sexual dysfunction in hypogonadal men with the metabolic syndrome. *J Sex Med* 2010; 7: 2572.
  70. Gioia A, Ceccoli L, Ronconi V, et al. Vitamin D levels and bone mineral density: Are LH levels involved in the pathogenesis of bone impairment in hypogonadal men? *J Endocrinol Invest* 2014; 37: 1225–31.
  71. Gooren LJ, Saad F, Haide A, et al. Decline of plasma 5alpha-dihydrotestosterone (DHT) levels upon testosterone administration to elderly men with subnormal plasma testosterone and high DHT levels. *Andrologia* 2008; 40: 298.
  72. Gopal RA, Bothra N, Acharya SV, et al. Treatment of hypogonadism with testosterone in patients with type 2 diabetes mellitus. *Endocr Pract* 2010; 16: 570–6.
  73. Grinspoon S, Corcoran C, Askari H, et al. Effects of androgen administration in men with the AIDS wasting syndrome. A randomized, double-blind, placebo-controlled trial. *Ann Intern Med* 1998; 129: 18–26.
  74. Grinspoon S, Corcoran C, Stanley T, Baaj A, Basgoz N, Klibanski A. Effects of hypogonadism and testosterone administration on depression indices in HIV-infected men. *J Clin Endocrinol Metab* 2000; 85: 60–5.
  75. Guay AT, Perez JB, Fitaihi WA, Vereb M. Testosterone treatment in hypogonadal men: prostate-specific antigen level and risk of prostate cancer. *Endocr Pract* 2000; 6: 132–8.
  76. Hackett G, Cole N, Bhartia M et al; BLAST Study Group. Testosterone replacement therapy improves metabolic parameters in hypogonadal men with type 2 diabetes but not in men with coexisting depression: the BLAST study. *J Sex Med* 2014; 11: 840.
  77. Hackett G, Cole N, Bhartia M, et al. Testosterone replacement therapy with long-acting testosterone undecanoate improves sexual function and quality-of-life parameters vs. placebo in a population of men with type 2 diabetes. *J Sex Med* 2013; 10: 1612.
  78. Hackett G, Cole N, Bhartia M, et al;BLAST Study Group. The response to testosterone undecanoate in men with type 2 diabetes is dependent on achieving threshold serum levels (the BLAST study). *Int J Clin Pract* 2014; 68: 203.
  79. Hajjar RR, Kaiser FE, Morley JE. Outcomes of long-term testosterone replacement in older hypogonadal males: a retrospective analysis. *J Clin Endocrinol Metab* 1997; 82: 3793–6.
  80. Handelsman DJ, Conway AJ, Boylan LM. Table . *J Clin Endocrinol Metab* 1990; 71: 216.
  81. Heufelder AE, Saad F, Bunck MC, et al. Fifty-two-week treatment with diet and exercise plus transdermal testosterone reverses the metabolic syndrome and improves glycemic control in men with newly diagnosed type 2 diabetes and subnormal plasma testosterone. *J Androl* 2009; 30: 726.
  82. Hildreth KL, Barry DW, Moreau KL, et al. Effects of testosterone and progressive resistance exercise in healthy, highly functioning older men with low-normal testosterone levels. *J Clin Endocrinol Metab* 2013; 98: 1891–1900.
  83. Ho CC, Tong SF, Low WY, et al. A randomized, double-blind, placebo-controlled trial on the effect of long-acting testosterone treatment as assessed by the Aging Male Symptoms scale. *BJU Int* 2012; 110: 260.
  84. Hohl A, Marques MO, MH Coral, et al. Evaluation of late-onset hypogonadism (andropause) treatment using three different formulations of injectable testosterone. *Arq Bras Endocrinol Metabol* 2009; 53: 989.

Supplemental Online Content: Elliott et al. Testosterone therapy in hypogonadal men:  
a systematic review and network meta-analysis.

For peer review only - <http://bmjopen.bmj.com/site/about/guidelines.xhtml>

- 1  
2  
3  
4  
5  
6  
7  
8  
9  
10  
11  
12  
13  
14  
15  
16  
17  
18  
19  
20  
21  
22  
23  
24  
25  
26  
27  
28  
29  
30  
31  
32  
33  
34  
35  
36  
37  
38  
39  
40  
41  
42  
43  
44  
45  
46  
47  
48  
49  
50  
51  
52  
53  
54  
55  
56  
57  
58  
59  
60
85. Host C, Bojesen A, Frystyk J, Flyvbjerg A, Christiansen JS, Gravholt CH. Effect of sex hormone treatment on circulating adiponectin and subforms in Turner and Klinefelter syndrome. *Eur J Clin Invest* 2010; 40: 211–9.
  86. Huang G, Bhasin S, Tang ER, et al. Effect of testosterone administration on liver fat in older men with mobility limitation: results from a randomized controlled trial. *J Gerontol A Biol Sci Med Sci.* 2013; 68: 954–9.
  87. Huang G, Travison T, Maggio M, Edwards RR, Basaria S. Effects of testosterone replacement on metabolic and inflammatory markers in men with opioid-induced androgen deficiency. *Clinical Endocrinology.* 2016;85:232.
  88. Jin B, Conway AJ, Handelsman DJ. Effects of androgen deficiency and replacement on prostate zonal volumes. *Clinical Endocrinology* 2001; 54: 437–45.
  89. Jockenhovel F, Blum WF, Vogel E, et al. Testosterone substitution normalizes elevated serum leptin levels in hypogonadal men. *J Clin Endo Metabo* 1997; 82: 2510.
  90. Jockenhovel F, Bullmann C, Schubert M, et al. Influence of various modes of androgen substitution on serum lipids and lipoproteins in hypogonadal men. *Metabolism* 1999; 48: 590.
  91. Jockenhovel F, Minnemann T, Schubert M, et al. Comparison of long-acting testosterone undecanoate formulation versus testosterone enanthate on sexual function and mood in hypogonadal men. *Eur J Endocrinol* 2009; 160: 815.
  92. Jockenhovel F, Minnemann T, Schubert M, et al. Timetable of effects of testosterone administration to hypogonadal men on variables of sex and mood. *Aging Male* 2009; 12: 113.
  93. Jockenhovel F, Vogel E, Reinhardt W, et al. Effects of various modes of androgen substitution therapy on erythropoiesis. *Euro J Med Res* 1997; 2: 293.
  94. Jones TH, Arver S, Behre HM, et al. Channer, TIMES2 Investigators. Testosterone replacement in hypogonadal men with type 2 diabetes and/or metabolic syndrome (the TIMES2 study). *Diabetes Care* 2011; 34: 828.
  95. Jung HJ, Shin HS. Effect of Testosterone Replacement Therapy on Cognitive Performance and Depression in Men with Testosterone Deficiency Syndrome. 2016;34:194.
  96. Kacker R, Connors W, Zade J, et al. Bone mineral density and response to treatment in men younger than 50 years with testosterone deficiency and sexual dysfunction or infertility. *J Urology* 2014; 191: 1072–6.
  97. Kalinchenko S, Vishnevskiy EL, Koval AN, Mskhalaya GJ, Saad F. Beneficial effects of testosterone administration on symptoms of the lower urinary tract in men with late-onset hypogonadism: A pilot study. *Aging Male.* 2008; 11: 57–61.
  98. Kalinchenko SY, Tishova Y.A, Mskhalaya GJ, et al. Effects of testosterone supplementation on markers of the metabolic syndrome and inflammation in hypogonadal men with the metabolic syndrome: the double-blinded placebo-controlled Moscow study. *Clin Endocrinol* 2010; 73: 602.
  99. Kang SM, Jang Y, Kim JY, et al. Effect of oral administration of testosterone on brachial arterial vasoreactivity in men with coronary artery disease. *Am J Cardiol* 2002;89: 862–4.
  100. Kaplan AL, Trinh QD, Sun M, et al. Testosterone replacement therapy following the diagnosis of prostate cancer: Outcomes and utilization trends. *J Sex Med* 2014; 11: 1063–70.
  101. Kapoor D, Clarke S, Stanworth R., et al. The effect of testosterone replacement therapy on adipocytokines and C-reactive protein in hypogonadal men with type 2 diabetes. *Eur J Endocrinol* 2007; 156: 595–602.
  102. Kapoor D, Goodwin E, Channer KS, et al. Testosterone replacement therapy improves insulin resistance, glycaemic control, visceral adiposity and hypercholesterolaemia in hypogonadal men with type 2 diabetes. *Eur J Endocrinol* 2006; 154: 899.
  103. Kaufman JM, Miller MG, Garwin JL, et al. Efficacy and safety study of 1.62% testosterone gel for the treatment of hypogonadal men. *J Sex Med* 2011; 8: 2079.
  104. Kenny AM, Kleppinger A, Annis K, et al. Effects of transdermal testosterone on bone and muscle in older men with low bioavailable testosterone levels, low bone mass, and physical frailty. *J Am Geriatr Soc.* 2010; 58: 1134–43.
  105. Konaka H, Sugimoto K, Orikasa H, et al. Effects of long-term androgen replacement therapy on the physical and mental statuses of aging males with late-onset hypogonadism: a multicenter randomized controlled trial in Japan (EARTH Study). *Asian Journal of Andrology.* 2016;18:25.
  106. Kubler A, Schulz G, Cordes U, et al. The influence of testosterone substitution on bone mineral density in patients with Klinefelter's syndrome. *Exp Clin Endocrinol* 1992; 100: 129–32.
  107. Kuhnert B, Byrne M, Simoni M, et al. Testosterone substitution with a new transdermal, hydroalcoholic gel applied to scrotal or non-scrotal skin: a multicentre trial. *Eur J Endocrinol* 2005; 153: 317.

Supplemental Online Content: Elliott et al. Testosterone therapy in hypogonadal men:  
a systematic review and network meta-analysis.

For peer review only - <http://bmjopen.bmj.com/site/about/guidelines.xhtml>

- 1  
2  
3  
4  
5  
6  
7  
8  
9  
10  
11  
12  
13  
14  
15  
16  
17  
18  
19  
20  
21  
22  
23  
24  
25  
26  
27  
28  
29  
30  
31  
32  
33  
34  
35  
36  
37  
38  
39  
40  
41  
42  
43  
44  
45  
46  
47  
48  
49  
50  
51  
52  
53  
54  
55  
56  
57  
58  
59  
60
108. Layton JB, Meier CR, Sharpless JL, Sturmer T, Jick SS, Brookhart MA. Comparative Safety of Testosterone Dosage Forms. *JAMA Intern Med.* 2015;175:1187.
  109. Lu J, Fan J, Zhu J, et al. The prospective and randomized control study of Viagra combined with Andriol in the treatment of ED in the aging male. *Chinese J Androl* 2003; 17: 194.
  110. Maggi M, Heiselman D, Knorr J, Iyengar S, Paduch DA, Donatucci CF. Impact of Testosterone Solution 2% on Ejaculatory Dysfunction in Hypogonadal Men. *Journal of Sexual Medicine.* 2017;13:1220.
  111. Magnussen LV, Glintborg D, Hermann P, Hougaard DM, Hojlund K, Andersen M. Effect of testosterone on insulin sensitivity, oxidative metabolism and body composition in aging men with type 2 diabetes on metformin monotherapy. *Diabetes Obes Metab.* 2016;18:980.
  112. Majzoub A, Shoskes DA. A case series of the safety and efficacy of testosterone replacement therapy in renal failure and kidney transplant patients. *Translational Andrology and Urology.* 2016;5:814.
  113. Mark Ng Tang F, Luke AP, Philippe D, et al. Effects of testosterone treatment on body fat and lean mass in obese men on a hypocaloric diet: a randomised controlled trial. *BMC medicine.* 2016:153.
  114. Marks LS, Mazer NA, Mostaghel E, et al. Effect of testosterone replacement therapy on prostate tissue in men with late-onset hypogonadism: a randomized controlled trial. *JAMA* 2006; 296: 2351–61.
  115. Mathur A, Malkin C, Saeed B, et al. Long-term benefits of testosterone replacement therapy on angina threshold and atheroma in men. *Eur J Endocrinol* 2009; 161: 443.
  116. McCullough AR, Khera M, Goldstein I, et al. A multi-institutional observational study of testosterone levels after testosterone pellet (Testopel) insertion. *J Sex Med* 2012; 9: 594.
  117. McNicholas TA, Dean JD, Mulder H, Carnegie C, Jones NA. A novel testosterone gel formulation normalizes androgen levels in hypogonadal men, with improvements in body composition and sexual function. *BJU International.* 2003; 91: 69–74.
  118. Merza Z, Blumsohn A, Mah PM, et al. Double-blind placebo-controlled study of testosterone patch therapy on bone turnover in men with borderline hypogonadism. *Int J Androl* 2006; 29: 381.
  119. Minnemann T, Schubert M, Freude S, et al. Comparison of a new long-acting testosterone undecanoate formulation vs testosterone enanthate for intramuscular androgen therapy in male hypogonadism. *J Endocrinol Invest* 2008; 31: 718.
  120. Montano M, Flanagan JN, Jiang L, et al. Transcriptional profiling of testosterone-regulated genes in the skeletal muscle of human immunodeficiency virus-infected men experiencing weight loss. *J Clin Endocrinol Metab.* 2007; 92: 2793–802.
  121. Morales A, Black A, Emerson L, Barkin J, Kuzmarov I, Day A. Androgens and sexual function: a placebo-controlled, randomized, double-blind study of testosterone vs. dehydroepiandrosterone in men with sexual dysfunction and androgen deficiency. *Aging Male* 2009; 12: 104–12.
  122. Morgentaler A, Benesh JA, Denes BS, Kan-Dobrosky N, Harb D, Miller MG. Factors influencing prostate-specific antigen response among men treated with testosterone therapy for 6 months. *J Sex Med* 2014; 11: 2818–25.
  123. Morgunov LI, Denisova IA, Rozhkova TI, et al. Androgenic deficit and its treatment in stroke male patients with diabetes mellitus type II. *Zh Nevrol Psikhiatr Im S S Korsakova* 2011; 111: 21.
  124. Muraleedharan V, Marsh H, Kapoor D, Channer KS, Jones TH. Testosterone deficiency is associated with increased risk of mortality and testosterone replacement improves survival in men with type 2 diabetes. *Eur J Endocrinol* 2013; 169(6): 725–33.
  125. Nakhai-Pour HR, Grobbee DE, Emmelot-Vonk MH, Bots ML, Verhaar HJ, van der Schouw YT. Oral testosterone supplementation and chronic low-grade inflammation in elderly men: a 26-week randomized, placebo-controlled trial. *Am Heart J* 2007;154(6): 1228.
  126. Nasser M, Haider A, Saad F, et al. Testosterone therapy in men with Crohn's disease improves the clinical course of the disease: Data from long-term observational registry study. *Hormone Molecular Biology and Clinical Investigation.* 2015;22:111.
  127. O'Connell MD, Roberts SA, Srinivas-Shankar U, et al. Do the effects of testosterone on muscle strength, physical function, body composition, and quality of life persist six months after treatment in intermediate-frail and frail elderly men? *J Clin Endocrinol Metab* 2011; 96: 454.
  128. Orengo CA, Fullerton L, Kunik ME. Safety and efficacy of testosterone gel 1% augmentation in depressed men with partial response to antidepressant therapy. *J Geriatr Psychiatry Neurol* 2005; 18: 20–4.

Supplemental Online Content: Elliott et al. Testosterone therapy in hypogonadal men:  
a systematic review and network meta-analysis.

For peer review only - <http://bmjopen.bmj.com/site/about/guidelines.xhtml>



- 1  
2  
3  
4  
5  
6  
7  
8  
9  
10  
11  
12  
13  
14  
15  
16  
17  
18  
19  
20  
21  
22  
23  
24  
25  
26  
27  
28  
29  
30  
31  
32  
33  
34  
35  
36  
37  
38  
39  
40  
41  
42  
43  
44  
45  
46  
47  
48  
49  
50  
51  
52  
53  
54  
55  
56  
57  
58  
59  
60
129. Paduch DA, Polzer PK, Ni X, Basaria S. Testosterone Replacement in Androgen-Deficient Men With Ejaculatory Dysfunction: A Randomized Controlled Trial. *Journal of Clinical Endocrinology and Metabolism*. 2015;100:2956.
130. Page ST, Amory JK, Bowman FD, et al. Exogenous testosterone (T) alone or with finasteride increases physical performance, grip strength, and lean body mass in older men with low serum T. *J Clin Endocrinol Metab* 2005; 90: 1502–10.
131. Park NC, Yan BQ, Chung JM, Lee KM. Oral testosterone undecanoate (Andriol) supplement therapy improves the quality of life for men with testosterone deficiency. *Aging Male* 2003; 6: 86–93.
132. Pastuszak AW, Gomez LP, Scovell JM, Khera M, Lamb DJ, Lipshultz LI. Comparison of the Effects of Testosterone Gels, Injections, and Pellets on Serum Hormones, Erythrocytosis, Lipids, and Prostate-Specific Antigen. *Sexual Medicine*. 2015;3:165.
133. Ramasamy R, Scovell J, Mederos M, Ren R, Jain L, Lipshultz L. Association between Testosterone Supplementation Therapy and Thrombotic Events in Elderly Men. *Urology*. 2015;86:283.
134. Raynaud JP, Legros JJ, Rollet J, et al. Efficacy and safety of a new testosterone-in-adhesive matrix patch applied every 2 days for 1 year to hypogonadal men. *J Steroid Biochem Mol Biol* 2008; 109: 168.
135. Reid IR, Wattie DJ, Evans MC, et al. Testosterone therapy in glucocorticoid-treated men. *Arch Intern Med* 1996; 156: 1173.
136. Resnick SM, Matsumoto AM, Stephens-Shields AJ, et al. Testosterone Treatment and Cognitive Function in Older Men With Low Testosterone and Age-Associated Memory Impairment. *JAMA : the journal of the American Medical Association*. 2017;317:717.
137. Rhoden EL, Morgentaler A. Influence of demographic factors and biochemical characteristics on the prostate-specific antigen (PSA) response to testosterone replacement therapy. *Int J Impot Res* 2006;18: 201–5.
138. Ross RJM, Siyambalapitiya S, Jonsson P, Koltowska-Haggstrom M, Gaillard R, Ho K. Cross-sectional analysis of testosterone therapies in hypopituitary men on stable pituitary hormone replacement. *Clin Endocrinol* 2009; 70: 907–13.
139. Roy CN, Snyder PJ, Stephens-Shields AJ, et al. Association of Testosterone Levels With Anemia in Older Men: A Controlled Clinical Trial. *JAMA Intern Med*. 2017;177:480.
140. Saad F, Gooren LJ, Haider A, et al. A dose-response study of testosterone on sexual dysfunction and features of the metabolic syndrome using testosterone gel and parenteral testosterone undecanoate. *J Androl* 2008; 29: 102.
141. Saeedi M, Kosaryan M, Fekri K, et al. A randomized, double-blind, controlled trial of testosterone gel treatment versus vehicle control on the facial hair of young men with beta-thalassemia major. *J Dermatol Treat* 2007; 18: 271.
142. Santos MRD, Sayegh ALC, Bacurau AVN, et al. Effect of Exercise Training and Testosterone Replacement on Skeletal Muscle Wasting in Patients with Heart Failure with Testosterone Deficiency. *Mayo Clin Proc*. 2016;91:575.
143. Schubert M, Bullmann C, Minnemann T, et al. Osteoporosis in male hypogonadism: responses to androgen substitution differ among men with primary and secondary hypogonadism. *Hormone Res* 2003; 60: 21.
144. Schubert M, Minnemann T, Hubler D, et al. Intramuscular testosterone undecanoate: pharmacokinetic aspects of a novel testosterone formulation during long-term treatment of men with hypogonadism. *J Clin Endocrinol Metab* 2004; 89: 5429.
145. Schwartz JB, Volterrani M, Caminiti G, et al. Effects of testosterone on the Q-T interval in older men and older women with chronic heart failure. *Int J Androl* 2011; 34: e415.
146. Seftel AD, Mack RJ, Secrest AR, Smith TM. Restorative increases in serum testosterone levels are significantly correlated to improvements in sexual functioning. *J Androl* 2004; 25: 963–72.
147. Shabsigh R, Kaufman JM, Steidle C, Padma-Nathan H. Randomized study of testosterone gel as adjunctive therapy to sildenafil in hypogonadal men with erectile dysfunction who do not respond to sildenafil alone. *J Urol* 2004; 172: 658–63.
148. Sheffield-Moore M, Dillon EL, Casperson SL, et al. A randomized pilot study of monthly cycled testosterone replacement or continuous testosterone replacement versus placebo in older men. *J Clin Endocrinol Metab* 2011; 96: E1831–E1837.
149. Shigehara K, Konaka H, Koh E, et al. Effects of testosterone replacement therapy on nocturia and quality of life in men with hypogonadism: a subanalysis of a previous prospective randomized controlled study in Japan. *Aging Male*. 2015;18:169.

Supplemental Online Content: Elliott et al. Testosterone therapy in hypogonadal men:  
a systematic review and network meta-analysis.

For peer review only - <http://bmjopen.bmj.com/site/about/guidelines.xhtml>

- 1  
2  
3  
4  
5  
6  
7  
8  
9  
10  
11  
12  
13  
14  
15  
16  
17  
18  
19  
20  
21  
22  
23  
24  
25  
26  
27  
28  
29  
30  
31  
32  
33  
34  
35  
36  
37  
38  
39  
40  
41  
42  
43  
44  
45  
46  
47  
48  
49  
50  
51  
52  
53  
54  
55  
56  
57  
58  
59  
60
150. Shigehara K, Konaka H, Koh E, et al. Effects of testosterone replacement therapy on hypogonadal men with osteopenia or osteoporosis: a subanalysis of a prospective randomized controlled study in Japan (EARTH study). *Aging Male*. 2017;1.
  151. Shigehara K, Sugimoto K, Konaka H, et al. Androgen replacement therapy contributes to improving lower urinary tract symptoms in patients with hypogonadism and benign prostate hypertrophy: a randomised controlled study. *Aging Male* 2011; 14: 53.
  152. Shores MM, Kivlahan DR, Sadak TI, Li EJ, Matsumoto AM. A randomized, double-blind, placebo-controlled study of testosterone treatment in hypogonadal older men with subthreshold depression (dysthymia or minor depression). *J Clin Psychiatry* 2009; 70: 1009–16.
  153. Shores MM, Smith NL, Forsberg CW, Anawalt BD, Matsumoto AM. Testosterone treatment and mortality in men with low testosterone levels. *J Clin Endocrinol Metab* 2012; 97: 2050–8.
  154. Sih R, Morley JE, Kaiser FE, Perry HM, III, Patrick P, Ross C. Testosterone replacement in older hypogonadal men: a 12-month randomized controlled trial. *J Clin Endocrinol Metab* 1997; 82: 1661–7.
  155. Simon D, Charles MA, Lahlou N, et al. Androgen therapy improves insulin sensitivity and decreases leptin level in healthy adult men with low plasma total testosterone: a 3-month randomized placebo-controlled trial. *Diabetes Care* 2001; 24: 2149–51.
  156. Sinclair M, Grossmann M, Hoermann R, Angus PW, Gow PJ. Testosterone therapy increases muscle mass in men with cirrhosis and low testosterone: a randomised controlled trial. *J Hepatol*. 2017;65:906.
  157. Snyder PJ, Bhasin S, Cunningham GR, et al. Effects of Testosterone Treatment in Older Men. *N Engl J Med*. 2016;374:611.
  158. Snyder PJ, Kopperdahl DL, Stephens-Shields AJ, et al. Effect of Testosterone Treatment on Volumetric Bone Density and Strength in Older Men With Low Testosterone: A Controlled Clinical Trial. *JAMA Intern Med*. 2017;177:471.
  159. Spitzer M, Basaria S, Travison TG, Davda MN, DeRogatis L, Bhasin S. The effect of testosterone on mood and well-being in men with erectile dysfunction in a randomized, placebo-controlled trial. *Andrology* 2013; 1: 475–82.
  160. Spitzer M, Basaria S, Travison TG, et al. Effect of testosterone replacement on response to sildenafil citrate in men with erectile dysfunction: a parallel, randomized trial. *Ann Intern Med* 2012; 157: 681–91.
  161. Srinivas-Shankar U, Roberts SA, Connolly MJ, et al. Effects of testosterone on muscle strength, physical function, body composition, and quality of life in intermediate-frail and frail elderly men: a randomized, double-blind, placebo-controlled study. *J Clin Endocrinol Metab* 2010; 95: 639.
  162. Stanworth RD, Akhtar S, Channer KS, et al. The role of androgen receptor CAG repeat polymorphism and other factors which affect the clinical response to testosterone replacement in metabolic syndrome and type 2 diabetes: TIMES2 sub-study. *Eur J Endocrinol* 2014; 170: 193.
  163. Steidle C, Schwartz S, Jacoby K, et al. AA2500 testosterone gel normalizes androgen levels in aging males with improvements in body composition and sexual function. *J Clin Endocrinol Metab* 2003; 88: 2673–81.
  164. Storer TW, Basaria S, Traustadottir T, et al. Effects of testosterone supplementation for 3 years on muscle performance and physical function in older men. *Journal of Clinical Endocrinology and Metabolism*. 2017;102:583.
  165. Storer TW, Bhasin S, Travison TG, et al. Testosterone attenuates age-related fall in aerobic function in mobility limited older men with low testosterone. *Journal of Clinical Endocrinology and Metabolism*. 2016;101:2562.
  166. Stout M, Tew GA, Doll H, et al. Testosterone therapy during exercise rehabilitation in male patients with chronic heart failure who have low testosterone status: a double-blind randomized controlled feasibility study. *Am Heart J* 2012; 164: 893.
  167. Strollo F, Strollo G, More M, et al. Low-intermediate dose testosterone replacement therapy by different pharmaceutical preparations improves frailty score in elderly hypogonadal hyperglycaemic patients. *Aging Male* 2013; 16: 33–7.
  168. Sullivan DH, Roberson PK, Johnson LE, et al. Effects of muscle strength training and testosterone in frail elderly males. *Med Sci Sports Exerc* 2005; 37: 1664–72.
  169. Svartberg J, Agledahl I, Figenschau Y, et al. Testosterone treatment in elderly men with subnormal testosterone levels improves body composition and BMD in the hip. *Int J Impot Res* 2008; 20: 378.
  170. Swerdloff RS, Pak Y, Wang C, et al. Serum Testosterone (T) Level Variability in T Gel-Treated Older Hypogonadal Men: Treatment Monitoring Implications. *Journal of Clinical Endocrinology and Metabolism*. 2015;100:3280.

Supplemental Online Content: Elliott et al. Testosterone therapy in hypogonadal men:  
a systematic review and network meta-analysis.

For peer review only - <http://bmjopen.bmj.com/site/about/guidelines.xhtml>

- 1  
2  
3  
4  
5  
6  
7  
8  
9  
10  
11  
12  
13  
14  
15  
16  
17  
18  
19  
20  
21  
22  
23  
24  
25  
26  
27  
28  
29  
30  
31  
32  
33  
34  
35  
36  
37  
38  
39  
40  
41  
42  
43  
44  
45  
46  
47  
48  
49  
50  
51  
52  
53  
54  
55  
56  
57  
58  
59  
60
- 171.Swerdloff RS, Wang C, Cunningham G, et al. Long-term pharmacokinetics of transdermal testosterone gel in hypogonadal men. *J Clin Endocrinol Metab* 2000; 85: 4500–10.
- 172.Swerdloff RS, Wang C. Three-year follow-up of androgen treatment in hypogonadal men: preliminary report with testosterone gel. *Aging Male* 2003; 6: 207–11.
- 173.Tan RS, Pu SJ. A pilot study on the effects of testosterone in hypogonadal aging male patients with Alzheimer's disease. *Aging Male* 2003; 6: 13–7.
- 174.Tan WS, Low WY, Ng CJ, et al. Efficacy and safety of long-acting intramuscular testosterone undecanoate in aging men: a randomised controlled study. *BJU Int* 2013; 111: 1130.
- 175.Taylor F, Levine L. Clomiphene citrate and testosterone gel replacement therapy for male hypogonadism: Efficacy and treatment cost. *J Sex Med* 2010; 7: 269–76.
- 176.Tenover JS. Effects of testosterone supplementation in the aging male. *J Clin Endocrinol Metab* 1992; 75: 1092–8.
- 177.Thomson S, Koren G, Van SV, Rieder M, Van Uum SHM. Testosterone concentrations in hair of hypogonadal men with and without testosterone replacement therapy. *Therapeutic Drug Monitor* 2009; 31: 779–82.
- 178.Tong SF, Ng CJ, Lee BC, et al. Effect of long-acting testosterone undecanoate treatment on quality of life in men with testosterone deficiency syndrome: a double blind randomized controlled trial. *Asian J Androl* 2012; 14: 604.
- 179.Trabado S, Maione L, Bry-Gaillard H, et al. Insulin-like peptide 3 (INSL3) in men with congenital hypogonadotropic hypogonadism/kallmann syndrome and effects of different modalities of hormonal treatment: A single-center study of 281 patients. *J Clin Endocrinol Metab* 2014; 99: E268–E275.
- 180.Trabado S, Maione L, Salenave S, et al. Estradiol levels in men with congenital hypogonadotropic hypogonadism and the effects of different modalities of hormonal treatment. *Fertil Steril* 2011; 95: 2324–9.
- 181.Traish AM, Haider A, Haider KS, Doros G, Saad F. Long-Term Testosterone Therapy Improves Cardiometabolic Function and Reduces Risk of Cardiovascular Disease in Men with Hypogonadism. 2017;1074248417691136.
- 182.Travison TG, Basaria S, Storer TW, et al. Clinical meaningfulness of the changes in muscle performance and physical function associated with testosterone administration in older men with mobility limitation. *J Gerontol A Biol Sci Med Sci* 2011; 66: 1090–9.
- 183.van den Bergh JP, Hermus AR, Spruyt AI, Sweep CG, Corstens FH, Smals AG. Bone mineral density and quantitative ultrasound parameters in patients with Klinefelter's syndrome after long-term testosterone substitution. *Osteoporos Int* 2001; 12: 55–62.
- 184.Vaughan C, Goldstein FC, Tenover JL. Exogenous testosterone alone or with finasteride does not improve measurements of cognition in healthy older men with low serum testosterone. *J Androl* 2007; 28: 875–82.
- 185.Vigen R, O'Donnell CI, Baron AE, et al. Association of testosterone therapy with mortality, myocardial infarction, and stroke in men with low testosterone levels. *JAMA* 2013; 310: 1829–36.
- 186.Vignera S. La, Calogero AE, D'Agata R, et al. Testosterone therapy improves the clinical response to conventional treatment for male patients with metabolic syndrome associated to late onset hypogonadism. *Minerva Endocrinologica* 2008; 33: 159.
- 187.Vignera S. La, Condorelli R, Vicari E, et al. Original immunophenotype of blood endothelial progenitor cells and microparticles in patients with isolated arterial erectile dysfunction and late onset hypogonadism: Effects of androgen replacement therapy. *Aging Male* 2011; 14: 183–9
- 188.Wang C, Cunningham G, Dobs A, et al. Long-term testosterone gel (AndroGel) treatment maintains beneficial effects on sexual function and mood, lean and fat mass, and bone mineral density in hypogonadal men. *J Clin Endocrinol Metab* 2004; 89: 2085–98.
- 189.Wang C, Swerdloff RS, Iranmanesh A, et al. Effects of transdermal testosterone gel on bone turnover markers and bone mineral density in hypogonadal men. *Clin Endocrinol* 2001; 54: 739–50.
- 190.Wang C, Swerdloff RS, Iranmanesh A, et al. Transdermal testosterone gel improves sexual function, mood, muscle strength, and body composition parameters in hypogonadal men. *J Clin Endocrinol Metab* 2000; 85: 2839–53.
- 191.Wang YJ, Zhan JK, Huang W, et al. Effects of low-dose testosterone undecanoate treatment on bone mineral density and bone turnover markers in elderly male osteoporosis with low serum testosterone. *Int J Endocrinol* 2013: 570413.
- 192.Wiehle RD, Fontenot GK, Wike J, Hsu K, Nydell J, Lipshultz L. Enclomiphene citrate stimulates testosterone production while preventing oligospermia: A randomized phase II clinical trial comparing topical testosterone. *Fertil Steril* 2014; 102: 720–7.

Supplemental Online Content: Elliott et al. Testosterone therapy in hypogonadal men:  
a systematic review and network meta-analysis.

For peer review only - <http://bmjopen.bmj.com/site/about/guidelines.xhtml>

- 1  
2  
3  
4  
5  
6  
7  
8  
9  
10  
11  
12  
13  
14  
15  
16  
17  
18  
19  
20  
21  
22  
23  
24  
25  
26  
27  
28  
29  
30  
31  
32  
33  
34  
35  
36  
37  
38  
39  
40  
41  
42  
43  
44  
45  
46  
47  
48  
49  
50  
51  
52  
53  
54  
55  
56  
57  
58  
59  
60
193. Yaron M, Greenman Y, Rosenfeld JB, et al. Effect of testosterone replacement therapy on arterial stiffness in older hypogonadal men. *Eur J Endocrinol* 2009; 160: 839–46.
194. Yassin A, Salman M, Talib RA, Yassin DJ. Is there a protective role of testosterone against high-grade prostate cancer? Incidence and severity of prostate cancer in 553 patients who underwent prostate biopsy: a prospective data register. *Aging Male*. 2017;():pp:1.
195. Zhang XW, Liu ZH, Hu XW, et al. Androgen replacement therapy improves psychological distress and health-related quality of life in late onset hypogonadism patients in Chinese population. *Chin Med J* 2012; 125: 3806–10.
196. Zitzmann M, Depenbusch M, Gromoll J, Nieschlag E. Prostate volume and growth in testosterone-substituted hypogonadal men are dependent on the CAG repeat polymorphism of the androgen receptor gene: a longitudinal pharmacogenetic study. *J Clin Endocrinol Metab* 2003; 88: 2049–54.

## eAppendix 4: Characteristics of the included RCTs and NRS

eTable 1: Characteristics of included RCTs that reported at least 1 outcome of interest

| Author, year, page (companion publications)                                                                                                                                                         | Population*                                                                                                                                           | Duration | Groups (no. randomized)                                  | Age, yr, mean (SD);                         | Baseline Total T, mean (SD), nmol/L          | Industry funding |
|-----------------------------------------------------------------------------------------------------------------------------------------------------------------------------------------------------|-------------------------------------------------------------------------------------------------------------------------------------------------------|----------|----------------------------------------------------------|---------------------------------------------|----------------------------------------------|------------------|
| Dias 2016, p. 1865 (Dias 2017 p.143; Dias 2016, p. 33; Dias 2017, p. 31)                                                                                                                            | Older men with low testosterone                                                                                                                       | 12 mo    | 1% Gel, 50 mg/d (16)<br>Placebo (13)                     | 72 (SEM 1)<br>72 (SEM 1)                    | 10.4 (1.9)<br>10.5 (2.1)                     | No               |
| Chillaron 2016, p. 849                                                                                                                                                                              | T1D                                                                                                                                                   | 22 wk    | IM TU 1000 mg/10 wk (6)<br>Placebo (7)                   | 47.9 (7.3)<br>45.2 (11.7)                   | 12.4 (3.5)<br>9.9 (4.5)                      | Yes              |
| Brock 2016, p. 699 (Maggi 2017, p. 1220)                                                                                                                                                            | ≥ 1 symptom of testosterone deficiency                                                                                                                | 12 wk    | 2% Testosterone solution, 60 mg/d (358)<br>Placebo (357) | 54.7 (10.6)<br>55.9 (11.4)                  | 7.0 (2.3)<br>7.0 (2.3)                       | Yes              |
| Dhindsa 2016, p. 82                                                                                                                                                                                 | T2DM                                                                                                                                                  | 24 wk    | IM TC, 250 mg/2wk (22)<br>Placebo (22)                   | 54.6 (7.9) (NR by group)                    | 8.7 (2.8) (NR by group)                      | No               |
| Konaka 2016, p. 25 (Shigehara 2017, p. 1; Shigehara 2015, p. 169)                                                                                                                                   | Late onset hypogonadism                                                                                                                               | 52 wk    | IM TE, 250 mg/4 wk (169)<br>No treatment (165)           | 65.7 (9)<br>67.6 (9.4)                      | Free T 7.1 (3.2)<br>6.7 (3.5) pg/ml          | No               |
| Magnussen 2016, p. 980                                                                                                                                                                              | T2DM                                                                                                                                                  | 24 wk    | 1% gel, 50 mg/d (22)<br>Placebo (21)                     | 61 (6)<br>59 (6)                            | 7.1 (95%CI 6.6-11.9)<br>9.4 (95%CI 8.1-12.5) | Yes              |
| Ng Tang Fui 2016, p. 153 (Ng Tang Fui 2017, p. 420)                                                                                                                                                 | BMI ≥ 30                                                                                                                                              | 56 wk    | IM TU, 1000 mg/10 wk (49)<br>Placebo (51)                | 54.3 (IQR 47.3-59.8)<br>52.8 (IQR47.6-60.1) | 8.2 (2.5)<br>8.4 (2.3)                       | Yes              |
| Sinclair 2016, p. 906                                                                                                                                                                               | Cirrhosis                                                                                                                                             | 54 wk    | IM TU, 1000 mg/12 wk (50)<br>Placebo (51)                | 55.5 (IQR 52-60)<br>54.0 (IQR 50-59)        | 9.3 (IQR 3.9-17)<br>9.1 (2.7-12.7)           | Yes              |
| Snyder 2016 p. 611† (Cunningham 2016, p. 3096; Snyder 2017, p. 471; Roy 2017, p. 480; Resnick 2017, p. 717; Cunningham 2015, p. 1146; Abd Alamir 2016, p. 95; Swerdloff 2015, p. 3280; Budoff 2017, | Older men with decreased libido or sexual function (Sexual function trial); limited mobility (Physical function trial); low vitality (Vitality trial) | 12 mo    | 1% gel, 50 mg/d (395)<br>Placebo (395)                   | 72.1 (5.7)<br>72.3 (5.8)                    | 232 (63)<br>236 (67)ng/dL                    | Mix              |

Supplemental Online Content: Elliott et al. Testosterone therapy in hypogonadal men: a systematic review and network meta-analysis.

For peer review only - <http://bmjopen.bmj.com/site/about/guidelines.xhtml>

| p. 708)                                                                              |                                      |       |                                                                                    |                                        |                                     |     |
|--------------------------------------------------------------------------------------|--------------------------------------|-------|------------------------------------------------------------------------------------|----------------------------------------|-------------------------------------|-----|
| <b>Basaria 2015, p. 570<br/>(Storer 2017, p. 583)</b>                                | Older men                            | 3 yr  | 1% gel, 75 mg/d (156)<br>Placebo (152)                                             | 66.9 (5.0)<br>68.3 (5.3)               | 10.7 (2.2)<br>10.7 (2.3)            | Yes |
| <b>Basaria 2015, p. 280<br/>(Huang 2016, p. 232)</b>                                 | Opioid-induced hypogonadism          | 12 wk | 1% gel, 50 mg/d (43)<br>Placebo (41)                                               | 48 (9)<br>50 (6)                       | 8.2 (3.4)<br>7.7 (3.0)              | Yes |
| <b>Cherrier 2015, p. 421</b>                                                         | Mild cognitive impairment            | 6 mo  | Gel, 50-100 mg/d (10)<br>Placebo (12)                                              | 70.5 (8.2)                             | 10.7 (3.2)<br>9.8 (2.7)             | Mix |
| <b>Paduch 2015, p.2956</b>                                                           | Ejaculatory dysfunction              | 16 wk | 2% solution, 60 mg/d (36)<br>Placebo (40)                                          | 48.4 (9.8)<br>52.7 (9.3)               | 7.4 (1.9)<br>7.7 (1.8)              | Yes |
| <b>Borst 2014, p. E433</b>                                                           | Hypogonadal men                      | 12 mo | Placebo (16)<br>IM TE, 125 mg/wk (14)                                              | 70.8 (9.7)<br>69.2 (8.0)               | 8.5 (10.1)<br>9.2 (11.9)            | Mix |
| <b>Gianatti 2014, p. 2098<br/>(Gianatti 2014, p. 3821;<br/>Gianatti 2016, p. 55)</b> | Type 2 diabetes                      | 40 wk | Placebo (43)<br>IM TU, 1000 mg/12 wk (45)                                          | 62 (7.4)<br>62 (8.1)                   | 8.5 (2.8)<br>8.7 (3.0)              | Yes |
| <b>Hackett 2013, p.1891<br/>(Hackett 2013, p. 1612,<br/>Hackett 2014)</b>            | T2DM and symptoms of hypogonadism    | 30 wk | Placebo (102)<br>IM TU, 1000 mg/12 wk (97)                                         | 62.0 (9.3)<br>61.2 (10.5)              | 8.9 (3.8)<br>9.2 (3.1)              | Yes |
| <b>Wang 2013, p. 1</b>                                                               | Osteoporosis                         | 24 mo | Placebo (62)<br>Oral TU, 20 mg/d (62)<br>Oral TU, 40 mg/d (62)                     | 68.0 (4.8)<br>68.4 (5.5)<br>68.1 (5.4) | 7.6 (0.7)<br>7.6 (0.9)<br>7.4 (0.8) | No  |
| <b>Behre 2012, p. 198</b>                                                            | AMS score >36                        | 6 mo  | Placebo (179)<br>1% gel, 50 mg/d (183)                                             | 62.1 (6.3)<br>61.9 (6.6)               | 10.6 (2.6)<br>10.4 (2.6)            | Yes |
| <b>Spitzer 2012, p. 681<br/>(Spitzer 2013)</b>                                       | Erectile dysfunction                 | 14 wk | Placebo (70)<br>1% gel, 100 mg/d (70)                                              | 54.6 (8.5)<br>55.1 (8.3)               | 8.8 (2.4)<br>8.6 (2.2)              | No  |
| <b>Stout 2012, p. 893</b>                                                            | Chronic heart failure                | 12 wk | Placebo (20)<br>Sustanon, 100 mg/2 wk (20)                                         | 65.9 (8.8)<br>68.3 (5.3)               | 11.2 (2.6)<br>10.4 (2.7)            | No  |
| <b>Zhang 2012, p. 3806</b>                                                           | Positive score on ADAM questionnaire | 6 mo  | Vitamin E/C (80)<br>Oral TU, 120 or 160 mg/d<br>(based on T level at baseline)(80) | 61.1 (7.1)<br>59.4 (6.3)               | 7.7 (0.8)<br>8.0 (0.7)              | No  |
| <b>Ho 2011, p. 260 (Tan<br/>2013, Tong 2012)</b>                                     | At least mild AMS symptoms           | 42 wk | Placebo (60)<br>IM TU, 1000 mg/12 wk (60)                                          | 53.0 (8.2)<br>53.4 (7.4)               | 8.9 (2)<br>9.1 (1.8)                | Yes |
| <b>Jones 2011, p. 828</b>                                                            | MetS or T2DM                         | 12 mo | Placebo (112)                                                                      | 59.9 (9.4)                             | 9.5 (3.3)                           | Yes |

Supplemental Online Content: Elliott et al. Testosterone therapy in hypogonadal men:  
a systematic review and network meta-analysis.

For peer review only - <http://bmjopen.bmj.com/site/about/guidelines.xhtml>

|                                                                                                  |                                          |          |                                                                   |                             |                                         |     |
|--------------------------------------------------------------------------------------------------|------------------------------------------|----------|-------------------------------------------------------------------|-----------------------------|-----------------------------------------|-----|
| <b>(Stanworth 2014)</b>                                                                          | with at least 2 symptoms of hypogonadism |          | 2% gel, 60 mg/d (108)                                             | 59.9 (9.1)                  | 9.2 (2.6)                               |     |
| <b>Kaufman 2011, p. 2079</b>                                                                     | “otherwise healthy”                      | 6 mo     | Placebo (40)<br>1.62% gel, 40.5 mg/d (234)                        | 55.5 (10.3)<br>53.6 (9.5)   | 10.2 (NR)<br>9.8 (NR)                   | Yes |
| <b>Sheffield-Moore 2011, p. E1831 (Fitts 2015, p. E223)</b>                                      | Community-dwelling men                   | 5 mo     | Placebo (8)<br>IM TE, 100 mg/wk (8)                               | 65 (3)<br>73 (8)            | 11.8 (2.9)<br>11.9(2.9)                 | No  |
| <b>Shigehara 2011, p. 53</b>                                                                     | Benign prostate hypertrophy              | 12 mo    | No treatment (26)<br>IM TE, 250 mg/4 wk (26)                      | 68.9 (9.1)<br>72 (6.5)      | Free T, pg/ml<br>6.7 (1.9)<br>7.0 (1.7) | NR  |
| <b>Aversa 2010, p. 776</b>                                                                       | MetS or T2DM                             | 6 mo     | Placebo (10)<br>Oral TU 160 mg/d (10)<br>IM TU 1000 mg/12 wk (32) | 55 (5)<br>57 (8)<br>58 (10) | 11.1<br>(NR by group)                   | NR  |
| <b>Aversa 2010, p. 3495</b>                                                                      | MetS or T2DM                             | 12 mo    | Placebo (10)<br>IM TU, 1000 mg/12wk (40)                          | 57 (8)<br>58 (10)           | 9.0 (1.7)<br>8.33 (2.4)                 | NR  |
| <b>Basaria 2010, p. 109 (Bachman 2014, Huang 2013, Basaria 2013, Travison 2011; Storer 2016)</b> | Limited mobility                         | 6 mo     | Placebo (103)<br>1% gel, 100 mg/d (106)                           | 74 (5)<br>74 (6)            | 8.2 (2.3)<br>8.7 (2.0)                  | No  |
| <b>Kalinchenko 2010, p. 602 (Giltay 2010)</b>                                                    | MetS                                     | 30 wk    | Placebo (71)<br>IM TU, 1000 mg/12wk (113)                         | 52.8 (9.67)<br>51.6 (9.76)  | 7.5 (5.2)<br>6.7 (3.0)                  | Yes |
| <b>Kenny 2010, p. 1134</b>                                                                       | Low bone mass and frailty                | 12–24 mo | Placebo (62)<br>1% gel, 5 mg/d (69)                               | 76.3 (8.0)<br>77.9 (7.3)    | 14.5 (6.7)<br>13.2 (6.2)                | Mix |
| <b>Srinivas-Shankar 2010, p. 639 (O’Connell 2010, Atkinson 2010)</b>                             | Intermediate-frail and frail             | 6 mo     | Placebo (136)<br>1% gel, 50 mg/d (138)                            | 73.9 (6.4)<br>73.7 (5.7)    | 10.9 (3.1)<br>11 (3.2)                  | Yes |
| <b>Caminiti 2009, p. 919 (Schwartz 2011)</b>                                                     | Chronic heart failure                    | 12 wk    | Placebo (35)<br>IM TU, 1000 mg/6 wk (35)                          | 69 (66–74)<br>71 (67–76)    | 7.3 (7.3)<br>8.0 (6.2)                  | No  |
| <b>Chiang 2009, p. 467</b>                                                                       | Hypogonadal men                          | 3 mo     | Placebo (20)<br>1% gel, 50 mg/d (20)                              | NR                          | NR                                      | NR  |
| <b>Emmelot-Vonk, 2009, p. 129 (Emmelot-Vonk 2008, Nakhai-Pour 2007, Buisson 2010)</b>            | Moderately low T levels                  | 26 wk    | Placebo (117)<br>Oral TU, 160 mg/d (120)                          | 67.4 (4.9)<br>67.1 (5.0)    | 10.4 (1.9)<br>11.0 (1.9)                | No  |

Supplemental Online Content: Elliott et al. Testosterone therapy in hypogonadal men: a systematic review and network meta-analysis.

For peer review only - <http://bmjopen.bmj.com/site/about/guidelines.xhtml>

|                                   |                                                      |             |                                                                                       |                                               |                                      |     |
|-----------------------------------|------------------------------------------------------|-------------|---------------------------------------------------------------------------------------|-----------------------------------------------|--------------------------------------|-----|
| <b>Heufelder 2009, p. 726</b>     | MetS and T2DM                                        | 52 wk       | Placebo (16)<br>1% gel, 50 mg/d (16)                                                  | 55.9 (6)<br>57.3 (5.6)                        | 10.4 (0.8)<br>10.5 (0.8)             | Yes |
| <b>Hohl 2009, p. 989</b>          | High AMS score                                       | 12 or 14 wk | IM TU, 1000 mg/6 wk (10)<br>IM TC, 200 mg/4wk (11)<br>Durateston, IM, 250 mg/4wk (11) | 59.6 (8.9)<br>59.6 (7.1)<br>60.4 (8.8)        | 9.9 (1.1)<br>10.1 (1.1)<br>9.9 (1.5) | No  |
| <b>Mathur 2009, p. 443</b>        | Chronic angina pectoris                              | 12 mo       | Placebo (7)<br>IM TU, 1000 mg/12 wk (8)                                               | 67.8 (7.9)<br>62.1 (5.2)                      | 10.1 (2.8)<br>9.8 (1.9)              | Yes |
| <b>Morales 2009, p. 104</b>       | Sexual dysfunction                                   | 4 mo        | Placebo (29)<br>Oral TU, 160 mg/d (29)                                                | 60.2 (9.6)<br>59.0 (10.6)                     | 10.0 (5.5)<br>10.2 (4.9)             | Yes |
| <b>Shores 2009, p. 1009</b>       | Dysthymia or minor depression                        | 12 wk       | Placebo (16)<br>1% gel, 75 mg/d (17)                                                  | 61.7 (7.0)<br>57.1 (5.7)                      | 9.3 (3.4)<br>10.1 (3.7)              | Mix |
| <b>Agledahl 2008, p. 641</b>      | Subnormal total T                                    | 52 wk       | Placebo (13)<br>IM TU, 1000 mg/12 wk (14)                                             | 69.3 (5.0)<br>68.9 (5.4)                      | 8.2 (2.4)<br>8.5 (1.7)               | Mix |
| <b>Basurto 2008, p. 140</b>       | Low total T                                          | 12 mo       | Placebo (23)<br>IM TE, 250 mg/3wk (25)                                                | 63.1 (7.7)<br>63.2 (8.5)                      | 10.8 (1.3)<br>10.4 (1.1)             | No  |
| <b>Raynaud 2008, p. 168</b>       | Hypogonadal men                                      | 6 mo        | Patch, 4.8 mg/d(188)<br>IM TE, 250 mg/3 wk (36)                                       | 42.0 (12.7)<br>40.7 (10.5)                    | 4.6 (3.2)<br>5.1 (3.3)               | Yes |
| <b>Svartberg 2008, p. 378</b>     | NR                                                   | 12 mo       | Placebo (19)<br>IM TU, 1000 mg/12 wk (19)                                             | 69 (5)<br>69 (5)                              | 8.2 (2.1)<br>8.4 (1.7)               | Mix |
| <b>Chiang 2007, p. 411</b>        | Hypogonadal men                                      | 3 mo        | Placebo (20)<br>1% gel, 50 mg/d (20)                                                  | 56.1 (14.6)<br>47.9 (17.0)                    | 9.1 (6.9)<br>7.4 (5.6)               | Yes |
| <b>Brockenbrough 2006, p. 251</b> | Hemodialysis-dependent end-stage renal disease       | 6 mo        | Placebo (21)<br>1% gel, 100 mg/d (19)                                                 | 53.0 (17.2)<br>58.9 (14.9)                    | 7.0 (3.0)<br>7.6 (2.2)               | Yes |
| <b>Marks 2006, p. 2351</b>        | Symptoms of late-onset hypogonadism                  | 6 mo        | Placebo (22)<br>IM TE, 150 mg/2wk (22)                                                | 68 (NR)<br>70 (NR)                            | 8.7 (1.6)<br>7.7 (1.4)               | Mix |
| <b>Merza 2006, p. 381</b>         | Sexual dysfunction                                   | 6 mo        | Placebo (19)<br>Patch, 5 mg/d (20)                                                    | 59.7 (10.2)<br>63.0 (9.0)                     | 7.5 (2.5)<br>8.4 (3.3)               | Yes |
| <b>Kuhnert 2005, p. 317</b>       | Primary, secondary, LOH and symptoms of T deficiency | 24 wk       | Patch, 5 mg/d (52)<br>2.5%, gel, 125 mg/d (56)<br>2.5%, scrotal gel, 25 mg/d (54)     | 53 (IQR 16)<br>52.2 (IQR 22.5)<br>50 (IQR 21) | NR                                   | Yes |

Supplemental Online Content: Elliott et al. Testosterone therapy in hypogonadal men: a systematic review and network meta-analysis.

For peer review only - <http://bmjopen.bmj.com/site/about/guidelines.xhtml>



|                                                                                    |                                                                     |       |                                                                                       |                                                        |                                                  |     |
|------------------------------------------------------------------------------------|---------------------------------------------------------------------|-------|---------------------------------------------------------------------------------------|--------------------------------------------------------|--------------------------------------------------|-----|
| <b>Orengo 2005, p. 20</b>                                                          | Treatment-resistant depression                                      | 12 wk | Placebo (5)<br>1% gel, 50 mg/d (7)                                                    | 63 (8.5) (NR by group)                                 | 8.9 (1.7)<br>10.2 (2.3)                          | No  |
| <b>Amory 2004, p. 503 (Page 2005, Vaughan 2007)</b>                                | T below the range of normal for young adult men                     | 36 mo | Placebo (24)<br>IM TE 200 mg/2wk (24)                                                 | 71 (4)<br>71 (4)                                       | 10.1 (2.1)<br>9.9 (1.6)                          | No  |
| <b>Cavallini 2004, p. 641</b>                                                      | Symptoms of androgen decline                                        | 6 mo  | Placebo (45)<br>Oral TU, 160 mg/d (40)                                                | 63 (NR)<br>64 (NR)                                     | 10.5 (2.1)<br>9.9 (1.8)                          | No  |
| <b>Schubert 2004, p. 5429 (Jockenhovel 2009, Jockenhovel 2009, Minnemann 2008)</b> | Primary or secondary hypogonadism                                   | 30 wk | IM TU, 1000 mg/9 wk (20)<br>IM TE, 250 mg/3 wk (20)                                   | 41.1 (13.4)<br>36.3 (12.3)                             | 3.9 (4.4)<br>2.7 (2.3)                           | Mix |
| <b>Shabsigh 2004, p. 658 (Burnett 2013, Wang 2001, Swerdloff 2000)</b>             | Erectile dysfunction not responsive to sildenafil                   | 12 wk | Placebo (36)<br>1% gel, 50 mg/d (39)                                                  | 59.1 (9.4)<br>56.8 (10.2)                              | 65% had T < 10.4 (NR by group)                   | Yes |
| <b>Boyanov 2003, p. 1</b>                                                          | T2DM, obesity, and "symptoms of andropause or erectile dysfunction" | 3 mo  | No treatment (24)<br>Oral TU, 120 mg/d (24)                                           | All: 57.5 (4.8) (NR by group)                          | 10.76 (11.20)<br>9.56 (2.33)                     | NR  |
| <b>McNicholas 2003, p. 69</b>                                                      | ≥ 1 symptoms of "low T"                                             | 90 d  | Patch, 5 mg/d (68)<br>1% gel, 50 mg/d (68)<br>1% gel, 100 mg/d (72)                   | 57.9 (10.2)<br>59.0 (9.5)<br>56.7 (10.3)               | 7.90 (2.2)<br>7.95 (2.2)<br>7.92 (2.4)           | Yes |
| <b>Steidle 2003, p. 2673 (Seftel 2004)</b>                                         | ≥ 1 symptoms of "low T"                                             | 90 d  | Placebo (99)<br>Patch, 5 mg/d (102)<br>1% gel, 50 mg/d (99)<br>1% gel, 100 mg/d (106) | 56.8 (10.8)<br>60.5 (9.7)<br>58.1 (9.7)<br>56.8 (10.6) | 7.9 (2.8)<br>8.3 (2.4)<br>8.1 (2.0)<br>8.1 (2.1) | Yes |
| <b>Tan 2003, p. 13</b>                                                             | Alzheimer's disease                                                 | 12 mo | Placebo (5)<br>IM TE, 200mg/2wk (5)                                                   | 68.9 (NR)<br>72.4 (NR)                                 | NR<br>3.6 (NR)                                   | No  |
| <b>Ferrando 2002, p. 358 (Ferrando 2003)</b>                                       | "Healthy older men"                                                 | 6 mo  | Placebo (5)<br>IM TE 50–400 mg/wk (7)                                                 | 67 (6.7)<br>68 (7.9)                                   | 9.8 (4.3)<br>12.4 (4.4)                          | No  |
| <b>Kang 2002, p. 862</b>                                                           | Coronary artery disease                                             | 12 wk | Placebo (17)<br>Oral TU, 160 mg/d (18)                                                | 58 (9)<br>57 (7)                                       | Free T, pg/ml 13.8 (1.8)<br>9.9 (3.1)            | NR  |
| <b>Simon 2001, p. 2149</b>                                                         | Healthy adult                                                       | 3 mo  | Placebo (6)                                                                           | 55.4 (3.6)                                             | 9.4 (1.0)                                        | NR  |

Supplemental Online Content: Elliott et al. Testosterone therapy in hypogonadal men: a systematic review and network meta-analysis.

For peer review only - <http://bmjopen.bmj.com/site/about/guidelines.xhtml>

|                                                                   |                                               |       |                                                                           |                                           |                                     |     |
|-------------------------------------------------------------------|-----------------------------------------------|-------|---------------------------------------------------------------------------|-------------------------------------------|-------------------------------------|-----|
|                                                                   | men                                           |       | Gel, 125 mg/d (6)                                                         | 52.8 (4.2)                                | 8.3 (0.3)                           |     |
| <b>Bhasin 2000, p. 763</b>                                        | HIV-infected with weight loss                 | 16 wk | Placebo (14)<br>IM TE, 100 mg/wk (17)                                     | 41.8 (9.4)<br>40.8 (4.9)                  | 6.1 (2.9)<br>7.1 (3.0)              | No  |
| <b>Wang 2000, p. 2839</b>                                         | Primary, secondary or late-onset hypogonadism | 90 d  | Patch, 5 mg/d (76)<br>1% gel, 50 mg/d (76)<br>1% gel, 100 mg/d (78)       | 51.1 (NR)<br>51.3 (NR)<br>51.0 (NR)       | 8.2 (4.8)<br>8.2 (4.6)<br>8.6 (4.8) | Mix |
| <b>Clague 1999, p. 261</b>                                        | Community-living                              | 3 mo  | Placebo (7)<br>IM TE, 200 mg/2wk (7)                                      | 65.3 (1.8)<br>68.1 (6.6)                  | 11.6 (0.9)<br>11.3 (1.7)            | No  |
| <b>Dobs 1999, p. 3469</b>                                         | Receiving TRT for at least 3 mo               | 24 wk | Patch, 5 mg/d (33)<br>IM TE, 200 mg/2wk (33)                              | 44.3 (11.1)<br>44.9 (11.6)                | 5.8 (2.7)<br>6.3 (3.3)              | Mix |
| <b>Bhasin 1998, p. 3155 (Arver 1999)</b>                          | HIV                                           | 12 wk | Placebo (21)<br>Patch, 5 mg/d (20)                                        | NR                                        | 7.3 (2.9)<br>9.0 (1.7)              | Mix |
| <b>Grinspoon 1998, p. 18 (Grinspoon 2000)</b>                     | AIDS wasting syndrome                         | 6 mo  | Placebo (26)<br>IM TE, 300 mg/3wk (26)                                    | 44 (9)<br>40 (7)                          | 10.1 (6.4)<br>11.3 (5.4)            | No  |
| <b>Jockenhovel 1997, p. 2510</b>                                  | Primary or secondary androgen deficiency      | 12 wk | IM TE, 250 mg/3 wk (10)<br>Pellets, 1200 mg (12)                          | 30.0 (7.3)<br>36.3 (11.1)                 | 1.6 (1.3)<br>1.9 (1.1)              | NR  |
| <b>Jockenhovel 1997, p. 293 (Jockenhovel 1999, Schubert 2001)</b> | Primary or secondary androgen deficiency      | 210 d | Oral TU, 160 mg/d (13)<br>IM TE, 250 mg/3wk (15)<br>Pellets, 1200 mg (15) | 34.5 (14.1)<br>31.8 (10.1)<br>35.8 (10.4) | 2.9 (1.4)<br>2.3 (2.3)<br>2.7 (1.5) | NR  |
| <b>Sih 1997, p. 1661</b>                                          | Community-dwelling healthy men                | 12 mo | Placebo (15)<br>IM TC, 200 mg/2wk (17)                                    | 68 (6)<br>65 (7)                          | 8.1 (0.7)<br>10.2 (0.9)             | NR  |

Note: ADAM = Androgen Deficiency of the Aging Male, AMS = Aging Males' Symptoms [scale], CI = confidence interval, IM = intramuscular, IQR = interquartile range, LOH = late onset hypogonadism, MetS = metabolic syndrome, NR = not reported, SD = standard deviation, T = testosterone, T1D, type 1 diabetes, T2DM = type 2 diabetes mellitus, TC = testosterone cypionate, TE = testosterone enanthate, TRT = testosterone replacement therapy, TU = testosterone undecanoate.

\*All RCTs involved men that were either described as hypogonadal and met the cut-off for hypogonadism (total T < 12 nmol/L or free T < 225 pmol/L) or reported total or free T below these cut-off points.

†The Testosterone Trials were a coordinated set of seven trials. In order to enroll, participants had to qualify for at least one of the Sexual Function Trial, Physical Function Trial, or the Vitality Trial (NCT00799617).

‡Blend of testosterone propionate, testosterone phenylpropionate, testosterone isocaproate, and testosterone decanoate.

Supplemental Online Content: Elliott et al. Testosterone therapy in hypogonadal men:  
a systematic review and network meta-analysis.

For peer review only - <http://bmjopen.bmj.com/site/about/guidelines.xhtml>

eTable 2: Characteristics of included non-randomized studies that reported at least one outcome of interest

| Study                         | Population*                                                              | Duration                                | Group (no. in group)                                                                                                | Age, yr, mean (SD)                       | Baseline total T, mean (SD), nmol/L†  | Industry funding |
|-------------------------------|--------------------------------------------------------------------------|-----------------------------------------|---------------------------------------------------------------------------------------------------------------------|------------------------------------------|---------------------------------------|------------------|
| <b>Retrospective cohort</b>   |                                                                          |                                         |                                                                                                                     |                                          |                                       |                  |
| <b>Cheetham 2017, p. 491</b>  | ≥ 40 yrs with documented androgen deficiency                             | Mean follow-up: 4.4 years (mean)        | TRT (injection, oral, topical), dose NR (8808)<br>Never-TRT (35527)                                                 | 58.4 (NR)<br>59.8 (NR)                   | TRT group: 7.4 (IQR 5.5-8.8)**        | No               |
| <b>Layton 2015, p. 1187</b>   | New users of TRT‡                                                        |                                         | Gel (114,918)<br>Injection (111,354)<br>Patch (9,906)                                                               | Range: 52.4 (15.1) to 72.7 (6.7)§        | NR††                                  | No               |
| <b>Pastuszak 2015, p. 165</b> | New TRT users or had been off TRT for ≥ 3 or mo                          | 26.2 (10.6)<br>29.8 (8.8) 28.2 (8.6) mo | Gel (1% 50–100 mg/d and 1.62% 20.25–80.1 mg/d) (47)<br>IM TE or TC, 100–200mg/wk (57)<br>Pellets, 75 mg/3–6 mo (74) | 54.1 (9.8)<br>42.5 (12.3)<br>53.8 (13.0) | 10.4 (3.1)<br>10.6 (5.7)<br>9.3 (5.8) | No               |
| <b>Ramasamy 2016</b>          | ≥ 65 yr and ≥3 hypogonadal symptoms                                      | 3.4-3.8 yr                              | TRT, dose NR (153)<br>No treatment (64)                                                                             | 74 (6.3)<br>75(6)                        | NR                                    | NR               |
| <b>Aydogdu 2013, p. 243</b>   | IHH                                                                      | 24 wk                                   | Sustanon, ¶ IM 250 mg/3wk (28)<br>1% gel, 50 mg/d (24)                                                              | 20.9 (1.4)<br>21.3 (1.6)                 | 0.9 (0.6)<br>1.4 (1.3)                | No               |
| <b>Vigen 2013, p. 1829</b>    | Men who underwent coronary angiography at a VA medical centre            | Mean follow-up: 840 d                   | TRT, dose NR (1223)<br>No treatment (7486)                                                                          | 60.6 (7.6)<br>63.8 (9.0 yr)              | 6.1 (2.2)<br>7.2 (2.6)                | NR               |
| <b>Shores 2012, p. 2050</b>   | > 40 yr treated at a VA medical center                                   | 20.2 (16.7) mo                          | TRT, dose NR (398)<br>No treatment (633)                                                                            | 62.1 (10.6)                              | 5.6 (2.2)<br>6.7 (1.9)                | No               |
| <b>Rhoden 2006, p. 201</b>    | Hypogonadal men with negative prostate biopsy prior to initiation of TRT | 12 mo                                   | IM TRT, dose NR (33)<br>1% ge, dose NR (25)                                                                         | 58.3                                     | 10.3 (5.4)<br>10.2 (3.1)              | No               |
| <b>Guay 2000, p. 132</b>      | Men with ED and primary or secondary hypogonadism                        | 2-3 mo                                  | IM TE, 200–300 mg/2-3 wk (25)<br>Patch, 5 mg/d (16)                                                                 | 40–80                                    | Free T:<br>8.1–9.7 pg/ml              | NR               |
| <b>Hajjar 1997, p. 3793</b>   | Elderly men                                                              | 24 mo                                   | IM TE or TC, IM 200 mg/2 wk (45)<br>No treatment (27)                                                               | 71.8 (SE 1.7)<br>69.9 (SE 1.9)           | 10.8 (4.7)<br>9.6 (3.8)               | NR               |
| <b>Prospective cohort</b>     |                                                                          |                                         |                                                                                                                     |                                          |                                       |                  |
| <b>Debruyne</b>               | ≥18 years with a                                                         | 36 mo                                   | TRT, dose NR (750)                                                                                                  | 58.9 (10.3)                              | 8.3 (3.9)                             | Yes              |

Supplemental Online Content: Elliott et al. Testosterone therapy in hypogonadal men: a systematic review and network meta-analysis.

For peer review only - <http://bmjopen.bmj.com/site/about/guidelines.xhtml>

|                                                  |                                                                  |             |                                                                               |                            |                                        |     |
|--------------------------------------------------|------------------------------------------------------------------|-------------|-------------------------------------------------------------------------------|----------------------------|----------------------------------------|-----|
| <b>2017, p. 216</b>                              | diagnosis of hypogonadism                                        |             | No TRT (249)                                                                  | 59.7 (11.1)                | 9.4 (3.7)                              |     |
| <b>Traish 2016, p. 1</b>                         | Symptoms of hypogonadism                                         | Up to 8 yr  | IM TU, 1000 mg/12wk (360)<br>No TRT (296)                                     | 57.4 (7.3)<br>64.8 (4.3)   | 9.8 (1.3)<br>9.6 (1.2)                 | Yes |
| <b>Yassin 2017, p. 1</b>                         | Treated or untreated hypogonadal men                             | 6 yr        | TRT, dose NR (42)<br>No treatment (162)                                       | 61.3 (4.7)                 | ≤ 12.1<br>7.1 (2.3)                    | NR  |
| <b>Jung 2016, p. 194</b>                         | Symptoms of hypogonadism                                         | 8 mo        | TU, 1000 mg/3 mo + lifestyle modification (54)<br>Lifestyle modification (52) | 56.7 (12.6)<br>57.8 (11.4) | 8.7 (2.1)<br>9 (2.4)                   | No  |
| <b>Francomano 2014, p. 401</b>                   | Severely obese men (mean BMI 42) with ≥ symptoms of hypogonadism | 54 wk       | DPE (12)<br>DPE + IM TU, 1000 mg/12 wk (12)                                   | 53 (8)<br>56 (9)           | 8.2 (1.8)<br>8.5 (1.8)                 | NR  |
| <b>Blick 2013, p. 30</b>                         | HIV/AIDS                                                         | 12 mo       | 1% gel (Androgel), 50 mg/d (92)<br>1% gel (Testim), 50 mg/d (75)              | 49.5 (8.1)                 | 13.9 (5.5)<br>13.7 (7.2)               | Yes |
| <b>Aversa 2012, p. 96</b>                        | Middle-aged men with LOH and MetS                                | 36 mo       | IM TU, 1000 mg/12 wk (40)<br>No treatment (20)                                | 58 (10)<br>57 (8)          | 8.3 (2.4)                              | NR  |
| <b>Dean 2005, p. 87</b>                          | 21–81 yr                                                         | Up to 12 mo | 1% gel, 50 mg/d (NR)<br>1% gel, 100 mg/d (NR)                                 | 58.5 (10.0)                | 8.1 (2.1)                              | NR  |
| <b>Wang 2004, p. 2085 (Swerdloff 2003 p.207)</b> | 19–68 yr                                                         | 36 mo       | 1% gel, 50 mg/d (NR)<br>1% gel, 75 mg/d (NR)<br>1% gel, 100 mg/d (NR)         | 51.5 (0.9)                 | 14.1 (1.3)<br>22.4 (2.7)<br>25.6 (2.4) | No  |

Note: DPE = diet plus exercise, ED = erectile dysfunction, IHH = Idiopathic hypogonadotropic hypogonadism, IM = intramuscular, IQR = interquartile range, LOH = late-onset hypogonadism, MetS = metabolic syndrome, NR = not reported, SE = standard error, SD = standard deviation, T = testosterone, TC = testosterone cypionate, TE = testosterone enanthate, TRT = testosterone replacement therapy, VA = Veterans Affairs.

\*All studies involved men that were either described as hypogonadal and met the cut-off for hypogonadism (total T < 12 nmol/L or free T < 225 pmol/L) or reported total or free T below these cut-off points.

†Unless otherwise stated.

‡Full cohort includes patients with testosterone levels in the normal range; data extracted only for patients with total testosterone < 300 ng/dl (10.4 nmol/L).

¶Blend of testosterone propionate, testosterone phenylpropionate, testosterone isocaproate, and testosterone decanoate.

§Data provided separately for 3 databases. Range represents the high and low ages (SD) across the three databases.

\*\*Baseline testosterone level not reported for the never-TRT group. In both the TRT group and the no TRT group, 98%–99% of patients had a total T level < 10.4 nmol/L at baseline.

††Mean total testosterone level not provide among patients with a “low” testosterone level (< 10.4 nmol/L).

Supplemental Online Content: Elliott et al. Testosterone therapy in hypogonadal men:  
a systematic review and network meta-analysis.

For peer review only - <http://bmjopen.bmj.com/site/about/guidelines.xhtml>

**eTable 3: Risk of bias of included randomized controlled trials that reported at least one outcome of interest**

| Author, year         | Adequate sequence generation | Allocation concealment | Blinding of outcome assessment (objective outcomes) | Blinding of outcome assessment (subjective outcomes) | Incomplete outcome data addressed (efficacy outcomes) | Incomplete outcome data addressed (harm outcomes) |
|----------------------|------------------------------|------------------------|-----------------------------------------------------|------------------------------------------------------|-------------------------------------------------------|---------------------------------------------------|
| Dias 2016            | Low                          | Unclear                | Low                                                 | Low                                                  | High                                                  | Unclear                                           |
| Chillarón 2016       | Unclear                      | Low                    | Low                                                 | Unclear                                              | Low                                                   | Low                                               |
| Brock 2016           | Low                          | Low                    | Low                                                 | Low                                                  | Low                                                   | Low                                               |
| Dhindsa 2016         | Unclear                      | Unclear                | Low                                                 | Unclear                                              | High                                                  | Unclear                                           |
| Konaka 2016          | Low                          | Unclear                | Low                                                 | High                                                 | High                                                  | Unclear                                           |
| Magnussen 2016       | Low                          | Low                    | Low                                                 | Low                                                  | Low                                                   | Low                                               |
| Ng Tang Fui 2016     | Low                          | Low                    | Low                                                 | Low                                                  | High                                                  | Unclear                                           |
| Sinclair 2016        | Unclear                      | Low                    | Low                                                 | Low                                                  | High                                                  | High                                              |
| Snyder 2016          | Low                          | Low                    | Low                                                 | Low                                                  | Low                                                   | Low                                               |
| Basaria 2015, p. 570 | Unclear                      | Unclear                | Low                                                 | Low                                                  | High                                                  | Unclear                                           |
| Basaria 2015, p. 280 | Low                          | Unclear                | Low                                                 | Low                                                  | High                                                  | Unclear                                           |
| Cherrier 2015        | Unclear                      | Unclear                | Low                                                 | Unclear                                              | Low                                                   | Low                                               |
| Paduch 2015          | Low                          | Low                    | Low                                                 | Unclear                                              | Low                                                   | Low                                               |
| Gianatti 2014        | Unclear                      | Low                    | Low                                                 | Low                                                  | Low                                                   | Low                                               |
| Borst 2014           | Low                          | Unclear                | Low                                                 | High                                                 | High                                                  | High                                              |
| Hackett 2013         | Unclear                      | Low                    | Low                                                 | Low                                                  | Low                                                   | Low                                               |
| Wang 2013            | Unclear                      | Unclear                | Low                                                 | NA                                                   | Low                                                   | High                                              |
| Behre 2012           | Low                          | Low                    | Low                                                 | Low                                                  | Low                                                   | High                                              |
| Spitzer 2012         | Unclear                      | Low                    | Low                                                 | Low                                                  | Low                                                   | Low                                               |
| Stout 2012           | Unclear                      | Unclear                | NA                                                  | Low                                                  | High                                                  | High                                              |
| Zhang 2012           | Unclear                      | Low                    | Low                                                 | High                                                 | Low                                                   | Low                                               |
| Ho 2011              | Unclear                      | Low                    | Low                                                 | Low                                                  | Low                                                   | Low                                               |
| Jones 2011           | Unclear                      | Unclear                | Low                                                 | Low                                                  | High                                                  | High                                              |
| Kaufman 2011         | Unclear                      | Low                    | Low                                                 | Low                                                  | High                                                  | Low                                               |
| Sheffield-Moore 2011 | Unclear                      | Low                    | Low                                                 | NA                                                   | Low                                                   | High                                              |
| Shigehara 2011       | Unclear                      | Unclear                | Low                                                 | High                                                 | Low                                                   | Low                                               |

Supplemental Online Content: Elliott et al. Testosterone therapy in hypogonadal men: a systematic review and network meta-analysis.

For peer review only - <http://bmjopen.bmj.com/site/about/guidelines.xhtml>

|                              |         |         |         |         |         |         |
|------------------------------|---------|---------|---------|---------|---------|---------|
| <b>Aversa 2010, p. 776</b>   | Unclear | Unclear | Low     | Low     | Unclear | Unclear |
| <b>Aversa 2010, p. 3495</b>  | Unclear | Unclear | Low     | Low     | Low     | Low     |
| <b>Basaria 2010</b>          | Low     | Low     | Low     | Low     | Low     | Unclear |
| <b>Kalinchenko 2010</b>      | Unclear | Low     | Low     | Low     | Low     | Low     |
| <b>Kenny 2010</b>            | Unclear | Low     | Low     | Low     | High    | Unclear |
| <b>Srinivas-Shankar 2010</b> | Low     | Low     | Low     | Low     | Low     | Unclear |
| <b>Caminiti 2009</b>         | Unclear | Low     | Low     | Low     | Low     | Low     |
| <b>Chiang 2009</b>           | Unclear | Unclear | Low     | Low     | High    | High    |
| <b>Emmelot-Vonk 2009</b>     | Low     | Low     | Low     | Low     | Low     | Low     |
| <b>Heufelder 2009</b>        | Low     | Unclear | Low     | High    | Low     | Low     |
| <b>Hohl 2009</b>             | High    | High    | Low     | High    | Low     | Low     |
| <b>Mathur 2009</b>           | Low     | Unclear | Low     | Low     | Low     | High    |
| <b>Morales 2009</b>          | Low     | Low     | Low     | Low     | Low     | Low     |
| <b>Shores 2009</b>           | Low     | Low     | Low     | Low     | High    | Unclear |
| <b>Agledahl 2008</b>         | Unclear | Unclear | Low     | NA      | Low     | Low     |
| <b>Basurto 2008</b>          | Low     | Low     | Low     | Low     | Low     | Unclear |
| <b>Raynaud 2008</b>          | Unclear | Unclear | Low     | High    | High    | High    |
| <b>Svartberg 2008</b>        | Unclear | Unclear | Low     | Low     | Low     | Unclear |
| <b>Chiang 2007</b>           | Unclear | Unclear | Low     | Unclear | High    | Low     |
| <b>Brockenbrough 2006</b>    | Unclear | Low     | Low     | Unclear | High    | Low     |
| <b>Marks 2006</b>            | Unclear | Unclear | Low     | Low     | Low     | Low     |
| <b>Merza 2005</b>            | Unclear | Unclear | Low     | Unclear | Low     | Low     |
| <b>Kuhnert 2005</b>          | Unclear | Low     | Low     | High    | High    | High    |
| <b>Orengo 2005</b>           | Low     | Unclear | Low     | Unclear | High    | High    |
| <b>Amory 2004</b>            | Low     | Low     | Low     | Low     | Unclear | Unclear |
| <b>Cavallini 2004</b>        | Unclear | Unclear | Low     | Unclear | Unclear | High    |
| <b>Schubert 2004</b>         | Low     | Unclear | Low     | High    | Unclear | Low     |
| <b>Shabsigh 2004</b>         | Low     | Unclear | Low     | Low     | Low     | Unclear |
| <b>Boyanov 2003</b>          | Unclear | Unclear | Low     | High    | Low     | Low     |
| <b>McNicholas 2003</b>       | Unclear | Unclear | Low     | High    | High    | High    |
| <b>Steidle 2003</b>          | Unclear | Unclear | Low     | High    | High    | High    |
| <b>Tan 2003</b>              | Unclear | Unclear | Unclear | High    | Low     | Low     |
| <b>Ferrando 2002</b>         | Unclear | Unclear | Low     | NA      | Low     | Low     |
| <b>Kang 2002</b>             | Unclear | Unclear | Low     | NA      | Low     | Low     |
| <b>Simon 2001</b>            | Unclear | Unclear | Low     | Low     | NA      | Low     |
| <b>Bhasin 2000</b>           | Low     | Unclear | Low     | Unclear | Low     | Unclear |
| <b>Wang 2000</b>             | Unclear | Unclear | Low     | High    | High    | High    |

Supplemental Online Content: Elliott et al. Testosterone therapy in hypogonadal men: a systematic review and network meta-analysis.

For peer review only - <http://bmjopen.bmj.com/site/about/guidelines.xhtml>

|                                                                                                                                                                                                         |         |         |     |         |         |         |
|---------------------------------------------------------------------------------------------------------------------------------------------------------------------------------------------------------|---------|---------|-----|---------|---------|---------|
| <b>Clague 1999</b>                                                                                                                                                                                      | Unclear | Unclear | Low | NA      | Low     | Low     |
| <b>Dobs 1999</b>                                                                                                                                                                                        | Unclear | Low     | Low | High    | High    | Unclear |
| <b>Bhasin 1998</b>                                                                                                                                                                                      | Unclear | Unclear | Low | Unclear | High    | Unclear |
| <b>Grinspoon 1998</b>                                                                                                                                                                                   | Low     | Low     | Low | Low     | High    | Unclear |
| <b>Jockenhovel 1997, p. 2510</b>                                                                                                                                                                        | Unclear | Unclear | Low | NA      | Unclear | Unclear |
| <b>Jockenhovel 1997, p. 293</b>                                                                                                                                                                         | Unclear | Unclear | Low | NA      | Low     | Unclear |
| <b>Sih 1997</b>                                                                                                                                                                                         | Low     | Unclear | Low | Unclear | High    | Unclear |
| Note: Risk of bias was not assessed for the studies that reported no outcomes of interest or that did not provide usable data (e.g., cross-over studies without first period data reported separately). |         |         |     |         |         |         |

**eTable 4: SIGN50 assessment of included non-randomized studies that reported at least one outcome of interest.** Overall assessment was based on consideration of all domains of the SIGN50 Methodology checklist for cohort studies.

| Study*                 | Overall assessment† | Comments                                                                                                                                                                                                                                                                                                                                                                                                                                                    |
|------------------------|---------------------|-------------------------------------------------------------------------------------------------------------------------------------------------------------------------------------------------------------------------------------------------------------------------------------------------------------------------------------------------------------------------------------------------------------------------------------------------------------|
| <b>Traish 2017</b>     | Unacceptable (–)    | Prospective cohort. Study “not designed or powered to address the effects of [TRT] on mortality in men with hypogonadism.” Control group comprised men who opted against TRT. Did not adjust for previous CV events, and groups were not balanced at baseline for some factors. Unclear from where participants were recruited and whether outcome assessment was blinded to exposure status. Outcomes assessed for up to 8 years.                          |
| <b>Jung 2016</b>       | Unacceptable (–)    | Prospective cohort. Did not report how study participants were assigned to treatment groups. No adverse events of interest reported (stroke, MI, prostate cancer). Unblinded, with 8 month treatment and follow-up                                                                                                                                                                                                                                          |
| <b>Debruyne 2017</b>   | Acceptable (+)      | Prospective cohort (RHYME registry). Multinational registry of treated or untreated newly diagnosed hypogonadal men. Follow-up on 93% of cohort over 3-yr period. Included a wide age range and multiple comorbidities but groups not well balanced across all baseline characteristics. Men with a history of prostate cancer were excluded. Outcome assessment blinded to exposure status.                                                                |
| <b>Layton 2015</b>     | Acceptable (+)      | Retrospective cohort. Comparative safety of TRT products grouped by route of administration (no comparison to non-users). Data unavailable for some patient characteristics. Study included a “large diverse patient sample representing men across age groups, populations, treatment and practice patterns, and health care systems.” Unclear whether outcome assessment was blinded to exposure status. Mean treatment duration between 96 and 122 days. |
| <b>Cheetham 2017</b>   | Acceptable (+)      | Retrospective cohort. Cohort entry determined by dispensation of a TRT product. Over 50% of cohort prescribed an intramuscular TRT. Possible confounding by indication, analysis could not adjust for all CV risk factors, and dose and duration of TRT were not considered. Unclear whether outcome assessment was blinded to exposure status. Length of follow up about 1 year longer for no TRT group.                                                   |
| <b>Yassin 2017</b>     | Unacceptable (–)    | Prospective registry. Investigation and biopsy frequency equal in both groups. Outcome assessment not blinded to exposure status. Percentage of cohort for whom data were available not reported. Confounding not considered.                                                                                                                                                                                                                               |
| <b>Pastuszak 2015</b>  | Unacceptable (–)    | Retrospective cohort. Considerable variation in baseline characteristics between groups, and confounding not considered. Outcome assessment not blinded to exposure status. 36 month follow-up.                                                                                                                                                                                                                                                             |
| <b>Ramasay 2015</b>    | Unacceptable (–)    | Retrospective cohort. “All major adverse cardiovascular events were verified by telephone with the patient (or family members if patient died).” Authors did not provide clear description and measurement about the outcomes. Median follow-up 3.8 (TRT) or 3.4 (no TRT) yr<br>Confounding not considered, and outcome assessment not blinded to exposure status.                                                                                          |
| <b>Francomano 2014</b> | Unacceptable (–)    | Prospective cohort. Obese men with low testosterone. Baseline characteristics were well matched on reported characteristics, but control group had contraindications to TRT. 33% dropout in treatment group, zero in control group;                                                                                                                                                                                                                         |

Supplemental Online Content: Elliott et al. Testosterone therapy in hypogonadal men: a systematic review and network meta-analysis.

For peer review only - <http://bmjopen.bmj.com/site/about/guidelines.xhtml>



|                                                                                                                                                                                                                                                                                                                                                                                                                                                                                                                                                                                                              |                  |                                                                                                                                                                                                                                                                                                                                                                                                               |
|--------------------------------------------------------------------------------------------------------------------------------------------------------------------------------------------------------------------------------------------------------------------------------------------------------------------------------------------------------------------------------------------------------------------------------------------------------------------------------------------------------------------------------------------------------------------------------------------------------------|------------------|---------------------------------------------------------------------------------------------------------------------------------------------------------------------------------------------------------------------------------------------------------------------------------------------------------------------------------------------------------------------------------------------------------------|
|                                                                                                                                                                                                                                                                                                                                                                                                                                                                                                                                                                                                              |                  | no comparison between those who dropped out or remained in study.                                                                                                                                                                                                                                                                                                                                             |
| <b>Aydogdu 2013</b>                                                                                                                                                                                                                                                                                                                                                                                                                                                                                                                                                                                          | Acceptable (+)   | Retrospective cohort. Men with IHH. SAE not defined as an outcome but reported that no SAEs were detected for any treatment group.                                                                                                                                                                                                                                                                            |
| <b>Blick 2013</b>                                                                                                                                                                                                                                                                                                                                                                                                                                                                                                                                                                                            | Acceptable (+)   | Prospective cohort. Groups were generally well matched on baseline characteristics with no statistically significant differences (except for study site). Patients in the 2 treatment groups were not followed for an equal length of time (AndroGel: mean 6.1 yr; Testim: mean 1.9 yr). Skin reactions assessed but not reported. Outcome assessment was not blinded to exposure status.                     |
| <b>Vigen 2013</b>                                                                                                                                                                                                                                                                                                                                                                                                                                                                                                                                                                                            | Acceptable (+)   | Retrospective cohort. All-cause mortality assessed via the Veterans Affairs vital status file. Myocardial infarction and ischemic stroke assessed via ICD-9 codes from Veterans Affairs inpatient treatment files. Conclusions based on a composite outcome. Sufficient data not reported to allow analysis of stroke or MI separately at each time point. Outcome assessment not blinded to exposure status. |
| <b>Aversa 2012</b>                                                                                                                                                                                                                                                                                                                                                                                                                                                                                                                                                                                           | Unacceptable (–) | Prospective cohort. Men with multiple sclerosis and late onset hypogonadism. Baseline characteristics were well matched but the control group comprised of men who had refused or had contraindications to testosterone. Adherence to treatment over 3 years was 50% in TU group. Those discontinuing TU but remaining in study for follow up were not included in efficacy analysis.                         |
| <b>Shores 2012</b>                                                                                                                                                                                                                                                                                                                                                                                                                                                                                                                                                                                           | Acceptable (+)   | Retrospective cohort. Hazard ratio for mortality takes person-years of observation into account. Adjusted HR and CIs provided (adjusted for age, site, hospitalization in the past year, diabetes, coronary artery disease). Outcome assessment not blinded to exposure status. Exposure determined via Veterans Affairs pharmacy records and outcomes ascertained from 2 mortality databases.                |
| <b>Rhoden 2006</b>                                                                                                                                                                                                                                                                                                                                                                                                                                                                                                                                                                                           | Acceptable (+)   | Retrospective cohort. Patients had to have negative prostate biopsy before initiation of TRT, thus excluding any men with pre-existing large volume disease. Type and dose of IM testosterone not reported. Dose of gel not reported (data NR by type). Outcome assessment not blinded to exposure status.                                                                                                    |
| <b>Dean 2005</b>                                                                                                                                                                                                                                                                                                                                                                                                                                                                                                                                                                                             | Unacceptable (–) | Prospective cohort. Poor reporting of the number of patients in each group and which group the safety events occurred in. Number of and reasons for withdrawals not reported. Safety data reported overall but not by treatment group. Outcome assessment not blinded to exposure status.                                                                                                                     |
| <b>Wang 2004</b>                                                                                                                                                                                                                                                                                                                                                                                                                                                                                                                                                                                             | Unacceptable (–) | Prospective cohort (open-label extension of an RCT). The number of men assigned to each group NR. Safety data poorly reported: 3 cases of prostate cancer reported but number of people in each group not reported. Outcome assessment not blinded to exposure status.                                                                                                                                        |
| <b>Guay 2000</b>                                                                                                                                                                                                                                                                                                                                                                                                                                                                                                                                                                                             | Unacceptable (–) | Retrospective cohort. Safety data not reported by treatment group. Outcome assessment not blinded to exposure status.                                                                                                                                                                                                                                                                                         |
| <b>Hajjar 1997</b>                                                                                                                                                                                                                                                                                                                                                                                                                                                                                                                                                                                           | Unacceptable (–) | Retrospective cohort. Data not clearly provided. Safety outcomes were reported based on a subset of people assigned to each group, and it is not clear why the other patients were omitted. Outcome assessment not blinded to exposure status.                                                                                                                                                                |
| <p>Note: CI = confidence interval, ICD = International Classification of Diseases, Ninth Revision, IHH = idiopathic hypogonadotropic hypogonadism, HR = hazard ratio, MI = myocardial infarction, NR = not reported, RCT = randomized controlled trial, SAE = serious adverse events, TRT = testosterone replacement therapy, TU = testosterone undecanoate.</p> <p>*Non-randomized studies that reported at least 1 outcome of interest.</p> <p>†Assessed by use of SIGN50 for cohort studies (<a href="http://www.sign.ac.uk/checklists-and-notes.html">www.sign.ac.uk/checklists-and-notes.html</a>).</p> |                  |                                                                                                                                                                                                                                                                                                                                                                                                               |

Supplemental Online Content: Elliott et al. Testosterone therapy in hypogonadal men: a systematic review and network meta-analysis.

For peer review only - <http://bmjopen.bmj.com/site/about/guidelines.xhtml>

**eAppendix 5: Funnel plots for assessment of publication bias**

**A) Quality of life**

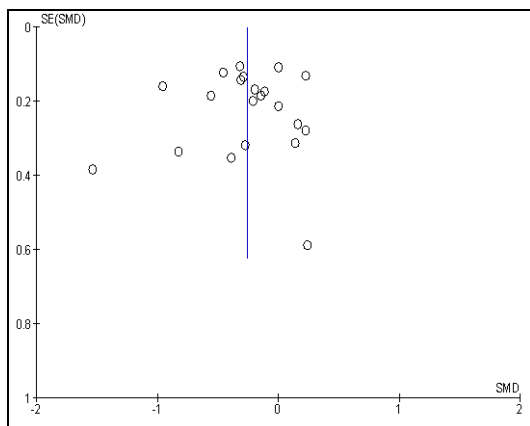

**B) Depression**

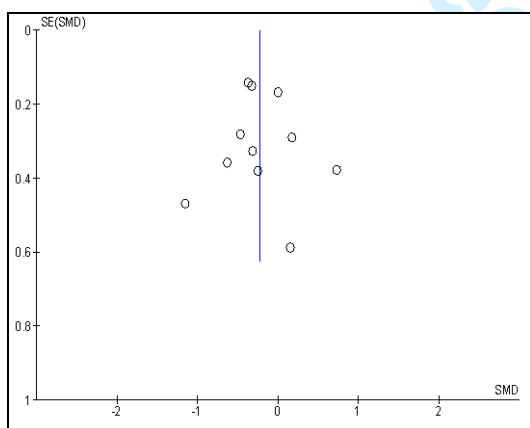

**C) Libido**

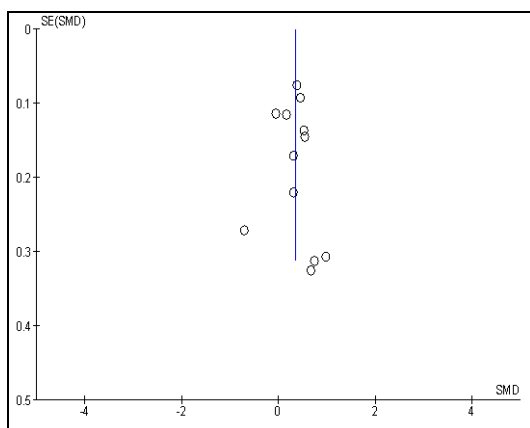

peer review only

1  
2  
3  
4  
5  
6  
7  
8  
9  
10  
11  
12  
13  
14  
15  
16  
17  
18  
19  
20  
21  
22  
23  
24  
25  
26  
27  
28  
29  
30  
31  
32  
33  
34  
35  
36  
37  
38  
39  
40  
41  
42  
43  
44  
45  
46  
47  
48  
49  
50  
51  
52  
53  
54  
55  
56  
57  
58  
59  
60

D) Erectile function

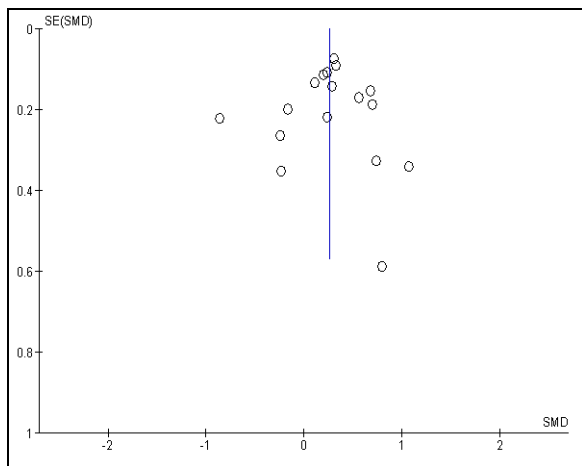

E) Cardiovascular death

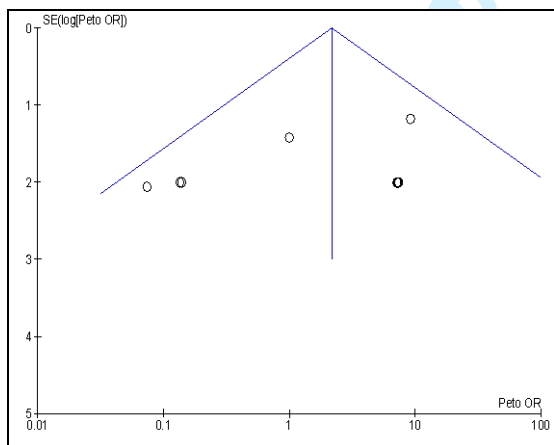

F) Myocardial infarction

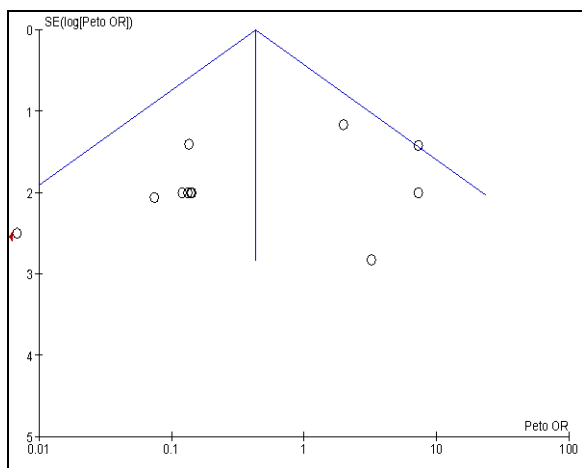

peer review only

1  
2  
3  
4  
5  
6  
7  
8  
9  
10  
11  
12  
13  
14  
15  
16  
17  
18  
19  
20  
21  
22  
23  
24  
25  
26  
27  
28  
29  
30  
31  
32  
33  
34  
35  
36  
37  
38  
39  
40  
41  
42  
43  
44  
45  
46  
47  
48  
49  
50  
51  
52  
53  
54  
55  
56  
57  
58  
59  
60

**G) Prostate cancer**

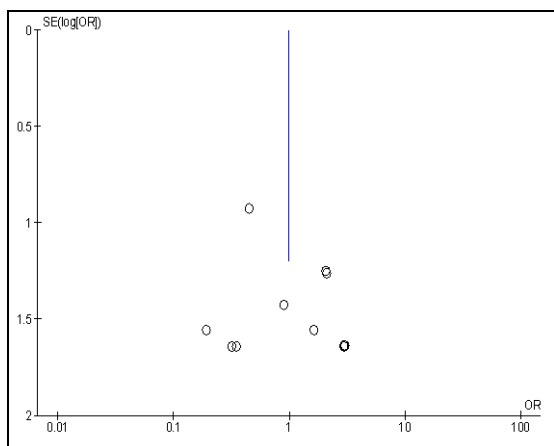

**H) Serious adverse events**

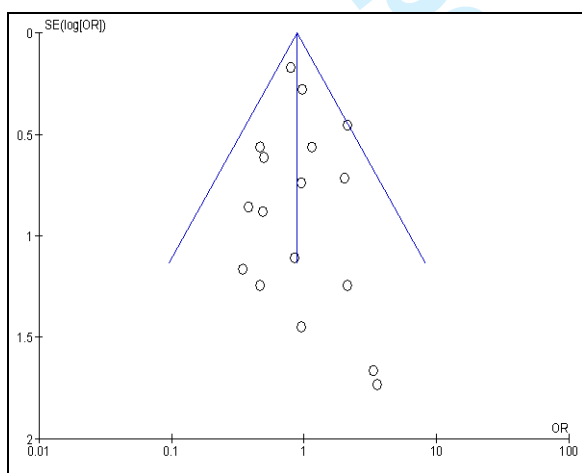

**I) Withdrawals due to adverse events**

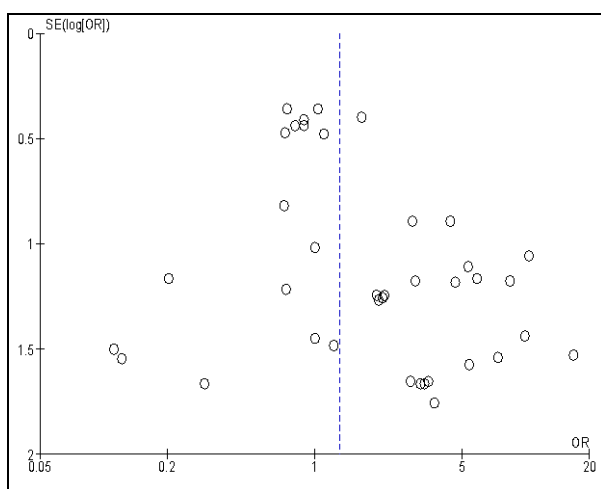

## eAppendix 6: Evaluation of network consistency

We evaluated the consistency of networks with closed loops. To be classified as a “closed loop,” at least 2 nodes had to be connected by more than one trial (e.g., not connected solely by a multi-arm trial).

To evaluate the consistency of networks with closed loops, two analyses were performed. One was conducted using the standard consistency model, which assumes that the data in the network are consistent. A second analysis was performed using an inconsistency model, which assumes that the data in the network are not consistent. The posterior mean deviance of the individual data points derived from the inconsistency model was plotted against the posterior mean deviance derived from the consistency model. If inconsistency is present, data points will lie under the diagonal line, indicating deviation from the consistency model. Data points above the diagonal line indicate deviation from the inconsistency model and are not indicative of inconsistency.

Model fit was also evaluated by considering the residual deviance and deviance information criterion (DIC) of the inconsistency and consistency models, with the model that has the lower residual deviance and DIC representing the better fit for the data. For each network, the consistency model had a lower residual deviance and DIC for each outcome, representing better model fit.

### LIBIDO: BASE CASE (ALL STUDIES)

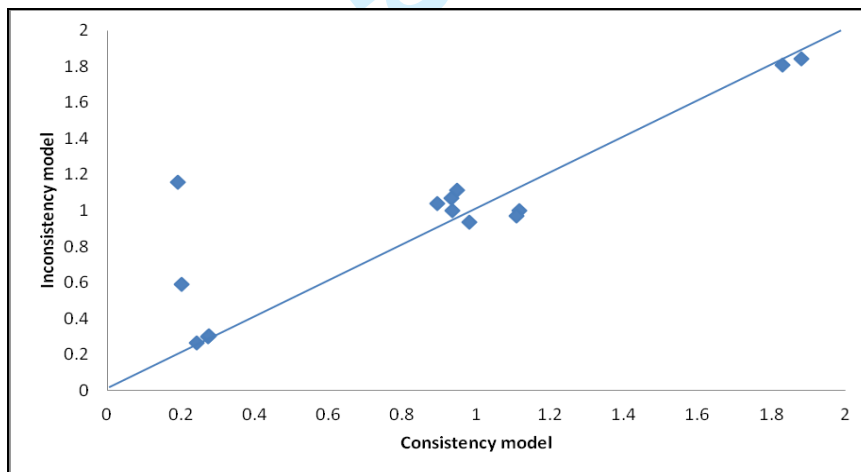

### TOTAL TESTOSTERONE LEVEL, 3 MO

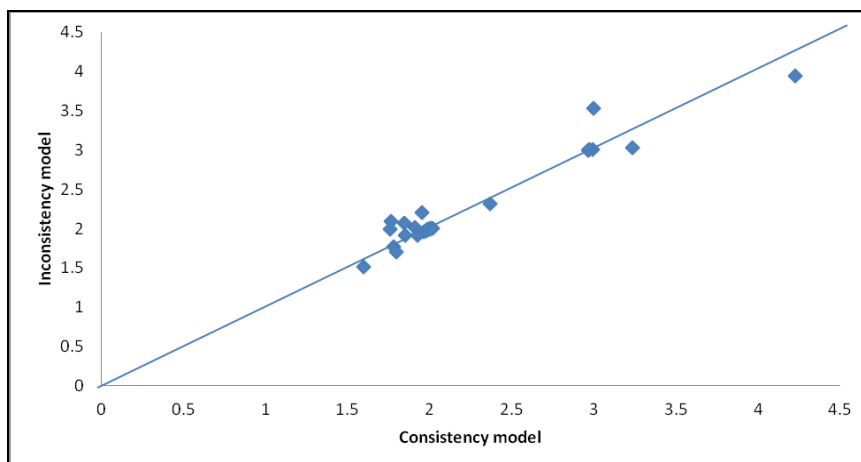

Supplemental Online Content: Elliott et al. Testosterone therapy in hypogonadal men: a systematic review and network meta-analysis.

For peer review only - <http://bmjopen.bmj.com/site/about/guidelines.xhtml>

1  
2  
3  
4  
5  
6 **TOTAL TESTOSTERONE LEVEL, 6 MO**  
7

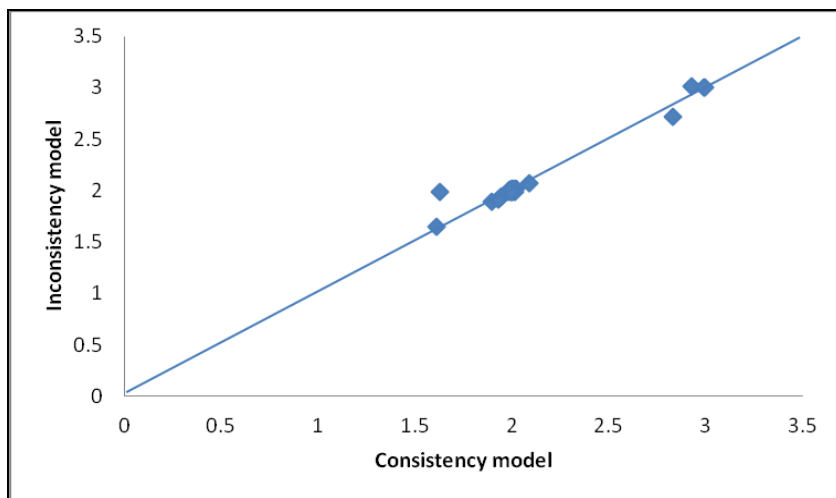

24  
25  
26 **TOTAL TESTOSTERONE LEVEL, END OF STUDY**  
27

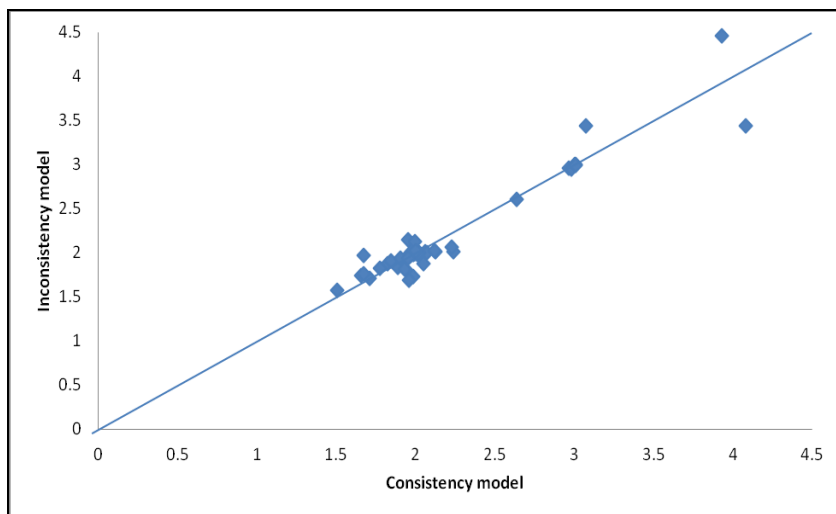

Supplemental Online Content: Elliott et al. Testosterone therapy in hypogonadal men: a systematic review and network meta-analysis.

For peer review only - <http://bmjopen.bmj.com/site/about/guidelines.xhtml>

## eAppendix 7: Evidence networks

## Summary of network characteristics

| Outcome                          | No. of trials | No. of treatments* | No. of comparisons† | No. of participants | Treatment duration |
|----------------------------------|---------------|--------------------|---------------------|---------------------|--------------------|
| Quality of life                  | 23            | 14                 | 27                  | 3090                | 12 wk to 3 yr      |
| Depression                       | 12            | 9                  | 12                  | 852                 | 12 wk to 3 yr      |
| Libido                           | 14            | 10                 | 23                  | 3167                | 12 wk to 3 yr      |
| Erectile function                | 17            | 9                  | 19                  | 3165                | 12 wk to 3 yr      |
| Total testosterone, 3 mo         | 26            | 15                 | 39                  | 2739                | NA                 |
| Total testosterone, 6 mo         | 23            | 18                 | 29                  | 2908                | NA                 |
| Total testosterone, end of study | 57            | 28                 | 74                  | 5538                | 12 wk to 3 yr      |
| Serious AEs                      | 15            | 7                  | 15                  | 1860                | 12 to 3 yr         |
| Withdrawals due to AEs           | 27            | 16                 | 29                  | 4165                | 12 wk to 3 yr      |

Note: AE = adverse event.  
 \*In addition to placebo  
 †Direct comparisons based on the number of 2-, 3-, and 4-arm trials.

## eFigure 1A) Depression

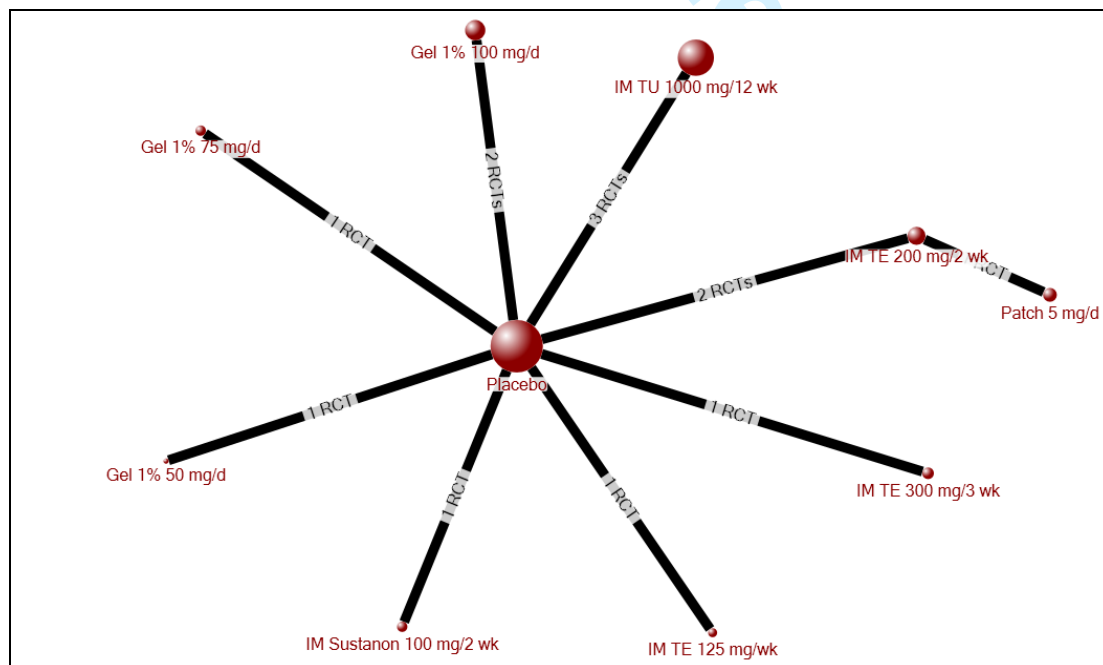

Supplemental Online Content: Elliott et al. Testosterone therapy in hypogonadal men: a systematic review and network meta-analysis.

For peer review only - <http://bmjopen.bmj.com/site/about/guidelines.xhtml>

**B) Libido**

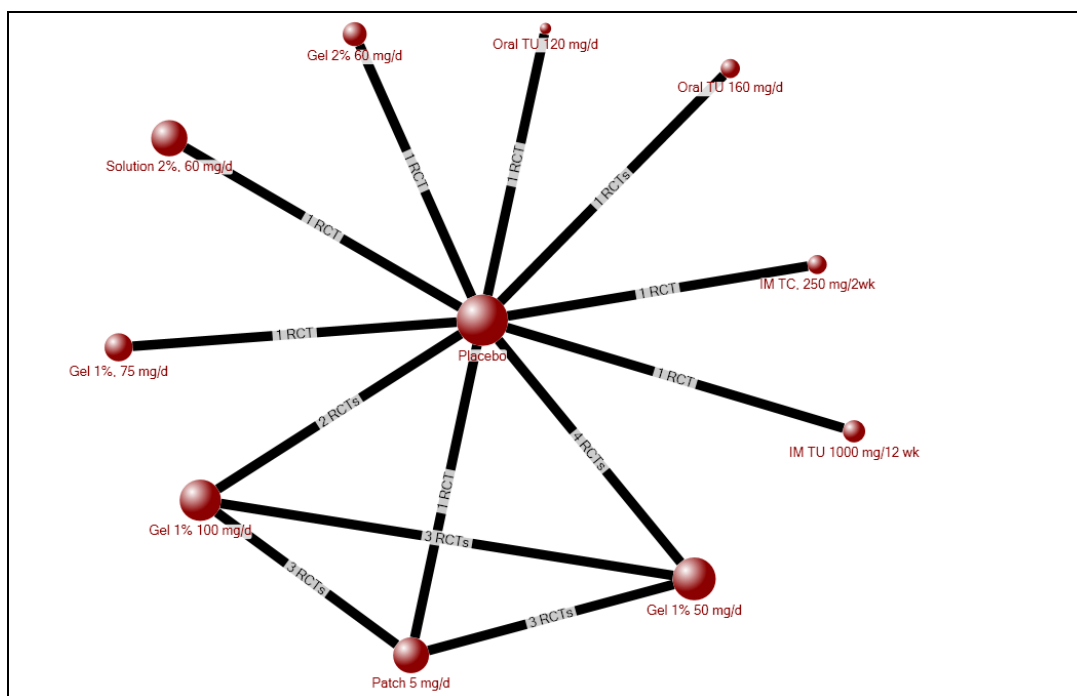

**C) Erectile function**

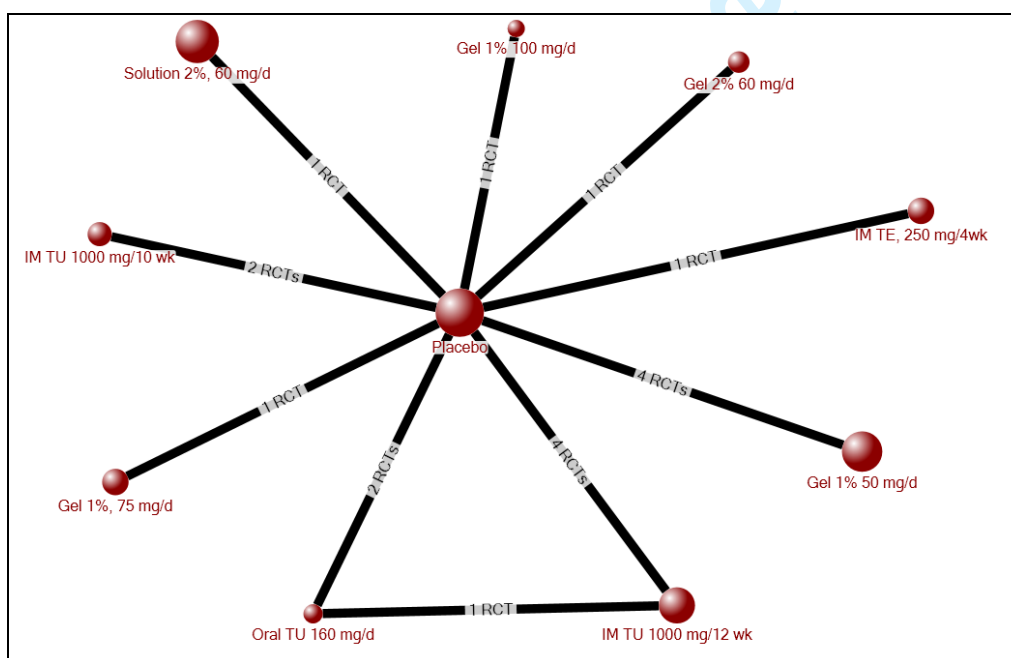

Supplemental Online Content: Elliott et al. Testosterone therapy in hypogonadal men: a systematic review and network meta-analysis.

For peer review only - <http://bmjopen.bmj.com/site/about/guidelines.xhtml>

1  
2  
3  
4  
5  
6  
7  
8  
9  
10  
11  
12  
13  
14  
15  
16  
17  
18  
19  
20  
21  
22  
23  
24  
25  
26  
27  
28  
29  
30  
31  
32  
33  
34  
35  
36  
37  
38  
39  
40  
41  
42  
43  
44  
45  
46  
47  
48  
49  
50  
51  
52  
53  
54  
55  
56  
57  
58  
59  
60



D) Serious adverse events

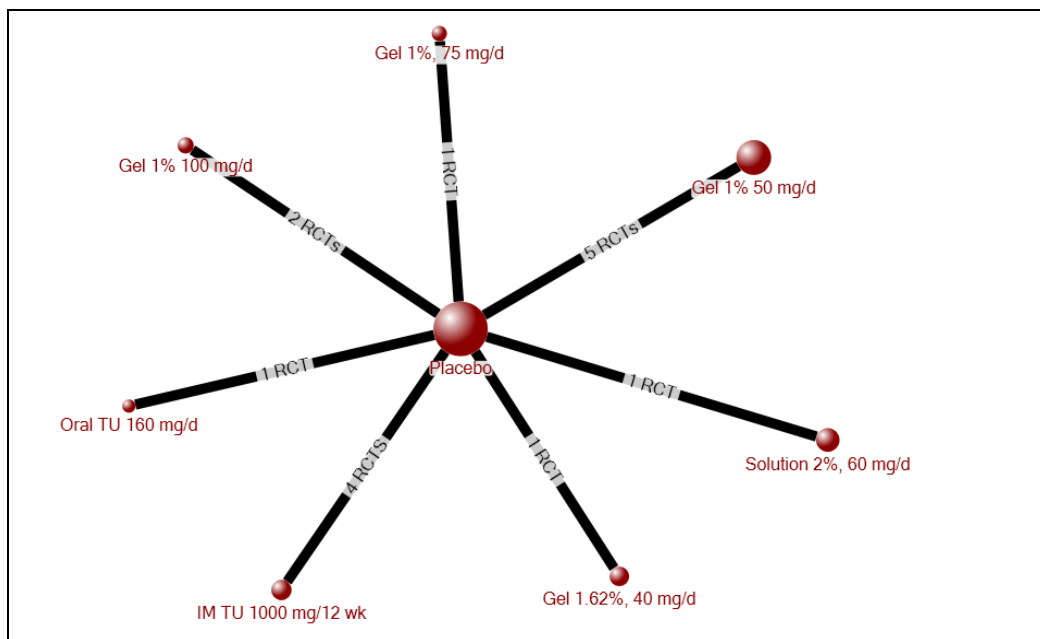

E) Withdrawals due to adverse events

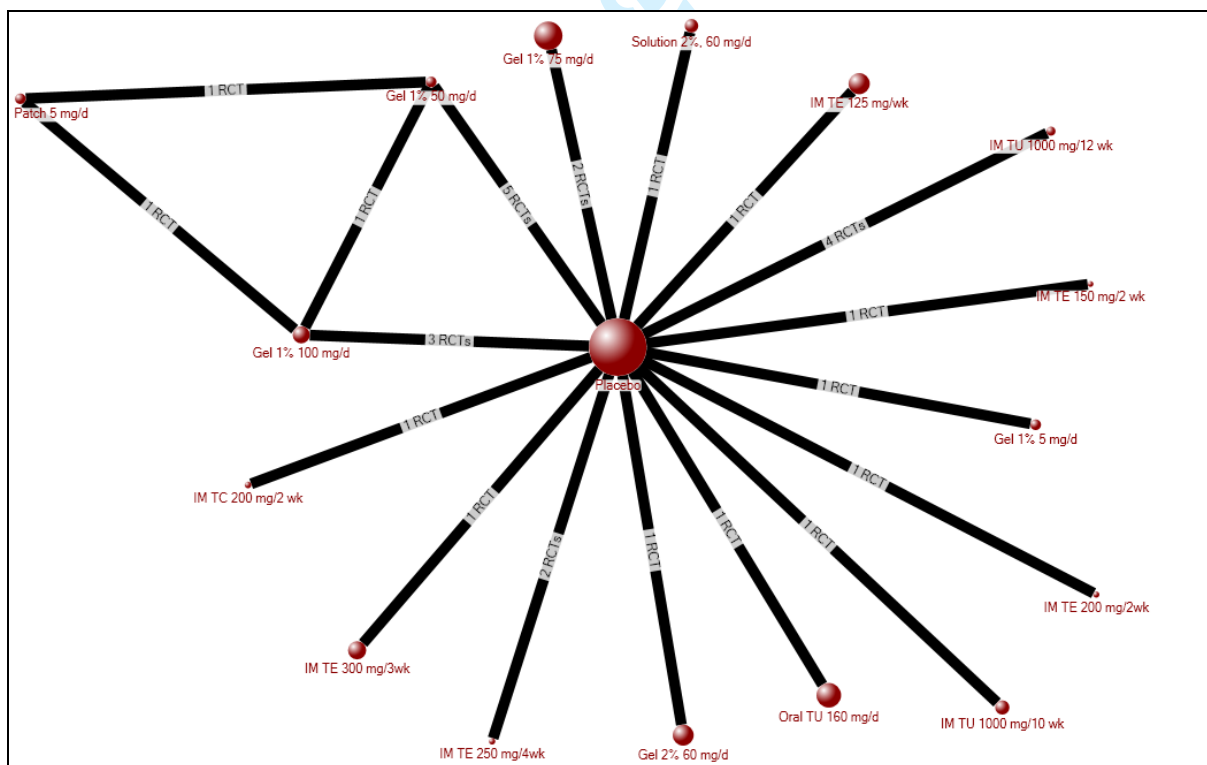

Supplemental Online Content: Elliott et al. Testosterone therapy in hypogonadal men: a systematic review and network meta-analysis.

For peer review only - <http://bmjopen.bmj.com/site/about/guidelines.xhtml>

eAppendix 8: Pair-wise meta-analyses and network meta-analyses

eFigure2: Individual trial results, depression

A) All trials

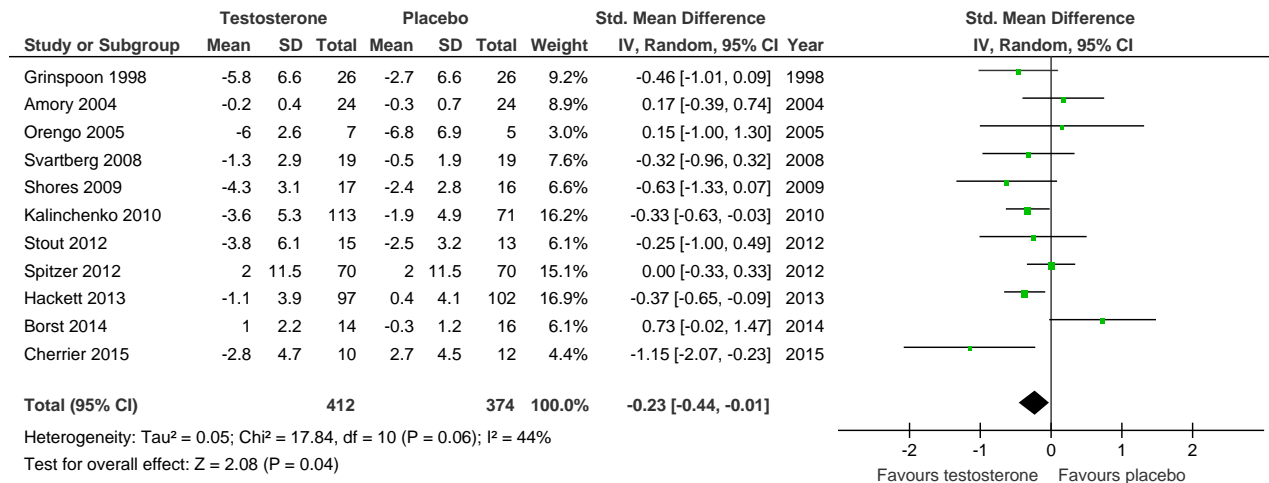

B) Trials involving men without major comorbidities

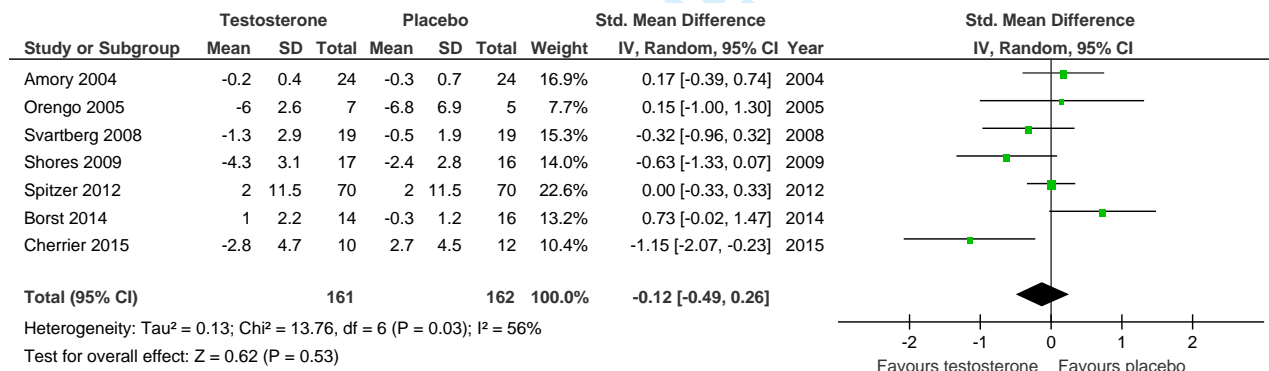

eTable 5: Depression – Bayesian network meta-analysis\*

| Treatment                    | Standardized mean difference (95% confidence interval) |                       |                       |                      |                       |                            |                         |                           |                           |                                 |
|------------------------------|--------------------------------------------------------|-----------------------|-----------------------|----------------------|-----------------------|----------------------------|-------------------------|---------------------------|---------------------------|---------------------------------|
|                              | Placebo                                                | Patch,<br>5 mg/d      | Gel 1%,<br>50 mg/d    | Gel 1%,<br>75 mg/d   | Gel 1%,<br>100 mg/d   | IM TU,<br>1000 mg/12<br>wk | IM TE,<br>125 mg/<br>wk | IM TE,<br>200 mg/<br>3 wk | IM TE,<br>300 mg/<br>3 wk | IM Sustanon,<br>100 mg/<br>2 wk |
| Patch,<br>5 mg/d             | -0.10<br>(-2.43,2.32)                                  | —                     |                       |                      |                       |                            |                         |                           |                           |                                 |
| Gel 1%,<br>50 mg/d           | 0.17<br>(-1.72,2.00)                                   | 0.27<br>(-2.76,3.22)  | —                     |                      |                       |                            |                         |                           |                           |                                 |
| Gel 1%,<br>75 mg/d           | -0.63<br>(-2.35,1.10)                                  | -0.54<br>(-3.46,2.37) | -0.80<br>(-3.33,1.74) | —                    |                       |                            |                         |                           |                           |                                 |
| Gel 1%,<br>100 mg/d          | -0.38<br>(-1.71,0.65)                                  | -0.28<br>(-3.12,2.20) | -0.55<br>(-2.87,1.55) | 0.25<br>(-2.00,2.18) | —                     |                            |                         |                           |                           |                                 |
| IM TU, 1000<br>mg/12 wk      | -0.34<br>(-1.29,0.61)                                  | -0.24<br>(-2.82,2.31) | -0.51<br>(-2.55,1.59) | 0.29<br>(-1.67,2.22) | 0.04<br>(-1.32,1.72)  | —                          |                         |                           |                           |                                 |
| IM TE 125<br>mg/wk           | 0.69<br>(-1.02,2.42)                                   | 0.79<br>(-2.12,3.67)  | 0.52<br>(-1.97,3.10)  | 1.32<br>(-1.12,3.76) | 1.07<br>(-0.87,3.31)  | 1.03<br>(-0.94,3.00)       | —                       |                           |                           |                                 |
| IM TE,<br>200 mg/2 wk        | 0.18<br>(-1.47,1.91)                                   | 0.28<br>(-1.38,1.92)  | 0.01<br>(-2.42,2.56)  | 0.82<br>(-1.58,3.20) | 0.56<br>(-1.32,2.81)  | 0.53<br>(-1.38,2.51)       | -0.51<br>(-2.88,1.91)   | —                         |                           |                                 |
| IM TE,<br>300 mg/3 wk        | -0.46<br>(-2.13,1.22)                                  | -0.36<br>(-3.26,2.50) | -0.63<br>(-3.10,1.89) | 0.17<br>(-2.22,2.53) | -0.08<br>(-1.95,2.12) | -0.12<br>(-2.05,1.81)      | -1.15<br>(-3.54,1.29)   | -0.64<br>(-3.02,1.67)     | —                         |                                 |
| IM Sustanon,<br>100 mg/2 wk† | -0.25<br>(-1.98,1.43)                                  | -0.15<br>(-3.09,2.72) | -0.42<br>(-2.93,2.11) | 0.38<br>(-2.11,2.79) | 0.13<br>(-1.84,2.33)  | 0.09<br>(-1.92,2.06)       | -0.94<br>(-3.39,1.45)   | -0.44<br>(-2.87,1.92)     | 0.21<br>(-2.23,2.58)      | —                               |

Note: IM = intramuscular, TE = testosterone enanthate, TU = testosterone undecanoate.  
 \*Random effects model. Analysis based on change from baseline. A negative SMD indicates improvement in depression. Significant changes are indicated by use of bold and colour (green indicates that the row treatment is significantly better than the column treatment, while red indicates that the row treatment is significantly worse than the column treatment). White indicates no significant difference between treatments.  
 †Blend of testosterone propionate, testosterone phenylpropionate, testosterone isocaproate, and testosterone decanoate.

Supplemental Online Content: Elliott et al. Testosterone therapy in hypogonadal men:  
 a systematic review and network meta-analysis.

For peer review only - <http://bmjopen.bmj.com/site/about/guidelines.xhtml>

eFigure3: Individual trial results, libido

A) All trials

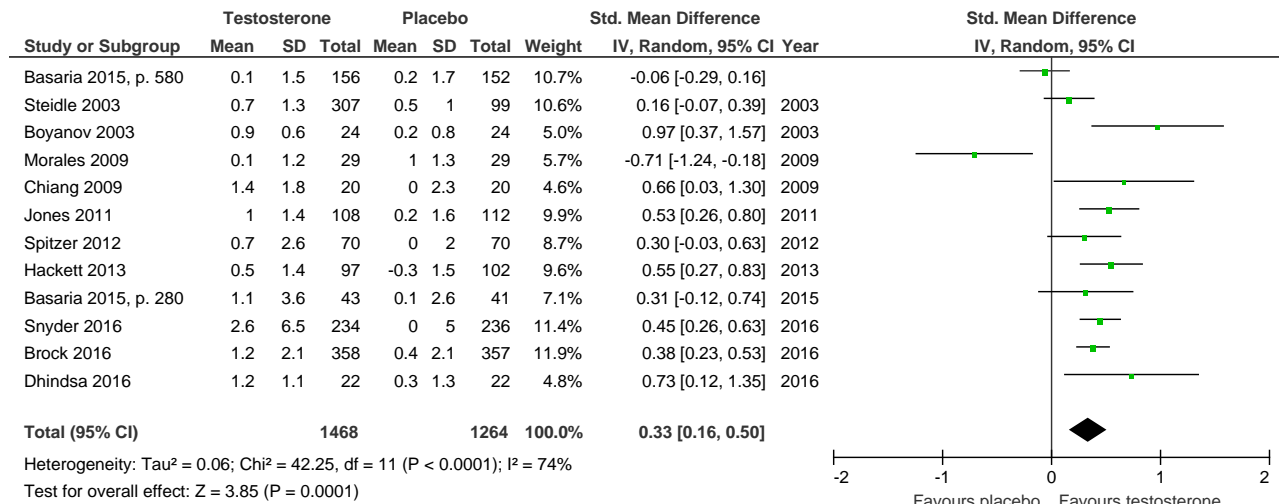

B) Trials involving men with no major comorbidities

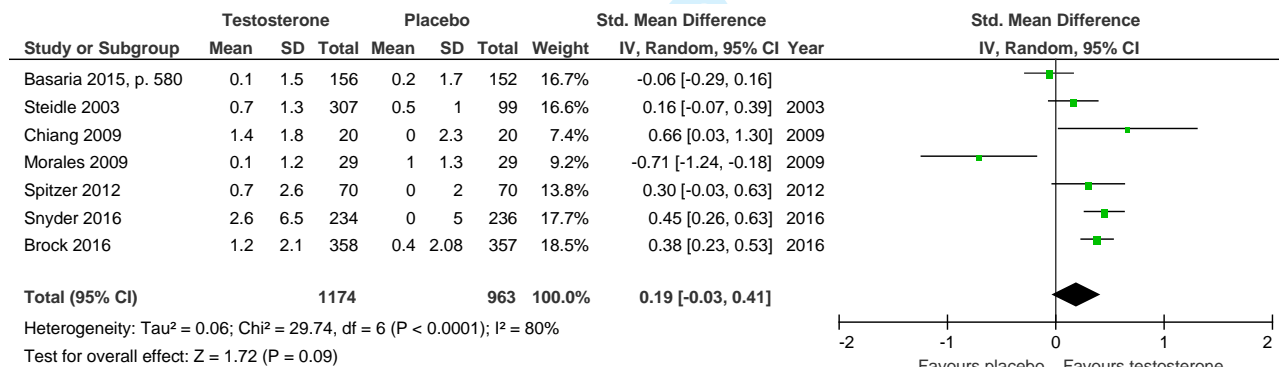

eTable6: Libido – Bayesian network meta-analysis\*

|                         | Standardized mean difference (95% confidence interval) |                                      |                                      |                                   |                                     |                                      |                                      |                                      |                                   |                             |                      |
|-------------------------|--------------------------------------------------------|--------------------------------------|--------------------------------------|-----------------------------------|-------------------------------------|--------------------------------------|--------------------------------------|--------------------------------------|-----------------------------------|-----------------------------|----------------------|
|                         | Placebo                                                | Patch,<br>5 mg/d                     | Gel 1%,<br>50 mg/d                   | Gel 1%,<br>75 mg/d                | Gel 1%,<br>100 mg/d                 | Gel 2%,<br>60 mg/d                   | Solution<br>2%,<br>60 mg/d           | Oral TU,<br>120 mg/d                 | Oral, TU<br>160 mg/d              | IM TU,<br>1000 mg/<br>12 wk | IM TC, 250<br>mg/2wk |
| Patch,<br>5 mg/d        | 0.17<br>(-0.13,0.46)                                   | —                                    |                                      |                                   |                                     |                                      |                                      |                                      |                                   |                             |                      |
| Gel 1%,<br>50 mg/d      | <b>0.32</b><br><b>(0.10,0.55)</b>                      | 0.15<br>(-0.10,0.42)                 | —                                    |                                   |                                     |                                      |                                      |                                      |                                   |                             |                      |
| Gel 1%,<br>75 mg/d      | -0.06<br>(-0.49,0.36)                                  | -0.23<br>(-0.75,0.29)                | -0.38<br>(-0.87,0.10)                | —                                 |                                     |                                      |                                      |                                      |                                   |                             |                      |
| Gel 1%,<br>100 mg/d     | <b>0.43</b><br><b>(0.16,0.69)</b>                      | <b>0.26</b><br><b>(0.00,0.52)</b>    | 0.11<br>(-0.14,0.35)                 | 0.49<br>(-0.01,0.99)              | —                                   |                                      |                                      |                                      |                                   |                             |                      |
| Gel 2%,<br>60 mg/d      | <b>0.54</b><br><b>(0.09,0.99)</b>                      | 0.37<br>(-0.17,0.91)                 | 0.21<br>(-0.29,0.72)                 | 0.60<br>(-0.01,1.22)              | 0.11<br>(-0.41,0.63)                | —                                    |                                      |                                      |                                   |                             |                      |
| Solution 2%,<br>60 mg/d | 0.39<br>(-0.01,0.79)                                   | 0.22<br>(-0.28,0.72)                 | 0.07<br>(-0.39,0.53)                 | 0.45<br>(-0.12,1.04)              | -0.04<br>(-0.52,0.44)               | -0.15<br>(-0.75,0.46)                | —                                    |                                      |                                   |                             |                      |
| Oral TU,<br>120 mg/d    | <b>1.00</b><br><b>(0.31,1.68)</b>                      | <b>0.83</b><br><b>(0.08,1.58)</b>    | 0.68<br>(-0.05,1.39)                 | <b>1.06</b><br><b>(0.25,1.87)</b> | 0.57<br>(-0.17,1.30)                | 0.46<br>(-0.36,1.28)                 | 0.61<br>(-0.18,1.39)                 | —                                    |                                   |                             |                      |
| Oral TU,<br>160 mg/d    | <b>-0.72</b><br><b>(-1.35,-0.10)</b>                   | <b>-0.89</b><br><b>(-1.58,-0.19)</b> | <b>-1.04</b><br><b>(-1.70,-0.38)</b> | -0.66<br>(-1.41,0.10)             | <b>-1.15</b><br><b>(-1.83,0.47)</b> | <b>-1.26</b><br><b>(-2.01,-0.49)</b> | <b>-1.11</b><br><b>(-1.84,-0.37)</b> | <b>-1.72</b><br><b>(-2.66,-0.78)</b> | —                                 |                             |                      |
| IM TU, 1000<br>mg/12 wk | <b>0.57</b><br><b>(0.11,1.03)</b>                      | 0.40<br>(-0.14,0.95)                 | 0.25<br>(-0.26,0.76)                 | <b>0.63</b><br><b>(0.00,1.26)</b> | 0.14<br>(-0.38,0.67)                | 0.03<br>(-0.61,0.68)                 | 0.18<br>(-0.42,0.79)                 | -0.43<br>(-1.25,0.41)                | <b>1.29</b><br><b>(0.52,2.07)</b> | —                           |                      |
| IM TC, 250<br>mg/2wk    | <b>0.71</b><br><b>(0.01,1.41)</b>                      | 0.55<br>(-0.21,1.30)                 | 0.39<br>(-0.34,1.12)                 | 0.78<br>(-0.05,1.59)              | 0.29<br>(-0.46,1.04)                | 0.18<br>(-0.65,0.99)                 | 0.33<br>(-0.47,1.13)                 | -0.28<br>(-1.25,0.72)                | <b>1.44</b><br><b>(0.49,2.37)</b> | 0.14<br>(-0.70,0.97)        | —                    |

Note: IM = intramuscular injection, TC = testosterone cypionate, TU = testosterone undecanoate.  
 \*Random effects model. Analysis based on change from baseline. A positive SMD indicates improvement in libido. Significant changes are indicated by use of bold and colour (green indicates that the row treatment is significantly better than the column treatment, while red indicates that the row treatment is significantly worse than the column treatment). White indicates no significant difference between treatments.

Supplemental Online Content: Elliott et al. Testosterone therapy in hypogonadal men:  
 a systematic review and network meta-analysis.

For peer review only - <http://bmjopen.bmj.com/site/about/guidelines.xhtml>

eFigure4: Individual trial results, erectile function

A) All trials

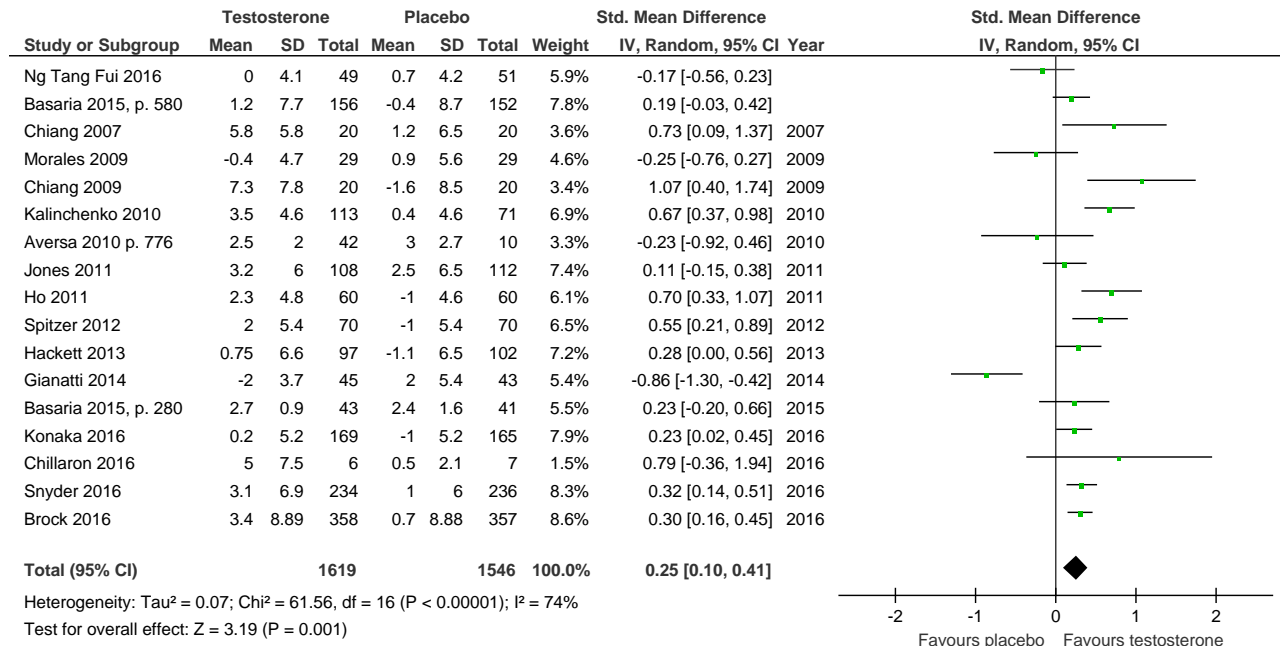

B) Trials involving men without major comorbidities

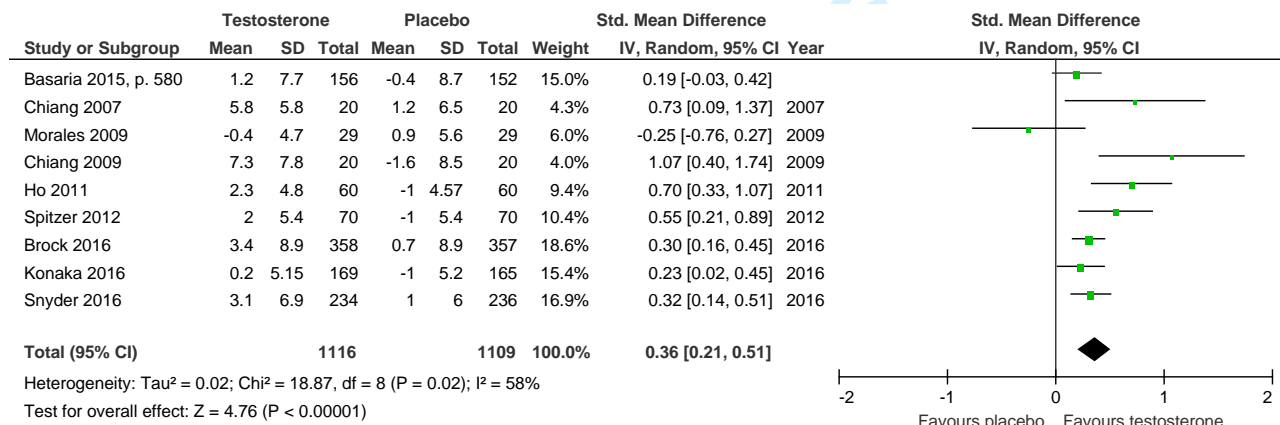

eTable7: Erectile function at end of treatment – Bayesian network meta-analysis\*

|                                  | Standardized mean difference (95% confidence interval) |                       |                       |                       |                       |                         |                      |                            |                            |                     |
|----------------------------------|--------------------------------------------------------|-----------------------|-----------------------|-----------------------|-----------------------|-------------------------|----------------------|----------------------------|----------------------------|---------------------|
|                                  | Placebo                                                | Gel 1%,<br>50 mg/d    | Gel 1%,<br>75 mg/d    | Gel 1%,<br>100 mg/d   | Gel 2%,<br>60 mg/d    | Solution 2%,<br>60 mg/d | Oral, TU<br>160 mg/d | IM TU,<br>1000 mg/10<br>wk | IM TU,<br>1000 mg/12<br>wk | IM TE 250<br>mg/4wk |
| <b>Gel 1%,<br/>50 mg/d</b>       | 0.65<br>(-0.11,1.42)                                   | —                     |                       |                       |                       |                         |                      |                            |                            |                     |
| <b>Gel 1%,<br/>75 mg/d</b>       | 0.26<br>(-0.60,1.11)                                   | -0.39<br>(-1.55,0.76) | —                     |                       |                       |                         |                      |                            |                            |                     |
| <b>Gel 1%, 100<br/>mg/d</b>      | 0.55<br>(-0.70,1.80)                                   | -0.10<br>(-1.57,1.35) | 0.29<br>(-1.23,1.82)  | —                     |                       |                         |                      |                            |                            |                     |
| <b>Gel 2%, 60<br/>mg/d</b>       | 0.11<br>(-1.11,1.33)                                   | -0.54<br>(-1.99,0.90) | -0.15<br>(-1.66,1.34) | -0.44<br>(-2.18,1.31) | —                     |                         |                      |                            |                            |                     |
| <b>Solution 2%,<br/>60 mg/d</b>  | 0.30<br>(-0.90,1.51)                                   | -0.35<br>(-1.79,1.07) | 0.04<br>(-1.43,1.53)  | -0.25<br>(-1.99,1.50) | 0.19<br>(-1.54,1.92)  | —                       |                      |                            |                            |                     |
| <b>Oral TU, 160<br/>mg/d</b>     | -0.47<br>(-1.41,0.43)                                  | -1.12<br>(-2.34,0.05) | -0.73<br>(-2.02,0.51) | -1.03<br>(-2.60,0.52) | -0.59<br>(-2.14,0.95) | -0.78<br>(-2.31,0.73)   | —                    |                            |                            |                     |
| <b>IM TU, 1000<br/>mg/10 wk</b>  | 0.17<br>(-0.77,1.19)                                   | -0.48<br>(-1.69,0.78) | -0.09<br>(-1.35,1.24) | -0.38<br>(-1.92,1.25) | 0.06<br>(-1.47,1.66)  | -0.13<br>(-1.63,1.46)   | 0.65<br>(-0.65,2.04) | —                          |                            |                     |
| <b>IM TU, 1000<br/>mg/ 12 wk</b> | 0.21<br>(-0.36,0.76)                                   | -0.44<br>(-1.40,0.49) | -0.05<br>(-1.10,0.96) | -0.34<br>(-1.72,1.02) | 0.10<br>(-1.24,1.44)  | -0.09<br>(-1.44,1.23)   | 0.68<br>(-0.29,1.68) | 0.03<br>(-1.13,1.12)       | —                          |                     |
| <b>IM TE 250<br/>mg/4wk</b>      | 0.22<br>(-1.00,1.45)                                   | -0.43<br>(-1.88,1.01) | -0.04<br>(-1.54,1.46) | -0.33<br>(-2.08,1.41) | 0.11<br>(-1.63,1.84)  | -0.08<br>(-1.80,1.62)   | 0.69<br>(-0.83,2.22) | 0.04<br>(-1.57,1.57)       | 0.01<br>(-1.33,1.36)       | —                   |

Note: IM = intramuscular injection, TE = testosterone enanthate, TU = testosterone undecanoate.  
 \*Random effects model. Analysis based on change from baseline. A positive SMD indicates improvement in erectile function. Significant changes are indicated by use of bold and colour (green indicates that the row treatment is significantly better than the column treatment, while red indicates that the row treatment is significantly worse than the column treatment). White indicates no significant difference between treatments.

Supplemental Online Content: Elliott et al. Testosterone therapy in hypogonadal men: a systematic review and network meta-analysis.

For peer review only - <http://bmjopen.bmj.com/site/about/guidelines.xhtml>

**eTable 8: Total testosterone level after 3 months of treatment – Bayesian network meta-analysis\***

\*Random effects model. Analysis based mean total testosterone level after treatment. A positive MD indicates a statistically significant improvement in total testosterone level. Significant changes are indicated by use of bold and colour (green indicates that the row treatment is significantly better than the column treatment, while red indicates that the row treatment is significantly worse than the column treatment). White indicates no significant difference between treatments.

| Treatment                    | Reference      | Mean difference<br>(95% credible intervals) |
|------------------------------|----------------|---------------------------------------------|
| Patch 4.8 mg/d               | Placebo        | 12.46(-3.49,28.17)                          |
| Patch 5 mg/d                 |                | <b>5.06(0.88,9.25)</b>                      |
| Gel 1% 50 mg/d               |                | <b>6.54(3.51,9.65)</b>                      |
| Gel 1% 75 mg/d               |                | 7.48(-2.02,17.01)                           |
| Gel 1% 100 mg/d              |                | <b>9.82(6.19,13.44)</b>                     |
| Oral TU 120 mg/d             |                | 4.31(-4.08,12.69)                           |
| Oral TU 160 mg/d             |                | 3.64(-4.69,11.86)                           |
| Testosterone pellets 1200 mg |                | 6.40(-5.08,17.89)                           |
| IM TU 1000 mg/12 wk          |                | <b>8.91(2.80,15.08)</b>                     |
| IM TE 100 mg/wk              |                | <b>12.12(3.48,20.83)</b>                    |
| IM TE 200 mg/2wk             |                | 6.26(-2.80,15.34)                           |
| IM TE 250 mg/3wk             |                | <b>12.78(1.28,24.21)</b>                    |
| IM TC 200 mg/2 wk            |                | 3.25(-6.32,12.89)                           |
| IM TC 200 mg/4 wk            |                | 1.73(-8.61,12.15)                           |
| Durateston, IM, 250 mg/4wk   |                | 2.13(-8.21,12.60)                           |
| Patch 5 mg/d                 | Patch 4.8 mg/d | -7.40(-23.71,9.17)                          |
| Gel 1% 50 mg/d               |                | -5.91(-21.92,10.35)                         |
| Gel 1% 75 mg/d               |                | -4.98(-23.37,13.63)                         |
| Gel 1% 100 mg/d              |                | -2.64(-18.80,13.74)                         |
| Oral TU 120 mg/d             |                | -8.15(-26.04,9.82)                          |
| Oral TU 160 mg/d             |                | -8.82(-22.30,4.67)                          |
| Testosterone pellets 1200 mg |                | -6.06(-18.69,6.69)                          |
| IM TU 1000 mg/12 wk          |                | -3.55(-20.42,13.57)                         |
| IM TE 100 mg/wk              |                | -0.34(-18.30,17.61)                         |
| IM TE 200 mg/2wk             |                | -6.20(-24.42,12.21)                         |
| IM TE 250 mg/3wk             |                | 0.32(-10.51,11.25)                          |
| IM TC 200 mg/2 wk            |                | -9.21(-27.76,9.46)                          |
| IM TC 200 mg/4 wk            |                | -10.72(-29.59,8.36)                         |
| Durateston, IM, 250 mg/4wk   |                | -10.33(-29.25,8.69)                         |
| Gel 1% 50 mg/d               | Patch 5 mg/d   | 1.48(-2.69,5.71)                            |
| Gel 1% 75 mg/d               |                | 2.41(-7.90,12.76)                           |
| Gel 1% 100 mg/d              |                | <b>4.76(0.40,9.04)</b>                      |
| Oral TU 120 mg/d             |                | -0.75(-10.16,8.55)                          |



|    |                              |                 |                     |
|----|------------------------------|-----------------|---------------------|
| 1  |                              |                 |                     |
| 2  |                              |                 |                     |
| 3  | Oral TU 160 mg/d             |                 | -1.43(-10.82,7.80)  |
| 4  | Testosterone pellets 1200 mg |                 | 1.34(-10.92,13.53)  |
| 5  | IM TU 1000 mg/12 wk          |                 | 3.85(-3.58,11.27)   |
| 6  | IM TE 100 mg/wk              |                 | 7.06(-2.53,16.60)   |
| 7  | IM TE 200 mg/2wk             |                 | 1.19(-8.83,11.18)   |
| 8  | IM TE 250 mg/3wk             |                 | 7.72(-4.58,19.84)   |
| 9  | IM TC 200 mg/2 wk            |                 | -1.81(-12.35,8.73)  |
| 10 | IM TC 200 mg/4 wk            |                 | -3.33(-14.50,7.86)  |
| 11 | Durateston, IM, 250 mg/4wk   |                 | -2.94(-14.12,8.32)  |
| 12 | Gel 1% 75 mg/d               | Gel 1% 50 mg/d  | 0.93(-8.98,10.93)   |
| 13 | Gel 1% 100 mg/d              |                 | 3.27(-0.68,7.16)    |
| 14 | Oral TU 120 mg/d             |                 | -2.23(-11.30,6.62)  |
| 15 | Oral TU 160 mg/d             |                 | -2.91(-11.82,5.84)  |
| 16 | Testosterone pellets 1200 mg |                 | -0.14(-12.11,11.71) |
| 17 | IM TU 1000 mg/12 wk          |                 | 2.37(-4.49,9.22)    |
| 18 | IM TE 100 mg/wk              |                 | 5.57(-3.60,14.72)   |
| 19 | IM TE 200 mg/2wk             |                 | -0.29(-9.83,9.28)   |
| 20 | IM TE 250 mg/3wk             |                 | 6.24(-5.72,18.05)   |
| 21 | IM TC 200 mg/2 wk            |                 | -3.30(-13.42,6.78)  |
| 22 | IM TC 200 mg/4 wk            |                 | -4.81(-15.66,5.96)  |
| 23 | Durateston, IM, 250 mg/4wk   |                 | -4.42(-15.28,6.46)  |
| 24 | Gel 1% 100 mg/d              | Gel 1% 75 mg/d  | 2.34(-7.87,12.46)   |
| 25 | Oral TU 120 mg/d             |                 | -3.17(-15.86,9.38)  |
| 26 | Oral TU 160 mg/d             |                 | -3.84(-16.49,8.72)  |
| 27 | Testosterone pellets 1200 mg |                 | -1.07(-15.98,13.79) |
| 28 | IM TU 1000 mg/12 wk          |                 | 1.44(-9.92,12.73)   |
| 29 | IM TE 100 mg/wk              |                 | 4.64(-8.23,17.49)   |
| 30 | IM TE 200 mg/2wk             |                 | -1.22(-14.30,11.90) |
| 31 | IM TE 250 mg/3wk             |                 | 5.31(-9.66,20.08)   |
| 32 | IM TC 200 mg/2 wk            |                 | -4.23(-17.84,9.24)  |
| 33 | IM TC 200 mg/4 wk            |                 | -5.74(-19.84,8.38)  |
| 34 | Durateston, IM, 250 mg/4wk   |                 | -5.35(-19.41,8.93)  |
| 35 | Oral TU 120 mg/d             | Gel 1% 100 mg/d | -5.51(-14.69,3.57)  |
| 36 | Oral TU 160 mg/d             |                 | -6.18(-15.23,2.79)  |
| 37 | Testosterone pellets 1200 mg |                 | -3.41(-15.41,8.57)  |
| 38 | IM TU 1000 mg/12 wk          |                 | -0.91(-8.03,6.24)   |
| 39 | IM TE 100 mg/wk              |                 | 2.30(-7.08,11.64)   |
| 40 | IM TE 200 mg/2wk             |                 | -3.56(-13.34,6.30)  |
| 41 | IM TE 250 mg/3wk             |                 | 2.96(-9.16,14.85)   |
| 42 | IM TC 200 mg/2 wk            |                 | -6.57(-16.82,3.69)  |
| 43 | IM TC 200 mg/4 wk            |                 | -8.08(-19.02,2.89)  |
| 44 | Durateston, IM, 250 mg/4wk   |                 | -7.69(-18.61,3.38)  |
| 45 |                              |                 |                     |
| 46 |                              |                 |                     |
| 47 |                              |                 |                     |
| 48 |                              |                 |                     |
| 49 |                              |                 |                     |
| 50 |                              |                 |                     |
| 51 |                              |                 |                     |
| 52 |                              |                 |                     |
| 53 |                              |                 |                     |
| 54 |                              |                 |                     |
| 55 |                              |                 |                     |
| 56 |                              |                 |                     |
| 57 |                              |                 |                     |
| 58 |                              |                 |                     |
| 59 |                              |                 |                     |
| 60 |                              |                 |                     |

|                              |                              |                         |
|------------------------------|------------------------------|-------------------------|
| Oral TU 160 mg/d             | Oral TU 120 mg/d             | -0.67(-12.46,11.10)     |
| Testosterone pellets 1200 mg |                              | 2.09(-12.01,16.29)      |
| IM TU 1000 mg/12 wk          |                              | 4.60(-5.79,14.94)       |
| IM TE 100 mg/wk              |                              | 7.81(-4.20,19.92)       |
| IM TE 200 mg/2wk             |                              | 1.95(-10.36,14.39)      |
| IM TE 250 mg/3wk             |                              | 8.47(-5.65,22.61)       |
| IM TC 200 mg/2 wk            |                              | -1.06(-13.92,11.70)     |
| IM TC 200 mg/4 wk            |                              | -2.58(-16.00,10.91)     |
| Durateston, IM, 250 mg/4wk   |                              | -2.18(-15.61,11.22)     |
| Testosterone pellets 1200 mg | Oral TU 160 mg/d             | 2.77(-5.26,10.82)       |
| IM TU 1000 mg/12 wk          |                              | 5.28(-5.00,15.64)       |
| IM TE 100 mg/wk              |                              | 8.48(-3.53,20.45)       |
| IM TE 200 mg/2wk             |                              | 2.62(-9.56,14.98)       |
| IM TE 250 mg/3wk             |                              | <b>9.15(1.17,17.13)</b> |
| IM TC 200 mg/2 wk            |                              | -0.39(-13.19,12.34)     |
| IM TC 200 mg/4 wk            |                              | -1.90(-15.18,11.34)     |
| Durateston, IM, 250 mg/4wk   |                              | -1.51(-14.84,11.86)     |
| IM TU 1000 mg/12 wk          | Testosterone pellets 1200 mg | 2.51(-10.54,15.55)      |
| IM TE 100 mg/wk              |                              | 5.71(-8.62,19.97)       |
| IM TE 200 mg/2wk             |                              | -0.15(-14.76,14.51)     |
| IM TE 250 mg/3wk             |                              | 6.38(-0.25,13.01)       |
| IM TC 200 mg/2 wk            |                              | -3.16(-18.21,11.86)     |
| IM TC 200 mg/4 wk            |                              | -4.67(-20.16,10.75)     |
| Durateston, IM, 250 mg/4wk   |                              | -4.28(-19.96,11.21)     |
| IM TE 100 mg/wk              | IM TU 1000 mg/12 wk          | 3.21(-7.33,13.81)       |
| IM TE 200 mg/2wk             |                              | -2.66(-13.63,8.30)      |
| IM TE 250 mg/3wk             |                              | 3.87(-9.22,16.79)       |
| IM TC 200 mg/2 wk            |                              | -5.66(-17.05,5.71)      |
| IM TC 200 mg/4 wk            |                              | -7.18(-15.50,1.16)      |
| Durateston, IM, 250 mg/4wk   |                              | -6.79(-15.25,1.65)      |
| IM TE 200 mg/2wk             | IM TE 100 mg/wk              | -5.86(-18.36,6.71)      |
| IM TE 250 mg/3wk             |                              | 0.66(-13.63,15.00)      |
| IM TC 200 mg/2 wk            |                              | -8.87(-21.88,4.14)      |
| IM TC 200 mg/4 wk            |                              | -10.38(-23.84,3.13)     |
| Durateston, IM, 250 mg/4wk   |                              | -9.99(-23.47,3.48)      |
| IM TE 250 mg/3wk             | IM TE 200 mg/2wk             | 6.53(-8.23,21.04)       |
| IM TC 200 mg/2 wk            |                              | -3.01(-16.17,10.25)     |
| IM TC 200 mg/4 wk            |                              | -4.52(-18.16,9.20)      |
| Durateston, IM, 250 mg/4wk   |                              | -4.13(-17.94,9.72)      |
| IM TC 200 mg/2 wk            | IM TE 250 mg/3wk             | -9.53(-24.53,5.59)      |
| IM TC 200 mg/4 wk            |                              | -11.05(-26.44,4.43)     |
| Durateston, IM, 250 mg/4wk   |                              | -10.65(-26.22,4.95)     |

|                            |                   |                     |
|----------------------------|-------------------|---------------------|
| IM TC 200 mg/4 wk          | IM TC 200 mg/2 wk | -1.51(-15.53,12.52) |
| Durateston, IM, 250 mg/4wk |                   | -1.12(-15.17,13.08) |
| Durateston, IM, 250 mg/4wk | IM TC 200 mg/4 wk | 0.39(-8.03,8.79)    |

### eTable 9: Total testosterone level after 6 months of treatment – Bayesian network meta-analysis\*

\*Random effects model. Analysis based mean total testosterone level after treatment. A positive MD indicates a statistically significant improvement in total testosterone level. Significant changes are indicated by use of bold and colour (green indicates that the row treatment is significantly better than the column treatment, while red indicates that the row treatment is significantly worse than the column treatment). White indicates no significant difference between treatments.

| Treatment                    | Reference      | Mean difference (95% credible interval) |
|------------------------------|----------------|-----------------------------------------|
| Patch 4.8 mg/d               | Placebo        | 10.69(-1.17,22.73)                      |
| Patch 5 mg/d                 |                | <b>8.45(0.51,16.35)</b>                 |
| Gel 1% 50 mg/d               |                | <b>7.94(4.36,11.49)</b>                 |
| Gel 1% 75 mg/d               |                | 5.76(-0.75,12.29)                       |
| Gel 1% 100 mg/d              |                | <b>7.47(3.50,11.40)</b>                 |
| Gel 2% 60 mg/d               |                | <b>19.80(13.59,26.00)</b>               |
| Gel 2.5%, 125 mg/d           |                | <b>12.13(2.00,22.09)</b>                |
| Gel (scrotal) 2.5%, 25 mg/d  |                | 7.89(-2.18,17.86)                       |
| Oral TU 120-160 mg/d         |                | 5.68(-0.52,11.88)                       |
| Oral TU 160 mg/d             |                | 1.84(-2.44,6.10)                        |
| Testosterone pellets 1200 mg |                | 4.69(-2.86,12.17)                       |
| IM TU 1000 mg/12 wk          |                | <b>8.07(3.71,12.46)</b>                 |
| IM TE 150 mg/2wk             |                | <b>12.72(5.10,20.29)</b>                |
| IM TE 200 mg/2wk             |                | <b>10.10(2.68,17.61)</b>                |
| IM TE 250 mg/3wk             |                | <b>11.02(3.59,18.55)</b>                |
| IM TE 300 mg/3wk             |                | <b>18.25(10.92,25.60)</b>               |
| IM TE 50-400 mg/1-2 wk       |                | <b>14.74(4.55,25.01)</b>                |
| IM TC 200 mg/2 wk            |                | 3.21(-4.73,11.12)                       |
| Patch 5 mg/d                 | Patch 4.8 mg/d | -2.24(-16.71,11.98)                     |
| Gel 1% 50 mg/d               |                | -2.75(-15.42,9.56)                      |
| Gel 1% 75 mg/d               |                | -4.94(-18.49,8.60)                      |
| Gel 1% 100 mg/d              |                | -3.22(-15.94,9.31)                      |
| Gel 2% 60 mg/d               |                | 9.11(-4.41,22.45)                       |
| Gel 2.5%, 125 mg/d           |                | 1.44(-14.32,16.85)                      |
| Gel (scrotal) 2.5%, 25 mg/d  |                | -2.80(-18.53,12.61)                     |
| Oral TU 120-160 mg/d         |                | -5.01(-18.65,8.35)                      |
| Oral TU 160 mg/d             |                | -8.85(-20.06,2.21)                      |
| Testosterone pellets 1200 mg |                | -6.01(-16.78,4.72)                      |

|    |                              |                |                            |
|----|------------------------------|----------------|----------------------------|
| 1  |                              |                |                            |
| 2  |                              |                |                            |
| 3  | IM TU 1000 mg/12 wk          |                | -2.62(-14.99,9.53)         |
| 4  | IM TE 150 mg/2wk             |                | 2.03(-12.24,16.16)         |
| 5  | IM TE 200 mg/2wk             |                | -0.59(-14.66,13.38)        |
| 6  | IM TE 250 mg/3wk             |                | 0.33(-9.00,9.68)           |
| 7  | IM TE 300 mg/3wk             |                | 7.56(-6.50,21.52)          |
| 8  | IM TE 50-400 mg/1-2 wk       |                | 4.05(-11.55,19.64)         |
| 9  | IM TC 200 mg/2 wk            |                | -7.49(-21.86,6.80)         |
| 10 | Gel 1% 50 mg/d               | Patch 5 mg/d   | -0.51(-9.17,8.26)          |
| 11 | Gel 1% 75 mg/d               |                | -2.70(-12.88,7.57)         |
| 12 | Gel 1% 100 mg/d              |                | -0.98(-9.71,7.83)          |
| 13 | Gel 2% 60 mg/d               |                | <b>11.35(1.38,21.45)</b>   |
| 14 | Gel 2.5%, 125 mg/d           |                | 3.68(-2.57,9.89)           |
| 15 | Gel (scrotal) 2.5%, 25 mg/d  |                | -0.56(-6.82,5.64)          |
| 16 | Oral TU 120-160 mg/d         |                | -2.77(-12.83,7.29)         |
| 17 | Oral TU 160 mg/d             |                | -6.61(-15.60,2.37)         |
| 18 | Testosterone pellets 1200 mg |                | -3.76(-14.64,7.17)         |
| 19 | IM TU 1000 mg/12 wk          |                | -0.38(-9.40,8.59)          |
| 20 | IM TE 150 mg/2wk             |                | 4.27(-6.77,15.19)          |
| 21 | IM TE 200 mg/2wk             |                | 1.65(-9.12,12.46)          |
| 22 | IM TE 250 mg/3wk             |                | 2.57(-8.35,13.50)          |
| 23 | IM TE 300 mg/3wk             |                | 9.80(-1.00,20.57)          |
| 24 | IM TE 50-400 mg/1-2 wk       |                | 6.29(-6.46,19.33)          |
| 25 | IM TC 200 mg/2 wk            |                | -5.25(-16.35,5.95)         |
| 26 | Gel 1% 75 mg/d               | Gel 1% 50 mg/d | -2.19(-9.54,5.26)          |
| 27 | Gel 1% 100 mg/d              |                | -0.47(-5.79,4.89)          |
| 28 | Gel 2% 60 mg/d               |                | <b>11.86(4.68,19.05)</b>   |
| 29 | Gel 2.5%, 125 mg/d           |                | 4.19(-6.52,14.80)          |
| 30 | Gel (scrotal) 2.5%, 25 mg/d  |                | -0.05(-10.72,10.61)        |
| 31 | Oral TU 120-160 mg/d         |                | -2.26(-9.34,4.96)          |
| 32 | Oral TU 160 mg/d             |                | <b>-6.10(-11.64,-0.46)</b> |
| 33 | Testosterone pellets 1200 mg |                | -3.25(-11.55,5.08)         |
| 34 | IM TU 1000 mg/12 wk          |                | 0.13(-5.49,5.79)           |
| 35 | IM TE 150 mg/2wk             |                | 4.78(-3.58,13.19)          |
| 36 | IM TE 200 mg/2wk             |                | 2.16(-5.97,10.48)          |
| 37 | IM TE 250 mg/3wk             |                | 3.08(-5.14,11.45)          |
| 38 | IM TE 300 mg/3wk             |                | <b>10.31(2.17,18.53)</b>   |
| 39 | IM TE 50-400 mg/1-2 wk       |                | 6.80(-4.00,17.62)          |
| 40 | IM TC 200 mg/2 wk            |                | -4.74(-13.42,3.94)         |
| 41 | Gel 1% 100 mg/d              | Gel 1% 75 mg/d | 1.71(-5.94,9.34)           |
| 42 | Gel 2% 60 mg/d               |                | <b>14.04(5.05,22.97)</b>   |
| 43 | Gel 2.5%, 125 mg/d           |                | 6.37(-5.71,18.31)          |
| 44 | Gel (scrotal) 2.5%, 25 mg/d  |                | 2.14(-9.89,14.03)          |
| 45 |                              |                |                            |
| 46 |                              |                |                            |
| 47 |                              |                |                            |
| 48 |                              |                |                            |
| 49 |                              |                |                            |
| 50 |                              |                |                            |
| 51 |                              |                |                            |
| 52 |                              |                |                            |
| 53 |                              |                |                            |
| 54 |                              |                |                            |
| 55 |                              |                |                            |
| 56 |                              |                |                            |
| 57 |                              |                |                            |
| 58 |                              |                |                            |
| 59 |                              |                |                            |
| 60 |                              |                |                            |

|    |                              |                    |                              |
|----|------------------------------|--------------------|------------------------------|
| 1  |                              |                    |                              |
| 2  |                              |                    |                              |
| 3  | Oral TU 120-160 mg/d         |                    | -0.07(-9.16,8.90)            |
| 4  | Oral TU 160 mg/d             |                    | -3.91(-11.78,3.88)           |
| 5  | Testosterone pellets 1200 mg |                    | -1.07(-10.98,8.82)           |
| 6  | IM TU 1000 mg/12 wk          |                    | 2.31(-5.63,10.19)            |
| 7  | IM TE 150 mg/2wk             |                    | 6.96(-3.13,17.01)            |
| 8  | IM TE 200 mg/2wk             |                    | 4.35(-5.60,14.23)            |
| 9  | IM TE 250 mg/3wk             |                    | 5.26(-4.59,15.19)            |
| 10 | IM TE 300 mg/3wk             |                    | <b>12.50(2.64,22.31)</b>     |
| 11 | IM TE 50-400 mg/1-2 wk       |                    | 8.99(-3.00,21.03)            |
| 12 | IM TC 200 mg/2 wk            |                    | -2.55(-12.74,7.68)           |
| 13 | Gel 2% 60 mg/d               | Gel 1% 100 mg/d    | <b>12.33(5.03,19.71)</b>     |
| 14 | Gel 2.5%, 125 mg/d           |                    | 4.66(-6.17,15.34)            |
| 15 | Gel (scrotal) 2.5%, 25 mg/d  |                    | 0.42(-10.35,11.17)           |
| 16 | Oral TU 120-160 mg/d         |                    | -1.79(-9.10,5.58)            |
| 17 | Oral TU 160 mg/d             |                    | -5.63(-11.50,0.28)           |
| 18 | Testosterone pellets 1200 mg |                    | -2.78(-11.34,5.78)           |
| 19 | IM TU 1000 mg/12 wk          |                    | 0.60(-5.31,6.53)             |
| 20 | IM TE 150 mg/2wk             |                    | 5.25(-3.38,13.81)            |
| 21 | IM TE 200 mg/2wk             |                    | 2.63(-5.77,11.14)            |
| 22 | IM TE 250 mg/3wk             |                    | 3.55(-4.93,12.14)            |
| 23 | IM TE 300 mg/3wk             |                    | <b>10.78(2.42,19.14)</b>     |
| 24 | IM TE 50-400 mg/1-2 wk       |                    | 7.28(-3.63,18.18)            |
| 25 | IM TC 200 mg/2 wk            |                    | -4.27(-13.06,4.61)           |
| 26 | Gel 2.5%, 125 mg/d           | Gel 2% 60 mg/d     | -7.67(-19.47,3.96)           |
| 27 | Gel (scrotal) 2.5%, 25 mg/d  |                    | -11.91(-23.69,-0.16)         |
| 28 | Oral TU 120-160 mg/d         |                    | <b>-14.11(-22.91,-5.33)</b>  |
| 29 | Oral TU 160 mg/d             |                    | <b>-17.96(-25.47,-10.36)</b> |
| 30 | Testosterone pellets 1200 mg |                    | <b>-15.11(-24.85,-5.36)</b>  |
| 31 | IM TU 1000 mg/12 wk          |                    | <b>-11.73(-19.31,-4.11)</b>  |
| 32 | IM TE 150 mg/2wk             |                    | -7.08(-16.88,2.74)           |
| 33 | IM TE 200 mg/2wk             |                    | <b>-9.70(-19.39,-0.03)</b>   |
| 34 | IM TE 250 mg/3wk             |                    | -8.78(-18.41,1.02)           |
| 35 | IM TE 300 mg/3wk             |                    | -1.55(-11.11,8.12)           |
| 36 | IM TE 50-400 mg/1-2 wk       |                    | -5.05(-16.93,6.87)           |
| 37 | IM TC 200 mg/2 wk            |                    | <b>-16.59(-26.63,-6.52)</b>  |
| 38 | Gel (scrotal) 2.5%, 25 mg/d  | Gel 2.5%, 125 mg/d | -4.24(-10.53,1.98)           |
| 39 | Oral TU 120-160 mg/d         |                    | -6.45(-18.26,5.33)           |
| 40 | Oral TU 160 mg/d             |                    | -10.29(-21.22,0.66)          |
| 41 | Testosterone pellets 1200 mg |                    | -7.44(-19.87,5.14)           |
| 42 | IM TU 1000 mg/12 wk          |                    | -4.06(-14.99,6.89)           |
| 43 | IM TE 150 mg/2wk             |                    | 0.59(-12.00,13.23)           |
| 44 | IM TE 200 mg/2wk             |                    | -2.03(-14.56,10.54)          |
| 45 |                              |                    |                              |
| 46 |                              |                    |                              |
| 47 |                              |                    |                              |
| 48 |                              |                    |                              |
| 49 |                              |                    |                              |
| 50 |                              |                    |                              |
| 51 |                              |                    |                              |
| 52 |                              |                    |                              |
| 53 |                              |                    |                              |
| 54 |                              |                    |                              |
| 55 |                              |                    |                              |
| 56 |                              |                    |                              |
| 57 |                              |                    |                              |
| 58 |                              |                    |                              |
| 59 |                              |                    |                              |
| 60 |                              |                    |                              |

|    |                              |                              |                          |
|----|------------------------------|------------------------------|--------------------------|
| 1  |                              |                              |                          |
| 2  |                              |                              |                          |
| 3  | IM TE 250 mg/3wk             |                              | -1.11(-13.58,11.45)      |
| 4  | IM TE 300 mg/3wk             |                              | 6.12(-6.29,18.59)        |
| 5  | IM TE 50-400 mg/1-2 wk       |                              | 2.62(-11.57,17.04)       |
| 6  | IM TC 200 mg/2 wk            |                              | -8.92(-21.55,3.89)       |
| 7  | Oral TU 120-160 mg/d         | Gel (scrotal) 2.5%, 25 mg/d  | -2.21(-14.01,9.62)       |
| 8  | Oral TU 160 mg/d             |                              | -6.05(-16.91,4.92)       |
| 9  | Testosterone pellets 1200 mg |                              | -3.21(-15.72,9.40)       |
| 10 | IM TU 1000 mg/12 wk          |                              | 0.18(-10.74,11.14)       |
| 11 | IM TE 150 mg/2wk             |                              | 4.82(-7.68,17.43)        |
| 12 | IM TE 200 mg/2wk             |                              | 2.21(-10.23,14.82)       |
| 13 | IM TE 250 mg/3wk             |                              | 3.13(-9.48,15.73)        |
| 14 | IM TE 300 mg/3wk             |                              | 10.36(-2.02,22.83)       |
| 15 | IM TE 50-400 mg/1-2 wk       |                              | 6.85(-7.36,21.24)        |
| 16 | IM TC 200 mg/2 wk            |                              | -4.69(-17.36,8.11)       |
| 17 | Oral TU 160 mg/d             | Oral TU 120-160 mg/d         | -3.84(-11.38,3.69)       |
| 18 | Testosterone pellets 1200 mg |                              | -1.00(-10.73,8.75)       |
| 19 | IM TU 1000 mg/12 wk          |                              | 2.39(-5.28,10.08)        |
| 20 | IM TE 150 mg/2wk             |                              | 7.03(-2.78,16.80)        |
| 21 | IM TE 200 mg/2wk             |                              | 4.42(-5.26,14.13)        |
| 22 | IM TE 250 mg/3wk             |                              | 5.33(-4.33,15.11)        |
| 23 | IM TE 300 mg/3wk             |                              | <b>12.57(2.91,22.18)</b> |
| 24 | IM TE 50-400 mg/1-2 wk       |                              | 9.06(-2.84,21.05)        |
| 25 | IM TC 200 mg/2 wk            |                              | -2.48(-12.54,7.57)       |
| 26 | Testosterone pellets 1200 mg | Oral TU 160 mg/d             | 2.84(-3.35,9.02)         |
| 27 | IM TU 1000 mg/12 wk          |                              | <b>6.23(1.04,11.41)</b>  |
| 28 | IM TE 150 mg/2wk             |                              | <b>10.87(2.16,19.57)</b> |
| 29 | IM TE 200 mg/2wk             |                              | 8.26(-0.33,16.82)        |
| 30 | IM TE 250 mg/3wk             |                              | <b>9.18(3.03,15.42)</b>  |
| 31 | IM TE 300 mg/3wk             |                              | <b>16.41(7.93,25.00)</b> |
| 32 | IM TE 50-400 mg/1-2 wk       |                              | <b>12.90(1.81,23.95)</b> |
| 33 | IM TC 200 mg/2 wk            |                              | 1.36(-7.75,10.40)        |
| 34 | IM TU 1000 mg/12 wk          | Testosterone pellets 1200 mg | 3.38(-4.67,11.50)        |
| 35 | IM TE 150 mg/2wk             |                              | 8.03(-2.77,18.77)        |
| 36 | IM TE 200 mg/2wk             |                              | 5.42(-5.01,16.06)        |
| 37 | IM TE 250 mg/3wk             |                              | <b>6.33(0.97,11.73)</b>  |
| 38 | IM TE 300 mg/3wk             |                              | <b>13.57(3.19,24.08)</b> |
| 39 | IM TE 50-400 mg/1-2 wk       |                              | 10.06(-2.53,22.73)       |
| 40 | IM TC 200 mg/2 wk            |                              | -1.48(-12.38,9.46)       |
| 41 | IM TE 150 mg/2wk             | IM TU 1000 mg/12 wk          | 4.65(-4.13,13.37)        |
| 42 | IM TE 200 mg/2wk             |                              | 2.03(-6.70,10.69)        |
| 43 | IM TE 250 mg/3wk             |                              | 2.95(-5.08,11.11)        |
| 44 | IM TE 300 mg/3wk             |                              | <b>10.18(1.58,18.75)</b> |
| 45 |                              |                              |                          |
| 46 |                              |                              |                          |
| 47 |                              |                              |                          |
| 48 |                              |                              |                          |
| 49 |                              |                              |                          |
| 50 |                              |                              |                          |
| 51 |                              |                              |                          |
| 52 |                              |                              |                          |
| 53 |                              |                              |                          |
| 54 |                              |                              |                          |
| 55 |                              |                              |                          |
| 56 |                              |                              |                          |
| 57 |                              |                              |                          |
| 58 |                              |                              |                          |
| 59 |                              |                              |                          |
| 60 |                              |                              |                          |

|                        |                        |                             |
|------------------------|------------------------|-----------------------------|
| IM TE 50-400 mg/1-2 wk |                        | 6.68(-4.45,17.75)           |
| IM TC 200 mg/2 wk      |                        | -4.86(-13.89,4.19)          |
| IM TE 200 mg/2wk       | IM TE 150 mg/2wk       | -2.61(-13.28,8.17)          |
| IM TE 250 mg/3wk       |                        | -1.70(-12.39,9.20)          |
| IM TE 300 mg/3wk       |                        | 5.54(-5.10,16.15)           |
| IM TE 50-400 mg/1-2 wk |                        | 2.03(-10.78,14.82)          |
| IM TC 200 mg/2 wk      |                        | -9.51(-20.53,1.51)          |
| IM TE 250 mg/3wk       | IM TE 200 mg/2wk       | 0.92(-9.64,11.36)           |
| IM TE 300 mg/3wk       |                        | 8.15(-2.38,18.61)           |
| IM TE 50-400 mg/1-2 wk |                        | 4.64(-7.93,17.27)           |
| IM TC 200 mg/2 wk      |                        | -6.90(-17.80,4.00)          |
| IM TE 300 mg/3wk       | IM TE 250 mg/3wk       | 7.23(-3.23,17.75)           |
| IM TE 50-400 mg/1-2 wk |                        | 3.73(-8.88,16.28)           |
| IM TC 200 mg/2 wk      | IM TE 300 mg/3wk       | -7.81(-18.75,3.15)          |
| IM TE 50-400 mg/1-2 wk |                        | -3.51(-16.11,8.94)          |
| IM TC 200 mg/2 wk      |                        | <b>-15.05(-25.92,-4.21)</b> |
| IM TC 200 mg/2 wk      | IM TE 50-400 mg/1-2 wk | -11.54(-24.57,1.32)         |

**eTable 10: Total testosterone levels at the end of treatment – Bayesian network meta-analysis\***

\*Random effects model. Analysis based mean total testosterone level after treatment. A positive MD indicates a statistically significant improvement in total testosterone level. Significant changes are indicated by use of bold and colour (green indicates that the row treatment is significantly better than the column treatment, while red indicates that the row treatment is significantly worse than the column treatment). White indicates no significant difference between treatments.

| Treatment                    | Reference | Mean difference<br>(95% credible interval) |
|------------------------------|-----------|--------------------------------------------|
| Patch 4.8 mg/d               | Placebo   | 8.00(-3.40,19.24)                          |
| Patch 5 mg/d                 |           | 4.74(1.65,7.84)                            |
| Gel 1% 5 mg/d                |           | 3.66(-4.21,11.57)                          |
| Gel 1% 50 mg/d               |           | 6.54(4.27,8.85)                            |
| Gel 1% 75 mg/d               |           | 6.49(0.92,12.04)                           |
| Gel 1% 100 mg/d              |           | 9.76(6.92,12.61)                           |
| Gel 2% 60 mg/d               |           | 19.76(12.66,26.85)                         |
| Gel 2.5%, 125 mg/d           |           | 8.44(0.75,16.16)                           |
| Gel (scrotal) 2.5%, 25 mg/d  |           | 4.19(-3.53,11.91)                          |
| Solution 2%, 60 mg/d         |           | 8.47(0.47,16.40)                           |
| Oral TU 120 mg/d             |           | 4.32(-2.98,11.63)                          |
| Oral TU 160 mg/d             |           | 1.40(-2.28,5.08)                           |
| Oral TU 120-160 mg/d         |           | 5.69(-1.33,12.73)                          |
| Testosterone pellets 1200 mg |           | 2.77(-3.99,9.50)                           |
| IM TU 1000 mg/9 wk           |           | 16.32(6.99,25.58)                          |
| IM TU 1000 mg/10 wk          |           | 5.70(0.07,11.29)                           |

|    |                              |                |                     |
|----|------------------------------|----------------|---------------------|
| 1  |                              |                |                     |
| 2  |                              |                |                     |
| 3  | IM TU 1000 mg/12 wk          |                | 8.45(5.99,10.90)    |
| 4  | IM TE 100 mg/wk              |                | 9.52(4.08,14.91)    |
| 5  | IM TE 125 mg/wk              |                | 6.76(-3.38,16.87)   |
| 6  | IM TE 150 mg/2wk             |                | 12.71(4.36,21.09)   |
| 7  | IM TE 200 mg/2wk             |                | 10.67(5.96,15.35)   |
| 8  | IM TE 250 mg/3wk             |                | 8.33(2.98,13.71)    |
| 9  | IM TE 300 mg/3wk             |                | 18.26(9.96,26.49)   |
| 10 | IM TE 50-400 mg/1-2 wk       |                | 14.74(3.91,25.46)   |
| 11 | IM TC 200 mg/2 wk            |                | 3.20(-5.49,11.85)   |
| 12 | IM TC 200 mg/4 wk            |                | 1.30(-6.39,8.98)    |
| 13 | IM TC 250 mg/2wk             |                | 9.73(1.91,17.51)    |
| 14 | Durateston, IM, 250 mg/4wk   |                | 1.67(-6.17,9.42)    |
| 15 | Patch 5 mg/d                 | Patch 4.8 mg/d | -3.26(-14.89,8.56)  |
| 16 | Gel 1% 5 mg/d                |                | -4.34(-18.04,9.54)  |
| 17 | Gel 1% 50 mg/d               |                | -1.46(-12.93,10.15) |
| 18 | Gel 1% 75 mg/d               |                | -1.51(-14.10,11.24) |
| 19 | Gel 1% 100 mg/d              |                | 1.76(-9.83,13.46)   |
| 20 | Gel 2% 60 mg/d               |                | 11.76(-1.57,25.26)  |
| 21 | Gel 2.5%, 125 mg/d           |                | 0.44(-13.20,14.18)  |
| 22 | Gel (scrotal) 2.5%, 25 mg/d  |                | -3.81(-17.47,9.95)  |
| 23 | Solution 2%, 60 mg/d         |                | 0.47(-13.38,14.35)  |
| 24 | Oral TU 120 mg/d             |                | -3.68(-17.02,9.84)  |
| 25 | Oral TU 160 mg/d             |                | -6.60(-17.82,4.81)  |
| 26 | Oral TU 120-160 mg/d         |                | -2.31(-15.69,11.06) |
| 27 | Testosterone pellets 1200 mg |                | -5.23(-16.69,6.32)  |
| 28 | IM TU 1000 mg/9 wk           |                | 8.32(-4.22,20.91)   |
| 29 | IM TU 1000 mg/10 wk          |                | -2.30(-14.89,10.43) |
| 30 | IM TU 1000 mg/12 wk          |                | 0.45(-11.02,12.05)  |
| 31 | IM TE 100 mg/wk              |                | 1.52(-10.96,14.13)  |
| 32 | IM TE 125 mg/wk              |                | -1.24(-16.45,13.89) |
| 33 | IM TE 150 mg/2wk             |                | 4.71(-9.35,18.84)   |
| 34 | IM TE 200 mg/2wk             |                | 2.67(-9.60,14.94)   |
| 35 | IM TE 250 mg/3wk             |                | 0.33(-9.63,10.45)   |
| 36 | IM TE 300 mg/3wk             |                | 10.26(-3.79,24.37)  |
| 37 | IM TE 50-400 mg/1-2 wk       |                | 6.75(-8.90,22.49)   |
| 38 | IM TC 200 mg/2 wk            |                | -4.80(-19.10,9.52)  |
| 39 | IM TC 200 mg/4 wk            |                | -6.70(-20.28,7.08)  |
| 40 | IM TC 250 mg/2wk             |                | 1.73(-11.91,15.43)  |
| 41 | Durateston, IM, 250 mg/4wk   |                | -6.33(-20.01,7.57)  |
| 42 | Gel 1% 5 mg/d                | Patch 5 mg/d   | -1.08(-9.49,7.42)   |
| 43 | Gel 1% 50 mg/d               |                | 1.80(-1.49,5.16)    |
| 44 | Gel 1% 75 mg/d               |                | 1.76(-4.64,8.14)    |
| 45 |                              |                |                     |
| 46 |                              |                |                     |
| 47 |                              |                |                     |
| 48 |                              |                |                     |
| 49 |                              |                |                     |
| 50 |                              |                |                     |
| 51 |                              |                |                     |
| 52 |                              |                |                     |
| 53 |                              |                |                     |
| 54 |                              |                |                     |
| 55 |                              |                |                     |
| 56 |                              |                |                     |
| 57 |                              |                |                     |
| 58 |                              |                |                     |
| 59 |                              |                |                     |
| 60 |                              |                |                     |



|    |                              |               |                    |
|----|------------------------------|---------------|--------------------|
| 1  |                              |               |                    |
| 2  |                              |               |                    |
| 3  | Gel 1% 100 mg/d              |               | 5.02(1.52,8.49)    |
| 4  | Gel 2% 60 mg/d               |               | 15.02(7.19,22.80)  |
| 5  | Gel 2.5%, 125 mg/d           |               | 3.70(-3.39,10.73)  |
| 6  | Gel (scrotal) 2.5%, 25 mg/d  |               | -0.55(-7.68,6.53)  |
| 7  |                              |               |                    |
| 8  | Solution 2%, 60 mg/d         |               | 3.73(-4.85,12.32)  |
| 9  |                              |               |                    |
| 10 | Oral TU 120 mg/d             |               | -0.41(-8.32,7.44)  |
| 11 | Oral TU 160 mg/d             |               | -3.33(-8.17,1.43)  |
| 12 | Oral TU 120-160 mg/d         |               | 0.95(-6.78,8.61)   |
| 13 | Testosterone pellets 1200 mg |               | -1.97(-9.42,5.39)  |
| 14 | IM TU 1000 mg/9 wk           |               | 11.58(1.73,21.42)  |
| 15 | IM TU 1000 mg/10 wk          |               | 0.96(-5.42,7.38)   |
| 16 | IM TU 1000 mg/12 wk          |               | 3.72(-0.31,7.66)   |
| 17 | IM TE 100 mg/wk              |               | 4.78(-1.44,10.97)  |
| 18 | IM TE 125 mg/wk              |               | 2.02(-8.51,12.56)  |
| 19 | IM TE 150 mg/2wk             |               | 7.97(-0.95,16.86)  |
| 20 | IM TE 200 mg/2wk             |               | 5.93(0.94,10.87)   |
| 21 | IM TE 250 mg/3wk             |               | 3.59(-2.64,9.81)   |
| 22 | IM TE 300 mg/3wk             |               | 13.52(4.66,22.31)  |
| 23 | IM TE 50-400 mg/1-2 wk       |               | 10.01(-1.36,21.18) |
| 24 | IM TC 200 mg/2 wk            |               | -1.54(-10.74,7.65) |
| 25 | IM TC 200 mg/4 wk            |               | -3.44(-11.77,4.80) |
| 26 | IM TC 250 mg/2wk             |               | 4.99(-3.43,13.41)  |
| 27 | Durateston, IM, 250 mg/4wk   |               | -3.07(-11.56,5.28) |
| 28 | Gel 1% 50 mg/d               | Gel 1% 5 mg/d | 2.88(-5.34,11.08)  |
| 29 | Gel 1% 75 mg/d               |               | 2.83(-6.84,12.54)  |
| 30 | Gel 1% 100 mg/d              |               | 6.10(-2.30,14.48)  |
| 31 | Gel 2% 60 mg/d               |               | 16.10(5.47,26.65)  |
| 32 | Gel 2.5%, 125 mg/d           |               | 4.78(-6.22,15.83)  |
| 33 | Gel (scrotal) 2.5%, 25 mg/d  |               | 0.53(-10.48,11.48) |
| 34 | Solution 2%, 60 mg/d         |               | 4.81(-6.33,15.99)  |
| 35 | Oral TU 120 mg/d             |               | 0.66(-9.98,11.41)  |
| 36 | Oral TU 160 mg/d             |               | -2.26(-10.97,6.42) |
| 37 | Oral TU 120-160 mg/d         |               | 2.02(-8.54,12.63)  |
| 38 | Testosterone pellets 1200 mg |               | -0.89(-11.28,9.45) |
| 39 | IM TU 1000 mg/9 wk           |               | 12.66(0.32,24.84)  |
| 40 | IM TU 1000 mg/10 wk          |               | 2.04(-7.64,11.75)  |
| 41 | IM TU 1000 mg/12 wk          |               | 4.79(-3.47,12.95)  |
| 42 | IM TE 100 mg/wk              |               | 5.86(-3.72,15.40)  |
| 43 | IM TE 125 mg/wk              |               | 3.10(-9.72,15.94)  |
| 44 | IM TE 150 mg/2wk             |               | 9.05(-2.41,20.56)  |
| 45 | IM TE 200 mg/2wk             |               | 7.01(-2.27,16.13)  |
| 46 | IM TE 250 mg/3wk             |               | 4.67(-4.87,14.18)  |
| 47 |                              |               |                    |
| 48 |                              |               |                    |
| 49 |                              |               |                    |
| 50 |                              |               |                    |
| 51 |                              |               |                    |
| 52 |                              |               |                    |
| 53 |                              |               |                    |
| 54 |                              |               |                    |
| 55 |                              |               |                    |
| 56 |                              |               |                    |
| 57 |                              |               |                    |
| 58 |                              |               |                    |
| 59 |                              |               |                    |
| 60 |                              |               |                    |

|                              |                |                     |
|------------------------------|----------------|---------------------|
| IM TE 300 mg/3wk             |                | 14.60(3.17,26.00)   |
| IM TE 50-400 mg/1-2 wk       |                | 11.08(-2.35,24.44)  |
| IM TC 200 mg/2 wk            |                | -0.46(-12.22,11.21) |
| IM TC 200 mg/4 wk            |                | -2.37(-13.33,8.57)  |
| IM TC 250 mg/2wk             |                | 6.07(-5.05,17.18)   |
| Durateston, IM, 250 mg/4wk   |                | -1.99(-13.08,9.06)  |
| Gel 1% 75 mg/d               | Gel 1% 50 mg/d | -0.05(-6.06,5.96)   |
| Gel 1% 100 mg/d              |                | 3.22(0.05,6.36)     |
| Gel 2% 60 mg/d               |                | 13.22(5.72,20.65)   |
| Gel 2.5%, 125 mg/d           |                | 1.90(-5.89,9.68)    |
| Gel (scrotal) 2.5%, 25 mg/d  |                | -2.35(-10.23,5.47)  |
| Solution 2%, 60 mg/d         |                | 1.93(-6.45,10.21)   |
| Oral TU 120 mg/d             |                | -2.22(-9.89,5.36)   |
| Oral TU 160 mg/d             |                | -5.14(-9.50,-0.83)  |
| Oral TU 120-160 mg/d         |                | -0.86(-8.26,6.53)   |
| Testosterone pellets 1200 mg |                | -3.77(-10.93,3.32)  |
| IM TU 1000 mg/9 wk           |                | 9.78(0.12,19.31)    |
| IM TU 1000 mg/10 wk          |                | -0.84(-6.93,5.22)   |
| IM TU 1000 mg/12 wk          |                | 1.91(-1.49,5.22)    |
| IM TE 100 mg/wk              |                | 2.98(-2.97,8.82)    |
| IM TE 125 mg/wk              |                | 0.22(-10.17,10.56)  |
| IM TE 150 mg/2wk             |                | 6.17(-2.50,14.84)   |
| IM TE 200 mg/2wk             |                | 4.13(-0.98,9.17)    |
| IM TE 250 mg/3wk             |                | 1.79(-4.11,7.62)    |
| IM TE 300 mg/3wk             |                | 11.72(3.13,20.20)   |
| IM TE 50-400 mg/1-2 wk       |                | 8.20(-2.93,19.12)   |
| IM TC 200 mg/2 wk            |                | -3.34(-12.34,5.62)  |
| IM TC 200 mg/4 wk            |                | -5.25(-13.24,2.71)  |
| IM TC 250 mg/2wk             |                | 3.19(-4.96,11.30)   |
| Durateston, IM, 250 mg/4wk   |                | -4.87(-13.08,3.23)  |
| Gel 1% 100 mg/d              | Gel 1% 75 mg/d | 3.26(-3.00,9.49)    |
| Gel 2% 60 mg/d               |                | 13.27(4.21,22.29)   |
| Gel 2.5%, 125 mg/d           |                | 1.95(-7.52,11.42)   |
| Gel (scrotal) 2.5%, 25 mg/d  |                | -2.30(-11.80,7.19)  |
| Solution 2%, 60 mg/d         |                | 1.98(-7.79,11.68)   |
| Oral TU 120 mg/d             |                | -2.17(-11.46,7.10)  |
| Oral TU 160 mg/d             |                | -5.09(-11.81,1.62)  |
| Oral TU 120-160 mg/d         |                | -0.81(-9.76,8.21)   |
| Testosterone pellets 1200 mg |                | -3.72(-12.49,5.06)  |
| IM TU 1000 mg/9 wk           |                | 9.83(-1.12,20.61)   |
| IM TU 1000 mg/10 wk          |                | -0.79(-8.71,7.09)   |
| IM TU 1000 mg/12 wk          |                | 1.96(-4.14,8.02)    |

|    |                              |                 |                       |
|----|------------------------------|-----------------|-----------------------|
| 1  |                              |                 |                       |
| 2  |                              |                 |                       |
| 3  | IM TE 100 mg/wk              |                 | 3.03(-4.78,10.84)     |
| 4  | IM TE 125 mg/wk              |                 | 0.27(-11.29,11.76)    |
| 5  | IM TE 150 mg/2wk             |                 | 6.21(-3.81,16.26)     |
| 6  | IM TE 200 mg/2wk             |                 | 4.18(-3.13,11.49)     |
| 7  | IM TE 250 mg/3wk             |                 | 1.84(-5.91,9.60)      |
| 8  | IM TE 300 mg/3wk             |                 | 11.76(1.77,21.71)     |
| 9  | IM TE 50-400 mg/1-2 wk       |                 | 8.25(-3.95,20.40)     |
| 10 | IM TC 200 mg/2 wk            |                 | -3.30(-13.57,7.03)    |
| 11 | IM TC 200 mg/4 wk            |                 | -5.20(-14.75,4.38)    |
| 12 | IM TC 250 mg/2wk             |                 | 3.24(-6.31,12.84)     |
| 13 | Durateston, IM, 250 mg/4wk   |                 | -4.82(-14.54,4.73)    |
| 14 | Gel 2% 60 mg/d               | Gel 1% 100 mg/d | 10.00(2.31,17.65)     |
| 15 | Gel 2.5%, 125 mg/d           |                 | -1.32(-9.14,6.53)     |
| 16 | Gel (scrotal) 2.5%, 25 mg/d  |                 | -5.57(-13.46,2.30)    |
| 17 | Solution 2%, 60 mg/d         |                 | -1.29(-9.81,7.12)     |
| 18 | Oral TU 120 mg/d             |                 | -5.43(-13.31,2.41)    |
| 19 | Oral TU 160 mg/d             |                 | -8.35(-13.01,-3.72)   |
| 20 | Oral TU 120-160 mg/d         |                 | -4.07(-11.66,3.46)    |
| 21 | Testosterone pellets 1200 mg |                 | -6.98(-14.31,0.32)    |
| 22 | IM TU 1000 mg/9 wk           |                 | 6.56(-3.21,16.30)     |
| 23 | IM TU 1000 mg/10 wk          |                 | -4.05(-10.36,2.25)    |
| 24 | IM TU 1000 mg/12 wk          |                 | -1.30(-5.08,2.39)     |
| 25 | IM TE 100 mg/wk              |                 | -0.24(-6.33,5.86)     |
| 26 | IM TE 125 mg/wk              |                 | -3.00(-13.56,7.45)    |
| 27 | IM TE 150 mg/2wk             |                 | 2.95(-5.87,11.76)     |
| 28 | IM TE 200 mg/2wk             |                 | 0.91(-4.37,6.24)      |
| 29 | IM TE 250 mg/3wk             |                 | -1.43(-7.51,4.70)     |
| 30 | IM TE 300 mg/3wk             |                 | 8.50(-0.26,17.19)     |
| 31 | IM TE 50-400 mg/1-2 wk       |                 | 4.99(-6.29,16.05)     |
| 32 | IM TC 200 mg/2 wk            |                 | -6.56(-15.67,2.62)    |
| 33 | IM TC 200 mg/4 wk            |                 | -8.46(-16.58,-0.35)   |
| 34 | IM TC 250 mg/2wk             |                 | -0.03(-8.32,8.21)     |
| 35 | Durateston, IM, 250 mg/4wk   |                 | -8.09(-16.37,0.19)    |
| 36 | Gel 2.5%, 125 mg/d           | Gel 2% 60 mg/d  | -11.32(-21.81,-0.76)  |
| 37 | Gel (scrotal) 2.5%, 25 mg/d  |                 | -15.57(-26.01,-5.14)  |
| 38 | Solution 2%, 60 mg/d         |                 | -11.29(-22.04,-0.61)  |
| 39 | Oral TU 120 mg/d             |                 | -15.44(-25.55,-5.26)  |
| 40 | Oral TU 160 mg/d             |                 | -18.36(-26.38,-10.40) |
| 41 | Oral TU 120-160 mg/d         |                 | -14.08(-24.01,-4.07)  |
| 42 | Testosterone pellets 1200 mg |                 | -16.99(-26.76,-7.21)  |
| 43 | IM TU 1000 mg/9 wk           |                 | -3.44(-15.22,8.28)    |
| 44 | IM TU 1000 mg/10 wk          |                 | -14.06(-23.21,-4.99)  |
| 45 |                              |                 |                       |
| 46 |                              |                 |                       |
| 47 |                              |                 |                       |
| 48 |                              |                 |                       |
| 49 |                              |                 |                       |
| 50 |                              |                 |                       |
| 51 |                              |                 |                       |
| 52 |                              |                 |                       |
| 53 |                              |                 |                       |
| 54 |                              |                 |                       |
| 55 |                              |                 |                       |
| 56 |                              |                 |                       |
| 57 |                              |                 |                       |
| 58 |                              |                 |                       |
| 59 |                              |                 |                       |
| 60 |                              |                 |                       |

|    |                              |                             |                      |
|----|------------------------------|-----------------------------|----------------------|
| 1  |                              |                             |                      |
| 2  |                              |                             |                      |
| 3  | IM TU 1000 mg/12 wk          |                             | -11.31(-18.81,-3.79) |
| 4  | IM TE 100 mg/wk              |                             | -10.24(-19.18,-1.26) |
| 5  | IM TE 125 mg/wk              |                             | -13.00(-25.43,-0.67) |
| 6  |                              |                             |                      |
| 7  | IM TE 150 mg/2wk             |                             | -7.05(-18.02,3.89)   |
| 8  | IM TE 200 mg/2wk             |                             | -9.09(-17.56,-0.59)  |
| 9  |                              |                             |                      |
| 10 | IM TE 250 mg/3wk             |                             | -11.43(-20.28,-2.55) |
| 11 | IM TE 300 mg/3wk             |                             | -1.50(-12.41,9.29)   |
| 12 | IM TE 50-400 mg/1-2 wk       |                             | -5.02(-17.95,7.94)   |
| 13 | IM TC 200 mg/2 wk            |                             | -16.56(-27.65,-5.38) |
| 14 | IM TC 200 mg/4 wk            |                             | -18.47(-28.79,-7.99) |
| 15 | IM TC 250 mg/2wk             |                             | -10.03(-20.60,0.55)  |
| 16 | Durateston, IM, 250 mg/4wk   |                             | -18.09(-28.55,-7.51) |
| 17 | Gel (scrotal) 2.5%, 25 mg/d  | Gel 2.5%, 125 mg/d          | -4.25(-11.32,2.85)   |
| 18 |                              |                             |                      |
| 19 | Solution 2%, 60 mg/d         |                             | 0.03(-11.01,11.05)   |
| 20 | Oral TU 120 mg/d             |                             | -4.11(-14.77,6.43)   |
| 21 | Oral TU 160 mg/d             |                             | -7.03(-15.56,1.49)   |
| 22 | Oral TU 120-160 mg/d         |                             | -2.75(-13.20,7.62)   |
| 23 | Testosterone pellets 1200 mg |                             | -5.67(-15.93,4.50)   |
| 24 |                              |                             |                      |
| 25 | IM TU 1000 mg/9 wk           |                             | 7.88(-4.23,19.98)    |
| 26 | IM TU 1000 mg/10 wk          |                             | -2.74(-12.35,6.74)   |
| 27 | IM TU 1000 mg/12 wk          |                             | 0.02(-8.05,8.09)     |
| 28 | IM TE 100 mg/wk              |                             | 1.08(-8.38,10.49)    |
| 29 | IM TE 125 mg/wk              |                             | -1.68(-14.40,11.04)  |
| 30 | IM TE 150 mg/2wk             |                             | 4.27(-7.05,15.61)    |
| 31 | IM TE 200 mg/2wk             |                             | 2.23(-6.41,10.86)    |
| 32 | IM TE 250 mg/3wk             |                             | -0.11(-9.59,9.27)    |
| 33 | IM TE 300 mg/3wk             |                             | 9.82(-1.46,21.10)    |
| 34 | IM TE 50-400 mg/1-2 wk       |                             | 6.31(-7.08,19.61)    |
| 35 | IM TC 200 mg/2 wk            |                             | -5.24(-16.86,6.39)   |
| 36 | IM TC 200 mg/4 wk            |                             | -7.14(-18.05,3.70)   |
| 37 | IM TC 250 mg/2wk             |                             | 1.29(-9.68,12.14)    |
| 38 | Durateston, IM, 250 mg/4wk   |                             | -6.77(-17.77,4.17)   |
| 39 | Solution 2%, 60 mg/d         | Gel (scrotal) 2.5%, 25 mg/d | 4.28(-6.76,15.29)    |
| 40 | Oral TU 120 mg/d             |                             | 0.13(-10.41,10.69)   |
| 41 | Oral TU 160 mg/d             |                             | -2.79(-11.32,5.78)   |
| 42 | Oral TU 120-160 mg/d         |                             | 1.49(-8.95,11.85)    |
| 43 | Testosterone pellets 1200 mg |                             | -1.42(-11.69,8.77)   |
| 44 |                              |                             |                      |
| 45 | IM TU 1000 mg/9 wk           |                             | 12.13(-0.05,24.28)   |
| 46 | IM TU 1000 mg/10 wk          |                             | 1.51(-8.10,11.01)    |
| 47 | IM TU 1000 mg/12 wk          |                             | 4.26(-3.85,12.36)    |
| 48 | IM TE 100 mg/wk              |                             | 5.33(-4.13,14.73)    |
| 49 | IM TE 125 mg/wk              |                             | 2.57(-10.20,15.23)   |
| 50 |                              |                             |                      |
| 51 |                              |                             |                      |
| 52 |                              |                             |                      |
| 53 |                              |                             |                      |
| 54 |                              |                             |                      |
| 55 |                              |                             |                      |
| 56 |                              |                             |                      |
| 57 |                              |                             |                      |
| 58 |                              |                             |                      |
| 59 |                              |                             |                      |
| 60 |                              |                             |                      |

|    |                              |                      |                     |
|----|------------------------------|----------------------|---------------------|
| 1  |                              |                      |                     |
| 2  |                              |                      |                     |
| 3  | IM TE 150 mg/2wk             |                      | 8.52(-2.86,19.92)   |
| 4  | IM TE 200 mg/2wk             |                      | 6.48(-2.21,15.12)   |
| 5  | IM TE 250 mg/3wk             |                      | 4.14(-5.23,13.54)   |
| 6  | IM TE 300 mg/3wk             |                      | 14.07(2.81,25.31)   |
| 7  |                              |                      |                     |
| 8  | IM TE 50-400 mg/1-2 wk       |                      | 10.55(-2.91,23.84)  |
| 9  |                              |                      |                     |
| 10 | IM TC 200 mg/2 wk            |                      | -0.99(-12.60,10.58) |
| 11 | IM TC 200 mg/4 wk            |                      | -2.90(-13.82,8.03)  |
| 12 | IM TC 250 mg/2wk             |                      | 5.54(-5.44,16.60)   |
| 13 | Durateston, IM, 250 mg/4wk   |                      | -2.52(-13.52,8.43)  |
| 14 | Oral TU 120 mg/d             | Solution 2%, 60 mg/d | -4.15(-14.97,6.71)  |
| 15 | Oral TU 160 mg/d             |                      | -7.07(-15.82,1.75)  |
| 16 | Oral TU 120-160 mg/d         |                      | -2.79(-13.42,7.91)  |
| 17 | Testosterone pellets 1200 mg |                      | -5.70(-16.19,4.77)  |
| 18 |                              |                      |                     |
| 19 |                              |                      |                     |
| 20 | IM TU 1000 mg/9 wk           |                      | 7.85(-4.39,20.17)   |
| 21 | IM TU 1000 mg/10 wk          |                      | -2.77(-12.56,7.00)  |
| 22 | IM TU 1000 mg/12 wk          |                      | -0.02(-8.34,8.36)   |
| 23 |                              |                      |                     |
| 24 | IM TE 100 mg/wk              |                      | 1.05(-8.64,10.74)   |
| 25 | IM TE 125 mg/wk              |                      | -1.71(-14.70,11.26) |
| 26 | IM TE 150 mg/2wk             |                      | 4.24(-7.33,15.76)   |
| 27 | IM TE 200 mg/2wk             |                      | 2.20(-6.98,11.47)   |
| 28 | IM TE 250 mg/3wk             |                      | -0.14(-9.75,9.50)   |
| 29 | IM TE 300 mg/3wk             |                      | 9.79(-1.75,21.38)   |
| 30 | IM TE 50-400 mg/1-2 wk       |                      | 6.27(-7.18,19.70)   |
| 31 | IM TC 200 mg/2 wk            |                      | -5.27(-17.13,6.58)  |
| 32 | IM TC 200 mg/4 wk            |                      | -7.17(-18.19,4.01)  |
| 33 | IM TC 250 mg/2wk             |                      | 1.26(-9.92,12.47)   |
| 34 | Durateston, IM, 250 mg/4wk   |                      | -6.80(-17.95,4.39)  |
| 35 | Oral TU 160 mg/d             | Oral TU 120 mg/d     | -2.92(-11.18,5.30)  |
| 36 | Oral TU 120-160 mg/d         |                      | 1.36(-8.75,11.51)   |
| 37 | Testosterone pellets 1200 mg |                      | -1.55(-11.47,8.35)  |
| 38 |                              |                      |                     |
| 39 |                              |                      |                     |
| 40 | IM TU 1000 mg/9 wk           |                      | 11.99(0.22,23.80)   |
| 41 | IM TU 1000 mg/10 wk          |                      | 1.38(-7.80,10.65)   |
| 42 | IM TU 1000 mg/12 wk          |                      | 4.13(-3.60,11.79)   |
| 43 | IM TE 100 mg/wk              |                      | 5.20(-3.98,14.29)   |
| 44 | IM TE 125 mg/wk              |                      | 2.44(-10.06,15.00)  |
| 45 | IM TE 150 mg/2wk             |                      | 8.38(-2.65,19.47)   |
| 46 | IM TE 200 mg/2wk             |                      | 6.35(-2.24,15.06)   |
| 47 | IM TE 250 mg/3wk             |                      | 4.01(-5.04,13.13)   |
| 48 | IM TE 300 mg/3wk             |                      | 13.93(2.85,24.90)   |
| 49 | IM TE 50-400 mg/1-2 wk       |                      | 10.42(-2.47,23.36)  |
| 50 | IM TC 200 mg/2 wk            |                      | -1.13(-12.50,10.16) |
| 51 | IM TC 200 mg/4 wk            |                      | -3.03(-13.54,7.52)  |
| 52 |                              |                      |                     |
| 53 |                              |                      |                     |
| 54 |                              |                      |                     |
| 55 |                              |                      |                     |
| 56 |                              |                      |                     |
| 57 |                              |                      |                     |
| 58 |                              |                      |                     |
| 59 |                              |                      |                     |
| 60 |                              |                      |                     |

|    |                              |                              |                    |
|----|------------------------------|------------------------------|--------------------|
| 1  | IM TC 250 mg/2wk             |                              | 5.41(-5.24,16.03)  |
| 2  | Durateston, IM, 250 mg/4wk   |                              | -2.65(-13.24,7.90) |
| 3  | Oral TU 120-160 mg/d         | Oral TU 160 mg/d             | 4.28(-3.65,12.24)  |
| 4  | Testosterone pellets 1200 mg |                              | 1.37(-5.02,7.65)   |
| 5  | IM TU 1000 mg/9 wk           |                              | 14.91(5.60,24.22)  |
| 6  | IM TU 1000 mg/10 wk          |                              | 4.30(-2.44,10.98)  |
| 7  | IM TU 1000 mg/12 wk          |                              | 7.05(2.88,11.22)   |
| 8  | IM TE 100 mg/wk              |                              | 8.12(1.58,14.65)   |
| 9  | IM TE 125 mg/wk              |                              | 5.36(-5.44,16.14)  |
| 10 | IM TE 150 mg/2wk             |                              | 11.30(2.17,20.50)  |
| 11 | IM TE 200 mg/2wk             |                              | 9.27(3.31,15.24)   |
| 12 | IM TE 250 mg/3wk             |                              | 6.93(1.62,12.24)   |
| 13 | IM TE 300 mg/3wk             |                              | 16.85(7.78,25.85)  |
| 14 | IM TE 50-400 mg/1-2 wk       |                              | 13.34(1.90,24.69)  |
| 15 | IM TC 200 mg/2 wk            |                              | 1.79(-7.65,11.19)  |
| 16 | IM TC 200 mg/4 wk            |                              | -0.11(-8.45,8.32)  |
| 17 | IM TC 250 mg/2wk             |                              | 8.33(-0.32,16.90)  |
| 18 | Durateston, IM, 250 mg/4wk   |                              | 0.27(-8.25,8.73)   |
| 19 | Testosterone pellets 1200 mg | Oral TU 120-160 mg/d         | -2.91(-12.66,6.81) |
| 20 | IM TU 1000 mg/9 wk           |                              | 10.63(-1.05,22.19) |
| 21 | IM TU 1000 mg/10 wk          |                              | 0.02(-8.97,9.02)   |
| 22 | IM TU 1000 mg/12 wk          |                              | 2.77(-4.70,10.19)  |
| 23 | IM TE 100 mg/wk              |                              | 3.83(-5.07,12.72)  |
| 24 | IM TE 125 mg/wk              |                              | 1.08(-11.31,13.34) |
| 25 | IM TE 150 mg/2wk             |                              | 7.02(-3.93,18.04)  |
| 26 | IM TE 200 mg/2wk             |                              | 4.99(-3.53,13.53)  |
| 27 | IM TE 250 mg/3wk             |                              | 2.65(-6.16,11.47)  |
| 28 | IM TE 300 mg/3wk             |                              | 12.57(1.68,23.38)  |
| 29 | IM TE 50-400 mg/1-2 wk       |                              | 9.06(-3.94,21.88)  |
| 30 | IM TC 200 mg/2 wk            |                              | -2.49(-13.64,8.66) |
| 31 | IM TC 200 mg/4 wk            |                              | -4.39(-14.76,6.03) |
| 32 | IM TC 250 mg/2wk             |                              | 4.05(-6.43,14.57)  |
| 33 | Durateston, IM, 250 mg/4wk   |                              | -4.02(-14.52,6.43) |
| 34 | IM TU 1000 mg/9 wk           | Testosterone pellets 1200 mg | 13.55(3.98,23.17)  |
| 35 | IM TU 1000 mg/10 wk          |                              | 2.93(-5.76,11.79)  |
| 36 | IM TU 1000 mg/12 wk          |                              | 5.68(-1.39,12.77)  |
| 37 | IM TE 100 mg/wk              |                              | 6.75(-1.86,15.41)  |
| 38 | IM TE 125 mg/wk              |                              | 3.99(-8.13,16.03)  |
| 39 | IM TE 150 mg/2wk             |                              | 9.93(-0.73,20.72)  |
| 40 | IM TE 200 mg/2wk             |                              | 7.90(-0.28,16.12)  |
| 41 | IM TE 250 mg/3wk             |                              | 5.56(-0.16,11.31)  |
| 42 | IM TE 300 mg/3wk             |                              | 15.48(4.84,26.11)  |

|    |                            |                     |                      |
|----|----------------------------|---------------------|----------------------|
| 1  |                            |                     |                      |
| 2  |                            |                     |                      |
| 3  | IM TE 50-400 mg/1-2 wk     |                     | 11.97(-0.87,24.56)   |
| 4  | IM TC 200 mg/2 wk          |                     | 0.43(-10.60,11.33)   |
| 5  | IM TC 200 mg/4 wk          |                     | -1.48(-11.65,8.68)   |
| 6  |                            |                     |                      |
| 7  | IM TC 250 mg/2wk           |                     | 6.96(-3.27,17.22)    |
| 8  | Durateston, IM, 250 mg/4wk |                     | -1.10(-11.31,9.12)   |
| 9  |                            |                     |                      |
| 10 | IM TU 1000 mg/10 wk        | IM TU 1000 mg/9 wk  | -10.62(-21.47,0.34)  |
| 11 | IM TU 1000 mg/12 wk        |                     | -7.87(-17.42,1.71)   |
| 12 | IM TE 100 mg/wk            |                     | -6.80(-17.58,3.97)   |
| 13 | IM TE 125 mg/wk            |                     | -9.56(-23.43,4.23)   |
| 14 | IM TE 150 mg/2wk           |                     | -3.61(-16.13,8.87)   |
| 15 | IM TE 200 mg/2wk           |                     | -5.65(-16.09,4.77)   |
| 16 | IM TE 250 mg/3wk           |                     | -7.99(-15.63,-0.43)  |
| 17 | IM TE 300 mg/3wk           |                     | 1.94(-10.58,14.38)   |
| 18 |                            |                     |                      |
| 19 |                            |                     |                      |
| 20 | IM TE 50-400 mg/1-2 wk     |                     | -1.57(-15.93,12.57)  |
| 21 | IM TC 200 mg/2 wk          |                     | -13.12(-25.76,-0.50) |
| 22 | IM TC 200 mg/4 wk          |                     | -15.02(-27.02,-2.97) |
| 23 |                            |                     |                      |
| 24 | IM TC 250 mg/2wk           |                     | -6.59(-18.64,5.51)   |
| 25 | Durateston, IM, 250 mg/4wk |                     | -14.65(-26.65,-2.55) |
| 26 |                            |                     |                      |
| 27 | IM TU 1000 mg/12 wk        | IM TU 1000 mg/10 wk | 2.75(-3.39,8.87)     |
| 28 | IM TE 100 mg/wk            |                     | 3.82(-4.02,11.63)    |
| 29 | IM TE 125 mg/wk            |                     | 1.06(-10.55,12.59)   |
| 30 | IM TE 150 mg/2wk           |                     | 7.00(-3.13,17.12)    |
| 31 | IM TE 200 mg/2wk           |                     | 4.97(-2.38,12.33)    |
| 32 | IM TE 250 mg/3wk           |                     | 2.63(-5.20,10.43)    |
| 33 | IM TE 300 mg/3wk           |                     | 12.55(2.61,22.50)    |
| 34 |                            |                     |                      |
| 35 | IM TE 50-400 mg/1-2 wk     |                     | 9.04(-3.15,21.15)    |
| 36 | IM TC 200 mg/2 wk          |                     | -2.51(-12.86,7.88)   |
| 37 | IM TC 200 mg/4 wk          |                     | -4.41(-13.89,5.12)   |
| 38 |                            |                     |                      |
| 39 | IM TC 250 mg/2wk           |                     | 4.03(-5.67,13.61)    |
| 40 | Durateston, IM, 250 mg/4wk |                     | -4.03(-13.63,5.52)   |
| 41 |                            |                     |                      |
| 42 | IM TE 100 mg/wk            | IM TU 1000 mg/12 wk | 1.07(-4.91,7.00)     |
| 43 | IM TE 125 mg/wk            |                     | -1.69(-12.18,8.70)   |
| 44 | IM TE 150 mg/2wk           |                     | 4.25(-4.40,13.04)    |
| 45 | IM TE 200 mg/2wk           |                     | 2.22(-3.10,7.50)     |
| 46 | IM TE 250 mg/3wk           |                     | -0.12(-5.92,5.72)    |
| 47 | IM TE 300 mg/3wk           |                     | 9.80(1.20,18.32)     |
| 48 |                            |                     |                      |
| 49 | IM TE 50-400 mg/1-2 wk     |                     | 6.29(-4.89,17.26)    |
| 50 | IM TC 200 mg/2 wk          |                     | -5.26(-14.26,3.76)   |
| 51 | IM TC 200 mg/4 wk          |                     | -7.16(-14.34,0.12)   |
| 52 | IM TC 250 mg/2wk           |                     | 1.28(-6.89,9.44)     |
| 53 | Durateston, IM, 250 mg/4wk |                     | -6.78(-14.19,0.56)   |
| 54 |                            |                     |                      |
| 55 | IM TE 125 mg/wk            | IM TE 100 mg/wk     | -2.76(-14.21,8.71)   |
| 56 |                            |                     |                      |
| 57 |                            |                     |                      |
| 58 |                            |                     |                      |
| 59 |                            |                     |                      |
| 60 |                            |                     |                      |

|    |                            |                  |                      |
|----|----------------------------|------------------|----------------------|
| 1  | IM TE 150 mg/2wk           |                  | 3.19(-6.80,13.17)    |
| 2  | IM TE 200 mg/2wk           |                  | 1.15(-6.03,8.28)     |
| 3  | IM TE 250 mg/3wk           |                  | -1.19(-8.76,6.47)    |
| 4  | IM TE 300 mg/3wk           |                  | 8.74(-1.14,18.58)    |
| 5  | IM TE 50-400 mg/1-2 wk     |                  | 5.22(-6.94,17.26)    |
| 6  | IM TC 200 mg/2 wk          |                  | -6.32(-16.59,3.99)   |
| 7  | IM TC 200 mg/4 wk          |                  | -8.22(-17.53,1.14)   |
| 8  | IM TC 250 mg/2wk           |                  | 0.21(-9.33,9.74)     |
| 9  | Durateston, IM, 250 mg/4wk |                  | -7.85(-17.40,1.61)   |
| 10 | IM TE 150 mg/2wk           | IM TE 125 mg/wk  | 5.95(-7.16,19.13)    |
| 11 | IM TE 200 mg/2wk           |                  | 3.91(-7.29,15.04)    |
| 12 | IM TE 250 mg/3wk           |                  | 1.57(-9.82,13.12)    |
| 13 | IM TE 300 mg/3wk           |                  | 11.50(-1.54,24.55)   |
| 14 | IM TE 50-400 mg/1-2 wk     |                  | 7.98(-6.80,22.76)    |
| 15 | IM TC 200 mg/2 wk          |                  | -3.56(-16.94,9.75)   |
| 16 | IM TC 200 mg/4 wk          |                  | -5.47(-18.14,7.27)   |
| 17 | IM TC 250 mg/2wk           |                  | 2.97(-9.79,15.85)    |
| 18 | Durateston, IM, 250 mg/4wk |                  | -5.09(-17.80,7.77)   |
| 19 | IM TE 200 mg/2wk           | IM TE 150 mg/2wk | -2.04(-11.66,7.57)   |
| 20 | IM TE 250 mg/3wk           |                  | -4.38(-14.31,5.56)   |
| 21 | IM TE 300 mg/3wk           |                  | 5.55(-6.15,17.34)    |
| 22 | IM TE 50-400 mg/1-2 wk     |                  | 2.04(-11.74,15.72)   |
| 23 | IM TC 200 mg/2 wk          |                  | -9.51(-21.66,2.54)   |
| 24 | IM TC 200 mg/4 wk          |                  | -11.41(-22.70,0.00)  |
| 25 | IM TC 250 mg/2wk           |                  | -2.98(-14.42,8.45)   |
| 26 | Durateston, IM, 250 mg/4wk |                  | -11.04(-22.52,0.42)  |
| 27 | IM TE 250 mg/3wk           | IM TE 200 mg/2wk | -2.34(-9.48,4.87)    |
| 28 | IM TE 300 mg/3wk           |                  | 7.59(-1.89,17.04)    |
| 29 | IM TE 50-400 mg/1-2 wk     |                  | 4.07(-7.82,15.86)    |
| 30 | IM TC 200 mg/2 wk          |                  | -7.47(-17.31,2.38)   |
| 31 | IM TC 200 mg/4 wk          |                  | -9.37(-18.42,-0.35)  |
| 32 | IM TC 250 mg/2wk           |                  | -0.94(-9.99,8.19)    |
| 33 | Durateston, IM, 250 mg/4wk |                  | -9.00(-18.14,0.03)   |
| 34 | IM TE 300 mg/3wk           | IM TE 250 mg/3wk | 9.93(0.08,19.73)     |
| 35 | IM TE 50-400 mg/1-2 wk     |                  | 6.41(-5.72,18.40)    |
| 36 | IM TC 200 mg/2 wk          |                  | -5.13(-15.34,5.05)   |
| 37 | IM TC 200 mg/4 wk          |                  | -7.04(-16.28,2.31)   |
| 38 | IM TC 250 mg/2wk           |                  | 1.40(-8.03,10.77)    |
| 39 | Durateston, IM, 250 mg/4wk |                  | -6.66(-16.10,2.75)   |
| 40 | IM TE 50-400 mg/1-2 wk     | IM TE 300 mg/3wk | -3.51(-17.11,9.98)   |
| 41 | IM TC 200 mg/2 wk          |                  | -15.06(-26.99,-3.12) |
| 42 | IM TC 200 mg/4 wk          |                  | -16.96(-28.18,-5.70) |



|    |                            |                        |                      |
|----|----------------------------|------------------------|----------------------|
| 1  | IM TC 250 mg/2wk           |                        | -8.53(-19.81,2.78)   |
| 2  | Durateston, IM, 250 mg/4wk |                        | -16.59(-27.91,-5.27) |
| 3  | IM TC 200 mg/2 wk          | IM TE 50-400 mg/1-2 wk | -11.55(-25.33,2.34)  |
| 4  | IM TC 200 mg/4 wk          |                        | -13.45(-26.71,-0.08) |
| 5  | IM TC 250 mg/2wk           |                        | -5.01(-18.35,8.45)   |
| 6  | Durateston, IM, 250 mg/4wk |                        | -13.07(-26.35,0.29)  |
| 7  | IM TC 200 mg/4 wk          | IM TC 200 mg/2 wk      | -1.90(-13.46,9.66)   |
| 8  | IM TC 250 mg/2wk           |                        | 6.53(-5.16,18.17)    |
| 9  | Durateston, IM, 250 mg/4wk |                        | -1.53(-13.18,10.07)  |
| 10 | IM TC 250 mg/2wk           | IM TC 200 mg/4 wk      | 8.44(-2.47,19.30)    |
| 11 | Durateston, IM, 250 mg/4wk |                        | 0.37(-6.93,7.65)     |
| 12 | Durateston, IM, 250 mg/4wk | IM TC 250 mg/2wk       | -8.06(-19.21,2.97)   |

**eFigure 6: Odds of myocardial infarction associated with the use of any testosterone v. placebo**

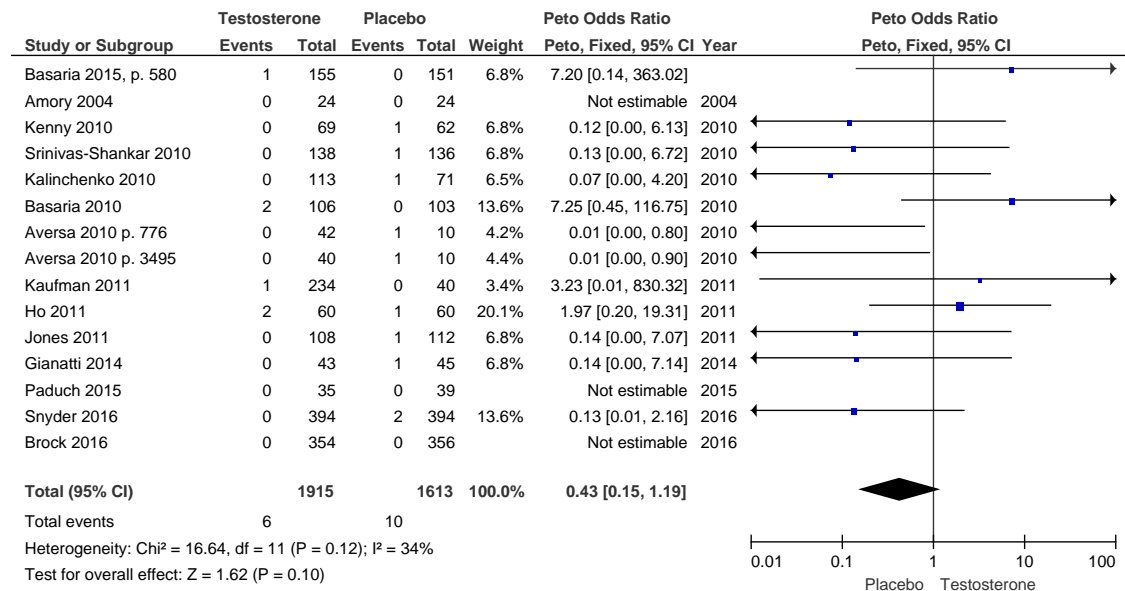

**eFigure 7: Odds of prostate cancer associated with the use of any testosterone v. placebo**

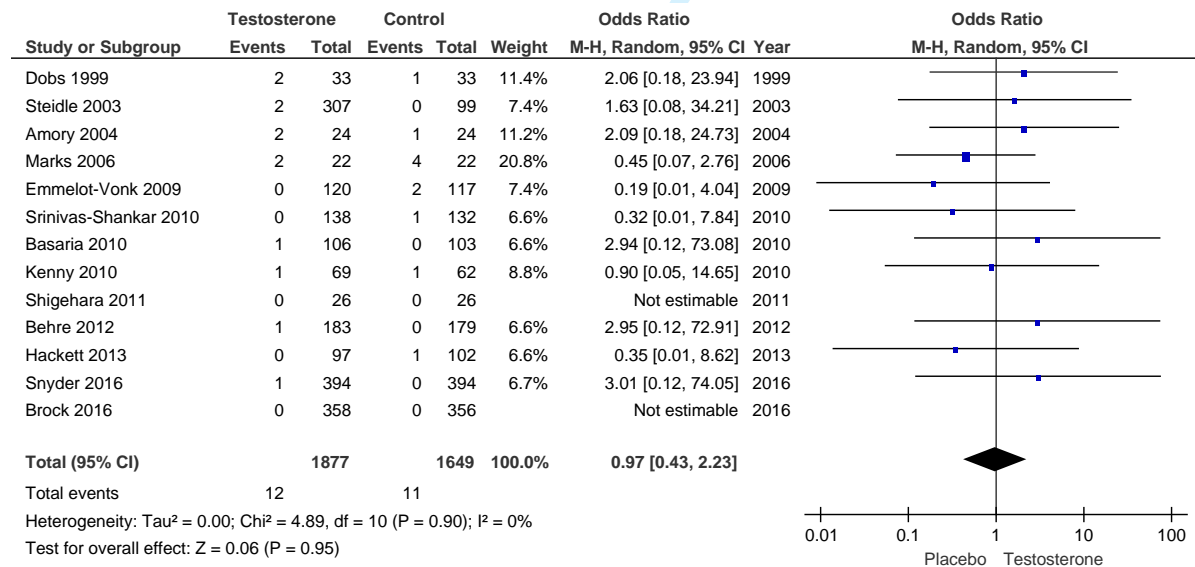

eFigure 8: Odds of serious adverse events: any testosterone v. placebo

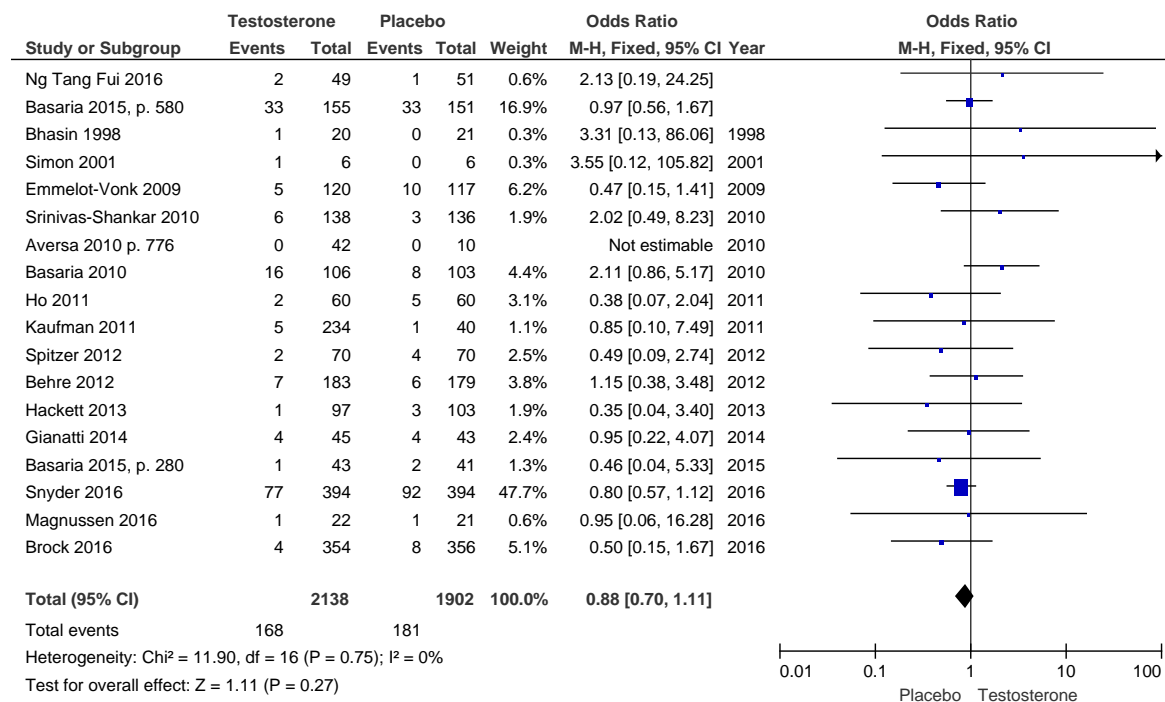

eTable 11: Odds of serious adverse events associated with individual testosterone products – Bayesian network meta-analysis

|                                 | Odds ratio (95% credible interval)* |                      |                      |                      |                         |                         |                      |                         |
|---------------------------------|-------------------------------------|----------------------|----------------------|----------------------|-------------------------|-------------------------|----------------------|-------------------------|
|                                 | Placebo                             | Gel 1%,<br>50 mg/d   | Gel 1%,<br>75 mg/d   | Gel 1%,<br>100 mg/d  | Gel 1.62%,<br>40.5 mg/d | Solution 2%,<br>60 mg/d | Oral TU, 160<br>mg/d | IM TU,<br>1000 mg/12 wk |
| <b>Gel 1%,<br/>50 mg/d</b>      | 0.91<br>(0.46,2.10)                 | —                    |                      |                      |                         |                         |                      |                         |
| <b>Gel 1%,<br/>75 mg/d</b>      | 0.98<br>(0.25,3.55)                 | 1.08<br>(0.21,4.42)  | —                    |                      |                         |                         |                      |                         |
| <b>Gel 1%,<br/>100 mg/d</b>     | 1.41<br>(0.39,4.06)                 | 1.54<br>(0.31,5.25)  | 1.45<br>(0.23,7.53)  | —                    |                         |                         |                      |                         |
| <b>Gel 1.62%,<br/>40.5 mg/d</b> | 1.19<br>(0.11,40.82)                | 1.30<br>(0.10,48.76) | 1.24<br>(0.09,51.17) | 0.89<br>(0.07,35.34) | —                       |                         |                      |                         |
| <b>Solution 2%,<br/>60mg/d</b>  | 0.47<br>(0.08,2.53)                 | 0.51<br>(0.07,3.07)  | 0.48<br>(0.06,4.08)  | 0.34<br>(0.04,2.88)  | 0.38<br>(0.01,7.32)     | —                       |                      |                         |
| <b>Oral TU<br/>160 mg/d</b>     | 0.45<br>(0.08,2.17)                 | 0.49<br>(0.07,2.67)  | 0.46<br>(0.05,3.60)  | 0.32<br>(0.05,2.51)  | 0.36<br>(0.01,6.21)     | 0.94<br>(0.09,10.03)    | —                    |                         |
| <b>IM TU,1000<br/>mg/12 wk</b>  | 0.68<br>(0.23,1.94)                 | 0.74<br>(0.18,2.56)  | 0.69<br>(0.13,3.70)  | 0.48<br>(0.11,2.55)  | 0.56<br>(0.01,7.68)     | 1.43<br>(0.20,11.31)    | 1.50<br>(0.23,10.76) | —                       |

Note: IM = intramuscular injection, TU = testosterone undecanoate.

\*Random effects model. Significant changes are indicated by use of bold and colour (green indicates that the row treatment treatment is significantly better than the column treatment, while red indicates that the row treatment is significantly worse than the column treatment). White indicates no significant difference between treatments. An additional 4 RCTs (Aversa 2010; Schubert 2004; Bhasin 1998; Simon 2001) could not be included in the network because they reported zero events in ≥ treatment groups.

**eFigure 9: Odds of stroke associated with the use of any testosterone v. placebo**

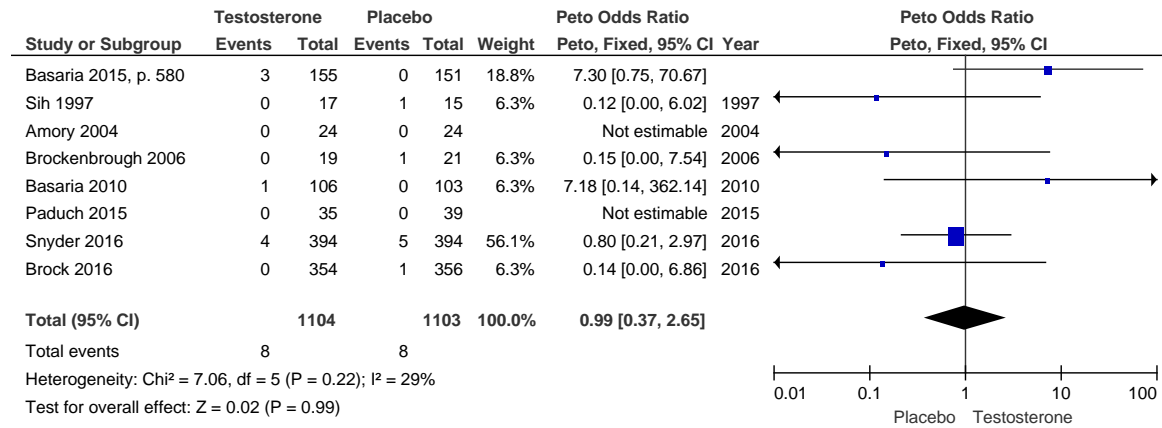

**eFigure 10: Odds of heart disease associated with the use of any testosterone v. placebo**

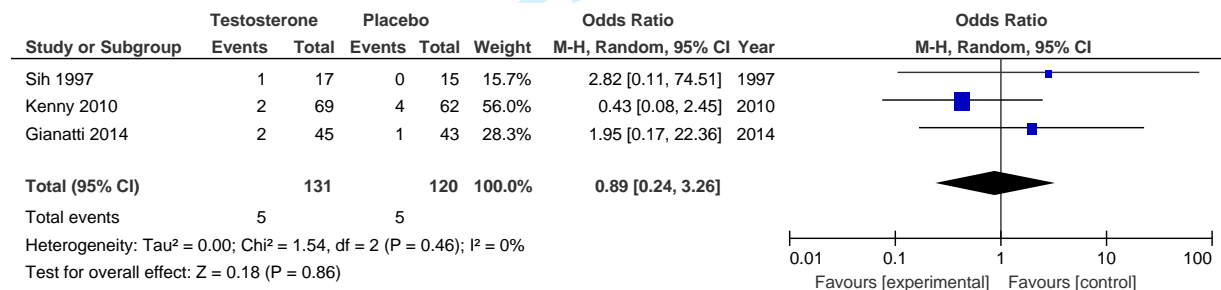

**eFigure 11: Odds of erythrocytosis associated with the use of any testosterone v. placebo**

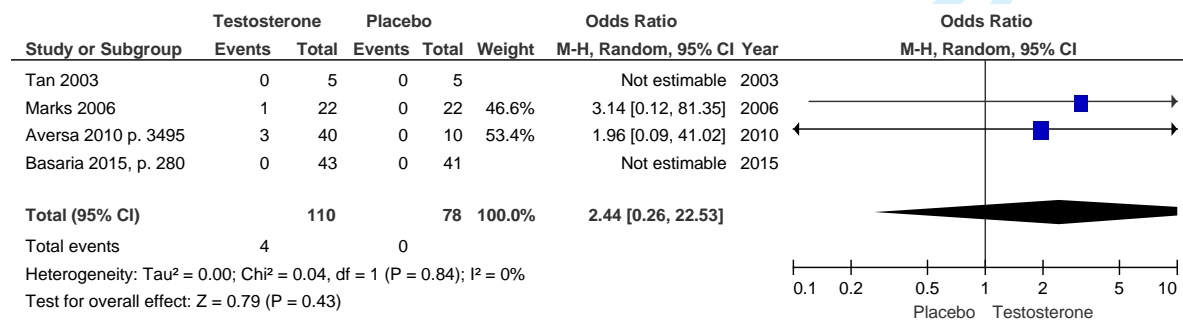

eFigure 12: Odds of withdrawals due to adverse events associated with the use of any testosterone v. placebo

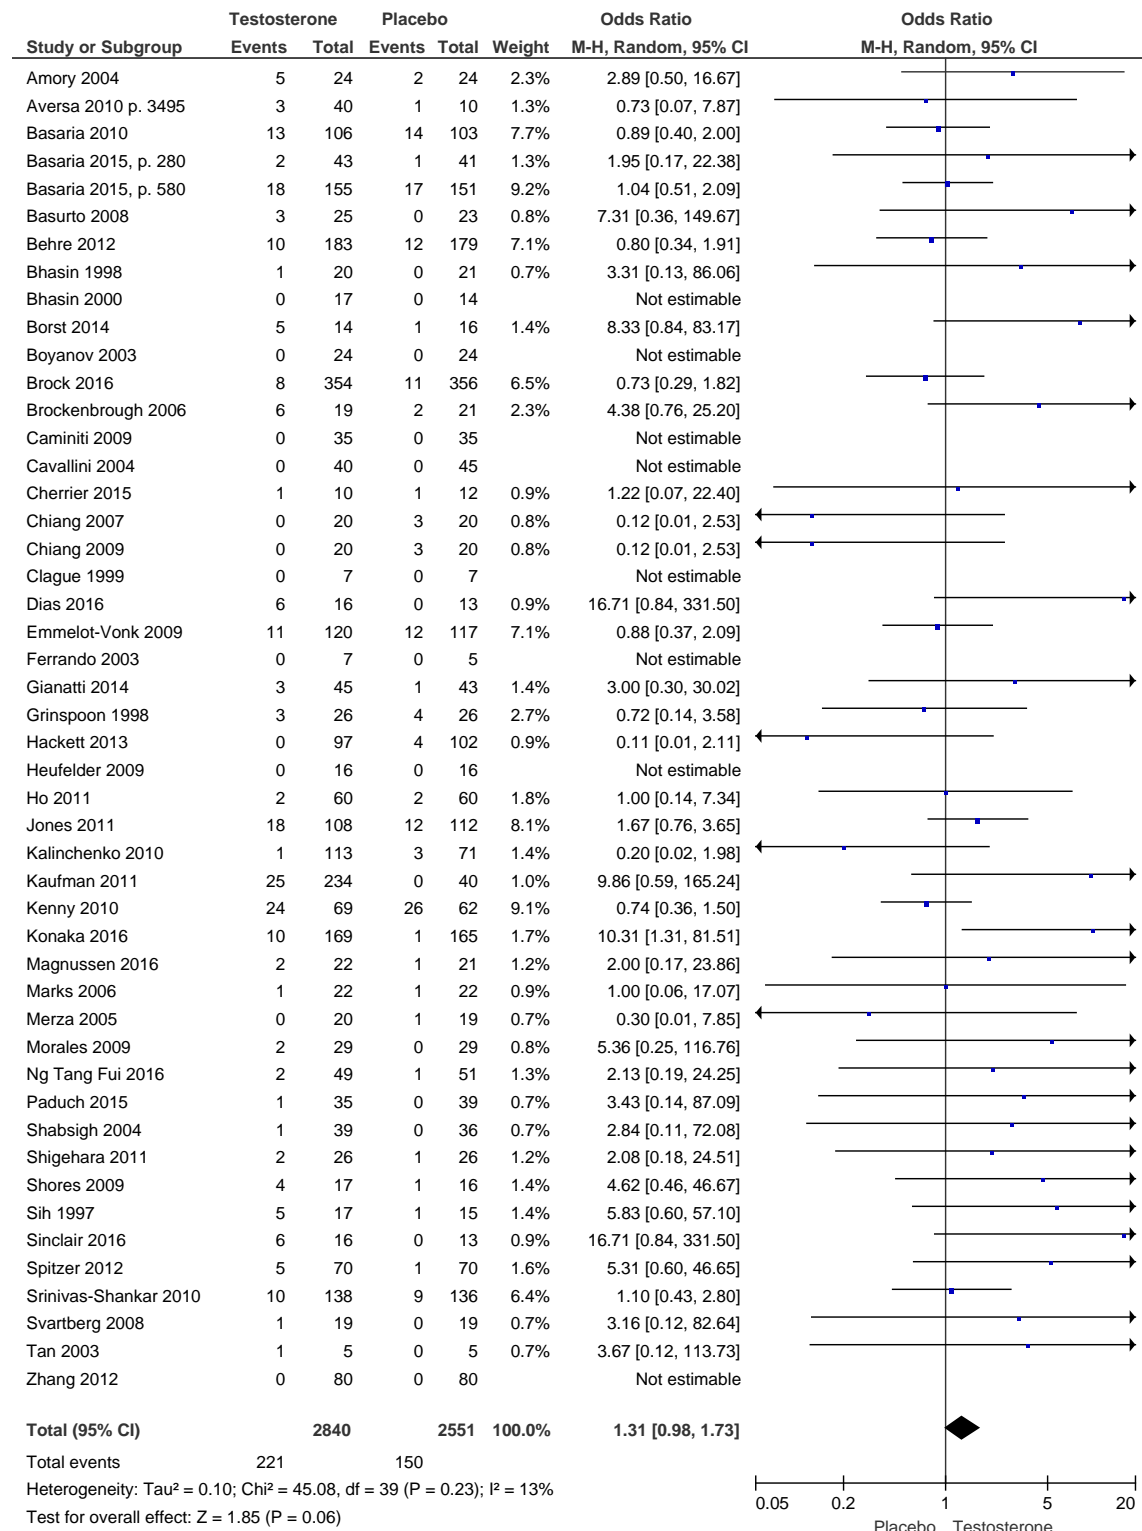

**eTable 12: Odds of withdrawals due to adverse events associated with individual testosterone products – Bayesian network meta-analysis**

|                      | Odds ratio (95% credible interval)* |                    |                      |                    |                    |                     |                    |                      |                     |                      |                      |                  |                    |                    |                    |                    |                    |
|----------------------|-------------------------------------|--------------------|----------------------|--------------------|--------------------|---------------------|--------------------|----------------------|---------------------|----------------------|----------------------|------------------|--------------------|--------------------|--------------------|--------------------|--------------------|
|                      | Placebo                             | Patch, 5 mg/d      | Gel 1%, 5 mg/d       | Gel 1%, 50 mg/d    | Gel 1%, 75 mg/d    | Gel 1%, 100 mg/d    | Gel 2%, 60 mg/d    | Solution 2%, 60 mg/d | Oral TU 160 mg/d    | IM TU, 1000 mg/10 wk | IM TU, 1000 mg/12 wk | IM TE, 125 mg/wk | IM TE, 150 mg/2 wk | IM TE, 200 mg/2 wk | IM TE, 250 mg/4 wk | IM TE, 300 mg/3 wk | IM TC, 200 mg/2 wk |
| Patch, 5 mg/d        | 6.82 (1.66, 32.14)                  | —                  |                      |                    |                    |                     |                    |                      |                     |                      |                      |                  |                    |                    |                    |                    |                    |
| Gel 1%, 5 mg/d       | 0.76 (0.27, 2.14)                   | 0.11 (0.02, 0.63)  | —                    |                    |                    |                     |                    |                      |                     |                      |                      |                  |                    |                    |                    |                    |                    |
| Gel 1%, 50 mg/d      | 1.45 (0.77, 3.00)                   | 0.21 (0.05, 0.86)  | 1.91 (0.59, 6.89)    | —                  |                    |                     |                    |                      |                     |                      |                      |                  |                    |                    |                    |                    |                    |
| Gel 1%, 75 mg/d      | 1.30 (0.55, 3.57)                   | 0.19 (0.03, 1.07)  | 1.71 (0.46, 7.48)    | 0.90 (0.29, 2.85)  | —                  |                     |                    |                      |                     |                      |                      |                  |                    |                    |                    |                    |                    |
| Gel 1%, 100 mg/d     | 1.03 (0.45, 2.40)                   | 0.15 (0.03, 0.64)  | 1.36 (0.37, 5.19)    | 0.71 (0.25, 1.90)  | 0.79 (0.22, 2.61)  | —                   |                    |                      |                     |                      |                      |                  |                    |                    |                    |                    |                    |
| Solution 2%, 60 mg/d | 1.64 (0.57, 4.95)                   | 0.24 (0.04, 1.42)  | 2.18 (0.50, 9.67)    | 1.14 (0.30, 3.98)  | 1.26 (0.28, 4.94)  | 1.60 (0.40, 6.12)   | —                  |                      |                     |                      |                      |                  |                    |                    |                    |                    |                    |
| Gel 2%, 60 mg/d      | 0.73 (0.21, 2.37)                   | 0.11 (0.01, 0.67)  | 0.96 (0.19, 4.68)    | 0.50 (0.12, 1.88)  | 0.56 (0.11, 2.35)  | 0.70 (0.16, 2.93)   | 0.44 (0.08, 2.23)  | —                    |                     |                      |                      |                  |                    |                    |                    |                    |                    |
| Oral TU 160 mg/d     | 0.87 (0.28, 2.77)                   | 0.13 (0.02, 0.80)  | 1.15 (0.25, 5.43)    | 0.60 (0.15, 2.23)  | 0.67 (0.14, 2.77)  | 0.84 (0.20, 3.54)   | 0.53 (0.11, 2.61)  | 1.20 (0.23, 6.61)    | —                   |                      |                      |                  |                    |                    |                    |                    |                    |
| IM TU, 1000 mg/10 wk | 2.14 (0.18, 33.83)                  | 0.31 (0.02, 7.21)  | 2.85 (0.20, 53.28)   | 1.48 (0.11, 24.89) | 1.64 (0.12, 28.93) | 2.08 (0.16, 37.59)  | 1.29 (0.09, 25.16) | 2.95 (0.20, 59.09)   | 2.47 (0.17, 49.97)  | —                    |                      |                  |                    |                    |                    |                    |                    |
| IM TU, 1000 mg/12 wk | 0.52 (0.21, 1.26)                   | 0.08 (0.01, 0.40)  | 0.69 (0.17, 2.72)    | 0.36 (0.11, 1.05)  | 0.40 (0.10, 1.36)  | 0.50 (0.15, 1.68)   | 0.31 (0.08, 1.28)  | 0.72 (0.16, 3.21)    | 0.59 (0.14, 2.52)   | 0.24 (0.01, 3.42)    | —                    |                  |                    |                    |                    |                    |                    |
| IM TE, 125 mg/wk     | 7.95 (0.97, 105.20)                 | 1.20 (0.09, 22.88) | 10.65 (1.03, 166.10) | 5.47 (0.60, 77.02) | 6.08 (0.60, 90.45) | 7.72 (0.80, 115.20) | 4.89 (0.44, 78.95) | 11.35 (1.01, 179.70) | 9.32 (0.83, 152.60) | 3.88 (0.11, 140.30)  | 15.62 (1.59, 244.70) | —                |                    |                    |                    |                    |                    |

Supplemental Online Content: Elliott et al. Testosterone therapy in hypogonadal men: a systematic review and network meta-analysis.

For peer review only - <http://bmjopen.bmj.com/site/about/guidelines.xhtml>

|                           |                          |                                              |                                               |                          |                          |                                               |                          |                                               |                                               |                          |                                                 |                          |                           |                          |                          |                           |   |
|---------------------------|--------------------------|----------------------------------------------|-----------------------------------------------|--------------------------|--------------------------|-----------------------------------------------|--------------------------|-----------------------------------------------|-----------------------------------------------|--------------------------|-------------------------------------------------|--------------------------|---------------------------|--------------------------|--------------------------|---------------------------|---|
| IM TE,<br>150 mg/<br>2 wk | 1.01<br>(0.04,<br>22.84) | 0.15<br>(0.00,<br>4.20)                      | 1.34<br>(0.05,<br>34.59)                      | 0.70<br>(0.03,<br>16.50) | 0.77<br>(0.03,<br>18.63) | 0.97<br>(0.04,<br>24.53)                      | 0.62<br>(0.02,<br>17.03) | 1.39<br>(0.05,<br>39.21)                      | 1.16<br>(0.05,<br>33.97)                      | 0.46<br>(0.01,<br>25.13) | 1.95<br>(0.08,<br>49.97)                        | 0.12<br>(0.00,<br>4.99)  | —                         |                          |                          |                           |   |
| IM TE,<br>200 mg/<br>2 wk | 2.83<br>(0.49,<br>21.73) | 0.42<br>(0.04,<br>4.94)                      | 3.78<br>(0.49,<br>36.13)                      | 1.96<br>(0.29,<br>16.21) | 2.17<br>(0.28,<br>19.79) | 2.73<br>(0.39,<br>24.40)                      | 1.73<br>(0.22,<br>17.02) | 3.93<br>(0.48,<br>41.61)                      | 3.26<br>(0.40,<br>32.63)                      | 1.38<br>(0.05,<br>28.67) | 5.50<br>(0.74,<br>50.37)                        | 0.35<br>(0.02,<br>6.55)  | 2.92<br>(0.08,<br>107.60) | —                        |                          |                           |   |
| IM TE,<br>250 mg/<br>4 wk | 5.92<br>(1.43,<br>36.28) | 0.89<br>(0.10,<br>8.37)                      | <b>8.05</b><br><b>(1.33,</b><br><b>61.53)</b> | 4.12<br>(0.82,<br>27.64) | 4.61<br>(0.77,<br>32.91) | <b>5.81</b><br><b>(1.08,</b><br><b>41.07)</b> | 3.66<br>(0.59,<br>29.86) | <b>8.31</b><br><b>(1.27,</b><br><b>72.32)</b> | <b>6.95</b><br><b>(1.08,</b><br><b>57.31)</b> | 2.88<br>(0.11,<br>57.41) | 11.75<br>(2.13,<br>84.99)                       | 0.75<br>(0.04,<br>11.64) | 6.10<br>(0.20,<br>202.50) | 2.15<br>(0.18,<br>25.19) | —                        |                           |   |
| IM TE,<br>300 mg/<br>3 wk | 0.72<br>(0.11,<br>4.20)  | <b>0.10</b><br><b>(0.01,</b><br><b>0.99)</b> | 0.93<br>(0.11,<br>7.44)                       | 0.49<br>(0.06,<br>3.19)  | 0.54<br>(0.07,<br>3.89)  | 0.69<br>(0.09,<br>4.94)                       | 0.43<br>(0.05,<br>3.45)  | 0.98<br>(0.10,<br>8.51)                       | 0.82<br>(0.09,<br>7.04)                       | 0.33<br>(0.01,<br>6.96)  | 1.38<br>(0.18,<br>10.17)                        | 0.09<br>(0.00,<br>1.40)  | 0.71<br>(0.02,<br>23.91)  | 0.24<br>(0.02,<br>2.99)  | 0.12<br>(0.01,<br>1.18)  | —                         |   |
| IM TC,<br>200 mg/<br>2 wk | 5.77<br>(0.72,<br>76.47) | 0.85<br>(0.06,<br>15.32)                     | 7.73<br>(0.72,<br>116.20)                     | 3.98<br>(0.43,<br>54.25) | 4.37<br>(0.43,<br>64.41) | 5.53<br>(0.60,<br>78.93)                      | 3.52<br>(0.33,<br>54.96) | 8.03<br>(0.71,<br>131.40)                     | 6.60<br>(0.62,<br>104.30)                     | 2.73<br>(0.09,<br>84.03) | <b>11.06</b><br><b>(1.15,</b><br><b>170.30)</b> | 0.72<br>(0.03,<br>19.57) | 5.92<br>(0.14,<br>282.40) | 2.07<br>(0.10,<br>43.57) | 0.95<br>(0.06,<br>17.27) | 8.60<br>(0.51,<br>180.50) | — |

Note: IM = intramuscular injection, TC = testosterone cypionate, TE = testosterone enanthate, TU = testosterone undecanoate.

\*Random-effects model. Significant changes are indicated by use of bold and colour (green indicates that the row treatment treatment is significantly better than the column treatment, which red indicates that the row treatment is significantly worse than the column treatment). White indicates no significant difference between treatments. An additional 23 studies (Basurto 2008, Bhasin 1998 (p. 140), Bhasin 1998 (p. 3155), Boyanov 2003, Caminiti 2009, Cavallini 2004, Chiang 2007, Chiang 2009, Clague 1999, Dobs 1999, Ferrando 2003, Hackett 2013, Heufelder 2009, Kaufman 2011, Merza 2005, Morales 2009, Schubert 2004, Shabsigh 2004, Svartberg 2008, Tan 2003, Zhang 2012, Dias 2016, Paduch 2015) were removed from the network meta-analysis because zero events were reported in one or both groups.

eTable 13: Summary of harms outcomes reported in non-randomized studies

| Author, year                | Population                                                      | Treatment (no. in group)                                                                                                                                                                              | Outcome                                                                                                                                                                                                                                                                                | Comments                                                                                                                                                                                            |
|-----------------------------|-----------------------------------------------------------------|-------------------------------------------------------------------------------------------------------------------------------------------------------------------------------------------------------|----------------------------------------------------------------------------------------------------------------------------------------------------------------------------------------------------------------------------------------------------------------------------------------|-----------------------------------------------------------------------------------------------------------------------------------------------------------------------------------------------------|
| <b>Retrospective cohort</b> |                                                                 |                                                                                                                                                                                                       |                                                                                                                                                                                                                                                                                        |                                                                                                                                                                                                     |
| <b>Cheetham 2017</b>        | ≥ 40 yrs with documented androgen deficiency                    | <ul style="list-style-type: none"> <li>• Ever TRT (8,808)</li> <li>• Never TRT (35,527)</li> </ul> Mean follow-up: 4.4 years (median 3.4 years, IQR, 1.7-6.5 years)                                   | <ul style="list-style-type: none"> <li>• Stroke: AHR 0.64 (95% CI 0.52, 0.80)</li> <li>• Acute MI: AHR 0.74 (95% CI 0.63, 0.86)</li> <li>• CVD: AHR 0.76 (95% CI 0.61, 0.93)</li> </ul>                                                                                                | Entry into cohort was based on filling a prescription for TRT (patch 13.6%, gel 34.7%, injectable 51.6%).                                                                                           |
| <b>Layton 2015</b>          | New users of TRT*                                               | <ul style="list-style-type: none"> <li>• Gel (109,810)</li> <li>• Injection (103,555)</li> <li>• Patch (9,255)</li> </ul> Mean treatment duration between 96 days (patch) and 122 days (injection)    | Injection v. gel <ul style="list-style-type: none"> <li>• MI: AHR 1.64 (95% CI 0.57 to 4.69)</li> <li>• Stroke: AHR 1.28 (0.27, 6.02)</li> </ul>                                                                                                                                       | No significant difference in MI or stroke between injection and gel users. No data available for patch v. injection or gel users.                                                                   |
| <b>Pastuszak 2015</b>       | New TRT users or had been off TRT for ≥ 3 or mo                 | <ul style="list-style-type: none"> <li>• Gel (1% 50–100mg/d or 1.62% 20.25–80.1 mg/d) (47)</li> <li>• IM TE or TC, 100–200mg/wk (57)</li> <li>• Pellets (75mg/3–6 mo) (74)</li> </ul> Duration: 36 mo | <ul style="list-style-type: none"> <li>• Erythrocytosis: Gel: 12.8% of patients Injection: T 66.7% Pellets: 35.1%</li> <li>• Prostate cancer: 1 case of prostate cancer diagnosed in pellet group. No new cases of prostate cancer among men with previous prostate cancer.</li> </ul> | Erythrocytosis defined as hematocrit ≥50%; Erythrocytosis occurred significantly earlier in the injection group (10.5±9.1 mo) compared with the gel (14.0±12.6 mo) or pellet (16.4 ±10.7mo) groups. |
| <b>Ramasamy 2015</b>        | ≥ 65 yr and ≥3 hypogonadal symptoms                             | <ul style="list-style-type: none"> <li>• TRT, dose NR (153)</li> <li>• No TRT, dose NR (64)</li> </ul> Duration: Median follow-up 3.8 (TRT) v. 3.4 yr (TRT)                                           | <ul style="list-style-type: none"> <li>• MI: 1 event in TRT group v. 0 in no TRT group</li> <li>• Stroke: 2 events in TRT v. 1 in no TRT group</li> </ul>                                                                                                                              | All events (except 1 death which took place after 6 months of follow-up) occurred after 2 or more years.                                                                                            |
| <b>Vigen 2013</b>           | Men who underwent coronary angiography                          | <ul style="list-style-type: none"> <li>• TRT, dose NR (1223)</li> <li>• No treatment (7486)</li> </ul> Mean follow-up: 840 d                                                                          | <ul style="list-style-type: none"> <li>• Cardiovascular events†: AHR 1.29, 95% CI 1.05 to 1.58</li> </ul>                                                                                                                                                                              | Entry into cohort was based on filling a prescription for TRT (patch, gel, injectable; brands NR). Data reported as TRT v. no TRT. Length of follow-up differed by group.                           |
| <b>Shores 2012</b>          | > 40 yr treated at a VA medical center, inpatient or outpatient | <ul style="list-style-type: none"> <li>• No treatment (633)</li> <li>• TRT (398)</li> </ul> Duration: 20.2 mo                                                                                         | <ul style="list-style-type: none"> <li>• Prostate cancer: No treatment: 13/633 men; TRT: 7/398 men</li> </ul>                                                                                                                                                                          | Data reported as TRT v. no TRT. TRTs included injectable, patch, or gel (brands NR)                                                                                                                 |
| <b>Rhoden 2006</b>          | Negative prostate biopsy prior to starting TRT                  | <ul style="list-style-type: none"> <li>• IM testosterone, dose and type NR (33)</li> <li>• Gel 1%, dose NR (25)</li> </ul> Duration: 12 mo                                                            | <ul style="list-style-type: none"> <li>• Prostate cancer: 1 case in the IM group</li> </ul>                                                                                                                                                                                            |                                                                                                                                                                                                     |
| <b>Guay 2000</b>            | Men with ED and primary or secondary hypogonadism               | <ul style="list-style-type: none"> <li>• IM TE, 200–300 mg/2–3 wk (25)</li> <li>• Patch, 5 mg/d (16)</li> </ul>                                                                                       | <ul style="list-style-type: none"> <li>• Prostate cancer: 3 cases (NR which treatment group the patients belonged to)</li> </ul>                                                                                                                                                       |                                                                                                                                                                                                     |

Supplemental Online Content: Elliott et al. Testosterone therapy in hypogonadal men: a systematic review and network meta-analysis.

For peer review only - <http://bmjopen.bmj.com/site/about/guidelines.xhtml>



| Duration: 2–3 mo       |                                                                    |                                                                                                                                                                                        |                                                                                                                                                                                                                                                                                          |                                                                                                                                                                        |
|------------------------|--------------------------------------------------------------------|----------------------------------------------------------------------------------------------------------------------------------------------------------------------------------------|------------------------------------------------------------------------------------------------------------------------------------------------------------------------------------------------------------------------------------------------------------------------------------------|------------------------------------------------------------------------------------------------------------------------------------------------------------------------|
| Prospective cohort     |                                                                    |                                                                                                                                                                                        |                                                                                                                                                                                                                                                                                          |                                                                                                                                                                        |
| <b>Debruyne 2017</b>   | ≥18 yr with a diagnosis of hypogonadism                            | <ul style="list-style-type: none"> <li>• TRT, dose NR (750)</li> <li>• No TRT (249)</li> </ul> Duration: 36 mo (23,900 person-mo)                                                      | <ul style="list-style-type: none"> <li>• Prostate cancer: incidence rate ratio 0.52 (95% CI 0.22 to 1.26)</li> </ul>                                                                                                                                                                     | 68% of TRT users received topical gels, 31% injectables, and 2% oral products                                                                                          |
| <b>Traish 2017</b>     | Symptoms of hypogonadism                                           | <ul style="list-style-type: none"> <li>• TU, 1000mg/12wk (360)</li> <li>• No TRT (296)</li> </ul> Median follow-up: 7 yr                                                               | <ul style="list-style-type: none"> <li>• CVD: 0 in TU group v. 19 in no TRT group</li> <li>• Nonfatal MI: 0 in TU group v. 26 in no TRT group</li> <li>• Nonfatal stroke: 0 in TU group v. 30 in no TRT group</li> <li>• Prostate cancer: 7 in TU group v. 12 in no TRT group</li> </ul> | CVD in no TRT group attributed to MI (5), stroke (4), heart failure (7), thromboembolism (2), lung embolism (1), and pneumonia and lung failure (1)                    |
| <b>Yassin 2017</b>     | Treated or untreated hypogonadal men                               | <ul style="list-style-type: none"> <li>• TRT, dose NR (42)</li> <li>• No treatment (162)</li> </ul> Duration: 6 yr                                                                     | <ul style="list-style-type: none"> <li>• Prostate cancer: 7 (16.7%) in TRT group vs. 84 (51.9%) in untreated group</li> </ul>                                                                                                                                                            | Data reported as a positive biopsy for prostate cancer; lower severity of prostate cancer in terms of staging and grading in the TRT group than in the untreated group |
| <b>Jung 2016</b>       | Symptoms of hypogonadism                                           | <ul style="list-style-type: none"> <li>• TU, 1000 mg/3 mo + lifestyle modification (54)</li> <li>• Lifestyle modify (52)</li> </ul> Treatment duration: 8 mo                           | <ul style="list-style-type: none"> <li>• Prostate cancer: 0 in both groups</li> <li>• MI: 0 in both groups</li> <li>• Stroke: 0 in both groups</li> </ul>                                                                                                                                | Prospective, placebo-controlled study                                                                                                                                  |
| <b>Francomano 2014</b> | Severely obese men (mean BMI 42) with ≥ 2 symptoms of hypogonadism | <ul style="list-style-type: none"> <li>• DPE (12)</li> <li>• DPE + IM TU, 1000 mg/12 wk (12)</li> </ul> Duration: 54 wk + 24 wk observational period following withdrawal of treatment | <ul style="list-style-type: none"> <li>• WAE: zero in both groups</li> <li>• SAE: zero in both groups</li> </ul>                                                                                                                                                                         |                                                                                                                                                                        |
| <b>Aydogdu 2013</b>    | IHH                                                                | <ul style="list-style-type: none"> <li>• Sustanon, 250 mg/3wk (28)</li> <li>• Gel 1%, 50 mg/d (24)</li> </ul> Duration: 24 wk                                                          | <ul style="list-style-type: none"> <li>• SAE: zero in all groups</li> </ul>                                                                                                                                                                                                              |                                                                                                                                                                        |
| <b>Blick 2013</b>      | HIV/AIDS                                                           | <ul style="list-style-type: none"> <li>• Androgel 1%, gel, 50 mg/d (92)</li> <li>• Testim 1%, gel, 50 mg/d (75)</li> </ul> Duration: 12 mo                                             | <ul style="list-style-type: none"> <li>• Erythrocytosis: zero in both groups</li> <li>• Prostate cancer: zero in both groups</li> <li>• WAE: zero in both groups</li> </ul>                                                                                                              |                                                                                                                                                                        |
| <b>Aversa 2012</b>     | Middle-aged men with LOH and MetS                                  | <ul style="list-style-type: none"> <li>• No treatment (20)</li> <li>• IM TU, 12 wk (40)</li> </ul> Duration: 36 mo                                                                     | <ul style="list-style-type: none"> <li>• MI: 1 in control group</li> <li>• Erythrocytosis: 4 in TU group</li> </ul>                                                                                                                                                                      |                                                                                                                                                                        |
| <b>Dean 2005</b>       | 21–81 yr                                                           | <ul style="list-style-type: none"> <li>• Gel 1%, 50 mg/d (NR)</li> <li>• Gel 1%, 100 mg/d (NR)</li> </ul> Total: 371 men<br>Duration: up to 12 mo                                      | <ul style="list-style-type: none"> <li>• Prostate cancer: 3</li> <li>• WAE: 40</li> <li>• SAE: 6</li> </ul>                                                                                                                                                                              | Reported only adverse events “judged related to study medication” and that affected >1% of study population.                                                           |
| <b>Wang</b>            | 19–68 yr                                                           | <ul style="list-style-type: none"> <li>• Gel 1%, 50 mg/d (NR)</li> </ul>                                                                                                               | <ul style="list-style-type: none"> <li>• Prostate cancer: 1 in 75 mg/d group,</li> </ul>                                                                                                                                                                                                 |                                                                                                                                                                        |

Supplemental Online Content: Elliott et al. Testosterone therapy in hypogonadal men: a systematic review and network meta-analysis.

For peer review only - <http://bmjopen.bmj.com/site/about/guidelines.xhtml>

1  
2  
3  
4  
5  
6  
7  
8  
9  
10  
11  
12  
13  
14  
15  
16  
17  
18  
19  
20  
21  
22  
23  
24  
25  
26  
27  
28  
29  
30  
31  
32  
33  
34  
35  
36  
37  
38  
39  
40  
41  
42  
43  
44  
45  
46  
47  
48  
49  
50  
51  
52  
53  
54  
55  
56  
57  
58  
59  
60

|                    |             |                                                                                                                |                                                                                                                                                                                                                                                          |                                                                                  |
|--------------------|-------------|----------------------------------------------------------------------------------------------------------------|----------------------------------------------------------------------------------------------------------------------------------------------------------------------------------------------------------------------------------------------------------|----------------------------------------------------------------------------------|
| <b>2004</b>        |             | <ul style="list-style-type: none"> <li>• Gel 1%, 75 mg/d (NR)</li> <li>• Gel 1%, 100 mg/d (NR)</li> </ul>      | <ul style="list-style-type: none"> <li>2 in 100 mg/d group</li> <li>• Skin reactions: 12 men</li> </ul>                                                                                                                                                  |                                                                                  |
|                    |             | Total: 163 men                                                                                                 |                                                                                                                                                                                                                                                          |                                                                                  |
|                    |             | Duration: 36 mo‡                                                                                               |                                                                                                                                                                                                                                                          |                                                                                  |
| <b>Hajjar 1997</b> | Elderly men | <ul style="list-style-type: none"> <li>• No treatment (27)</li> <li>• IM TE or TC 200mg/2-3 wk (45)</li> </ul> | <ul style="list-style-type: none"> <li>• Myocardial infarction: 1 in TRT group</li> <li>• Stroke: No treatment: 1/23; TRT: 1/26</li> <li>• Diabetes: No treatment: 0/23; TRT: 1/26</li> <li>• Erythrocytosis¶: No treatment: 0/27; TRT: 11/45</li> </ul> | Safety outcomes were reported based on a subset of people assigned to each group |
|                    |             | Duration: at least 2 yr                                                                                        |                                                                                                                                                                                                                                                          |                                                                                  |

Note: AHR = adjusted hazard ratio, DPE = diet plus exercise, ED = erectile dysfunction, IHH = idiopathic hypogonadotropic hypogonadism, IM = intramuscular injection, LOH = late-onset hypogonadism, MetS = metabolic syndrome, MI = myocardial infarction, NR = not reported, SAE = serious adverse event, TC = testosterone cypionate, TE = testosterone enanthate, TU = testosterone undecanoate, TRT = testosterone replacement therapy, T = testosterone, VA = Veterans Affairs, WAE = withdrawal due to adverse events.

\*Data from MarketScan database. Data for these outcomes not reported for the Medicare or United Kingdom’s CPRD databases.

†Composite outcome of all-cause mortality, myocardial infarction, and ischemic stroke. MI, stroke and CV death were also reported separately; however the length of observation time differed between groups.

‡ This study was completed after an initial 6-month randomized study for an additional 36 months; participants had a total of 42 months of gel exposure.

¶Reported as polycythemia for the treatment group. Zero count inferred for the control group.

review only

PRISMA NMA Checklist of Items to Include When Reporting A Systematic Review Involving a Network Meta-analysis

| Section/Topic             | Item # | Checklist Item                                                                                                                                                                                                                                                                                                                                                                                                                                                                                                                                                                                                                                                                                                                                                                          | Reported on Page # |
|---------------------------|--------|-----------------------------------------------------------------------------------------------------------------------------------------------------------------------------------------------------------------------------------------------------------------------------------------------------------------------------------------------------------------------------------------------------------------------------------------------------------------------------------------------------------------------------------------------------------------------------------------------------------------------------------------------------------------------------------------------------------------------------------------------------------------------------------------|--------------------|
| <b>TITLE</b>              |        |                                                                                                                                                                                                                                                                                                                                                                                                                                                                                                                                                                                                                                                                                                                                                                                         |                    |
| Title                     | 1      | Identify the report as a systematic review <i>incorporating a network meta-analysis (or related form of meta-analysis)</i> .                                                                                                                                                                                                                                                                                                                                                                                                                                                                                                                                                                                                                                                            | p. 1               |
| <b>ABSTRACT</b>           |        |                                                                                                                                                                                                                                                                                                                                                                                                                                                                                                                                                                                                                                                                                                                                                                                         |                    |
| Structured summary        | 2      | Provide a structured summary including, as applicable:<br><b>Background:</b> main objectives<br><b>Methods:</b> data sources; study eligibility criteria, participants, and interventions; study appraisal; and <i>synthesis methods, such as network meta-analysis</i> .<br><b>Results:</b> number of studies and participants identified; summary estimates with corresponding confidence/credible intervals; <i>treatment rankings may also be discussed. Authors may choose to summarize pairwise comparisons against a chosen treatment included in their analyses for brevity.</i><br><b>Discussion/Conclusions:</b> limitations; conclusions and implications of findings.<br><b>Other:</b> primary source of funding; systematic review registration number with registry name. | p. 3               |
| <b>INTRODUCTION</b>       |        |                                                                                                                                                                                                                                                                                                                                                                                                                                                                                                                                                                                                                                                                                                                                                                                         |                    |
| Rationale                 | 3      | Describe the rationale for the review in the context of what is already known, <i>including mention of why a network meta-analysis has been conducted.</i>                                                                                                                                                                                                                                                                                                                                                                                                                                                                                                                                                                                                                              | p. 6               |
| Objectives                | 4      | Provide an explicit statement of questions being addressed, with reference to participants, interventions, comparisons, outcomes, and study design (PICOS).                                                                                                                                                                                                                                                                                                                                                                                                                                                                                                                                                                                                                             | p. 6               |
| <b>METHODS</b>            |        |                                                                                                                                                                                                                                                                                                                                                                                                                                                                                                                                                                                                                                                                                                                                                                                         |                    |
| Protocol and registration | 5      | Indicate whether a review protocol exists and if and where it can be accessed (e.g., Web address); and, if available, provide registration information, including registration number.                                                                                                                                                                                                                                                                                                                                                                                                                                                                                                                                                                                                  | p. 2,5,6           |
| Eligibility criteria      | 6      | Specify study characteristics (e.g., PICOS, length of follow-up) and report characteristics (e.g., years considered, language, publication status) used as criteria for eligibility, giving rationale. <i>Clearly describe eligible treatments included in the treatment network, and note whether any have been clustered or merged into the same node (with justification).</i>                                                                                                                                                                                                                                                                                                                                                                                                       | p. 6-7             |
| Information sources       | 7      | Describe all information sources (e.g., databases with dates of coverage, contact with study authors to identify                                                                                                                                                                                                                                                                                                                                                                                                                                                                                                                                                                                                                                                                        | p. 7               |

Elliott et al: Testosterone therapy in hypogonadal men:  
a systematic review and network meta-analysis

For peer review only - <http://bmjopen.bmj.com/site/about/guidelines.xhtml>

|                                        |           |                                                                                                                                                                                                                                                                                                                                                                                                                        |                   |
|----------------------------------------|-----------|------------------------------------------------------------------------------------------------------------------------------------------------------------------------------------------------------------------------------------------------------------------------------------------------------------------------------------------------------------------------------------------------------------------------|-------------------|
|                                        |           | additional studies) in the search and date last searched.                                                                                                                                                                                                                                                                                                                                                              |                   |
| Search                                 | 8         | Present full electronic search strategy for at least one database, including any limits used, such that it could be repeated.                                                                                                                                                                                                                                                                                          | Online supplement |
| Study selection                        | 9         | State the process for selecting studies (i.e., screening, eligibility, included in systematic review, and, if applicable, included in the meta-analysis).                                                                                                                                                                                                                                                              | p. 7              |
| Data collection process                | 10        | Describe method of data extraction from reports (e.g., piloted forms, independently, in duplicate) and any processes for obtaining and confirming data from investigators.                                                                                                                                                                                                                                             | p. 7              |
| Data items                             | 11        | List and define all variables for which data were sought (e.g., PICOS, funding sources) and any assumptions and simplifications made.                                                                                                                                                                                                                                                                                  | p. 8              |
| <b>Geometry of the network</b>         | <b>S1</b> | Describe methods used to explore the geometry of the treatment network under study and potential biases related to it. This should include how the evidence base has been graphically summarized for presentation, and what characteristics were compiled and used to describe the evidence base to readers.                                                                                                           | p. 8-9            |
| Risk of bias within individual studies | 12        | Describe methods used for assessing risk of bias of individual studies (including specification of whether this was done at the study or outcome level), and how this information is to be used in any data synthesis.                                                                                                                                                                                                 | p. 7-8            |
| Summary measures                       | 13        | State the principal summary measures (e.g., risk ratio, difference in means). <i>Also describe the use of additional summary measures assessed, such as treatment rankings and surface under the cumulative ranking curve (SUCRA) values, as well as modified approaches used to present summary findings from meta-analyses.</i>                                                                                      | p. 8-9            |
| Planned methods of analysis            | 14        | Describe the methods of handling data and combining results of studies for each network meta-analysis. This should include, but not be limited to: <ul style="list-style-type: none"> <li>• <i>Handling of multi-arm trials;</i></li> <li>• <i>Selection of variance structure;</i></li> <li>• <i>Selection of prior distributions in Bayesian analyses; and</i></li> <li>• <i>Assessment of model fit.</i></li> </ul> | p. 8-9            |
| <b>Assessment of Inconsistency</b>     | <b>S2</b> | Describe the statistical methods used to evaluate the agreement of direct and indirect evidence in the treatment network(s) studied. Describe efforts taken to address its presence when found.                                                                                                                                                                                                                        | p. 8-9            |
| Risk of bias across studies            | 15        | Specify any assessment of risk of bias that may affect the cumulative evidence (e.g., publication bias, selective reporting within studies).                                                                                                                                                                                                                                                                           | p. 7-8            |
| Additional analyses                    | 16        | Describe methods of additional analyses if done, indicating which were pre-specified. This may include, but not be limited to, the following: <ul style="list-style-type: none"> <li>• Sensitivity or subgroup analyses;</li> <li>• Meta-regression analyses;</li> </ul>                                                                                                                                               | NA                |

- *Alternative formulations of the treatment network; and*
- *Use of alternative prior distributions for Bayesian analyses (if applicable).*

## RESULTS†

|                                          |    |                                                                                                                                                                                                                                                                                                                                                                                                                                                              |                                        |
|------------------------------------------|----|--------------------------------------------------------------------------------------------------------------------------------------------------------------------------------------------------------------------------------------------------------------------------------------------------------------------------------------------------------------------------------------------------------------------------------------------------------------|----------------------------------------|
| Study selection                          | 17 | Give numbers of studies screened, assessed for eligibility, and included in the review, with reasons for exclusions at each stage, ideally with a flow diagram.                                                                                                                                                                                                                                                                                              | p. 10, Figure 1                        |
| <b>Presentation of network structure</b> | S3 | Provide a network graph of the included studies to enable visualization of the geometry of the treatment network.                                                                                                                                                                                                                                                                                                                                            | <b>Fig 3, supplement</b>               |
| <b>Summary of network geometry</b>       | S4 | Provide a brief overview of characteristics of the treatment network. This may include commentary on the abundance of trials and randomized patients for the different interventions and pairwise comparisons in the network, gaps of evidence in the treatment network, and potential biases reflected by the network structure.                                                                                                                            | <b>Supplement (eAppendix 4)</b>        |
| Study characteristics                    | 18 | For each study, present characteristics for which data were extracted (e.g., study size, PICOS, follow-up period) and provide the citations.                                                                                                                                                                                                                                                                                                                 | <b>Supplement (eTable 1,2)</b>         |
| Risk of bias within studies              | 19 | Present data on risk of bias of each study and, if available, any outcome level assessment.                                                                                                                                                                                                                                                                                                                                                                  | <b>Supplement (eTable 3,4)</b>         |
| Results of individual studies            | 20 | For all outcomes considered (benefits or harms), present, for each study: 1) simple summary data for each intervention group, and 2) effect estimates and confidence intervals. <i>Modified approaches may be needed to deal with information from larger networks.</i>                                                                                                                                                                                      | <b>Supplement</b>                      |
| Synthesis of results                     | 21 | Present results of each meta-analysis done, including confidence/credible intervals. <i>In larger networks, authors may focus on comparisons versus a particular comparator (e.g. placebo or standard care), with full findings presented in an appendix. League tables and forest plots may be considered to summarize pairwise comparisons. If additional summary measures were explored (such as treatment rankings), these should also be presented.</i> | <b>p. 9-13, supplement</b>             |
| <b>Exploration for inconsistency</b>     | S5 | Describe results from investigations of inconsistency. This may include such information as measures of model fit to compare consistency and inconsistency models, <i>P</i> values from statistical tests, or summary of inconsistency estimates from different parts of the treatment network.                                                                                                                                                              | <b>p. 10, supplement (eAppendix 5)</b> |
| Risk of bias across studies              | 22 | Present results of any assessment of risk of bias across studies for the evidence base being studied.                                                                                                                                                                                                                                                                                                                                                        | <b>p. 9, Supplement (eTable 3,4)</b>   |
| Results of additional analyses           | 23 | Give results of additional analyses, if done (e.g., sensitivity or subgroup analyses, meta-regression analyses, <i>alternative network geometries studied, alternative choice of prior distributions for Bayesian analyses, and so forth</i> ).                                                                                                                                                                                                              | NA                                     |

|                     |    |                                                                                                                                                                                                                                                                                                                                                                                                                                |          |
|---------------------|----|--------------------------------------------------------------------------------------------------------------------------------------------------------------------------------------------------------------------------------------------------------------------------------------------------------------------------------------------------------------------------------------------------------------------------------|----------|
| <b>DISCUSSION</b>   |    |                                                                                                                                                                                                                                                                                                                                                                                                                                |          |
| Summary of evidence | 24 | Summarize the main findings, including the strength of evidence for each main outcome; consider their relevance to key groups (e.g., healthcare providers, users, and policy-makers).                                                                                                                                                                                                                                          | p. 13    |
| Limitations         | 25 | Discuss limitations at study and outcome level (e.g., risk of bias), and at review level (e.g., incomplete retrieval of identified research, reporting bias). <i>Comment on the validity of the assumptions, such as transitivity and consistency. Comment on any concerns regarding network geometry (e.g., avoidance of certain comparisons).</i>                                                                            | p. 15    |
| Conclusions         | 26 | Provide a general interpretation of the results in the context of other evidence, and implications for future research.                                                                                                                                                                                                                                                                                                        | p. 15-16 |
| <b>FUNDING</b>      |    |                                                                                                                                                                                                                                                                                                                                                                                                                                |          |
| Funding             | 27 | Describe sources of funding for the systematic review and other support (e.g., supply of data); role of funders for the systematic review. This should also include information regarding whether funding has been received from manufacturers of treatments in the network and/or whether some of the authors are content experts with professional conflicts of interest that could affect use of treatments in the network. | p. 2     |

# BMJ Open

## Testosterone therapy in hypogonadal men: a systematic review and network meta-analysis

|                                 |                                                                                                                                                                                                                                                                                                                                                                                                                                                                                                                                                                                                                                                                                                                                                                                                                                                                                                                                                                                                                                                                                      |
|---------------------------------|--------------------------------------------------------------------------------------------------------------------------------------------------------------------------------------------------------------------------------------------------------------------------------------------------------------------------------------------------------------------------------------------------------------------------------------------------------------------------------------------------------------------------------------------------------------------------------------------------------------------------------------------------------------------------------------------------------------------------------------------------------------------------------------------------------------------------------------------------------------------------------------------------------------------------------------------------------------------------------------------------------------------------------------------------------------------------------------|
| Journal:                        | <i>BMJ Open</i>                                                                                                                                                                                                                                                                                                                                                                                                                                                                                                                                                                                                                                                                                                                                                                                                                                                                                                                                                                                                                                                                      |
| Manuscript ID                   | bmjopen-2016-015284.R2                                                                                                                                                                                                                                                                                                                                                                                                                                                                                                                                                                                                                                                                                                                                                                                                                                                                                                                                                                                                                                                               |
| Article Type:                   | Research                                                                                                                                                                                                                                                                                                                                                                                                                                                                                                                                                                                                                                                                                                                                                                                                                                                                                                                                                                                                                                                                             |
| Date Submitted by the Author:   | 31-Jul-2017                                                                                                                                                                                                                                                                                                                                                                                                                                                                                                                                                                                                                                                                                                                                                                                                                                                                                                                                                                                                                                                                          |
| Complete List of Authors:       | Elliott, Jesse; University of Ottawa Heart Institute; University of Ottawa, School of Epidemiology and Public Health,<br>Kelly, Shannon; Ottawa Hospital Research Institute, Cardiovascular Research Methods Centre; University of Ottawa, School of Epidemiology and Public Health<br>Millar, Adam; Mount Sinai Hospital, University of Toronto<br>Peterson, Joan; Clinical Epidemiology Program, Ottawa Hospital Research Institute<br>Chen, Li; University of Ottawa Heart Institute, Cardiovascular Research Methods Centre<br>Johnston, Amy; Cardiovascular Research Methods Centre, University of Ottawa Heart Institute<br>Kotb, Ahmed; University of Ottawa Heart Institute,<br>Skidmore, Becky; Independent Information Specialist<br>Bai, Zemin; University of Ottawa Heart Institute, Cardiovascular Research Methods Centre<br>Mamdani, Muhammad; St Michael's Hospital, Li Ka Shing Knowledge Institute<br>Wells, George ; University of Ottawa Heart Institute, Cardiovascular Research Methods Centre; University of Ottawa, School of Epidemiology and Public Health |
| <b>Primary Subject Heading</b>: | Epidemiology                                                                                                                                                                                                                                                                                                                                                                                                                                                                                                                                                                                                                                                                                                                                                                                                                                                                                                                                                                                                                                                                         |
| Secondary Subject Heading:      | Sexual health                                                                                                                                                                                                                                                                                                                                                                                                                                                                                                                                                                                                                                                                                                                                                                                                                                                                                                                                                                                                                                                                        |
| Keywords:                       | testosterone, cardiovascular-related adverse events, systematic review, network meta-analysis, benefits, harms                                                                                                                                                                                                                                                                                                                                                                                                                                                                                                                                                                                                                                                                                                                                                                                                                                                                                                                                                                       |
|                                 |                                                                                                                                                                                                                                                                                                                                                                                                                                                                                                                                                                                                                                                                                                                                                                                                                                                                                                                                                                                                                                                                                      |

SCHOLARONE™  
Manuscripts

## Testosterone therapy in hypogonadal men: a systematic review and network meta-analysis

Word count: 3970

Jesse Elliott, Shannon E. Kelly, Adam C. Millar, Joan Peterson, Li Chen, Amy Johnston, Ahmed Kotb, Becky Skidmore, Zemin Bai, Muhammad Mamdani, George A Wells

Jesse Elliott MSc,  
Cardiovascular Research Methods Centre, University of Ottawa Heart Institute, 40 Ruskin Street, Ottawa, Ontario, K1Y4W7

Shannon Kelly MSc,  
Cardiovascular Research Methods Centre, University of Ottawa Heart Institute,  
40 Ruskin Street, Ottawa, Ontario, K1Y4W7

Adam C. Millar MD MScCH  
Department of Medicine, Mount Sinai Hospital, University of Toronto, Toronto, Ontario

Joan Peterson BSc,  
Clinical Epidemiology Program, Ottawa Hospital Research Institute, 1053 Carling Avenue, Ottawa, Ontario, K1Y 4E9

Li Chen MSc,  
Cardiovascular Research Methods Centre, University of Ottawa Heart Institute, 40 Ruskin Street, Ottawa, Ontario, K1Y4W7

Amy Johnston MSc,  
Cardiovascular Research Methods Centre, University of Ottawa Heart Institute,  
40 Ruskin Street, Ottawa, Ontario K1Y4W7

Ahmed Kotb MSc,  
Royal College of Surgeons in Ireland, 123 St. Stephen's Green, Dublin, Ireland

Becky Skidmore MLS,  
Independent Information Specialist, Ottawa, Ontario, K1T 3Z2

Zemin Bai MSc,  
Cardiovascular Research Methods Centre, University of Ottawa Heart Institute,  
40 Ruskin Street, Ottawa, Ontario K1Y4W7

Muhammad Mamdani PharmD,  
Li Ka Shing Knowledge Institute, St. Michael's Hospital; Toronto, Ontario M5B1W8



1  
2  
3  
4 George A. Wells PhD, Cardiovascular Research Methods Centre, University of Ottawa Heart Institute, 40  
5 Ruskin Street, Ottawa, Ontario, K1Y4W7  
6  
7

8 **Correspondence to:** GA Wells, gawells@ottawaheart.ca  
9

10 **Funding:** This study was support in part by the Ontario Drug Policy Research Network, which is funded  
11 by a grant from the Ontario Ministry of Health and Long-Term Care Health System Research Fund.  
12  
13

14 **Role of the funding source:** The funding source had no role in the design and conduct of the study;  
15 collection, management, analysis, and interpretation of the data; preparation, review, or approval of the  
16 manuscript; and decision to submit the manuscript for publication.  
17  
18  
19  
20

21 **Transparency:** The guarantor affirms that the manuscript is an honest, accurate, and transparent account  
22 of the study being reported; that no important aspects of the study have been omitted; and that any  
23 discrepancies from the study as planned and registered have been explained.  
24  
25  
26  
27

28 **Ethical approval:** not required.  
29  
30  
31

32 **Data sharing:** No additional data available.  
33  
34  
35

36 **Registration:** PROSPERO number: CRD42014009963  
37  
38

39 **Competing interest statement:** Dr. Mamdani reports receiving honoraria for serving on Advisory  
40 Boards for Astra Zeneca, Bristol-Myers Squibb, Eli Lilly and Company, GlaxoSmithKline, Hoffman La  
41 Roche, Novartis, Novo Nordisk, and Pfizer, outside the submitted work. Ms. Skidmore is a paid  
42 information consultant/contractor to the Ottawa Hospital Heart Institute. No conflicts declared by any  
43 other author.  
44  
45  
46  
47  
48

49 **Contributors:** JE, SK, MM, and GW designed the study. BS developed and executed the search strategy.  
50  
51 JE, SK, JP, AJ, AK, and ZB selected studies for inclusion and extracted data. JE, AK, and LC analyzed  
52 the data. JE, SK, LC, AM, and GW interpreted the data. JE wrote the first draft of the manuscript, which  
53  
54  
55  
56  
57  
58  
59  
60

1  
2  
3  
4 was critically revised for intellectual content by all authors. All authors approved the final version  
5  
6 submitted for publication and agree to be accountable for all aspects of the study.  
7  
8

9  
10 **Keywords:** testosterone, benefits, depression, quality of life, erectile function, libido, harms,  
11 cardiovascular-related adverse events, systematic review, network meta-analysis  
12  
13  
14  
15  
16  
17  
18  
19  
20  
21  
22  
23  
24  
25  
26  
27  
28  
29  
30  
31  
32  
33  
34  
35  
36  
37  
38  
39  
40  
41  
42  
43  
44  
45  
46  
47  
48  
49  
50  
51  
52  
53  
54  
55  
56  
57  
58  
59  
60

For peer review only

## ABSTRACT

**Objective:** To assess the relative effects of individual testosterone products among hypogonadal men.

**Design:** Systematic review and network meta-analysis.

**Methods:** We searched MEDLINE, Embase, Cochrane CENTRAL, and grey literature (May 25, 2017) for randomized controlled trials (RCTs) and non-randomized studies (NRS) that involved hypogonadal men given testosterone replacement therapy (TRT) for  $\geq 3$  months. Comparators were placebo, another TRT, or the same product at a different dose. Outcomes were quality of life, depression, libido, erectile function, activities of daily living, and testosterone levels, as well as cardiovascular death, myocardial infarction, stroke, prostate cancer, heart disease, diabetes, serious adverse events, withdrawals due to adverse events, and erythrocytosis. RCT data were pooled via meta-analysis and network meta-analysis. Risk of bias was assessed using Cochrane's Risk of Bias tool (RCTs) and SIGN50 (NRS).

**Results:** 87 RCTs and 51 NRS were included. Most were at high or unclear risk of bias, with short treatment duration and follow-up. When compared as a class against placebo, TRT improved quality of life (standardized mean difference [SMD] -0.26, 95% confidence interval [CI] -0.41,-0.11), libido (SMD 0.33, 95%CI 0.16,0.50), depression (SMD -0.23, 95%CI -0.44,-0.01), and erectile function (SMD 0.25, 95%CI 0.10,0.41). Most individual TRTs were significantly better than placebo at improving libido (6/10). Only one TRT was better than placebo at improving quality of life, and no individual TRTs improved depression or erectile function. There was no increased risk of adverse events, with the exception of withdrawals due to adverse events with the use of some TRTs.

**Conclusion:** Despite a class effect of improving quality of life, depression, erectile function, and libido, major improvements were not observed with the use of any individual product. We observed no statistically significant increase in the risk of adverse events; however, longer-term high-quality trials are needed to fully assess the risk of harm.

1  
2  
3  
4  
5 **Registration:** PROSPERO CRD42014009963  
6  
7  
8

9  
10 **Article Summary**

11 **Strengths and limitations**

- 12  
13  
14 • We performed a comprehensive systematic review of the published and grey literature to identify  
15 randomized and non-randomized studies involving adult men with low testosterone levels.  
16  
17  
18 • Although there is no universally agreed on level for the diagnosis of “low” testosterone, we included  
19 only studies that enrolled men with total testosterone  $\leq 12$  nmol/L or free testosterone  $\leq 225$  pmol/L,  
20 consistent with recent guidelines.  
21  
22  
23  
24 • Data from non-randomized studies were poorly reported and were not suitable to pooling via meta-  
25 analysis.  
26  
27  
28  
29 • The included studies were generally at high or unclear risk of bias, and most studies had a relatively  
30 short treatment and follow-up duration.  
31  
32  
33  
34 • Longer-term high-quality studies are needed to more fully assess the risk of rare adverse events.  
35  
36  
37  
38  
39  
40  
41  
42  
43  
44  
45  
46  
47  
48  
49  
50  
51  
52  
53  
54  
55  
56  
57  
58  
59  
60

## Introduction

Testosterone deficiency has well-recognized negative effects on male sexuality and quality of life.<sup>1</sup> Recent clinical practice guidelines recommend testosterone replacement therapy (TRT) for adult men with low testosterone levels (hypogonadal men) with the goal of improving symptoms and elevating testosterone levels into the mid-normal range for young men.<sup>2</sup> However, two large observational studies have reported an increased risk of cardiovascular events with testosterone use,<sup>3,4</sup> and the US Food and Drug Administration (FDA) and Health Canada both have warned of a potential increased risk of cardiovascular events among men using testosterone products.<sup>5,6</sup>

Previous meta-analyses have reported positive effects of TRT compared with placebo on quality of life,<sup>7</sup> depression,<sup>8,9</sup> and some aspects of sexual function.<sup>10</sup> However, the results of individual trials have been mixed, and there is variation in testosterone formulations and doses.<sup>11</sup> Similarly, previous meta-analyses of potential harms related to TRT use have reported contradictory findings.<sup>12-16</sup> A 2013 meta-analysis reported an increased risk of cardiovascular-related events in a mixed population of hypogonadal and eugonadal men<sup>15</sup>; however, others have found no increased risk of cardiovascular outcomes, including myocardial infarction, stroke, or cardiovascular death.<sup>12-14,16</sup>

Because there are multiple TRT products and many different dosing strategies,<sup>17</sup> it may not be appropriate to group together all testosterone products, as in traditional meta-analyses. In this study, we performed a systematic review to identify randomized controlled trials (RCTs) and non-randomized studies (NRS) involving hypogonadal men, and we used network meta-analysis to compare each individual product.

## Methods

This review was registered *a priori* (CRD42014009963) and followed the Cochrane handbook<sup>18</sup> and the PRISMA for Network Meta-Analysis checklist.<sup>19</sup> Our review included RCTs and NRS involving adult men with low testosterone taking any form of TRT compared to placebo, another TRT, or the same TRT at a different dose. We did not exclude studies on the basis of reported outcomes.

1  
2  
3  
4  
5 **Patient involvement:** No patients were involved in setting the research question or in developing plans  
6  
7 for design, or implementation of the study. A patient representative was involved in selecting the  
8  
9 outcome measures, and patient groups were given the opportunity to comment on the study protocol. No  
10  
11 patients were asked to advise on the interpretation or writing up of results. There are no plans to  
12  
13 disseminate the results of the research to study participants or the relevant patient community.  
14

15 **Search strategy:** Using the OVID platform, we searched Ovid MEDLINE, Ovid MEDLINE In-Process  
16  
17 & Other Non-Indexed Citations, and Embase Classic+Embase on June 3, 2014. We also searched  
18  
19 CENTRAL in the Cochrane Library on Wiley on the same date. Grey literature were searched according  
20  
21 to CADTH's Grey Matters Light.<sup>20</sup> All searches were updated on May 25, 2017.  
22  
23

24  
25 We used controlled vocabulary, including "Testosterone", "Testosterone Congeners" and "Androgens", to  
26  
27 which we applied relevant subheadings "administration & dosage", "analogs & derivatives", "adverse  
28  
29 events" and "therapeutic use", or combined with "Hormone Replacement Therapy." Our keywords  
30  
31 included "testosterone" or "androgen" in combination with means of administration (buccal, cream, gel,  
32  
33 implant, injections, oral, patch, transdermal) or function (replacement, substitute, supplement, therapy,  
34  
35 treatment). We also searched "TRT" and all known names for testosterone replacement products (e.g.,  
36  
37 androgel, Bio-T-Gel, Striant). Truncation, wildcards and proximity operators were incorporated as  
38  
39 appropriate and terminology and syntax were adjusted according to database and platform. The search  
40  
41 strategy is available in eAppendix1.  
42  
43

44 **Study selection:** We included placebo- and active-controlled RCTs and NRS involving adult men ( $\geq 18$   
45  
46 yr) with low testosterone (total testosterone  $\leq 12$  nmol/L or free testosterone  $< 225$  pmol/L) administered  
47  
48 a testosterone product. We excluded studies that artificially suppressed endogenous testosterone, involved  
49  
50 testosterone precursors, or had less than 10 participants. We included studies with a treatment duration of  
51  
52 12 weeks or longer, as follow-up is generally recommended for this time point.<sup>2,21</sup> Cross-over trials were  
53  
54 included if the initial period was at least 12 weeks. Titles and abstracts were screened in duplicate (JE, JP,  
55  
56  
57  
58  
59  
60

1  
2  
3  
4 ZB), and the full-text of any potentially relevant record was evaluated (JE, JP, AJ, ZB). Disagreements  
5  
6 were resolved by consensus.  
7  
8

9  
10 **Data extraction and risk of bias:** Data were extracted by one reviewer using piloted standardized  
11  
12 abstraction forms (Distiller SR) and checked by a second reviewer (JE, JP, AJ, AK, ZB). First-period data  
13  
14 were extracted from cross-over trials. Risk of bias was assessed by two reviewers using the Cochrane  
15  
16 Collaboration's risk of bias tool for RCTs or SIGN50 for cohort studies.<sup>22</sup> Disagreements were resolved  
17  
18 by discussion. Publication bias was assessed by visual inspection of funnel plots.  
19

20  
21 **Outcomes:** Outcomes of interest were quality of life, depression, libido, erectile function, activities of  
22  
23 daily living, and total testosterone level (at 3 mo, 6 mo, end of study) (continuous outcomes), as well as  
24  
25 cardiovascular death, myocardial infarction, stroke, prostate cancer, diabetes, heart disease, serious  
26  
27 adverse events, withdrawals due to adverse events, and erythrocytosis (dichotomous outcomes). We  
28  
29 included data for quality of life, depression, erectile function, and libido that had been measured using a  
30  
31 validated scale (eAppendix2), and the direction of each scale was standardized before analysis. A higher  
32  
33 effect estimate (e.g., positive SMD or MD) indicates improvement in libido, erectile function and  
34  
35 testosterone level, and a lower effect estimate indicates improvement in quality of life and depression.  
36  
37 Data from RCTs were included for quality of life, depression, libido, erectile function, and activities of  
38  
39 daily living, and testosterone levels, and data from RCTs and NRS were included for harms outcomes.  
40  
41  
42

43  
44 **Data analysis:** The results of the included NRS are summarized narratively. Meta-analysis and network  
45  
46 meta-analysis involving data from RCTs were performed as described below. We performed meta-  
47  
48 analysis using RevMan (v.5.3; Cochrane Collaboration) and Bayesian network meta-analysis using  
49  
50 WinBUGS (v.1.4.3; MRC Biostatistics Unit). Analyses were based on mean change from baseline for  
51  
52 quality of life, depression, erectile function, libido, and on mean after-treatment values for total  
53  
54 testosterone level. The number randomized was used as the denominator for quality of life, depression,  
55  
56 libido, erectile function, and total testosterone level, and the number who received treatment was used for  
57  
58  
59  
60

1  
2  
3  
4 harms. Two trials<sup>23,24</sup> were removed from the analyses because the data from these trials were outliers for  
5  
6 each outcome and each had a considerable effect on heterogeneity. In an exploratory analysis, we  
7  
8 removed trials enrolling men with major comorbidities (i.e., HIV/AIDS, osteoporosis, metabolic  
9  
10 syndrome, type 2 diabetes, angina, Alzheimer's disease, heart failure, end-stage renal disease).  
11  
12

13  
14 In the network meta-analysis, we used a binomial likelihood model for dichotomous outcomes and a  
15  
16 normal likelihood model for continuous outcomes, allowing for the inclusion of multi-arm trials.<sup>25</sup>  
17  
18 Network meta-analyses included all trials that reported each outcome with no restrictions based on  
19  
20 comorbidities. Each dose of an individual testosterone product was included as a separate node in the  
21  
22 evidence networks. A continuity correction was applied to adjust for zero events for harm outcomes.  
23  
24 Assessment of model fit and choice of model (fixed v. random effects) was based on assessment of the  
25  
26 deviance information criterion and comparison of residual deviance to the number of unconstrained data  
27  
28 points.<sup>25</sup> Results are reported for the random-effects model. We derived point estimates and 95% credible  
29  
30 intervals (CrIs) using the Markov Chain Monte Carlo method. Mean differences (MDs), standardized  
31  
32 mean differences (SMDs) with standard deviations (SDs) or odds ratios (ORs) with 95% CrIs or CIs are  
33  
34 reported for continuous or dichotomous outcomes as appropriate. Vague priors (e.g.,  $N[0, 100^2]$ ) were  
35  
36 assigned for basic parameters throughout.<sup>25</sup> To ensure model convergence, trace plots and Brooks-  
37  
38 Gelman-Rubin statistics were assessed.<sup>26</sup> Three chains were fit for each analysis with at least 20,000  
39  
40 iterations and a burn-in of at least 20,000 iterations. Inconsistency was assessed where possible by  
41  
42 comparing the deviance, between-study variance, and deviance information criterion statistics of the  
43  
44 consistency and inconsistency models.<sup>27</sup> The posterior mean deviance of the individual data points in the  
45  
46 inconsistency model was plotted against the posterior mean deviance in the consistency model.<sup>27</sup> All  
47  
48 network diagrams were constructed using NodeXL.  
49  
50  
51  
52  
53  
54  
55  
56  
57  
58  
59  
60



1  
2  
3  
4 **Role of the funding source:** The funder had no role in study design, data collection, analysis,  
5  
6 interpretation, or writing. All authors had full access to the study data, and the corresponding author had  
7  
8 final responsibility for the decision to submit for publication.  
9

## 10 11 **Results**

### 12 **Search results and study characteristics**

13  
14 We identified 87 RCTs and 51 NRS published between 1997 and 2017, corresponding to 196 records  
15  
16 (Figure 1, eAppendix 3). Of these, 70 RCTs and 19 NRS reported an outcome of interest (eTable1,2). The  
17  
18 median treatment duration of the RCTs was 6 months (range: 3–36 mo), with mean participant age  
19  
20 ranging between 30 and 78 years (eAppendix 4, eTable1). Most RCTs were placebo controlled (87%),  
21  
22 with 2 treatment groups (89%). Of the included NRS, 10 were retrospective and 9 were prospective  
23  
24 cohorts, with a duration up to 8 years (eTable2). Few RCTs or NRS were at low risk of bias, primarily  
25  
26 because of a lack of details about randomization procedures, allocation concealment, and analysis  
27  
28 populations (eTable3,4). Based on visual inspection of funnel plots, publication bias could not be ruled  
29  
30 out for most outcomes (eAppendix 5).  
31  
32  
33  
34  
35

### 36 **Network consistency**

37  
38 Comparison of the consistency and inconsistency models for libido and total testosterone levels did not  
39  
40 show evidence of inconsistency (eAppendix6). Consistency could not be evaluated for quality of life,  
41  
42 depression, or erectile function because of a lack of closed loops. The full network characteristics and  
43  
44 evidence networks are presented in eAppendix7 and eFigure 1A-1E.  
45  
46  
47  
48

### 49 **Outcomes**

50  
51 **Quality of life:** In total, 23 RCTs (21 placebo-controlled, 2 active-controlled) involving 3090 participants  
52  
53 assessed quality of life. Compared with placebo, treatment with any TRT significantly improved quality  
54  
55 of life (SMD -0.26, 95%CI -0.41,-0.11; n = 2834) with substantial heterogeneity ( $I^2 = 71\%$ ; Figure 2).  
56  
57  
58  
59  
60

1  
2  
3  
4 To explore this heterogeneity, we excluded RCTs that involved men with major comorbidities. This had  
5 little effect on heterogeneity ( $I^2 = 62\%$ ) or the point estimate (SMD  $-0.17$ , 95%CI  $-0.34, -0.01$ ; eFigure  
6  
7  
8  
9 2).

10  
11 The evidence network for quality of life comprised 23 RCTs, representing 14 treatments in addition to  
12 placebo (Figure 3). Intramuscular (IM) testosterone undecanoate (TU; 1000 mg/12 wk) significantly  
13 improved quality of life relative to placebo (SMD  $-0.48$ , 95%CI  $-0.84, -0.10$ ) and to oral TU (160 mg/d;  
14 SMD  $-0.68$ , 95%CI  $-1.32, -0.02$ ), with no other significant differences among the other treatments (Table  
15  
16  
17  
18  
19  
20  
21  
22  
23  
24  
25  
26  
27  
28  
29  
30  
31  
32  
33  
34  
35  
36  
37  
38  
39  
40  
41  
42  
43  
44  
45  
46  
47  
48  
49  
50  
51  
52  
53  
54  
55  
56  
57  
58  
59  
60  
1). The results were consistent when studies involving men with major comorbidities were removed from  
the network, despite 3 fewer treatments being included in the network (data not shown).

**Depression:** Twelve RCTs (11 placebo-controlled, 1 active-controlled) involving 852 participants  
randomized to 9 treatments evaluated depression. Compared with placebo, treatment with any TRT  
improved depression (SMD  $-0.23$ , 95%CI  $-0.44, -0.01$ ;  $n = 786$ ;  $I^2 = 44\%$ ) (eAppendix 8 [eFigure3A]).  
Removal of trials involving men with major comorbidities did not reduce heterogeneity although the  
effect of TRT was no longer statistically significant (SMD  $-0.12$ , 95%CI  $-0.49, 0.26$ ;  $I^2 = 56\%$ )  
(eFigure3B).

In the network meta-analysis, there were no significant differences in depression for any individual TRT  
compared with placebo or among the treatments (eTable5). Removal of trials involving major  
comorbidities did not alter the results (2 treatments removed; data not shown).

**Libido:** Fourteen RCTs (12 placebo-controlled, 2 active-controlled) involving 3167 patients randomized  
to 10 treatments investigated libido. Compared with placebo, treatment with any TRT significantly  
improved libido (SMD  $0.33$ , 95%CI  $0.16, 0.50$ ;  $I^2 = 74\%$ ;  $n = 2732$ ) (eFigure4A). Removal of trials  
involving men with major comorbidities increased heterogeneity ( $I^2 = 80\%$ ), and the point estimate was  
no longer statistically significant (SMD  $0.19$ , 95%CI  $-0.03, 0.41$ ) (eFigure4B).

1  
2  
3  
4  
5 In the network meta-analysis, most individual treatments significantly improved libido compared with  
6 placebo (6/10 treatments; eTable6). Among the treatments, 1% gel (100 mg/d) was significantly better  
7 than patch (5 mg/d) and oral TU (160 mg/d), and oral TU (120 mg/d) was significantly better than patch  
8 (5 mg/d) and 1% gel (75 mg/d). Oral TU (160 mg/d) was significantly worse than most other TRTs in the  
9 network (8/9 TRTs) (eTable6). Removal of trials involving major comorbidities resulted in the removal of  
10 4 treatments from the network; however, the results were consistent for the remaining treatments (data not  
11 shown).  
12  
13  
14  
15  
16  
17  
18  
19

20  
21 **Erectile function:** 17 RCTs (all placebo-controlled) involving 3165 patients randomized to 9 treatments  
22 evaluated erectile function. Compared with placebo, treatment with any TRT improved erectile function  
23 (SMD 0.25, 95%CI 0.10, 0.41), with substantial heterogeneity ( $I^2 = 74%$ ; eFigure5A). Removing trials  
24 involving men with major comorbidities reduced heterogeneity ( $I^2 = 58%$ ), with no qualitative change to  
25 the point estimate (SMD 0.36, 95%CI 0.21, 0.51; eFigure5B).  
26  
27  
28  
29  
30  
31

32 In the network meta-analysis, there were no significant differences in erectile function between placebo  
33 and any individual TRT or among the treatments (eTable7). Removal of trials involving major  
34 comorbidities did not alter the results (2 treatments removed; data not shown).  
35  
36  
37  
38

39  
40 **Activities of daily living:** One RCT reported no significant difference in activities of daily living among  
41 men with mild cognitive impairment following 6 months of TRT (testosterone gel 50–100 mg/d)  
42 compared with placebo ( $p = 0.31$ ).<sup>28</sup>  
43  
44  
45  
46

47 **Testosterone levels:** In total, 26 and 23 RCTs reported total testosterone levels after 3 or 6 months of  
48 treatment, respectively. End of treatment testosterone levels were reported in 57 RCTs. After 3 or 6  
49 months of treatment, about half of the treatments in each network were associated with significantly  
50 higher total testosterone levels compared with placebo (3 mo: 6/15; 6 mo: 11/18) (eTables 8,9). By the  
51 end of treatment (12 wk to 36 mo), most products were associated with total testosterone above 12  
52  
53  
54  
55  
56  
57  
58  
59  
60

1  
2  
3  
4 nmol/L (26/28 testosterone therapies), and 17 of 28 treatments had significantly higher levels relative to  
5  
6 placebo (eTable10).  
7  
8

9  
10 **Cardiovascular death:** 10 RCTs reported the occurrence of cardiovascular death during the treatment  
11 period, while an additional 9 trials reported that no CV deaths had occurred (18 placebo-controlled  
12 RCTs). Compared with placebo via pair wise meta-analysis, there was no significant difference in the risk  
13 of cardiovascular death between placebo and any TRT (all products grouped together) (OR 2.15, 95% CI  
14 0.72,6.45;  $I^2 = 11\%$ ) (Figure 4; Table 2). Because of the low event rate, network meta-analysis did not  
15 provide robust estimates for this outcome (data not reported).  
16  
17  
18  
19  
20  
21

22  
23 **Other adverse events:** Compared with placebo via meta-analysis, there were no increased odds of  
24 myocardial infarction, stroke, prostate cancer, heart disease, erythrocytosis, or serious adverse events,  
25 with the use of any TRT product (Table 2; eFigure 6-11). Although not statistically significant,  
26 withdrawals due to adverse events tended to be significantly higher among TRT users compared with  
27 placebo (OR 1.31, 95% CI 0.98, 1.73;  $I^2 = 13\%$ )(eFigure12). No RCTs reported incident diabetes during  
28 the treatment period.  
29  
30  
31  
32  
33  
34  
35

36  
37 Owing to the low event rates for most outcomes, network meta-analysis was only possible for serious  
38 adverse events and withdrawals due to adverse events. In the head-to-head comparison of TRTs, there  
39 was no significant difference in serious adverse events between any TRT and placebo or among the TRTs  
40 (eTable11). Use of testosterone patch (5 mg/d) was associated with an increased odds of withdrawal due  
41 to adverse events compared with placebo and many of the other TRTs (eTable12).  
42  
43  
44  
45  
46  
47  
48

#### 49 **Nonrandomized studies**

50  
51 The reporting of harms in the included NRS was generally poor, primarily because of a lack of  
52 transparency around the number of patients assigned to each group, the number of events per group,  
53 and/or the type or dose of TRT (eTable13). In the longest prospective cohort study, involving 656 men  
54  
55  
56  
57  
58  
59  
60

1  
2  
3  
4 followed for up to 10 years,<sup>29</sup> men who had received IM TU (1000 mg/12 wk) were at lower risk of death  
5  
6 (incidence of death: TRT group 0.0092 [95%CI 0.0032,0.0368]; no TRT group 0.1145 [95%CI 0.0746,  
7  
8 0.1756]), with 19 of 21 deaths in the control group attributed to cardiovascular causes and zero of 2  
9  
10 deaths in the TRT group due to cardiovascular causes. Non-fatal MI and non-fatal stroke were also more  
11  
12 common in the untreated group than in the TRT group (TRT group: 0 MI, 0 stroke; no TRT group: 26 MI,  
13  
14 30 stroke). In a large retrospective cohort study in the US involving 8808 men dispensed a TRT product  
15  
16 and 35,527 men never dispensed TRT,<sup>30</sup> men in the TRT group were at lower risk of sudden  
17  
18 cardiovascular death (adjusted hazard ratio [aHR] 0.76, 95%CI 0.61, 0.93), acute MI (aHR 0.74; 95%CI  
19  
20 0.63, 0.86), and stroke (aHR 0.64, 95% CI 0.52, 0.80) over a median follow-up time of 3.4 years. In  
21  
22 contrast, an earlier retrospective cohort study involving among 8709 men who had undergone  
23  
24 angiography reported that those who had filled a prescription for TRT were at higher risk of an adverse  
25  
26 cardiovascular event (aHR 1.29, 95%CI 1.05,1.58) compared men with no TRT prescription.<sup>3</sup>  
27  
28  
29 Concerning the relative safety of the different TRTs, one retrospective cohort study<sup>31</sup> reported no  
30  
31 significant difference in risk between injection or gel TRT users with low testosterone at baseline for MI  
32  
33 (aHR1.64, 95%CI 0.57, 4.69) stroke (aHR 1.28, 0.27, 6.02), or death (a HR 5.53, 95% CI 0.98, 31.15).  
34  
35  
36 Prostate cancer was reported by 10 NRS.<sup>29,32-40,41</sup> In a large prospective registry involving 999 newly  
37  
38 diagnosed hypogonadal men,<sup>37</sup> there was no statistically significant difference in the risk of prostate  
39  
40 cancer between men who used or did not use TRT (incidence rate ratio 0.52, 95%CI 0.22, 1.26). Traish  
41  
42 and colleagues<sup>29</sup> also reported fewer cases of prostate cancer among men who received TRT (IM TU)  
43  
44 compared with hypogonadal men who did not receive TRT (TU: 7/360 men v. no TRT: 12/296 men) over  
45  
46 a median follow-up of 7 years, and Yassin and colleagues<sup>35</sup> reported positive biopsies for prostate cancer  
47  
48 among 16.7% of TRT users compared with 51.9% of non-users, as well as a lower severity in terms of  
49  
50 staging and grading in their prospective study of prostate cancer among hypogonadal men. Among men  
51  
52 with a previous diagnosis of prostate cancer, one small retrospective cohort study<sup>41</sup> reported no  
53  
54 recurrences of prostate cancer among TRT users during the follow-up period (36 months). The reporting  
55  
56  
57  
58  
59  
60

1  
2  
3  
4 of outcomes and treatment group in most of the remaining studies was poor: either the group assignment  
5  
6 of the men who experienced prostate cancer or the number of men in each treatment group was not  
7  
8 reported in each (eTable13).<sup>33,34,38</sup>  
9  
10

## 11 **DISCUSSION**

12  
13  
14 Despite more than 70 years of clinical use, TRT remains a controversial topic. Part of the controversy  
15  
16 may be a result of different actions of the various testosterone preparations. In an attempt to clarify the  
17  
18 benefits and harms of individual testosterone products, we used traditional pair-wise meta-analysis as well  
19  
20 as network meta-analysis, which allows the relative comparison of products that have not been compared  
21  
22 in head-to-head trials. Consistent with most previous meta-analyses,<sup>8,7,10</sup> we found that the use of TRT  
23  
24 improved quality of life, depression, libido, and erectile function, with no increase in cardiovascular death  
25  
26 or other major adverse events.  
27  
28

29  
30 In the head-to-head comparison of individual testosterone treatments, we found no significant differences  
31  
32 among products in their effect on depression or erectile function. For libido, testosterone gel (1%, 100  
33  
34 mg/d) was significantly better than testosterone patch (5 mg/d) and oral TU (160 mg/d). Oral TU (160  
35  
36 mg/d) was significantly worse than most other treatments in the network, including oral testosterone  
37  
38 undecanoate at 120 mg/d. The finding that a lower dose of oral TU was more effective than a higher dose  
39  
40 was unexpected and requires further investigation.  
41  
42

43  
44 Conflicting data exist about the risk of adverse cardiovascular events among TRT users. The FDA and  
45  
46 Health Canada both issued alerts in 2015 based in part on the findings of two observational studies.<sup>3,4</sup> In  
47  
48 their retrospective cohort, Vigen and colleagues<sup>3</sup> included men with low testosterone who had undergone  
49  
50 angiography, reporting an increased risk of a composite cardiovascular outcome that included all-cause  
51  
52 mortality, myocardial infarction, and stroke (aHR 1.29, 95%CI 1.04, 1.58). Most participants in this study  
53  
54 were receiving TRT in the form of a patch (63%) and had significant medical comorbidities, which may  
55  
56 limit generalizability. The retrospective study by Finkle and colleagues<sup>4</sup> did not report the baseline  
57  
58  
59  
60

1  
2  
3  
4 testosterone level of men in their cohort nor was the cohort restricted to men with androgen deficiency; as  
5  
6 such, this study was not eligible for inclusion in our review, but their findings that the risk of non-fatal MI  
7  
8 is increased in the first 90 days following testosterone prescription is concerning. However, other recent  
9  
10 large observational studies have reported a lower risk of cardiovascular death, stroke and MI among TRT  
11  
12 users,<sup>29,30</sup> supporting the findings of earlier observational studies that reported a lower risk of all-cause  
13  
14 death among hypogonadal men using TRT.<sup>40</sup>  
15  
16

17  
18 Previous meta-analyses have also reported contradictory findings concerning the risk of adverse events  
19  
20 among TRT users. One meta-analysis reported an increase risk of cardiovascular adverse events among  
21  
22 men using TRT,<sup>15</sup> while a number of other meta-analyses have found no increased risk of cardiovascular  
23  
24 events among TRT users.<sup>12-14,16,42,43</sup> The meta-analysis by Xu and colleagues<sup>15</sup> involved a broad  
25  
26 composite outcome (cardiac disorder, cardiovascular complaints, cardiovascular events, vascular  
27  
28 disorders) and has been criticized for use of a fixed-effects model: subsequent reanalysis using a random-  
29  
30 effects model found no significant increase in the risk of cardiovascular events.<sup>43</sup> Our findings are  
31  
32 consistent with previous meta-analyses that have found no increased risk of individual cardiovascular  
33  
34 events compared with placebo.<sup>12-14,16,42,43</sup>  
35  
36

37  
38 Although we had intended to analyze the effects of individual testosterone products among men aged 65  
39  
40 years and older, data were limited because most RCTs included a wide age range. The Testosterone Trials  
41  
42 were designed to address this lack of data among elderly men.<sup>44</sup> After one year of treatment with 1%  
43  
44 testosterone gel, improved desire and erectile function were reported among men with low sexual  
45  
46 function at baseline, with no apparent increase in the risk of adverse cardiovascular events.<sup>44</sup> Although  
47  
48 these findings are encouraging, the trials were not powered to detect adverse events, and the results  
49  
50 should not be generalized to different testosterone preparations.  
51  
52

### 53 54 55 **Strengths and limitations** 56 57 58 59 60

1  
2  
3  
4 The strengths of this study include a comprehensive search of the published and grey literature without  
5 language or date restrictions. In contrast with some previous reviews, we included only studies that  
6  
7 enrolled men with total testosterone  $\leq 12$  nmol/L or free testosterone  $\leq 225$  pmol/L. Although there is no  
8  
9 universally agreed on threshold value for low testosterone, a recent guideline recommends TRT for men  
10  
11 with total testosterone lower than 12 nmol/L.<sup>11</sup>  
12  
13

14  
15  
16 Our study had several limitations. First, the included studies used a variety of assays to determine  
17  
18 testosterone levels and a variety of cut-off values for determining “low” testosterone. This has been noted  
19  
20 by others.<sup>11,45</sup> The US Centers for Disease Control and Prevention’s Hormone Standardization Project<sup>46</sup>  
21  
22 will help to resolve this issue. Second, the included RCTs and NRS were generally at unclear or high risk  
23  
24 of bias, which may have an impact on the reliability of subjective data. Third, the duration of treatment  
25  
26 and the length of follow-up may have been too short to see an effect of TRT for all outcomes, including  
27  
28 adverse events. In keeping with the recommendation to reassess symptoms after 3 months of TRT,<sup>21</sup> we  
29  
30 included only studies with a treatment duration of 3 months or longer. The median duration of treatment  
31  
32 was 6 months in the RCTs, but it is possible that some symptoms may take longer to resolve. Fourth,  
33  
34 although some individual RCTs showed a positive effect of TRT on depression and erectile function  
35  
36 compared with placebo, in the network meta-analysis no individual TRTs showed a positive effect  
37  
38 compared with placebo. This phenomenon has been noted in previously and results in a more  
39  
40 conservative estimate of effect.<sup>47</sup>  
41  
42  
43  
44

## 45 **Conclusions**

46  
47  
48 To the best of our knowledge, this is the first study to compare the benefits and harms of individual  
49  
50 testosterone products among hypogonadal men. Our study builds on previous meta-analyses by  
51  
52 comparing the relative effects of individual testosterone treatments, most of which have never been  
53  
54 compared in head-to-head trials. When considered as a class (any TRT compared to placebo), TRT  
55  
56 improved quality of life, depression, erectile function, and libido; however, when the individual products  
57  
58  
59  
60



1  
2  
3  
4 were compared head to head, there were few differences between the treatments. We found no increased  
5  
6 risk of major harms; however, this must be viewed in light of the high risk of bias of the included studies,  
7  
8 the rare nature of serious harms, and the short treatment duration and follow-up of most studies. Future  
9  
10 studies need to be rigorous in design and delivery, and include comprehensive descriptions of all aspects  
11  
12 of methodology to further enable appraisal and interpretation of results.  
13  
14

15  
16 **Acknowledgements:** We thank Wenfei Liu for assistance in screening records during the 2015 update of  
17  
18 the literature search.  
19  
20  
21  
22  
23  
24  
25  
26  
27  
28  
29  
30  
31  
32  
33  
34  
35  
36  
37  
38  
39  
40  
41  
42  
43  
44  
45  
46  
47  
48  
49  
50  
51  
52  
53  
54  
55  
56  
57  
58  
59  
60

## REFERENCES

1. Morgentaler A, Zitzmann M, Traish AM, et al. Fundamental Concepts Regarding Testosterone Deficiency and Treatment. *Mayo Clin Proc.* 2016;91(7):881-896. doi:10.1016/j.mayocp.2016.04.007.
2. Morales A, Bebb RA, Manjoo P, et al. Diagnosis and management of testosterone deficiency syndrome in men: Clinical practice guideline. *Cmaj.* 2015;187(18):1369-1377. doi:10.1503/cmaj.151208.
3. Vigen R, O'Donnell CI, Baron AE, et al. Association of Testosterone Therapy With Mortality, Myocardial Infarction, and Stroke in Men With Low Testosterone Levels. *JAMA.* 2013;310(17):1829. doi:10.1001/jama.2013.280386.
4. Finkle WD, Greenland S, Ridgeway GK, et al. Increased Risk of Non-Fatal Myocardial Infarction Following Testosterone Therapy Prescription in Men. *PLoS One.* 2014;9(1):1-7. doi:10.1371/journal.pone.0085805.
5. Summary Safety Review – Testosterone Replacement Products Cardiovascular Risk 2014. [www.hc-sc.gc.ca/dhp-mps/medeff/reviews-examens/testosterone-eng.php](http://www.hc-sc.gc.ca/dhp-mps/medeff/reviews-examens/testosterone-eng.php). Accessed August 15, 2016.
6. FDA Drug Safety Communication: FDA cautions about using testosterone products for low testosterone due to aging; requires labeling change to inform of possible increased risk of heart attack and stroke with use. [www.fda.gov/downloads/Drugs/DrugSafety/UCM436270.pdf](http://www.fda.gov/downloads/Drugs/DrugSafety/UCM436270.pdf). Accessed August 15, 2015.
7. Guo C, Gu W, Liu M, et al. Efficacy and safety of testosterone replacement therapy in men with hypogonadism: A meta-analysis study of placebo-controlled trials. *Exp Ther Med.* 2016;11(3):853-863. doi:10.3892/etm.2015.2957.
8. Amanatkar HR, Chibnall JT, Seo B-W, Manepalli JN, Grossberg GT. Impact of exogenous testosterone on mood: a systematic review and meta-analysis of randomized placebo-controlled trials. *Ann Clin Psychiatry.* 2014;26(1):19-32.
9. Zarrouf FA, Artz S, Griffith J, Sirbu C, Kommor M. Testosterone and depression: systematic review and meta-analysis. *J Psychiatr Pract.* 2009;15(4):289-305. doi:10.1097/01.pra.0000358315.88931.fc.
10. Bolona ER, Uruga M V, Haddad RM, et al. Testosterone use in men with sexual dysfunction: a systematic review and meta-analysis of randomized placebo-controlled trials. *Mayo Clin Proc.* 2007;82(1):20-28. doi:10.4065/82.1.20.
11. Isidori AM, Balercia G, Calogero AE, et al. Outcomes of androgen replacement therapy in adult male hypogonadism: Recommendations from the Italian Society of Endocrinology. *J Endocrinol Invest.* 2015;38(1):103-112. doi:10.1007/s40618-014-0155-9.
12. Haddad RM, Kennedy CC, Caples SM, et al. Testosterone and cardiovascular risk in men: a systematic review and meta-analysis of randomized placebo-controlled trials. *Mayo Clin Proc.* 2007;82(1):29-39. doi:10.4065/82.1.29.

13. Fernandez-Balsells MM, Murad MH, Lane M, et al. Clinical review 1: Adverse effects of testosterone therapy in adult men: a systematic review and meta-analysis. *J Clin Endocrinol Metab.* 2010;95(6):2560-2575. doi:10.1210/jc.2009-2575.
14. Calof OM, Singh AB, Lee ML, et al. Adverse events associated with testosterone replacement in middle-aged and older men: a meta-analysis of randomized, placebo-controlled trials. *J Gerontol A Biol Sci Med Sci.* 2005;60(11):1451-1457.
15. Xu L, Freeman G, Cowling BJ, Schooling CM. Testosterone therapy and cardiovascular events among men: a systematic review and meta-analysis of placebo-controlled randomized trials. *BMC Med.* 2013;11:108. doi:10.1186/1741-7015-11-108.
16. Corona G, Maseroli E, Rastrelli G, et al. Cardiovascular risk associated with testosterone-boosting medications: a systematic review and meta-analysis. *Expert Opin Drug Saf.* 2014;13:1327-1351. doi:10.1517/14740338.2014.950653.
17. McGill JJ, Shoskes DA, Sabanegh ES. Androgen deficiency in older men: indications, advantages, and pitfalls of testosterone replacement therapy. *Cleve Clin J Med.* 2012;79:797-806. doi:10.3949/ccjm.79a.12010.
18. Higgins JP, Green S, eds. *Cochrane Handbook for Systematic Reviews of Interventions.*; 2008.
19. Hutton B, Salanti G, Caldwell DM, et al. The PRISMA extension statement for reporting of systematic reviews incorporating network meta-analyses of health care interventions: Checklist and explanations. *Ann Intern Med.* 2015;162(11):777-784. doi:10.7326/M14-2385.
20. Grey matters light.  
[https://www.cadth.ca/sites/default/files/is/cadth\\_Handout\\_greymatters\\_light\\_e.pdf](https://www.cadth.ca/sites/default/files/is/cadth_Handout_greymatters_light_e.pdf). Accessed August 15, 2016.
21. Buvat J, Maggi M, Guay A, Torres LO. Testosterone Deficiency in Men: Systematic Review and Standard Operating Procedures for Diagnosis and Treatment. *J Sex Med.* 2013;10(1):245-284. doi:10.1111/j.1743-6109.2012.02783.x.
22. Sleith C. *Methodology Checklist 3: Cohort Studies.* Edinburgh; 2012. [www.sign.ac.uk/checklists-and-notes.html](http://www.sign.ac.uk/checklists-and-notes.html). Accessed June 12, 2017.
23. Cavallini G, Caracciolo S, Vitali G, Modenini F, Biagiotti G. Carnitine versus androgen administration in the treatment of sexual dysfunction, depressed mood, and fatigue associated with male aging. *Urology.* 2004;63:641-646.  
<http://www.sciencedirect.com/science/article/pii/S0090429503013013>.
24. Zhang XW, Liu ZH, Hu XW, et al. Androgen replacement therapy improves psychological distress and health-related quality of life in late onset hypogonadism patients in Chinese population. *Chin Med J.* 2012;125:3806-3810.
25. Dias S, Sutton A, Welton N, Ades A, Golfinopoulos V, Kyrgiou M. *NICE DSU Technical Support Document 2: Generalised Linear Modelling Framework for Pairwise and Network Meta-Analysis of Randomised Controlled Trials.* [www.nicedsu.org.uk/TSD6 Software.final.08.05.12.pdf](http://www.nicedsu.org.uk/TSD6%20Software.final.08.05.12.pdf).
26. Spiegelhalter D, Thomas A, Best N, Lunn D. *WinBUGS User Manual.*; 2003. [www.mrc-bsu.cam.ac.uk/wp-content/uploads/manual14.pdf](http://www.mrc-bsu.cam.ac.uk/wp-content/uploads/manual14.pdf).

- 1
- 2
- 3
- 4
- 5 27. Dias S, Welton N, Sutton A, Caldwell D, Lu G, Ades A. Evidence synthesis for decision making
- 6 4: inconsistency in networks of evidence based on randomized controlled trials. *Med Decis Mak.*
- 7 2013;33(5):641-656.
- 8
- 9 28. Cherrier MM, Anderson K, Shofer J, Millard S, Matsumoto AM. Testosterone treatment of men
- 10 with mild cognitive impairment and low testosterone levels. *Am J Alzheimers Dis Other Demen.*
- 11 2015;30(4):421.
- 12
- 13 29. Traish AM, Haider A, Haider KS, Doros G, Saad F. Long-Term Testosterone Therapy Improves
- 14 Cardiometabolic Function and Reduces Risk of Cardiovascular Disease in Men with
- 15 Hypogonadism. 2017;1074248417(United States eISSN-1940-4034 (Electronic) PT-Journal
- 16 Article LG-English DC-20170419 OVID MEDLINE UP 20170421).
- 17
- 18 30. Cheetham TC, An JJ, Jacobsen SJ, et al. Association of testosterone replacement with
- 19 cardiovascular outcomes among men with androgen deficiency. *JAMA Intern Med.*
- 20 2017;177(4):491.
- 21
- 22 31. Layton JB, Meier CR, Sharpless JL, Sturmer T, Jick SS, Brookhart MA. Comparative Safety of
- 23 Testosterone Dosage Forms. *JAMA Intern Med.* 2015;175(7):1187.
- 24
- 25 32. Blick G. Optimal diagnostic measures and thresholds for hypogonadism in men with HIV/AIDS:
- 26 comparison between 2 transdermal testosterone replacement therapy gels. *Postgrad Med.*
- 27 2013;125:30-39.
- 28
- 29 33. Wang C, Cunningham G, Dobs A, et al. Long-term testosterone gel (AndroGel) treatment
- 30 maintains beneficial effects on sexual function and mood, lean and fat mass, and bone mineral
- 31 density in hypogonadal men. *J Clin Endocrinol Metab.* 2004;89:2085-2098.
- 32
- 33 34. Dean JD, Carnegie C, Rodzvilla J, Smith T. Long-term effects of testim(r) 1% testosterone gel in
- 34 hypogonadal men. *Rev. 2005;urol.. 7:87-94.*
- 35 <http://www.ncbi.nlm.nih.gov/pmc/articles/PMC1477565>.
- 36
- 37 35. Yassin A, Salman M, Talib RA, Yassin D-J. Is there a protective role of testosterone against high-
- 38 grade prostate cancer? Incidence and severity of prostate cancer in 553 patients who underwent
- 39 prostate biopsy: a prospective data register. *Aging Male.* 2017;(0)(pp)(pp 1-9), 2017. Date of
- 40 Publication: 09 Mar 2017.):1.
- 41
- 42 36. Jung HJ, Shin HS. Effect of Testosterone Replacement Therapy on Cognitive Performance and
- 43 Depression in Men with Testosterone Deficiency Syndrome. 2016;34(3):194.
- 44
- 45 37. Debruyne FMJ, Behre HM, Roehrborn CG, et al. Testosterone treatment is not associated with
- 46 increased risk of prostate cancer or worsening of lower urinary tract symptoms: prostate health
- 47 outcomes in the Registry of Hypogonadism in Men. *BJU Int.* 2017;119(2):216.
- 48
- 49 38. Guay AT, Perez JB, Fitaihi WA, Vereb M. Testosterone treatment in hypogonadal men: prostate-
- 50 specific antigen level and risk of prostate cancer. *Endocr Pract.* 2000;6:132-138.
- 51
- 52 39. Rhoden EL, Morgentaler A. Influence of demographic factors and biochemical characteristics on
- 53 the prostate-specific antigen (PSA) response to testosterone replacement therapy. *Int J Impot Res*
- 54 *(pp 201-205), 2006Date Publ March 2006.* 2006:201-205.
- 55
- 56 40. Shores MM, Smith NL, Forsberg CW, Anawalt BD, Matsumoto AM. Testosterone treatment and
- 57
- 58
- 59
- 60

- 1  
2  
3  
4 mortality in men with low testosterone levels. *J Clin Endocrinol Metab.* 2012;97:2050-2058.
- 5  
6  
7 41. Pastuszak AW, Gomez LP, Scovell JM, Khara M, Lamb DJ, Lipshultz LI. Comparison of the  
8 Effects of Testosterone Gels, Injections, and Pellets on Serum Hormones, Erythrocytosis, Lipids,  
9 and Prostate-Specific Antigen. *Sex Med.* 2015;3(3):165.
- 10  
11 42. Albert SG, Morley JE. Testosterone therapy, association with age, initiation and mode of therapy  
12 with cardiovascular events: a systematic review. *Clin Endocrinol (Oxf).* 2016;85(3):436-443.  
13 doi:10.1111/cen.13084.
- 14  
15 43. Borst SE, Shuster JJ, Zou B, et al. Cardiovascular risks and elevation of serum DHT vary by route  
16 of testosterone administration: a systematic review and meta-analysis. *BMC Med.*  
17 2014;12(Cv):211. doi:10.1186/s12916-014-0211-5.
- 18  
19 44. Snyder PJ, Bhasin S, Cunningham GR, et al. Effects of Testosterone Treatment in Older Men. *N*  
20 *Engl J Med.* 2016;374(7):611-624. doi:10.1056/NEJMoa1506119.
- 21  
22 45. Millar AC, Lau ANC, Tomlinson G, et al. Predicting low testosterone in aging men: a systematic  
23 review. *Can Med Assoc J.* 2016:cmaj.150262. doi:10.1503/cmaj.150262.
- 24  
25 46. *Standardizing Hormone Measurements.*  
26 [https://www.cdc.gov/labstandards/pdf/hs/HoSt\\_Brochure.pdf](https://www.cdc.gov/labstandards/pdf/hs/HoSt_Brochure.pdf).
- 27  
28 47. Guyatt G. Problems with Bayesian random effects in network meta-analysis. *Cochrane Colloq.*  
29 2015;Vienna(October 3-7).
- 30  
31  
32  
33  
34  
35  
36  
37  
38  
39  
40  
41  
42  
43  
44  
45  
46  
47  
48  
49  
50  
51  
52  
53  
54  
55  
56  
57  
58  
59  
60

1  
2  
3  
4  
5 **Figure legends**  
6

7 **Figure 1: PRISMA flow diagram showing selection of studies.**  
8  
9

10 **Figure 2: Meta-analysis of the effect of testosterone on quality of life.**  
11

12  
13 **Figure 3: Evidence network for quality of life.** The size of each circle (node) is proportional to the  
14 number of randomly assigned patients and indicates sample size. The number of randomized controlled  
15 trials that contributed to each direct comparison is indicated on the line between nodes. IM =  
16 intramuscular injection, TC = testosterone cypionate, TE = testosterone enanthate, TU = testosterone  
17 undecanoate.  
18  
19  
20  
21  
22  
23  
24

25 **Figure 4: Odds of cardiovascular death associated with the use of any testosterone product v.**  
26 **placebo**  
27  
28  
29  
30  
31  
32  
33  
34  
35  
36  
37  
38  
39  
40  
41  
42  
43  
44  
45  
46  
47  
48  
49  
50  
51  
52  
53  
54  
55  
56  
57  
58  
59  
60

Tables

Table 1: Quality of life – Indirect comparison of testosterone products

|                          | Standardized mean difference (95% confidence interval)* |                        |                        |                        |                        |                        |                        |                                       |                        |                       |                        |                        |                        |                          |                            |  |
|--------------------------|---------------------------------------------------------|------------------------|------------------------|------------------------|------------------------|------------------------|------------------------|---------------------------------------|------------------------|-----------------------|------------------------|------------------------|------------------------|--------------------------|----------------------------|--|
|                          | Placebo                                                 | Patch, 5 mg/d          | Gel 1%, 5 mg/d         | Gel 1%, 50 mg/d        | Gel 1%, 75 mg/d        | Gel 1%, 100 mg/d       | Gel 2%, 60 mg/d        | Oral TU, 160 mg/d                     | IM TU, 1000 mg/ 10 wk  | IM TU, 1000 mg/ 12 wk | IM TE, 250 mg/ 3 wk    | IM TE, 250 mg/ 4 wk    | IM TC, 200 mg/ 4 wk    | IM Sustanon, 100 mg/2 wk | IM Durateston, 250 mg/4 wk |  |
| Patch, 5 mg/d            | -0.33<br>(-0.97, 0.31)                                  | —                      |                        |                        |                        |                        |                        |                                       |                        |                       |                        |                        |                        |                          |                            |  |
| Gel 1%, 5 mg/d           | -0.11<br>(-0.86, 0.64)                                  | 0.21<br>(-0.78, 1.20)  | —                      |                        |                        |                        |                        |                                       |                        |                       |                        |                        |                        |                          |                            |  |
| Gel 1%, 50 mg/d          | -0.32<br>(-0.74, 0.17)                                  | 0.01<br>(-0.76, 0.82)  | -0.20<br>(-1.05, 0.69) | —                      |                        |                        |                        |                                       |                        |                       |                        |                        |                        |                          |                            |  |
| Gel 1%, 75 mg/d          | -0.24<br>(-0.83, 0.34)                                  | 0.09<br>(-0.78, 0.95)  | -0.12<br>(-1.09, 0.82) | 0.08<br>(-0.70, 0.79)  | —                      |                        |                        |                                       |                        |                       |                        |                        |                        |                          |                            |  |
| Gel 1%, 100 mg/d         | -0.19<br>(-0.94, 0.55)                                  | 0.13<br>(-0.84, 1.10)  | -0.08<br>(-1.13, 0.97) | 0.12<br>(-0.78, 0.96)  | 0.04<br>(-0.89, 0.99)  | —                      |                        |                                       |                        |                       |                        |                        |                        |                          |                            |  |
| Gel 2%, 60 mg/d          | -0.29<br>(-1.01, 0.44)                                  | 0.04<br>(-0.93, 1.00)  | -0.17<br>(-1.21, 0.87) | 0.03<br>(-0.85, 0.86)  | -0.05<br>(-0.96, 0.89) | -0.09<br>(-1.12, 0.94) | —                      |                                       |                        |                       |                        |                        |                        |                          |                            |  |
| Oral TU, 160 mg/d        | 0.20<br>(-0.33, 0.74)                                   | 0.53<br>(-0.30, 1.36)  | 0.32<br>(-0.61, 1.24)  | 0.52<br>(-0.21, 1.19)  | 0.44<br>(-0.34, 1.24)  | 0.40<br>(-0.51, 1.31)  | 0.49<br>(-0.41, 1.38)  | —                                     |                        |                       |                        |                        |                        |                          |                            |  |
| IM TU, 1000 mg/10 wk     | -0.21<br>(-0.96, 0.56)                                  | 0.12<br>(-0.87, 1.13)  | -0.09<br>(-1.15, 0.98) | 0.11<br>(-0.80, 0.98)  | 0.03<br>(-0.92, 1.00)  | -0.01<br>(-1.07, 1.06) | 0.08<br>(-0.97, 1.14)  | -0.41<br>(-1.35, 0.53)                | —                      |                       |                        |                        |                        |                          |                            |  |
| IM TU, 1000 mg/12 wk     | <b>-0.48</b><br><b>(-0.84, -0.10)</b>                   | -0.15<br>(-0.89, 0.60) | -0.36<br>(-1.19, 0.48) | -0.16<br>(-0.76, 0.41) | -0.24<br>(-0.91, 0.47) | -0.28<br>(-1.10, 0.55) | -0.19<br>(-1.00, 0.62) | <b>-0.68</b><br><b>(-1.32, -0.02)</b> | -0.27<br>(-1.12, 0.58) | —                     |                        |                        |                        |                          |                            |  |
| IM TE, 250 mg/3 wk       | -0.05<br>(-1.04, 0.94)                                  | 0.28<br>(-0.47, 1.03)  | 0.07<br>(-1.17, 1.30)  | 0.27<br>(-0.85, 1.33)  | 0.19<br>(-0.95, 1.34)  | 0.15<br>(-1.09, 1.37)  | 0.24<br>(-1.00, 1.46)  | -0.25<br>(-1.38, 0.88)                | 0.16<br>(-1.10, 1.40)  | 0.43<br>(-0.63, 1.49) | —                      |                        |                        |                          |                            |  |
| IM TE, 250 mg/4 wk       | 0.08<br>(-0.44, 0.63)                                   | 0.41<br>(-0.41, 1.26)  | 0.20<br>(-0.72, 1.13)  | 0.40<br>(-0.32, 1.09)  | 0.32<br>(-0.44, 1.13)  | 0.28<br>(-0.62, 1.21)  | 0.37<br>(-0.51, 1.28)  | -0.12<br>(-0.86, 0.66)                | 0.29<br>(-0.64, 1.22)  | 0.56<br>(-0.09, 1.22) | 0.13<br>(-0.97, 1.27)  | —                      |                        |                          |                            |  |
| IM TC, 200 mg/4 wk       | 0.12<br>(-1.00, 1.25)                                   | 0.45<br>(-0.83, 1.74)  | 0.24<br>(-1.10, 1.59)  | 0.44<br>(-0.78, 1.64)  | 0.36<br>(-0.89, 1.63)  | 0.32<br>(-1.03, 1.66)  | 0.41<br>(-0.92, 1.74)  | -0.08<br>(-1.32, 1.18)                | 0.33<br>(-1.01, 1.68)  | 0.60<br>(-0.46, 1.67) | 0.17<br>(-1.32, 1.66)  | 0.04<br>(-1.20, 1.28)  | —                      |                          |                            |  |
| IM Sustanon, 100 mg/2 wk | -0.28<br>(-1.17, 0.62)                                  | 0.05<br>(-1.05, 1.14)  | -0.16<br>(-1.32, 1.01) | 0.04<br>(-0.99, 1.02)  | -0.04<br>(-1.10, 1.03) | -0.08<br>(-1.24, 1.09) | 0.01<br>(-1.13, 1.16)  | -0.48<br>(-1.52, 0.57)                | -0.07<br>(-1.24, 1.11) | 0.20<br>(-0.77, 1.16) | -0.23<br>(-1.56, 1.11) | -0.36<br>(-1.42, 0.67) | -0.40<br>(-1.84, 1.02) | —                        |                            |  |
| IM Durateston 250 mg/4wk | -0.37<br>(-1.49, 0.74)                                  | -0.05<br>(-1.33, 1.24) | -0.26<br>(-1.61, 1.09) | -0.06<br>(-1.27, 1.12) | -0.14<br>(-1.37, 1.13) | -0.18<br>(-1.51, 1.16) | -0.08<br>(-1.40, 1.23) | -0.57<br>(-1.81, 0.66)                | -0.17<br>(-1.52, 1.17) | 0.10<br>(-0.95, 1.15) | -0.33<br>(-1.81, 1.17) | -0.46<br>(-1.70, 0.76) | -0.50<br>(-1.52, 0.52) | -0.10<br>(-1.52, 1.33)   | —                          |  |

Note: IM = intramuscular injection, TC = testosterone cypionate, TE = testosterone enanthate, TU = testosterone undecanoate.

\*Random-effects model, with analysis based on mean change from baseline. A negative standardized mean difference indicates improvement in quality of life. Statistically significant changes are indicated by use of bold and colour (green indicates that the row treatment is significantly better than the column treatment), and white indicates no statistically significant difference between treatments.

Table 2: Meta-analysis of adverse events associated with the use of any testosterone compared with placebo

| Outcome                           | No. of RCTs | Treatment duration | Event/no. treated                  | Odds ratio (95% CI)* | I <sup>2</sup> |
|-----------------------------------|-------------|--------------------|------------------------------------|----------------------|----------------|
| Cardiovascular death              | 18          | 12 wk to 36 mo     | Placebo: 4/1851<br>TRT: 9/2088     | 2.15 (0.72, 6.45)    | 11%            |
| Myocardial infarction             | 15          | 12 wk to 36 mo     | Placebo: 10/1613<br>TRT: 6/1915    | 0.43 (0.15, 1.19)    | 34%            |
| Prostate cancer                   | 13          | 12 wk to 36 mo     | Placebo: 11/1649<br>TRT: 12/1877   | 0.97 (0.43, 2.23)    | 0%             |
| Stroke                            | 8           | 12 wk to 36 mo     | Placebo: 8/1103<br>TRT: 8/1104     | 0.99 (0.37, 2.65)    | 29%            |
| Heart disease                     | 3           | 40 wk to 12 mo     | Placebo: 5/120<br>TRT: 5/131       | 0.89 (0.24 to 3.26)  | 0%             |
| Erythrocytosis                    | 4           | 12 wk to 12 mo     | Placebo: 0/78<br>TRT: 4/110        | 2.44 (0.26, 22.53)   | 0%             |
| Diabetes                          | 0           | —                  | —                                  | —                    | —              |
| Serious adverse events            | 18          | 12 wk to 36 mo     | Placebo: 181/1902<br>TRT: 168/2138 | 0.88 (0.70, 1.11)    | 0%             |
| Withdrawals due to adverse events | 48          | 12 wk to 36 mo     | Placebo: 150/2551<br>TRT: 221/2840 | 1.31 (0.98, 1.73)    | 13%            |

Note: CI = confidence interval, RCT = randomized controlled trial, TRT = testosterone replacement therapy.  
\*Random-effects models.





PRISMA flow diagram showing selection of studies.

165x117mm (300 x 300 DPI)

Review only

1  
2  
3  
4  
5  
6  
7  
8  
9  
10  
11  
12  
13  
14  
15  
16  
17  
18  
19  
20  
21  
22  
23  
24  
25  
26  
27  
28  
29  
30  
31  
32  
33  
34  
35  
36  
37  
38  
39  
40  
41  
42  
43  
44  
45  
46  
47  
48  
49  
50  
51  
52  
53  
54  
55  
56  
57  
58  
59  
60



Meta-analysis of the effect of testosterone on quality of life.

76x37mm (300 x 300 DPI)

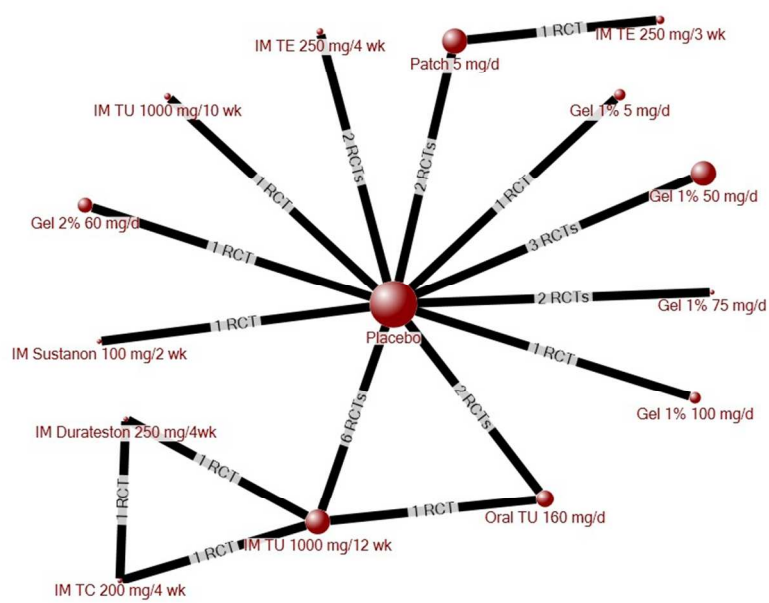

Figure 3: Evidence network for quality of life. The size of each circle (node) is proportional to the number of randomly assigned patients and indicates sample size. The number of randomized controlled trials that contributed to each direct comparison is indicated on each line. IM = intramuscular injection, TC = testosterone cypionate, TE = testosterone enanthate, TU = testosterone undecanoate.

89x57mm (300 x 300 DPI)

Review only

1  
2  
3  
4  
5  
6  
7  
8  
9  
10  
11  
12  
13  
14  
15  
16  
17  
18  
19  
20  
21  
22  
23  
24  
25  
26  
27  
28  
29  
30  
31  
32  
33  
34  
35  
36  
37  
38  
39  
40  
41  
42  
43  
44  
45  
46  
47  
48  
49  
50  
51  
52  
53  
54  
55  
56  
57  
58  
59  
60



Odds of cardiovascular death associated with the use of any testosterone product v. placebo

70x35mm (300 x 300 DPI)

review only

## Supplementary Online Content:

### Elliott et al. Testosterone replacement therapies in hypogonadal men: a systematic review and network meta-analysis

#### Appendix 1: Search strategy

The search was originally executed on June 3, 2014 and updated May 25, 2017.

Testosterone Replacement Therapy  
Primary Studies - Final Strategies  
2014 Jun 3

Database: Embase Classic+Embase <1947 to 2014 June 02>, Ovid MEDLINE(R) In-Process & Other Non-Indexed Citations and Ovid MEDLINE(R) <1946 to Present> Search Strategy:

-----

- 1 exp Testosterone/aa, ad, ae, tu (9143)
- 2 Testosterone Congeners/ad, ae, tu (391)
- 3 exp Testosterone/ and Hormone Replacement Therapy/ (4361)
- 4 exp Androgens/ and Hormone Replacement Therapy/ (5792)
- 5 (testosteron\* adj3 (replac\* or substitut\* or supplement\* or therap\* or treatment\* or buccal or cream\$1 or gel or gels or implant\* or inject\* or oral\* or patch\* or transdermal\*)).tw. (20369)
- 6 (androgen\* adj (replac\* or substitut\* or supplement\* or therap\* or treatment\* or cream\$1 or gel or gels or implant\* or inject\* or patch\*)).tw. (6312)
- 7 (androgen\* adj3 (buccal\* or oral\* or transdermal\*)).tw. (632)
- 8 TRT.tw. (2125)
- 9 (testosterone adj (beta cyclopentylpropionate or cyclopentylpropionate or cipionate or cypionate or enanthate or enanthane or ethanate or heptonate or heptylate or oenanthate or undecanoate or undecylate or "17 undecylate")).tw. (2636)
- 10 ("8-Isotestosterone" or andriol or "andro 100" or "androgyn LA" or androderm or androfort or androgel or androlin or andronaq or andropatch or androsorb or androstenolone or androtardyl or androtest or androtop or andrusol or axiron).tw. (1095)
- 11 ("Bio-T-Gel" or Ciclosterone or "Cristerona T" or "Cristerone T" or CompleoTRT or "CP 601B" or Delatestryl or Depandro or Deposteron or Depostomead or Depo-Testosterone or Depotest or Depovirin or Depoviron or Delatestryl or Duratest or Durathate or Everone or "first-testosterone" or Fortesta or Rortigel or Hexanecarboxylate or Histerone or Homosteron\* or Intrinsa or Jenasteron or LibiGel or Livensa or Malerone or Malogen or Malogex or Mertestate).tw. (492)
- 12 (Nasobol or Nebido or "Neo-Hombreol F" or "Neo-testis" or Neotestis or "NSC 9700" or Opterone or Oreton or "Oreton-F" or Orquisteron).tw. (292)
- 13 (Pantestone or Perandren or Percutacrine androgenique or Percutacrine androgine or Pertestis or Primotest or Primoteston or Relibra or Restandol or Sterotate or Striant or Sustanon\$1 or "Sustason 250" or Synandrol).tw. (674)
- 14 (Teslen or "Testa-C" or Testamone or Testandron or Testaqua or Testosterone or Testex or Testiculosterone or Testim or Testo Enant or Testobase or Testoderm or Testogel or Testoject-50 or Testolin or Testoluton or Testopel or Testopropon or Testosteroid).tw. (691)
- 15 (Testostosterone or Testoviron or Testrin or Testro or Testrone or Theramex or Tostrelle or Testryl or Tostrex or Trans-Testosterone).tw. (604)
- 16 (UNII-3XMK78S470 or Undestor or Virilon or Virormone or Virosterone or Vogelxo).tw. (61)
- 17 or/1-16 (39453)
- 18 exp Animals/ not (exp Animals/ and Humans/) (8702141)
- 19 17 not 18 (25517)
- 20 (controlled clinical trial or randomized controlled trial).pt. (457659)
- 21 clinical trials as topic.sh. (169995)
- 22 (randomi#ed or randomly or RCT\$1 or placebo\*).tw. (1423548)
- 23 ((singl\* or doubl\* or trebl\* or tripl\*) adj (mask\* or blind\* or dumm\*)).tw. (296647)
- 24 trial.ti. (292735)
- 25 or/20-24 (1829141)
- 26 19 and 25 (3594)
- 27 (comment or editorial or interview or letter or news).pt. (2802584)
- 28 26 not 27 (3546)
- 29 (control\* adj2 trial\*).tw. (323672)
- 30 (nonrandom\* or non-random\* or quasi-random\* or quasi-experiment\*).tw. (73609)
- 31 (nRCT or nRCTs or non-RCT\$1).tw. (647)
- 32 (control\* adj3 ("before and after" or "before after")).tw. (6046)
- 33 time series.tw. (33994)
- 34 (pre- adj3 post-).tw. (110642)
- 35 (pretest adj3 posttest).tw. (6260)

Supplemental Online Content: Elliott et al. Testosterone therapy in hypogonadal men:  
a systematic review and network meta-analysis.

For peer review only - <http://bmjopen.bmj.com/site/about/guidelines.xhtml>

1  
 2  
 3 36 (control\* adj2 stud\$3).tw. (346641)  
 4 37 Control Groups/ (74764)  
 5 38 (control\$ adj2 group\$1).tw. (752277)  
 6 39 or/29-38 (1509227)  
 7 40 19 and 39 (2115)  
 8 41 40 not 27 (2097)  
 9 42 exp Cohort Studies/ (1517558)  
 10 43 cohort\$1.tw. (675350)  
 11 44 Retrospective Studies/ (837256)  
 12 45 (longitudinal or prospective or retrospective).tw. (1721897)  
 13 46 ((followup or follow-up) adj (study or studies)).tw. (89267)  
 14 47 Observational study.pt. (2469)  
 15 48 (observation\$2 adj (study or studies)).tw. (111012)  
 16 49 ((population or population-based) adj (study or studies or analys#s)).tw. (26131)  
 17 50 ((multidimensional or multi-dimensional) adj (study or studies)).tw. (187)  
 18 51 Comparative Study.pt. (1676994)  
 19 52 ((comparative or comparison) adj (study or studies)).tw. (185742)  
 20 53 or/42-52 (4729450)  
 21 54 19 and 53 (3389)  
 22 55 54 not 27 (3352)  
 23 56 28 or 41 or 55 (6587)  
 24 57 56 use prmz (3219) [ALL MEDLINE RECORDS]  
 25 58 28 use prmz (1720) [MEDLINE RCTS]  
 26 59 41 use prmz (845) [MEDLINE NON-RCTS]  
 27 60 55 use prmz (1837) [MEDLINE OBSERV]  
 28 61 androgen therapy/ (3539)  
 29 62 androgen deficiency/dt (507)  
 30 63 testosterone undecanoate/ (1591)  
 31 64 testosterone cipionate/ (871)  
 32 65 testosterone enantate/ (2439)  
 33 66 (testosteron\* adj3 (replac\* or substitut\* or supplement\* or therap\* or treatment\* or buccal or cream\$1 or gel or gels or implant\* or inject\* or oral\*  
 34 or patch\* or transdermal\*)).tw. (20369)  
 35 67 (androgen\* adj (replac\* or substitut\* or supplement\* or therap\* or treatment\* or cream\$1 or gel or gels or implant\* or inject\* or patch\*)).tw. (6312)  
 36 68 (androgen\* adj3 (buccal\* or oral\* or transdermal\*)).tw. (632)  
 37 69 TRT.tw. (2125)  
 38 70 (testosterone adj (beta cyclopentylpropionate or cyclopentylpropionate or cipationate or cypionate or enanthate or enanthane or ethanate or  
 39 heptonate or heptylate or oenanthate or undecanoate or undecylate or "17 undecylate")).tw. (2636)  
 40 71 ("8-Isotestosterone" or andriol or "andro 100" or "androgyn LA" or androderm or androfort or androgel or androlin or andronaq or andropatch or  
 41 androsorb or androstenolone or androtardyl or androtest or androtop or andrusol or axiron).tw. (1095)  
 42 72 ("Bio-T-Gel" or Ciclosterone or "Cristerona T" or "Cristerone T" or CompleoTRT or "CP 601B" or Delatestryl or Depandro or Deposteron or  
 43 Depostomead or Depo-Testosterone or Depotest or Depovirin or Depoviron or Delatestryl or Duratest or Durathate or Everone or "first-testosterone" or  
 44 Fortesta or Rortigel or Hexanecarboxylate or Histerone or Homosteron\* or Intrinsa or Jenasteron or LibiGel or Livensa or Malerone or Malogen or Malogex  
 45 or Mertestate).tw. (492)  
 46 73 (Nasobol or Nebido or "Neo-Hombreol F" or "Neo-testis" or Neotestis or "NSC 9700" or Ofterone or Oreton or "Oreton-F" or Orquisteron).tw. (292)  
 47 74 (Pantestone or Perandren or Percutacrine androgenique or Percutacrine androgine or Pertestis or Primotest or Primoteston or Relibra or Restandol or  
 48 Sterotate or Striant or Sustanon\$1 or "Sustason 250" or Synandrol).tw. (674)  
 49 75 (Teslen or "Testa-C" or Testamone or Testandrone or Testaqua or Testerone or Testex or Testiculosterone or Testim or Testo Enant or Testobase or  
 50 Testoderm or Testogel or Testoject-50 or Testolin or Testoluton or Testopel or Testopropon or Testosteroid).tw. (691)  
 51 76 (Testostosterone or Testoviron or Testrin or Testro or Testrone or Theramex or Tostrelle or Testryl or Tostrex or Trans-Testosterone).tw. (604)  
 52 77 (UNII-3XMK78S470 or Undestor or Virilon or Virormone or Viosterone or Vogelxo).tw. (61)  
 53 78 or/61-77 (33099)  
 54 79 randomized controlled trial/ or controlled clinical trial/ (936519)  
 55 80 exp "clinical trial (topic)"/ (104828)  
 56 81 (randomi#ed or randomly or RCT\$1 or placebo\*).tw. (1423548)  
 57 82 ((singl\* or doubl\* or trebl\* or tripl\*) adj (mask\* or blind\* or dumm\*)).tw. (296647)  
 58 83 trial.ti. (292735)  
 59 84 or/79-83 (1962147)  
 60 85 78 and 84 (4042)  
 86 exp animal experimentation/ or exp models animal/ or exp animal experiment/ or nonhuman/ or exp vertebrate/ (37422531)  
 87 exp humans/ or exp human experimentation/ or exp human experiment/ (28425359)  
 88 86 not 87 (8998814)  
 89 85 not 88 (3544)  
 90 (letter or editorial).pt. (2492646)  
 91 89 not 90 (3515)

Supplemental Online Content: Elliott et al. Testosterone therapy in hypogonadal men:  
 a systematic review and network meta-analysis.

For peer review only - <http://bmjopen.bmj.com/site/about/guidelines.xhtml>

1  
 2  
 3 92 (control\* adj2 trial\*).tw. (323672)  
 4 93 (nonrandom\* or non-random\* or quasi-random\* or quasi-experiment\*).tw. (73609)  
 5 94 (nRCT or nRCTs or non-RCT\$1).tw. (647)  
 6 95 (control\* adj3 ("before and after" or "before after")).tw. (6046)  
 7 96 time series analysis/ (13996)  
 8 97 time series.tw. (33994)  
 9 98 pretest posttest control group design/ (202)  
 10 99 (pre- adj3 post-).tw. (110642)  
 11 100 (pretest adj3 posttest).tw. (6260)  
 12 101 controlled study/ (4336835)  
 13 102 (control\* adj2 stud\$3).tw. (346641)  
 14 103 control group/ (74764)  
 15 104 (control\* adj2 group\$1).tw. (752277)  
 16 105 or/92-104 (5430128)  
 17 106 78 and 105 (7057)  
 18 107 106 not 88 (3849)  
 19 108 107 not 90 (3833)  
 20 109 cohort analysis/ (334727)  
 21 110 cohort\$1.tw. (675350)  
 22 111 retrospective study/ (837256)  
 23 112 longitudinal study/ (153245)  
 24 113 prospective study/ (618128)  
 25 114 (longitudinal or prospective or retrospective).tw. (1721897)  
 26 115 follow up/ (824941)  
 27 116 ((followup or follow-up) adj (study or studies)).tw. (89267)  
 28 117 observational study/ (58475)  
 29 118 (observation\$2 adj (study or studies)).tw. (111012)  
 30 119 population research/ (68859)  
 31 120 ((population or population-based) adj (study or studies or analys#s)).tw. (26131)  
 32 121 ((multidimensional or multi-dimensional) adj (study or studies)).tw. (187)  
 33 122 exp comparative study/ (2694962)  
 34 123 ((comparative or comparison) adj (study or studies)).tw. (185742)  
 35 124 or/109-123 (5973302)  
 36 125 78 and 124 (4650)  
 37 126 125 not 88 (3667)  
 38 127 126 not 90 (3625)  
 39 128 91 or 108 or 127 (7409)  
 40 129 128 use emczd (5052) [ALL EMBASE RECORDS]  
 41 130 91 use emczd (2221) [EMBASE RCTS]  
 42 131 108 use emczd (3091) [EMBASE NON-RCTS]  
 43 132 127 use emczd (2341) [EMBASE OBSERV]  
 44 133 58 or 130 (3941) [MEDLINE/EMBASE RCTS]  
 45 134 remove duplicates from 133 (2771) [UNIQUE RCTS]  
 46 135 134 use prmz (1666) [MEDLINE UNIQUE RCTS]  
 47 136 134 use emczd (1105) [EMBASE UNIQUE RCTS]  
 48 137 59 or 131 (3936) [MEDLINE/EMBASE NON-RCTS]  
 49 138 137 not 133 (1817) [OVERLAP REMOVED]  
 50 139 remove duplicates from 138 (1633) [UNIQUE NON-RCTS]  
 51 140 139 use prmz (264) [MEDLINE UNIQUE NON-RCTS]  
 52 141 139 use emczd (1369) [EMBASE UNIQUE NON-RCTS]  
 53 142 60 or 132 (4178) [MEDLINE/EMBASE OBSERV]  
 54 143 142 not (133 or 137) (2513) [OVERLAP REMOVED]  
 55 144 remove duplicates from 143 (2170) [UNIQUE OBSERV]  
 56 145 144 use prmz (1216) [MEDLINE UNIQUE OBSERV STUDIES]  
 57 146 144 use emczd (954) [EMBASE UNIQUE OBSERV STUDIES]  
 58 147 134 or 139 or 144 (6574) [UNIQUE RECORDS – ALL STUDY TYPES]

Supplemental Online Content: Elliott et al. Testosterone therapy in hypogonadal men:  
a systematic review and network meta-analysis.

For peer review only - <http://bmjopen.bmj.com/site/about/guidelines.xhtml>

1  
2  
3  
4  
5  
6  
7  
8  
9  
10  
11  
12  
13  
14  
15  
16  
17  
18  
19  
20  
21  
22  
23  
24  
25  
26  
27  
28  
29  
30  
31  
32  
33  
34  
35  
36  
37  
38  
39  
40  
41  
42  
43  
44  
45  
46  
47  
48  
49  
50  
51  
52  
53  
54  
55  
56  
57  
58  
59  
60

**eAppendix 2: Scales represented in the analysis of data for each outcome**

|                          |                                                                                          |
|--------------------------|------------------------------------------------------------------------------------------|
| <b>Quality of life</b>   | Aging Males' Symptoms                                                                    |
|                          | Minnesota Living with Heart Failure Questionnaire                                        |
|                          | Quality of Life Specific to Male Erection Difficulties                                   |
|                          | International Prostate Symptoms Score Quality of Life                                    |
|                          | Quality of Life Enjoyment and Satisfaction Questionnaire                                 |
|                          | Questions on Life Satisfaction, health subscale                                          |
|                          | Health Related Quality of Life, sexual function domain SF-36 (total score)               |
| <b>Depression</b>        | Hospital Anxiety and Depression Scale                                                    |
|                          | Beck's Depression Inventory                                                              |
|                          | General Well-Being Index, depressed mood dimension                                       |
|                          | Geriatric Depression Scale                                                               |
|                          | Hamilton Depression Scale                                                                |
| <b>Libido</b>            | International Index of Erectile Function (sexual desire domain)                          |
|                          | Men's Sexual Health Questionnaire (sexual desire domain)                                 |
|                          | Partial Androgen Deficiency in Aging Men (PADAM) Questionnaire                           |
|                          | Psychosexual Daily Questionnaire                                                         |
| <b>Erectile function</b> | International Index of Erectile Function (IIEF-5 or erectile function domain of IIEF-15) |



### eAppendix 3: Included studies\*

\*The list of excluded studies is available from the authors on request.

Note: studies were not evaluated for inclusion on the basis reported outcomes.

1. Agarwal PK, Oefelein MG. Testosterone replacement therapy after primary treatment for prostate cancer. *J Urol*. 2005; 173: 533–6.
2. Agledahl I, Brodin E, Svartberg J, et al. Impact of long-term testosterone treatment on plasma levels of free TFPI and TF-induced thrombin generation ex vivo in elderly men with low testosterone levels. *Thrombo Haemostasis*. 2009; 102: 945.
3. Agledahl I, Hansen JB, Svartberg J. Impact of testosterone treatment on postprandial triglyceride metabolism in elderly men with subnormal testosterone levels. *Scand J Clin Lab Invest* 2008; 68: 641.
4. Alamir MA, Ellenberg SS, Swerdloff RS, et al. The Cardiovascular Trial of the Testosterone Trials: Rationale, design, and baseline data of a clinical trial using computed tomographic imaging to assess the progression of coronary atherosclerosis. *Coronary Artery Disease*. 2016;27:95.
5. Amory JK, Watts NB, Easley KA, et al. Exogenous testosterone or testosterone with finasteride increases bone mineral density in older men with low serum testosterone. *J Clin Endocrinol Metab* 2004; 89: 503–10.
6. Andrade ES, Jr., Clapauch R, Buksman S. Short term testosterone replacement therapy improves libido and body composition. *Arq Bras Endocrinol Metabol* 2009;53:996–1004.
7. Arafa M, Zohdy W, Aboulsoud S, et al. Prevalence of late-onset hypogonadism in men with type 2 diabetes mellitus. *Andrologia* 2012; 44: 756.
8. Arver S, Sinha-Hikim I, Beall G, Guerrero M, Shen R, Bhasin S. Serum dihydrotestosterone and testosterone concentrations in human immunodeficiency virus-infected men with and without weight loss. *J Androl* 1999; 20: 611–8.
9. Atkinson RA, Srinivas-Shankar U, Roberts SA, et al. Effects of testosterone on skeletal muscle architecture in intermediate-frail and frail elderly men. *J Gerontol A Biol Sci Med Sci* 2010; 65: 1215.
10. Aversa A, Bruzziches R, Francomano D, et al. Effects of testosterone undecanoate on cardiovascular risk factors and atherosclerosis in middle-aged men with late-onset hypogonadism and metabolic syndrome: results from a 24-month, randomized, double-blind, placebo-controlled study. *J Sex Med* 2010; 7: 3495.
11. Aversa A, Bruzziches R, Francomano D, Spera G, Lenzi A. Efficacy and safety of two different testosterone undecanoate formulations in hypogonadal men with metabolic syndrome. *J Endocrinol Invest* 2010; 33: 776–3.
12. Aversa A, Bruzziches R, Francomano D, et al. Effects of long-acting testosterone undecanoate on bone mineral density in middle-aged men with late-onset hypogonadism and metabolic syndrome: Results from a 36 months controlled study. *Aging Male* 2012; 15: 96.
13. Aydogdu A, Bolu E, Sonmez A, et al. Effects of three different medications on metabolic parameters and testicular volume in patients with hypogonadotropic hypogonadism: 3-year experience. *Clin Endocrinol* 2013; 79: 243–51.
14. Bachman E, Travison TG, Basaria S, et al. Testosterone induces erythrocytosis via increased erythropoietin and suppressed hepcidin: evidence for a new erythropoietin/hemoglobin set point. *J Gerontol A Biol Sci Med Sci* 2014; 69: 725–735.
15. Basaria S, Coviello AD, Travison TG, et al. Adverse events associated with testosterone administration. *N Engl J Med* 2010; 363: 109–22.
16. Basaria S, Davda MN, Travison TG, Ulloor J, Singh R, Bhasin S. Risk factors associated with cardiovascular events during testosterone administration in older men with mobility limitation. *J Gerontol A Biol Sci Med Sci* 2013; 68: 153–160.
17. Basaria S, Harman SM, Travison TG, et al. Effects of Testosterone Administration for 3 Years on Subclinical Atherosclerosis Progression in Older Men With Low or Low-Normal Testosterone Levels: A Randomized Clinical Trial. *JAMA : the journal of the American Medical Association*. 2015;314:570.
18. Basaria S, Travison TG, Alford D, et al. Effects of testosterone replacement in men with opioid-induced androgen deficiency: a randomized controlled trial. *Pain*. 2015;156:280.

Supplemental Online Content: Elliott et al. Testosterone therapy in hypogonadal men:  
a systematic review and network meta-analysis.

For peer review only - <http://bmjopen.bmj.com/site/about/guidelines.xhtml>

19. Basurto L, Zarate A, Gomez R, Vargas C, Saucedo R, Galvan R. Effect of testosterone therapy on lumbar spine and hip mineral density in elderly men. *Aging Male* 2008; 11: 140–5.
20. Beggs LA, Yarrow JF, Conover CF, et al. Testosterone alters iron metabolism and stimulates red blood cell production independently of dihydrotestosterone. *Am J Physiol Endocrinol Metab* 2014; 307: E456–E461.
21. Behre HM, Tammela TL, Arver S., et al. A randomized, double-blind, placebo-controlled trial of testosterone gel on body composition and health-related quality-of-life in men with hypogonadal to low-normal levels of serum testosterone and symptoms of androgen deficiency over 6 months with 12 months open-label follow-up. *Aging Male* 2012; 15: 198.
22. Bhasin S, Storer TW, Asbel-Sethi N, et al. Effects of testosterone replacement with a nongenital, transdermal system, Androderm, in human immunodeficiency virus-infected men with low testosterone levels. *J Clin Endocrinol Metab* 1998; 83: 3155–62.
23. Bhasin S, Storer TW, Javanbakht M, et al. Testosterone replacement and resistance exercise in HIV-infected men with weight loss and low testosterone levels. *JAMA* 2000; 283: 763–70.
24. Black AM, Day AG, Morales A. The reliability of clinical and biochemical assessment in symptomatic late-onset hypogonadism: Can a case be made for a 3-month therapeutic trial? *BJU International* 2004; 94: 1066–70.
25. Blick G. Optimal diagnostic measures and thresholds for hypogonadism in men with HIV/AIDS: comparison between 2 transdermal testosterone replacement therapy gels. *Postgrad.Med* 2013; 125: 30–9.
26. Borst SE, Yarrow JF, Conover CF, et al. Musculoskeletal and prostate effects of combined testosterone and finasteride administration in older hypogonadal men: a randomized, controlled trial. *Am J Physiol Endocrinol Metab* 2014; 306: E433–E442.
27. Borst SE, Yarrow JF, Fernandez C, et al. Cognitive effects of testosterone and finasteride administration in older Hypogonadal men. *Clin Interv Aging*. 2014; 9: 1327–33.
28. Boyanov MA, Boneva Z, Christov VG. Testosterone supplementation in men with type 2 diabetes, visceral obesity and partial androgen deficiency. *Aging Male* 2003; 6: 1–7.
29. Brock G, Heiselman D, Maggi M, Kim SW, Rodr JM. Effect of Testosterone Solution 2% on Testosterone Concentration, Sex Drive and Energy in Hypogonadal Men: Results of a Placebo Controlled Study. *J Urol*. 2016;195:699.
30. Brockenbrough AT, Dittrich MO, Page ST, Smith T, Stivelman JC, Bremner WJ. Transdermal androgen therapy to augment EPO in the treatment of anemia of chronic renal disease. *Am J Kidney Dis* 2006; 47: 251–62.
31. Budoff MJ, Ellenberg SS, Lewis CE, et al. Testosterone Treatment and Coronary Artery Plaque Volume in Older Men With Low Testosterone. *JAMA : the journal of the American Medical Association*. 2017;317:708.
32. Buisson J. Effects of testosterone supplementation on sexual function in elderly men: Results of a six month randomised, placebo controlled study. *Cahiers de l'Annee Gerontologique* 2010; 2: 144–6.
33. Burnett AL, Kan-Dobrosky N, Miller MG. Testosterone replacement with 1% testosterone gel and priapism: no definite risk relationship. *J Sex Med* 2013; 10: 1151–61.
34. Caminiti G, Volterrani M, Iellamo F, et al. Effect of long-acting testosterone treatment on functional exercise capacity, skeletal muscle performance, insulin resistance, and baroreflex sensitivity in elderly patients with chronic heart failure a double-blind, placebo-controlled, randomized study. *J Am College Cardiol* 2009; 54: 919.
35. Cavallini G, Biagiotti G, Giudice C. Association between Peyronie disease and low serum testosterone levels: detection and therapeutic considerations. *J Androl* 2012; 33: 381.
36. Cavallini G, Caracciolo S, Vitali G, Modenini F, Biagiotti G. Carnitine versus androgen administration in the treatment of sexual dysfunction, depressed mood, and fatigue associated with male aging. *Urology* 2004; 63: 641–6.
37. Cheetham TC, An JJ, Jacobsen SJ, et al. Association of testosterone replacement with cardiovascular outcomes among men with androgen deficiency. *JAMA Internal Medicine*. 2017;177:491.
38. Cherrier MM, Anderson K, Shofer J, Millard S, Matsumoto AM. Testosterone treatment of men with mild cognitive impairment and low testosterone levels. *Am J Alzheimers Dis Other Demen*. 2015;30:421.
39. Chiang HS, Cho SL, Lin YC, Hwang TI. Testosterone gel monotherapy improves sexual function of hypogonadal men mainly through restoring erection: evaluation by IIEF score. *Urology* 2009; 73(4): 762–6.
40. Chiang HS, Hwang TI, Hsui YS, et al. Transdermal testosterone gel increases serum testosterone levels in hypogonadal men in Taiwan with improvements in sexual function. *Int J Impot Res* 2007; 19(4): 411–7.
41. Chillar JJ. Testosterone undecanoate improves lipid profile in patients with type 1 diabetes and hypogonadotrophic hypogonadism. *Endocrine journal*. 2017;63:849.

Supplemental Online Content: Elliott et al. Testosterone therapy in hypogonadal men:  
a systematic review and network meta-analysis.

For peer review only - <http://bmjopen.bmj.com/site/about/guidelines.xhtml>

42. Clague JE, Wu FC, Horan MA. Difficulties in measuring the effect of testosterone replacement therapy on muscle function in older men. *Int J Androl* 1999; 22(4): 261-265.
43. Cunningham GR, Stephens-Shields AJ, Rosen RC, et al. Association of sex hormones with sexual function, vitality, and physical function of symptomatic older men with low testosterone levels at baseline in the testosterone trials. *Journal of Clinical Endocrinology and Metabolism*. 2015;100:1146.
44. Cunningham GR, Stephens-Shields AJ, Rosen RC, et al. Testosterone treatment and sexual function in older men with low testosterone levels. *Journal of Clinical Endocrinology and Metabolism*. 2016;101:3096.
45. Dean JD, Carnegie C, Rodzvilla J, Smith T. Long-term effects of Testim 1% testosterone gel in hypogonadal men. *Rev Urol* 2005; 7(2): 87-94.
46. Debruyne FMJ, Behre HM, Roehrborn CG, et al. Testosterone treatment is not associated with increased risk of prostate cancer or worsening of lower urinary tract symptoms: prostate health outcomes in the Registry of Hypogonadism in Men. *BJU International*. 2017;119:216.
47. Dhindsa S, Ghanim H, Batra M, et al. Insulin Resistance and Inflammation in Hypogonadotropic Hypogonadism and Their Reduction After Testosterone Replacement in Men With Type 2 Diabetes. *Diabetes Care*. 2016;39:82.
48. Dias JP, Melvin D, Shardell M, et al. Effects of transdermal testosterone gel or an aromatase inhibitor on prostate volume in older men. *Journal of Clinical Endocrinology and Metabolism*. 2016;101:1865.
49. Dias JP, Melvin D, Simonsick EM, et al. Effects of aromatase inhibition vs. testosterone in older men with low testosterone: randomized-controlled trial. *Andrology*. 2016;4:33.
50. Dias JP, Shardell MD, Carlson OD, et al. Testosterone vs. aromatase inhibitor in older men with low testosterone: effects on cardiometabolic parameters. *Andrology*. 2017;5:31.
51. Dias JP, Veldhuis JD, Carlson O, et al. Effects of transdermal testosterone gel or an aromatase inhibitor on serum concentration and pulsatility of growth hormone in older men with age-related low testosterone. *Metabolism*. 2017;69:143-147, 2017 Apr.
52. Dobs AS, Meikle AW, Arver S, Sanders SW, Caramelli KE, Mazer NA. Pharmacokinetics, efficacy, and safety of a permeation-enhanced testosterone transdermal system in comparison with bi-weekly injections of testosterone enanthate for the treatment of hypogonadal men. *J Clin Endocrinol Metab* 1999; 84(10): 3469-78.
53. Drinka PJ, Jochen AL, Cuisinier M, Bloom R, Rudman I, Rudman D. Polycythemia as a complication of testosterone replacement therapy in nursing home men with low testosterone levels. *J Am Geriatr Soc* 1995; 43(8): 899-901.
54. Eisenberg ML, Li S, Herder D, Lamb DJ, Lipshultz LI. Testosterone therapy and mortality risk. *Int J Impot Res* 2014; 27:46-8.
55. Emmelot-Vonk MH, Verhaar HJ, Nakhai Pour HR, et al. Effect of testosterone supplementation on functional mobility, cognition, and other parameters in older men: a randomized controlled trial. *JAMA* 2008; 299(1): 39-52.
56. Emmelot-Vonk MH, Verhaar HJ, Nakhai-Pour HR, Grobbee DE, van der Schouw YT. Effect of testosterone supplementation on sexual functioning in aging men: a 6-month randomized controlled trial. *Int J Impot Res* 2009; 21: 129-38.
57. Fennell C, Sartorius G, Ly LP, et al. Randomized cross-over clinical trial of injectable vs. implantable depot testosterone for maintenance of testosterone replacement therapy in androgen deficient men. *Clin Endocrinol* 2010; 73: 102.
58. Ferrando AA, Sheffield-Moore M, Paddon-Jones D, Wolfe RR, Urban RJ. Differential anabolic effects of testosterone and amino acid feeding in older men. *J Clin Endocrinol Metab* 2003; 88:358-62.
59. Ferrando AA, Sheffield-Moore M, Yeckel CW, et al. Testosterone administration to older men improves muscle function: molecular and physiological mechanisms. *Am J Physiol Endocrinol Metab* 2002; 282: E601-E607.
60. Fitts RH, Peters JR, Dillon EL, Durham WJ, Sheffield-Moore M, Urban RJ. Weekly versus monthly testosterone administration on fast and slow skeletal muscle fibers in older adult males. *Journal of Clinical Endocrinology and Metabolism*. 2015;100:E223.
61. Francomano D, Bruzziches R, Barbaro G, et al. Effects of testosterone undecanoate replacement and withdrawal on cardio-metabolic, hormonal and body composition outcomes in severely obese hypogonadal men: A pilot study. *J Endocrinol Invest* 2014; 37: 401-11.
62. Francomano D, Ilacqua A, Bruzziches R, et al. Effects of 5-year treatment with testosterone undecanoate on lower urinary tract symptoms in obese men with hypogonadism and metabolic syndrome. *Urology* 2014; 83: 167.

Supplemental Online Content: Elliott et al. Testosterone therapy in hypogonadal men:  
a systematic review and network meta-analysis.

For peer review only - <http://bmjopen.bmj.com/site/about/guidelines.xhtml>

- 1  
2  
3  
4  
5  
6  
7  
8  
9  
10  
11  
12  
13  
14  
15  
16  
17  
18  
19  
20  
21  
22  
23  
24  
25  
26  
27  
28  
29  
30  
31  
32  
33  
34  
35  
36  
37  
38  
39  
40  
41  
42  
43  
44  
45  
46  
47  
48  
49  
50  
51  
52  
53  
54  
55  
56  
57  
58  
59  
60
63. Francomano D, Lenzi A, Aversa A. Effects of five-year treatment with testosterone undecanoate on metabolic and hormonal parameters in ageing men with metabolic syndrome. *Int J Endocrinol* 2014; 2014: 527470.
  64. Fui MNT, Hoermann R, Prendergast LA, Zajac JD, Grossmann M. Symptomatic response to testosterone treatment in dieting obese men with low testosterone levels in a randomized, placebo-controlled clinical trial. *Int J Obes (Lond)*. 2017;41:420.
  65. Gagliano-Juca T, Icli TB, Pencina KM, et al. Effects of Testosterone Replacement on Electrocardiographic Parameters in Men: Findings From Two Randomized Trials. *Journal of Clinical Endocrinology and Metabolism*. 2017;102:1478.
  66. Gianatti EJ, Dupuis P, Hoermann R, et al. Effect of testosterone treatment on glucose metabolism in men with type 2 diabetes: A randomized controlled trial. *Diabetes Care* 2014; 37: 2098–107.
  67. Gianatti EJ, Dupuis P, Hoermann R, Zajac JD, Grossmann M. Effect of testosterone treatment on constitutional and sexual symptoms in men with type 2 diabetes in a randomized, placebo-controlled clinical trial. *J Clin Endocrinol Metab* 2014; 99: 3821–8.
  68. Gianatti EJ, Hoermann R, Lam Q, Dupuis P, Zajac JD, Grossmann M. Effect of testosterone treatment on cardiac biomarkers in a randomized controlled trial of men with type 2 diabetes. *Clinical Endocrinology*. 2016;84:55.
  69. Giltay EJ, Tishova YA, Mskhalaya GJ, et al. Effects of testosterone supplementation on depressive symptoms and sexual dysfunction in hypogonadal men with the metabolic syndrome. *J Sex Med* 2010; 7: 2572.
  70. Gioia A, Ceccoli L, Ronconi V, et al. Vitamin D levels and bone mineral density: Are LH levels involved in the pathogenesis of bone impairment in hypogonadal men? *J Endocrinol Invest* 2014; 37: 1225–31.
  71. Gooren LJ, Saad F, Haide A, et al. Decline of plasma 5alpha-dihydrotestosterone (DHT) levels upon testosterone administration to elderly men with subnormal plasma testosterone and high DHT levels. *Andrologia* 2008; 40: 298.
  72. Gopal RA, Bothra N, Acharya SV, et al. Treatment of hypogonadism with testosterone in patients with type 2 diabetes mellitus. *Endocr Pract* 2010; 16: 570–6.
  73. Grinspoon S, Corcoran C, Askari H, et al. Effects of androgen administration in men with the AIDS wasting syndrome. A randomized, double-blind, placebo-controlled trial. *Ann Intern Med* 1998; 129: 18–26.
  74. Grinspoon S, Corcoran C, Stanley T, Baaj A, Basgoz N, Klibanski A. Effects of hypogonadism and testosterone administration on depression indices in HIV-infected men. *J Clin Endocrinol Metab* 2000; 85: 60–5.
  75. Guay AT, Perez JB, Fitaihi WA, Vereb M. Testosterone treatment in hypogonadal men: prostate-specific antigen level and risk of prostate cancer. *Endocr Pract* 2000; 6: 132–8.
  76. Hackett G, Cole N, Bhartia M et al; BLAST Study Group. Testosterone replacement therapy improves metabolic parameters in hypogonadal men with type 2 diabetes but not in men with coexisting depression: the BLAST study. *J Sex Med* 2014; 11: 840.
  77. Hackett G, Cole N, Bhartia M, et al. Testosterone replacement therapy with long-acting testosterone undecanoate improves sexual function and quality-of-life parameters vs. placebo in a population of men with type 2 diabetes. *J Sex Med* 2013; 10: 1612.
  78. Hackett G, Cole N, Bhartia M, et al;BLAST Study Group. The response to testosterone undecanoate in men with type 2 diabetes is dependent on achieving threshold serum levels (the BLAST study). *Int J Clin Pract* 2014; 68: 203.
  79. Hajjar RR, Kaiser FE, Morley JE. Outcomes of long-term testosterone replacement in older hypogonadal males: a retrospective analysis. *J Clin Endocrinol Metab* 1997; 82: 3793–6.
  80. Handelsman DJ, Conway AJ, Boylan LM. Table . *J Clin Endocrin Metab* 1990; 71: 216.
  81. Heufelder AE, Saad F, Bunck MC, et al. Fifty-two-week treatment with diet and exercise plus transdermal testosterone reverses the metabolic syndrome and improves glycemic control in men with newly diagnosed type 2 diabetes and subnormal plasma testosterone. *J Androl* 2009; 30: 726.
  82. Hildreth KL, Barry DW, Moreau KL, et al. Effects of testosterone and progressive resistance exercise in healthy, highly functioning older men with low-normal testosterone levels. *J Clin Endocrinol Metab* 2013; 98: 1891–1900.
  83. Ho CC, Tong SF, Low WY, et al. A randomized, double-blind, placebo-controlled trial on the effect of long-acting testosterone treatment as assessed by the Aging Male Symptoms scale. *BJU Int* 2012; 110: 260.
  84. Hohl A, Marques MO, MH Coral, et al. Evaluation of late-onset hypogonadism (andropause) treatment using three different formulations of injectable testosterone. *Arq Bras Endocrinol Metabol* 2009; 53: 989.
  85. Host C, Bojesen A, Frystyk J, Flyvbjerg A, Christiansen JS, Gravholt CH. Effect of sex hormone treatment on circulating adiponectin and subforms in Turner and Klinefelter syndrome. *Eur J Clin Invest* 2010; 40: 211–9.

Supplemental Online Content: Elliott et al. Testosterone therapy in hypogonadal men:  
a systematic review and network meta-analysis.

For peer review only - <http://bmjopen.bmj.com/site/about/guidelines.xhtml>

- 1  
2  
3  
4  
5  
6  
7  
8  
9  
10  
11  
12  
13  
14  
15  
16  
17  
18  
19  
20  
21  
22  
23  
24  
25  
26  
27  
28  
29  
30  
31  
32  
33  
34  
35  
36  
37  
38  
39  
40  
41  
42  
43  
44  
45  
46  
47  
48  
49  
50  
51  
52  
53  
54  
55  
56  
57  
58  
59  
60
86. Huang G, Bhasin S, Tang ER, et al. Effect of testosterone administration on liver fat in older men with mobility limitation: results from a randomized controlled trial. *J Gerontol A Biol Sci Med Sci.* 2013; 68: 954–9.
  87. Huang G, Travison T, Maggio M, Edwards RR, Basaria S. Effects of testosterone replacement on metabolic and inflammatory markers in men with opioid-induced androgen deficiency. *Clinical Endocrinology.* 2016;85:232.
  88. Jin B, Conway AJ, Handelsman DJ. Effects of androgen deficiency and replacement on prostate zonal volumes. *Clinical Endocrinology* 2001; 54: 437–45.
  89. Jockenhovel F, Blum WF, Vogel E, et al. Testosterone substitution normalizes elevated serum leptin levels in hypogonadal men. *J Clin Endo Metabo* 1997; 82: 2510.
  90. Jockenhovel F, Bullmann C, Schubert M, et al. Influence of various modes of androgen substitution on serum lipids and lipoproteins in hypogonadal men. *Metabolism* 1999; 48: 590.
  91. Jockenhovel F, Minnemann T, Schubert M, et al. Comparison of long-acting testosterone undecanoate formulation versus testosterone enanthate on sexual function and mood in hypogonadal men. *Eur J Endocrinol* 2009; 160: 815.
  92. Jockenhovel F, Minnemann T, Schubert M, et al. Timetable of effects of testosterone administration to hypogonadal men on variables of sex and mood. *Aging Male* 2009; 12: 113.
  93. Jockenhovel F, Vogel E, Reinhardt W, et al. Effects of various modes of androgen substitution therapy on erythropoiesis. *Euro J Med Res* 1997; 2: 293.
  94. Jones TH, Arver S, Behre HM, et al. Channer, TIMES2 Investigators. Testosterone replacement in hypogonadal men with type 2 diabetes and/or metabolic syndrome (the TIMES2 study). *Diabetes Care* 2011; 34: 828.
  95. Jung HJ, Shin HS. Effect of Testosterone Replacement Therapy on Cognitive Performance and Depression in Men with Testosterone Deficiency Syndrome. 2016;34:194.
  96. Kacker R, Connors W, Zade J, et al. Bone mineral density and response to treatment in men younger than 50 years with testosterone deficiency and sexual dysfunction or infertility. *J Urology* 2014; 191: 1072–6.
  97. Kalinchenko S, Vishnevskiy EL, Koval AN, Mskhalaya GJ, Saad F. Beneficial effects of testosterone administration on symptoms of the lower urinary tract in men with late-onset hypogonadism: A pilot study. *Aging Male.* 2008; 11: 57–61.
  98. Kalinchenko SY, Tishova Y.A, Mskhalaya GJ, et al. Effects of testosterone supplementation on markers of the metabolic syndrome and inflammation in hypogonadal men with the metabolic syndrome: the double-blinded placebo-controlled Moscow study. *Clin Endocrinol* 2010; 73: 602.
  99. Kang SM, Jang Y, Kim JY, et al. Effect of oral administration of testosterone on brachial arterial vasoreactivity in men with coronary artery disease. *Am J Cardiol* 2002;89: 862–4.
  100. Kaplan AL, Trinh QD, Sun M, et al. Testosterone replacement therapy following the diagnosis of prostate cancer: Outcomes and utilization trends. *J Sex Med* 2014; 11: 1063–70.
  101. Kapoor D, Clarke S, Stanworth R., et al. The effect of testosterone replacement therapy on adipocytokines and C-reactive protein in hypogonadal men with type 2 diabetes. *Eur J Endocrinol* 2007; 156: 595–602.
  102. Kapoor D, Goodwin E, Channer KS, et al. Testosterone replacement therapy improves insulin resistance, glycaemic control, visceral adiposity and hypercholesterolaemia in hypogonadal men with type 2 diabetes. *Eur J Endocrinol* 2006; 154: 899.
  103. Kaufman JM, Miller MG, Garwin JL, et al. Efficacy and safety study of 1.62% testosterone gel for the treatment of hypogonadal men. *J Sex Med* 2011; 8: 2079.
  104. Kenny AM, Kleppinger A, Annis K, et al. Effects of transdermal testosterone on bone and muscle in older men with low bioavailable testosterone levels, low bone mass, and physical frailty. *J Am Geriatr Soc.* 2010; 58: 1134–43.
  105. Konaka H, Sugimoto K, Orikasa H, et al. Effects of long-term androgen replacement therapy on the physical and mental statuses of aging males with late-onset hypogonadism: a multicenter randomized controlled trial in Japan (EARTH Study). *Asian Journal of Andrology.* 2016;18:25.
  106. Kubler A, Schulz G, Cordes U, et al. The influence of testosterone substitution on bone mineral density in patients with Klinefelter's syndrome. *Exp Clin Endocrinol* 1992; 100: 129–32.
  107. Kuhnert B, Byrne M, Simoni M, et al. Testosterone substitution with a new transdermal, hydroalcoholic gel applied to scrotal or non-scrotal skin: a multicentre trial. *Eur J Endocrinol* 2005; 153: 317.
  108. Layton JB, Meier CR, Sharpless JL, Sturmer T, Jick SS, Brookhart MA. Comparative Safety of Testosterone Dosage Forms. *JAMA Intern Med.* 2015;175:1187.

Supplemental Online Content: Elliott et al. Testosterone therapy in hypogonadal men:  
a systematic review and network meta-analysis.

For peer review only - <http://bmjopen.bmj.com/site/about/guidelines.xhtml>

- 1  
2  
3  
4  
5  
6  
7  
8  
9  
10  
11  
12  
13  
14  
15  
16  
17  
18  
19  
20  
21  
22  
23  
24  
25  
26  
27  
28  
29  
30  
31  
32  
33  
34  
35  
36  
37  
38  
39  
40  
41  
42  
43  
44  
45  
46  
47  
48  
49  
50  
51  
52  
53  
54  
55  
56  
57  
58  
59  
60
109. Lu J, Fan J, Zhu J, et al. The prospective and randomized control study of Viagra combined with Andriol in the treatment of ED in the aging male. *Chinese J Androl* 2003; 17: 194.
110. Maggi M, Heiselman D, Knorr J, Iyengar S, Paduch DA, Donatucci CF. Impact of Testosterone Solution 2% on Ejaculatory Dysfunction in Hypogonadal Men. *Journal of Sexual Medicine*. 2017;13:1220.
111. Magnussen LV, Grintborg D, Hermann P, Hougaard DM, Hojlund K, Andersen M. Effect of testosterone on insulin sensitivity, oxidative metabolism and body composition in aging men with type 2 diabetes on metformin monotherapy. *Diabetes Obes Metab*. 2016;18:980.
112. Majzoub A, Shoskes DA. A case series of the safety and efficacy of testosterone replacement therapy in renal failure and kidney transplant patients. *Translational Andrology and Urology*. 2016;5:814.
113. Mark Ng Tang F, Luke AP, Philippe D, et al. Effects of testosterone treatment on body fat and lean mass in obese men on a hypocaloric diet: a randomised controlled trial. *BMC medicine*. 2016:153.
114. Marks LS, Mazer NA, Mostaghel E, et al. Effect of testosterone replacement therapy on prostate tissue in men with late-onset hypogonadism: a randomized controlled trial. *JAMA* 2006; 296: 2351–61.
115. Mathur A, Malkin C, Saeed B, et al. Long-term benefits of testosterone replacement therapy on angina threshold and atheroma in men. *Eur J Endocrinol* 2009; 161: 443.
116. McCullough AR, Khera M, Goldstein I, et al. A multi-institutional observational study of testosterone levels after testosterone pellet (Testopel) insertion. *J Sex Med* 2012; 9: 594.
117. McNicholas TA, Dean JD, Mulder H, Carnegie C, Jones NA. A novel testosterone gel formulation normalizes androgen levels in hypogonadal men, with improvements in body composition and sexual function. *BJU International*. 2003; 91: 69–74.
118. Merza Z, Blumsohn A, Mah PM, et al. Double-blind placebo-controlled study of testosterone patch therapy on bone turnover in men with borderline hypogonadism. *Int J Androl* 2006; 29: 381.
119. Minnemann T, Schubert M, Freude S, et al. Comparison of a new long-acting testosterone undecanoate formulation vs testosterone enanthate for intramuscular androgen therapy in male hypogonadism. *J Endocrinol Invest* 2008; 31: 718.
120. Montano M, Flanagan JN, Jiang L, et al. Transcriptional profiling of testosterone-regulated genes in the skeletal muscle of human immunodeficiency virus-infected men experiencing weight loss. *J Clin Endocrinol Metab*. 2007; 92: 2793–802.
121. Morales A, Black A, Emerson L, Barkin J, Kuzmarov I, Day A. Androgens and sexual function: a placebo-controlled, randomized, double-blind study of testosterone vs. dehydroepiandrosterone in men with sexual dysfunction and androgen deficiency. *Aging Male* 2009; 12: 104–12.
122. Morgentaler A, Benesh JA, Denes BS, Kan-Dobrosky N, Harb D, Miller MG. Factors influencing prostate-specific antigen response among men treated with testosterone therapy for 6 months. *J Sex Med* 2014; 11: 2818–25.
123. Morgunov LI, Denisova IA, Rozhkova TI, et al. Androgenic deficit and its treatment in stroke male patients with diabetes mellitus type II. *Zh Nevrol Psikhiatr Im S S Korsakova* 2011; 111: 21.
124. Muraleedharan V, Marsh H, Kapoor D, Channer KS, Jones TH. Testosterone deficiency is associated with increased risk of mortality and testosterone replacement improves survival in men with type 2 diabetes. *Eur J Endocrinol* 2013; 169(6): 725–33.
125. Nakhai-Pour HR, Grobbee DE, Emmelot-Vonk MH, Bots ML, Verhaar HJ, van der Schouw YT. Oral testosterone supplementation and chronic low-grade inflammation in elderly men: a 26-week randomized, placebo-controlled trial. *Am Heart J* 2007;154(6): 1228.
126. Nasser M, Haider A, Saad F, et al. Testosterone therapy in men with Crohn's disease improves the clinical course of the disease: Data from long-term observational registry study. *Hormone Molecular Biology and Clinical Investigation*. 2015;22:111.
127. O'Connell MD, Roberts SA, Srinivas-Shankar U, et al. Do the effects of testosterone on muscle strength, physical function, body composition, and quality of life persist six months after treatment in intermediate-frail and frail elderly men? *J Clin Endocrinol Metab* 2011; 96: 454.
128. Orengo CA, Fullerton L, Kunik ME. Safety and efficacy of testosterone gel 1% augmentation in depressed men with partial response to antidepressant therapy. *J Geriatr Psychiatry Neurol* 2005; 18: 20–4.
129. Paduch DA, Polzer PK, Ni X, Basaria S. Testosterone Replacement in Androgen-Deficient Men With Ejaculatory Dysfunction: A Randomized Controlled Trial. *Journal of Clinical Endocrinology and Metabolism*. 2015;100:2956.

Supplemental Online Content: Elliott et al. Testosterone therapy in hypogonadal men:  
a systematic review and network meta-analysis.

For peer review only - <http://bmjopen.bmj.com/site/about/guidelines.xhtml>

- 1  
2  
3  
4  
5  
6  
7  
8  
9  
10  
11  
12  
13  
14  
15  
16  
17  
18  
19  
20  
21  
22  
23  
24  
25  
26  
27  
28  
29  
30  
31  
32  
33  
34  
35  
36  
37  
38  
39  
40  
41  
42  
43  
44  
45  
46  
47  
48  
49  
50  
51  
52  
53  
54  
55  
56  
57  
58  
59  
60
130. Page ST, Amory JK, Bowman FD, et al. Exogenous testosterone (T) alone or with finasteride increases physical performance, grip strength, and lean body mass in older men with low serum T. *J Clin Endocrinol Metab* 2005; 90: 1502–10.
  131. Park NC, Yan BQ, Chung JM, Lee KM. Oral testosterone undecanoate (Andriol) supplement therapy improves the quality of life for men with testosterone deficiency. *Aging Male* 2003; 6: 86–93.
  132. Pastuszak AW, Gomez LP, Scovell JM, Khera M, Lamb DJ, Lipshultz LI. Comparison of the Effects of Testosterone Gels, Injections, and Pellets on Serum Hormones, Erythrocytosis, Lipids, and Prostate-Specific Antigen. *Sexual Medicine*. 2015;3:165.
  133. Ramasamy R, Scovell J, Mederos M, Ren R, Jain L, Lipshultz L. Association between Testosterone Supplementation Therapy and Thrombotic Events in Elderly Men. *Urology*. 2015;86:283.
  134. Raynaud JP, Legros JJ, Rollet J, et al. Efficacy and safety of a new testosterone-in-adhesive matrix patch applied every 2 days for 1 year to hypogonadal men. *J Steroid Biochem Mol Biol* 2008; 109: 168.
  135. Reid IR, Wattie DJ, Evans MC, et al. Testosterone therapy in glucocorticoid-treated men. *Arch Intern Med* 1996; 156: 1173.
  136. Resnick SM, Matsumoto AM, Stephens-Shields AJ, et al. Testosterone Treatment and Cognitive Function in Older Men With Low Testosterone and Age-Associated Memory Impairment. *JAMA : the journal of the American Medical Association*. 2017;317:717.
  137. Rhoden EL, Morgentaler A. Influence of demographic factors and biochemical characteristics on the prostate-specific antigen (PSA) response to testosterone replacement therapy. *Int J Impot Res* 2006;18: 201–5.
  138. Ross RJM, Siyambalapitiya S, Jonsson P, Koltowska-Haggstrom M, Gaillard R, Ho K. Cross-sectional analysis of testosterone therapies in hypopituitary men on stable pituitary hormone replacement. *Clin Endocrinol* 2009; 70: 907–13.
  139. Roy CN, Snyder PJ, Stephens-Shields AJ, et al. Association of Testosterone Levels With Anemia in Older Men: A Controlled Clinical Trial. *JAMA Intern Med*. 2017;177:480.
  140. Saad F, Gooren LJ, Haider A, et al. A dose-response study of testosterone on sexual dysfunction and features of the metabolic syndrome using testosterone gel and parenteral testosterone undecanoate. *J Androl* 2008; 29: 102.
  141. Saeedi M, Kosaryan M, Fekri K, et al. A randomized, double-blind, controlled trial of testosterone gel treatment versus vehicle control on the facial hair of young men with beta-thalassemia major. *J Dermatol Treat* 2007; 18: 271.
  142. Santos MRD, Sayegh ALC, Bacurau AVN, et al. Effect of Exercise Training and Testosterone Replacement on Skeletal Muscle Wasting in Patients with Heart Failure with Testosterone Deficiency. *Mayo Clin Proc*. 2016;91:575.
  143. Schubert M, Bullmann C, Minnemann T, et al. Osteoporosis in male hypogonadism: responses to androgen substitution differ among men with primary and secondary hypogonadism. *Hormone Res* 2003; 60: 21.
  144. Schubert M, Minnemann T, Hubler D, et al. Intramuscular testosterone undecanoate: pharmacokinetic aspects of a novel testosterone formulation during long-term treatment of men with hypogonadism. *J Clin Endocrinol Metab* 2004; 89: 5429.
  145. Schwartz JB, Volterrani M, Caminiti G, et al. Effects of testosterone on the Q-T interval in older men and older women with chronic heart failure. *Int J Androl* 2011; 34: e415.
  146. Seftel AD, Mack RJ, Secrest AR, Smith TM. Restorative increases in serum testosterone levels are significantly correlated to improvements in sexual functioning. *J Androl* 2004; 25: 963–72.
  147. Shabsigh R, Kaufman JM, Steidle C, Padma-Nathan H. Randomized study of testosterone gel as adjunctive therapy to sildenafil in hypogonadal men with erectile dysfunction who do not respond to sildenafil alone. *J Urol* 2004; 172: 658–63.
  148. Sheffield-Moore M, Dillon EL, Casperson SL, et al. A randomized pilot study of monthly cycled testosterone replacement or continuous testosterone replacement versus placebo in older men. *J Clin Endocrinol Metab* 2011; 96: E1831–E1837.
  149. Shigehara K, Konaka H, Koh E, et al. Effects of testosterone replacement therapy on nocturia and quality of life in men with hypogonadism: a subanalysis of a previous prospective randomized controlled study in Japan. *Aging Male*. 2015;18:169.
  150. Shigehara K, Konaka H, Koh E, et al. Effects of testosterone replacement therapy on hypogonadal men with osteopenia or osteoporosis: a subanalysis of a prospective randomized controlled study in Japan (EARTH study). *Aging Male*. 2017:1.

Supplemental Online Content: Elliott et al. Testosterone therapy in hypogonadal men:  
a systematic review and network meta-analysis.

For peer review only - <http://bmjopen.bmj.com/site/about/guidelines.xhtml>

151. Shigehara K, Sugimoto K, Konaka H, et al. Androgen replacement therapy contributes to improving lower urinary tract symptoms in patients with hypogonadism and benign prostate hypertrophy: a randomised controlled study. *Aging Male* 2011; 14: 53.
152. Shores MM, Kivlahan DR, Sadak TI, Li EJ, Matsumoto AM. A randomized, double-blind, placebo-controlled study of testosterone treatment in hypogonadal older men with subthreshold depression (dysthymia or minor depression). *J Clin Psychiatry* 2009; 70: 1009–16.
153. Shores MM, Smith NL, Forsberg CW, Anawalt BD, Matsumoto AM. Testosterone treatment and mortality in men with low testosterone levels. *J Clin Endocrinol Metab* 2012; 97: 2050–8.
154. Sih R, Morley JE, Kaiser FE, Perry HM, III, Patrick P, Ross C. Testosterone replacement in older hypogonadal men: a 12-month randomized controlled trial. *J Clin Endocrinol Metab* 1997; 82: 1661–7.
155. Simon D, Charles MA, Lahlou N, et al. Androgen therapy improves insulin sensitivity and decreases leptin level in healthy adult men with low plasma total testosterone: a 3-month randomized placebo-controlled trial. *Diabetes Care* 2001; 24: 2149–51.
156. Sinclair M, Grossmann M, Hoermann R, Angus PW, Gow PJ. Testosterone therapy increases muscle mass in men with cirrhosis and low testosterone: a randomised controlled trial. *J Hepatol*. 2017;65:906.
157. Snyder PJ, Bhasin S, Cunningham GR, et al. Effects of Testosterone Treatment in Older Men. *N Engl J Med*. 2016;374:611.
158. Snyder PJ, Kopperdahl DL, Stephens-Shields AJ, et al. Effect of Testosterone Treatment on Volumetric Bone Density and Strength in Older Men With Low Testosterone: A Controlled Clinical Trial. *JAMA Intern Med*. 2017;177:471.
159. Spitzer M, Basaria S, Travison TG, Davda MN, DeRogatis L, Bhasin S. The effect of testosterone on mood and well-being in men with erectile dysfunction in a randomized, placebo-controlled trial. *Andrology* 2013; 1: 475–82.
160. Spitzer M, Basaria S, Travison TG, et al. Effect of testosterone replacement on response to sildenafil citrate in men with erectile dysfunction: a parallel, randomized trial. *Ann Intern Med* 2012; 157: 681–91.
161. Srinivas-Shankar U, Roberts SA, Connolly MJ, et al. Effects of testosterone on muscle strength, physical function, body composition, and quality of life in intermediate-frail and frail elderly men: a randomized, double-blind, placebo-controlled study. *J Clin Endocrinol Metab* 2010; 95: 639.
162. Stanworth RD, Akhtar S, Channer KS, et al. The role of androgen receptor CAG repeat polymorphism and other factors which affect the clinical response to testosterone replacement in metabolic syndrome and type 2 diabetes: TIMES2 sub-study. *Eur J Endocrinol* 2014; 170: 193.
163. Steidle C, Schwartz S, Jacoby K, et al. AA2500 testosterone gel normalizes androgen levels in aging males with improvements in body composition and sexual function. *J Clin Endocrinol Metab* 2003; 88: 2673–81.
164. Storer TW, Basaria S, Traustadottir T, et al. Effects of testosterone supplementation for 3 years on muscle performance and physical function in older men. *Journal of Clinical Endocrinology and Metabolism*. 2017;102:583.
165. Storer TW, Bhasin S, Travison TG, et al. Testosterone attenuates age-related fall in aerobic function in mobility limited older men with low testosterone. *Journal of Clinical Endocrinology and Metabolism*. 2016;101:2562.
166. Stout M, Tew GA, Doll H, et al. Testosterone therapy during exercise rehabilitation in male patients with chronic heart failure who have low testosterone status: a double-blind randomized controlled feasibility study. *Am Heart J* 2012; 164: 893.
167. Strollo F, Strollo G, More M, et al. Low-intermediate dose testosterone replacement therapy by different pharmaceutical preparations improves frailty score in elderly hypogonadal hyperglycaemic patients. *Aging Male* 2013; 16: 33–7.
168. Sullivan DH, Roberson PK, Johnson LE, et al. Effects of muscle strength training and testosterone in frail elderly males. *Med Sci Sports Exerc* 2005; 37: 1664–72.
169. Svartberg J, Agledahl I, Figenschau Y, et al. Testosterone treatment in elderly men with subnormal testosterone levels improves body composition and BMD in the hip. *Int J Impot Res* 2008; 20: 378.
170. Swerdloff RS, Pak Y, Wang C, et al. Serum Testosterone (T) Level Variability in T Gel-Treated Older Hypogonadal Men: Treatment Monitoring Implications. *Journal of Clinical Endocrinology and Metabolism*. 2015;100:3280.
171. Swerdloff RS, Wang C, Cunningham G, et al. Long-term pharmacokinetics of transdermal testosterone gel in hypogonadal men. *J Clin Endocrinol Metab* 2000; 85: 4500–10.
172. Swerdloff RS, Wang C. Three-year follow-up of androgen treatment in hypogonadal men: preliminary report with testosterone gel. *Aging Male* 2003; 6: 207–11.

Supplemental Online Content: Elliott et al. Testosterone therapy in hypogonadal men:  
a systematic review and network meta-analysis.

For peer review only - <http://bmjopen.bmj.com/site/about/guidelines.xhtml>



- 1  
2  
3  
4  
5  
6  
7  
8  
9  
10  
11  
12  
13  
14  
15  
16  
17  
18  
19  
20  
21  
22  
23  
24  
25  
26  
27  
28  
29  
30  
31  
32  
33  
34  
35  
36  
37  
38  
39  
40  
41  
42  
43  
44  
45  
46  
47  
48  
49  
50  
51  
52  
53  
54  
55  
56  
57  
58  
59  
60
173. Tan RS, Pu SJ. A pilot study on the effects of testosterone in hypogonadal aging male patients with Alzheimer's disease. *Aging Male* 2003; 6: 13–7.
174. Tan WS, Low WY, Ng CJ, et al. Efficacy and safety of long-acting intramuscular testosterone undecanoate in aging men: a randomised controlled study. *BJU Int* 2013; 111: 1130.
175. Taylor F, Levine L. Clomiphene citrate and testosterone gel replacement therapy for male hypogonadism: Efficacy and treatment cost. *J Sex Med* 2010; 7: 269–76.
176. Tenover JS. Effects of testosterone supplementation in the aging male. *J Clin Endocrinol Metab* 1992; 75: 1092–8.
177. Thomson S, Koren G, Van SV, Rieder M, Van Uum SHM. Testosterone concentrations in hair of hypogonadal men with and without testosterone replacement therapy. *Therapeutic Drug Monitor* 2009; 31: 779–82.
178. Tong SF, Ng CJ, Lee BC, et al. Effect of long-acting testosterone undecanoate treatment on quality of life in men with testosterone deficiency syndrome: a double blind randomized controlled trial. *Asian J Androl* 2012; 14: 604.
179. Trabado S, Maione L, Bry-Gaillard H, et al. Insulin-like peptide 3 (INSL3) in men with congenital hypogonadotropic hypogonadism/kallmann syndrome and effects of different modalities of hormonal treatment: A single-center study of 281 patients. *J Clin Endocrinol Metab* 2014; 99: E268–E275.
180. Trabado S, Maione L, Salenave S, et al. Estradiol levels in men with congenital hypogonadotropic hypogonadism and the effects of different modalities of hormonal treatment. *Fertil Steril* 2011; 95: 2324–9.
181. Traish AM, Haider A, Haider KS, Doros G, Saad F. Long-Term Testosterone Therapy Improves Cardiometabolic Function and Reduces Risk of Cardiovascular Disease in Men with Hypogonadism. 2017;1074248417691136.
182. Travison TG, Basaria S, Storer TW, et al. Clinical meaningfulness of the changes in muscle performance and physical function associated with testosterone administration in older men with mobility limitation. *J Gerontol A Biol Sci Med Sci* 2011; 66: 1090–9.
183. van den Bergh JP, Hermus AR, Spruyt AI, Sweep CG, Corstens FH, Smals AG. Bone mineral density and quantitative ultrasound parameters in patients with Klinefelter's syndrome after long-term testosterone substitution. *Osteoporos Int* 2001; 12: 55–62.
184. Vaughan C, Goldstein FC, Tenover JL. Exogenous testosterone alone or with finasteride does not improve measurements of cognition in healthy older men with low serum testosterone. *J Androl* 2007; 28: 875–82.
185. Vigen R, O'Donnell CI, Baron AE, et al. Association of testosterone therapy with mortality, myocardial infarction, and stroke in men with low testosterone levels. *JAMA* 2013; 310: 1829–36.
186. Vignera S, La, Calogero AE, D'Agata R, et al. Testosterone therapy improves the clinical response to conventional treatment for male patients with metabolic syndrome associated to late onset hypogonadism. *Minerva Endocrinologica* 2008; 33: 159.
187. Vignera S, La, Condorelli R, Vicari E, et al. Original immunophenotype of blood endothelial progenitor cells and microparticles in patients with isolated arterial erectile dysfunction and late onset hypogonadism: Effects of androgen replacement therapy. *Aging Male* 2011; 14: 183–9
188. Wang C, Cunningham G, Dobs A, et al. Long-term testosterone gel (AndroGel) treatment maintains beneficial effects on sexual function and mood, lean and fat mass, and bone mineral density in hypogonadal men. *J Clin Endocrinol Metab* 2004; 89: 2085–98.
189. Wang C, Swerdloff RS, Iranmanesh A, et al. Effects of transdermal testosterone gel on bone turnover markers and bone mineral density in hypogonadal men. *Clin Endocrinol* 2001; 54: 739–50.
190. Wang C, Swerdloff RS, Iranmanesh A, et al. Transdermal testosterone gel improves sexual function, mood, muscle strength, and body composition parameters in hypogonadal men. *J Clin Endocrinol Metab* 2000; 85: 2839–53.
191. Wang YJ, Zhan JK, Huang W, et al. Effects of low-dose testosterone undecanoate treatment on bone mineral density and bone turnover markers in elderly male osteoporosis with low serum testosterone. *Int J Endocrinol* 2013: 570413.
192. Wiehle RD, Fontenot GK, Wike J, Hsu K, Nydell J, Lipshultz L. Enclomiphene citrate stimulates testosterone production while preventing oligospermia: A randomized phase II clinical trial comparing topical testosterone. *Fertil Steril* 2014; 102: 720–7.
193. Yaron M, Greenman Y, Rosenfeld JB, et al. Effect of testosterone replacement therapy on arterial stiffness in older hypogonadal men. *Eur J Endocrinol* 2009; 160: 839–46.
194. Yassin A, Salman M, Talib RA, Yassin DJ. Is there a protective role of testosterone against high-grade prostate cancer? Incidence and severity of prostate cancer in 553 patients who underwent prostate biopsy: a prospective data register. *Aging Male*. 2017;()pp:1.

Supplemental Online Content: Elliott et al. Testosterone therapy in hypogonadal men:  
a systematic review and network meta-analysis.

For peer review only - <http://bmjopen.bmj.com/site/about/guidelines.xhtml>

- 1  
2  
3 195. Zhang XW, Liu ZH, Hu XW, et al. Androgen replacement therapy improves psychological distress and health-related  
4 quality of life in late onset hypogonadism patients in Chinese population. *Chin Med J* 2012; 125: 3806–10.  
5  
6 196. Zitzmann M, Depenbusch M, Gromoll J, Nieschlag E. Prostate volume and growth in testosterone-substituted  
7 hypogonadal men are dependent on the CAG repeat polymorphism of the androgen receptor gene: a longitudinal  
8 pharmacogenetic study. *J Clin Endocrinol Metab* 2003; 88: 2049–54.  
9  
10  
11  
12  
13  
14  
15  
16  
17  
18  
19  
20  
21  
22  
23  
24  
25  
26  
27  
28  
29  
30  
31  
32  
33  
34  
35  
36  
37  
38  
39  
40  
41  
42  
43  
44  
45  
46  
47  
48  
49  
50  
51  
52  
53  
54  
55  
56  
57  
58  
59  
60

Supplemental Online Content: Elliott et al. Testosterone therapy in hypogonadal men:  
a systematic review and network meta-analysis.

For peer review only - <http://bmjopen.bmj.com/site/about/guidelines.xhtml>

## eAppendix 4: Characteristics of the included RCTs and NRS

eTable 1: Characteristics of included RCTs that reported at least 1 outcome of interest

| Author, year, page (companion publications)                                                                                                                                   | Population*                                                                                                                                           | Duration | Groups (no. randomized)                        | Age, yr, mean (SD);                         | Baseline Total T, mean (SD), nmol/L          | Industry funding |
|-------------------------------------------------------------------------------------------------------------------------------------------------------------------------------|-------------------------------------------------------------------------------------------------------------------------------------------------------|----------|------------------------------------------------|---------------------------------------------|----------------------------------------------|------------------|
| Dias 2016, p. 1865 (Dias 2017 p.143; Dias 2016, p. 33; Dias 2017, p. 31)                                                                                                      | Older men with low testosterone                                                                                                                       | 12 mo    | 1% Gel, 50 mg/d (16)<br>Placebo (13)           | 72 (SEM 1)<br>72 (SEM 1)                    | 10.4 (1.9)<br>10.5 (2.1)                     | No               |
| Chillaron 2016, p. 849                                                                                                                                                        | T1D                                                                                                                                                   | 22 wk    | IM TU 1000 mg/10 wk (6)<br>Placebo (7)         | 47.9 (7.3)<br>45.2 (11.7)                   | 12.4 (3.5)<br>9.9 (4.5)                      | Yes              |
| Brock 2016, p. 699 (Maggi 2017, p. 1220)                                                                                                                                      | ≥ 1 symptom of testosterone deficiency                                                                                                                | 12 wk    | 2% solution, 60 mg/d (358)<br>Placebo (357)    | 54.7 (10.6)<br>55.9 (11.4)                  | 7.0 (2.3)<br>7.0 (2.3)                       | Yes              |
| Dhindsa 2016, p. 82                                                                                                                                                           | T2DM                                                                                                                                                  | 24 wk    | IM TC, 250 mg/2wk (22)<br>Placebo (22)         | 54.6 (7.9)<br>(NR by group)                 | 8.7 (2.8)<br>(NR by group)                   | No               |
| Konaka 2016, p. 25 (Shigehara 2017, p. 1; Shigehara 2015, p. 169)                                                                                                             | Late onset hypogonadism                                                                                                                               | 52 wk    | IM TE, 250 mg/4 wk (169)<br>No treatment (165) | 65.7 (9)<br>67.6 (9.4)                      | Free T 7.1 (3.2)<br>6.7 (3.5) pg/ml          | No               |
| Magnussen 2016, p. 980                                                                                                                                                        | T2DM                                                                                                                                                  | 24 wk    | 1% gel, 50 mg/d (22)<br>Placebo (21)           | 61 (6)<br>59 (6)                            | 7.1 (95%CI 6.6-11.9)<br>9.4 (95%CI 8.1-12.5) | Yes              |
| Ng Tang Fui 2016, p. 153 (Ng Tang Fui 2017, p. 420)                                                                                                                           | BMI ≥ 30                                                                                                                                              | 56 wk    | IM TU, 1000 mg/10 wk (49)<br>Placebo (51)      | 54.3 (IQR 47.3-59.8)<br>52.8 (IQR47.6-60.1) | 8.2 (2.5)<br>8.4 (2.3)                       | Yes              |
| Sinclair 2016, p. 906                                                                                                                                                         | Cirrhosis                                                                                                                                             | 54 wk    | IM TU, 1000 mg/12 wk (50)<br>Placebo (51)      | 55.5 (IQR 52-60)<br>54.0 (IQR 50-59)        | 9.3 (IQR 3.9-17)<br>9.1 (IQR 2.7-12.7)       | Yes              |
| Snyder 2016 p. 611† (Cunningham 2016, p. 3096; Snyder 2017, p. 471; Roy 2017, p. 480; Resnick 2017, p. 717; Cunningham 2015, p. 1146; Abd Alamir 2016, p. 95; Swerdloff 2015, | Older men with decreased libido or sexual function (Sexual function trial); limited mobility (Physical function trial); low vitality (Vitality trial) | 12 mo    | 1% gel, 50 mg/d (395)<br>Placebo (395)         | 72.1 (5.7)<br>72.3 (5.8)                    | 8.0 (2.2)<br>8.2 (2.3)                       | Mix              |

Supplemental Online Content: Elliott et al. Testosterone therapy in hypogonadal men: a systematic review and network meta-analysis.

For peer review only - <http://bmjopen.bmj.com/site/about/guidelines.xhtml>

|                                                                              |                                      |       |                                                                                 |                                        |                                     |     |
|------------------------------------------------------------------------------|--------------------------------------|-------|---------------------------------------------------------------------------------|----------------------------------------|-------------------------------------|-----|
| <b>p. 3280; Budoff 2017, p. 708)</b>                                         |                                      |       |                                                                                 |                                        |                                     |     |
| <b>Basaria 2015, p. 570 (Storer 2017, p. 583)</b>                            | Older men                            | 3 yr  | 1% gel, 75 mg/d (156)<br>Placebo (152)                                          | 66.9 (5.0)<br>68.3 (5.3)               | 10.7 (2.2)<br>10.7 (2.3)            | Yes |
| <b>Basaria 2015, p. 280 (Huang 2016, p. 232)</b>                             | Opioid-induced hypogonadism          | 12 wk | 1% gel, 50 mg/d (43)<br>Placebo (41)                                            | 48 (9)<br>50 (6)                       | 8.2 (3.4)<br>7.7 (3.0)              | Yes |
| <b>Cherrier 2015, p. 421</b>                                                 | Mild cognitive impairment            | 6 mo  | Gel, 50-100 mg/d (10)<br>Placebo (12)                                           | 70.5 (8.2)                             | 10.7 (3.2)<br>9.8 (2.7)             | Mix |
| <b>Paduch 2015, p.2956</b>                                                   | Ejaculatory dysfunction              | 16 wk | 2% solution, 60 mg/d (36)<br>Placebo (40)                                       | 48.4 (9.8)<br>52.7 (9.3)               | 7.4 (1.9)<br>7.7 (1.8)              | Yes |
| <b>Borst 2014, p. E433</b>                                                   | Hypogonadal                          | 12 mo | Placebo (16)<br>IM TE, 125 mg/wk (14)                                           | 70.8 (9.7)<br>69.2 (8.0)               | 8.5 (10.1)<br>9.2 (11.9)            | Mix |
| <b>Gianatti 2014, p. 2098 (Gianatti 2014, p. 3821; Gianatti 2016, p. 55)</b> | Type 2 diabetes                      | 40 wk | Placebo (43)<br>IM TU, 1000 mg/12 wk (45)                                       | 62 (7.4)<br>62 (8.1)                   | 8.5 (2.8)<br>8.7 (3.0)              | Yes |
| <b>Hackett 2013, p.1891 (Hackett 2013, p. 1612, Hackett 2014)</b>            | T2DM and symptoms of hypogonadism    | 30 wk | Placebo (102)<br>IM TU, 1000 mg/12 wk (97)                                      | 62.0 (9.3)<br>61.2 (10.5)              | 8.9 (3.8)<br>9.2 (3.1)              | Yes |
| <b>Wang 2013, p. 1</b>                                                       | Osteoporosis                         | 24 mo | Placebo (62)<br>Oral TU, 20 mg/d (62)<br>Oral TU, 40 mg/d (62)                  | 68.0 (4.8)<br>68.4 (5.5)<br>68.1 (5.4) | 7.6 (0.7)<br>7.6 (0.9)<br>7.4 (0.8) | No  |
| <b>Behre 2012, p. 198</b>                                                    | AMS score >36                        | 6 mo  | Placebo (179)<br>1% gel, 50 mg/d (183)                                          | 62.1 (6.3)<br>61.9 (6.6)               | 10.6 (2.6)<br>10.4 (2.6)            | Yes |
| <b>Spitzer 2012, p. 681 (Spitzer 2013)</b>                                   | Erectile dysfunction                 | 14 wk | Placebo (70)<br>1% gel, 100 mg/d (70)                                           | 54.6 (8.5)<br>55.1 (8.3)               | 8.8 (2.4)<br>8.6 (2.2)              | No  |
| <b>Stout 2012, p. 893</b>                                                    | Chronic heart failure                | 12 wk | Placebo (20)<br>Sustanon,† 100 mg/2 wk (20)                                     | 65.9 (8.8)<br>68.3 (5.3)               | 11.2 (2.6)<br>10.4 (2.7)            | No  |
| <b>Zhang 2012, p. 3806</b>                                                   | Positive score on ADAM questionnaire | 6 mo  | Vitamin E/C (80)<br>Oral TU, 120 or 160 mg/d (based on T level at baseline)(80) | 61.1 (7.1)<br>59.4 (6.3)               | 7.7 (0.8)<br>8.0 (0.7)              | No  |
| <b>Ho 2011, p. 260 (Tan 2013, Tong 2012)</b>                                 | At least mild AMS symptoms           | 42 wk | Placebo (60)<br>IM TU, 1000 mg/12 wk (60)                                       | 53.0 (8.2)<br>53.4 (7.4)               | 8.9 (2)<br>9.1 (1.8)                | Yes |

Supplemental Online Content: Elliott et al. Testosterone therapy in hypogonadal men: a systematic review and network meta-analysis.

For peer review only - <http://bmjopen.bmj.com/site/about/guidelines.xhtml>

|                                                                                                  |                                                       |          |                                                                   |                             |                                              |     |
|--------------------------------------------------------------------------------------------------|-------------------------------------------------------|----------|-------------------------------------------------------------------|-----------------------------|----------------------------------------------|-----|
| <b>Jones 2011, p. 828 (Stanworth 2014)</b>                                                       | MetS or T2DM with at least 2 symptoms of hypogonadism | 12 mo    | Placebo (112)<br>2% gel, 60 mg/d (108)                            | 59.9 (9.4)<br>59.9 (9.1)    | 9.5 (3.3)<br>9.2 (2.6)                       | Yes |
| <b>Kaufman 2011, p. 2079</b>                                                                     | “otherwise healthy”                                   | 6 mo     | Placebo (40)<br>1.62% gel, 40.5 mg/d (234)                        | 55.5 (10.3)<br>53.6 (9.5)   | 10.2 (NR)<br>9.8 (NR)                        | Yes |
| <b>Sheffield-Moore 2011, p. E1831 (Fitts 2015, p. E223)</b>                                      | Community-dwelling men                                | 5 mo     | Placebo (8)<br>IM TE, 100 mg/wk (8)                               | 65 (3)<br>73 (8)            | 11.8 (2.9)<br>11.9(2.9)                      | No  |
| <b>Shigehara 2011, p. 53</b>                                                                     | Benign prostate hypertrophy                           | 12 mo    | No treatment (26)<br>IM TE, 250 mg/4 wk (26)                      | 68.9 (9.1)<br>72 (6.5)      | Free T<br>6.7 (1.9) pg/ml<br>7.0 (1.7) pg/ml | NR  |
| <b>Aversa 2010, p. 776</b>                                                                       | MetS or T2DM                                          | 6 mo     | Placebo (10)<br>Oral TU 160 mg/d (10)<br>IM TU 1000 mg/12 wk (32) | 55 (5)<br>57 (8)<br>58 (10) | 11.1<br>(NR by group)                        | NR  |
| <b>Aversa 2010, p. 3495</b>                                                                      | MetS or T2DM                                          | 12 mo    | Placebo (10)<br>IM TU, 1000 mg/12wk (40)                          | 57 (8)<br>58 (10)           | 9.0 (1.7)<br>8.33 (2.4)                      | NR  |
| <b>Basaria 2010, p. 109 (Bachman 2014, Huang 2013, Basaria 2013, Travison 2011; Storer 2016)</b> | Limited mobility                                      | 6 mo     | Placebo (103)<br>1% gel, 100 mg/d (106)                           | 74 (5)<br>74 (6)            | 8.2 (2.3)<br>8.7 (2.0)                       | No  |
| <b>Kalinchenko 2010, p. 602 (Giltay 2010)</b>                                                    | MetS                                                  | 30 wk    | Placebo (71)<br>IM TU, 1000 mg/12wk (113)                         | 52.8 (9.67)<br>51.6 (9.76)  | 7.5 (5.2)<br>6.7 (3.0)                       | Yes |
| <b>Kenny 2010, p. 1134</b>                                                                       | Low bone mass and frailty                             | 12–24 mo | Placebo (62)<br>1% gel, 5 mg/d (69)                               | 76.3 (8.0)<br>77.9 (7.3)    | 14.5 (6.7)<br>13.2 (6.2)                     | Mix |
| <b>Srinivas-Shankar 2010, p. 639 (O’Connell 2010, Atkinson 2010)</b>                             | Intermediate-frail and frail                          | 6 mo     | Placebo (136)<br>1% gel, 50 mg/d (138)                            | 73.9 (6.4)<br>73.7 (5.7)    | 10.9 (3.1)<br>11 (3.2)                       | Yes |
| <b>Caminiti 2009, p. 919 (Schwartz 2011)</b>                                                     | Chronic heart failure                                 | 12 wk    | Placebo (35)<br>IM TU, 1000 mg/6 wk (35)                          | 69 (66–74)<br>71 (67–76)    | 7.3 (7.3)<br>8.0 (6.2)                       | No  |
| <b>Chiang 2009, p. 467</b>                                                                       | Hypogonadal                                           | 3 mo     | Placebo (20)<br>1% gel, 50 mg/d (20)                              | NR                          | NR                                           | NR  |
| <b>Emmelot-Vonk, 2009, p. 129 (Emmelot-Vonk</b>                                                  | Moderately low T levels                               | 26 wk    | Placebo (117)<br>Oral TU, 160 mg/d (120)                          | 67.4 (4.9)<br>67.1 (5.0)    | 10.4 (1.9)<br>11.0 (1.9)                     | No  |

Supplemental Online Content: Elliott et al. Testosterone therapy in hypogonadal men: a systematic review and network meta-analysis.

For peer review only - <http://bmjopen.bmj.com/site/about/guidelines.xhtml>

| 2008, Nakhai-Pour<br>2007, Buisson 2010) |                                                |                |                                                                                       |                                               |                                      |     |
|------------------------------------------|------------------------------------------------|----------------|---------------------------------------------------------------------------------------|-----------------------------------------------|--------------------------------------|-----|
| <b>Heufelder 2009, p. 726</b>            | MetS and T2DM                                  | 52 wk          | Placebo (16)<br>1% gel, 50 mg/d (16)                                                  | 55.9 (6)<br>57.3 (5.6)                        | 10.4 (0.8)<br>10.5 (0.8)             | Yes |
| <b>Hohl 2009, p. 989</b>                 | High AMS score                                 | 12 or 14<br>wk | IM TU, 1000 mg/6 wk (10)<br>IM TC, 200 mg/4wk (11)<br>Durateston, IM, 250 mg/4wk (11) | 59.6 (8.9)<br>59.6 (7.1)<br>60.4 (8.8)        | 9.9 (1.1)<br>10.1 (1.1)<br>9.9 (1.5) | No  |
| <b>Mathur 2009, p. 443</b>               | Chronic angina pectoris                        | 12 mo          | Placebo (7)<br>IM TU, 1000 mg/12 wk (8)                                               | 67.8 (7.9)<br>62.1 (5.2)                      | 10.1 (2.8)<br>9.8 (1.9)              | Yes |
| <b>Morales 2009, p. 104</b>              | Sexual dysfunction                             | 4 mo           | Placebo (29)<br>Oral TU, 160 mg/d (29)                                                | 60.2 (9.6)<br>59.0 (10.6)                     | 10.0 (5.5)<br>10.2 (4.9)             | Yes |
| <b>Shores 2009, p. 1009</b>              | Dysthymia or minor depression                  | 12 wk          | Placebo (16)<br>1% gel, 75 mg/d (17)                                                  | 61.7 (7.0)<br>57.1 (5.7)                      | 9.3 (3.4)<br>10.1 (3.7)              | Mix |
| <b>Agledahl 2008, p. 641</b>             | Subnormal total T                              | 52 wk          | Placebo (13)<br>IM TU, 1000 mg/12 wk (14)                                             | 69.3 (5.0)<br>68.9 (5.4)                      | 8.2 (2.4)<br>8.5 (1.7)               | Mix |
| <b>Basurto 2008, p. 140</b>              | Low total T                                    | 12 mo          | Placebo (23)<br>IM TE, 250 mg/3wk (25)                                                | 63.1 (7.7)<br>63.2 (8.5)                      | 10.8 (1.3)<br>10.4 (1.1)             | No  |
| <b>Raynaud 2008, p. 168</b>              | Hypogonadal                                    | 6 mo           | Patch, 4.8 mg/d(188)<br>IM TE, 250 mg/3 wk (36)                                       | 42.0 (12.7)<br>40.7 (10.5)                    | 4.6 (3.2)<br>5.1 (3.3)               | Yes |
| <b>Svartberg 2008, p. 378</b>            | NR                                             | 12 mo          | Placebo (19)<br>IM TU, 1000 mg/12 wk (19)                                             | 69 (5)<br>69 (5)                              | 8.2 (2.1)<br>8.4 (1.7)               | Mix |
| <b>Chiang 2007, p. 411</b>               | Hypogonadal                                    | 3 mo           | Placebo (20)<br>1% gel, 50 mg/d (20)                                                  | 56.1 (14.6)<br>47.9 (17.0)                    | 9.1 (6.9)<br>7.4 (5.6)               | Yes |
| <b>Brockenbrough 2006, p. 251</b>        | Hemodialysis-dependent end-stage renal disease | 6 mo           | Placebo (21)<br>1% gel, 100 mg/d (19)                                                 | 53.0 (17.2)<br>58.9 (14.9)                    | 7.0 (3.0)<br>7.6 (2.2)               | Yes |
| <b>Marks 2006, p. 2351</b>               | Symptoms of LOH                                | 6 mo           | Placebo (22)<br>IM TE, 150 mg/2wk (22)                                                | 68 (NR)<br>70 (NR)                            | 8.7 (1.6)<br>7.7 (1.4)               | Mix |
| <b>Merza 2006, p. 381</b>                | Sexual dysfunction                             | 6 mo           | Placebo (19)<br>Patch, 5 mg/d (20)                                                    | 59.7 (10.2)<br>63.0 (9.0)                     | 7.5 (2.5)<br>8.4 (3.3)               | Yes |
| <b>Kuhnert 2005, p. 317</b>              | Primary, secondary, LOH                        | 24 wk          | Patch, 5 mg/d (52)<br>2.5%, gel, 125 mg/d (56)<br>2.5%, scrotal gel, 25 mg/d (54)     | 53 (IQR 16)<br>52.2 (IQR 22.5)<br>50 (IQR 21) | NR                                   | Yes |

Supplemental Online Content: Elliott et al. Testosterone therapy in hypogonadal men:  
a systematic review and network meta-analysis.

For peer review only - <http://bmjopen.bmj.com/site/about/guidelines.xhtml>

|                                                                                    |                                                                     |       |                                                                                       |                                                        |                                                  |     |
|------------------------------------------------------------------------------------|---------------------------------------------------------------------|-------|---------------------------------------------------------------------------------------|--------------------------------------------------------|--------------------------------------------------|-----|
|                                                                                    | and symptoms of T deficiency                                        |       |                                                                                       |                                                        |                                                  |     |
| <b>Orengo 2005, p. 20</b>                                                          | Treatment-resistant depression                                      | 12 wk | Placebo (5)<br>1% gel, 50 mg/d (7)                                                    | 63 (8.5) (NR by group)                                 | 8.9 (1.7)<br>10.2 (2.3)                          | No  |
| <b>Amory 2004, p. 503 (Page 2005, Vaughan 2007)</b>                                | T below the range of normal for young adult men                     | 36 mo | Placebo (24)<br>IM TE 200 mg/2wk (24)                                                 | 71 (4)<br>71 (4)                                       | 10.1 (2.1)<br>9.9 (1.6)                          | No  |
| <b>Cavallini 2004, p. 641</b>                                                      | Symptoms of androgen decline                                        | 6 mo  | Placebo (45)<br>Oral TU, 160 mg/d (40)                                                | 63 (NR)<br>64 (NR)                                     | 10.5 (2.1)<br>9.9 (1.8)                          | No  |
| <b>Schubert 2004, p. 5429 (Jockenhovel 2009, Jockenhovel 2009, Minnemann 2008)</b> | Primary or secondary hypogonadism                                   | 30 wk | IM TU, 1000 mg/9 wk (20)<br>IM TE, 250 mg/3 wk (20)                                   | 41.1 (13.4)<br>36.3 (12.3)                             | 3.9 (4.4)<br>2.7 (2.3)                           | Mix |
| <b>Shabsigh 2004, p. 658 (Burnett 2013, Wang 2001, Swerdloff 2000)</b>             | Erectile dysfunction not responsive to sildenafil                   | 12 wk | Placebo (36)<br>1% gel, 50 mg/d (39)                                                  | 59.1 (9.4)<br>56.8 (10.2)                              | 65% had T < 10.4 (NR by group)                   | Yes |
| <b>Boyanov 2003, p. 1</b>                                                          | T2DM, obesity, and "symptoms of andropause or erectile dysfunction" | 3 mo  | No treatment (24)<br>Oral TU, 120 mg/d (24)                                           | All: 57.5 (4.8) (NR by group)                          | 10.76 (11.20)<br>9.56 (2.33)                     | NR  |
| <b>McNicholas 2003, p. 69</b>                                                      | ≥ 1 symptoms of "low T"                                             | 90 d  | Patch, 5 mg/d (68)<br>1% gel, 50 mg/d (68)<br>1% gel, 100 mg/d (72)                   | 57.9 (10.2)<br>59.0 (9.5)<br>56.7 (10.3)               | 7.90 (2.2)<br>7.95 (2.2)<br>7.92 (2.4)           | Yes |
| <b>Steidle 2003, p. 2673 (Seftel 2004)</b>                                         | ≥ 1 symptoms of "low T"                                             | 90 d  | Placebo (99)<br>Patch, 5 mg/d (102)<br>1% gel, 50 mg/d (99)<br>1% gel, 100 mg/d (106) | 56.8 (10.8)<br>60.5 (9.7)<br>58.1 (9.7)<br>56.8 (10.6) | 7.9 (2.8)<br>8.3 (2.4)<br>8.1 (2.0)<br>8.1 (2.1) | Yes |
| <b>Tan 2003, p. 13</b>                                                             | Alzheimer's disease                                                 | 12 mo | Placebo (5)<br>IM TE, 200mg/2wk (5)                                                   | 68.9 (NR)<br>72.4 (NR)                                 | NR<br>3.6 (NR)                                   | No  |
| <b>Ferrando 2002, p. 358 (Ferrando 2003)</b>                                       | "Healthy older men"                                                 | 6 mo  | Placebo (5)<br>IM TE 50–400 mg/wk (7)                                                 | 67 (6.7)<br>68 (7.9)                                   | 9.8 (4.3)<br>12.4 (4.4)                          | No  |

Supplemental Online Content: Elliott et al. Testosterone therapy in hypogonadal men: a systematic review and network meta-analysis.

For peer review only - <http://bmjopen.bmj.com/site/about/guidelines.xhtml>

|                                                                   |                                          |       |                                                                           |                                           |                                                |     |
|-------------------------------------------------------------------|------------------------------------------|-------|---------------------------------------------------------------------------|-------------------------------------------|------------------------------------------------|-----|
| <b>Kang 2002, p. 862</b>                                          | Coronary artery disease                  | 12 wk | Placebo (17)<br>Oral TU, 160 mg/d (18)                                    | 58 (9)<br>57 (7)                          | Free T,<br>13.8 (1.8) pg/ml<br>9.9 (3.1) pg/ml | NR  |
| <b>Simon 2001, p. 2149</b>                                        | Healthy adult men                        | 3 mo  | Placebo (6)<br>Gel, 125 mg/d (6)                                          | 55.4 (3.6)<br>52.8 (4.2)                  | 9.4 (1.0)<br>8.3 (0.3)                         | NR  |
| <b>Bhasin 2000, p. 763</b>                                        | HIV-infected with weight loss            | 16 wk | Placebo (14)<br>IM TE, 100 mg/wk (17)                                     | 41.8 (9.4)<br>40.8 (4.9)                  | 6.1 (2.9)<br>7.1 (3.0)                         | No  |
| <b>Wang 2000, p. 2839</b>                                         | Primary, secondary or LOH                | 90 d  | Patch, 5 mg/d (76)<br>1% gel, 50 mg/d (76)<br>1% gel, 100 mg/d (78)       | 51.1 (NR)<br>51.3 (NR)<br>51.0 (NR)       | 8.2 (4.8)<br>8.2 (4.6)<br>8.6 (4.8)            | Mix |
| <b>Clague 1999, p. 261</b>                                        | Community-living                         | 3 mo  | Placebo (7)<br>IM TE, 200 mg/2wk (7)                                      | 65.3 (1.8)<br>68.1 (6.6)                  | 11.6 (0.9)<br>11.3 (1.7)                       | No  |
| <b>Dobs 1999, p. 3469</b>                                         | Receiving TRT for at least 3 mo          | 24 wk | Patch, 5 mg/d (33)<br>IM TE, 200 mg/2wk (33)                              | 44.3 (11.1)<br>44.9 (11.6)                | 5.8 (2.7)<br>6.3 (3.3)                         | Mix |
| <b>Bhasin 1998, p. 3155 (Arver 1999)</b>                          | HIV                                      | 12 wk | Placebo (21)<br>Patch, 5 mg/d (20)                                        | NR                                        | 7.3 (2.9)<br>9.0 (1.7)                         | Mix |
| <b>Grinspoon 1998, p. 18 (Grinspoon 2000)</b>                     | AIDS wasting syndrome                    | 6 mo  | Placebo (26)<br>IM TE, 300 mg/3wk (26)                                    | 44 (9)<br>40 (7)                          | 10.1 (6.4)<br>11.3 (5.4)                       | No  |
| <b>Jockenhovel 1997, p. 2510</b>                                  | Primary or secondary androgen deficiency | 12 wk | IM TE, 250 mg/3 wk (10)<br>Pellets, 1200 mg (12)                          | 30.0 (7.3)<br>36.3 (11.1)                 | 1.6 (1.3)<br>1.9 (1.1)                         | NR  |
| <b>Jockenhovel 1997, p. 293 (Jockenhovel 1999, Schubert 2001)</b> | Primary or secondary androgen deficiency | 210 d | Oral TU, 160 mg/d (13)<br>IM TE, 250 mg/3wk (15)<br>Pellets, 1200 mg (15) | 34.5 (14.1)<br>31.8 (10.1)<br>35.8 (10.4) | 2.9 (1.4)<br>2.3 (2.3)<br>2.7 (1.5)            | NR  |
| <b>Sih 1997, p. 1661</b>                                          | Community-dwelling healthy men           | 12 mo | Placebo (15)<br>IM TC, 200 mg/2wk (17)                                    | 68 (6)<br>65 (7)                          | 8.1 (0.7)<br>10.2 (0.9)                        | NR  |

Note: ADAM = Androgen Deficiency of the Aging Male, AMS = Aging Males' Symptoms [scale], CI = confidence interval, IM = intramuscular, IQR = interquartile range, LOH = late onset hypogonadism, MetS = metabolic syndrome, NR = not reported, SD = standard deviation, T = testosterone, T1D = type 1 diabetes, T2DM = type 2 diabetes mellitus, TC = testosterone cypionate, TE = testosterone enanthate, TRT = testosterone replacement therapy, TU = testosterone undecanoate.

\*All RCTs involved men that were either described as hypogonadal and met the cut-off for hypogonadism (total T < 12 nmol/L or free T < 225 pmol/L) or reported total or free T below these cut-off points.

†The Testosterone Trials were a coordinated set of seven trials. In order to enroll, participants had to qualify for at least one of the Sexual Function Trial, Physical Function Trial, or the Vitality Trial (NCT00799617).

‡Blend of testosterone propionate, testosterone phenylpropionate, testosterone isocaproate, and testosterone decanoate.

Supplemental Online Content: Elliott et al. Testosterone therapy in hypogonadal men:  
a systematic review and network meta-analysis.

For peer review only - <http://bmjopen.bmj.com/site/about/guidelines.xhtml>



For peer review only

Supplemental Online Content: Elliott et al. Testosterone therapy in hypogonadal men:  
a systematic review and network meta-analysis.

For peer review only - <http://bmjopen.bmj.com/site/about/guidelines.xhtml>

1  
2  
3  
4  
5  
6  
7  
8  
9  
10  
11  
12  
13  
14  
15  
16  
17  
18  
19  
20  
21  
22  
23  
24  
25  
26  
27  
28  
29  
30  
31  
32  
33  
34  
35  
36  
37  
38  
39  
40  
41  
42  
43  
44  
45  
46  
47  
48  
49

eTable 2: Characteristics of included non-randomized studies that reported at least one outcome of interest

| Study                             | Population*                                                                    | Duration                                   | Group<br>(no. in group)                                                                                                | Age, yr, mean<br>(SD)                    | Baseline total T,<br>mean (SD), nmol/L† | Industry<br>funding |
|-----------------------------------|--------------------------------------------------------------------------------|--------------------------------------------|------------------------------------------------------------------------------------------------------------------------|------------------------------------------|-----------------------------------------|---------------------|
| <b>Retrospective cohort</b>       |                                                                                |                                            |                                                                                                                        |                                          |                                         |                     |
| <b>Cheetham<br/>2017, p. 491</b>  | ≥ 40 yr with documented<br>androgen deficiency                                 | Follow-up: 4.4<br>years (mean)             | TRT (injection, oral, topical), dose NR<br>(8,808)<br>Never TRT (35,527)                                               | 58.4 (NR)<br>59.8 (NR)                   | TRT group: 7.4<br>(IQR 5.5-8.8)**       | No                  |
| <b>Layton 2015,<br/>p. 1187</b>   | New users of TRT‡                                                              |                                            | Gel (114,918)<br>Injection (111,354)<br>Patch (9,906)                                                                  | Range: 52.4 (15.1)<br>to 72.7 (6.7)§     | NR††                                    | No                  |
| <b>Pastuszak<br/>2015, p. 165</b> | New TRT users or had<br>been off TRT for ≥ 3 or<br>mo                          | 26.2 (10.6)<br>29.8 (8.8)<br>28.2 (8.6) mo | Gel (1% 50–100 mg/d and 1.62%<br>20.25–80.1 mg/d) (47)<br>IM TE or TC, 100–200mg/wk (57)<br>Pellets, 75 mg/3–6 mo (74) | 54.1 (9.8)<br>42.5 (12.3)<br>53.8 (13.0) | 10.4 (3.1)<br>10.6 (5.7)<br>9.3 (5.8)   | No                  |
| <b>Ramasamy<br/>2016</b>          | ≥ 65 yr and ≥3<br>hypogonadal symptoms                                         | 3.4-3.8 yr                                 | TRT, dose NR (153)<br>No treatment (64)                                                                                | 74 (6.3)<br>75(6)                        | NR                                      | NR                  |
| <b>Aydogdu<br/>2013, p. 243</b>   | IHH                                                                            | 24 wk                                      | Sustanon, ¶ IM 250 mg/3wk (28)<br>1% gel, 50 mg/d (24)                                                                 | 20.9 (1.4)<br>21.3 (1.6)                 | 0.9 (0.6)<br>1.4 (1.3)                  | No                  |
| <b>Vigen 2013,<br/>p. 1829</b>    | Men who underwent<br>coronary angiography at a<br>VA medical centre            | Follow-up: 840<br>d (mean)                 | TRT, dose NR (1223)<br>No treatment (7486)                                                                             | 60.6 (7.6)<br>63.8 (9.0 yr)              | 6.1 (2.2)<br>7.2 (2.6)                  | NR                  |
| <b>Shores 2012,<br/>p. 2050</b>   | > 40 yr treated at a VA<br>medical center                                      | 20.2 (16.7) mo                             | TRT, dose NR (398)<br>No treatment (633)                                                                               | 62.1 (10.6)                              | 5.6 (2.2)<br>6.7 (1.9)                  | No                  |
| <b>Rhoden 2006,<br/>p. 201</b>    | Hypogonadal men with<br>negative prostate biopsy<br>prior to initiation of TRT | 12 mo                                      | IM TRT, dose NR (33)<br>1% gel, dose NR (25)                                                                           | 58.3                                     | 10.3 (5.4)<br>10.2 (3.1)                | No                  |
| <b>Guay 2000,<br/>p. 132</b>      | Men with ED and<br>primary or secondary<br>hypogonadism                        | 2-3 mo                                     | IM TE, 200–300 mg/2-3 wk (25)<br>Patch, 5 mg/d (16)                                                                    | 40–80                                    | Free T:<br>8.1–9.7 pg/ml                | NR                  |
| <b>Hajjar 1997,<br/>p. 3793</b>   | Elderly men                                                                    | 24 mo                                      | IM TE or TC, IM 200 mg/2 wk (45)<br>No treatment (27)                                                                  | 71.8 (SE 1.7)<br>69.9 (SE 1.9)           | 10.8 (4.7)<br>9.6 (3.8)                 | NR                  |
| <b>Prospective cohort</b>         |                                                                                |                                            |                                                                                                                        |                                          |                                         |                     |

Supplemental Online Content: Elliott et al. Testosterone therapy in hypogonadal men:  
a systematic review and network meta-analysis.

For peer review only - <http://bmjopen.bmj.com/site/about/guidelines.xhtml>

|                                                  |                                                                  |             |                                                                               |                            |                                           |     |
|--------------------------------------------------|------------------------------------------------------------------|-------------|-------------------------------------------------------------------------------|----------------------------|-------------------------------------------|-----|
| <b>Debruyne 2017, p. 216</b>                     | ≥18 years with a diagnosis of hypogonadism                       | 36 mo       | TRT, dose NR (750)<br>No TRT (249)                                            | 58.9 (10.3)<br>59.7 (11.1) | 8.3 (3.9)<br>9.4 (3.7)                    | Yes |
| <b>Traish 2016, p. 1</b>                         | Symptoms of hypogonadism                                         | Up to 8 yr  | IM TU, 1000 mg/12wk (360)<br>No TRT (296)                                     | 57.4 (7.3)<br>64.8 (4.3)   | 9.8 (1.3)<br>9.6 (1.2)                    | Yes |
| <b>Yassin 2017, p. 1</b>                         | Treated or untreated hypogonadal men                             | 6 yr        | TRT, dose NR (42)<br>No treatment (162)                                       | 61.3 (4.7)                 | ≤ 12.1<br>7.1 (2.3)                       | NR  |
| <b>Jung 2016, p. 194</b>                         | Symptoms of hypogonadism                                         | 8 mo        | TU, 1000 mg/3 mo + lifestyle modification (54)<br>Lifestyle modification (52) | 56.7 (12.6)<br>57.8 (11.4) | 8.7 (2.1)<br>9 (2.4)                      | No  |
| <b>Francomano 2014, p. 401</b>                   | Severely obese men (mean BMI 42) with ≥ symptoms of hypogonadism | 54 wk       | DPE (12)<br>DPE + IM TU, 1000 mg/12 wk (12)                                   | 53 (8)<br>56 (9)           | 8.2 (1.8)<br>8.5 (1.8)                    | NR  |
| <b>Blick 2013, p. 30</b>                         | HIV/AIDS                                                         | 12 mo       | 1% gel (Androgel), 50 mg/d (92)<br>1% gel (Testim), 50 mg/d (75)              | 49.5 (8.1)                 | 13.9 (5.5)††<br>13.7 (7.2)                | Yes |
| <b>Aversa 2012, p. 96</b>                        | Middle-aged men with LOH and MetS                                | 36 mo       | IM TU, 1000 mg/12 wk (40)<br>No treatment (20)                                | 58 (10)<br>57 (8)          | 8.3 (2.4)                                 | NR  |
| <b>Dean 2005, p. 87</b>                          | 21–81 yr                                                         | Up to 12 mo | 1% gel, 50 mg/d (NR)<br>1% gel, 100 mg/d (NR)                                 | 58.5 (10.0)                | 8.1 (2.1)                                 | NR  |
| <b>Wang 2004, p. 2085 (Swerdloff 2003 p.207)</b> | 19–68 yr                                                         | 36 mo       | 1% gel, 50 mg/d (NR)<br>1% gel, 75 mg/d (NR)<br>1% gel, 100 mg/d (NR)         | 51.5 (0.9)                 | 14.1 (1.3) ¶¶<br>22.4 (2.7)<br>25.6 (2.4) | No  |

Note: DPE = diet plus exercise, ED = erectile dysfunction, IHH = Idiopathic hypogonadotropic hypogonadism, IM = intramuscular, IQR = interquartile range, LOH = late-onset hypogonadism, MetS = metabolic syndrome, NR = not reported, SE = standard error, SD = standard deviation, T = testosterone, TC = testosterone cypionate, TE = testosterone enanthate, TRT = testosterone replacement therapy, VA = Veterans Affairs.

\*All studies involved men that were either described as hypogonadal and met the cut-off for hypogonadism (total T < 12 nmol/L or free T < 225 pmol/L) or reported total or free T below these cut-off points.

†Unless otherwise stated.

‡Full cohort includes patients with testosterone levels in the normal range; data extracted only for patients with total testosterone < 300 ng/dl (10.4 nmol/L).

¶Blend of testosterone propionate, testosterone phenylpropionate, testosterone isocaproate, and testosterone decanoate.

§Data provided separately for 3 databases. Range represents the high and low ages (SD) across the three databases.

\*\*Baseline testosterone level not reported for the never-TRT group. In both the TRT group and the no TRT group, 98%–99% of patients were reported to have total T < 10.4 nmol/L at baseline.

††Mean total testosterone level not provide among patients with a “low” testosterone level (< 10.4 nmol/L).

‡‡Study eligibility was total T < 300 ng/dl or free T < 50 pg/ml.

¶¶Long term extension of an included RCT (Wang 2000). Total testosterone levels reported here are after 6 months of TRT treatment in the RCT.

Supplemental Online Content: Elliott et al. Testosterone therapy in hypogonadal men:  
a systematic review and network meta-analysis.

For peer review only - <http://bmjopen.bmj.com/site/about/guidelines.xhtml>

**eTable 3: Risk of bias of included randomized controlled trials that reported at least one outcome of interest**

| Author, year          | Adequate sequence generation | Allocation concealment | Blinding of outcome assessment (objective outcomes) | Blinding of outcome assessment (subjective outcomes) | Incomplete outcome data addressed (efficacy outcomes) | Incomplete outcome data addressed (harm outcomes) |
|-----------------------|------------------------------|------------------------|-----------------------------------------------------|------------------------------------------------------|-------------------------------------------------------|---------------------------------------------------|
| Dias 2016             | Low                          | Unclear                | Low                                                 | Low                                                  | High                                                  | Unclear                                           |
| Chillarón 2016        | Unclear                      | Low                    | Low                                                 | Unclear                                              | Low                                                   | Low                                               |
| Brock 2016            | Low                          | Low                    | Low                                                 | Low                                                  | Low                                                   | Low                                               |
| Dhindsa 2016          | Unclear                      | Unclear                | Low                                                 | Unclear                                              | High                                                  | Unclear                                           |
| Konaka 2016           | Low                          | Unclear                | Low                                                 | High                                                 | High                                                  | Unclear                                           |
| Magnussen 2016        | Low                          | Low                    | Low                                                 | Low                                                  | Low                                                   | Low                                               |
| Ng Tang Fui 2016      | Low                          | Low                    | Low                                                 | Low                                                  | High                                                  | Unclear                                           |
| Sinclair 2016         | Unclear                      | Low                    | Low                                                 | Low                                                  | High                                                  | High                                              |
| Snyder 2016           | Low                          | Low                    | Low                                                 | Low                                                  | Low                                                   | Low                                               |
| Basaria 2015, p. 570  | Unclear                      | Unclear                | Low                                                 | Low                                                  | High                                                  | Unclear                                           |
| Basaria 2015, p. 280  | Low                          | Unclear                | Low                                                 | Low                                                  | High                                                  | Unclear                                           |
| Cherrier 2015         | Unclear                      | Unclear                | Low                                                 | Unclear                                              | Low                                                   | Low                                               |
| Paduch 2015           | Low                          | Low                    | Low                                                 | Unclear                                              | Low                                                   | Low                                               |
| Gianatti 2014         | Unclear                      | Low                    | Low                                                 | Low                                                  | Low                                                   | Low                                               |
| Borst 2014            | Low                          | Unclear                | Low                                                 | High                                                 | High                                                  | High                                              |
| Hackett 2013          | Unclear                      | Low                    | Low                                                 | Low                                                  | Low                                                   | Low                                               |
| Wang 2013             | Unclear                      | Unclear                | Low                                                 | NA                                                   | Low                                                   | High                                              |
| Behre 2012            | Low                          | Low                    | Low                                                 | Low                                                  | Low                                                   | High                                              |
| Spitzer 2012          | Unclear                      | Low                    | Low                                                 | Low                                                  | Low                                                   | Low                                               |
| Stout 2012            | Unclear                      | Unclear                | NA                                                  | Low                                                  | High                                                  | High                                              |
| Zhang 2012            | Unclear                      | Low                    | Low                                                 | High                                                 | Low                                                   | Low                                               |
| Ho 2011               | Unclear                      | Low                    | Low                                                 | Low                                                  | Low                                                   | Low                                               |
| Jones 2011            | Unclear                      | Unclear                | Low                                                 | Low                                                  | High                                                  | High                                              |
| Kaufman 2011          | Unclear                      | Low                    | Low                                                 | Low                                                  | High                                                  | Low                                               |
| Sheffield-Moore 2011  | Unclear                      | Low                    | Low                                                 | NA                                                   | Low                                                   | High                                              |
| Shigehara 2011        | Unclear                      | Unclear                | Low                                                 | High                                                 | Low                                                   | Low                                               |
| Aversa 2010, p. 776   | Unclear                      | Unclear                | Low                                                 | Low                                                  | Unclear                                               | Unclear                                           |
| Aversa 2010, p. 3495  | Unclear                      | Unclear                | Low                                                 | Low                                                  | Low                                                   | Low                                               |
| Basaria 2010          | Low                          | Low                    | Low                                                 | Low                                                  | Low                                                   | Unclear                                           |
| Kalinchenko 2010      | Unclear                      | Low                    | Low                                                 | Low                                                  | Low                                                   | Low                                               |
| Kenny 2010            | Unclear                      | Low                    | Low                                                 | Low                                                  | High                                                  | Unclear                                           |
| Srinivas-Shankar 2010 | Low                          | Low                    | Low                                                 | Low                                                  | Low                                                   | Unclear                                           |
| Caminiti 2009         | Unclear                      | Low                    | Low                                                 | Low                                                  | Low                                                   | Low                                               |
| Chiang 2009           | Unclear                      | Unclear                | Low                                                 | Low                                                  | High                                                  | High                                              |

Supplemental Online Content: Elliott et al. Testosterone therapy in hypogonadal men: a systematic review and network meta-analysis.

For peer review only - <http://bmjopen.bmj.com/site/about/guidelines.xhtml>

|                                                                                                                                                                                                         |         |         |         |         |         |         |
|---------------------------------------------------------------------------------------------------------------------------------------------------------------------------------------------------------|---------|---------|---------|---------|---------|---------|
| <b>Emmelot-Vonk 2009</b>                                                                                                                                                                                | Low     | Low     | Low     | Low     | Low     | Low     |
| <b>Heufelder 2009</b>                                                                                                                                                                                   | Low     | Unclear | Low     | High    | Low     | Low     |
| <b>Hohl 2009</b>                                                                                                                                                                                        | High    | High    | Low     | High    | Low     | Low     |
| <b>Mathur 2009</b>                                                                                                                                                                                      | Low     | Unclear | Low     | Low     | Low     | High    |
| <b>Morales 2009</b>                                                                                                                                                                                     | Low     | Low     | Low     | Low     | Low     | Low     |
| <b>Shores 2009</b>                                                                                                                                                                                      | Low     | Low     | Low     | Low     | High    | Unclear |
| <b>Agledahl 2008</b>                                                                                                                                                                                    | Unclear | Unclear | Low     | NA      | Low     | Low     |
| <b>Basurto 2008</b>                                                                                                                                                                                     | Low     | Low     | Low     | Low     | Low     | Unclear |
| <b>Raynaud 2008</b>                                                                                                                                                                                     | Unclear | Unclear | Low     | High    | High    | High    |
| <b>Svartberg 2008</b>                                                                                                                                                                                   | Unclear | Unclear | Low     | Low     | Low     | Unclear |
| <b>Chiang 2007</b>                                                                                                                                                                                      | Unclear | Unclear | Low     | Unclear | High    | Low     |
| <b>Brockenbrough 2006</b>                                                                                                                                                                               | Unclear | Low     | Low     | Unclear | High    | Low     |
| <b>Marks 2006</b>                                                                                                                                                                                       | Unclear | Unclear | Low     | Low     | Low     | Low     |
| <b>Merza 2005</b>                                                                                                                                                                                       | Unclear | Unclear | Low     | Unclear | Low     | Low     |
| <b>Kuhnert 2005</b>                                                                                                                                                                                     | Unclear | Low     | Low     | High    | High    | High    |
| <b>Orengo 2005</b>                                                                                                                                                                                      | Low     | Unclear | Low     | Unclear | High    | High    |
| <b>Amory 2004</b>                                                                                                                                                                                       | Low     | Low     | Low     | Low     | Unclear | Unclear |
| <b>Cavallini 2004</b>                                                                                                                                                                                   | Unclear | Unclear | Low     | Unclear | Unclear | High    |
| <b>Schubert 2004</b>                                                                                                                                                                                    | Low     | Unclear | Low     | High    | Unclear | Low     |
| <b>Shabsigh 2004</b>                                                                                                                                                                                    | Low     | Unclear | Low     | Low     | Low     | Unclear |
| <b>Boyanov 2003</b>                                                                                                                                                                                     | Unclear | Unclear | Low     | High    | Low     | Low     |
| <b>McNicholas 2003</b>                                                                                                                                                                                  | Unclear | Unclear | Low     | High    | High    | High    |
| <b>Steidle 2003</b>                                                                                                                                                                                     | Unclear | Unclear | Low     | High    | High    | High    |
| <b>Tan 2003</b>                                                                                                                                                                                         | Unclear | Unclear | Unclear | High    | Low     | Low     |
| <b>Ferrando 2002</b>                                                                                                                                                                                    | Unclear | Unclear | Low     | NA      | Low     | Low     |
| <b>Kang 2002</b>                                                                                                                                                                                        | Unclear | Unclear | Low     | NA      | Low     | Low     |
| <b>Simon 2001</b>                                                                                                                                                                                       | Unclear | Unclear | Low     | Low     | NA      | Low     |
| <b>Bhasin 2000</b>                                                                                                                                                                                      | Low     | Unclear | Low     | Unclear | Low     | Unclear |
| <b>Wang 2000</b>                                                                                                                                                                                        | Unclear | Unclear | Low     | High    | High    | High    |
| <b>Clague 1999</b>                                                                                                                                                                                      | Unclear | Unclear | Low     | NA      | Low     | Low     |
| <b>Dobs 1999</b>                                                                                                                                                                                        | Unclear | Low     | Low     | High    | High    | Unclear |
| <b>Bhasin 1998</b>                                                                                                                                                                                      | Unclear | Unclear | Low     | Unclear | High    | Unclear |
| <b>Grinspoon 1998</b>                                                                                                                                                                                   | Low     | Low     | Low     | Low     | High    | Unclear |
| <b>Jockenhovel 1997, p. 2510</b>                                                                                                                                                                        | Unclear | Unclear | Low     | NA      | Unclear | Unclear |
| <b>Jockenhovel 1997, p. 293</b>                                                                                                                                                                         | Unclear | Unclear | Low     | NA      | Low     | Unclear |
| <b>Sih 1997</b>                                                                                                                                                                                         | Low     | Unclear | Low     | Unclear | High    | Unclear |
| Note: Risk of bias was not assessed for the studies that reported no outcomes of interest or that did not provide usable data (e.g., cross-over studies without first period data reported separately). |         |         |         |         |         |         |

**eTable 4: SIGN50 assessment of included non-randomized studies that reported at least one outcome of interest.** Overall assessment was based on consideration of all domains of the SIGN50 Methodology checklist for cohort studies.

| Study*                 | Overall assessment† | Comments                                                                                                                                                                                                                                                                                                                                                                                                                                                    |
|------------------------|---------------------|-------------------------------------------------------------------------------------------------------------------------------------------------------------------------------------------------------------------------------------------------------------------------------------------------------------------------------------------------------------------------------------------------------------------------------------------------------------|
| <b>Traish 2017</b>     | Unacceptable (–)    | Prospective cohort. Study “not designed or powered to address the effects of [TRT] on mortality in men with hypogonadism.” Control group comprised men who opted against TRT. Did not adjust for previous CV events, and groups were not balanced at baseline for some factors. Unclear from where participants were recruited and whether outcome assessment was blinded to exposure status. Outcomes assessed for up to 8 years.                          |
| <b>Jung 2016</b>       | Unacceptable (–)    | Prospective cohort. Did not report how study participants were assigned to treatment groups. Unblinded, with 8 month treatment and follow-up                                                                                                                                                                                                                                                                                                                |
| <b>Debruyne 2017</b>   | Acceptable (+)      | Prospective cohort. Multinational registry of treated or untreated newly diagnosed hypogonadal men. Follow-up on 93% of cohort over 3-yr period. Included a wide age range and multiple comorbidities but groups not well balanced across all baseline characteristics. Men with a history of prostate cancer were excluded. Outcome assessment blinded to exposure status.                                                                                 |
| <b>Layton 2015</b>     | Acceptable (+)      | Retrospective cohort. Comparative safety of TRT products grouped by route of administration (no comparison to non-users). Data unavailable for some patient characteristics. Study included a “large diverse patient sample representing men across age groups, populations, treatment and practice patterns, and health care systems.” Unclear whether outcome assessment was blinded to exposure status. Mean treatment duration between 96 and 122 days. |
| <b>Cheetham 2017</b>   | Acceptable (+)      | Retrospective cohort. Cohort entry determined by dispensation of a TRT product. Over 50% of cohort prescribed an intramuscular TRT. Possible confounding by indication, analysis could not adjust for all CV risk factors, and dose and duration of TRT were not considered. Unclear whether outcome assessment was blinded to exposure status. Length of follow up about 1 year longer for no TRT group.                                                   |
| <b>Yassin 2017</b>     | Unacceptable (–)    | Prospective registry. Investigation and biopsy frequency equal in both groups. Outcome assessment not blinded to exposure status. Percentage of cohort for whom data were available not reported. Confounding not considered.                                                                                                                                                                                                                               |
| <b>Pastuszak 2015</b>  | Unacceptable (–)    | Retrospective cohort. Considerable variation in baseline characteristics between groups, and confounding not considered. Outcome assessment not blinded to exposure status. 36 month follow-up.                                                                                                                                                                                                                                                             |
| <b>Ramasay 2015</b>    | Unacceptable (–)    | Retrospective cohort. “All major adverse cardiovascular events were verified by telephone with the patient (or family members if patient died).” Authors did not provide clear description and measurement about the outcomes. Median follow-up 3.8 (TRT) or 3.4 (no TRT) yr. Confounding not considered, and outcome assessment not blinded to exposure status.                                                                                            |
| <b>Francomano 2014</b> | Unacceptable (–)    | Prospective cohort. Obese men with low testosterone. Baseline characteristics were well matched on reported characteristics, but control group had contraindications to TRT. 33% dropout in treatment group, zero in control group; no comparison between those who dropped out or remained in study.                                                                                                                                                       |

|                                                                                                                                                                                                                                                                                                                                                                                                                                                                                                                                                                                                                |                  |                                                                                                                                                                                                                                                                                                                                                                                                               |
|----------------------------------------------------------------------------------------------------------------------------------------------------------------------------------------------------------------------------------------------------------------------------------------------------------------------------------------------------------------------------------------------------------------------------------------------------------------------------------------------------------------------------------------------------------------------------------------------------------------|------------------|---------------------------------------------------------------------------------------------------------------------------------------------------------------------------------------------------------------------------------------------------------------------------------------------------------------------------------------------------------------------------------------------------------------|
| <b>Aydogdu 2013</b>                                                                                                                                                                                                                                                                                                                                                                                                                                                                                                                                                                                            | Acceptable (+)   | Retrospective cohort. Men with IHH. SAE not defined as an outcome but reported that no SAEs were detected for any treatment group.                                                                                                                                                                                                                                                                            |
| <b>Blick 2013</b>                                                                                                                                                                                                                                                                                                                                                                                                                                                                                                                                                                                              | Acceptable (+)   | Prospective cohort. Groups were generally well matched on baseline characteristics with no statistically significant differences (except for study site). Patients in the 2 treatment groups were not followed for an equal length of time (AndroGel: mean 6.1 yr; Testim: mean 1.9 yr). Skin reactions assessed but not reported. Outcome assessment was not blinded to exposure status.                     |
| <b>Vigen 2013</b>                                                                                                                                                                                                                                                                                                                                                                                                                                                                                                                                                                                              | Acceptable (+)   | Retrospective cohort. All-cause mortality assessed via the Veterans Affairs vital status file. Myocardial infarction and ischemic stroke assessed via ICD-9 codes from Veterans Affairs inpatient treatment files. Conclusions based on a composite outcome. Sufficient data not reported to allow analysis of stroke or MI separately at each time point. Outcome assessment not blinded to exposure status. |
| <b>Aversa 2012</b>                                                                                                                                                                                                                                                                                                                                                                                                                                                                                                                                                                                             | Unacceptable (-) | Prospective cohort. Men with multiple sclerosis and late onset hypogonadism. Baseline characteristics were well matched; however, control group was comprised of men who had refused or had contraindications to testosterone. Adherence to treatment over 3 years was 50% in TU group.                                                                                                                       |
| <b>Shores 2012</b>                                                                                                                                                                                                                                                                                                                                                                                                                                                                                                                                                                                             | Acceptable (+)   | Retrospective cohort. Hazard ratio for mortality took person-years of observation into account. Adjusted HR and CIs provided. Outcome assessment not blinded to exposure status. Exposure determined via Veterans Affairs pharmacy records and outcomes ascertained from 2 mortality databases.                                                                                                               |
| <b>Rhoden 2006</b>                                                                                                                                                                                                                                                                                                                                                                                                                                                                                                                                                                                             | Acceptable (+)   | Retrospective cohort. Patients had to have negative prostate biopsy before initiation of TRT, thus excluding any men with pre-existing large volume disease. Type and dose of IM testosterone not reported. Dose of gel not reported (data NR by type). Outcome assessment not blinded to exposure status.                                                                                                    |
| <b>Dean 2005</b>                                                                                                                                                                                                                                                                                                                                                                                                                                                                                                                                                                                               | Unacceptable (-) | Prospective cohort. Poor reporting of the number of patients in each group and which group the safety events occurred in. Number of and reasons for withdrawals not reported. Safety data reported overall but not by treatment group. Outcome assessment not blinded to exposure status.                                                                                                                     |
| <b>Wang 2004</b>                                                                                                                                                                                                                                                                                                                                                                                                                                                                                                                                                                                               | Unacceptable (-) | Prospective cohort (open-label extension of an RCT). The number of men assigned to each group NR. Safety data poorly reported: 3 cases of prostate cancer reported but number of people in each group not reported. Outcome assessment not blinded to exposure status.                                                                                                                                        |
| <b>Guay 2000</b>                                                                                                                                                                                                                                                                                                                                                                                                                                                                                                                                                                                               | Unacceptable (-) | Retrospective cohort. Safety data not reported by treatment group. Outcome assessment not blinded to exposure status.                                                                                                                                                                                                                                                                                         |
| <b>Hajjar 1997</b>                                                                                                                                                                                                                                                                                                                                                                                                                                                                                                                                                                                             | Unacceptable (-) | Retrospective cohort. Data not clearly provided. Safety outcomes were reported based on a subset of people assigned to each group, and it is not clear why the other patients were omitted. Outcome assessment not blinded to exposure status.                                                                                                                                                                |
| <p>Note: CI = confidence interval, ICD-9 = International Classification of Diseases, Ninth Revision, IHH = idiopathic hypogonadotropic hypogonadism, HR = hazard ratio, MI = myocardial infarction, NR = not reported, RCT = randomized controlled trial, SAE = serious adverse events, TRT = testosterone replacement therapy, TU = testosterone undecanoate.</p> <p>*Non-randomized studies that reported at least 1 outcome of interest.</p> <p>†Assessed by use of SIGN50 for cohort studies (<a href="http://www.sign.ac.uk/checklists-and-notes.html">www.sign.ac.uk/checklists-and-notes.html</a>).</p> |                  |                                                                                                                                                                                                                                                                                                                                                                                                               |

eAppendix 5: Funnel plots for assessment of publication bias

A) Quality of life

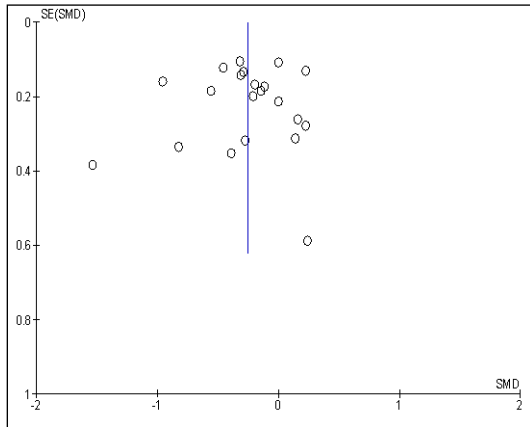

B) Depression

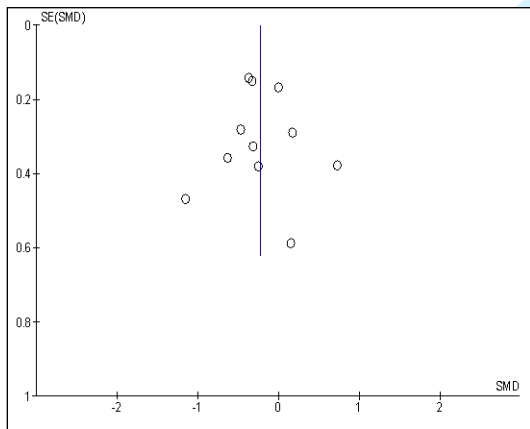

C) Libido



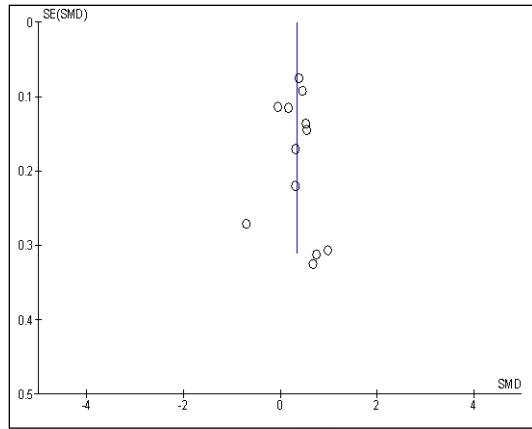

**D) Erectile function**

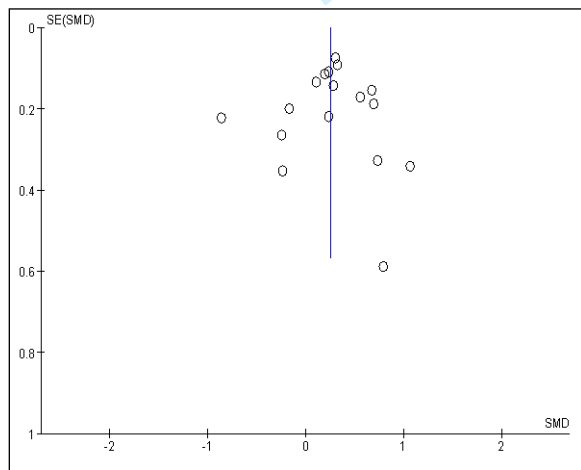

**E) Cardiovascular death**

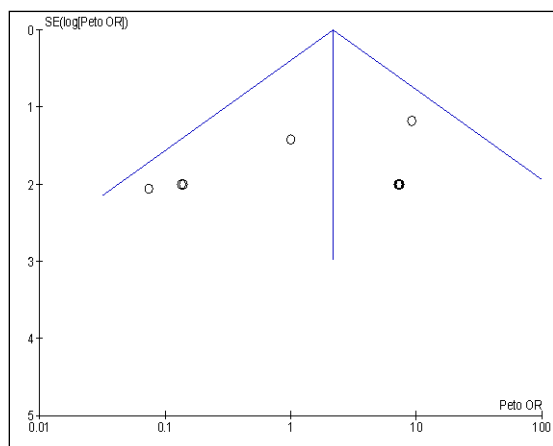

**F) Myocardial infarction**

Supplemental Online Content: Elliott et al. Testosterone therapy in hypogonadal men: a systematic review and network meta-analysis.

For peer review only - <http://bmjopen.bmj.com/site/about/guidelines.xhtml>

review only

1  
2  
3  
4  
5  
6  
7  
8  
9  
10  
11  
12  
13  
14  
15  
16  
17  
18  
19  
20  
21  
22  
23  
24  
25  
26  
27  
28  
29  
30  
31  
32  
33  
34  
35  
36  
37  
38  
39  
40  
41  
42  
43  
44  
45  
46  
47  
48  
49  
50  
51  
52  
53  
54  
55  
56  
57  
58  
59  
60

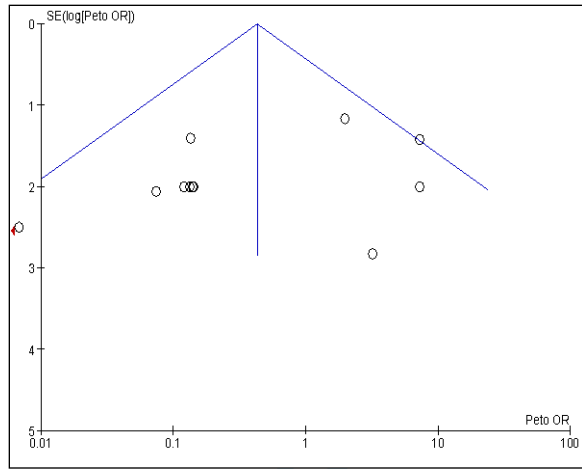

### G) Prostate cancer

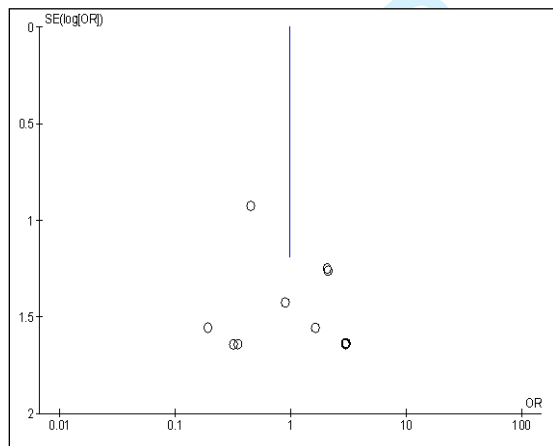

### H) Serious adverse events

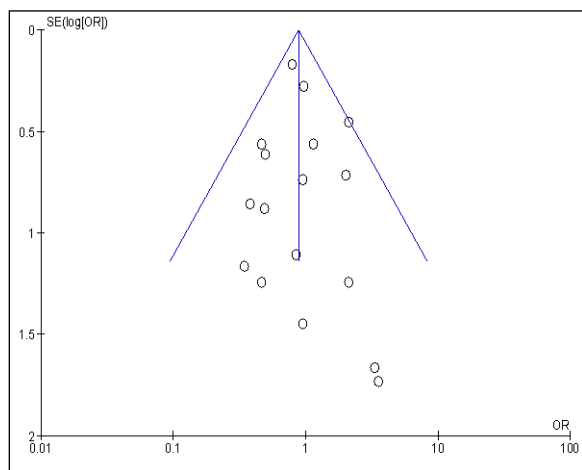

### I) Withdrawals due to adverse events

Supplemental Online Content: Elliott et al. Testosterone therapy in hypogonadal men: a systematic review and network meta-analysis.

For peer review only - <http://bmjopen.bmj.com/site/about/guidelines.xhtml>

1  
2  
3  
4  
5  
6  
7  
8  
9  
10  
11  
12  
13  
14  
15  
16  
17  
18  
19  
20  
21  
22  
23  
24  
25  
26  
27  
28  
29  
30  
31  
32  
33  
34  
35  
36  
37  
38  
39  
40  
41  
42  
43  
44  
45  
46  
47  
48  
49  
50  
51  
52  
53  
54  
55  
56  
57  
58  
59  
60

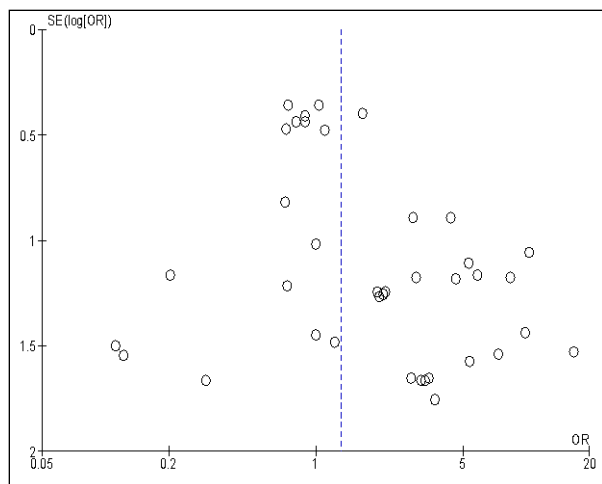

Supplemental Online Content: Elliott et al. Testosterone therapy in hypogonadal men: a systematic review and network meta-analysis.

For peer review only - <http://bmjopen.bmj.com/site/about/guidelines.xhtml>

1  
2  
3  
4  
5  
6  
7  
8  
9  
10  
11  
12  
13  
14  
15  
16  
17  
18  
19  
20  
21  
22  
23  
24  
25  
26  
27  
28  
29  
30  
31  
32  
33  
34  
35  
36  
37  
38  
39  
40  
41  
42  
43  
44  
45  
46  
47  
48  
49  
50  
51  
52  
53  
54  
55  
56  
57  
58  
59  
60

## eAppendix 6: Evaluation of network consistency

We evaluated the consistency of networks with closed loops. To be classified as a “closed loop,” at least 2 nodes had to be connected by more than one trial (e.g., not connected solely by a multi-arm trial).

To evaluate the consistency of networks with closed loops, two analyses were performed. One was conducted using the standard consistency model, which assumes that the data in the network are consistent. A second analysis was performed using an inconsistency model, which assumes that the data in the network are not consistent. The posterior mean deviance of the individual data points derived from the inconsistency model was plotted against the posterior mean deviance derived from the consistency model. If inconsistency is present, data points will lie under the diagonal line, indicating deviation from the consistency model. Data points above the diagonal line indicate deviation from the inconsistency model and are not indicative of inconsistency.

Model fit was also evaluated by considering the residual deviance and deviance information criterion (DIC) of the inconsistency and consistency models, with the model that has the lower residual deviance and DIC representing the better fit for the data. For each network, the consistency model had a lower residual deviance and DIC for each outcome, representing better model fit.

### LIBIDO: BASE CASE (ALL STUDIES)

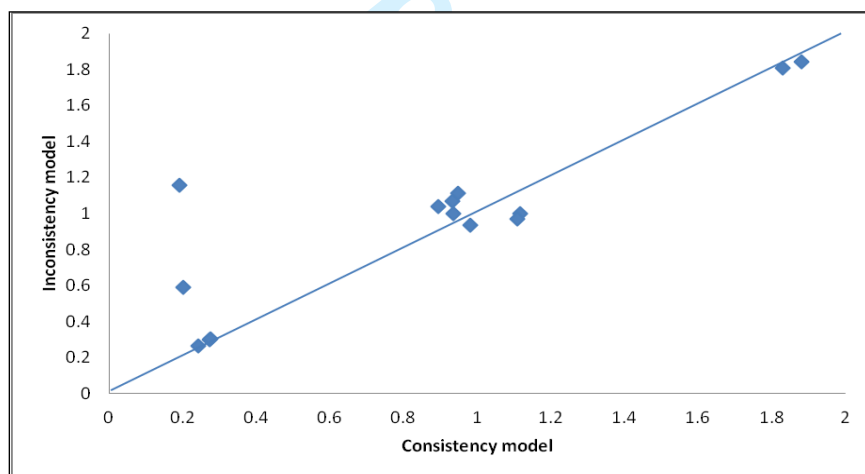

### TOTAL TESTOSTERONE LEVEL, 3 MO

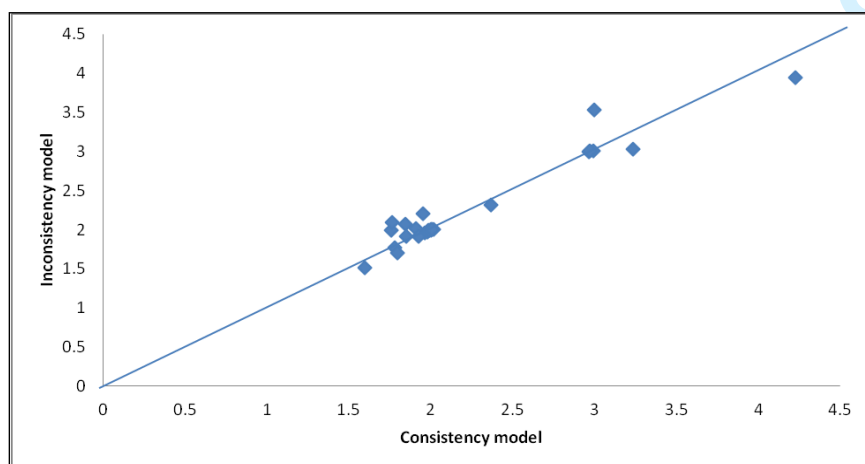

**TOTAL TESTOSTERONE LEVEL, 6 MO**

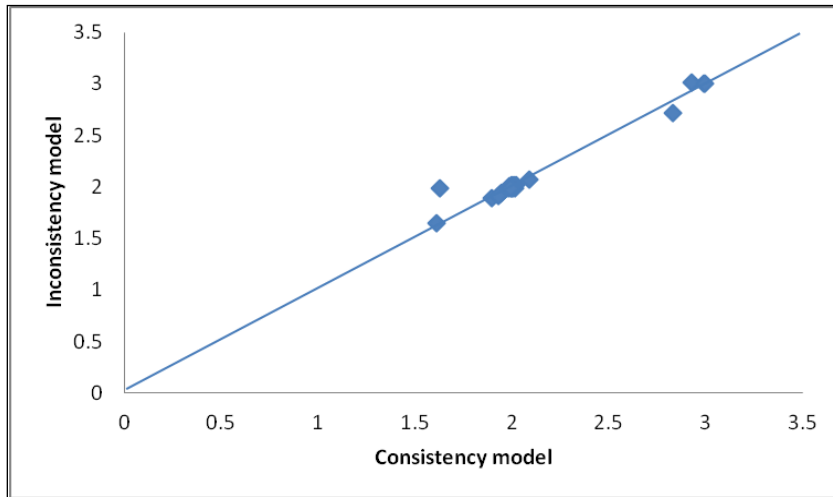

**TOTAL TESTOSTERONE LEVEL, END OF STUDY**

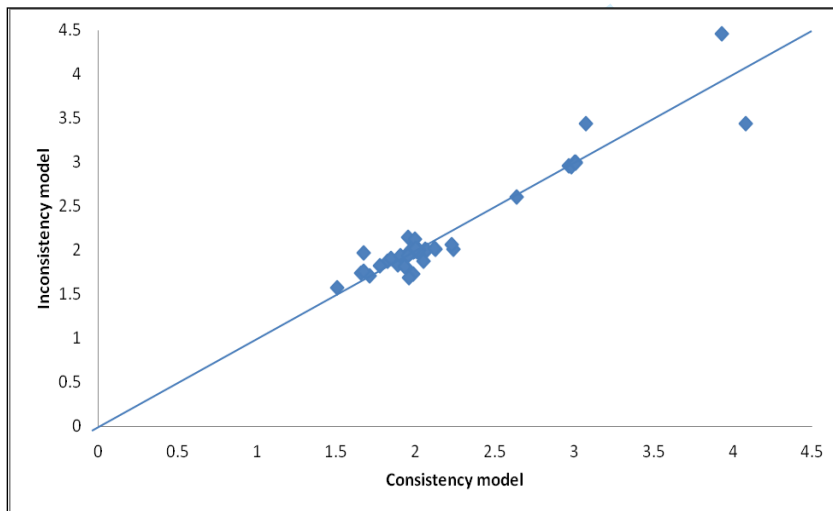

Supplemental Online Content: Elliott et al. Testosterone therapy in hypogonadal men: a systematic review and network meta-analysis.

For peer review only - <http://bmjopen.bmj.com/site/about/guidelines.xhtml>

1  
2  
3  
4  
5  
6  
7  
8  
9  
10  
11  
12  
13  
14  
15  
16  
17  
18  
19  
20  
21  
22  
23  
24  
25  
26  
27  
28  
29  
30  
31  
32  
33  
34  
35  
36  
37  
38  
39  
40  
41  
42  
43  
44  
45  
46  
47  
48  
49  
50  
51  
52  
53  
54  
55  
56  
57  
58  
59  
60

## eAppendix 7: Evidence networks

## Summary of network characteristics

| Outcome                          | No. of trials | No. of treatments* | No. of comparisons† | No. of participants | Treatment duration |
|----------------------------------|---------------|--------------------|---------------------|---------------------|--------------------|
| Quality of life                  | 23            | 14                 | 27                  | 3090                | 12 wk to 3 yr      |
| Depression                       | 12            | 9                  | 12                  | 852                 | 12 wk to 3 yr      |
| Libido                           | 14            | 10                 | 23                  | 3167                | 12 wk to 3 yr      |
| Erectile function                | 17            | 9                  | 19                  | 3165                | 12 wk to 3 yr      |
| Total testosterone, 3 mo         | 26            | 15                 | 39                  | 2739                | NA                 |
| Total testosterone, 6 mo         | 23            | 18                 | 29                  | 2908                | NA                 |
| Total testosterone, end of study | 57            | 28                 | 74                  | 5538                | 12 wk to 3 yr      |
| Serious AEs                      | 15            | 7                  | 15                  | 1860                | 12 to 3 yr         |
| Withdrawals due to AEs           | 27            | 16                 | 29                  | 4165                | 12 wk to 3 yr      |

Note: AE = adverse event.  
 \*In addition to placebo  
 †Direct comparisons based on the number of 2-, 3-, and 4-arm trials.

## eFigure 1A) Depression

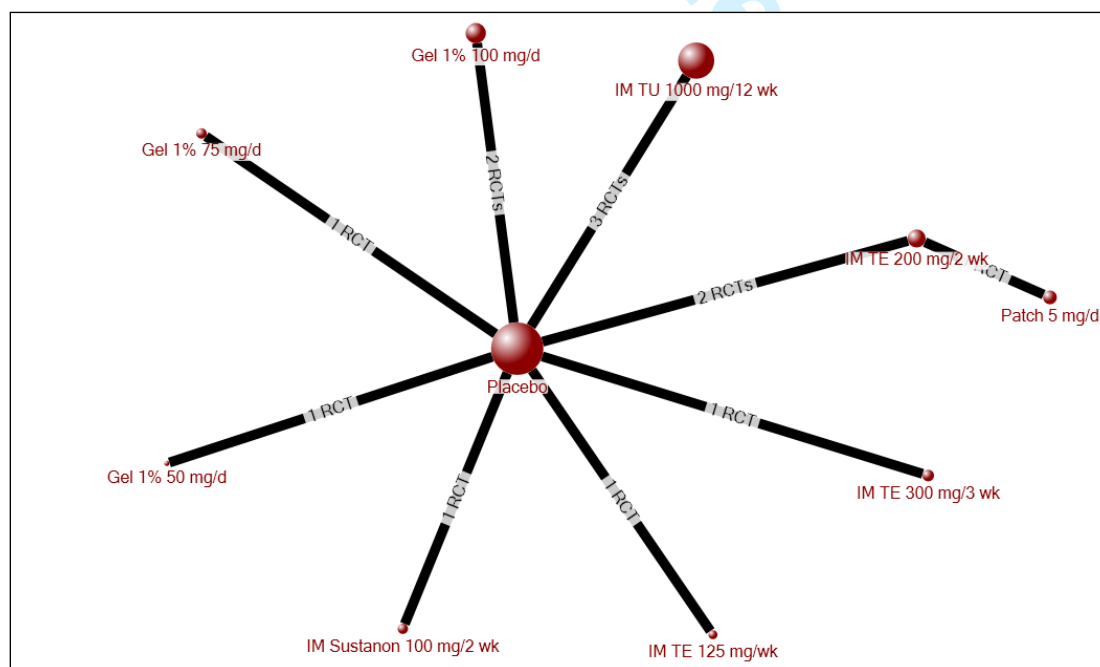

Supplemental Online Content: Elliott et al. Testosterone therapy in hypogonadal men: a systematic review and network meta-analysis.

For peer review only - <http://bmjopen.bmj.com/site/about/guidelines.xhtml>

B) Libido

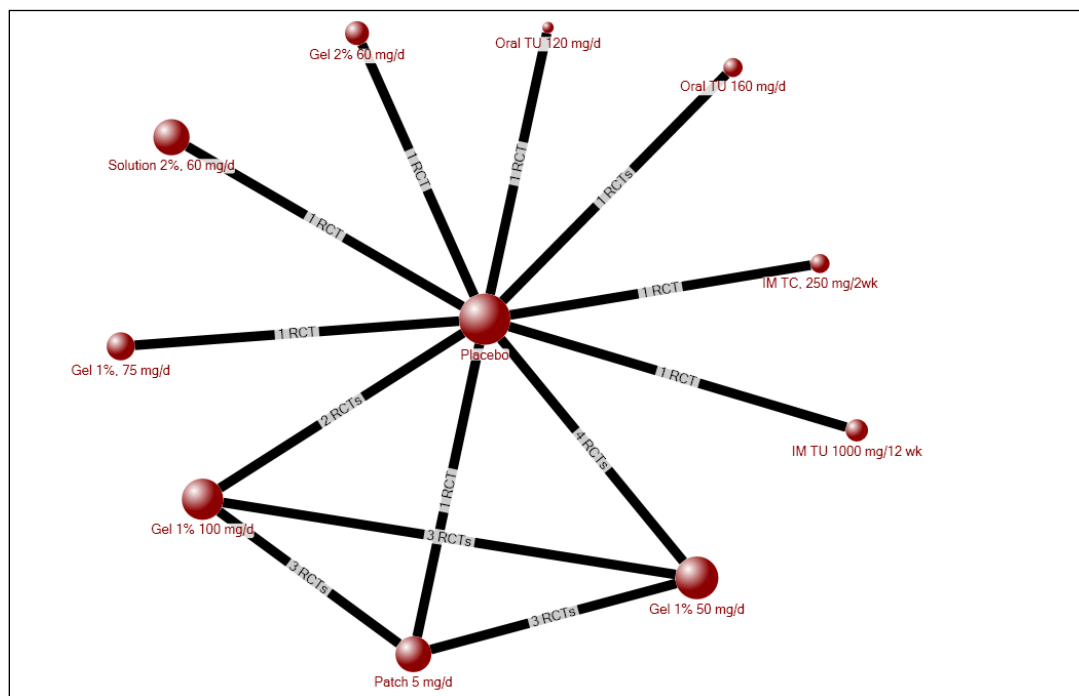

C) Erectile function

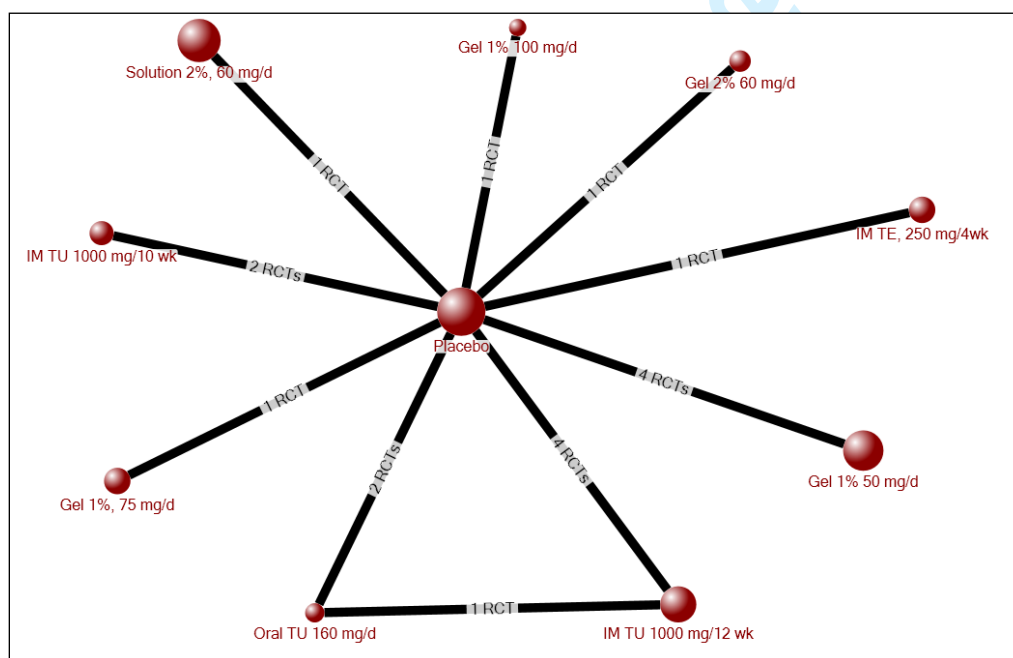

Supplemental Online Content: Elliott et al. Testosterone therapy in hypogonadal men: a systematic review and network meta-analysis.

For peer review only - <http://bmjopen.bmj.com/site/about/guidelines.xhtml>

1  
2  
3  
4  
5  
6  
7  
8  
9  
10  
11  
12  
13  
14  
15  
16  
17  
18  
19  
20  
21  
22  
23  
24  
25  
26  
27  
28  
29  
30  
31  
32  
33  
34  
35  
36  
37  
38  
39  
40  
41  
42  
43  
44  
45  
46  
47  
48  
49  
50  
51  
52  
53  
54  
55  
56  
57  
58  
59  
60

D) Serious adverse events

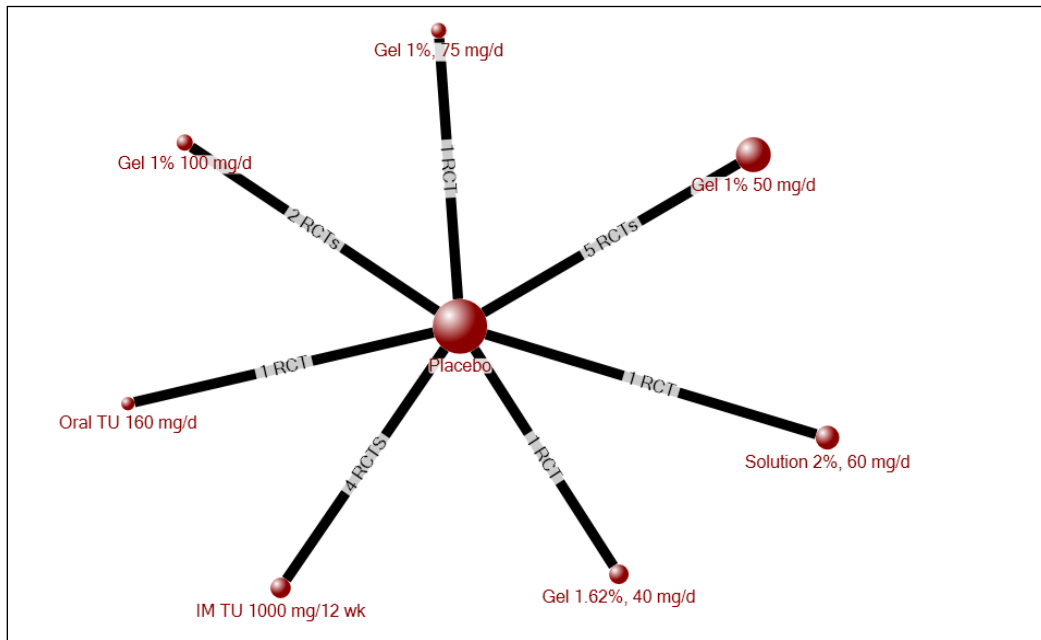

E) Withdrawals due to adverse events

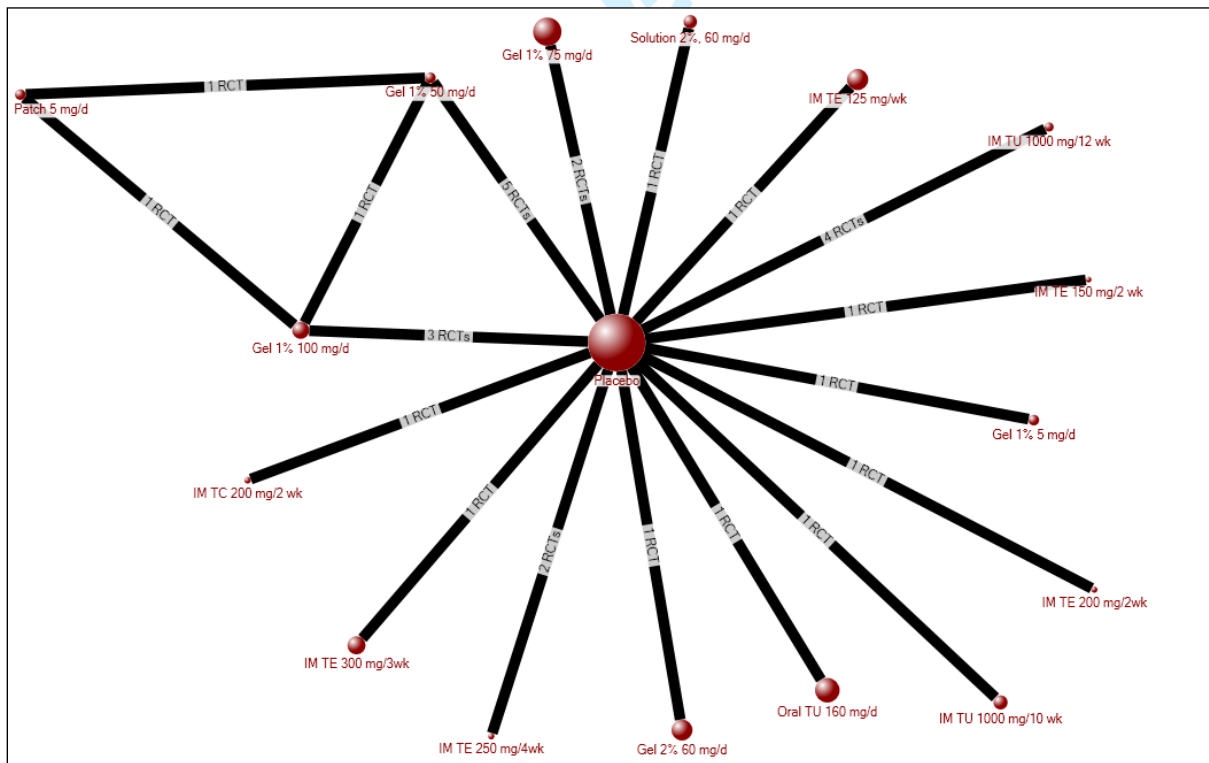

Supplemental Online Content: Elliott et al. Testosterone therapy in hypogonadal men: a systematic review and network meta-analysis.

For peer review only - <http://bmjopen.bmj.com/site/about/guidelines.xhtml>



eAppendix 8: Pair-wise meta-analyses and network meta-analyses

eFigure 2: Individual trial results, quality of life, among men without major comorbidities

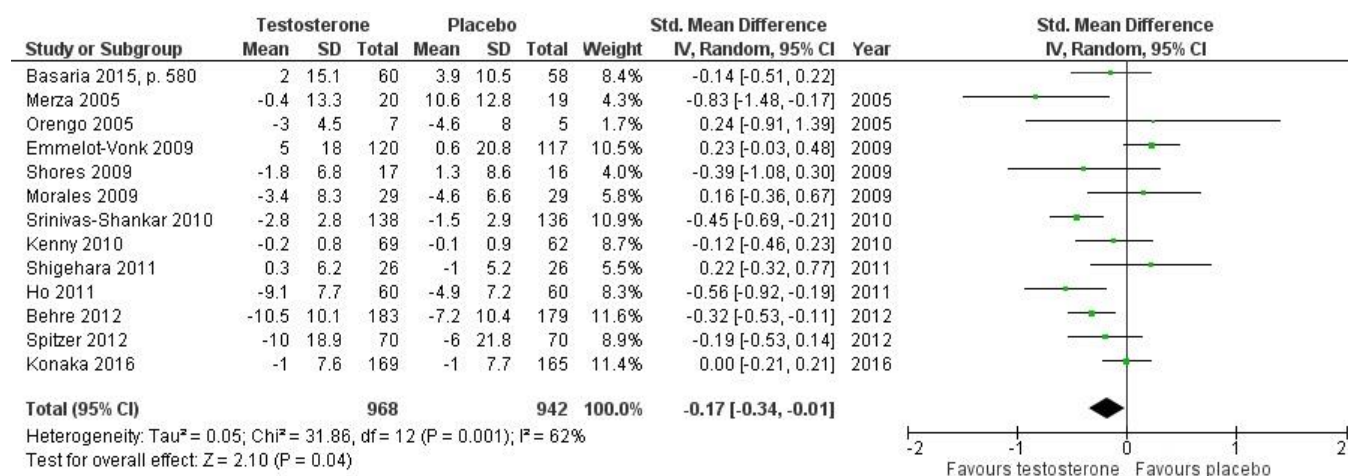

## eFigure 3: Individual trial results, depression

## A) All trials

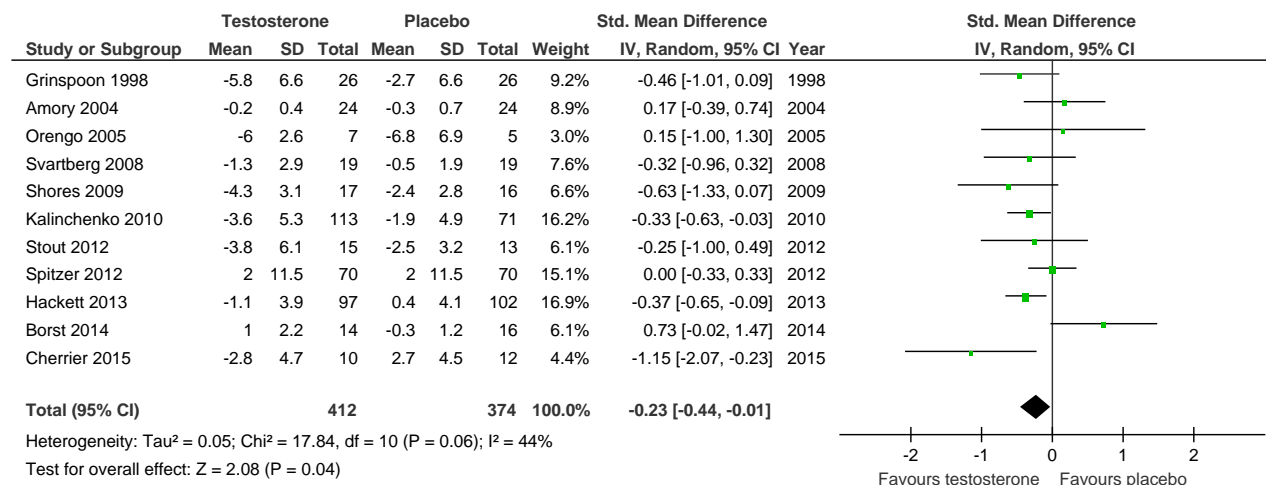

## B) Trials involving men without major comorbidities

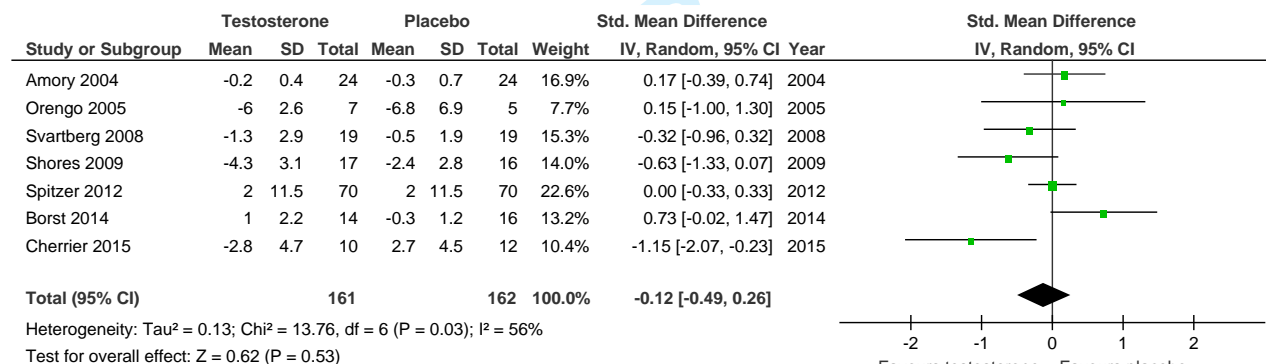

eTable 5: Depression – Bayesian network meta-analysis\*

| Treatment                 | Standardized mean difference (95% confidence interval) |                       |                       |                      |                       |                       |                       |                       |                      |                          |
|---------------------------|--------------------------------------------------------|-----------------------|-----------------------|----------------------|-----------------------|-----------------------|-----------------------|-----------------------|----------------------|--------------------------|
|                           | Placebo                                                | Patch, 5 mg/d         | Gel 1%, 50 mg/d       | Gel 1%, 75 mg/d      | Gel 1%, 100 mg/d      | IM TU, 1000 mg/12 wk  | IM TE, 125 mg/wk      | IM TE, 200 mg/3 wk    | IM TE, 300 mg/3 wk   | IM Sustanon, 100 mg/2 wk |
| Patch, 5 mg/d             | -0.10<br>(-2.43,2.32)                                  | —                     |                       |                      |                       |                       |                       |                       |                      |                          |
| Gel 1%, 50 mg/d           | 0.17<br>(-1.72,2.00)                                   | 0.27<br>(-2.76,3.22)  | —                     |                      |                       |                       |                       |                       |                      |                          |
| Gel 1%, 75 mg/d           | -0.63<br>(-2.35,1.10)                                  | -0.54<br>(-3.46,2.37) | -0.80<br>(-3.33,1.74) | —                    |                       |                       |                       |                       |                      |                          |
| Gel 1%, 100 mg/d          | -0.38<br>(-1.71,0.65)                                  | -0.28<br>(-3.12,2.20) | -0.55<br>(-2.87,1.55) | 0.25<br>(-2.00,2.18) | —                     |                       |                       |                       |                      |                          |
| IM TU, 1000 mg/12 wk      | -0.34<br>(-1.29,0.61)                                  | -0.24<br>(-2.82,2.31) | -0.51<br>(-2.55,1.59) | 0.29<br>(-1.67,2.22) | 0.04<br>(-1.32,1.72)  | —                     |                       |                       |                      |                          |
| IM TE 125 mg/wk           | 0.69<br>(-1.02,2.42)                                   | 0.79<br>(-2.12,3.67)  | 0.52<br>(-1.97,3.10)  | 1.32<br>(-1.12,3.76) | 1.07<br>(-0.87,3.31)  | 1.03<br>(-0.94,3.00)  | —                     |                       |                      |                          |
| IM TE, 200 mg/2 wk        | 0.18<br>(-1.47,1.91)                                   | 0.28<br>(-1.38,1.92)  | 0.01<br>(-2.42,2.56)  | 0.82<br>(-1.58,3.20) | 0.56<br>(-1.32,2.81)  | 0.53<br>(-1.38,2.51)  | -0.51<br>(-2.88,1.91) | —                     |                      |                          |
| IM TE, 300 mg/3 wk        | -0.46<br>(-2.13,1.22)                                  | -0.36<br>(-3.26,2.50) | -0.63<br>(-3.10,1.89) | 0.17<br>(-2.22,2.53) | -0.08<br>(-1.95,2.12) | -0.12<br>(-2.05,1.81) | -1.15<br>(-3.54,1.29) | -0.64<br>(-3.02,1.67) | —                    |                          |
| IM Sustanon, 100 mg/2 wk† | -0.25<br>(-1.98,1.43)                                  | -0.15<br>(-3.09,2.72) | -0.42<br>(-2.93,2.11) | 0.38<br>(-2.11,2.79) | 0.13<br>(-1.84,2.33)  | 0.09<br>(-1.92,2.06)  | -0.94<br>(-3.39,1.45) | -0.44<br>(-2.87,1.92) | 0.21<br>(-2.23,2.58) | —                        |

Note: IM = intramuscular, TE = testosterone enanthate, TU = testosterone undecanoate.  
 \*Random effects model. Analysis based on change from baseline. A negative SMD indicates improvement in depression. Significant changes are indicated by use of bold and colour (green indicates that the row treatment is significantly better than the column treatment, while red indicates that the row treatment is significantly worse than the column treatment). White indicates no significant difference between treatments.  
 †Blend of testosterone propionate, testosterone phenylpropionate, testosterone isocaproate, and testosterone decanoate.

Supplemental Online Content: Elliott et al. Testosterone therapy in hypogonadal men: a systematic review and network meta-analysis.

For peer review only - <http://bmjopen.bmj.com/site/about/guidelines.xhtml>

eFigure 4: Individual trial results, libido

A) All trials

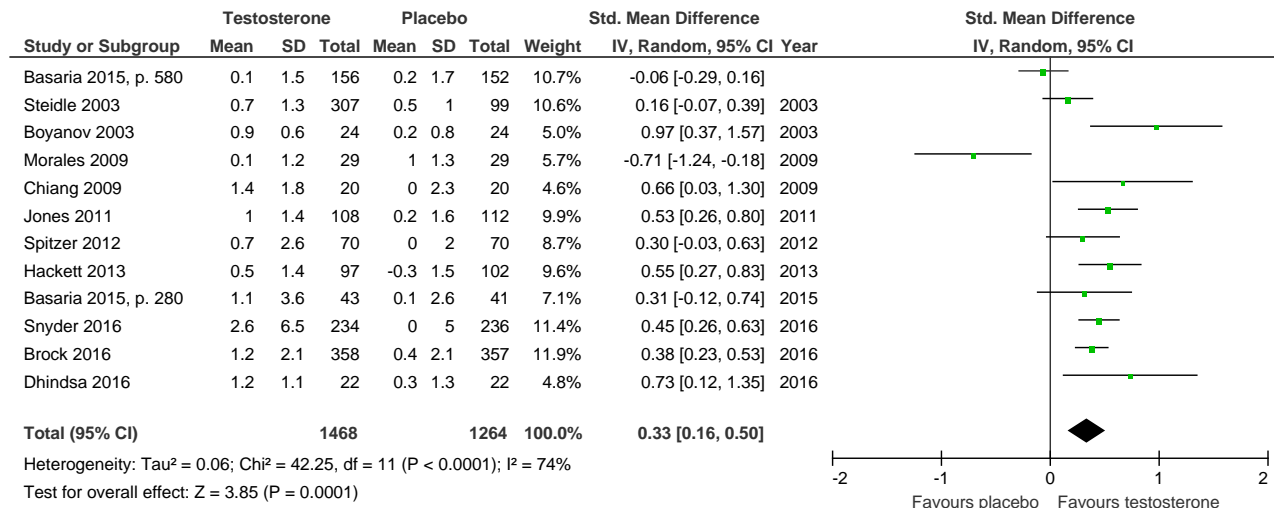

B) Trials involving men with no major comorbidities

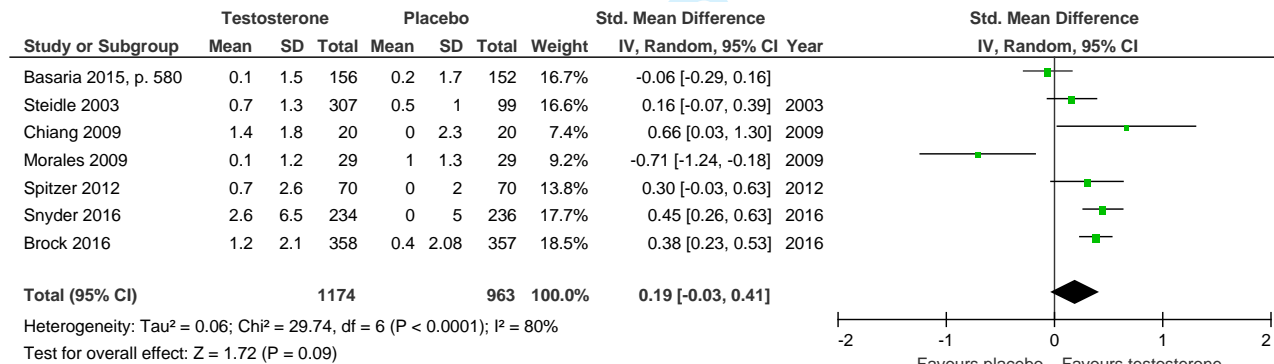

eTable6: Libido – Bayesian network meta-analysis\*

|                         | Standardized mean difference (95% confidence interval) |                                      |                                      |                                   |                                     |                                      |                                      |                                      |                                   |                             |                      |
|-------------------------|--------------------------------------------------------|--------------------------------------|--------------------------------------|-----------------------------------|-------------------------------------|--------------------------------------|--------------------------------------|--------------------------------------|-----------------------------------|-----------------------------|----------------------|
|                         | Placebo                                                | Patch,<br>5 mg/d                     | Gel 1%,<br>50 mg/d                   | Gel 1%,<br>75 mg/d                | Gel 1%,<br>100 mg/d                 | Gel 2%,<br>60 mg/d                   | Solution<br>2%,<br>60 mg/d           | Oral TU,<br>120 mg/d                 | Oral, TU<br>160 mg/d              | IM TU,<br>1000 mg/<br>12 wk | IM TC, 250<br>mg/2wk |
| Patch,<br>5 mg/d        | 0.17<br>(-0.13,0.46)                                   | —                                    |                                      |                                   |                                     |                                      |                                      |                                      |                                   |                             |                      |
| Gel 1%,<br>50 mg/d      | <b>0.32</b><br><b>(0.10,0.55)</b>                      | 0.15<br>(-0.10,0.42)                 | —                                    |                                   |                                     |                                      |                                      |                                      |                                   |                             |                      |
| Gel 1%,<br>75 mg/d      | -0.06<br>(-0.49,0.36)                                  | -0.23<br>(-0.75,0.29)                | -0.38<br>(-0.87,0.10)                | —                                 |                                     |                                      |                                      |                                      |                                   |                             |                      |
| Gel 1%,<br>100 mg/d     | <b>0.43</b><br><b>(0.16,0.69)</b>                      | <b>0.26</b><br><b>(0.00,0.52)</b>    | 0.11<br>(-0.14,0.35)                 | 0.49<br>(-0.01,0.99)              | —                                   |                                      |                                      |                                      |                                   |                             |                      |
| Gel 2%,<br>60 mg/d      | <b>0.54</b><br><b>(0.09,0.99)</b>                      | 0.37<br>(-0.17,0.91)                 | 0.21<br>(-0.29,0.72)                 | 0.60<br>(-0.01,1.22)              | 0.11<br>(-0.41,0.63)                | —                                    |                                      |                                      |                                   |                             |                      |
| Solution 2%,<br>60 mg/d | 0.39<br>(-0.01,0.79)                                   | 0.22<br>(-0.28,0.72)                 | 0.07<br>(-0.39,0.53)                 | 0.45<br>(-0.12,1.04)              | -0.04<br>(-0.52,0.44)               | -0.15<br>(-0.75,0.46)                | —                                    |                                      |                                   |                             |                      |
| Oral TU,<br>120 mg/d    | <b>1.00</b><br><b>(0.31,1.68)</b>                      | <b>0.83</b><br><b>(0.08,1.58)</b>    | 0.68<br>(-0.05,1.39)                 | <b>1.06</b><br><b>(0.25,1.87)</b> | 0.57<br>(-0.17,1.30)                | 0.46<br>(-0.36,1.28)                 | 0.61<br>(-0.18,1.39)                 | —                                    |                                   |                             |                      |
| Oral TU,<br>160 mg/d    | <b>-0.72</b><br><b>(-1.35,-0.10)</b>                   | <b>-0.89</b><br><b>(-1.58,-0.19)</b> | <b>-1.04</b><br><b>(-1.70,-0.38)</b> | -0.66<br>(-1.41,0.10)             | <b>-1.15</b><br><b>(-1.83,0.47)</b> | <b>-1.26</b><br><b>(-2.01,-0.49)</b> | <b>-1.11</b><br><b>(-1.84,-0.37)</b> | <b>-1.72</b><br><b>(-2.66,-0.78)</b> | —                                 |                             |                      |
| IM TU, 1000<br>mg/12 wk | <b>0.57</b><br><b>(0.11,1.03)</b>                      | 0.40<br>(-0.14,0.95)                 | 0.25<br>(-0.26,0.76)                 | <b>0.63</b><br><b>(0.00,1.26)</b> | 0.14<br>(-0.38,0.67)                | 0.03<br>(-0.61,0.68)                 | 0.18<br>(-0.42,0.79)                 | -0.43<br>(-1.25,0.41)                | <b>1.29</b><br><b>(0.52,2.07)</b> | —                           |                      |

Supplemental Online Content: Elliott et al. Testosterone therapy in hypogonadal men: a systematic review and network meta-analysis.

For peer review only - <http://bmjopen.bmj.com/site/about/guidelines.xhtml>

1  
2  
3  
4  
5  
6  
7  
8  
9  
10  
11  
12  
13  
14  
15  
16  
17  
18  
19  
20  
21  
22  
23  
24  
25  
26  
27  
28  
29  
30  
31  
32  
33  
34  
35  
36  
37  
38  
39  
40  
41  
42  
43  
44  
45  
46  
47  
48  
49

|                   |                                   |                          |                      |                          |                          |                      |                          |                           |                                   |                          |   |
|-------------------|-----------------------------------|--------------------------|----------------------|--------------------------|--------------------------|----------------------|--------------------------|---------------------------|-----------------------------------|--------------------------|---|
| IM TC, 250 mg/2wk | <b>0.71</b><br><b>(0.01,1.41)</b> | 0.55<br>(-<br>0.21,1.30) | 0.39<br>(-0.34,1.12) | 0.78<br>(-<br>0.05,1.59) | 0.29<br>(-<br>0.46,1.04) | 0.18<br>(-0.65,0.99) | 0.33<br>(-<br>0.47,1.13) | -0.28<br>(-<br>1.25,0.72) | <b>1.44</b><br><b>(0.49,2.37)</b> | 0.14<br>(-<br>0.70,0.97) | — |
|-------------------|-----------------------------------|--------------------------|----------------------|--------------------------|--------------------------|----------------------|--------------------------|---------------------------|-----------------------------------|--------------------------|---|

Note: IM = intramuscular injection, TC = testosterone cypionate, TU = testosterone undecanoate.  
 \*Random effects model. Analysis based on change from baseline. A positive SMD indicates improvement in libido. Significant changes are indicated by use of bold and colour (green indicates that the row treatment is significantly better than the column treatment, while red indicates that the row treatment is significantly worse than the column treatment). White indicates no significant difference between treatments.

For peer review only

Supplemental Online Content: Elliott et al. Testosterone therapy in hypogonadal men: a systematic review and network meta-analysis.

For peer review only - <http://bmjopen.bmj.com/site/about/guidelines.xhtml>

eFigure 5: Individual trial results, erectile function

A) All trials

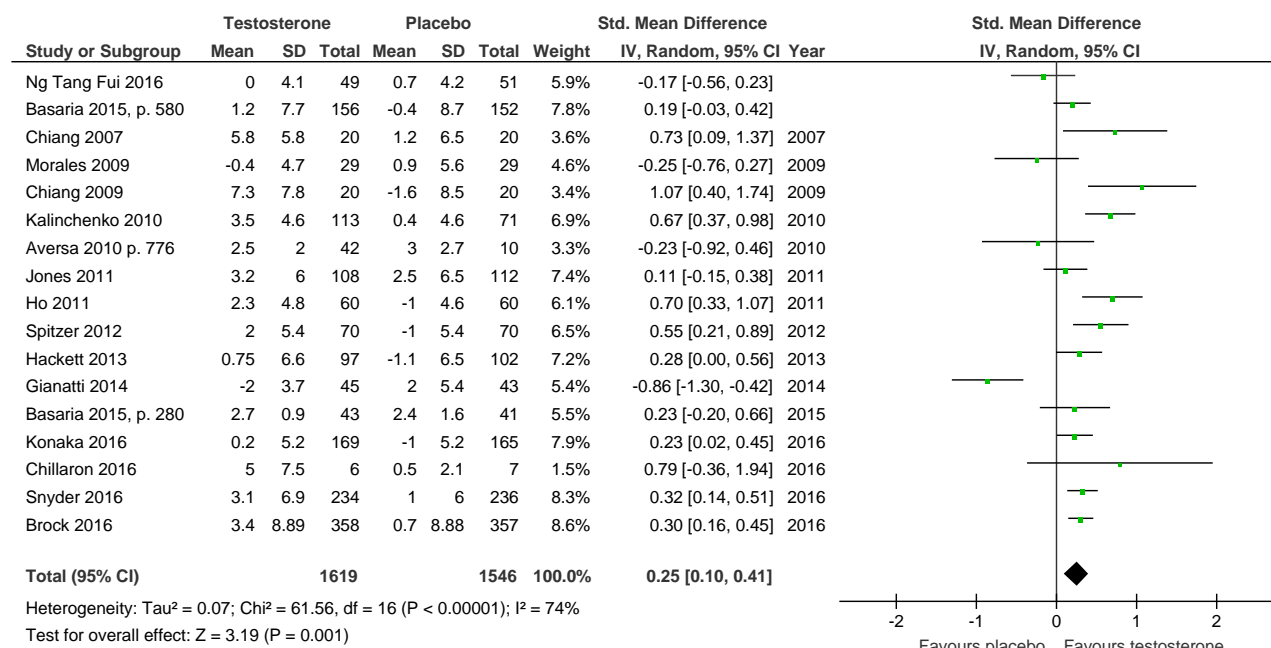

B) Trials involving men without major comorbidities

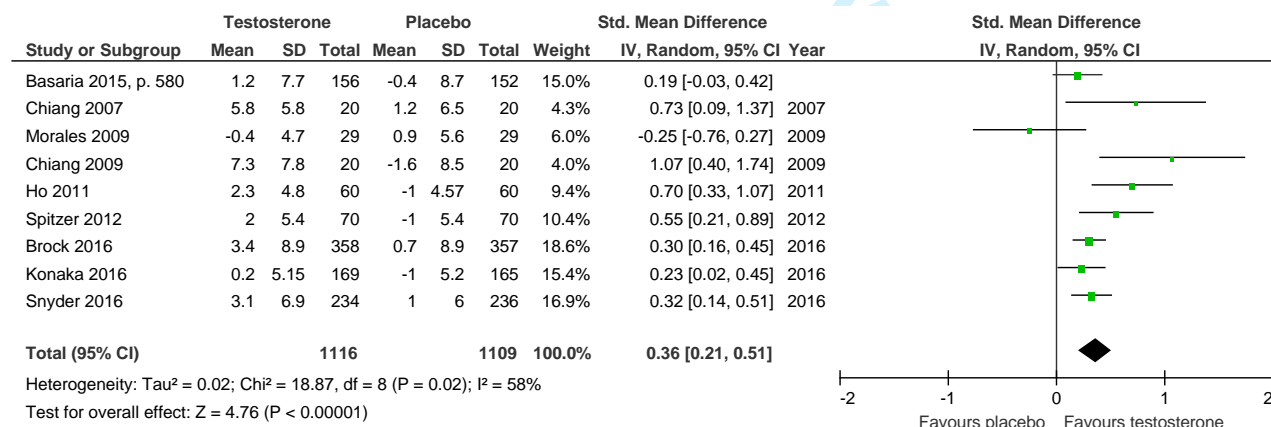

eTable7: Erectile function at end of treatment – Bayesian network meta-analysis\*

|                                  | Standardized mean difference (95% confidence interval) |                       |                       |                       |                       |                         |                      |                            |                            |                     |
|----------------------------------|--------------------------------------------------------|-----------------------|-----------------------|-----------------------|-----------------------|-------------------------|----------------------|----------------------------|----------------------------|---------------------|
|                                  | Placebo                                                | Gel 1%,<br>50 mg/d    | Gel 1%,<br>75 mg/d    | Gel 1%,<br>100 mg/d   | Gel 2%,<br>60 mg/d    | Solution 2%,<br>60 mg/d | Oral, TU<br>160 mg/d | IM TU,<br>1000 mg/10<br>wk | IM TU,<br>1000 mg/12<br>wk | IM TE 250<br>mg/4wk |
| <b>Gel 1%,<br/>50 mg/d</b>       | 0.65<br>(-0.11,1.42)                                   | —                     |                       |                       |                       |                         |                      |                            |                            |                     |
| <b>Gel 1%,<br/>75 mg/d</b>       | 0.26<br>(-0.60,1.11)                                   | -0.39<br>(-1.55,0.76) | —                     |                       |                       |                         |                      |                            |                            |                     |
| <b>Gel 1%, 100<br/>mg/d</b>      | 0.55<br>(-0.70,1.80)                                   | -0.10<br>(-1.57,1.35) | 0.29<br>(-1.23,1.82)  | —                     |                       |                         |                      |                            |                            |                     |
| <b>Gel 2%, 60<br/>mg/d</b>       | 0.11<br>(-1.11,1.33)                                   | -0.54<br>(-1.99,0.90) | -0.15<br>(-1.66,1.34) | -0.44<br>(-2.18,1.31) | —                     |                         |                      |                            |                            |                     |
| <b>Solution 2%,<br/>60 mg/d</b>  | 0.30<br>(-0.90,1.51)                                   | -0.35<br>(-1.79,1.07) | 0.04<br>(-1.43,1.53)  | -0.25<br>(-1.99,1.50) | 0.19<br>(-1.54,1.92)  | —                       |                      |                            |                            |                     |
| <b>Oral TU, 160<br/>mg/d</b>     | -0.47<br>(-1.41,0.43)                                  | -1.12<br>(-2.34,0.05) | -0.73<br>(-2.02,0.51) | -1.03<br>(-2.60,0.52) | -0.59<br>(-2.14,0.95) | -0.78<br>(-2.31,0.73)   | —                    |                            |                            |                     |
| <b>IM TU, 1000<br/>mg/10 wk</b>  | 0.17<br>(-0.77,1.19)                                   | -0.48<br>(-1.69,0.78) | -0.09<br>(-1.35,1.24) | -0.38<br>(-1.92,1.25) | 0.06<br>(-1.47,1.66)  | -0.13<br>(-1.63,1.46)   | 0.65<br>(-0.65,2.04) | —                          |                            |                     |
| <b>IM TU, 1000<br/>mg/ 12 wk</b> | 0.21<br>(-0.36,0.76)                                   | -0.44<br>(-1.40,0.49) | -0.05<br>(-1.10,0.96) | -0.34<br>(-1.72,1.02) | 0.10<br>(-1.24,1.44)  | -0.09<br>(-1.44,1.23)   | 0.68<br>(-0.29,1.68) | 0.03<br>(-1.13,1.12)       | —                          |                     |
| <b>IM TE 250<br/>mg/4wk</b>      | 0.22<br>(-1.00,1.45)                                   | -0.43<br>(-1.88,1.01) | -0.04<br>(-1.54,1.46) | -0.33<br>(-2.08,1.41) | 0.11<br>(-1.63,1.84)  | -0.08<br>(-1.80,1.62)   | 0.69<br>(-0.83,2.22) | 0.04<br>(-1.57,1.57)       | 0.01<br>(-1.33,1.36)       | —                   |

Note: IM = intramuscular injection, TE = testosterone enanthate, TU = testosterone undecanoate.

\*Random effects model. Analysis based on change from baseline. A positive SMD indicates improvement in erectile function. Significant changes are indicated by use of bold and colour (green indicates that the row treatment is significantly better than the column treatment, while red indicates that the row treatment is significantly worse than the column treatment). White indicates no significant difference between treatments.

Supplemental Online Content: Elliott et al. Testosterone therapy in hypogonadal men: a systematic review and network meta-analysis.

For peer review only - <http://bmjopen.bmj.com/site/about/guidelines.xhtml>



**eTable 8: Total testosterone level after 3 months of treatment – Bayesian network meta-analysis\***

\*Random effects model. Analysis is based on mean total testosterone level after treatment. A positive mean difference indicates a statistically significant improvement in total testosterone level. Significant changes are indicated by use of bold and colour (green indicates that the treatment is significantly better than the reference, while red indicates that the treatment is significantly worse than the reference). White indicates no significant difference between treatment and reference.

| Treatment                    | Reference      | Mean difference<br>(95% credible intervals) |
|------------------------------|----------------|---------------------------------------------|
| Patch 4.8 mg/d               | Placebo        | 12.46(-3.49,28.17)                          |
| Patch 5 mg/d                 |                | <b>5.06(0.88,9.25)</b>                      |
| Gel 1% 50 mg/d               |                | <b>6.54(3.51,9.65)</b>                      |
| Gel 1% 75 mg/d               |                | 7.48(-2.02,17.01)                           |
| Gel 1% 100 mg/d              |                | <b>9.82(6.19,13.44)</b>                     |
| Oral TU 120 mg/d             |                | 4.31(-4.08,12.69)                           |
| Oral TU 160 mg/d             |                | 3.64(-4.69,11.86)                           |
| Testosterone pellets 1200 mg |                | 6.40(-5.08,17.89)                           |
| IM TU 1000 mg/12 wk          |                | <b>8.91(2.80,15.08)</b>                     |
| IM TE 100 mg/wk              |                | <b>12.12(3.48,20.83)</b>                    |
| IM TE 200 mg/2wk             |                | 6.26(-2.80,15.34)                           |
| IM TE 250 mg/3wk             |                | <b>12.78(1.28,24.21)</b>                    |
| IM TC 200 mg/2 wk            |                | 3.25(-6.32,12.89)                           |
| IM TC 200 mg/4 wk            |                | 1.73(-8.61,12.15)                           |
| Durateston, IM, 250 mg/4wk   |                | 2.13(-8.21,12.60)                           |
| Patch 5 mg/d                 | Patch 4.8 mg/d | -7.40(-23.71,9.17)                          |
| Gel 1% 50 mg/d               |                | -5.91(-21.92,10.35)                         |
| Gel 1% 75 mg/d               |                | -4.98(-23.37,13.63)                         |
| Gel 1% 100 mg/d              |                | -2.64(-18.80,13.74)                         |
| Oral TU 120 mg/d             |                | -8.15(-26.04,9.82)                          |
| Oral TU 160 mg/d             |                | -8.82(-22.30,4.67)                          |
| Testosterone pellets 1200 mg |                | -6.06(-18.69,6.69)                          |
| IM TU 1000 mg/12 wk          |                | -3.55(-20.42,13.57)                         |
| IM TE 100 mg/wk              |                | -0.34(-18.30,17.61)                         |
| IM TE 200 mg/2wk             |                | -6.20(-24.42,12.21)                         |
| IM TE 250 mg/3wk             |                | 0.32(-10.51,11.25)                          |
| IM TC 200 mg/2 wk            |                | -9.21(-27.76,9.46)                          |
| IM TC 200 mg/4 wk            |                | -10.72(-29.59,8.36)                         |
| Durateston, IM, 250 mg/4wk   |                | -10.33(-29.25,8.69)                         |
| Gel 1% 50 mg/d               | Patch 5 mg/d   | 1.48(-2.69,5.71)                            |
| Gel 1% 75 mg/d               |                | 2.41(-7.90,12.76)                           |
| Gel 1% 100 mg/d              |                | <b>4.76(0.40,9.04)</b>                      |
| Oral TU 120 mg/d             |                | -0.75(-10.16,8.55)                          |

|    |                              |                 |                     |
|----|------------------------------|-----------------|---------------------|
| 1  |                              |                 |                     |
| 2  |                              |                 |                     |
| 3  | Oral TU 160 mg/d             |                 | -1.43(-10.82,7.80)  |
| 4  | Testosterone pellets 1200 mg |                 | 1.34(-10.92,13.53)  |
| 5  | IM TU 1000 mg/12 wk          |                 | 3.85(-3.58,11.27)   |
| 6  | IM TE 100 mg/wk              |                 | 7.06(-2.53,16.60)   |
| 7  | IM TE 200 mg/2wk             |                 | 1.19(-8.83,11.18)   |
| 8  | IM TE 250 mg/3wk             |                 | 7.72(-4.58,19.84)   |
| 9  | IM TC 200 mg/2 wk            |                 | -1.81(-12.35,8.73)  |
| 10 | IM TC 200 mg/4 wk            |                 | -3.33(-14.50,7.86)  |
| 11 | Durateston, IM, 250 mg/4wk   |                 | -2.94(-14.12,8.32)  |
| 12 | Gel 1% 75 mg/d               | Gel 1% 50 mg/d  | 0.93(-8.98,10.93)   |
| 13 | Gel 1% 100 mg/d              |                 | 3.27(-0.68,7.16)    |
| 14 | Oral TU 120 mg/d             |                 | -2.23(-11.30,6.62)  |
| 15 | Oral TU 160 mg/d             |                 | -2.91(-11.82,5.84)  |
| 16 | Testosterone pellets 1200 mg |                 | -0.14(-12.11,11.71) |
| 17 | IM TU 1000 mg/12 wk          |                 | 2.37(-4.49,9.22)    |
| 18 | IM TE 100 mg/wk              |                 | 5.57(-3.60,14.72)   |
| 19 | IM TE 200 mg/2wk             |                 | -0.29(-9.83,9.28)   |
| 20 | IM TE 250 mg/3wk             |                 | 6.24(-5.72,18.05)   |
| 21 | IM TC 200 mg/2 wk            |                 | -3.30(-13.42,6.78)  |
| 22 | IM TC 200 mg/4 wk            |                 | -4.81(-15.66,5.96)  |
| 23 | Durateston, IM, 250 mg/4wk   |                 | -4.42(-15.28,6.46)  |
| 24 | Gel 1% 100 mg/d              | Gel 1% 75 mg/d  | 2.34(-7.87,12.46)   |
| 25 | Oral TU 120 mg/d             |                 | -3.17(-15.86,9.38)  |
| 26 | Oral TU 160 mg/d             |                 | -3.84(-16.49,8.72)  |
| 27 | Testosterone pellets 1200 mg |                 | -1.07(-15.98,13.79) |
| 28 | IM TU 1000 mg/12 wk          |                 | 1.44(-9.92,12.73)   |
| 29 | IM TE 100 mg/wk              |                 | 4.64(-8.23,17.49)   |
| 30 | IM TE 200 mg/2wk             |                 | -1.22(-14.30,11.90) |
| 31 | IM TE 250 mg/3wk             |                 | 5.31(-9.66,20.08)   |
| 32 | IM TC 200 mg/2 wk            |                 | -4.23(-17.84,9.24)  |
| 33 | IM TC 200 mg/4 wk            |                 | -5.74(-19.84,8.38)  |
| 34 | Durateston, IM, 250 mg/4wk   |                 | -5.35(-19.41,8.93)  |
| 35 | Oral TU 120 mg/d             | Gel 1% 100 mg/d | -5.51(-14.69,3.57)  |
| 36 | Oral TU 160 mg/d             |                 | -6.18(-15.23,2.79)  |
| 37 | Testosterone pellets 1200 mg |                 | -3.41(-15.41,8.57)  |
| 38 | IM TU 1000 mg/12 wk          |                 | -0.91(-8.03,6.24)   |
| 39 | IM TE 100 mg/wk              |                 | 2.30(-7.08,11.64)   |
| 40 | IM TE 200 mg/2wk             |                 | -3.56(-13.34,6.30)  |
| 41 | IM TE 250 mg/3wk             |                 | 2.96(-9.16,14.85)   |
| 42 | IM TC 200 mg/2 wk            |                 | -6.57(-16.82,3.69)  |
| 43 | IM TC 200 mg/4 wk            |                 | -8.08(-19.02,2.89)  |
| 44 | Durateston, IM, 250 mg/4wk   |                 | -7.69(-18.61,3.38)  |
| 45 |                              |                 |                     |
| 46 |                              |                 |                     |
| 47 |                              |                 |                     |
| 48 |                              |                 |                     |
| 49 |                              |                 |                     |
| 50 |                              |                 |                     |
| 51 |                              |                 |                     |
| 52 |                              |                 |                     |
| 53 |                              |                 |                     |
| 54 |                              |                 |                     |
| 55 |                              |                 |                     |
| 56 |                              |                 |                     |
| 57 |                              |                 |                     |
| 58 |                              |                 |                     |
| 59 |                              |                 |                     |
| 60 |                              |                 |                     |

|    |                              |                              |                         |
|----|------------------------------|------------------------------|-------------------------|
| 1  |                              |                              |                         |
| 2  |                              |                              |                         |
| 3  | Oral TU 160 mg/d             | Oral TU 120 mg/d             | -0.67(-12.46,11.10)     |
| 4  | Testosterone pellets 1200 mg |                              | 2.09(-12.01,16.29)      |
| 5  | IM TU 1000 mg/12 wk          |                              | 4.60(-5.79,14.94)       |
| 6  | IM TE 100 mg/wk              |                              | 7.81(-4.20,19.92)       |
| 7  | IM TE 200 mg/2wk             |                              | 1.95(-10.36,14.39)      |
| 8  | IM TE 250 mg/3wk             |                              | 8.47(-5.65,22.61)       |
| 9  | IM TC 200 mg/2 wk            |                              | -1.06(-13.92,11.70)     |
| 10 | IM TC 200 mg/4 wk            |                              | -2.58(-16.00,10.91)     |
| 11 | Durateston, IM, 250 mg/4wk   |                              | -2.18(-15.61,11.22)     |
| 12 | Testosterone pellets 1200 mg | Oral TU 160 mg/d             | 2.77(-5.26,10.82)       |
| 13 | IM TU 1000 mg/12 wk          |                              | 5.28(-5.00,15.64)       |
| 14 | IM TE 100 mg/wk              |                              | 8.48(-3.53,20.45)       |
| 15 | IM TE 200 mg/2wk             |                              | 2.62(-9.56,14.98)       |
| 16 | IM TE 250 mg/3wk             |                              | <b>9.15(1.17,17.13)</b> |
| 17 | IM TC 200 mg/2 wk            |                              | -0.39(-13.19,12.34)     |
| 18 | IM TC 200 mg/4 wk            |                              | -1.90(-15.18,11.34)     |
| 19 | Durateston, IM, 250 mg/4wk   |                              | -1.51(-14.84,11.86)     |
| 20 | IM TU 1000 mg/12 wk          | Testosterone pellets 1200 mg | 2.51(-10.54,15.55)      |
| 21 | IM TE 100 mg/wk              |                              | 5.71(-8.62,19.97)       |
| 22 | IM TE 200 mg/2wk             |                              | -0.15(-14.76,14.51)     |
| 23 | IM TE 250 mg/3wk             |                              | 6.38(-0.25,13.01)       |
| 24 | IM TC 200 mg/2 wk            |                              | -3.16(-18.21,11.86)     |
| 25 | IM TC 200 mg/4 wk            |                              | -4.67(-20.16,10.75)     |
| 26 | Durateston, IM, 250 mg/4wk   |                              | -4.28(-19.96,11.21)     |
| 27 | IM TE 100 mg/wk              | IM TU 1000 mg/12 wk          | 3.21(-7.33,13.81)       |
| 28 | IM TE 200 mg/2wk             |                              | -2.66(-13.63,8.30)      |
| 29 | IM TE 250 mg/3wk             |                              | 3.87(-9.22,16.79)       |
| 30 | IM TC 200 mg/2 wk            |                              | -5.66(-17.05,5.71)      |
| 31 | IM TC 200 mg/4 wk            |                              | -7.18(-15.50,1.16)      |
| 32 | Durateston, IM, 250 mg/4wk   |                              | -6.79(-15.25,1.65)      |
| 33 | IM TE 200 mg/2wk             | IM TE 100 mg/wk              | -5.86(-18.36,6.71)      |
| 34 | IM TE 250 mg/3wk             |                              | 0.66(-13.63,15.00)      |
| 35 | IM TC 200 mg/2 wk            |                              | -8.87(-21.88,4.14)      |
| 36 | IM TC 200 mg/4 wk            |                              | -10.38(-23.84,3.13)     |
| 37 | Durateston, IM, 250 mg/4wk   |                              | -9.99(-23.47,3.48)      |
| 38 | IM TE 250 mg/3wk             | IM TE 200 mg/2wk             | 6.53(-8.23,21.04)       |
| 39 | IM TC 200 mg/2 wk            |                              | -3.01(-16.17,10.25)     |
| 40 | IM TC 200 mg/4 wk            |                              | -4.52(-18.16,9.20)      |
| 41 | Durateston, IM, 250 mg/4wk   |                              | -4.13(-17.94,9.72)      |
| 42 | IM TC 200 mg/2 wk            | IM TE 250 mg/3wk             | -9.53(-24.53,5.59)      |
| 43 | IM TC 200 mg/4 wk            |                              | -11.05(-26.44,4.43)     |
| 44 | Durateston, IM, 250 mg/4wk   |                              | -10.65(-26.22,4.95)     |
| 45 |                              |                              |                         |
| 46 |                              |                              |                         |
| 47 |                              |                              |                         |
| 48 |                              |                              |                         |
| 49 |                              |                              |                         |
| 50 |                              |                              |                         |
| 51 |                              |                              |                         |
| 52 |                              |                              |                         |
| 53 |                              |                              |                         |
| 54 |                              |                              |                         |
| 55 |                              |                              |                         |
| 56 |                              |                              |                         |
| 57 |                              |                              |                         |
| 58 |                              |                              |                         |
| 59 |                              |                              |                         |
| 60 |                              |                              |                         |

|                            |                   |                     |
|----------------------------|-------------------|---------------------|
| IM TC 200 mg/4 wk          | IM TC 200 mg/2 wk | -1.51(-15.53,12.52) |
| Durateston, IM, 250 mg/4wk |                   | -1.12(-15.17,13.08) |
| Durateston, IM, 250 mg/4wk | IM TC 200 mg/4 wk | 0.39(-8.03,8.79)    |

### eTable 9: Total testosterone level after 6 months of treatment – Bayesian network meta-analysis\*

\*Random effects model. Analysis based mean total testosterone level after treatment. A positive MD indicates a statistically significant improvement in total testosterone level. Significant changes are indicated by use of bold and colour (green indicates that the row treatment is significantly better than the column treatment, while red indicates that the row treatment is significantly worse than the column treatment). White indicates no significant difference between treatments.

| Treatment                    | Reference      | Mean difference (95% credible interval) |
|------------------------------|----------------|-----------------------------------------|
| Patch 4.8 mg/d               | Placebo        | 10.69(-1.17,22.73)                      |
| Patch 5 mg/d                 |                | <b>8.45(0.51,16.35)</b>                 |
| Gel 1% 50 mg/d               |                | <b>7.94(4.36,11.49)</b>                 |
| Gel 1% 75 mg/d               |                | 5.76(-0.75,12.29)                       |
| Gel 1% 100 mg/d              |                | <b>7.47(3.50,11.40)</b>                 |
| Gel 2% 60 mg/d               |                | <b>19.80(13.59,26.00)</b>               |
| Gel 2.5%, 125 mg/d           |                | <b>12.13(2.00,22.09)</b>                |
| Gel (scrotal) 2.5%, 25 mg/d  |                | 7.89(-2.18,17.86)                       |
| Oral TU 120-160 mg/d         |                | 5.68(-0.52,11.88)                       |
| Oral TU 160 mg/d             |                | 1.84(-2.44,6.10)                        |
| Testosterone pellets 1200 mg |                | 4.69(-2.86,12.17)                       |
| IM TU 1000 mg/12 wk          |                | <b>8.07(3.71,12.46)</b>                 |
| IM TE 150 mg/2wk             |                | <b>12.72(5.10,20.29)</b>                |
| IM TE 200 mg/2wk             |                | <b>10.10(2.68,17.61)</b>                |
| IM TE 250 mg/3wk             |                | <b>11.02(3.59,18.55)</b>                |
| IM TE 300 mg/3wk             |                | <b>18.25(10.92,25.60)</b>               |
| IM TE 50-400 mg/1-2 wk       |                | <b>14.74(4.55,25.01)</b>                |
| IM TC 200 mg/2 wk            |                | 3.21(-4.73,11.12)                       |
| Patch 5 mg/d                 | Patch 4.8 mg/d | -2.24(-16.71,11.98)                     |
| Gel 1% 50 mg/d               |                | -2.75(-15.42,9.56)                      |
| Gel 1% 75 mg/d               |                | -4.94(-18.49,8.60)                      |
| Gel 1% 100 mg/d              |                | -3.22(-15.94,9.31)                      |
| Gel 2% 60 mg/d               |                | 9.11(-4.41,22.45)                       |
| Gel 2.5%, 125 mg/d           |                | 1.44(-14.32,16.85)                      |
| Gel (scrotal) 2.5%, 25 mg/d  |                | -2.80(-18.53,12.61)                     |
| Oral TU 120-160 mg/d         |                | -5.01(-18.65,8.35)                      |
| Oral TU 160 mg/d             |                | -8.85(-20.06,2.21)                      |
| Testosterone pellets 1200 mg |                | -6.01(-16.78,4.72)                      |

|    |                              |                |                            |
|----|------------------------------|----------------|----------------------------|
| 1  |                              |                |                            |
| 2  |                              |                |                            |
| 3  | IM TU 1000 mg/12 wk          |                | -2.62(-14.99,9.53)         |
| 4  | IM TE 150 mg/2wk             |                | 2.03(-12.24,16.16)         |
| 5  | IM TE 200 mg/2wk             |                | -0.59(-14.66,13.38)        |
| 6  | IM TE 250 mg/3wk             |                | 0.33(-9.00,9.68)           |
| 7  | IM TE 300 mg/3wk             |                | 7.56(-6.50,21.52)          |
| 8  | IM TE 50-400 mg/1-2 wk       |                | 4.05(-11.55,19.64)         |
| 9  | IM TC 200 mg/2 wk            |                | -7.49(-21.86,6.80)         |
| 10 | Gel 1% 50 mg/d               | Patch 5 mg/d   | -0.51(-9.17,8.26)          |
| 11 | Gel 1% 75 mg/d               |                | -2.70(-12.88,7.57)         |
| 12 | Gel 1% 100 mg/d              |                | -0.98(-9.71,7.83)          |
| 13 | Gel 2% 60 mg/d               |                | <b>11.35(1.38,21.45)</b>   |
| 14 | Gel 2.5%, 125 mg/d           |                | 3.68(-2.57,9.89)           |
| 15 | Gel (scrotal) 2.5%, 25 mg/d  |                | -0.56(-6.82,5.64)          |
| 16 | Oral TU 120-160 mg/d         |                | -2.77(-12.83,7.29)         |
| 17 | Oral TU 160 mg/d             |                | -6.61(-15.60,2.37)         |
| 18 | Testosterone pellets 1200 mg |                | -3.76(-14.64,7.17)         |
| 19 | IM TU 1000 mg/12 wk          |                | -0.38(-9.40,8.59)          |
| 20 | IM TE 150 mg/2wk             |                | 4.27(-6.77,15.19)          |
| 21 | IM TE 200 mg/2wk             |                | 1.65(-9.12,12.46)          |
| 22 | IM TE 250 mg/3wk             |                | 2.57(-8.35,13.50)          |
| 23 | IM TE 300 mg/3wk             |                | 9.80(-1.00,20.57)          |
| 24 | IM TE 50-400 mg/1-2 wk       |                | 6.29(-6.46,19.33)          |
| 25 | IM TC 200 mg/2 wk            |                | -5.25(-16.35,5.95)         |
| 26 | Gel 1% 75 mg/d               | Gel 1% 50 mg/d | -2.19(-9.54,5.26)          |
| 27 | Gel 1% 100 mg/d              |                | -0.47(-5.79,4.89)          |
| 28 | Gel 2% 60 mg/d               |                | <b>11.86(4.68,19.05)</b>   |
| 29 | Gel 2.5%, 125 mg/d           |                | 4.19(-6.52,14.80)          |
| 30 | Gel (scrotal) 2.5%, 25 mg/d  |                | -0.05(-10.72,10.61)        |
| 31 | Oral TU 120-160 mg/d         |                | -2.26(-9.34,4.96)          |
| 32 | Oral TU 160 mg/d             |                | <b>-6.10(-11.64,-0.46)</b> |
| 33 | Testosterone pellets 1200 mg |                | -3.25(-11.55,5.08)         |
| 34 | IM TU 1000 mg/12 wk          |                | 0.13(-5.49,5.79)           |
| 35 | IM TE 150 mg/2wk             |                | 4.78(-3.58,13.19)          |
| 36 | IM TE 200 mg/2wk             |                | 2.16(-5.97,10.48)          |
| 37 | IM TE 250 mg/3wk             |                | 3.08(-5.14,11.45)          |
| 38 | IM TE 300 mg/3wk             |                | <b>10.31(2.17,18.53)</b>   |
| 39 | IM TE 50-400 mg/1-2 wk       |                | 6.80(-4.00,17.62)          |
| 40 | IM TC 200 mg/2 wk            |                | -4.74(-13.42,3.94)         |
| 41 | Gel 1% 100 mg/d              | Gel 1% 75 mg/d | 1.71(-5.94,9.34)           |
| 42 | Gel 2% 60 mg/d               |                | <b>14.04(5.05,22.97)</b>   |
| 43 | Gel 2.5%, 125 mg/d           |                | 6.37(-5.71,18.31)          |
| 44 | Gel (scrotal) 2.5%, 25 mg/d  |                | 2.14(-9.89,14.03)          |
| 45 |                              |                |                            |
| 46 |                              |                |                            |
| 47 |                              |                |                            |
| 48 |                              |                |                            |
| 49 |                              |                |                            |
| 50 |                              |                |                            |
| 51 |                              |                |                            |
| 52 |                              |                |                            |
| 53 |                              |                |                            |
| 54 |                              |                |                            |
| 55 |                              |                |                            |
| 56 |                              |                |                            |
| 57 |                              |                |                            |
| 58 |                              |                |                            |
| 59 |                              |                |                            |
| 60 |                              |                |                            |

|    |                              |                    |                              |
|----|------------------------------|--------------------|------------------------------|
| 1  |                              |                    |                              |
| 2  |                              |                    |                              |
| 3  | Oral TU 120-160 mg/d         |                    | -0.07(-9.16,8.90)            |
| 4  | Oral TU 160 mg/d             |                    | -3.91(-11.78,3.88)           |
| 5  | Testosterone pellets 1200 mg |                    | -1.07(-10.98,8.82)           |
| 6  | IM TU 1000 mg/12 wk          |                    | 2.31(-5.63,10.19)            |
| 7  | IM TE 150 mg/2wk             |                    | 6.96(-3.13,17.01)            |
| 8  | IM TE 200 mg/2wk             |                    | 4.35(-5.60,14.23)            |
| 9  | IM TE 250 mg/3wk             |                    | 5.26(-4.59,15.19)            |
| 10 | IM TE 300 mg/3wk             |                    | <b>12.50(2.64,22.31)</b>     |
| 11 | IM TE 50-400 mg/1-2 wk       |                    | 8.99(-3.00,21.03)            |
| 12 | IM TC 200 mg/2 wk            |                    | -2.55(-12.74,7.68)           |
| 13 | Gel 2% 60 mg/d               | Gel 1% 100 mg/d    | <b>12.33(5.03,19.71)</b>     |
| 14 | Gel 2.5%, 125 mg/d           |                    | 4.66(-6.17,15.34)            |
| 15 | Gel (scrotal) 2.5%, 25 mg/d  |                    | 0.42(-10.35,11.17)           |
| 16 | Oral TU 120-160 mg/d         |                    | -1.79(-9.10,5.58)            |
| 17 | Oral TU 160 mg/d             |                    | -5.63(-11.50,0.28)           |
| 18 | Testosterone pellets 1200 mg |                    | -2.78(-11.34,5.78)           |
| 19 | IM TU 1000 mg/12 wk          |                    | 0.60(-5.31,6.53)             |
| 20 | IM TE 150 mg/2wk             |                    | 5.25(-3.38,13.81)            |
| 21 | IM TE 200 mg/2wk             |                    | 2.63(-5.77,11.14)            |
| 22 | IM TE 250 mg/3wk             |                    | 3.55(-4.93,12.14)            |
| 23 | IM TE 300 mg/3wk             |                    | <b>10.78(2.42,19.14)</b>     |
| 24 | IM TE 50-400 mg/1-2 wk       |                    | 7.28(-3.63,18.18)            |
| 25 | IM TC 200 mg/2 wk            |                    | -4.27(-13.06,4.61)           |
| 26 | Gel 2.5%, 125 mg/d           | Gel 2% 60 mg/d     | -7.67(-19.47,3.96)           |
| 27 | Gel (scrotal) 2.5%, 25 mg/d  |                    | <b>-11.91(-23.69,-0.16)</b>  |
| 28 | Oral TU 120-160 mg/d         |                    | <b>-14.11(-22.91,-5.33)</b>  |
| 29 | Oral TU 160 mg/d             |                    | <b>-17.96(-25.47,-10.36)</b> |
| 30 | Testosterone pellets 1200 mg |                    | <b>-15.11(-24.85,-5.36)</b>  |
| 31 | IM TU 1000 mg/12 wk          |                    | <b>-11.73(-19.31,-4.11)</b>  |
| 32 | IM TE 150 mg/2wk             |                    | -7.08(-16.88,2.74)           |
| 33 | IM TE 200 mg/2wk             |                    | <b>-9.70(-19.39,-0.03)</b>   |
| 34 | IM TE 250 mg/3wk             |                    | -8.78(-18.41,1.02)           |
| 35 | IM TE 300 mg/3wk             |                    | -1.55(-11.11,8.12)           |
| 36 | IM TE 50-400 mg/1-2 wk       |                    | -5.05(-16.93,6.87)           |
| 37 | IM TC 200 mg/2 wk            |                    | <b>-16.59(-26.63,-6.52)</b>  |
| 38 | Gel (scrotal) 2.5%, 25 mg/d  | Gel 2.5%, 125 mg/d | -4.24(-10.53,1.98)           |
| 39 | Oral TU 120-160 mg/d         |                    | -6.45(-18.26,5.33)           |
| 40 | Oral TU 160 mg/d             |                    | -10.29(-21.22,0.66)          |
| 41 | Testosterone pellets 1200 mg |                    | -7.44(-19.87,5.14)           |
| 42 | IM TU 1000 mg/12 wk          |                    | -4.06(-14.99,6.89)           |
| 43 | IM TE 150 mg/2wk             |                    | 0.59(-12.00,13.23)           |
| 44 | IM TE 200 mg/2wk             |                    | -2.03(-14.56,10.54)          |
| 45 |                              |                    |                              |
| 46 |                              |                    |                              |
| 47 |                              |                    |                              |
| 48 |                              |                    |                              |
| 49 |                              |                    |                              |
| 50 |                              |                    |                              |
| 51 |                              |                    |                              |
| 52 |                              |                    |                              |
| 53 |                              |                    |                              |
| 54 |                              |                    |                              |
| 55 |                              |                    |                              |
| 56 |                              |                    |                              |
| 57 |                              |                    |                              |
| 58 |                              |                    |                              |
| 59 |                              |                    |                              |
| 60 |                              |                    |                              |

|    |                              |                              |                          |
|----|------------------------------|------------------------------|--------------------------|
| 1  |                              |                              |                          |
| 2  |                              |                              |                          |
| 3  | IM TE 250 mg/3wk             |                              | -1.11(-13.58,11.45)      |
| 4  | IM TE 300 mg/3wk             |                              | 6.12(-6.29,18.59)        |
| 5  | IM TE 50-400 mg/1-2 wk       |                              | 2.62(-11.57,17.04)       |
| 6  |                              |                              |                          |
| 7  | IM TC 200 mg/2 wk            |                              | -8.92(-21.55,3.89)       |
| 8  | Oral TU 120-160 mg/d         | Gel (scrotal) 2.5%, 25 mg/d  | -2.21(-14.01,9.62)       |
| 9  | Oral TU 160 mg/d             |                              | -6.05(-16.91,4.92)       |
| 10 |                              |                              |                          |
| 11 | Testosterone pellets 1200 mg |                              | -3.21(-15.72,9.40)       |
| 12 | IM TU 1000 mg/12 wk          |                              | 0.18(-10.74,11.14)       |
| 13 |                              |                              |                          |
| 14 | IM TE 150 mg/2wk             |                              | 4.82(-7.68,17.43)        |
| 15 | IM TE 200 mg/2wk             |                              | 2.21(-10.23,14.82)       |
| 16 | IM TE 250 mg/3wk             |                              | 3.13(-9.48,15.73)        |
| 17 | IM TE 300 mg/3wk             |                              | 10.36(-2.02,22.83)       |
| 18 |                              |                              |                          |
| 19 | IM TE 50-400 mg/1-2 wk       |                              | 6.85(-7.36,21.24)        |
| 20 |                              |                              |                          |
| 21 | IM TC 200 mg/2 wk            |                              | -4.69(-17.36,8.11)       |
| 22 | Oral TU 160 mg/d             | Oral TU 120-160 mg/d         | -3.84(-11.38,3.69)       |
| 23 |                              |                              |                          |
| 24 | Testosterone pellets 1200 mg |                              | -1.00(-10.73,8.75)       |
| 25 | IM TU 1000 mg/12 wk          |                              | 2.39(-5.28,10.08)        |
| 26 | IM TE 150 mg/2wk             |                              | 7.03(-2.78,16.80)        |
| 27 | IM TE 200 mg/2wk             |                              | 4.42(-5.26,14.13)        |
| 28 | IM TE 250 mg/3wk             |                              | 5.33(-4.33,15.11)        |
| 29 | IM TE 300 mg/3wk             |                              | <b>12.57(2.91,22.18)</b> |
| 30 |                              |                              |                          |
| 31 | IM TE 50-400 mg/1-2 wk       |                              | 9.06(-2.84,21.05)        |
| 32 | IM TC 200 mg/2 wk            |                              | -2.48(-12.54,7.57)       |
| 33 |                              |                              |                          |
| 34 | Testosterone pellets 1200 mg | Oral TU 160 mg/d             | 2.84(-3.35,9.02)         |
| 35 | IM TU 1000 mg/12 wk          |                              | <b>6.23(1.04,11.41)</b>  |
| 36 | IM TE 150 mg/2wk             |                              | <b>10.87(2.16,19.57)</b> |
| 37 | IM TE 200 mg/2wk             |                              | 8.26(-0.33,16.82)        |
| 38 | IM TE 250 mg/3wk             |                              | <b>9.18(3.03,15.42)</b>  |
| 39 | IM TE 300 mg/3wk             |                              | <b>16.41(7.93,25.00)</b> |
| 40 | IM TE 50-400 mg/1-2 wk       |                              | <b>12.90(1.81,23.95)</b> |
| 41 |                              |                              |                          |
| 42 | IM TC 200 mg/2 wk            |                              | 1.36(-7.75,10.40)        |
| 43 | IM TU 1000 mg/12 wk          | Testosterone pellets 1200 mg | 3.38(-4.67,11.50)        |
| 44 | IM TE 150 mg/2wk             |                              | 8.03(-2.77,18.77)        |
| 45 | IM TE 200 mg/2wk             |                              | 5.42(-5.01,16.06)        |
| 46 | IM TE 250 mg/3wk             |                              | <b>6.33(0.97,11.73)</b>  |
| 47 | IM TE 300 mg/3wk             |                              | <b>13.57(3.19,24.08)</b> |
| 48 | IM TE 50-400 mg/1-2 wk       |                              | 10.06(-2.53,22.73)       |
| 49 |                              |                              |                          |
| 50 | IM TC 200 mg/2 wk            |                              | -1.48(-12.38,9.46)       |
| 51 | IM TE 150 mg/2wk             | IM TU 1000 mg/12 wk          | 4.65(-4.13,13.37)        |
| 52 | IM TE 200 mg/2wk             |                              | 2.03(-6.70,10.69)        |
| 53 | IM TE 250 mg/3wk             |                              | 2.95(-5.08,11.11)        |
| 54 | IM TE 300 mg/3wk             |                              | <b>10.18(1.58,18.75)</b> |
| 55 |                              |                              |                          |
| 56 |                              |                              |                          |
| 57 |                              |                              |                          |
| 58 |                              |                              |                          |
| 59 |                              |                              |                          |
| 60 |                              |                              |                          |

|                        |                        |                             |
|------------------------|------------------------|-----------------------------|
| IM TE 50-400 mg/1-2 wk |                        | 6.68(-4.45,17.75)           |
| IM TC 200 mg/2 wk      |                        | -4.86(-13.89,4.19)          |
| IM TE 200 mg/2wk       | IM TE 150 mg/2wk       | -2.61(-13.28,8.17)          |
| IM TE 250 mg/3wk       |                        | -1.70(-12.39,9.20)          |
| IM TE 300 mg/3wk       |                        | 5.54(-5.10,16.15)           |
| IM TE 50-400 mg/1-2 wk |                        | 2.03(-10.78,14.82)          |
| IM TC 200 mg/2 wk      |                        | -9.51(-20.53,1.51)          |
| IM TE 250 mg/3wk       | IM TE 200 mg/2wk       | 0.92(-9.64,11.36)           |
| IM TE 300 mg/3wk       |                        | 8.15(-2.38,18.61)           |
| IM TE 50-400 mg/1-2 wk |                        | 4.64(-7.93,17.27)           |
| IM TC 200 mg/2 wk      |                        | -6.90(-17.80,4.00)          |
| IM TE 300 mg/3wk       | IM TE 250 mg/3wk       | 7.23(-3.23,17.75)           |
| IM TE 50-400 mg/1-2 wk |                        | 3.73(-8.88,16.28)           |
| IM TC 200 mg/2 wk      | IM TE 300 mg/3wk       | -7.81(-18.75,3.15)          |
| IM TE 50-400 mg/1-2 wk |                        | -3.51(-16.11,8.94)          |
| IM TC 200 mg/2 wk      |                        | <b>-15.05(-25.92,-4.21)</b> |
| IM TC 200 mg/2 wk      | IM TE 50-400 mg/1-2 wk | -11.54(-24.57,1.32)         |

**eTable 10: Total testosterone levels at the end of treatment – Bayesian network meta-analysis\***

\*Random effects model. Analysis is based on mean total testosterone level after treatment. A positive mean difference indicates a statistically significant improvement in total testosterone level. Significant changes are indicated by use of bold and colour (green indicates that the treatment is significantly better than the reference, while red indicates that the treatment is significantly worse than the reference). White indicates no significant difference between treatment and reference.

| Treatment                    | Reference | Mean difference<br>(95% credible interval) |
|------------------------------|-----------|--------------------------------------------|
| Patch 4.8 mg/d               | Placebo   | 8.00(-3.40,19.24)                          |
| Patch 5 mg/d                 |           | 4.74(1.65,7.84)                            |
| Gel 1% 5 mg/d                |           | 3.66(-4.21,11.57)                          |
| Gel 1% 50 mg/d               |           | 6.54(4.27,8.85)                            |
| Gel 1% 75 mg/d               |           | 6.49(0.92,12.04)                           |
| Gel 1% 100 mg/d              |           | 9.76(6.92,12.61)                           |
| Gel 2% 60 mg/d               |           | 19.76(12.66,26.85)                         |
| Gel 2.5%, 125 mg/d           |           | 8.44(0.75,16.16)                           |
| Gel (scrotal) 2.5%, 25 mg/d  |           | 4.19(-3.53,11.91)                          |
| Solution 2%, 60 mg/d         |           | 8.47(0.47,16.40)                           |
| Oral TU 120 mg/d             |           | 4.32(-2.98,11.63)                          |
| Oral TU 160 mg/d             |           | 1.40(-2.28,5.08)                           |
| Oral TU 120-160 mg/d         |           | 5.69(-1.33,12.73)                          |
| Testosterone pellets 1200 mg |           | 2.77(-3.99,9.50)                           |
| IM TU 1000 mg/9 wk           |           | 16.32(6.99,25.58)                          |
| IM TU 1000 mg/10 wk          |           | 5.70(0.07,11.29)                           |



|                              |                |                     |
|------------------------------|----------------|---------------------|
| IM TU 1000 mg/12 wk          |                | 8.45(5.99,10.90)    |
| IM TE 100 mg/wk              |                | 9.52(4.08,14.91)    |
| IM TE 125 mg/wk              |                | 6.76(-3.38,16.87)   |
| IM TE 150 mg/2wk             |                | 12.71(4.36,21.09)   |
| IM TE 200 mg/2wk             |                | 10.67(5.96,15.35)   |
| IM TE 250 mg/3wk             |                | 8.33(2.98,13.71)    |
| IM TE 300 mg/3wk             |                | 18.26(9.96,26.49)   |
| IM TE 50-400 mg/1-2 wk       |                | 14.74(3.91,25.46)   |
| IM TC 200 mg/2 wk            |                | 3.20(-5.49,11.85)   |
| IM TC 200 mg/4 wk            |                | 1.30(-6.39,8.98)    |
| IM TC 250 mg/2wk             |                | 9.73(1.91,17.51)    |
| Durateston, IM, 250 mg/4wk   |                | 1.67(-6.17,9.42)    |
| Patch 5 mg/d                 | Patch 4.8 mg/d | -3.26(-14.89,8.56)  |
| Gel 1% 5 mg/d                |                | -4.34(-18.04,9.54)  |
| Gel 1% 50 mg/d               |                | -1.46(-12.93,10.15) |
| Gel 1% 75 mg/d               |                | -1.51(-14.10,11.24) |
| Gel 1% 100 mg/d              |                | 1.76(-9.83,13.46)   |
| Gel 2% 60 mg/d               |                | 11.76(-1.57,25.26)  |
| Gel 2.5%, 125 mg/d           |                | 0.44(-13.20,14.18)  |
| Gel (scrotal) 2.5%, 25 mg/d  |                | -3.81(-17.47,9.95)  |
| Solution 2%, 60 mg/d         |                | 0.47(-13.38,14.35)  |
| Oral TU 120 mg/d             |                | -3.68(-17.02,9.84)  |
| Oral TU 160 mg/d             |                | -6.60(-17.82,4.81)  |
| Oral TU 120-160 mg/d         |                | -2.31(-15.69,11.06) |
| Testosterone pellets 1200 mg |                | -5.23(-16.69,6.32)  |
| IM TU 1000 mg/9 wk           |                | 8.32(-4.22,20.91)   |
| IM TU 1000 mg/10 wk          |                | -2.30(-14.89,10.43) |
| IM TU 1000 mg/12 wk          |                | 0.45(-11.02,12.05)  |
| IM TE 100 mg/wk              |                | 1.52(-10.96,14.13)  |
| IM TE 125 mg/wk              |                | -1.24(-16.45,13.89) |
| IM TE 150 mg/2wk             |                | 4.71(-9.35,18.84)   |
| IM TE 200 mg/2wk             |                | 2.67(-9.60,14.94)   |
| IM TE 250 mg/3wk             |                | 0.33(-9.63,10.45)   |
| IM TE 300 mg/3wk             |                | 10.26(-3.79,24.37)  |
| IM TE 50-400 mg/1-2 wk       |                | 6.75(-8.90,22.49)   |
| IM TC 200 mg/2 wk            |                | -4.80(-19.10,9.52)  |
| IM TC 200 mg/4 wk            |                | -6.70(-20.28,7.08)  |
| IM TC 250 mg/2wk             |                | 1.73(-11.91,15.43)  |
| Durateston, IM, 250 mg/4wk   |                | -6.33(-20.01,7.57)  |
| Gel 1% 5 mg/d                | Patch 5 mg/d   | -1.08(-9.49,7.42)   |
| Gel 1% 50 mg/d               |                | 1.80(-1.49,5.16)    |
| Gel 1% 75 mg/d               |                | 1.76(-4.64,8.14)    |

|    |                              |               |                    |
|----|------------------------------|---------------|--------------------|
| 1  |                              |               |                    |
| 2  |                              |               |                    |
| 3  | Gel 1% 100 mg/d              |               | 5.02(1.52,8.49)    |
| 4  | Gel 2% 60 mg/d               |               | 15.02(7.19,22.80)  |
| 5  | Gel 2.5%, 125 mg/d           |               | 3.70(-3.39,10.73)  |
| 6  | Gel (scrotal) 2.5%, 25 mg/d  |               | -0.55(-7.68,6.53)  |
| 7  |                              |               |                    |
| 8  | Solution 2%, 60 mg/d         |               | 3.73(-4.85,12.32)  |
| 9  |                              |               |                    |
| 10 | Oral TU 120 mg/d             |               | -0.41(-8.32,7.44)  |
| 11 | Oral TU 160 mg/d             |               | -3.33(-8.17,1.43)  |
| 12 | Oral TU 120-160 mg/d         |               | 0.95(-6.78,8.61)   |
| 13 | Testosterone pellets 1200 mg |               | -1.97(-9.42,5.39)  |
| 14 |                              |               |                    |
| 15 | IM TU 1000 mg/9 wk           |               | 11.58(1.73,21.42)  |
| 16 | IM TU 1000 mg/10 wk          |               | 0.96(-5.42,7.38)   |
| 17 | IM TU 1000 mg/12 wk          |               | 3.72(-0.31,7.66)   |
| 18 | IM TE 100 mg/wk              |               | 4.78(-1.44,10.97)  |
| 19 |                              |               |                    |
| 20 | IM TE 125 mg/wk              |               | 2.02(-8.51,12.56)  |
| 21 | IM TE 150 mg/2wk             |               | 7.97(-0.95,16.86)  |
| 22 | IM TE 200 mg/2wk             |               | 5.93(0.94,10.87)   |
| 23 | IM TE 250 mg/3wk             |               | 3.59(-2.64,9.81)   |
| 24 | IM TE 300 mg/3wk             |               | 13.52(4.66,22.31)  |
| 25 |                              |               |                    |
| 26 | IM TE 50-400 mg/1-2 wk       |               | 10.01(-1.36,21.18) |
| 27 | IM TC 200 mg/2 wk            |               | -1.54(-10.74,7.65) |
| 28 | IM TC 200 mg/4 wk            |               | -3.44(-11.77,4.80) |
| 29 | IM TC 250 mg/2wk             |               | 4.99(-3.43,13.41)  |
| 30 | Durateston, IM, 250 mg/4wk   |               | -3.07(-11.56,5.28) |
| 31 | Gel 1% 50 mg/d               | Gel 1% 5 mg/d | 2.88(-5.34,11.08)  |
| 32 | Gel 1% 75 mg/d               |               | 2.83(-6.84,12.54)  |
| 33 | Gel 1% 100 mg/d              |               | 6.10(-2.30,14.48)  |
| 34 | Gel 2% 60 mg/d               |               | 16.10(5.47,26.65)  |
| 35 | Gel 2.5%, 125 mg/d           |               | 4.78(-6.22,15.83)  |
| 36 | Gel (scrotal) 2.5%, 25 mg/d  |               | 0.53(-10.48,11.48) |
| 37 | Solution 2%, 60 mg/d         |               | 4.81(-6.33,15.99)  |
| 38 | Oral TU 120 mg/d             |               | 0.66(-9.98,11.41)  |
| 39 | Oral TU 160 mg/d             |               | -2.26(-10.97,6.42) |
| 40 | Oral TU 120-160 mg/d         |               | 2.02(-8.54,12.63)  |
| 41 | Testosterone pellets 1200 mg |               | -0.89(-11.28,9.45) |
| 42 |                              |               |                    |
| 43 | IM TU 1000 mg/9 wk           |               | 12.66(0.32,24.84)  |
| 44 | IM TU 1000 mg/10 wk          |               | 2.04(-7.64,11.75)  |
| 45 | IM TU 1000 mg/12 wk          |               | 4.79(-3.47,12.95)  |
| 46 | IM TE 100 mg/wk              |               | 5.86(-3.72,15.40)  |
| 47 | IM TE 125 mg/wk              |               | 3.10(-9.72,15.94)  |
| 48 | IM TE 150 mg/2wk             |               | 9.05(-2.41,20.56)  |
| 49 | IM TE 200 mg/2wk             |               | 7.01(-2.27,16.13)  |
| 50 | IM TE 250 mg/3wk             |               | 4.67(-4.87,14.18)  |
| 51 |                              |               |                    |
| 52 |                              |               |                    |
| 53 |                              |               |                    |
| 54 |                              |               |                    |
| 55 |                              |               |                    |
| 56 |                              |               |                    |
| 57 |                              |               |                    |
| 58 |                              |               |                    |
| 59 |                              |               |                    |
| 60 |                              |               |                    |

|                              |                |                     |
|------------------------------|----------------|---------------------|
| IM TE 300 mg/3wk             |                | 14.60(3.17,26.00)   |
| IM TE 50-400 mg/1-2 wk       |                | 11.08(-2.35,24.44)  |
| IM TC 200 mg/2 wk            |                | -0.46(-12.22,11.21) |
| IM TC 200 mg/4 wk            |                | -2.37(-13.33,8.57)  |
| IM TC 250 mg/2wk             |                | 6.07(-5.05,17.18)   |
| Durateston, IM, 250 mg/4wk   |                | -1.99(-13.08,9.06)  |
| Gel 1% 75 mg/d               | Gel 1% 50 mg/d | -0.05(-6.06,5.96)   |
| Gel 1% 100 mg/d              |                | 3.22(0.05,6.36)     |
| Gel 2% 60 mg/d               |                | 13.22(5.72,20.65)   |
| Gel 2.5%, 125 mg/d           |                | 1.90(-5.89,9.68)    |
| Gel (scrotal) 2.5%, 25 mg/d  |                | -2.35(-10.23,5.47)  |
| Solution 2%, 60 mg/d         |                | 1.93(-6.45,10.21)   |
| Oral TU 120 mg/d             |                | -2.22(-9.89,5.36)   |
| Oral TU 160 mg/d             |                | -5.14(-9.50,-0.83)  |
| Oral TU 120-160 mg/d         |                | -0.86(-8.26,6.53)   |
| Testosterone pellets 1200 mg |                | -3.77(-10.93,3.32)  |
| IM TU 1000 mg/9 wk           |                | 9.78(0.12,19.31)    |
| IM TU 1000 mg/10 wk          |                | -0.84(-6.93,5.22)   |
| IM TU 1000 mg/12 wk          |                | 1.91(-1.49,5.22)    |
| IM TE 100 mg/wk              |                | 2.98(-2.97,8.82)    |
| IM TE 125 mg/wk              |                | 0.22(-10.17,10.56)  |
| IM TE 150 mg/2wk             |                | 6.17(-2.50,14.84)   |
| IM TE 200 mg/2wk             |                | 4.13(-0.98,9.17)    |
| IM TE 250 mg/3wk             |                | 1.79(-4.11,7.62)    |
| IM TE 300 mg/3wk             |                | 11.72(3.13,20.20)   |
| IM TE 50-400 mg/1-2 wk       |                | 8.20(-2.93,19.12)   |
| IM TC 200 mg/2 wk            |                | -3.34(-12.34,5.62)  |
| IM TC 200 mg/4 wk            |                | -5.25(-13.24,2.71)  |
| IM TC 250 mg/2wk             |                | 3.19(-4.96,11.30)   |
| Durateston, IM, 250 mg/4wk   |                | -4.87(-13.08,3.23)  |
| Gel 1% 100 mg/d              | Gel 1% 75 mg/d | 3.26(-3.00,9.49)    |
| Gel 2% 60 mg/d               |                | 13.27(4.21,22.29)   |
| Gel 2.5%, 125 mg/d           |                | 1.95(-7.52,11.42)   |
| Gel (scrotal) 2.5%, 25 mg/d  |                | -2.30(-11.80,7.19)  |
| Solution 2%, 60 mg/d         |                | 1.98(-7.79,11.68)   |
| Oral TU 120 mg/d             |                | -2.17(-11.46,7.10)  |
| Oral TU 160 mg/d             |                | -5.09(-11.81,1.62)  |
| Oral TU 120-160 mg/d         |                | -0.81(-9.76,8.21)   |
| Testosterone pellets 1200 mg |                | -3.72(-12.49,5.06)  |
| IM TU 1000 mg/9 wk           |                | 9.83(-1.12,20.61)   |
| IM TU 1000 mg/10 wk          |                | -0.79(-8.71,7.09)   |
| IM TU 1000 mg/12 wk          |                | 1.96(-4.14,8.02)    |

|    |                              |                 |                       |
|----|------------------------------|-----------------|-----------------------|
| 1  |                              |                 |                       |
| 2  |                              |                 |                       |
| 3  | IM TE 100 mg/wk              |                 | 3.03(-4.78,10.84)     |
| 4  | IM TE 125 mg/wk              |                 | 0.27(-11.29,11.76)    |
| 5  | IM TE 150 mg/2wk             |                 | 6.21(-3.81,16.26)     |
| 6  | IM TE 200 mg/2wk             |                 | 4.18(-3.13,11.49)     |
| 7  | IM TE 250 mg/3wk             |                 | 1.84(-5.91,9.60)      |
| 8  | IM TE 300 mg/3wk             |                 | 11.76(1.77,21.71)     |
| 9  | IM TE 50-400 mg/1-2 wk       |                 | 8.25(-3.95,20.40)     |
| 10 | IM TC 200 mg/2 wk            |                 | -3.30(-13.57,7.03)    |
| 11 | IM TC 200 mg/4 wk            |                 | -5.20(-14.75,4.38)    |
| 12 | IM TC 250 mg/2wk             |                 | 3.24(-6.31,12.84)     |
| 13 | Durateston, IM, 250 mg/4wk   |                 | -4.82(-14.54,4.73)    |
| 14 | Gel 2% 60 mg/d               | Gel 1% 100 mg/d | 10.00(2.31,17.65)     |
| 15 | Gel 2.5%, 125 mg/d           |                 | -1.32(-9.14,6.53)     |
| 16 | Gel (scrotal) 2.5%, 25 mg/d  |                 | -5.57(-13.46,2.30)    |
| 17 | Solution 2%, 60 mg/d         |                 | -1.29(-9.81,7.12)     |
| 18 | Oral TU 120 mg/d             |                 | -5.43(-13.31,2.41)    |
| 19 | Oral TU 160 mg/d             |                 | -8.35(-13.01,-3.72)   |
| 20 | Oral TU 120-160 mg/d         |                 | -4.07(-11.66,3.46)    |
| 21 | Testosterone pellets 1200 mg |                 | -6.98(-14.31,0.32)    |
| 22 | IM TU 1000 mg/9 wk           |                 | 6.56(-3.21,16.30)     |
| 23 | IM TU 1000 mg/10 wk          |                 | -4.05(-10.36,2.25)    |
| 24 | IM TU 1000 mg/12 wk          |                 | -1.30(-5.08,2.39)     |
| 25 | IM TE 100 mg/wk              |                 | -0.24(-6.33,5.86)     |
| 26 | IM TE 125 mg/wk              |                 | -3.00(-13.56,7.45)    |
| 27 | IM TE 150 mg/2wk             |                 | 2.95(-5.87,11.76)     |
| 28 | IM TE 200 mg/2wk             |                 | 0.91(-4.37,6.24)      |
| 29 | IM TE 250 mg/3wk             |                 | -1.43(-7.51,4.70)     |
| 30 | IM TE 300 mg/3wk             |                 | 8.50(-0.26,17.19)     |
| 31 | IM TE 50-400 mg/1-2 wk       |                 | 4.99(-6.29,16.05)     |
| 32 | IM TC 200 mg/2 wk            |                 | -6.56(-15.67,2.62)    |
| 33 | IM TC 200 mg/4 wk            |                 | -8.46(-16.58,-0.35)   |
| 34 | IM TC 250 mg/2wk             |                 | -0.03(-8.32,8.21)     |
| 35 | Durateston, IM, 250 mg/4wk   |                 | -8.09(-16.37,0.19)    |
| 36 | Gel 2.5%, 125 mg/d           | Gel 2% 60 mg/d  | -11.32(-21.81,-0.76)  |
| 37 | Gel (scrotal) 2.5%, 25 mg/d  |                 | -15.57(-26.01,-5.14)  |
| 38 | Solution 2%, 60 mg/d         |                 | -11.29(-22.04,-0.61)  |
| 39 | Oral TU 120 mg/d             |                 | -15.44(-25.55,-5.26)  |
| 40 | Oral TU 160 mg/d             |                 | -18.36(-26.38,-10.40) |
| 41 | Oral TU 120-160 mg/d         |                 | -14.08(-24.01,-4.07)  |
| 42 | Testosterone pellets 1200 mg |                 | -16.99(-26.76,-7.21)  |
| 43 | IM TU 1000 mg/9 wk           |                 | -3.44(-15.22,8.28)    |
| 44 | IM TU 1000 mg/10 wk          |                 | -14.06(-23.21,-4.99)  |
| 45 |                              |                 |                       |
| 46 |                              |                 |                       |
| 47 |                              |                 |                       |
| 48 |                              |                 |                       |
| 49 |                              |                 |                       |
| 50 |                              |                 |                       |
| 51 |                              |                 |                       |
| 52 |                              |                 |                       |
| 53 |                              |                 |                       |
| 54 |                              |                 |                       |
| 55 |                              |                 |                       |
| 56 |                              |                 |                       |
| 57 |                              |                 |                       |
| 58 |                              |                 |                       |
| 59 |                              |                 |                       |
| 60 |                              |                 |                       |

|    |                              |                             |                      |
|----|------------------------------|-----------------------------|----------------------|
| 1  |                              |                             |                      |
| 2  |                              |                             |                      |
| 3  | IM TU 1000 mg/12 wk          |                             | -11.31(-18.81,-3.79) |
| 4  | IM TE 100 mg/wk              |                             | -10.24(-19.18,-1.26) |
| 5  | IM TE 125 mg/wk              |                             | -13.00(-25.43,-0.67) |
| 6  | IM TE 150 mg/2wk             |                             | -7.05(-18.02,3.89)   |
| 7  | IM TE 200 mg/2wk             |                             | -9.09(-17.56,-0.59)  |
| 8  | IM TE 250 mg/3wk             |                             | -11.43(-20.28,-2.55) |
| 9  | IM TE 300 mg/3wk             |                             | -1.50(-12.41,9.29)   |
| 10 | IM TE 50-400 mg/1-2 wk       |                             | -5.02(-17.95,7.94)   |
| 11 | IM TC 200 mg/2 wk            |                             | -16.56(-27.65,-5.38) |
| 12 | IM TC 200 mg/4 wk            |                             | -18.47(-28.79,-7.99) |
| 13 | IM TC 250 mg/2wk             |                             | -10.03(-20.60,0.55)  |
| 14 | Durateston, IM, 250 mg/4wk   |                             | -18.09(-28.55,-7.51) |
| 15 | Gel (scrotal) 2.5%, 25 mg/d  | Gel 2.5%, 125 mg/d          | -4.25(-11.32,2.85)   |
| 16 | Solution 2%, 60 mg/d         |                             | 0.03(-11.01,11.05)   |
| 17 | Oral TU 120 mg/d             |                             | -4.11(-14.77,6.43)   |
| 18 | Oral TU 160 mg/d             |                             | -7.03(-15.56,1.49)   |
| 19 | Oral TU 120-160 mg/d         |                             | -2.75(-13.20,7.62)   |
| 20 | Testosterone pellets 1200 mg |                             | -5.67(-15.93,4.50)   |
| 21 | IM TU 1000 mg/9 wk           |                             | 7.88(-4.23,19.98)    |
| 22 | IM TU 1000 mg/10 wk          |                             | -2.74(-12.35,6.74)   |
| 23 | IM TU 1000 mg/12 wk          |                             | 0.02(-8.05,8.09)     |
| 24 | IM TE 100 mg/wk              |                             | 1.08(-8.38,10.49)    |
| 25 | IM TE 125 mg/wk              |                             | -1.68(-14.40,11.04)  |
| 26 | IM TE 150 mg/2wk             |                             | 4.27(-7.05,15.61)    |
| 27 | IM TE 200 mg/2wk             |                             | 2.23(-6.41,10.86)    |
| 28 | IM TE 250 mg/3wk             |                             | -0.11(-9.59,9.27)    |
| 29 | IM TE 300 mg/3wk             |                             | 9.82(-1.46,21.10)    |
| 30 | IM TE 50-400 mg/1-2 wk       |                             | 6.31(-7.08,19.61)    |
| 31 | IM TC 200 mg/2 wk            |                             | -5.24(-16.86,6.39)   |
| 32 | IM TC 200 mg/4 wk            |                             | -7.14(-18.05,3.70)   |
| 33 | IM TC 250 mg/2wk             |                             | 1.29(-9.68,12.14)    |
| 34 | Durateston, IM, 250 mg/4wk   |                             | -6.77(-17.77,4.17)   |
| 35 | Solution 2%, 60 mg/d         | Gel (scrotal) 2.5%, 25 mg/d | 4.28(-6.76,15.29)    |
| 36 | Oral TU 120 mg/d             |                             | 0.13(-10.41,10.69)   |
| 37 | Oral TU 160 mg/d             |                             | -2.79(-11.32,5.78)   |
| 38 | Oral TU 120-160 mg/d         |                             | 1.49(-8.95,11.85)    |
| 39 | Testosterone pellets 1200 mg |                             | -1.42(-11.69,8.77)   |
| 40 | IM TU 1000 mg/9 wk           |                             | 12.13(-0.05,24.28)   |
| 41 | IM TU 1000 mg/10 wk          |                             | 1.51(-8.10,11.01)    |
| 42 | IM TU 1000 mg/12 wk          |                             | 4.26(-3.85,12.36)    |
| 43 | IM TE 100 mg/wk              |                             | 5.33(-4.13,14.73)    |
| 44 | IM TE 125 mg/wk              |                             | 2.57(-10.20,15.23)   |
| 45 |                              |                             |                      |
| 46 |                              |                             |                      |
| 47 |                              |                             |                      |
| 48 |                              |                             |                      |
| 49 |                              |                             |                      |
| 50 |                              |                             |                      |
| 51 |                              |                             |                      |
| 52 |                              |                             |                      |
| 53 |                              |                             |                      |
| 54 |                              |                             |                      |
| 55 |                              |                             |                      |
| 56 |                              |                             |                      |
| 57 |                              |                             |                      |
| 58 |                              |                             |                      |
| 59 |                              |                             |                      |
| 60 |                              |                             |                      |

|    |                              |                      |                     |
|----|------------------------------|----------------------|---------------------|
| 1  |                              |                      |                     |
| 2  |                              |                      |                     |
| 3  | IM TE 150 mg/2wk             |                      | 8.52(-2.86,19.92)   |
| 4  | IM TE 200 mg/2wk             |                      | 6.48(-2.21,15.12)   |
| 5  | IM TE 250 mg/3wk             |                      | 4.14(-5.23,13.54)   |
| 6  | IM TE 300 mg/3wk             |                      | 14.07(2.81,25.31)   |
| 7  |                              |                      |                     |
| 8  | IM TE 50-400 mg/1-2 wk       |                      | 10.55(-2.91,23.84)  |
| 9  |                              |                      |                     |
| 10 | IM TC 200 mg/2 wk            |                      | -0.99(-12.60,10.58) |
| 11 | IM TC 200 mg/4 wk            |                      | -2.90(-13.82,8.03)  |
| 12 | IM TC 250 mg/2wk             |                      | 5.54(-5.44,16.60)   |
| 13 | Durateston, IM, 250 mg/4wk   |                      | -2.52(-13.52,8.43)  |
| 14 | Oral TU 120 mg/d             | Solution 2%, 60 mg/d | -4.15(-14.97,6.71)  |
| 15 | Oral TU 160 mg/d             |                      | -7.07(-15.82,1.75)  |
| 16 | Oral TU 120-160 mg/d         |                      | -2.79(-13.42,7.91)  |
| 17 | Testosterone pellets 1200 mg |                      | -5.70(-16.19,4.77)  |
| 18 |                              |                      |                     |
| 19 | IM TU 1000 mg/9 wk           |                      | 7.85(-4.39,20.17)   |
| 20 | IM TU 1000 mg/10 wk          |                      | -2.77(-12.56,7.00)  |
| 21 | IM TU 1000 mg/12 wk          |                      | -0.02(-8.34,8.36)   |
| 22 |                              |                      |                     |
| 23 | IM TE 100 mg/wk              |                      | 1.05(-8.64,10.74)   |
| 24 | IM TE 125 mg/wk              |                      | -1.71(-14.70,11.26) |
| 25 | IM TE 150 mg/2wk             |                      | 4.24(-7.33,15.76)   |
| 26 | IM TE 200 mg/2wk             |                      | 2.20(-6.98,11.47)   |
| 27 | IM TE 250 mg/3wk             |                      | -0.14(-9.75,9.50)   |
| 28 | IM TE 300 mg/3wk             |                      | 9.79(-1.75,21.38)   |
| 29 | IM TE 50-400 mg/1-2 wk       |                      | 6.27(-7.18,19.70)   |
| 30 | IM TC 200 mg/2 wk            |                      | -5.27(-17.13,6.58)  |
| 31 | IM TC 200 mg/4 wk            |                      | -7.17(-18.19,4.01)  |
| 32 | IM TC 250 mg/2wk             |                      | 1.26(-9.92,12.47)   |
| 33 | Durateston, IM, 250 mg/4wk   |                      | -6.80(-17.95,4.39)  |
| 34 | Oral TU 160 mg/d             | Oral TU 120 mg/d     | -2.92(-11.18,5.30)  |
| 35 | Oral TU 120-160 mg/d         |                      | 1.36(-8.75,11.51)   |
| 36 | Testosterone pellets 1200 mg |                      | -1.55(-11.47,8.35)  |
| 37 |                              |                      |                     |
| 38 | IM TU 1000 mg/9 wk           |                      | 11.99(0.22,23.80)   |
| 39 | IM TU 1000 mg/10 wk          |                      | 1.38(-7.80,10.65)   |
| 40 | IM TU 1000 mg/12 wk          |                      | 4.13(-3.60,11.79)   |
| 41 |                              |                      |                     |
| 42 | IM TE 100 mg/wk              |                      | 5.20(-3.98,14.29)   |
| 43 | IM TE 125 mg/wk              |                      | 2.44(-10.06,15.00)  |
| 44 | IM TE 150 mg/2wk             |                      | 8.38(-2.65,19.47)   |
| 45 | IM TE 200 mg/2wk             |                      | 6.35(-2.24,15.06)   |
| 46 | IM TE 250 mg/3wk             |                      | 4.01(-5.04,13.13)   |
| 47 | IM TE 300 mg/3wk             |                      | 13.93(2.85,24.90)   |
| 48 | IM TE 50-400 mg/1-2 wk       |                      | 10.42(-2.47,23.36)  |
| 49 |                              |                      |                     |
| 50 | IM TC 200 mg/2 wk            |                      | -1.13(-12.50,10.16) |
| 51 | IM TC 200 mg/4 wk            |                      | -3.03(-13.54,7.52)  |
| 52 |                              |                      |                     |
| 53 |                              |                      |                     |
| 54 |                              |                      |                     |
| 55 |                              |                      |                     |
| 56 |                              |                      |                     |
| 57 |                              |                      |                     |
| 58 |                              |                      |                     |
| 59 |                              |                      |                     |
| 60 |                              |                      |                     |

|    |                              |                              |                    |
|----|------------------------------|------------------------------|--------------------|
| 1  | IM TC 250 mg/2wk             |                              | 5.41(-5.24,16.03)  |
| 2  |                              |                              |                    |
| 3  | Durateston, IM, 250 mg/4wk   |                              | -2.65(-13.24,7.90) |
| 4  |                              |                              |                    |
| 5  | Oral TU 120-160 mg/d         | Oral TU 160 mg/d             | 4.28(-3.65,12.24)  |
| 6  |                              |                              |                    |
| 7  | Testosterone pellets 1200 mg |                              | 1.37(-5.02,7.65)   |
| 8  | IM TU 1000 mg/9 wk           |                              | 14.91(5.60,24.22)  |
| 9  | IM TU 1000 mg/10 wk          |                              | 4.30(-2.44,10.98)  |
| 10 | IM TU 1000 mg/12 wk          |                              | 7.05(2.88,11.22)   |
| 11 | IM TE 100 mg/wk              |                              | 8.12(1.58,14.65)   |
| 12 | IM TE 125 mg/wk              |                              | 5.36(-5.44,16.14)  |
| 13 | IM TE 150 mg/2wk             |                              | 11.30(2.17,20.50)  |
| 14 | IM TE 200 mg/2wk             |                              | 9.27(3.31,15.24)   |
| 15 | IM TE 250 mg/3wk             |                              | 6.93(1.62,12.24)   |
| 16 | IM TE 300 mg/3wk             |                              | 16.85(7.78,25.85)  |
| 17 |                              |                              |                    |
| 18 | IM TE 50-400 mg/1-2 wk       |                              | 13.34(1.90,24.69)  |
| 19 |                              |                              |                    |
| 20 | IM TC 200 mg/2 wk            |                              | 1.79(-7.65,11.19)  |
| 21 | IM TC 200 mg/4 wk            |                              | -0.11(-8.45,8.32)  |
| 22 | IM TC 250 mg/2wk             |                              | 8.33(-0.32,16.90)  |
| 23 | Durateston, IM, 250 mg/4wk   |                              | 0.27(-8.25,8.73)   |
| 24 | Testosterone pellets 1200 mg | Oral TU 120-160 mg/d         | -2.91(-12.66,6.81) |
| 25 | IM TU 1000 mg/9 wk           |                              | 10.63(-1.05,22.19) |
| 26 | IM TU 1000 mg/10 wk          |                              | 0.02(-8.97,9.02)   |
| 27 | IM TU 1000 mg/12 wk          |                              | 2.77(-4.70,10.19)  |
| 28 | IM TE 100 mg/wk              |                              | 3.83(-5.07,12.72)  |
| 29 | IM TE 125 mg/wk              |                              | 1.08(-11.31,13.34) |
| 30 | IM TE 150 mg/2wk             |                              | 7.02(-3.93,18.04)  |
| 31 | IM TE 200 mg/2wk             |                              | 4.99(-3.53,13.53)  |
| 32 | IM TE 250 mg/3wk             |                              | 2.65(-6.16,11.47)  |
| 33 | IM TE 300 mg/3wk             |                              | 12.57(1.68,23.38)  |
| 34 | IM TE 50-400 mg/1-2 wk       |                              | 9.06(-3.94,21.88)  |
| 35 | IM TC 200 mg/2 wk            |                              | -2.49(-13.64,8.66) |
| 36 | IM TC 200 mg/4 wk            |                              | -4.39(-14.76,6.03) |
| 37 | IM TC 250 mg/2wk             |                              | 4.05(-6.43,14.57)  |
| 38 | Durateston, IM, 250 mg/4wk   |                              | -4.02(-14.52,6.43) |
| 39 | IM TU 1000 mg/9 wk           | Testosterone pellets 1200 mg | 13.55(3.98,23.17)  |
| 40 | IM TU 1000 mg/10 wk          |                              | 2.93(-5.76,11.79)  |
| 41 | IM TU 1000 mg/12 wk          |                              | 5.68(-1.39,12.77)  |
| 42 | IM TE 100 mg/wk              |                              | 6.75(-1.86,15.41)  |
| 43 | IM TE 125 mg/wk              |                              | 3.99(-8.13,16.03)  |
| 44 | IM TE 150 mg/2wk             |                              | 9.93(-0.73,20.72)  |
| 45 | IM TE 200 mg/2wk             |                              | 7.90(-0.28,16.12)  |
| 46 | IM TE 250 mg/3wk             |                              | 5.56(-0.16,11.31)  |
| 47 | IM TE 300 mg/3wk             |                              | 15.48(4.84,26.11)  |
| 48 |                              |                              |                    |
| 49 |                              |                              |                    |
| 50 |                              |                              |                    |
| 51 |                              |                              |                    |
| 52 |                              |                              |                    |
| 53 |                              |                              |                    |
| 54 |                              |                              |                    |
| 55 |                              |                              |                    |
| 56 |                              |                              |                    |
| 57 |                              |                              |                    |
| 58 |                              |                              |                    |
| 59 |                              |                              |                    |
| 60 |                              |                              |                    |

|    |                            |                     |                      |
|----|----------------------------|---------------------|----------------------|
| 1  |                            |                     |                      |
| 2  |                            |                     |                      |
| 3  | IM TE 50-400 mg/1-2 wk     |                     | 11.97(-0.87,24.56)   |
| 4  | IM TC 200 mg/2 wk          |                     | 0.43(-10.60,11.33)   |
| 5  | IM TC 200 mg/4 wk          |                     | -1.48(-11.65,8.68)   |
| 6  |                            |                     |                      |
| 7  | IM TC 250 mg/2wk           |                     | 6.96(-3.27,17.22)    |
| 8  | Durateston, IM, 250 mg/4wk |                     | -1.10(-11.31,9.12)   |
| 9  | IM TU 1000 mg/10 wk        | IM TU 1000 mg/9 wk  | -10.62(-21.47,0.34)  |
| 10 |                            |                     |                      |
| 11 | IM TU 1000 mg/12 wk        |                     | -7.87(-17.42,1.71)   |
| 12 | IM TE 100 mg/wk            |                     | -6.80(-17.58,3.97)   |
| 13 | IM TE 125 mg/wk            |                     | -9.56(-23.43,4.23)   |
| 14 | IM TE 150 mg/2wk           |                     | -3.61(-16.13,8.87)   |
| 15 | IM TE 200 mg/2wk           |                     | -5.65(-16.09,4.77)   |
| 16 | IM TE 250 mg/3wk           |                     | -7.99(-15.63,-0.43)  |
| 17 | IM TE 300 mg/3wk           |                     | 1.94(-10.58,14.38)   |
| 18 |                            |                     |                      |
| 19 | IM TE 50-400 mg/1-2 wk     |                     | -1.57(-15.93,12.57)  |
| 20 | IM TC 200 mg/2 wk          |                     | -13.12(-25.76,-0.50) |
| 21 | IM TC 200 mg/4 wk          |                     | -15.02(-27.02,-2.97) |
| 22 |                            |                     |                      |
| 23 | IM TC 250 mg/2wk           |                     | -6.59(-18.64,5.51)   |
| 24 | Durateston, IM, 250 mg/4wk |                     | -14.65(-26.65,-2.55) |
| 25 |                            |                     |                      |
| 26 | IM TU 1000 mg/12 wk        | IM TU 1000 mg/10 wk | 2.75(-3.39,8.87)     |
| 27 | IM TE 100 mg/wk            |                     | 3.82(-4.02,11.63)    |
| 28 | IM TE 125 mg/wk            |                     | 1.06(-10.55,12.59)   |
| 29 | IM TE 150 mg/2wk           |                     | 7.00(-3.13,17.12)    |
| 30 | IM TE 200 mg/2wk           |                     | 4.97(-2.38,12.33)    |
| 31 | IM TE 250 mg/3wk           |                     | 2.63(-5.20,10.43)    |
| 32 | IM TE 300 mg/3wk           |                     | 12.55(2.61,22.50)    |
| 33 |                            |                     |                      |
| 34 | IM TE 50-400 mg/1-2 wk     |                     | 9.04(-3.15,21.15)    |
| 35 | IM TC 200 mg/2 wk          |                     | -2.51(-12.86,7.88)   |
| 36 | IM TC 200 mg/4 wk          |                     | -4.41(-13.89,5.12)   |
| 37 | IM TC 250 mg/2wk           |                     | 4.03(-5.67,13.61)    |
| 38 | Durateston, IM, 250 mg/4wk |                     | -4.03(-13.63,5.52)   |
| 39 |                            |                     |                      |
| 40 | IM TE 100 mg/wk            | IM TU 1000 mg/12 wk | 1.07(-4.91,7.00)     |
| 41 | IM TE 125 mg/wk            |                     | -1.69(-12.18,8.70)   |
| 42 | IM TE 150 mg/2wk           |                     | 4.25(-4.40,13.04)    |
| 43 | IM TE 200 mg/2wk           |                     | 2.22(-3.10,7.50)     |
| 44 | IM TE 250 mg/3wk           |                     | -0.12(-5.92,5.72)    |
| 45 | IM TE 300 mg/3wk           |                     | 9.80(1.20,18.32)     |
| 46 |                            |                     |                      |
| 47 | IM TE 50-400 mg/1-2 wk     |                     | 6.29(-4.89,17.26)    |
| 48 | IM TC 200 mg/2 wk          |                     | -5.26(-14.26,3.76)   |
| 49 | IM TC 200 mg/4 wk          |                     | -7.16(-14.34,0.12)   |
| 50 | IM TC 250 mg/2wk           |                     | 1.28(-6.89,9.44)     |
| 51 | Durateston, IM, 250 mg/4wk |                     | -6.78(-14.19,0.56)   |
| 52 |                            |                     |                      |
| 53 | IM TE 125 mg/wk            | IM TE 100 mg/wk     | -2.76(-14.21,8.71)   |
| 54 |                            |                     |                      |
| 55 |                            |                     |                      |
| 56 |                            |                     |                      |
| 57 |                            |                     |                      |
| 58 |                            |                     |                      |
| 59 |                            |                     |                      |
| 60 |                            |                     |                      |



|    |                            |                  |                      |
|----|----------------------------|------------------|----------------------|
| 1  | IM TE 150 mg/2wk           |                  | 3.19(-6.80,13.17)    |
| 2  | IM TE 200 mg/2wk           |                  | 1.15(-6.03,8.28)     |
| 3  | IM TE 250 mg/3wk           |                  | -1.19(-8.76,6.47)    |
| 4  | IM TE 300 mg/3wk           |                  | 8.74(-1.14,18.58)    |
| 5  | IM TE 50-400 mg/1-2 wk     |                  | 5.22(-6.94,17.26)    |
| 6  | IM TC 200 mg/2 wk          |                  | -6.32(-16.59,3.99)   |
| 7  | IM TC 200 mg/4 wk          |                  | -8.22(-17.53,1.14)   |
| 8  | IM TC 250 mg/2wk           |                  | 0.21(-9.33,9.74)     |
| 9  | Durateston, IM, 250 mg/4wk |                  | -7.85(-17.40,1.61)   |
| 10 | IM TE 150 mg/2wk           | IM TE 125 mg/wk  | 5.95(-7.16,19.13)    |
| 11 | IM TE 200 mg/2wk           |                  | 3.91(-7.29,15.04)    |
| 12 | IM TE 250 mg/3wk           |                  | 1.57(-9.82,13.12)    |
| 13 | IM TE 300 mg/3wk           |                  | 11.50(-1.54,24.55)   |
| 14 | IM TE 50-400 mg/1-2 wk     |                  | 7.98(-6.80,22.76)    |
| 15 | IM TC 200 mg/2 wk          |                  | -3.56(-16.94,9.75)   |
| 16 | IM TC 200 mg/4 wk          |                  | -5.47(-18.14,7.27)   |
| 17 | IM TC 250 mg/2wk           |                  | 2.97(-9.79,15.85)    |
| 18 | Durateston, IM, 250 mg/4wk |                  | -5.09(-17.80,7.77)   |
| 19 | IM TE 200 mg/2wk           | IM TE 150 mg/2wk | -2.04(-11.66,7.57)   |
| 20 | IM TE 250 mg/3wk           |                  | -4.38(-14.31,5.56)   |
| 21 | IM TE 300 mg/3wk           |                  | 5.55(-6.15,17.34)    |
| 22 | IM TE 50-400 mg/1-2 wk     |                  | 2.04(-11.74,15.72)   |
| 23 | IM TC 200 mg/2 wk          |                  | -9.51(-21.66,2.54)   |
| 24 | IM TC 200 mg/4 wk          |                  | -11.41(-22.70,0.00)  |
| 25 | IM TC 250 mg/2wk           |                  | -2.98(-14.42,8.45)   |
| 26 | Durateston, IM, 250 mg/4wk |                  | -11.04(-22.52,0.42)  |
| 27 | IM TE 250 mg/3wk           | IM TE 200 mg/2wk | -2.34(-9.48,4.87)    |
| 28 | IM TE 300 mg/3wk           |                  | 7.59(-1.89,17.04)    |
| 29 | IM TE 50-400 mg/1-2 wk     |                  | 4.07(-7.82,15.86)    |
| 30 | IM TC 200 mg/2 wk          |                  | -7.47(-17.31,2.38)   |
| 31 | IM TC 200 mg/4 wk          |                  | -9.37(-18.42,-0.35)  |
| 32 | IM TC 250 mg/2wk           |                  | -0.94(-9.99,8.19)    |
| 33 | Durateston, IM, 250 mg/4wk |                  | -9.00(-18.14,0.03)   |
| 34 | IM TE 300 mg/3wk           | IM TE 250 mg/3wk | 9.93(0.08,19.73)     |
| 35 | IM TE 50-400 mg/1-2 wk     |                  | 6.41(-5.72,18.40)    |
| 36 | IM TC 200 mg/2 wk          |                  | -5.13(-15.34,5.05)   |
| 37 | IM TC 200 mg/4 wk          |                  | -7.04(-16.28,2.31)   |
| 38 | IM TC 250 mg/2wk           |                  | 1.40(-8.03,10.77)    |
| 39 | Durateston, IM, 250 mg/4wk |                  | -6.66(-16.10,2.75)   |
| 40 | IM TE 50-400 mg/1-2 wk     | IM TE 300 mg/3wk | -3.51(-17.11,9.98)   |
| 41 | IM TC 200 mg/2 wk          |                  | -15.06(-26.99,-3.12) |
| 42 | IM TC 200 mg/4 wk          |                  | -16.96(-28.18,-5.70) |

|    |                            |                        |                      |
|----|----------------------------|------------------------|----------------------|
| 1  | IM TC 250 mg/2wk           |                        | -8.53(-19.81,2.78)   |
| 2  | Durateston, IM, 250 mg/4wk |                        | -16.59(-27.91,-5.27) |
| 3  | IM TC 200 mg/2 wk          | IM TE 50-400 mg/1-2 wk | -11.55(-25.33,2.34)  |
| 4  | IM TC 200 mg/4 wk          |                        | -13.45(-26.71,-0.08) |
| 5  | IM TC 250 mg/2wk           |                        | -5.01(-18.35,8.45)   |
| 6  | Durateston, IM, 250 mg/4wk |                        | -13.07(-26.35,0.29)  |
| 7  | IM TC 200 mg/4 wk          | IM TC 200 mg/2 wk      | -1.90(-13.46,9.66)   |
| 8  | IM TC 250 mg/2wk           |                        | 6.53(-5.16,18.17)    |
| 9  | Durateston, IM, 250 mg/4wk |                        | -1.53(-13.18,10.07)  |
| 10 | IM TC 250 mg/2wk           | IM TC 200 mg/4 wk      | 8.44(-2.47,19.30)    |
| 11 | Durateston, IM, 250 mg/4wk |                        | 0.37(-6.93,7.65)     |
| 12 | Durateston, IM, 250 mg/4wk | IM TC 250 mg/2wk       | -8.06(-19.21,2.97)   |

eFigure 6: Odds of myocardial infarction associated with the use of any testosterone v. placebo

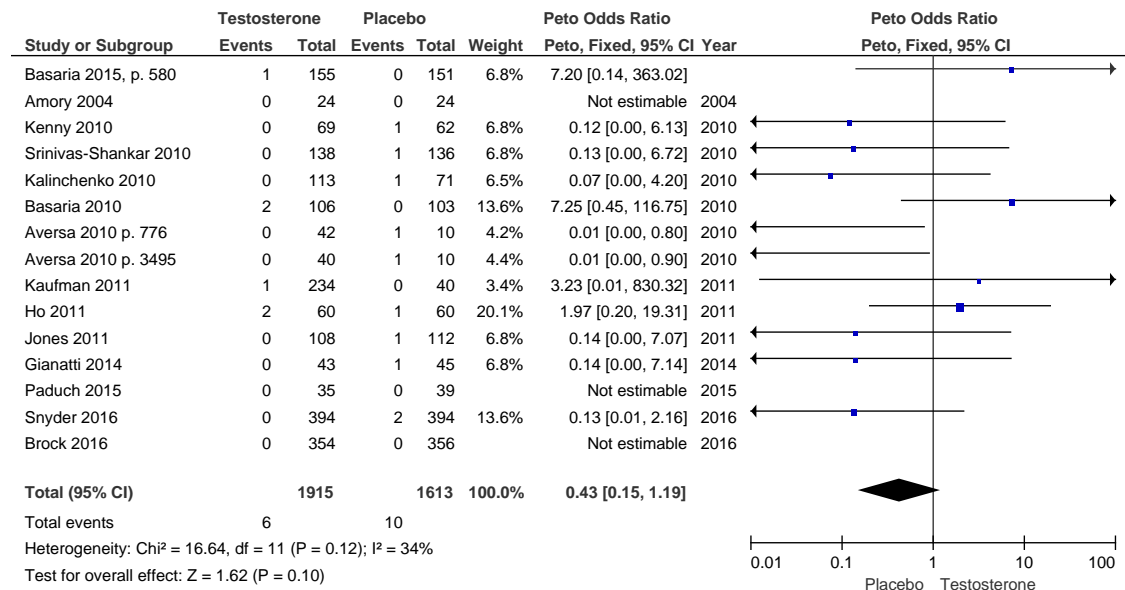

eFigure 7: Odds of prostate cancer associated with the use of any testosterone v. placebo

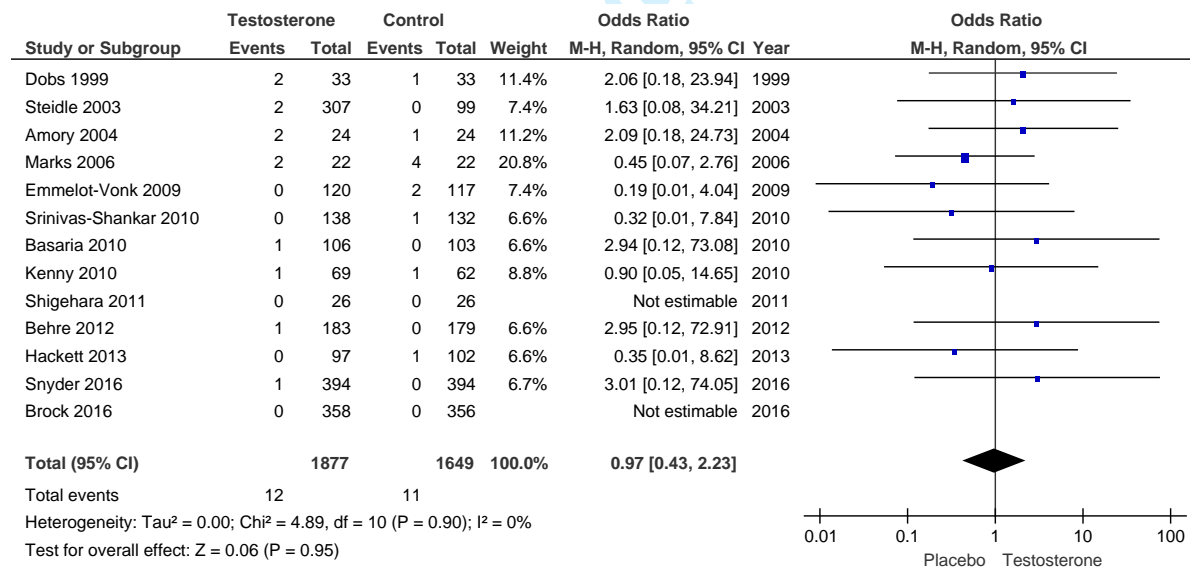

eFigure 8: Odds of serious adverse events: any testosterone v. placebo

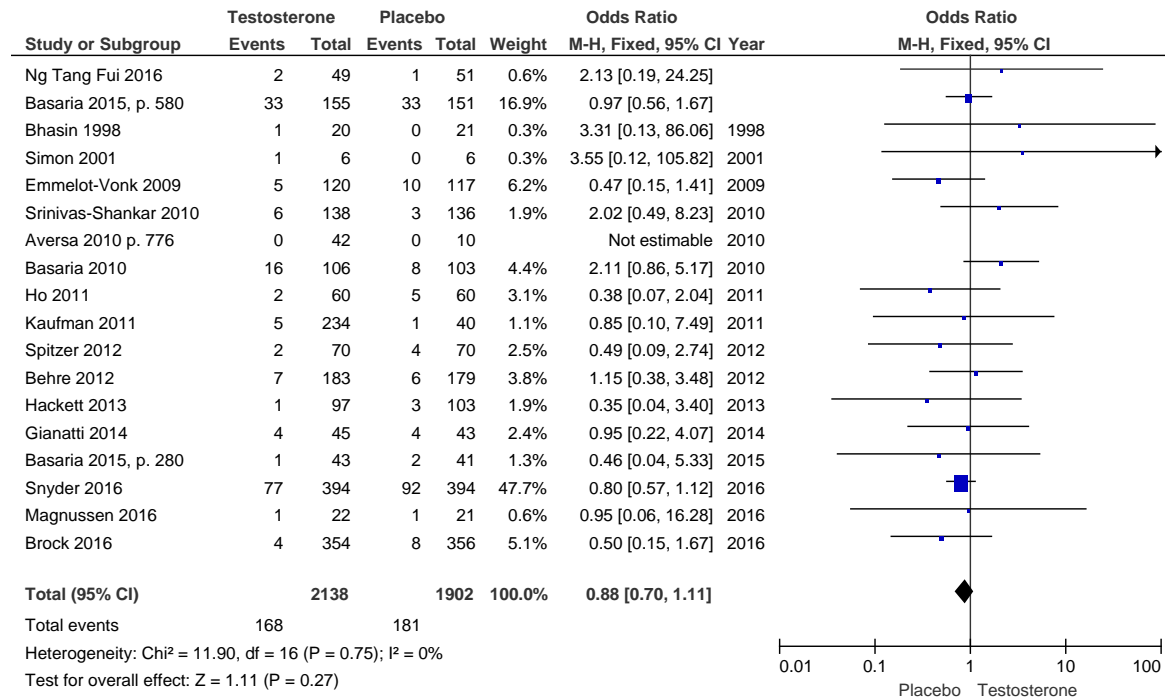

eTable 11: Odds of serious adverse events associated with individual testosterone products – Bayesian network meta-analysis

|                             | Odds ratio (95% credible interval)* |                      |                      |                      |                      |                      |                      |                      |
|-----------------------------|-------------------------------------|----------------------|----------------------|----------------------|----------------------|----------------------|----------------------|----------------------|
|                             | Placebo                             | Gel 1%, 50 mg/d      | Gel 1%, 75 mg/d      | Gel 1%, 100 mg/d     | Gel 1.62%, 40.5 mg/d | Solution 2%, 60 mg/d | Oral TU, 160 mg/d    | IM TU, 1000 mg/12 wk |
| <b>Gel 1%, 50 mg/d</b>      | 0.91<br>(0.46,2.10)                 | —                    |                      |                      |                      |                      |                      |                      |
| <b>Gel 1%, 75 mg/d</b>      | 0.98<br>(0.25,3.55)                 | 1.08<br>(0.21,4.42)  | —                    |                      |                      |                      |                      |                      |
| <b>Gel 1%, 100 mg/d</b>     | 1.41<br>(0.39,4.06)                 | 1.54<br>(0.31,5.25)  | 1.45<br>(0.23,7.53)  | —                    |                      |                      |                      |                      |
| <b>Gel 1.62%, 40.5 mg/d</b> | 1.19<br>(0.11,40.82)                | 1.30<br>(0.10,48.76) | 1.24<br>(0.09,51.17) | 0.89<br>(0.07,35.34) | —                    |                      |                      |                      |
| <b>Solution 2%, 60mg/d</b>  | 0.47<br>(0.08,2.53)                 | 0.51<br>(0.07,3.07)  | 0.48<br>(0.06,4.08)  | 0.34<br>(0.04,2.88)  | 0.38<br>(0.01,7.32)  | —                    |                      |                      |
| <b>Oral TU 160 mg/d</b>     | 0.45<br>(0.08,2.17)                 | 0.49<br>(0.07,2.67)  | 0.46<br>(0.05,3.60)  | 0.32<br>(0.05,2.51)  | 0.36<br>(0.01,6.21)  | 0.94<br>(0.09,10.03) | —                    |                      |
| <b>IM TU,1000 mg/12 wk</b>  | 0.68<br>(0.23,1.94)                 | 0.74<br>(0.18,2.56)  | 0.69<br>(0.13,3.70)  | 0.48<br>(0.11,2.55)  | 0.56<br>(0.01,7.68)  | 1.43<br>(0.20,11.31) | 1.50<br>(0.23,10.76) | —                    |

Note: IM = intramuscular injection, TU = testosterone undecanoate.

\*Random effects model. Significant changes are indicated by use of bold and colour (green indicates that the row treatment treatment is significantly better than the column treatment, while red indicates that the row treatment is significantly worse than the column treatment). White indicates no significant difference between treatments. An additional 4 RCTs (Aversa 2010; Schubert 2004; Bhasin 1998; Simon 2001) could not be included in the network because they reported zero events in ≥ treatment groups.

**eFigure 9: Odds of stroke associated with the use of any testosterone v. placebo**

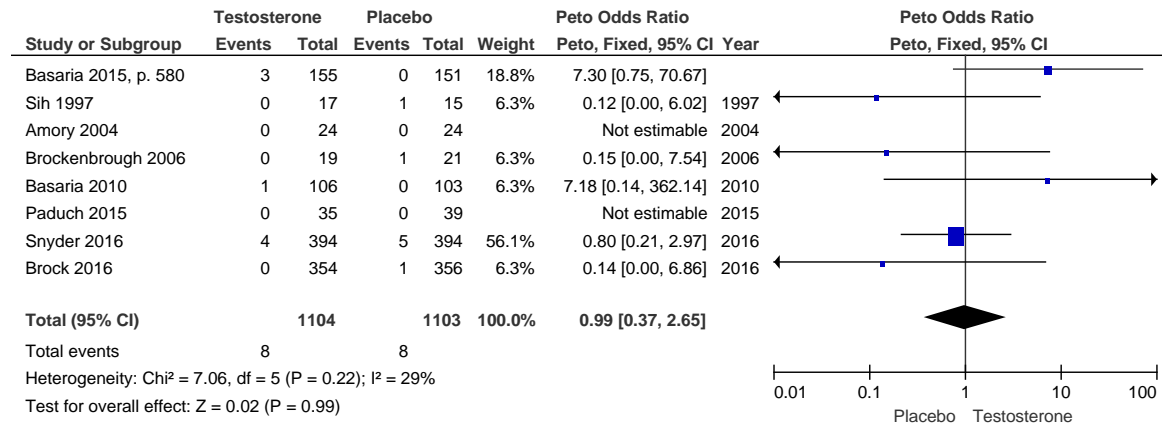

**eFigure 10: Odds of heart disease associated with the use of any testosterone v. placebo**

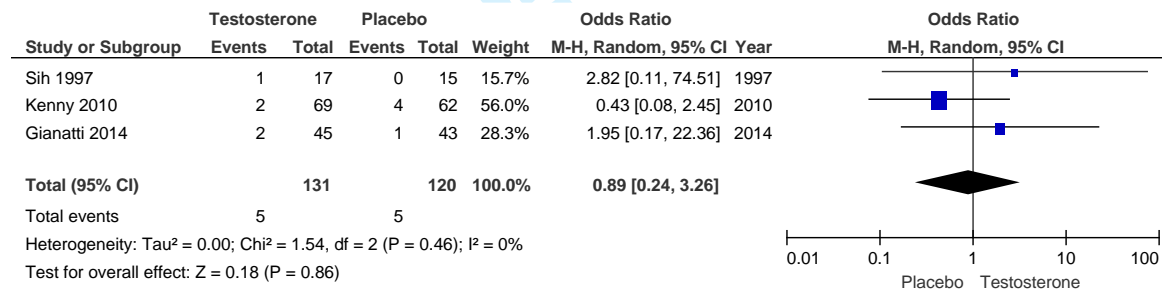

**eFigure 11: Odds of erythrocytosis associated with the use of any testosterone v. placebo**

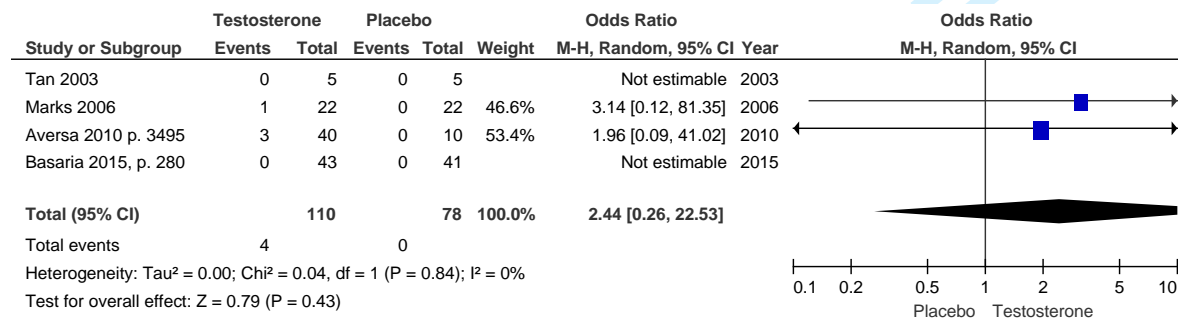

**eFigure 12: Odds of withdrawals due to adverse events associated with the use of any testosterone v. placebo**

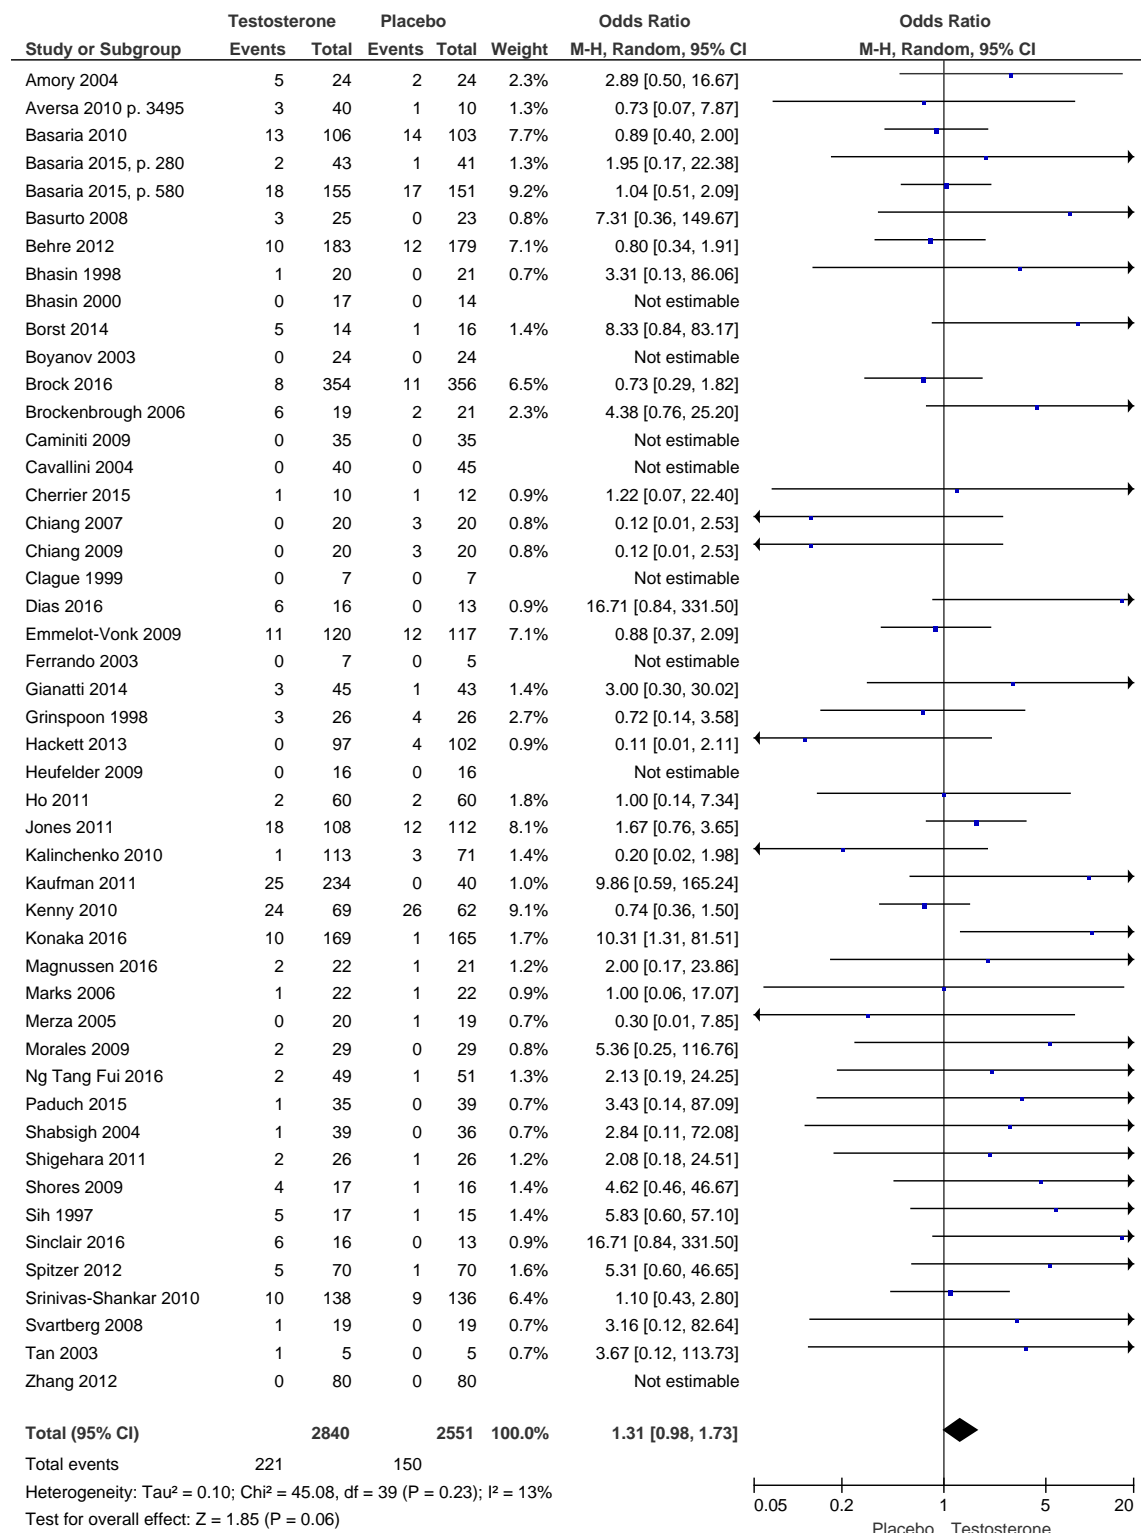

**eTable 12: Odds of withdrawals due to adverse events associated with individual testosterone products – Bayesian network meta-analysis**

|                      | Odds ratio (95% credible interval)* |                    |                      |                    |                    |                     |                    |                      |                     |                      |                      |                  |                    |                    |                    |                    |                    |
|----------------------|-------------------------------------|--------------------|----------------------|--------------------|--------------------|---------------------|--------------------|----------------------|---------------------|----------------------|----------------------|------------------|--------------------|--------------------|--------------------|--------------------|--------------------|
|                      | Placebo                             | Patch, 5 mg/d      | Gel 1%, 5 mg/d       | Gel 1%, 50 mg/d    | Gel 1%, 75 mg/d    | Gel 1%, 100 mg/d    | Gel 2%, 60 mg/d    | Solution 2%, 60 mg/d | Oral TU 160 mg/d    | IM TU, 1000 mg/10 wk | IM TU, 1000 mg/12 wk | IM TE, 125 mg/wk | IM TE, 150 mg/2 wk | IM TE, 200 mg/2 wk | IM TE, 250 mg/4 wk | IM TE, 300 mg/3 wk | IM TC, 200 mg/2 wk |
| Patch, 5 mg/d        | 6.82 (1.66, 32.14)                  | —                  |                      |                    |                    |                     |                    |                      |                     |                      |                      |                  |                    |                    |                    |                    |                    |
| Gel 1%, 5 mg/d       | 0.76 (0.27, 2.14)                   | 0.11 (0.02, 0.63)  | —                    |                    |                    |                     |                    |                      |                     |                      |                      |                  |                    |                    |                    |                    |                    |
| Gel 1%, 50 mg/d      | 1.45 (0.77, 3.00)                   | 0.21 (0.05, 0.86)  | 1.91 (0.59, 6.89)    | —                  |                    |                     |                    |                      |                     |                      |                      |                  |                    |                    |                    |                    |                    |
| Gel 1%, 75 mg/d      | 1.30 (0.55, 3.57)                   | 0.19 (0.03, 1.07)  | 1.71 (0.46, 7.48)    | 0.90 (0.29, 2.85)  | —                  |                     |                    |                      |                     |                      |                      |                  |                    |                    |                    |                    |                    |
| Gel 1%, 100 mg/d     | 1.03 (0.45, 2.40)                   | 0.15 (0.03, 0.64)  | 1.36 (0.37, 5.19)    | 0.71 (0.25, 1.90)  | 0.79 (0.22, 2.61)  | —                   |                    |                      |                     |                      |                      |                  |                    |                    |                    |                    |                    |
| Solution 2%, 60 mg/d | 1.64 (0.57, 4.95)                   | 0.24 (0.04, 1.42)  | 2.18 (0.50, 9.67)    | 1.14 (0.30, 3.98)  | 1.26 (0.28, 4.94)  | 1.60 (0.40, 6.12)   | —                  |                      |                     |                      |                      |                  |                    |                    |                    |                    |                    |
| Gel 2%, 60 mg/d      | 0.73 (0.21, 2.37)                   | 0.11 (0.01, 0.67)  | 0.96 (0.19, 4.68)    | 0.50 (0.12, 1.88)  | 0.56 (0.11, 2.35)  | 0.70 (0.16, 2.93)   | 0.44 (0.08, 2.23)  | —                    |                     |                      |                      |                  |                    |                    |                    |                    |                    |
| Oral TU 160 mg/d     | 0.87 (0.28, 2.77)                   | 0.13 (0.02, 0.80)  | 1.15 (0.25, 5.43)    | 0.60 (0.15, 2.23)  | 0.67 (0.14, 2.77)  | 0.84 (0.20, 3.54)   | 0.53 (0.11, 2.61)  | 1.20 (0.23, 6.61)    | —                   |                      |                      |                  |                    |                    |                    |                    |                    |
| IM TU, 1000 mg/10 wk | 2.14 (0.18, 33.83)                  | 0.31 (0.02, 7.21)  | 2.85 (0.20, 53.28)   | 1.48 (0.11, 24.89) | 1.64 (0.12, 28.93) | 2.08 (0.16, 37.59)  | 1.29 (0.09, 25.16) | 2.95 (0.20, 59.09)   | 2.47 (0.17, 49.97)  | —                    |                      |                  |                    |                    |                    |                    |                    |
| IM TU, 1000 mg/12 wk | 0.52 (0.21, 1.26)                   | 0.08 (0.01, 0.40)  | 0.69 (0.17, 2.72)    | 0.36 (0.11, 1.05)  | 0.40 (0.10, 1.36)  | 0.50 (0.15, 1.68)   | 0.31 (0.08, 1.28)  | 0.72 (0.16, 3.21)    | 0.59 (0.14, 2.52)   | 0.24 (0.01, 3.42)    | —                    |                  |                    |                    |                    |                    |                    |
| IM TE, 125 mg/wk     | 7.95 (0.97, 105.20)                 | 1.20 (0.09, 22.88) | 10.65 (1.03, 166.10) | 5.47 (0.60, 77.02) | 6.08 (0.60, 90.45) | 7.72 (0.80, 115.20) | 4.89 (0.44, 78.95) | 11.35 (1.01, 179.70) | 9.32 (0.83, 152.60) | 3.88 (0.11, 140.30)  | 15.62 (1.59, 244.70) | —                |                    |                    |                    |                    |                    |

Supplemental Online Content: Elliott et al. Testosterone therapy in hypogonadal men: a systematic review and network meta-analysis.

For peer review only - <http://bmjopen.bmj.com/site/about/guidelines.xhtml>

|                           |                          |                                              |                                               |                          |                          |                                               |                          |                                               |                                               |                          |                                                 |                          |                           |                          |                          |                           |   |
|---------------------------|--------------------------|----------------------------------------------|-----------------------------------------------|--------------------------|--------------------------|-----------------------------------------------|--------------------------|-----------------------------------------------|-----------------------------------------------|--------------------------|-------------------------------------------------|--------------------------|---------------------------|--------------------------|--------------------------|---------------------------|---|
| IM TE,<br>150 mg/<br>2 wk | 1.01<br>(0.04,<br>22.84) | 0.15<br>(0.00,<br>4.20)                      | 1.34<br>(0.05,<br>34.59)                      | 0.70<br>(0.03,<br>16.50) | 0.77<br>(0.03,<br>18.63) | 0.97<br>(0.04,<br>24.53)                      | 0.62<br>(0.02,<br>17.03) | 1.39<br>(0.05,<br>39.21)                      | 1.16<br>(0.05,<br>33.97)                      | 0.46<br>(0.01,<br>25.13) | 1.95<br>(0.08,<br>49.97)                        | 0.12<br>(0.00,<br>4.99)  | —                         |                          |                          |                           |   |
| IM TE,<br>200 mg/<br>2 wk | 2.83<br>(0.49,<br>21.73) | 0.42<br>(0.04,<br>4.94)                      | 3.78<br>(0.49,<br>36.13)                      | 1.96<br>(0.29,<br>16.21) | 2.17<br>(0.28,<br>19.79) | 2.73<br>(0.39,<br>24.40)                      | 1.73<br>(0.22,<br>17.02) | 3.93<br>(0.48,<br>41.61)                      | 3.26<br>(0.40,<br>32.63)                      | 1.38<br>(0.05,<br>28.67) | 5.50<br>(0.74,<br>50.37)                        | 0.35<br>(0.02,<br>6.55)  | 2.92<br>(0.08,<br>107.60) | —                        |                          |                           |   |
| IM TE,<br>250 mg/<br>4 wk | 5.92<br>(1.43,<br>36.28) | 0.89<br>(0.10,<br>8.37)                      | <b>8.05</b><br><b>(1.33,</b><br><b>61.53)</b> | 4.12<br>(0.82,<br>27.64) | 4.61<br>(0.77,<br>32.91) | <b>5.81</b><br><b>(1.08,</b><br><b>41.07)</b> | 3.66<br>(0.59,<br>29.86) | <b>8.31</b><br><b>(1.27,</b><br><b>72.32)</b> | <b>6.95</b><br><b>(1.08,</b><br><b>57.31)</b> | 2.88<br>(0.11,<br>57.41) | 11.75<br>(2.13,<br>84.99)                       | 0.75<br>(0.04,<br>11.64) | 6.10<br>(0.20,<br>202.50) | 2.15<br>(0.18,<br>25.19) | —                        |                           |   |
| IM TE,<br>300 mg/<br>3 wk | 0.72<br>(0.11,<br>4.20)  | <b>0.10</b><br><b>(0.01,</b><br><b>0.99)</b> | 0.93<br>(0.11,<br>7.44)                       | 0.49<br>(0.06,<br>3.19)  | 0.54<br>(0.07,<br>3.89)  | 0.69<br>(0.09,<br>4.94)                       | 0.43<br>(0.05,<br>3.45)  | 0.98<br>(0.10,<br>8.51)                       | 0.82<br>(0.09,<br>7.04)                       | 0.33<br>(0.01,<br>6.96)  | 1.38<br>(0.18,<br>10.17)                        | 0.09<br>(0.00,<br>1.40)  | 0.71<br>(0.02,<br>23.91)  | 0.24<br>(0.02,<br>2.99)  | 0.12<br>(0.01,<br>1.18)  | —                         |   |
| IM TC,<br>200 mg/<br>2 wk | 5.77<br>(0.72,<br>76.47) | 0.85<br>(0.06,<br>15.32)                     | 7.73<br>(0.72,<br>116.20)                     | 3.98<br>(0.43,<br>54.25) | 4.37<br>(0.43,<br>64.41) | 5.53<br>(0.60,<br>78.93)                      | 3.52<br>(0.33,<br>54.96) | 8.03<br>(0.71,<br>131.40)                     | 6.60<br>(0.62,<br>104.30)                     | 2.73<br>(0.09,<br>84.03) | <b>11.06</b><br><b>(1.15,</b><br><b>170.30)</b> | 0.72<br>(0.03,<br>19.57) | 5.92<br>(0.14,<br>282.40) | 2.07<br>(0.10,<br>43.57) | 0.95<br>(0.06,<br>17.27) | 8.60<br>(0.51,<br>180.50) | — |

Note: IM = intramuscular injection, TC = testosterone cypionate, TE = testosterone enanthate, TU = testosterone undecanoate.

\*Random-effects model. Significant changes are indicated by use of bold and colour (green indicates that the row treatment treatment is significantly better than the column treatment, which red indicates that the row treatment is significantly worse than the column treatment). White indicates no significant difference between treatments. An additional 23 studies (Basurto 2008, Bhasin 1998 (p. 140), Bhasin 1998 (p. 3155), Boyanov 2003, Caminiti 2009, Cavallini 2004, Chiang 2007, Chiang 2009, Clague 1999, Dobs 1999, Ferrando 2003, Hackett 2013, Heufelder 2009, Kaufman 2011, Merza 2005, Morales 2009, Schubert 2004, Shabsigh 2004, Svartberg 2008, Tan 2003, Zhang 2012, Dias 2016, Paduch 2015) were removed from the network meta-analysis because zero events were reported in one or both groups.



eTable 13: Summary of harms outcomes reported in non-randomized studies

| Author, year                | Population                                                      | Treatment (no. in group)                                                                                                                                                                              | Outcome                                                                                                                                                                                                                                                                                | Comments                                                                                                                                                                                            |
|-----------------------------|-----------------------------------------------------------------|-------------------------------------------------------------------------------------------------------------------------------------------------------------------------------------------------------|----------------------------------------------------------------------------------------------------------------------------------------------------------------------------------------------------------------------------------------------------------------------------------------|-----------------------------------------------------------------------------------------------------------------------------------------------------------------------------------------------------|
| <b>Retrospective cohort</b> |                                                                 |                                                                                                                                                                                                       |                                                                                                                                                                                                                                                                                        |                                                                                                                                                                                                     |
| <b>Cheetham 2017</b>        | ≥ 40 yr with documented androgen deficiency                     | <ul style="list-style-type: none"> <li>• Ever TRT (8,808)</li> <li>• Never TRT (35,527)</li> </ul> Mean follow-up: 4.4 years (median 3.4 years, IQR, 1.7-6.5 years)                                   | <ul style="list-style-type: none"> <li>• Stroke: AHR 0.64 (95% CI 0.52, 0.80)</li> <li>• Acute MI: AHR 0.74 (95% CI 0.63, 0.86)</li> <li>• CVD: AHR 0.76 (95% CI 0.61, 0.93)</li> </ul>                                                                                                | Entry into cohort was based on filling a prescription for TRT (patch 13.6%, gel 34.7%, injectable 51.6%).                                                                                           |
| <b>Layton 2015</b>          | New users of TRT                                                | <ul style="list-style-type: none"> <li>• Gel (109,810)</li> <li>• Injection (103,555)</li> <li>• Patch (9,255)</li> </ul> Mean treatment duration between 96 days (patch) and 122 days (injection)    | Injection v. gel <ul style="list-style-type: none"> <li>• MI: AHR 1.64 (95% CI 0.57, 4.69)</li> <li>• Stroke: AHR 1.28 (0.27, 6.02)</li> </ul>                                                                                                                                         | No significant difference in MI or stroke between injection and gel users. No data available for patch v. injection or gel users.                                                                   |
| <b>Pastuszak 2015</b>       | New TRT users or had been off TRT for ≥ 3 or mo                 | <ul style="list-style-type: none"> <li>• Gel (1% 50–100mg/d or 1.62% 20.25–80.1 mg/d) (47)</li> <li>• IM TE or TC, 100–200mg/wk (57)</li> <li>• Pellets (75mg/3–6 mo) (74)</li> </ul> Duration: 36 mo | <ul style="list-style-type: none"> <li>• Erythrocytosis: Gel: 12.8% of patients Injection: T 66.7% Pellets: 35.1%</li> <li>• Prostate cancer: 1 case of prostate cancer diagnosed in pellet group. No new cases of prostate cancer among men with previous prostate cancer.</li> </ul> | Erythrocytosis defined as hematocrit ≥50%; Erythrocytosis occurred significantly earlier in the injection group (10.5±9.1 mo) compared with the gel (14.0±12.6 mo) or pellet (16.4 ±10.7mo) groups. |
| <b>Ramasamy 2015</b>        | ≥ 65 yr and ≥3 hypogonadal symptoms                             | <ul style="list-style-type: none"> <li>• TRT, dose NR (153)</li> <li>• No TRT, dose NR (64)</li> </ul> Duration: Median follow-up 3.8 (TRT) v. 3.4 yr (TRT)                                           | <ul style="list-style-type: none"> <li>• MI: 1 event in TRT group v. 0 in no TRT group</li> <li>• Stroke: 2 events in TRT v. 1 in no TRT group</li> </ul>                                                                                                                              | All events (except 1 death which took place after 6 months of follow-up) occurred after 2 or more years.                                                                                            |
| <b>Vigen 2013</b>           | Men who underwent coronary angiography                          | <ul style="list-style-type: none"> <li>• TRT, dose NR (1223)</li> <li>• No TRT (7486)</li> </ul> Mean follow-up: 840 d                                                                                | <ul style="list-style-type: none"> <li>• Cardiovascular events†: AHR 1.29, 95% CI 1.04 to 1.58</li> </ul>                                                                                                                                                                              | Entry into cohort was based on filling a prescription for TRT (patch, gel, or injectable). Data reported as TRT v. no TRT. Length of follow-up differed by group.                                   |
| <b>Shores 2012</b>          | > 40 yr treated at a VA medical center, inpatient or outpatient | <ul style="list-style-type: none"> <li>• No TRT (633)</li> <li>• TRT (398)</li> </ul> Duration: 20.2 mo                                                                                               | <ul style="list-style-type: none"> <li>• Prostate cancer: No treatment: 13/633 men; TRT: 7/398 men</li> </ul>                                                                                                                                                                          | Data reported as TRT v. no TRT. TRTs included injectable, patch, or gel.                                                                                                                            |
| <b>Rhoden 2006</b>          | Negative prostate biopsy prior to starting TRT                  | <ul style="list-style-type: none"> <li>• IM testosterone, dose and type NR (33)</li> <li>• Gel 1%, dose NR (25)</li> </ul> Duration: 12 mo                                                            | <ul style="list-style-type: none"> <li>• Prostate cancer: 1 case in the IM group</li> </ul>                                                                                                                                                                                            |                                                                                                                                                                                                     |
| <b>Guay 2000</b>            | Men with ED and primary or secondary hypogonadism               | <ul style="list-style-type: none"> <li>• IM TE, 200–300 mg/2–3 wk (25)</li> <li>• Patch, 5 mg/d (16)</li> </ul>                                                                                       | <ul style="list-style-type: none"> <li>• Prostate cancer: 3 cases (NR to which treatment group the patients belonged)</li> </ul>                                                                                                                                                       |                                                                                                                                                                                                     |

Supplemental Online Content: Elliott et al. Testosterone therapy in hypogonadal men: a systematic review and network meta-analysis.

For peer review only - <http://bmjopen.bmj.com/site/about/guidelines.xhtml>

| Duration: 2–3 mo       |                                                                    |                                                                                                                                                                                        |                                                                                                                                                                                                                                                                                          |                                                                                                                                                                        |
|------------------------|--------------------------------------------------------------------|----------------------------------------------------------------------------------------------------------------------------------------------------------------------------------------|------------------------------------------------------------------------------------------------------------------------------------------------------------------------------------------------------------------------------------------------------------------------------------------|------------------------------------------------------------------------------------------------------------------------------------------------------------------------|
| Prospective cohort     |                                                                    |                                                                                                                                                                                        |                                                                                                                                                                                                                                                                                          |                                                                                                                                                                        |
| <b>Debruyne 2017</b>   | ≥18 yr with a diagnosis of hypogonadism                            | <ul style="list-style-type: none"> <li>• TRT, dose NR (750)</li> <li>• No TRT (249)</li> </ul> Duration: 36 mo (23,900 person-mo)                                                      | <ul style="list-style-type: none"> <li>• Prostate cancer: incidence rate ratio 0.52 (95% CI 0.22 to 1.26)</li> </ul>                                                                                                                                                                     | 68% of TRT users received topical gels, 31% injectables, and 2% oral products                                                                                          |
| <b>Traish 2017</b>     | Symptoms of hypogonadism                                           | <ul style="list-style-type: none"> <li>• TU, 1000mg/12wk (360)</li> <li>• No TRT (296)</li> </ul> Median follow-up: 7 yr                                                               | <ul style="list-style-type: none"> <li>• CVD: 0 in TU group v. 19 in no TRT group</li> <li>• Nonfatal MI: 0 in TU group v. 26 in no TRT group</li> <li>• Nonfatal stroke: 0 in TU group v. 30 in no TRT group</li> <li>• Prostate cancer: 7 in TU group v. 12 in no TRT group</li> </ul> | CVD in no TRT group attributed to MI (5), stroke (4), heart failure (7), thromboembolism (2), lung embolism (1), and pneumonia and lung failure (1)                    |
| <b>Yassin 2017</b>     | Treated or untreated hypogonadal men                               | <ul style="list-style-type: none"> <li>• TRT, dose NR (42)</li> <li>• No treatment (162)</li> </ul> Duration: 6 yr                                                                     | <ul style="list-style-type: none"> <li>• Prostate cancer: 7 (16.7%) in TRT group vs. 84 (51.9%) in untreated group</li> </ul>                                                                                                                                                            | Data reported as a positive biopsy for prostate cancer; lower severity of prostate cancer in terms of staging and grading in the TRT group than in the untreated group |
| <b>Jung 2016</b>       | Symptoms of hypogonadism                                           | <ul style="list-style-type: none"> <li>• TU, 1000 mg/3 mo + lifestyle modification (54)</li> <li>• Lifestyle modification (52)</li> </ul> Treatment duration: 8 mo                     | <ul style="list-style-type: none"> <li>• Prostate cancer: 0 in both groups</li> <li>• MI: 0 in both groups</li> <li>• Stroke: 0 in both groups</li> </ul>                                                                                                                                | Prospective, controlled study                                                                                                                                          |
| <b>Francomano 2014</b> | Severely obese men (mean BMI 42) with ≥ 2 symptoms of hypogonadism | <ul style="list-style-type: none"> <li>• DPE (12)</li> <li>• DPE + IM TU, 1000 mg/12 wk (12)</li> </ul> Duration: 54 wk + 24 wk observational period following withdrawal of treatment | <ul style="list-style-type: none"> <li>• WAE: zero in both groups</li> <li>• SAE: zero in both groups</li> </ul>                                                                                                                                                                         |                                                                                                                                                                        |
| <b>Aydogdu 2013</b>    | IHH                                                                | <ul style="list-style-type: none"> <li>• Sustanon, 250 mg/3wk (28)</li> <li>• Gel 1%, 50 mg/d (24)</li> </ul> Duration: 24 wk                                                          | <ul style="list-style-type: none"> <li>• SAE: zero in all groups</li> </ul>                                                                                                                                                                                                              |                                                                                                                                                                        |
| <b>Blick 2013</b>      | HIV/AIDS                                                           | <ul style="list-style-type: none"> <li>• Androgel 1%, gel, 50 mg/d (92)</li> <li>• Testim 1%, gel, 50 mg/d (75)</li> </ul> Duration: 12 mo                                             | <ul style="list-style-type: none"> <li>• Erythrocytosis: zero in both groups</li> <li>• Prostate cancer: zero in both groups</li> <li>• WAE: zero in both groups</li> </ul>                                                                                                              |                                                                                                                                                                        |
| <b>Aversa 2012</b>     | Middle-aged men with LOH and MetS                                  | <ul style="list-style-type: none"> <li>• No treatment (20)</li> <li>• IM TU, 12 wk (40)</li> </ul> Duration: 36 mo                                                                     | <ul style="list-style-type: none"> <li>• MI: 1 in control group</li> <li>• Erythrocytosis: 4 in TU group</li> </ul>                                                                                                                                                                      |                                                                                                                                                                        |
| <b>Wang 2004</b>       | 19–68 yr                                                           | <ul style="list-style-type: none"> <li>• Gel 1%, 50 mg/d (NR)</li> <li>• Gel 1%, 75 mg/d (NR)</li> <li>• Gel 1%, 100 mg/d (NR)</li> </ul> Total: 163 men<br>Duration: 36 mo†           | <ul style="list-style-type: none"> <li>• Prostate cancer: 1 in 75 mg/d group, 2 in 100 mg/d group</li> <li>• Skin reactions: 12 men</li> </ul>                                                                                                                                           |                                                                                                                                                                        |

Supplemental Online Content: Elliott et al. Testosterone therapy in hypogonadal men: a systematic review and network meta-analysis.

For peer review only - <http://bmjopen.bmj.com/site/about/guidelines.xhtml>

|                |             |                                                                                                                |                                                                                                                                                                                                                                                                     |                                                                                  |
|----------------|-------------|----------------------------------------------------------------------------------------------------------------|---------------------------------------------------------------------------------------------------------------------------------------------------------------------------------------------------------------------------------------------------------------------|----------------------------------------------------------------------------------|
| Hajjar<br>1997 | Elderly men | <ul style="list-style-type: none"> <li>• No treatment (27)</li> <li>• IM TE or TC 200mg/2-3 wk (45)</li> </ul> | <ul style="list-style-type: none"> <li>• Myocardial infarction: 1 in TRT group</li> <li>• Stroke: No treatment: 1/23; TRT: 1/26</li> <li>• Diabetes: No treatment: 0/23; TRT: 1/26</li> <li>• Erythrocytosis<sup>¶</sup>: No treatment: 0/27; TRT: 11/45</li> </ul> | Safety outcomes were reported based on a subset of people assigned to each group |
|                |             | Duration: at least 2 yr                                                                                        |                                                                                                                                                                                                                                                                     |                                                                                  |

Note: AHR = adjusted hazard ratio, DPE = diet plus exercise, ED = erectile dysfunction, IHH = idiopathic hypogonadotropic hypogonadism, IM = intramuscular injection, LOH = late-onset hypogonadism, MetS = metabolic syndrome, MI = myocardial infarction, NR = not reported, SAE = serious adverse event, TC = testosterone cypionate, TE = testosterone enanthate, TU = testosterone undecanoate, TRT = testosterone replacement therapy, T = testosterone, VA = Veterans Affairs, WAE = withdrawal due to adverse events.

†Composite outcome of all-cause mortality, myocardial infarction, and ischemic stroke. MI, stroke and CV death were also reported separately; however the length of observation time differed between groups.

‡ This study was completed after an initial 6-month randomized study for an additional 36 months; participants had a total of 42 months of gel exposure.

¶Reported as polycythemia for the treatment group. Zero count inferred for the control group.

PRISMA NMA Checklist of Items to Include When Reporting A Systematic Review Involving a Network Meta-analysis

| Section/Topic             | Item # | Checklist Item                                                                                                                                                                                                                                                                                                                                                                                                                                                                                                                                                                                                                                                                                                                                                                          | Reported on Page # |
|---------------------------|--------|-----------------------------------------------------------------------------------------------------------------------------------------------------------------------------------------------------------------------------------------------------------------------------------------------------------------------------------------------------------------------------------------------------------------------------------------------------------------------------------------------------------------------------------------------------------------------------------------------------------------------------------------------------------------------------------------------------------------------------------------------------------------------------------------|--------------------|
| <b>TITLE</b>              |        |                                                                                                                                                                                                                                                                                                                                                                                                                                                                                                                                                                                                                                                                                                                                                                                         |                    |
| Title                     | 1      | Identify the report as a systematic review <i>incorporating a network meta-analysis (or related form of meta-analysis)</i> .                                                                                                                                                                                                                                                                                                                                                                                                                                                                                                                                                                                                                                                            | p. 1               |
| <b>ABSTRACT</b>           |        |                                                                                                                                                                                                                                                                                                                                                                                                                                                                                                                                                                                                                                                                                                                                                                                         |                    |
| Structured summary        | 2      | Provide a structured summary including, as applicable:<br><b>Background:</b> main objectives<br><b>Methods:</b> data sources; study eligibility criteria, participants, and interventions; study appraisal; and <i>synthesis methods, such as network meta-analysis</i> .<br><b>Results:</b> number of studies and participants identified; summary estimates with corresponding confidence/credible intervals; <i>treatment rankings may also be discussed. Authors may choose to summarize pairwise comparisons against a chosen treatment included in their analyses for brevity.</i><br><b>Discussion/Conclusions:</b> limitations; conclusions and implications of findings.<br><b>Other:</b> primary source of funding; systematic review registration number with registry name. | p. 3               |
| <b>INTRODUCTION</b>       |        |                                                                                                                                                                                                                                                                                                                                                                                                                                                                                                                                                                                                                                                                                                                                                                                         |                    |
| Rationale                 | 3      | Describe the rationale for the review in the context of what is already known, <i>including mention of why a network meta-analysis has been conducted.</i>                                                                                                                                                                                                                                                                                                                                                                                                                                                                                                                                                                                                                              | p. 6               |
| Objectives                | 4      | Provide an explicit statement of questions being addressed, with reference to participants, interventions, comparisons, outcomes, and study design (PICOS).                                                                                                                                                                                                                                                                                                                                                                                                                                                                                                                                                                                                                             | p. 6               |
| <b>METHODS</b>            |        |                                                                                                                                                                                                                                                                                                                                                                                                                                                                                                                                                                                                                                                                                                                                                                                         |                    |
| Protocol and registration | 5      | Indicate whether a review protocol exists and if and where it can be accessed (e.g., Web address); and, if available, provide registration information, including registration number.                                                                                                                                                                                                                                                                                                                                                                                                                                                                                                                                                                                                  | p. 2,5,6           |
| Eligibility criteria      | 6      | Specify study characteristics (e.g., PICOS, length of follow-up) and report characteristics (e.g., years considered, language, publication status) used as criteria for eligibility, giving rationale. <i>Clearly describe eligible treatments included in the treatment network, and note whether any have been clustered or merged into the same node (with justification).</i>                                                                                                                                                                                                                                                                                                                                                                                                       | p. 6-7             |
| Information sources       | 7      | Describe all information sources (e.g., databases with dates of coverage, contact with study authors to identify                                                                                                                                                                                                                                                                                                                                                                                                                                                                                                                                                                                                                                                                        | p. 7               |

Elliott et al: Testosterone therapy in hypogonadal men:  
a systematic review and network meta-analysis

For peer review only - <http://bmjopen.bmj.com/site/about/guidelines.xhtml>

|                                        |           |                                                                                                                                                                                                                                                                                                                                                                                                                        |                   |
|----------------------------------------|-----------|------------------------------------------------------------------------------------------------------------------------------------------------------------------------------------------------------------------------------------------------------------------------------------------------------------------------------------------------------------------------------------------------------------------------|-------------------|
|                                        |           | additional studies) in the search and date last searched.                                                                                                                                                                                                                                                                                                                                                              |                   |
| Search                                 | 8         | Present full electronic search strategy for at least one database, including any limits used, such that it could be repeated.                                                                                                                                                                                                                                                                                          | Online supplement |
| Study selection                        | 9         | State the process for selecting studies (i.e., screening, eligibility, included in systematic review, and, if applicable, included in the meta-analysis).                                                                                                                                                                                                                                                              | p. 7              |
| Data collection process                | 10        | Describe method of data extraction from reports (e.g., piloted forms, independently, in duplicate) and any processes for obtaining and confirming data from investigators.                                                                                                                                                                                                                                             | p. 7              |
| Data items                             | 11        | List and define all variables for which data were sought (e.g., PICOS, funding sources) and any assumptions and simplifications made.                                                                                                                                                                                                                                                                                  | p. 8              |
| <b>Geometry of the network</b>         | <b>S1</b> | Describe methods used to explore the geometry of the treatment network under study and potential biases related to it. This should include how the evidence base has been graphically summarized for presentation, and what characteristics were compiled and used to describe the evidence base to readers.                                                                                                           | p. 8-9            |
| Risk of bias within individual studies | 12        | Describe methods used for assessing risk of bias of individual studies (including specification of whether this was done at the study or outcome level), and how this information is to be used in any data synthesis.                                                                                                                                                                                                 | p. 7-8            |
| Summary measures                       | 13        | State the principal summary measures (e.g., risk ratio, difference in means). <i>Also describe the use of additional summary measures assessed, such as treatment rankings and surface under the cumulative ranking curve (SUCRA) values, as well as modified approaches used to present summary findings from meta-analyses.</i>                                                                                      | p. 8-9            |
| Planned methods of analysis            | 14        | Describe the methods of handling data and combining results of studies for each network meta-analysis. This should include, but not be limited to: <ul style="list-style-type: none"> <li>• <i>Handling of multi-arm trials;</i></li> <li>• <i>Selection of variance structure;</i></li> <li>• <i>Selection of prior distributions in Bayesian analyses; and</i></li> <li>• <i>Assessment of model fit.</i></li> </ul> | p. 8-9            |
| <b>Assessment of Inconsistency</b>     | <b>S2</b> | Describe the statistical methods used to evaluate the agreement of direct and indirect evidence in the treatment network(s) studied. Describe efforts taken to address its presence when found.                                                                                                                                                                                                                        | p. 8-9            |
| Risk of bias across studies            | 15        | Specify any assessment of risk of bias that may affect the cumulative evidence (e.g., publication bias, selective reporting within studies).                                                                                                                                                                                                                                                                           | p. 7-8            |
| Additional analyses                    | 16        | Describe methods of additional analyses if done, indicating which were pre-specified. This may include, but not be limited to, the following: <ul style="list-style-type: none"> <li>• Sensitivity or subgroup analyses;</li> <li>• Meta-regression analyses;</li> </ul>                                                                                                                                               | NA                |

- *Alternative formulations of the treatment network; and*
- *Use of alternative prior distributions for Bayesian analyses (if applicable).*

## RESULTS†

|                                          |    |                                                                                                                                                                                                                                                                                                                                                                                                                                                              |                                        |
|------------------------------------------|----|--------------------------------------------------------------------------------------------------------------------------------------------------------------------------------------------------------------------------------------------------------------------------------------------------------------------------------------------------------------------------------------------------------------------------------------------------------------|----------------------------------------|
| Study selection                          | 17 | Give numbers of studies screened, assessed for eligibility, and included in the review, with reasons for exclusions at each stage, ideally with a flow diagram.                                                                                                                                                                                                                                                                                              | p. 10, Figure 1                        |
| <b>Presentation of network structure</b> | S3 | Provide a network graph of the included studies to enable visualization of the geometry of the treatment network.                                                                                                                                                                                                                                                                                                                                            | <b>Fig 3, supplement</b>               |
| <b>Summary of network geometry</b>       | S4 | Provide a brief overview of characteristics of the treatment network. This may include commentary on the abundance of trials and randomized patients for the different interventions and pairwise comparisons in the network, gaps of evidence in the treatment network, and potential biases reflected by the network structure.                                                                                                                            | <b>Supplement (eAppendix 4)</b>        |
| Study characteristics                    | 18 | For each study, present characteristics for which data were extracted (e.g., study size, PICOS, follow-up period) and provide the citations.                                                                                                                                                                                                                                                                                                                 | <b>Supplement (eTable 1,2)</b>         |
| Risk of bias within studies              | 19 | Present data on risk of bias of each study and, if available, any outcome level assessment.                                                                                                                                                                                                                                                                                                                                                                  | <b>Supplement (eTable 3,4)</b>         |
| Results of individual studies            | 20 | For all outcomes considered (benefits or harms), present, for each study: 1) simple summary data for each intervention group, and 2) effect estimates and confidence intervals. <i>Modified approaches may be needed to deal with information from larger networks.</i>                                                                                                                                                                                      | <b>Supplement</b>                      |
| Synthesis of results                     | 21 | Present results of each meta-analysis done, including confidence/credible intervals. <i>In larger networks, authors may focus on comparisons versus a particular comparator (e.g. placebo or standard care), with full findings presented in an appendix. League tables and forest plots may be considered to summarize pairwise comparisons. If additional summary measures were explored (such as treatment rankings), these should also be presented.</i> | <b>p. 9-13, supplement</b>             |
| <b>Exploration for inconsistency</b>     | S5 | Describe results from investigations of inconsistency. This may include such information as measures of model fit to compare consistency and inconsistency models, <i>P</i> values from statistical tests, or summary of inconsistency estimates from different parts of the treatment network.                                                                                                                                                              | <b>p. 10, supplement (eAppendix 5)</b> |
| Risk of bias across studies              | 22 | Present results of any assessment of risk of bias across studies for the evidence base being studied.                                                                                                                                                                                                                                                                                                                                                        | <b>p. 9, Supplement (eTable 3,4)</b>   |
| Results of additional analyses           | 23 | Give results of additional analyses, if done (e.g., sensitivity or subgroup analyses, meta-regression analyses, <i>alternative network geometries studied, alternative choice of prior distributions for Bayesian analyses, and so forth</i> ).                                                                                                                                                                                                              | NA                                     |

Elliott et al: Testosterone therapy in hypogonadal men:

a systematic review and network meta-analysis

For peer review only - <http://bmjopen.bmj.com/site/about/guidelines.xhtml>

|                     |    |                                                                                                                                                                                                                                                                                                                                                                                                                                |          |
|---------------------|----|--------------------------------------------------------------------------------------------------------------------------------------------------------------------------------------------------------------------------------------------------------------------------------------------------------------------------------------------------------------------------------------------------------------------------------|----------|
| <b>DISCUSSION</b>   |    |                                                                                                                                                                                                                                                                                                                                                                                                                                |          |
| Summary of evidence | 24 | Summarize the main findings, including the strength of evidence for each main outcome; consider their relevance to key groups (e.g., healthcare providers, users, and policy-makers).                                                                                                                                                                                                                                          | p. 13    |
| Limitations         | 25 | Discuss limitations at study and outcome level (e.g., risk of bias), and at review level (e.g., incomplete retrieval of identified research, reporting bias). <i>Comment on the validity of the assumptions, such as transitivity and consistency. Comment on any concerns regarding network geometry (e.g., avoidance of certain comparisons).</i>                                                                            | p. 15    |
| Conclusions         | 26 | Provide a general interpretation of the results in the context of other evidence, and implications for future research.                                                                                                                                                                                                                                                                                                        | p. 15-16 |
| <b>FUNDING</b>      |    |                                                                                                                                                                                                                                                                                                                                                                                                                                |          |
| Funding             | 27 | Describe sources of funding for the systematic review and other support (e.g., supply of data); role of funders for the systematic review. This should also include information regarding whether funding has been received from manufacturers of treatments in the network and/or whether some of the authors are content experts with professional conflicts of interest that could affect use of treatments in the network. | p. 2     |
