# Supplementary material for: Testosterone therapy in hypogonadal men: a systematic review and network meta-analysis
Source: PubMed Central journal article supplement — BMJ Open. 2017 Nov 16;7(11):e015284. doi: 10.1136/bmjopen-2016-015284 (PMC5701987; doi:10.1136/bmjopen-2016-015284), 2017-11-16
Supplement: bmjopen-2016-015284supp001.pdf [file bmjopen-2016-015284supp001.pdf]

## Supplementary Online Content:

### Elliott et al. Testosterone replacement therapies in hypogonadal men: a systematic review and network meta-analysis

#### Appendix 1: Search strategy

The search was originally executed on June 3, 2014 and updated May 25, 2017.

Testosterone Replacement Therapy  
Primary Studies - Final Strategies  
2014 Jun 3

Database: Embase Classic+Embase <1947 to 2014 June 02>, Ovid MEDLINE(R) In-Process & Other Non-Indexed Citations and Ovid MEDLINE(R) <1946 to Present> Search Strategy:

-----

- 1 exp Testosterone/aa, ad, ae, tu (9143)
- 2 Testosterone Congeners/ad, ae, tu (391)
- 3 exp Testosterone/ and Hormone Replacement Therapy/ (4361)
- 4 exp Androgens/ and Hormone Replacement Therapy/ (5792)
- 5 (testosteron\* adj3 (replac\* or substitut\* or supplement\* or therap\* or treatment\* or buccal or cream\$1 or gel or gels or implant\* or inject\* or oral\* or patch\* or transdermal\*)).tw. (20369)
- 6 (androgen\* adj (replac\* or substitut\* or supplement\* or therap\* or treatment\* or cream\$1 or gel or gels or implant\* or inject\* or patch\*)).tw. (6312)
- 7 (androgen\* adj3 (buccal\* or oral\* or transdermal\*)).tw. (632)
- 8 TRT.tw. (2125)
- 9 (testosterone adj (beta cyclopentylpropionate or cyclopentylpropionate or cipionate or cypionate or enanthate or enanthane or ethanate or heptonate or heptylate or oenanthate or undecanoate or undecylate or "17 undecylate")).tw. (2636)
- 10 ("8-Isotestosterone" or andriol or "andro 100" or "androgyn LA" or androderm or androfort or androgel or androlin or andronaq or andropatch or androsorb or androstenolone or androtardyl or androtest or androtop or andrusol or axiron).tw. (1095)
- 11 ("Bio-T-Gel" or Ciclosterone or "Cristerona T" or "Cristerone T" or CompleoTRT or "CP 601B" or Delatestryl or Depandro or Deposteron or Depostomead or Depo-Testosterone or Depotest or Depovirin or Depoviron or Delatestryl or Duratest or Durathate or Everone or "first-testosterone" or Fortesta or Rortigel or Hexanecarboxylate or Histerone or Homosteron\* or Intrinsa or Jenasteron or LibiGel or Livensa or Malerone or Malogen or Malogex or Mertestate).tw. (492)
- 12 (Nasobol or Nebido or "Neo-Hombreol F" or "Neo-testis" or Neotestis or "NSC 9700" or Ofterone or Oreton or "Oreton-F" or Orquisteron).tw. (292)
- 13 (Pantestone or Perandren or Percutacrine androgenique or Percutacrine androgine or Pertestis or Primotest or Primoteston or Relibra or Restandol or Sterotate or Striant or Sustanon\$1 or "Sustason 250" or Synandrol).tw. (674)
- 14 (Teslen or "Testa-C" or Testamone or Testandron or Testaqua or Testerone or Testex or Testiculosterone or Testim or Testo Enant or Testobase or Testoderm or Testogel or Testoject-50 or Testolin or Testoluton or Testopel or Testopropon or Testosteroid).tw. (691)
- 15 (Testostosterone or Testoviron or Testrin or Testro or Testrone or Theramex or Tostrelle or Testryl or Tostrex or Trans-Testosterone).tw. (604)
- 16 (UNII-3XMK78S470 or Undestor or Virilon or Virormone or Virosterone or Vogelxo).tw. (61)
- 17 or/1-16 (39453)
- 18 exp Animals/ not (exp Animals/ and Humans/) (8702141)
- 19 17 not 18 (25517)
- 20 (controlled clinical trial or randomized controlled trial).pt. (457659)
- 21 clinical trials as topic.sh. (169995)
- 22 (randomi#ed or randomly or RCT\$1 or placebo\*).tw. (1423548)
- 23 ((singl\* or doubl\* or trebl\* or tripl\*) adj (mask\* or blind\* or dumm\*)).tw. (296647)
- 24 trial.ti. (292735)
- 25 or/20-24 (1829141)
- 26 19 and 25 (3594)
- 27 (comment or editorial or interview or letter or news).pt. (2802584)
- 28 26 not 27 (3546)
- 29 (control\* adj2 trial\*).tw. (323672)
- 30 (nonrandom\* or non-random\* or quasi-random\* or quasi-experiment\*).tw. (73609)
- 31 (nRCT or nRCTs or non-RCT\$1).tw. (647)
- 32 (control\* adj3 ("before and after" or "before after")).tw. (6046)
- 33 time series.tw. (33994)
- 34 (pre- adj3 post-).tw. (110642)
- 35 (pretest adj3 posttest).tw. (6260)

36 (control\* adj2 stud\$3).tw. (346641)  
 37 Control Groups/ (74764)  
 38 (control\$ adj2 group\$1).tw. (752277)  
 39 or/29-38 (1509227)  
 40 19 and 39 (2115)  
 41 40 not 27 (2097)  
 42 exp Cohort Studies/ (1517558)  
 43 cohort\$1.tw. (675350)  
 44 Retrospective Studies/ (837256)  
 45 (longitudinal or prospective or retrospective).tw. (1721897)  
 46 ((followup or follow-up) adj (study or studies)).tw. (89267)  
 47 Observational study.pt. (2469)  
 48 (observation\$2 adj (study or studies)).tw. (111012)  
 49 ((population or population-based) adj (study or studies or analys#s)).tw. (26131)  
 50 ((multidimensional or multi-dimensional) adj (study or studies)).tw. (187)  
 51 Comparative Study.pt. (1676994)  
 52 ((comparative or comparison) adj (study or studies)).tw. (185742)  
 53 or/42-52 (4729450)  
 54 19 and 53 (3389)  
 55 54 not 27 (3352)  
 56 28 or 41 or 55 (6587)  
 57 56 use prmz (3219) [ALL MEDLINE RECORDS]  
 58 28 use prmz (1720) [MEDLINE RCTS]  
 59 41 use prmz (845) [MEDLINE NON-RCTS]  
 60 55 use prmz (1837) [MEDLINE OBSERV]  
 61 androgen therapy/ (3539)  
 62 androgen deficiency/dt (507)  
 63 testosterone undecanoate/ (1591)  
 64 testosterone cipionate/ (871)  
 65 testosterone enantate/ (2439)  
 66 (testosteron\* adj3 (replac\* or substitut\* or supplement\* or therap\* or treatment\* or buccal or cream\$1 or gel or gels or implant\* or inject\* or oral\* or patch\* or transdermal\*)).tw. (20369)  
 67 (androgen\* adj (replac\* or substitut\* or supplement\* or therap\* or treatment\* or cream\$1 or gel or gels or implant\* or inject\* or patch\*)).tw. (6312)  
 68 (androgen\* adj3 (buccal\* or oral\* or transdermal\*)).tw. (632)  
 69 TRT.tw. (2125)  
 70 (testosterone adj (beta cyclopentylpropionate or cyclopentylpropionate or cipionate or cypionate or enanthate or enanthane or ethanate or heptonate or heptylate or oenanthate or undecanoate or undecylate or "17 undecylate")).tw. (2636)  
 71 ("8-Isotestosterone" or andriol or "andro 100" or "androgyn LA" or androderm or androfort or androgel or androlin or andronaq or andropatch or androsorb or androstenolone or androtardyl or androtest or androtop or andrusol or axiron).tw. (1095)  
 72 ("Bio-T-Gel" or Ciclosterone or "Cristerona T" or "Cristerone T" or CompleoTRT or "CP 601B" or Delatestryl or Depandro or Deposteron or Depostomead or Depo-Testosterone or Depotest or Depovirin or Depoviron or Delatestryl or Duratest or Durathate or Everone or "first-testosterone" or Fortesta or Rortigel or Hexanecarboxylate or Histerone or Homosteron\* or Intrinsa or Jenasteron or LibiGel or Livensa or Malerone or Malogen or Malogex or Mertestate).tw. (492)  
 73 (Nasobol or Nebido or "Neo-Hombreol F" or "Neo-testis" or Neotestis or "NSC 9700" or Ofterone or Oreton or "Oreton-F" or Orquisteron).tw. (292)  
 74 (Pantestone or Perandren or Percutacrine androgenique or Percutacrine androgine or Pertestis or Primotest or Primoteston or Relibra or Restandol or Sterotate or Striant or Sustanon\$1 or "Sustason 250" or Synandrol).tw. (674)  
 75 (Teslen or "Testa-C" or Testamone or Testandrone or Testaqua or Testeron or Testex or Testiculosterone or Testim or Testo Enant or Testobase or Testoderm or Testogel or Testoject-50 or Testolin or Testoluton or Testopel or Testopropon or Testosteroid).tw. (691)  
 76 (Testostosterone or Testoviron or Testrin or Testro or Testrone or Theramex or Tostrelle or Testryl or Tostrex or Trans-Testosterone).tw. (604)  
 77 (UNII-3XMK78S470 or Undestor or Virilon or Virormone or Viosterone or Vogelxo).tw. (61)  
 78 or/61-77 (33099)  
 79 randomized controlled trial/ or controlled clinical trial/ (936519)  
 80 exp "clinical trial (topic)"/ (104828)  
 81 (randomi#ed or randomly or RCT\$1 or placebo\*).tw. (1423548)  
 82 ((singl\* or doubl\* or trebl\* or tripl\*) adj (mask\* or blind\* or dumm\*)).tw. (296647)  
 83 trial.ti. (292735)  
 84 or/79-83 (1962147)  
 85 78 and 84 (4042)  
 86 exp animal experimentation/ or exp models animal/ or exp animal experiment/ or nonhuman/ or exp vertebrate/ (37422531)  
 87 exp humans/ or exp human experimentation/ or exp human experiment/ (28425359)  
 88 86 not 87 (8998814)  
 89 85 not 88 (3544)  
 90 (letter or editorial).pt. (2492646)  
 91 89 not 90 (3515)

92 (control\* adj2 trial\*).tw. (323672)  
 93 (nonrandom\* or non-random\* or quasi-random\* or quasi-experiment\*).tw. (73609)  
 94 (nRCT or nRCTs or non-RCT\$1).tw. (647)  
 95 (control\* adj3 ("before and after" or "before after")).tw. (6046)  
 96 time series analysis/ (13996)  
 97 time series.tw. (33994)  
 98 pretest posttest control group design/ (202)  
 99 (pre- adj3 post-).tw. (110642)  
 100 (pretest adj3 posttest).tw. (6260)  
 101 controlled study/ (4336835)  
 102 (control\* adj2 stud\$3).tw. (346641)  
 103 control group/ (74764)  
 104 (control\* adj2 group\$1).tw. (752277)  
 105 or/92-104 (5430128)  
 106 78 and 105 (7057)  
 107 106 not 88 (3849)  
 108 107 not 90 (3833)  
 109 cohort analysis/ (334727)  
 110 cohort\$1.tw. (675350)  
 111 retrospective study/ (837256)  
 112 longitudinal study/ (153245)  
 113 prospective study/ (618128)  
 114 (longitudinal or prospective or retrospective).tw. (1721897)  
 115 follow up/ (824941)  
 116 ((followup or follow-up) adj (study or studies)).tw. (89267)  
 117 observational study/ (58475)  
 118 (observation\$2 adj (study or studies)).tw. (111012)  
 119 population research/ (68859)  
 120 ((population or population-based) adj (study or studies or analys#s)).tw. (26131)  
 121 ((multidimensional or multi-dimensional) adj (study or studies)).tw. (187)  
 122 exp comparative study/ (2694962)  
 123 ((comparative or comparison) adj (study or studies)).tw. (185742)  
 124 or/109-123 (5973302)  
 125 78 and 124 (4650)  
 126 125 not 88 (3667)  
 127 126 not 90 (3625)  
 128 91 or 108 or 127 (7409)  
 129 128 use emczd (5052) [ALL EMBASE RECORDS]  
 130 91 use emczd (2221) [EMBASE RCTS]  
 131 108 use emczd (3091) [EMBASE NON-RCTS]  
 132 127 use emczd (2341) [EMBASE OBSERV]  
 133 58 or 130 (3941) [MEDLINE/EMBASE RCTS]  
 134 remove duplicates from 133 (2771) [UNIQUE RCTS]  
 135 134 use prmz (1666) [MEDLINE UNIQUE RCTS]  
 136 134 use emczd (1105) [EMBASE UNIQUE RCTS]  
 137 59 or 131 (3936) [MEDLINE/EMBASE NON-RCTS]  
 138 137 not 133 (1817) [OVERLAP REMOVED]  
 139 remove duplicates from 138 (1633) [UNIQUE NON-RCTS]  
 140 139 use prmz (264) [MEDLINE UNIQUE NON-RCTS]  
 141 139 use emczd (1369) [EMBASE UNIQUE NON-RCTS]  
 142 60 or 132 (4178) [MEDLINE/EMBASE OBSERV]  
 143 142 not (133 or 137) (2513) [OVERLAP REMOVED]  
 144 remove duplicates from 143 (2170) [UNIQUE OBSERV]  
 145 144 use prmz (1216) [MEDLINE UNIQUE OBSERV STUDIES]  
 146 144 use emczd (954) [EMBASE UNIQUE OBSERV STUDIES]  
 147 134 or 139 or 144 (6574) [UNIQUE RECORDS – ALL STUDY TYPES]

## Appendix 2: Scales represented in the analysis of data for each outcome

|                          |                                                                                          |
|--------------------------|------------------------------------------------------------------------------------------|
| <b>Quality of life</b>   | Aging Males' Symptoms                                                                    |
|                          | Minnesota Living with Heart Failure Questionnaire                                        |
|                          | Quality of Life Specific to Male Erection Difficulties                                   |
|                          | International Prostate Symptoms Score Quality of Life                                    |
|                          | Quality of Life Enjoyment and Satisfaction Questionnaire                                 |
|                          | Questions on Life Satisfaction, health subscale                                          |
|                          | Health Related Quality of Life, sexual function domainSF-36 (total score)                |
| <b>Depression</b>        | Hospital Anxiety and Depression Scale                                                    |
|                          | Beck's Depression Inventory                                                              |
|                          | General Well-Being Index, depressed mood dimension                                       |
|                          | Geriatric Depression Scale                                                               |
|                          | Hamilton Depression Scale                                                                |
| <b>Libido</b>            | International Index of Erectile Function (sexual desire domain)                          |
|                          | Men's Sexual Health Questionnaire (sexual desire domain)                                 |
|                          | Partial Androgen Deficiency in Aging Men (PADAM) Questionnaire                           |
|                          | Psychosexual Daily Questionnaire                                                         |
| <b>Erectile function</b> | International Index of Erectile Function (IIEF-5 or erectile function domain of IIEF-15) |

### eAppendix 3: Included studies\*

\*The list of excluded studies is available from the authors on request.

Note: studies were not evaluated for inclusion on the basis reported outcomes.

1. Agarwal PK, Oefelein MG. Testosterone replacement therapy after primary treatment for prostate cancer. *J Urol*. 2005; 173: 533–6.
2. Agledahl I, Brodin E, Svartberg J, et al. Impact of long-term testosterone treatment on plasma levels of free TFPI and TF-induced thrombin generation ex vivo in elderly men with low testosterone levels. *Thrombo Haemostasis*. 2009; 102: 945.
3. Agledahl I, Hansen JB, Svartberg J. Impact of testosterone treatment on postprandial triglyceride metabolism in elderly men with subnormal testosterone levels. *Scand J Clin Lab Invest* 2008; 68: 641.
4. Alamir MA, Ellenberg SS, Swerdloff RS, et al. The Cardiovascular Trial of the Testosterone Trials: Rationale, design, and baseline data of a clinical trial using computed tomographic imaging to assess the progression of coronary atherosclerosis. *Coronary Artery Disease*. 2016;27:95.
5. Amory JK, Watts NB, Easley KA, et al. Exogenous testosterone or testosterone with finasteride increases bone mineral density in older men with low serum testosterone. *J Clin Endocrinol Metab* 2004; 89: 503–10.
6. Andrade ES, Jr., Clapauch R, Buksman S. Short term testosterone replacement therapy improves libido and body composition. *Arq Bras Endocrinol Metabol* 2009;53:996–1004.
7. Arafa M, Zohdy W, Aboulsoud S, et al. Prevalence of late-onset hypogonadism in men with type 2 diabetes mellitus. *Andrologia* 2012; 44: 756.
8. Arver S, Sinha-Hikim I, Beall G, Guerrero M, Shen R, Bhasin S. Serum dihydrotestosterone and testosterone concentrations in human immunodeficiency virus-infected men with and without weight loss. *J Androl* 1999; 20: 611–8.
9. Atkinson RA, Srinivas-Shankar U, Roberts SA, et al. Effects of testosterone on skeletal muscle architecture in intermediate-frail and frail elderly men. *J Gerontol A Biol Sci Med Sci* 2010; 65: 1215.
10. Aversa A, Bruzziches R, Francomano D, et al. Effects of testosterone undecanoate on cardiovascular risk factors and atherosclerosis in middle-aged men with late-onset hypogonadism and metabolic syndrome: results from a 24-month, randomized, double-blind, placebo-controlled study. *J Sex Med* 2010; 7: 3495.
11. Aversa A, Bruzziches R, Francomano D, Spera G, Lenzi A. Efficacy and safety of two different testosterone undecanoate formulations in hypogonadal men with metabolic syndrome. *J Endocrinol Invest* 2010; 33: 776–3.
12. Aversa A, Bruzziches R, Francomano D, et al. Effects of long-acting testosterone undecanoate on bone mineral density in middle-aged men with late-onset hypogonadism and metabolic syndrome: Results from a 36 months controlled study. *Aging Male* 2012; 15: 96.
13. Aydogdu A, Bolu E, Sonmez A, et al. Effects of three different medications on metabolic parameters and testicular volume in patients with hypogonadotropic hypogonadism: 3-year experience. *Clin Endocrinol* 2013; 79: 243–51.
14. Bachman E, Travison TG, Basaria S, et al. Testosterone induces erythrocytosis via increased erythropoietin and suppressed hepcidin: evidence for a new erythropoietin/hemoglobin set point. *J Gerontol A Biol Sci Med Sci* 2014; 69: 725–735.
15. Basaria S, Coviello AD, Travison TG, et al. Adverse events associated with testosterone administration. *N Engl J Med* 2010; 363: 109–22.
16. Basaria S, Davda MN, Travison TG, Ulloor J, Singh R, Bhasin S. Risk factors associated with cardiovascular events during testosterone administration in older men with mobility limitation. *J Gerontol A Biol Sci Med Sci* 2013; 68: 153–160.
17. Basaria S, Harman SM, Travison TG, et al. Effects of Testosterone Administration for 3 Years on Subclinical Atherosclerosis Progression in Older Men With Low or Low-Normal Testosterone Levels: A Randomized Clinical Trial. *JAMA : the journal of the American Medical Association*. 2015;314:570.
18. Basaria S, Travison TG, Alford D, et al. Effects of testosterone replacement in men with opioid-induced androgen deficiency: a randomized controlled trial. *Pain*. 2015;156:280.

19. Basurto L, Zarate A, Gomez R, Vargas C, Saucedo R, Galvan R. Effect of testosterone therapy on lumbar spine and hip mineral density in elderly men. *Aging Male* 2008; 11: 140–5.
20. Beggs LA, Yarrow JF, Conover CF, et al. Testosterone alters iron metabolism and stimulates red blood cell production independently of dihydrotestosterone. *Am J Physiol Endocrinol Metab* 2014; 307: E456–E461.
21. Behre HM, Tammela TL, Arver S., et al. A randomized, double-blind, placebo-controlled trial of testosterone gel on body composition and health-related quality-of-life in men with hypogonadal to low-normal levels of serum testosterone and symptoms of androgen deficiency over 6 months with 12 months open-label follow-up. *Aging Male* 2012; 15: 198.
22. Bhasin S, Storer TW, Asbel-Sethi N, et al. Effects of testosterone replacement with a nongenital, transdermal system, Androderm, in human immunodeficiency virus-infected men with low testosterone levels. *J Clin Endocrinol Metab* 1998; 83: 3155–62.
23. Bhasin S, Storer TW, Javanbakht M, et al. Testosterone replacement and resistance exercise in HIV-infected men with weight loss and low testosterone levels. *JAMA* 2000; 283: 763–70.
24. Black AM, Day AG, Morales A. The reliability of clinical and biochemical assessment in symptomatic late-onset hypogonadism: Can a case be made for a 3-month therapeutic trial? *BJU International* 2004; 94: 1066–70.
25. Blick G. Optimal diagnostic measures and thresholds for hypogonadism in men with HIV/AIDS: comparison between 2 transdermal testosterone replacement therapy gels. *Postgrad.Med* 2013; 125: 30–9.
26. Borst SE, Yarrow JF, Conover CF, et al. Musculoskeletal and prostate effects of combined testosterone and finasteride administration in older hypogonadal men: a randomized, controlled trial. *Am J Physiol Endocrinol Metab* 2014; 306: E433–E442.
27. Borst SE, Yarrow JF, Fernandez C, et al. Cognitive effects of testosterone and finasteride administration in older Hypogonadal men. *Clin Interv Aging*. 2014; 9: 1327–33.
28. Boyanov MA, Boneva Z, Christov VG. Testosterone supplementation in men with type 2 diabetes, visceral obesity and partial androgen deficiency. *Aging Male* 2003; 6: 1–7.
29. Brock G, Heiselman D, Maggi M, Kim SW, Rodr JM. Effect of Testosterone Solution 2% on Testosterone Concentration, Sex Drive and Energy in Hypogonadal Men: Results of a Placebo Controlled Study. *J Urol*. 2016;195:699.
30. Brockenbrough AT, Dittrich MO, Page ST, Smith T, Stivelman JC, Bremner WJ. Transdermal androgen therapy to augment EPO in the treatment of anemia of chronic renal disease. *Am J Kidney Dis* 2006; 47: 251–62.
31. Budoff MJ, Ellenberg SS, Lewis CE, et al. Testosterone Treatment and Coronary Artery Plaque Volume in Older Men With Low Testosterone. *JAMA : the journal of the American Medical Association*. 2017;317:708.
32. Buisson J. Effects of testosterone supplementation on sexual function in elderly men: Results of a six month randomised, placebo controlled study. *Cahiers de l'Annee Gerontologique* 2010; 2: 144–6.
33. Burnett AL, Kan-Dobrosky N, Miller MG. Testosterone replacement with 1% testosterone gel and priapism: no definite risk relationship. *J Sex Med* 2013; 10: 1151–61.
34. Caminiti G, Volterrani M, Iellamo F, et al. Effect of long-acting testosterone treatment on functional exercise capacity, skeletal muscle performance, insulin resistance, and baroreflex sensitivity in elderly patients with chronic heart failure a double-blind, placebo-controlled, randomized study. *J Am College Cardiol* 2009; 54: 919.
35. Cavallini G, Biagiotti G, Giudice C. Association between Peyronie disease and low serum testosterone levels: detection and therapeutic considerations. *J Androl* 2012; 33: 381.
36. Cavallini G, Caracciolo S, Vitali G, Modenini F, Biagiotti G. Carnitine versus androgen administration in the treatment of sexual dysfunction, depressed mood, and fatigue associated with male aging. *Urology* 2004; 63: 641–6.
37. Cheetham TC, An JJ, Jacobsen SJ, et al. Association of testosterone replacement with cardiovascular outcomes among men with androgen deficiency. *JAMA Internal Medicine*. 2017;177:491.
38. Cherrier MM, Anderson K, Shofer J, Millard S, Matsumoto AM. Testosterone treatment of men with mild cognitive impairment and low testosterone levels. *Am J Alzheimers Dis Other Demen*. 2015;30:421.
39. Chiang HS, Cho SL, Lin YC, Hwang TI. Testosterone gel monotherapy improves sexual function of hypogonadal men mainly through restoring erection: evaluation by IIEF score. *Urology* 2009; 73(4): 762-6.
40. Chiang HS, Hwang TI, Hsui YS, et al. Transdermal testosterone gel increases serum testosterone levels in hypogonadal men in Taiwan with improvements in sexual function. *Int J Impot Res* 2007; 19(4): 411–7.

41. Chillar JJ. Testosterone undecanoate improves lipid profile in patients with type 1 diabetes and hypogonadotropic hypogonadism. *Endocrine journal*. 2017;63:849.
42. Clague JE, Wu FC, Horan MA. Difficulties in measuring the effect of testosterone replacement therapy on muscle function in older men. *Int J Androl* 1999; 22(4): 261-265.
43. Cunningham GR, Stephens-Shields AJ, Rosen RC, et al. Association of sex hormones with sexual function, vitality, and physical function of symptomatic older men with low testosterone levels at baseline in the testosterone trials. *Journal of Clinical Endocrinology and Metabolism*. 2015;100:1146.
44. Cunningham GR, Stephens-Shields AJ, Rosen RC, et al. Testosterone treatment and sexual function in older men with low testosterone levels. *Journal of Clinical Endocrinology and Metabolism*. 2016;101:3096.
45. Dean JD, Carnegie C, Rodzvilla J, Smith T. Long-term effects of Testim 1% testosterone gel in hypogonadal men. *Rev Urol* 2005; 7(2): 87–94.
46. Debruynne FMJ, Behre HM, Roehrborn CG, et al. Testosterone treatment is not associated with increased risk of prostate cancer or worsening of lower urinary tract symptoms: prostate health outcomes in the Registry of Hypogonadism in Men. *BJU International*. 2017;119:216.
47. Dhindsa S, Ghanim H, Batra M, et al. Insulin Resistance and Inflammation in Hypogonadotropic Hypogonadism and Their Reduction After Testosterone Replacement in Men With Type 2 Diabetes. *Diabetes Care*. 2016;39:82.
48. Dias JP, Melvin D, Shardell M, et al. Effects of transdermal testosterone gel or an aromatase inhibitor on prostate volume in older men. *Journal of Clinical Endocrinology and Metabolism*. 2016;101:1865.
49. Dias JP, Melvin D, Simonsick EM, et al. Effects of aromatase inhibition vs. testosterone in older men with low testosterone: randomized-controlled trial. *Andrology*. 2016;4:33.
50. Dias JP, Shardell MD, Carlson OD, et al. Testosterone vs. aromatase inhibitor in older men with low testosterone: effects on cardiometabolic parameters. *Andrology*. 2017;5:31.
51. Dias JP, Veldhuis JD, Carlson O, et al. Effects of transdermal testosterone gel or an aromatase inhibitor on serum concentration and pulsatility of growth hormone in older men with age-related low testosterone. *Metabolism*. 2017;69:143-147, 2017 Apr.
52. Dobs AS, Meikle AW, Arver S, Sanders SW, Caramelli KE, Mazer NA. Pharmacokinetics, efficacy, and safety of a permeation-enhanced testosterone transdermal system in comparison with bi-weekly injections of testosterone enanthate for the treatment of hypogonadal men. *J Clin Endocrinol Metab* 1999; 84(10): 3469–78.
53. Drinka PJ, Jochen AL, Cuisinier M, Bloom R, Rudman I, Rudman D. Polycythemia as a complication of testosterone replacement therapy in nursing home men with low testosterone levels. *J Am Geriatr Soc* 1995; 43(8): 899–901.
54. Eisenberg ML, Li S, Herder D, Lamb DJ, Lipshultz LI. Testosterone therapy and mortality risk. *Int J Impot Res* 2014; 27:46–8.
55. Emmelot-Vonk MH, Verhaar HJ, Nakhai Pour HR, et al. Effect of testosterone supplementation on functional mobility, cognition, and other parameters in older men: a randomized controlled trial. *JAMA* 2008; 299(1): 39–52.
56. Emmelot-Vonk MH, Verhaar HJ, Nakhai-Pour HR, Grobbee DE, van der Schouw YT. Effect of testosterone supplementation on sexual functioning in aging men: a 6-month randomized controlled trial. *Int J Impot Res* 2009; 21: 129-38.
57. Fennell C, Sartorius G, Ly LP, et al. Randomized cross-over clinical trial of injectable vs. implantable depot testosterone for maintenance of testosterone replacement therapy in androgen deficient men. *Clin Endocrinol* 2010; 73: 102.
58. Ferrando AA, Sheffield-Moore M, Paddon-Jones D, Wolfe RR, Urban RJ. Differential anabolic effects of testosterone and amino acid feeding in older men. *J Clin Endocrinol Metab* 2003; 88:358–62.
59. Ferrando AA, Sheffield-Moore M, Yeckel CW, et al. Testosterone administration to older men improves muscle function: molecular and physiological mechanisms. *Am J Physiol Endocrinol Metab* 2002; 282: E601–E607.
60. Fitts RH, Peters JR, Dillon EL, Durham WJ, Sheffield-Moore M, Urban RJ. Weekly versus monthly testosterone administration on fast and slow skeletal muscle fibers in older adult males. *Journal of Clinical Endocrinology and Metabolism*. 2015;100:E223.
61. Francomano D, Bruzziches R, Barbaro G, et al. Effects of testosterone undecanoate replacement and withdrawal on cardio-metabolic, hormonal and body composition outcomes in severely obese hypogonadal men: A pilot study. *J Endocrinol Invest* 2014; 37: 401–11.

62. Francomano D, Ilacqua A, Bruzziches R, et al. Effects of 5-year treatment with testosterone undecanoate on lower urinary tract symptoms in obese men with hypogonadism and metabolic syndrome. *Urology* 2014; 83: 167.
63. Francomano D, Lenzi A, Aversa A. Effects of five-year treatment with testosterone undecanoate on metabolic and hormonal parameters in ageing men with metabolic syndrome. *Int J Endocrinol* 2014; 2014: 527470.
64. Fui MNT, Hoermann R, Prendergast LA, Zajac JD, Grossmann M. Symptomatic response to testosterone treatment in dieting obese men with low testosterone levels in a randomized, placebo-controlled clinical trial. *Int J Obes (Lond)*. 2017;41:420.
65. Gagliano-Juca T, Icli TB, Pencina KM, et al. Effects of Testosterone Replacement on Electrocardiographic Parameters in Men: Findings From Two Randomized Trials. *Journal of Clinical Endocrinology and Metabolism*. 2017;102:1478.
66. Gianatti EJ, Dupuis P, Hoermann R, et al. Effect of testosterone treatment on glucose metabolism in men with type 2 diabetes: A randomized controlled trial. *Diabetes Care* 2014; 37: 2098–107.
67. Gianatti EJ, Dupuis P, Hoermann R, Zajac JD, Grossmann M. Effect of testosterone treatment on constitutional and sexual symptoms in men with type 2 diabetes in a randomized, placebo-controlled clinical trial. *J Clin Endocrinol Metab* 2014; 99: 3821–8.
68. Gianatti EJ, Hoermann R, Lam Q, Dupuis P, Zajac JD, Grossmann M. Effect of testosterone treatment on cardiac biomarkers in a randomized controlled trial of men with type 2 diabetes. *Clinical Endocrinology*. 2016;84:55.
69. Giltay EJ, Tishova YA, Mskhalaya GJ, et al. Effects of testosterone supplementation on depressive symptoms and sexual dysfunction in hypogonadal men with the metabolic syndrome. *J Sex Med* 2010; 7: 2572.
70. Gioia A, Ceccoli L, Ronconi V, et al. Vitamin D levels and bone mineral density: Are LH levels involved in the pathogenesis of bone impairment in hypogonadal men? *J Endocrinol Invest* 2014; 37: 1225–31.
71. Gooren LJ, Saad F, Haide A, et al. Decline of plasma 5alpha-dihydrotestosterone (DHT) levels upon testosterone administration to elderly men with subnormal plasma testosterone and high DHT levels. *Andrologia* 2008; 40: 298.
72. Gopal RA, Bothra N, Acharya SV, et al. Treatment of hypogonadism with testosterone in patients with type 2 diabetes mellitus. *Endocr Pract* 2010; 16: 570–6.
73. Grinspoon S, Corcoran C, Askari H, et al. Effects of androgen administration in men with the AIDS wasting syndrome. A randomized, double-blind, placebo-controlled trial. *Ann Intern Med* 1998; 129: 18–26.
74. Grinspoon S, Corcoran C, Stanley T, Baaj A, Basgoz N, Klibanski A. Effects of hypogonadism and testosterone administration on depression indices in HIV-infected men. *J Clin Endocrinol Metab* 2000; 85: 60–5.
75. Guay AT, Perez JB, Fitaihi WA, Vereb M. Testosterone treatment in hypogonadal men: prostate-specific antigen level and risk of prostate cancer. *Endocr Pract* 2000; 6: 132–8.
76. Hackett G, Cole N, Bhartia M et al; BLAST Study Group. Testosterone replacement therapy improves metabolic parameters in hypogonadal men with type 2 diabetes but not in men with coexisting depression: the BLAST study. *J Sex Med* 2014; 11: 840.
77. Hackett G, Cole N, Bhartia M, et al. Testosterone replacement therapy with long-acting testosterone undecanoate improves sexual function and quality-of-life parameters vs. placebo in a population of men with type 2 diabetes. *J Sex Med* 2013; 10: 1612.
78. Hackett G, Cole N, Bhartia M, et al;BLAST Study Group. The response to testosterone undecanoate in men with type 2 diabetes is dependent on achieving threshold serum levels (the BLAST study). *Int J Clin Pract* 2014; 68: 203.
79. Hajjar RR, Kaiser FE, Morley JE. Outcomes of long-term testosterone replacement in older hypogonadal males: a retrospective analysis. *J Clin Endocrinol Metab* 1997; 82: 3793–6.
80. Handelsman DJ, Conway AJ, Boylan LM. Table . *J Clin Endocrin Metab* 1990; 71: 216.
81. Heufelder AE, Saad F, Bunck MC, et al. Fifty-two-week treatment with diet and exercise plus transdermal testosterone reverses the metabolic syndrome and improves glycemic control in men with newly diagnosed type 2 diabetes and subnormal plasma testosterone. *J Androl* 2009; 30: 726.
82. Hildreth KL, Barry DW, Moreau KL, et al. Effects of testosterone and progressive resistance exercise in healthy, highly functioning older men with low-normal testosterone levels. *J Clin Endocrinol Metab* 2013; 98: 1891–1900.
83. Ho CC, Tong SF, Low WY, et al. A randomized, double-blind, placebo-controlled trial on the effect of long-acting testosterone treatment as assessed by the Aging Male Symptoms scale. *BJU Int* 2012; 110: 260.
84. Hohl A, Marques MO, MH Coral, et al. Evaluation of late-onset hypogonadism (andropause) treatment using three different formulations of injectable testosterone. *Arq Bras Endocrinol Metabol* 2009; 53: 989.



85. Host C, Bojesen A, Frystyk J, Flyvbjerg A, Christiansen JS, Gravholt CH. Effect of sex hormone treatment on circulating adiponectin and subforms in Turner and Klinefelter syndrome. *Eur J Clin Invest* 2010; 40: 211–9.
86. Huang G, Bhasin S, Tang ER, et al. Effect of testosterone administration on liver fat in older men with mobility limitation: results from a randomized controlled trial. *J Gerontol A Biol Sci Med Sci.* 2013; 68: 954–9.
87. Huang G, Travison T, Maggio M, Edwards RR, Basaria S. Effects of testosterone replacement on metabolic and inflammatory markers in men with opioid-induced androgen deficiency. *Clinical Endocrinology.* 2016;85:232.
88. Jin B, Conway AJ, Handelsman DJ. Effects of androgen deficiency and replacement on prostate zonal volumes. *Clinical Endocrinology* 2001; 54: 437–45.
89. Jockenhovel F, Blum WF, Vogel E, et al. Testosterone substitution normalizes elevated serum leptin levels in hypogonadal men. *J Clin Endo Metabo* 1997; 82: 2510.
90. Jockenhovel F, Bullmann C, Schubert M, et al. Influence of various modes of androgen substitution on serum lipids and lipoproteins in hypogonadal men. *Metabolism* 1999; 48: 590.
91. Jockenhovel F, Minnemann T, Schubert M, et al. Comparison of long-acting testosterone undecanoate formulation versus testosterone enanthate on sexual function and mood in hypogonadal men. *Eur J Endocrinol* 2009; 160: 815.
92. Jockenhovel F, Minnemann T, Schubert M, et al. Timetable of effects of testosterone administration to hypogonadal men on variables of sex and mood. *Aging Male* 2009; 12: 113.
93. Jockenhovel F, Vogel E, Reinhardt W, et al. Effects of various modes of androgen substitution therapy on erythropoiesis. *Euro J Med Res* 1997; 2: 293.
94. Jones TH, Arver S, Behre HM, et al. Channer, TIMES2 Investigators. Testosterone replacement in hypogonadal men with type 2 diabetes and/or metabolic syndrome (the TIMES2 study). *Diabetes Care* 2011; 34: 828.
95. Jung HJ, Shin HS. Effect of Testosterone Replacement Therapy on Cognitive Performance and Depression in Men with Testosterone Deficiency Syndrome. 2016;34:194.
96. Kacker R, Connors W, Zade J, et al. Bone mineral density and response to treatment in men younger than 50 years with testosterone deficiency and sexual dysfunction or infertility. *J Urology* 2014; 191: 1072–6.
97. Kalinchenko S, Vishnevskiy EL, Koval AN, Mskhalaya GJ, Saad F. Beneficial effects of testosterone administration on symptoms of the lower urinary tract in men with late-onset hypogonadism: A pilot study. *Aging Male.* 2008; 11: 57–61.
98. Kalinchenko SY, Tishova Y.A, Mskhalaya GJ, et al. Effects of testosterone supplementation on markers of the metabolic syndrome and inflammation in hypogonadal men with the metabolic syndrome: the double-blinded placebo-controlled Moscow study. *Clin Endocrinol* 2010; 73: 602.
99. Kang SM, Jang Y, Kim JY, et al. Effect of oral administration of testosterone on brachial arterial vasoreactivity in men with coronary artery disease. *Am J Cardiol* 2002;89: 862–4.
100. Kaplan AL, Trinh QD, Sun M, et al. Testosterone replacement therapy following the diagnosis of prostate cancer: Outcomes and utilization trends. *J Sex Med* 2014; 11: 1063–70.
101. Kapoor D, Clarke S, Stanworth R., et al. The effect of testosterone replacement therapy on adipocytokines and C-reactive protein in hypogonadal men with type 2 diabetes. *Eur J Endocrinol* 2007; 156: 595–602.
102. Kapoor D, Goodwin E, Channer KS, et al. Testosterone replacement therapy improves insulin resistance, glycaemic control, visceral adiposity and hypercholesterolaemia in hypogonadal men with type 2 diabetes. *Eur J Endocrinol* 2006; 154: 899.
103. Kaufman JM, Miller MG, Garwin JL, et al. Efficacy and safety study of 1.62% testosterone gel for the treatment of hypogonadal men. *J Sex Med* 2011; 8: 2079.
104. Kenny AM, Kleppinger A, Annis K, et al. Effects of transdermal testosterone on bone and muscle in older men with low bioavailable testosterone levels, low bone mass, and physical frailty. *J Am Geriatr Soc.* 2010; 58: 1134–43.
105. Konaka H, Sugimoto K, Orikasa H, et al. Effects of long-term androgen replacement therapy on the physical and mental statuses of aging males with late-onset hypogonadism: a multicenter randomized controlled trial in Japan (EARTH Study). *Asian Journal of Andrology.* 2016;18:25.
106. Kubler A, Schulz G, Cordes U, et al. The influence of testosterone substitution on bone mineral density in patients with Klinefelter's syndrome. *Exp Clin Endocrinol* 1992; 100: 129–32.
107. Kuhnert B, Byrne M, Simoni M, et al. Testosterone substitution with a new transdermal, hydroalcoholic gel applied to scrotal or non-scrotal skin: a multicentre trial. *Eur J Endocrinol* 2005; 153: 317.

108. Layton JB, Meier CR, Sharpless JL, Sturmer T, Jick SS, Brookhart MA. Comparative Safety of Testosterone Dosage Forms. *JAMA Intern Med.* 2015;175:1187.
109. Lu J, Fan J, Zhu J, et al. The prospective and randomized control study of Viagra combined with Andriol in the treatment of ED in the aging male. *Chinese J Androl* 2003; 17: 194.
110. Maggi M, Heiselman D, Knorr J, Iyengar S, Paduch DA, Donatucci CF. Impact of Testosterone Solution 2% on Ejaculatory Dysfunction in Hypogonadal Men. *Journal of Sexual Medicine.* 2017;13:1220.
111. Magnussen LV, Glintborg D, Hermann P, Hougaard DM, Hojlund K, Andersen M. Effect of testosterone on insulin sensitivity, oxidative metabolism and body composition in aging men with type 2 diabetes on metformin monotherapy. *Diabetes Obes Metab.* 2016;18:980.
112. Majzoub A, Shoskes DA. A case series of the safety and efficacy of testosterone replacement therapy in renal failure and kidney transplant patients. *Translational Andrology and Urology.* 2016;5:814.
113. Mark Ng Tang F, Luke AP, Philippe D, et al. Effects of testosterone treatment on body fat and lean mass in obese men on a hypocaloric diet: a randomised controlled trial. *BMC medicine.* 2016:153.
114. Marks LS, Mazer NA, Mostaghel E, et al. Effect of testosterone replacement therapy on prostate tissue in men with late-onset hypogonadism: a randomized controlled trial. *JAMA* 2006; 296: 2351–61.
115. Mathur A, Malkin C, Saeed B, et al. Long-term benefits of testosterone replacement therapy on angina threshold and atheroma in men. *Eur J Endocrinol* 2009; 161: 443.
116. McCullough AR, Khera M, Goldstein I, et al. A multi-institutional observational study of testosterone levels after testosterone pellet (Testopel) insertion. *J Sex Med* 2012; 9: 594.
117. McNicholas TA, Dean JD, Mulder H, Carnegie C, Jones NA. A novel testosterone gel formulation normalizes androgen levels in hypogonadal men, with improvements in body composition and sexual function. *BJU International.* 2003; 91: 69–74.
118. Merza Z, Blumsohn A, Mah PM, et al. Double-blind placebo-controlled study of testosterone patch therapy on bone turnover in men with borderline hypogonadism. *Int J Androl* 2006; 29: 381.
119. Minnemann T, Schubert M, Freude S, et al. Comparison of a new long-acting testosterone undecanoate formulation vs testosterone enanthate for intramuscular androgen therapy in male hypogonadism. *J Endocrinol Invest* 2008; 31: 718.
120. Montano M, Flanagan JN, Jiang L, et al. Transcriptional profiling of testosterone-regulated genes in the skeletal muscle of human immunodeficiency virus-infected men experiencing weight loss. *J Clin Endocrinol Metab.* 2007; 92: 2793–802.
121. Morales A, Black A, Emerson L, Barkin J, Kuzmarov I, Day A. Androgens and sexual function: a placebo-controlled, randomized, double-blind study of testosterone vs. dehydroepiandrosterone in men with sexual dysfunction and androgen deficiency. *Aging Male* 2009; 12: 104–12.
122. Morgentaler A, Benesh JA, Denes BS, Kan-Dobrosky N, Harb D, Miller MG. Factors influencing prostate-specific antigen response among men treated with testosterone therapy for 6 months. *J Sex Med* 2014; 11: 2818–25.
123. Morgunov LI, Denisova IA, Rozhkova TI, et al. Androgenic deficit and its treatment in stroke male patients with diabetes mellitus type II. *Zh Nevrol Psikhiatr Im S S Korsakova* 2011; 111: 21.
124. Muraleedharan V, Marsh H, Kapoor D, Channer KS, Jones TH. Testosterone deficiency is associated with increased risk of mortality and testosterone replacement improves survival in men with type 2 diabetes. *Eur J Endocrinol* 2013; 169(6): 725–33.
125. Nakhai-Pour HR, Grobbee DE, Emmelot-Vonk MH, Bots ML, Verhaar HJ, van der Schouw YT. Oral testosterone supplementation and chronic low-grade inflammation in elderly men: a 26-week randomized, placebo-controlled trial. *Am Heart J* 2007;154(6): 1228.
126. Nasser M, Haider A, Saad F, et al. Testosterone therapy in men with Crohn's disease improves the clinical course of the disease: Data from long-term observational registry study. *Hormone Molecular Biology and Clinical Investigation.* 2015;22:111.
127. O'Connell MD, Roberts SA, Srinivas-Shankar U, et al. Do the effects of testosterone on muscle strength, physical function, body composition, and quality of life persist six months after treatment in intermediate-frail and frail elderly men? *J Clin Endocrinol Metab* 2011; 96: 454.
128. Orengo CA, Fullerton L, Kunik ME. Safety and efficacy of testosterone gel 1% augmentation in depressed men with partial response to antidepressant therapy. *J Geriatr Psychiatry Neurol* 2005; 18: 20–4.

129. Paduch DA, Polzer PK, Ni X, Basaria S. Testosterone Replacement in Androgen-Deficient Men With Ejaculatory Dysfunction: A Randomized Controlled Trial. *Journal of Clinical Endocrinology and Metabolism*. 2015;100:2956.
130. Page ST, Amory JK, Bowman FD, et al. Exogenous testosterone (T) alone or with finasteride increases physical performance, grip strength, and lean body mass in older men with low serum T. *J Clin Endocrinol Metab* 2005; 90: 1502–10.
131. Park NC, Yan BQ, Chung JM, Lee KM. Oral testosterone undecanoate (Andriol) supplement therapy improves the quality of life for men with testosterone deficiency. *Aging Male* 2003; 6: 86–93.
132. Pastuszak AW, Gomez LP, Scovell JM, Khera M, Lamb DJ, Lipshultz LI. Comparison of the Effects of Testosterone Gels, Injections, and Pellets on Serum Hormones, Erythrocytosis, Lipids, and Prostate-Specific Antigen. *Sexual Medicine*. 2015;3:165.
133. Ramasamy R, Scovell J, Mederos M, Ren R, Jain L, Lipshultz L. Association between Testosterone Supplementation Therapy and Thrombotic Events in Elderly Men. *Urology*. 2015;86:283.
134. Raynaud JP, Legros JJ, Rollet J, et al. Efficacy and safety of a new testosterone-in-adhesive matrix patch applied every 2 days for 1 year to hypogonadal men. *J Steroid Biochem Mol Biol* 2008; 109: 168.
135. Reid IR, Wattie DJ, Evans MC, et al. Testosterone therapy in glucocorticoid-treated men. *Arch Intern Med* 1996; 156: 1173.
136. Resnick SM, Matsumoto AM, Stephens-Shields AJ, et al. Testosterone Treatment and Cognitive Function in Older Men With Low Testosterone and Age-Associated Memory Impairment. *JAMA : the journal of the American Medical Association*. 2017;317:717.
137. Rhoden EL, Morgentaler A. Influence of demographic factors and biochemical characteristics on the prostate-specific antigen (PSA) response to testosterone replacement therapy. *Int J Impot Res* 2006;18: 201–5.
138. Ross RJM, Siyambalapitiya S, Jonsson P, Koltowska-Haggstrom M, Gaillard R, Ho K. Cross-sectional analysis of testosterone therapies in hypopituitary men on stable pituitary hormone replacement. *Clin Endocrinol* 2009; 70: 907–13.
139. Roy CN, Snyder PJ, Stephens-Shields AJ, et al. Association of Testosterone Levels With Anemia in Older Men: A Controlled Clinical Trial. *JAMA Intern Med*. 2017;177:480.
140. Saad F, Gooren LJ, Haider A, et al. A dose-response study of testosterone on sexual dysfunction and features of the metabolic syndrome using testosterone gel and parenteral testosterone undecanoate. *J Androl* 2008; 29: 102.
141. Saeedi M, Kosaryan M, Fekri K, et al. A randomized, double-blind, controlled trial of testosterone gel treatment versus vehicle control on the facial hair of young men with beta-thalassemia major. *J Dermatol Treat* 2007; 18: 271.
142. Santos MRD, Sayegh ALC, Bacurau AVN, et al. Effect of Exercise Training and Testosterone Replacement on Skeletal Muscle Wasting in Patients with Heart Failure with Testosterone Deficiency. *Mayo Clin Proc*. 2016;91:575.
143. Schubert M, Bullmann C, Minnemann T, et al. Osteoporosis in male hypogonadism: responses to androgen substitution differ among men with primary and secondary hypogonadism. *Hormone Res* 2003; 60: 21.
144. Schubert M, Minnemann T, Hubler D, et al. Intramuscular testosterone undecanoate: pharmacokinetic aspects of a novel testosterone formulation during long-term treatment of men with hypogonadism. *J Clin Endocrinol Metab* 2004; 89: 5429.
145. Schwartz JB, Volterrani M, Caminiti G, et al. Effects of testosterone on the Q-T interval in older men and older women with chronic heart failure. *Int J Androl* 2011; 34: e415.
146. Seftel AD, Mack RJ, Secrest AR, Smith TM. Restorative increases in serum testosterone levels are significantly correlated to improvements in sexual functioning. *J Androl* 2004; 25: 963–72.
147. Shabsigh R, Kaufman JM, Steidle C, Padma-Nathan H. Randomized study of testosterone gel as adjunctive therapy to sildenafil in hypogonadal men with erectile dysfunction who do not respond to sildenafil alone. *J Urol* 2004; 172: 658–63.
148. Sheffield-Moore M, Dillon EL, Casperson SL, et al. A randomized pilot study of monthly cycled testosterone replacement or continuous testosterone replacement versus placebo in older men. *J Clin Endocrinol Metab* 2011; 96: E1831–E1837.
149. Shigehara K, Konaka H, Koh E, et al. Effects of testosterone replacement therapy on nocturia and quality of life in men with hypogonadism: a subanalysis of a previous prospective randomized controlled study in Japan. *Aging Male*. 2015;18:169.

150. Shigehara K, Konaka H, Koh E, et al. Effects of testosterone replacement therapy on hypogonadal men with osteopenia or osteoporosis: a subanalysis of a prospective randomized controlled study in Japan (EARTH study). *Aging Male*. 2017;1.
151. Shigehara K, Sugimoto K, Konaka H, et al. Androgen replacement therapy contributes to improving lower urinary tract symptoms in patients with hypogonadism and benign prostate hypertrophy: a randomised controlled study. *Aging Male* 2011; 14: 53.
152. Shores MM, Kivlahan DR, Sadak TI, Li EJ, Matsumoto AM. A randomized, double-blind, placebo-controlled study of testosterone treatment in hypogonadal older men with subthreshold depression (dysthymia or minor depression). *J Clin Psychiatry* 2009; 70: 1009–16.
153. Shores MM, Smith NL, Forsberg CW, Anawalt BD, Matsumoto AM. Testosterone treatment and mortality in men with low testosterone levels. *J Clin Endocrinol Metab* 2012; 97: 2050–8.
154. Sih R, Morley JE, Kaiser FE, Perry HM, III, Patrick P, Ross C. Testosterone replacement in older hypogonadal men: a 12-month randomized controlled trial. *J Clin Endocrinol Metab* 1997; 82: 1661–7.
155. Simon D, Charles MA, Lahlou N, et al. Androgen therapy improves insulin sensitivity and decreases leptin level in healthy adult men with low plasma total testosterone: a 3-month randomized placebo-controlled trial. *Diabetes Care* 2001; 24: 2149–51.
156. Sinclair M, Grossmann M, Hoermann R, Angus PW, Gow PJ. Testosterone therapy increases muscle mass in men with cirrhosis and low testosterone: a randomised controlled trial. *J Hepatol*. 2017;65:906.
157. Snyder PJ, Bhasin S, Cunningham GR, et al. Effects of Testosterone Treatment in Older Men. *N Engl J Med*. 2016;374:611.
158. Snyder PJ, Kopperdahl DL, Stephens-Shields AJ, et al. Effect of Testosterone Treatment on Volumetric Bone Density and Strength in Older Men With Low Testosterone: A Controlled Clinical Trial. *JAMA Intern Med*. 2017;177:471.
159. Spitzer M, Basaria S, Travison TG, Davda MN, DeRogatis L, Bhasin S. The effect of testosterone on mood and well-being in men with erectile dysfunction in a randomized, placebo-controlled trial. *Andrology* 2013; 1: 475–82.
160. Spitzer M, Basaria S, Travison TG, et al. Effect of testosterone replacement on response to sildenafil citrate in men with erectile dysfunction: a parallel, randomized trial. *Ann Intern Med* 2012; 157: 681–91.
161. Srinivas-Shankar U, Roberts SA, Connolly MJ, et al. Effects of testosterone on muscle strength, physical function, body composition, and quality of life in intermediate-frail and frail elderly men: a randomized, double-blind, placebo-controlled study. *J Clin Endocrinol Metab* 2010; 95: 639.
162. Stanworth RD, Akhtar S, Channer KS, et al. The role of androgen receptor CAG repeat polymorphism and other factors which affect the clinical response to testosterone replacement in metabolic syndrome and type 2 diabetes: TIMES2 sub-study. *Eur J Endocrinol* 2014; 170: 193.
163. Steidle C, Schwartz S, Jacoby K, et al. AA2500 testosterone gel normalizes androgen levels in aging males with improvements in body composition and sexual function. *J Clin Endocrinol Metab* 2003; 88: 2673–81.
164. Storer TW, Basaria S, Traustadottir T, et al. Effects of testosterone supplementation for 3 years on muscle performance and physical function in older men. *Journal of Clinical Endocrinology and Metabolism*. 2017;102:583.
165. Storer TW, Bhasin S, Travison TG, et al. Testosterone attenuates age-related fall in aerobic function in mobility limited older men with low testosterone. *Journal of Clinical Endocrinology and Metabolism*. 2016;101:2562.
166. Stout M, Tew GA, Doll H, et al. Testosterone therapy during exercise rehabilitation in male patients with chronic heart failure who have low testosterone status: a double-blind randomized controlled feasibility study. *Am Heart J* 2012; 164: 893.
167. Strollo F, Strollo G, More M, et al. Low-intermediate dose testosterone replacement therapy by different pharmaceutical preparations improves frailty score in elderly hypogonadal hyperglycaemic patients. *Aging Male* 2013; 16: 33–7.
168. Sullivan DH, Roberson PK, Johnson LE, et al. Effects of muscle strength training and testosterone in frail elderly males. *Med Sci Sports Exerc* 2005; 37: 1664–72.
169. Svartberg J, Agledahl I, Figenschau Y, et al. Testosterone treatment in elderly men with subnormal testosterone levels improves body composition and BMD in the hip. *Int J Impot Res* 2008; 20: 378.
170. Swerdloff RS, Pak Y, Wang C, et al. Serum Testosterone (T) Level Variability in T Gel-Treated Older Hypogonadal Men: Treatment Monitoring Implications. *Journal of Clinical Endocrinology and Metabolism*. 2015;100:3280.

- 171.Swerdloff RS, Wang C, Cunningham G, et al. Long-term pharmacokinetics of transdermal testosterone gel in hypogonadal men. *J Clin Endocrinol Metab* 2000; 85: 4500–10.
- 172.Swerdloff RS, Wang C. Three-year follow-up of androgen treatment in hypogonadal men: preliminary report with testosterone gel. *Aging Male* 2003; 6: 207–11.
- 173.Tan RS, Pu SJ. A pilot study on the effects of testosterone in hypogonadal aging male patients with Alzheimer's disease. *Aging Male* 2003; 6: 13–7.
- 174.Tan WS, Low WY, Ng CJ, et al. Efficacy and safety of long-acting intramuscular testosterone undecanoate in aging men: a randomised controlled study. *BJU Int* 2013; 111: 1130.
- 175.Taylor F, Levine L. Clomiphene citrate and testosterone gel replacement therapy for male hypogonadism: Efficacy and treatment cost. *J Sex Med* 2010; 7: 269–76.
- 176.Tenover JS. Effects of testosterone supplementation in the aging male. *J Clin Endocrinol Metab* 1992; 75: 1092–8.
- 177.Thomson S, Koren G, Van SV, Rieder M, Van Uum SHM. Testosterone concentrations in hair of hypogonadal men with and without testosterone replacement therapy. *Therapeutic Drug Monitor* 2009; 31: 779–82.
- 178.Tong SF, Ng CJ, Lee BC, et al. Effect of long-acting testosterone undecanoate treatment on quality of life in men with testosterone deficiency syndrome: a double blind randomized controlled trial. *Asian J Androl* 2012; 14: 604.
- 179.Trabado S, Maione L, Bry-Gauillard H, et al. Insulin-like peptide 3 (INSL3) in men with congenital hypogonadotropic hypogonadism/kallmann syndrome and effects of different modalities of hormonal treatment: A single-center study of 281 patients. *J Clin Endocrinol Metab* 2014; 99: E268–E275.
- 180.Trabado S, Maione L, Salenave S, et al. Estradiol levels in men with congenital hypogonadotropic hypogonadism and the effects of different modalities of hormonal treatment. *Fertil Steril* 2011; 95: 2324–9.
- 181.Traish AM, Haider A, Haider KS, Doros G, Saad F. Long-Term Testosterone Therapy Improves Cardiometabolic Function and Reduces Risk of Cardiovascular Disease in Men with Hypogonadism. 2017;1074248417691136.
- 182.Travison TG, Basaria S, Storer TW, et al. Clinical meaningfulness of the changes in muscle performance and physical function associated with testosterone administration in older men with mobility limitation. *J Gerontol A Biol Sci Med Sci* 2011; 66: 1090–9.
- 183.van den Bergh JP, Hermus AR, Spruyt AI, Sweep CG, Corstens FH, Smals AG. Bone mineral density and quantitative ultrasound parameters in patients with Klinefelter's syndrome after long-term testosterone substitution. *Osteoporos Int* 2001; 12: 55–62.
- 184.Vaughan C, Goldstein FC, Tenover JL. Exogenous testosterone alone or with finasteride does not improve measurements of cognition in healthy older men with low serum testosterone. *J Androl* 2007; 28: 875–82.
- 185.Vigen R, O'Donnell CI, Baron AE, et al. Association of testosterone therapy with mortality, myocardial infarction, and stroke in men with low testosterone levels. *JAMA* 2013; 310: 1829–36.
- 186.Vignera S. La, Calogero AE, D'Agata R, et al. Testosterone therapy improves the clinical response to conventional treatment for male patients with metabolic syndrome associated to late onset hypogonadism. *Minerva Endocrinologica* 2008; 33: 159.
- 187.Vignera S. La, Condorelli R, Vicari E, et al. Original immunophenotype of blood endothelial progenitor cells and microparticles in patients with isolated arterial erectile dysfunction and late onset hypogonadism: Effects of androgen replacement therapy. *Aging Male* 2011; 14: 183–9
- 188.Wang C, Cunningham G, Dobs A, et al. Long-term testosterone gel (AndroGel) treatment maintains beneficial effects on sexual function and mood, lean and fat mass, and bone mineral density in hypogonadal men. *J Clin Endocrinol Metab* 2004; 89: 2085–98.
- 189.Wang C, Swerdloff RS, Iranmanesh A, et al. Effects of transdermal testosterone gel on bone turnover markers and bone mineral density in hypogonadal men. *Clin Endocrinol* 2001; 54: 739–50.
- 190.Wang C, Swerdloff RS, Iranmanesh A, et al. Transdermal testosterone gel improves sexual function, mood, muscle strength, and body composition parameters in hypogonadal men. *J Clin Endocrinol Metab* 2000; 85: 2839–53.
- 191.Wang YJ, Zhan JK, Huang W, et al. Effects of low-dose testosterone undecanoate treatment on bone mineral density and bone turnover markers in elderly male osteoporosis with low serum testosterone. *Int J Endocrinol* 2013: 570413.
- 192.Wiehle RD, Fontenot GK, Wike J, Hsu K, Nydell J, Lipshultz L. Enclomiphene citrate stimulates testosterone production while preventing oligospermia: A randomized phase II clinical trial comparing topical testosterone. *Fertil Steril* 2014; 102: 720–7.

193. Yaron M, Greenman Y, Rosenfeld JB, et al. Effect of testosterone replacement therapy on arterial stiffness in older hypogonadal men. *Eur J Endocrinol* 2009; 160: 839–46.
194. Yassin A, Salman M, Talib RA, Yassin DJ. Is there a protective role of testosterone against high-grade prostate cancer? Incidence and severity of prostate cancer in 553 patients who underwent prostate biopsy: a prospective data register. *Aging Male*. 2017;()():1.
195. Zhang XW, Liu ZH, Hu XW, et al. Androgen replacement therapy improves psychological distress and health-related quality of life in late onset hypogonadism patients in Chinese population. *Chin Med J* 2012; 125: 3806–10.
196. Zitzmann M, Depenbusch M, Gromoll J, Nieschlag E. Prostate volume and growth in testosterone-substituted hypogonadal men are dependent on the CAG repeat polymorphism of the androgen receptor gene: a longitudinal pharmacogenetic study. *J Clin Endocrinol Metab* 2003; 88: 2049–54.

## eAppendix 4: Characteristics of the included RCTs and NRS

eTable 1: Characteristics of included RCTs that reported at least 1 outcome of interest

| Author, year, page<br>(companion<br>publications)                                                                                                                                                   | Population*                                                                                                                                           | Duration | Groups (no. randomized)                        | Age, yr, mean (SD);                         | Baseline Total T, mean<br>(SD), nmol/L       | Industry<br>funding |
|-----------------------------------------------------------------------------------------------------------------------------------------------------------------------------------------------------|-------------------------------------------------------------------------------------------------------------------------------------------------------|----------|------------------------------------------------|---------------------------------------------|----------------------------------------------|---------------------|
| Dias 2016, p. 1865 (Dias 2017 p.143; Dias 2016, p. 33; Dias 2017, p. 31)                                                                                                                            | Older men with low testosterone                                                                                                                       | 12 mo    | 1% Gel, 50 mg/d (16)<br>Placebo (13)           | 72 (SEM 1)<br>72 (SEM 1)                    | 10.4 (1.9)<br>10.5 (2.1)                     | No                  |
| Chillaron 2016, p. 849                                                                                                                                                                              | T1D                                                                                                                                                   | 22 wk    | IM TU 1000 mg/10 wk (6)<br>Placebo (7)         | 47.9 (7.3)<br>45.2 (11.7)                   | 12.4 (3.5)<br>9.9 (4.5)                      | Yes                 |
| Brock 2016, p. 699 (Maggi 2017, p. 1220)                                                                                                                                                            | ≥ 1 symptom of testosterone deficiency                                                                                                                | 12 wk    | 2% solution, 60 mg/d (358)<br>Placebo (357)    | 54.7 (10.6)<br>55.9 (11.4)                  | 7.0 (2.3)<br>7.0 (2.3)                       | Yes                 |
| Dhindsa 2016, p. 82                                                                                                                                                                                 | T2DM                                                                                                                                                  | 24 wk    | IM TC, 250 mg/2wk (22)<br>Placebo (22)         | 54.6 (7.9)<br>(NR by group)                 | 8.7 (2.8)<br>(NR by group)                   | No                  |
| Konaka 2016, p. 25 (Shigehara 2017, p. 1; Shigehara 2015, p. 169)                                                                                                                                   | Late onset hypogonadism                                                                                                                               | 52 wk    | IM TE, 250 mg/4 wk (169)<br>No treatment (165) | 65.7 (9)<br>67.6 (9.4)                      | Free T 7.1 (3.2)<br>6.7 (3.5) pg/ml          | No                  |
| Magnussen 2016, p. 980                                                                                                                                                                              | T2DM                                                                                                                                                  | 24 wk    | 1% gel, 50 mg/d (22)<br>Placebo (21)           | 61 (6)<br>59 (6)                            | 7.1 (95%CI 6.6-11.9)<br>9.4 (95%CI 8.1-12.5) | Yes                 |
| Ng Tang Fui 2016, p. 153 (Ng Tang Fui 2017, p. 420)                                                                                                                                                 | BMI ≥ 30                                                                                                                                              | 56 wk    | IM TU, 1000 mg/10 wk (49)<br>Placebo (51)      | 54.3 (IQR 47.3-59.8)<br>52.8 (IQR47.6-60.1) | 8.2 (2.5)<br>8.4 (2.3)                       | Yes                 |
| Sinclair 2016, p. 906                                                                                                                                                                               | Cirrhosis                                                                                                                                             | 54 wk    | IM TU, 1000 mg/12 wk (50)<br>Placebo (51)      | 55.5 (IQR 52-60)<br>54.0 (IQR 50-59)        | 9.3 (IQR 3.9-17)<br>9.1 (IQR 2.7-12.7)       | Yes                 |
| Snyder 2016 p. 611† (Cunningham 2016, p. 3096; Snyder 2017, p. 471; Roy 2017, p. 480; Resnick 2017, p. 717; Cunningham 2015, p. 1146; Abd Alamir 2016, p. 95; Swerdloff 2015, p. 3280; Budoff 2017, | Older men with decreased libido or sexual function (Sexual function trial); limited mobility (Physical function trial); low vitality (Vitality trial) | 12 mo    | 1% gel, 50 mg/d (395)<br>Placebo (395)         | 72.1 (5.7)<br>72.3 (5.8)                    | 8.0 (2.2)<br>8.2 (2.3)                       | Mix                 |

Supplemental Online Content: Elliott et al. Testosterone therapy in hypogonadal men: a systematic review and network meta-analysis.

| p. 708)                                                                              |                                      |       |                                                                                    |                                        |                                     |     |
|--------------------------------------------------------------------------------------|--------------------------------------|-------|------------------------------------------------------------------------------------|----------------------------------------|-------------------------------------|-----|
| <b>Basaria 2015, p. 570<br/>(Storer 2017, p. 583)</b>                                | Older men                            | 3 yr  | 1% gel, 75 mg/d (156)<br>Placebo (152)                                             | 66.9 (5.0)<br>68.3 (5.3)               | 10.7 (2.2)<br>10.7 (2.3)            | Yes |
| <b>Basaria 2015, p. 280<br/>(Huang 2016, p. 232)</b>                                 | Opioid-induced hypogonadism          | 12 wk | 1% gel, 50 mg/d (43)<br>Placebo (41)                                               | 48 (9)<br>50 (6)                       | 8.2 (3.4)<br>7.7 (3.0)              | Yes |
| <b>Cherrier 2015, p. 421</b>                                                         | Mild cognitive impairment            | 6 mo  | Gel, 50-100 mg/d (10)<br>Placebo (12)                                              | 70.5 (8.2)                             | 10.7 (3.2)<br>9.8 (2.7)             | Mix |
| <b>Paduch 2015, p.2956</b>                                                           | Ejaculatory dysfunction              | 16 wk | 2% solution, 60 mg/d (36)<br>Placebo (40)                                          | 48.4 (9.8)<br>52.7 (9.3)               | 7.4 (1.9)<br>7.7 (1.8)              | Yes |
| <b>Borst 2014, p. E433</b>                                                           | Hypogonadal                          | 12 mo | Placebo (16)<br>IM TE, 125 mg/wk (14)                                              | 70.8 (9.7)<br>69.2 (8.0)               | 8.5 (10.1)<br>9.2 (11.9)            | Mix |
| <b>Gianatti 2014, p. 2098<br/>(Gianatti 2014, p. 3821;<br/>Gianatti 2016, p. 55)</b> | Type 2 diabetes                      | 40 wk | Placebo (43)<br>IM TU, 1000 mg/12 wk (45)                                          | 62 (7.4)<br>62 (8.1)                   | 8.5 (2.8)<br>8.7 (3.0)              | Yes |
| <b>Hackett 2013, p.1891<br/>(Hackett 2013, p. 1612,<br/>Hackett 2014)</b>            | T2DM and symptoms of hypogonadism    | 30 wk | Placebo (102)<br>IM TU, 1000 mg/12 wk (97)                                         | 62.0 (9.3)<br>61.2 (10.5)              | 8.9 (3.8)<br>9.2 (3.1)              | Yes |
| <b>Wang 2013, p. 1</b>                                                               | Osteoporosis                         | 24 mo | Placebo (62)<br>Oral TU, 20 mg/d (62)<br>Oral TU, 40 mg/d (62)                     | 68.0 (4.8)<br>68.4 (5.5)<br>68.1 (5.4) | 7.6 (0.7)<br>7.6 (0.9)<br>7.4 (0.8) | No  |
| <b>Behre 2012, p. 198</b>                                                            | AMS score >36                        | 6 mo  | Placebo (179)<br>1% gel, 50 mg/d (183)                                             | 62.1 (6.3)<br>61.9 (6.6)               | 10.6 (2.6)<br>10.4 (2.6)            | Yes |
| <b>Spitzer 2012, p. 681<br/>(Spitzer 2013)</b>                                       | Erectile dysfunction                 | 14 wk | Placebo (70)<br>1% gel, 100 mg/d (70)                                              | 54.6 (8.5)<br>55.1 (8.3)               | 8.8 (2.4)<br>8.6 (2.2)              | No  |
| <b>Stout 2012, p. 893</b>                                                            | Chronic heart failure                | 12 wk | Placebo (20)<br>Sustanon, 100 mg/2 wk (20)                                         | 65.9 (8.8)<br>68.3 (5.3)               | 11.2 (2.6)<br>10.4 (2.7)            | No  |
| <b>Zhang 2012, p. 3806</b>                                                           | Positive score on ADAM questionnaire | 6 mo  | Vitamin E/C (80)<br>Oral TU, 120 or 160 mg/d<br>(based on T level at baseline)(80) | 61.1 (7.1)<br>59.4 (6.3)               | 7.7 (0.8)<br>8.0 (0.7)              | No  |
| <b>Ho 2011, p. 260 (Tan<br/>2013, Tong 2012)</b>                                     | At least mild AMS symptoms           | 42 wk | Placebo (60)<br>IM TU, 1000 mg/12 wk (60)                                          | 53.0 (8.2)<br>53.4 (7.4)               | 8.9 (2)<br>9.1 (1.8)                | Yes |
| <b>Jones 2011, p. 828</b>                                                            | MetS or T2DM                         | 12 mo | Placebo (112)                                                                      | 59.9 (9.4)                             | 9.5 (3.3)                           | Yes |



|                                                                                                  |                                          |          |                                                                   |                             |                                              |     |
|--------------------------------------------------------------------------------------------------|------------------------------------------|----------|-------------------------------------------------------------------|-----------------------------|----------------------------------------------|-----|
| <b>(Stanworth 2014)</b>                                                                          | with at least 2 symptoms of hypogonadism |          | 2% gel, 60 mg/d (108)                                             | 59.9 (9.1)                  | 9.2 (2.6)                                    |     |
| <b>Kaufman 2011, p. 2079</b>                                                                     | “otherwise healthy”                      | 6 mo     | Placebo (40)<br>1.62% gel, 40.5 mg/d (234)                        | 55.5 (10.3)<br>53.6 (9.5)   | 10.2 (NR)<br>9.8 (NR)                        | Yes |
| <b>Sheffield-Moore 2011, p. E1831 (Fitts 2015, p. E223)</b>                                      | Community-dwelling men                   | 5 mo     | Placebo (8)<br>IM TE, 100 mg/wk (8)                               | 65 (3)<br>73 (8)            | 11.8 (2.9)<br>11.9(2.9)                      | No  |
| <b>Shigehara 2011, p. 53</b>                                                                     | Benign prostate hypertrophy              | 12 mo    | No treatment (26)<br>IM TE, 250 mg/4 wk (26)                      | 68.9 (9.1)<br>72 (6.5)      | Free T<br>6.7 (1.9) pg/ml<br>7.0 (1.7) pg/ml | NR  |
| <b>Aversa 2010, p. 776</b>                                                                       | MetS or T2DM                             | 6 mo     | Placebo (10)<br>Oral TU 160 mg/d (10)<br>IM TU 1000 mg/12 wk (32) | 55 (5)<br>57 (8)<br>58 (10) | 11.1<br>(NR by group)                        | NR  |
| <b>Aversa 2010, p. 3495</b>                                                                      | MetS or T2DM                             | 12 mo    | Placebo (10)<br>IM TU, 1000 mg/12wk (40)                          | 57 (8)<br>58 (10)           | 9.0 (1.7)<br>8.33 (2.4)                      | NR  |
| <b>Basaria 2010, p. 109 (Bachman 2014, Huang 2013, Basaria 2013, Travison 2011; Storer 2016)</b> | Limited mobility                         | 6 mo     | Placebo (103)<br>1% gel, 100 mg/d (106)                           | 74 (5)<br>74 (6)            | 8.2 (2.3)<br>8.7 (2.0)                       | No  |
| <b>Kalinenko 2010, p. 602 (Giltay 2010)</b>                                                      | MetS                                     | 30 wk    | Placebo (71)<br>IM TU, 1000 mg/12wk (113)                         | 52.8 (9.67)<br>51.6 (9.76)  | 7.5 (5.2)<br>6.7 (3.0)                       | Yes |
| <b>Kenny 2010, p. 1134</b>                                                                       | Low bone mass and frailty                | 12–24 mo | Placebo (62)<br>1% gel, 5 mg/d (69)                               | 76.3 (8.0)<br>77.9 (7.3)    | 14.5 (6.7)<br>13.2 (6.2)                     | Mix |
| <b>Srinivas-Shankar 2010, p. 639 (O’Connell 2010, Atkinson 2010)</b>                             | Intermediate-frail and frail             | 6 mo     | Placebo (136)<br>1% gel, 50 mg/d (138)                            | 73.9 (6.4)<br>73.7 (5.7)    | 10.9 (3.1)<br>11 (3.2)                       | Yes |
| <b>Caminiti 2009, p. 919 (Schwartz 2011)</b>                                                     | Chronic heart failure                    | 12 wk    | Placebo (35)<br>IM TU, 1000 mg/6 wk (35)                          | 69 (66–74)<br>71 (67–76)    | 7.3 (7.3)<br>8.0 (6.2)                       | No  |
| <b>Chiang 2009, p. 467</b>                                                                       | Hypogonadal                              | 3 mo     | Placebo (20)<br>1% gel, 50 mg/d (20)                              | NR                          | NR                                           | NR  |
| <b>Emmelot-Vonk, 2009, p. 129 (Emmelot-Vonk 2008, Nakhai-Pour 2007, Buisson 2010)</b>            | Moderately low T levels                  | 26 wk    | Placebo (117)<br>Oral TU, 160 mg/d (120)                          | 67.4 (4.9)<br>67.1 (5.0)    | 10.4 (1.9)<br>11.0 (1.9)                     | No  |

|                                   |                                                      |             |                                                                                       |                                               |                                      |     |
|-----------------------------------|------------------------------------------------------|-------------|---------------------------------------------------------------------------------------|-----------------------------------------------|--------------------------------------|-----|
| <b>Heufelder 2009, p. 726</b>     | MetS and T2DM                                        | 52 wk       | Placebo (16)<br>1% gel, 50 mg/d (16)                                                  | 55.9 (6)<br>57.3 (5.6)                        | 10.4 (0.8)<br>10.5 (0.8)             | Yes |
| <b>Hohl 2009, p. 989</b>          | High AMS score                                       | 12 or 14 wk | IM TU, 1000 mg/6 wk (10)<br>IM TC, 200 mg/4wk (11)<br>Durateston, IM, 250 mg/4wk (11) | 59.6 (8.9)<br>59.6 (7.1)<br>60.4 (8.8)        | 9.9 (1.1)<br>10.1 (1.1)<br>9.9 (1.5) | No  |
| <b>Mathur 2009, p. 443</b>        | Chronic angina pectoris                              | 12 mo       | Placebo (7)<br>IM TU, 1000 mg/12 wk (8)                                               | 67.8 (7.9)<br>62.1 (5.2)                      | 10.1 (2.8)<br>9.8 (1.9)              | Yes |
| <b>Morales 2009, p. 104</b>       | Sexual dysfunction                                   | 4 mo        | Placebo (29)<br>Oral TU, 160 mg/d (29)                                                | 60.2 (9.6)<br>59.0 (10.6)                     | 10.0 (5.5)<br>10.2 (4.9)             | Yes |
| <b>Shores 2009, p. 1009</b>       | Dysthymia or minor depression                        | 12 wk       | Placebo (16)<br>1% gel, 75 mg/d (17)                                                  | 61.7 (7.0)<br>57.1 (5.7)                      | 9.3 (3.4)<br>10.1 (3.7)              | Mix |
| <b>Agledahl 2008, p. 641</b>      | Subnormal total T                                    | 52 wk       | Placebo (13)<br>IM TU, 1000 mg/12 wk (14)                                             | 69.3 (5.0)<br>68.9 (5.4)                      | 8.2 (2.4)<br>8.5 (1.7)               | Mix |
| <b>Basurto 2008, p. 140</b>       | Low total T                                          | 12 mo       | Placebo (23)<br>IM TE, 250 mg/3wk (25)                                                | 63.1 (7.7)<br>63.2 (8.5)                      | 10.8 (1.3)<br>10.4 (1.1)             | No  |
| <b>Raynaud 2008, p. 168</b>       | Hypogonadal                                          | 6 mo        | Patch, 4.8 mg/d(188)<br>IM TE, 250 mg/3 wk (36)                                       | 42.0 (12.7)<br>40.7 (10.5)                    | 4.6 (3.2)<br>5.1 (3.3)               | Yes |
| <b>Svartberg 2008, p. 378</b>     | NR                                                   | 12 mo       | Placebo (19)<br>IM TU, 1000 mg/12 wk (19)                                             | 69 (5)<br>69 (5)                              | 8.2 (2.1)<br>8.4 (1.7)               | Mix |
| <b>Chiang 2007, p. 411</b>        | Hypogonadal                                          | 3 mo        | Placebo (20)<br>1% gel, 50 mg/d (20)                                                  | 56.1 (14.6)<br>47.9 (17.0)                    | 9.1 (6.9)<br>7.4 (5.6)               | Yes |
| <b>Brockenbrough 2006, p. 251</b> | Hemodialysis-dependent end-stage renal disease       | 6 mo        | Placebo (21)<br>1% gel, 100 mg/d (19)                                                 | 53.0 (17.2)<br>58.9 (14.9)                    | 7.0 (3.0)<br>7.6 (2.2)               | Yes |
| <b>Marks 2006, p. 2351</b>        | Symptoms of LOH                                      | 6 mo        | Placebo (22)<br>IM TE, 150 mg/2wk (22)                                                | 68 (NR)<br>70 (NR)                            | 8.7 (1.6)<br>7.7 (1.4)               | Mix |
| <b>Merza 2006, p. 381</b>         | Sexual dysfunction                                   | 6 mo        | Placebo (19)<br>Patch, 5 mg/d (20)                                                    | 59.7 (10.2)<br>63.0 (9.0)                     | 7.5 (2.5)<br>8.4 (3.3)               | Yes |
| <b>Kuhnert 2005, p. 317</b>       | Primary, secondary, LOH and symptoms of T deficiency | 24 wk       | Patch, 5 mg/d (52)<br>2.5%, gel, 125 mg/d (56)<br>2.5%, scrotal gel, 25 mg/d (54)     | 53 (IQR 16)<br>52.2 (IQR 22.5)<br>50 (IQR 21) | NR                                   | Yes |
| <b>Orengo 2005, p. 20</b>         | Treatment-                                           | 12 wk       | Placebo (5)                                                                           | 63 (8.5) (NR by                               | 8.9 (1.7)                            | No  |

Supplemental Online Content: Elliott et al. Testosterone therapy in hypogonadal men: a systematic review and network meta-analysis.

|                                                                                    |                                                                     |       |                                                                                       |                                                        |                                                  |     |
|------------------------------------------------------------------------------------|---------------------------------------------------------------------|-------|---------------------------------------------------------------------------------------|--------------------------------------------------------|--------------------------------------------------|-----|
|                                                                                    | resistant depression                                                |       | 1% gel, 50 mg/d (7)                                                                   | group)                                                 | 10.2 (2.3)                                       |     |
| <b>Amory 2004, p. 503 (Page 2005, Vaughan 2007)</b>                                | T below the range of normal for young adult men                     | 36 mo | Placebo (24)<br>IM TE 200 mg/2wk (24)                                                 | 71 (4)<br>71 (4)                                       | 10.1 (2.1)<br>9.9 (1.6)                          | No  |
| <b>Cavallini 2004, p. 641</b>                                                      | Symptoms of androgen decline                                        | 6 mo  | Placebo (45)<br>Oral TU, 160 mg/d (40)                                                | 63 (NR)<br>64 (NR)                                     | 10.5 (2.1)<br>9.9 (1.8)                          | No  |
| <b>Schubert 2004, p. 5429 (Jockenhovel 2009, Jockenhovel 2009, Minnemann 2008)</b> | Primary or secondary hypogonadism                                   | 30 wk | IM TU, 1000 mg/9 wk (20)<br>IM TE, 250 mg/3 wk (20)                                   | 41.1 (13.4)<br>36.3 (12.3)                             | 3.9 (4.4)<br>2.7 (2.3)                           | Mix |
| <b>Shabsigh 2004, p. 658 (Burnett 2013, Wang 2001, Swerdloff 2000)</b>             | Erectile dysfunction not responsive to sildenafil                   | 12 wk | Placebo (36)<br>1% gel, 50 mg/d (39)                                                  | 59.1 (9.4)<br>56.8 (10.2)                              | 65% had T < 10.4 (NR by group)                   | Yes |
| <b>Boyanov 2003, p. 1</b>                                                          | T2DM, obesity, and "symptoms of andropause or erectile dysfunction" | 3 mo  | No treatment (24)<br>Oral TU, 120 mg/d (24)                                           | All: 57.5 (4.8) (NR by group)                          | 10.76 (11.20)<br>9.56 (2.33)                     | NR  |
| <b>McNicholas 2003, p. 69</b>                                                      | ≥ 1 symptoms of "low T"                                             | 90 d  | Patch, 5 mg/d (68)<br>1% gel, 50 mg/d (68)<br>1% gel, 100 mg/d (72)                   | 57.9 (10.2)<br>59.0 (9.5)<br>56.7 (10.3)               | 7.90 (2.2)<br>7.95 (2.2)<br>7.92 (2.4)           | Yes |
| <b>Steidle 2003, p. 2673 (Seftel 2004)</b>                                         | ≥ 1 symptoms of "low T"                                             | 90 d  | Placebo (99)<br>Patch, 5 mg/d (102)<br>1% gel, 50 mg/d (99)<br>1% gel, 100 mg/d (106) | 56.8 (10.8)<br>60.5 (9.7)<br>58.1 (9.7)<br>56.8 (10.6) | 7.9 (2.8)<br>8.3 (2.4)<br>8.1 (2.0)<br>8.1 (2.1) | Yes |
| <b>Tan 2003, p. 13</b>                                                             | Alzheimer's disease                                                 | 12 mo | Placebo (5)<br>IM TE, 200mg/2wk (5)                                                   | 68.9 (NR)<br>72.4 (NR)                                 | NR<br>3.6 (NR)                                   | No  |
| <b>Ferrando 2002, p. 358 (Ferrando 2003)</b>                                       | "Healthy older men"                                                 | 6 mo  | Placebo (5)<br>IM TE 50–400 mg/wk (7)                                                 | 67 (6.7)<br>68 (7.9)                                   | 9.8 (4.3)<br>12.4 (4.4)                          | No  |
| <b>Kang 2002, p. 862</b>                                                           | Coronary artery disease                                             | 12 wk | Placebo (17)<br>Oral TU, 160 mg/d (18)                                                | 58 (9)<br>57 (7)                                       | Free T,<br>13.8 (1.8) pg/ml<br>9.9 (3.1) pg/ml   | NR  |
| <b>Simon 2001, p. 2149</b>                                                         | Healthy adult                                                       | 3 mo  | Placebo (6)                                                                           | 55.4 (3.6)                                             | 9.4 (1.0)                                        | NR  |

|                                                                   |                                          |       |                                                                           |                                           |                                     |     |
|-------------------------------------------------------------------|------------------------------------------|-------|---------------------------------------------------------------------------|-------------------------------------------|-------------------------------------|-----|
|                                                                   | men                                      |       | Gel, 125 mg/d (6)                                                         | 52.8 (4.2)                                | 8.3 (0.3)                           |     |
| <b>Bhasin 2000, p. 763</b>                                        | HIV-infected with weight loss            | 16 wk | Placebo (14)<br>IM TE, 100 mg/wk (17)                                     | 41.8 (9.4)<br>40.8 (4.9)                  | 6.1 (2.9)<br>7.1 (3.0)              | No  |
| <b>Wang 2000, p. 2839</b>                                         | Primary, secondary or LOH                | 90 d  | Patch, 5 mg/d (76)<br>1% gel, 50 mg/d (76)<br>1% gel, 100 mg/d (78)       | 51.1 (NR)<br>51.3 (NR)<br>51.0 (NR)       | 8.2 (4.8)<br>8.2 (4.6)<br>8.6 (4.8) | Mix |
| <b>Clague 1999, p. 261</b>                                        | Community-living                         | 3 mo  | Placebo (7)<br>IM TE, 200 mg/2wk (7)                                      | 65.3 (1.8)<br>68.1 (6.6)                  | 11.6 (0.9)<br>11.3 (1.7)            | No  |
| <b>Dobs 1999, p. 3469</b>                                         | Receiving TRT for at least 3 mo          | 24 wk | Patch, 5 mg/d (33)<br>IM TE, 200 mg/2wk (33)                              | 44.3 (11.1)<br>44.9 (11.6)                | 5.8 (2.7)<br>6.3 (3.3)              | Mix |
| <b>Bhasin 1998, p. 3155 (Arver 1999)</b>                          | HIV                                      | 12 wk | Placebo (21)<br>Patch, 5 mg/d (20)                                        | NR                                        | 7.3 (2.9)<br>9.0 (1.7)              | Mix |
| <b>Grinspoon 1998, p. 18 (Grinspoon 2000)</b>                     | AIDS wasting syndrome                    | 6 mo  | Placebo (26)<br>IM TE, 300 mg/3wk (26)                                    | 44 (9)<br>40 (7)                          | 10.1 (6.4)<br>11.3 (5.4)            | No  |
| <b>Jockenhovel 1997, p. 2510</b>                                  | Primary or secondary androgen deficiency | 12 wk | IM TE, 250 mg/3 wk (10)<br>Pellets, 1200 mg (12)                          | 30.0 (7.3)<br>36.3 (11.1)                 | 1.6 (1.3)<br>1.9 (1.1)              | NR  |
| <b>Jockenhovel 1997, p. 293 (Jockenhovel 1999, Schubert 2001)</b> | Primary or secondary androgen deficiency | 210 d | Oral TU, 160 mg/d (13)<br>IM TE, 250 mg/3wk (15)<br>Pellets, 1200 mg (15) | 34.5 (14.1)<br>31.8 (10.1)<br>35.8 (10.4) | 2.9 (1.4)<br>2.3 (2.3)<br>2.7 (1.5) | NR  |
| <b>Sih 1997, p. 1661</b>                                          | Community-dwelling healthy men           | 12 mo | Placebo (15)<br>IM TC, 200 mg/2wk (17)                                    | 68 (6)<br>65 (7)                          | 8.1 (0.7)<br>10.2 (0.9)             | NR  |

Note: ADAM = Androgen Deficiency of the Aging Male, AMS = Aging Males' Symptoms [scale], CI = confidence interval, IM = intramuscular, IQR = interquartile range, LOH = late onset hypogonadism, MetS = metabolic syndrome, NR = not reported, SD = standard deviation, T = testosterone, T1D = type 1 diabetes, T2DM = type 2 diabetes mellitus, TC = testosterone cypionate, TE = testosterone enanthate, TRT = testosterone replacement therapy, TU = testosterone undecanoate.

\*All RCTs involved men that were either described as hypogonadal and met the cut-off for hypogonadism (total T < 12 nmol/L or free T < 225 pmol/L) or reported total or free T below these cut-off points.

†The Testosterone Trials were a coordinated set of seven trials. In order to enroll, participants had to qualify for at least one of the Sexual Function Trial, Physical Function Trial, or the Vitality Trial (NCT00799617).

‡Blend of testosterone propionate, testosterone phenylpropionate, testosterone isocaproate, and testosterone decanoate.

eTable 2: Characteristics of included non-randomized studies that reported at least one outcome of interest

| Study                             | Population*                                                                    | Duration                                   | Group<br>(no. in group)                                                                                                | Age, yr, mean<br>(SD)                    | Baseline total T,<br>mean (SD), nmol/L† | Industry<br>funding |
|-----------------------------------|--------------------------------------------------------------------------------|--------------------------------------------|------------------------------------------------------------------------------------------------------------------------|------------------------------------------|-----------------------------------------|---------------------|
| <b>Retrospective cohort</b>       |                                                                                |                                            |                                                                                                                        |                                          |                                         |                     |
| <b>Cheetham<br/>2017, p. 491</b>  | ≥ 40 yr with documented<br>androgen deficiency                                 | Follow-up: 4.4<br>years (mean)             | TRT (injection, oral, topical), dose NR<br>(8,808)<br>Never TRT (35,527)                                               | 58.4 (NR)<br>59.8 (NR)                   | TRT group: 7.4<br>(IQR 5.5-8.8)**       | No                  |
| <b>Layton 2015,<br/>p. 1187</b>   | New users of TRT‡                                                              |                                            | Gel (114,918)<br>Injection (111,354)<br>Patch (9,906)                                                                  | Range: 52.4 (15.1)<br>to 72.7 (6.7)§     | NR††                                    | No                  |
| <b>Pastuszak<br/>2015, p. 165</b> | New TRT users or had<br>been off TRT for ≥ 3 or<br>mo                          | 26.2 (10.6)<br>29.8 (8.8)<br>28.2 (8.6) mo | Gel (1% 50–100 mg/d and 1.62%<br>20.25–80.1 mg/d) (47)<br>IM TE or TC, 100–200mg/wk (57)<br>Pellets, 75 mg/3–6 mo (74) | 54.1 (9.8)<br>42.5 (12.3)<br>53.8 (13.0) | 10.4 (3.1)<br>10.6 (5.7)<br>9.3 (5.8)   | No                  |
| <b>Ramasamy<br/>2016</b>          | ≥ 65 yr and ≥3<br>hypogonadal symptoms                                         | 3.4-3.8 yr                                 | TRT, dose NR (153)<br>No treatment (64)                                                                                | 74 (6.3)<br>75(6)                        | NR                                      | NR                  |
| <b>Aydogdu<br/>2013, p. 243</b>   | IHH                                                                            | 24 wk                                      | Sustanon, ¶ IM 250 mg/3wk (28)<br>1% gel, 50 mg/d (24)                                                                 | 20.9 (1.4)<br>21.3 (1.6)                 | 0.9 (0.6)<br>1.4 (1.3)                  | No                  |
| <b>Vigen 2013,<br/>p. 1829</b>    | Men who underwent<br>coronary angiography at a<br>VA medical centre            | Follow-up: 840<br>d (mean)                 | TRT, dose NR (1223)<br>No treatment (7486)                                                                             | 60.6 (7.6)<br>63.8 (9.0 yr)              | 6.1 (2.2)<br>7.2 (2.6)                  | NR                  |
| <b>Shores 2012,<br/>p. 2050</b>   | > 40 yr treated at a VA<br>medical center                                      | 20.2 (16.7) mo                             | TRT, dose NR (398)<br>No treatment (633)                                                                               | 62.1 (10.6)                              | 5.6 (2.2)<br>6.7 (1.9)                  | No                  |
| <b>Rhoden 2006,<br/>p. 201</b>    | Hypogonadal men with<br>negative prostate biopsy<br>prior to initiation of TRT | 12 mo                                      | IM TRT, dose NR (33)<br>1% gel, dose NR (25)                                                                           | 58.3                                     | 10.3 (5.4)<br>10.2 (3.1)                | No                  |
| <b>Guay 2000,<br/>p. 132</b>      | Men with ED and<br>primary or secondary<br>hypogonadism                        | 2-3 mo                                     | IM TE, 200–300 mg/2-3 wk (25)<br>Patch, 5 mg/d (16)                                                                    | 40–80                                    | Free T:<br>8.1–9.7 pg/ml                | NR                  |
| <b>Hajjar 1997,<br/>p. 3793</b>   | Elderly men                                                                    | 24 mo                                      | IM TE or TC, IM 200 mg/2 wk (45)<br>No treatment (27)                                                                  | 71.8 (SE 1.7)<br>69.9 (SE 1.9)           | 10.8 (4.7)<br>9.6 (3.8)                 | NR                  |
| <b>Prospective cohort</b>         |                                                                                |                                            |                                                                                                                        |                                          |                                         |                     |
| <b>Debruyne</b>                   | ≥18 years with a                                                               | 36 mo                                      | TRT, dose NR (750)                                                                                                     | 58.9 (10.3)                              | 8.3 (3.9)                               | Yes                 |

Supplemental Online Content: Elliott et al. Testosterone therapy in hypogonadal men:  
a systematic review and network meta-analysis.

|                                                  |                                                                  |             |                                                                               |                            |                                           |     |
|--------------------------------------------------|------------------------------------------------------------------|-------------|-------------------------------------------------------------------------------|----------------------------|-------------------------------------------|-----|
| <b>2017, p. 216</b>                              | diagnosis of hypogonadism                                        |             | No TRT (249)                                                                  | 59.7 (11.1)                | 9.4 (3.7)                                 |     |
| <b>Traish 2016, p. 1</b>                         | Symptoms of hypogonadism                                         | Up to 8 yr  | IM TU, 1000 mg/12wk (360)<br>No TRT (296)                                     | 57.4 (7.3)<br>64.8 (4.3)   | 9.8 (1.3)<br>9.6 (1.2)                    | Yes |
| <b>Yassin 2017, p. 1</b>                         | Treated or untreated hypogonadal men                             | 6 yr        | TRT, dose NR (42)<br>No treatment (162)                                       | 61.3 (4.7)                 | ≤ 12.1<br>7.1 (2.3)                       | NR  |
| <b>Jung 2016, p. 194</b>                         | Symptoms of hypogonadism                                         | 8 mo        | TU, 1000 mg/3 mo + lifestyle modification (54)<br>Lifestyle modification (52) | 56.7 (12.6)<br>57.8 (11.4) | 8.7 (2.1)<br>9 (2.4)                      | No  |
| <b>Francomano 2014, p. 401</b>                   | Severely obese men (mean BMI 42) with ≥ symptoms of hypogonadism | 54 wk       | DPE (12)<br>DPE + IM TU, 1000 mg/12 wk (12)                                   | 53 (8)<br>56 (9)           | 8.2 (1.8)<br>8.5 (1.8)                    | NR  |
| <b>Blick 2013, p. 30</b>                         | HIV/AIDS                                                         | 12 mo       | 1% gel (Androgel), 50 mg/d (92)<br>1% gel (Testim), 50 mg/d (75)              | 49.5 (8.1)                 | 13.9 (5.5)††<br>13.7 (7.2)                | Yes |
| <b>Aversa 2012, p. 96</b>                        | Middle-aged men with LOH and MetS                                | 36 mo       | IM TU, 1000 mg/12 wk (40)<br>No treatment (20)                                | 58 (10)<br>57 (8)          | 8.3 (2.4)                                 | NR  |
| <b>Dean 2005, p. 87</b>                          | 21–81 yr                                                         | Up to 12 mo | 1% gel, 50 mg/d (NR)<br>1% gel, 100 mg/d (NR)                                 | 58.5 (10.0)                | 8.1 (2.1)                                 | NR  |
| <b>Wang 2004, p. 2085 (Swerdloff 2003 p.207)</b> | 19–68 yr                                                         | 36 mo       | 1% gel, 50 mg/d (NR)<br>1% gel, 75 mg/d (NR)<br>1% gel, 100 mg/d (NR)         | 51.5 (0.9)                 | 14.1 (1.3) ¶¶<br>22.4 (2.7)<br>25.6 (2.4) | No  |

Note: DPE = diet plus exercise, ED = erectile dysfunction, IHH = idiopathic hypogonadotropic hypogonadism, IM = intramuscular, IQR = interquartile range, LOH = late-onset hypogonadism, MetS = metabolic syndrome, NR = not reported, SE = standard error, SD = standard deviation, T = testosterone, TC = testosterone cypionate, TE = testosterone enanthate, TRT = testosterone replacement therapy, VA = Veterans Affairs.

\*All studies involved men that were either described as hypogonadal and met the cut-off for hypogonadism (total T < 12 nmol/L or free T < 225 pmol/L) or reported total or free T below these cut-off points.

†Unless otherwise stated.

‡Full cohort includes patients with testosterone levels in the normal range; data extracted only for patients with total testosterone < 300 ng/dl (10.4 nmol/L).

¶Blend of testosterone propionate, testosterone phenylpropionate, testosterone isocaproate, and testosterone decanoate.

§Data provided separately for 3 databases. Range represents the high and low ages (SD) across the three databases.

\*\*Baseline testosterone level not reported for the never-TRT group. In both the TRT group and the no TRT group, 98%–99% of patients were reported to have total T < 10.4 nmol/L at baseline.

††Mean total testosterone level not provide among patients with a “low” testosterone level (< 10.4 nmol/L).

‡‡Study eligibility was total T < 300 ng/dl or free T < 50 pg/ml.

¶¶Long term extension of an included RCT (Wang 2000). Total testosterone levels reported here are after 6 months of TRT treatment in the RCT.

**eTable 3: Risk of bias of included randomized controlled trials that reported at least one outcome of interest**

| <b>Author, year</b>          | <b>Adequate sequence generation</b> | <b>Allocation concealment</b> | <b>Blinding of outcome assessment (objective outcomes)</b> | <b>Blinding of outcome assessment (subjective outcomes)</b> | <b>Incomplete outcome data addressed (efficacy outcomes)</b> | <b>Incomplete outcome data addressed (harm outcomes)</b> |
|------------------------------|-------------------------------------|-------------------------------|------------------------------------------------------------|-------------------------------------------------------------|--------------------------------------------------------------|----------------------------------------------------------|
| <b>Dias 2016</b>             | Low                                 | Unclear                       | Low                                                        | Low                                                         | High                                                         | Unclear                                                  |
| <b>Chillarón 2016</b>        | Unclear                             | Low                           | Low                                                        | Unclear                                                     | Low                                                          | Low                                                      |
| <b>Brock 2016</b>            | Low                                 | Low                           | Low                                                        | Low                                                         | Low                                                          | Low                                                      |
| <b>Dhindsa 2016</b>          | Unclear                             | Unclear                       | Low                                                        | Unclear                                                     | High                                                         | Unclear                                                  |
| <b>Konaka 2016</b>           | Low                                 | Unclear                       | Low                                                        | High                                                        | High                                                         | Unclear                                                  |
| <b>Magnussen 2016</b>        | Low                                 | Low                           | Low                                                        | Low                                                         | Low                                                          | Low                                                      |
| <b>Ng Tang Fui 2016</b>      | Low                                 | Low                           | Low                                                        | Low                                                         | High                                                         | Unclear                                                  |
| <b>Sinclair 2016</b>         | Unclear                             | Low                           | Low                                                        | Low                                                         | High                                                         | High                                                     |
| <b>Snyder 2016</b>           | Low                                 | Low                           | Low                                                        | Low                                                         | Low                                                          | Low                                                      |
| <b>Basaria 2015, p. 570</b>  | Unclear                             | Unclear                       | Low                                                        | Low                                                         | High                                                         | Unclear                                                  |
| <b>Basaria 2015, p. 280</b>  | Low                                 | Unclear                       | Low                                                        | Low                                                         | High                                                         | Unclear                                                  |
| <b>Cherrier 2015</b>         | Unclear                             | Unclear                       | Low                                                        | Unclear                                                     | Low                                                          | Low                                                      |
| <b>Paduch 2015</b>           | Low                                 | Low                           | Low                                                        | Unclear                                                     | Low                                                          | Low                                                      |
| <b>Gianatti 2014</b>         | Unclear                             | Low                           | Low                                                        | Low                                                         | Low                                                          | Low                                                      |
| <b>Borst 2014</b>            | Low                                 | Unclear                       | Low                                                        | High                                                        | High                                                         | High                                                     |
| <b>Hackett 2013</b>          | Unclear                             | Low                           | Low                                                        | Low                                                         | Low                                                          | Low                                                      |
| <b>Wang 2013</b>             | Unclear                             | Unclear                       | Low                                                        | NA                                                          | Low                                                          | High                                                     |
| <b>Behre 2012</b>            | Low                                 | Low                           | Low                                                        | Low                                                         | Low                                                          | High                                                     |
| <b>Spitzer 2012</b>          | Unclear                             | Low                           | Low                                                        | Low                                                         | Low                                                          | Low                                                      |
| <b>Stout 2012</b>            | Unclear                             | Unclear                       | NA                                                         | Low                                                         | High                                                         | High                                                     |
| <b>Zhang 2012</b>            | Unclear                             | Low                           | Low                                                        | High                                                        | Low                                                          | Low                                                      |
| <b>Ho 2011</b>               | Unclear                             | Low                           | Low                                                        | Low                                                         | Low                                                          | Low                                                      |
| <b>Jones 2011</b>            | Unclear                             | Unclear                       | Low                                                        | Low                                                         | High                                                         | High                                                     |
| <b>Kaufman 2011</b>          | Unclear                             | Low                           | Low                                                        | Low                                                         | High                                                         | Low                                                      |
| <b>Sheffield-Moore 2011</b>  | Unclear                             | Low                           | Low                                                        | NA                                                          | Low                                                          | High                                                     |
| <b>Shigehara 2011</b>        | Unclear                             | Unclear                       | Low                                                        | High                                                        | Low                                                          | Low                                                      |
| <b>Aversa 2010, p. 776</b>   | Unclear                             | Unclear                       | Low                                                        | Low                                                         | Unclear                                                      | Unclear                                                  |
| <b>Aversa 2010, p. 3495</b>  | Unclear                             | Unclear                       | Low                                                        | Low                                                         | Low                                                          | Low                                                      |
| <b>Basaria 2010</b>          | Low                                 | Low                           | Low                                                        | Low                                                         | Low                                                          | Unclear                                                  |
| <b>Kalinchenko 2010</b>      | Unclear                             | Low                           | Low                                                        | Low                                                         | Low                                                          | Low                                                      |
| <b>Kenny 2010</b>            | Unclear                             | Low                           | Low                                                        | Low                                                         | High                                                         | Unclear                                                  |
| <b>Srinivas-Shankar 2010</b> | Low                                 | Low                           | Low                                                        | Low                                                         | Low                                                          | Unclear                                                  |
| <b>Caminiti 2009</b>         | Unclear                             | Low                           | Low                                                        | Low                                                         | Low                                                          | Low                                                      |
| <b>Chiang 2009</b>           | Unclear                             | Unclear                       | Low                                                        | Low                                                         | High                                                         | High                                                     |

|                                                                                                                                                                                                         |         |         |         |         |         |         |
|---------------------------------------------------------------------------------------------------------------------------------------------------------------------------------------------------------|---------|---------|---------|---------|---------|---------|
| <b>Emmelot-Vonk 2009</b>                                                                                                                                                                                | Low     | Low     | Low     | Low     | Low     | Low     |
| <b>Heufelder 2009</b>                                                                                                                                                                                   | Low     | Unclear | Low     | High    | Low     | Low     |
| <b>Hohl 2009</b>                                                                                                                                                                                        | High    | High    | Low     | High    | Low     | Low     |
| <b>Mathur 2009</b>                                                                                                                                                                                      | Low     | Unclear | Low     | Low     | Low     | High    |
| <b>Morales 2009</b>                                                                                                                                                                                     | Low     | Low     | Low     | Low     | Low     | Low     |
| <b>Shores 2009</b>                                                                                                                                                                                      | Low     | Low     | Low     | Low     | High    | Unclear |
| <b>Agledahl 2008</b>                                                                                                                                                                                    | Unclear | Unclear | Low     | NA      | Low     | Low     |
| <b>Basurto 2008</b>                                                                                                                                                                                     | Low     | Low     | Low     | Low     | Low     | Unclear |
| <b>Raynaud 2008</b>                                                                                                                                                                                     | Unclear | Unclear | Low     | High    | High    | High    |
| <b>Svartberg 2008</b>                                                                                                                                                                                   | Unclear | Unclear | Low     | Low     | Low     | Unclear |
| <b>Chiang 2007</b>                                                                                                                                                                                      | Unclear | Unclear | Low     | Unclear | High    | Low     |
| <b>Brockenbrough 2006</b>                                                                                                                                                                               | Unclear | Low     | Low     | Unclear | High    | Low     |
| <b>Marks 2006</b>                                                                                                                                                                                       | Unclear | Unclear | Low     | Low     | Low     | Low     |
| <b>Merza 2005</b>                                                                                                                                                                                       | Unclear | Unclear | Low     | Unclear | Low     | Low     |
| <b>Kuhnert 2005</b>                                                                                                                                                                                     | Unclear | Low     | Low     | High    | High    | High    |
| <b>Orengo 2005</b>                                                                                                                                                                                      | Low     | Unclear | Low     | Unclear | High    | High    |
| <b>Amory 2004</b>                                                                                                                                                                                       | Low     | Low     | Low     | Low     | Unclear | Unclear |
| <b>Cavallini 2004</b>                                                                                                                                                                                   | Unclear | Unclear | Low     | Unclear | Unclear | High    |
| <b>Schubert 2004</b>                                                                                                                                                                                    | Low     | Unclear | Low     | High    | Unclear | Low     |
| <b>Shabsigh 2004</b>                                                                                                                                                                                    | Low     | Unclear | Low     | Low     | Low     | Unclear |
| <b>Boyanov 2003</b>                                                                                                                                                                                     | Unclear | Unclear | Low     | High    | Low     | Low     |
| <b>McNicholas 2003</b>                                                                                                                                                                                  | Unclear | Unclear | Low     | High    | High    | High    |
| <b>Steidle 2003</b>                                                                                                                                                                                     | Unclear | Unclear | Low     | High    | High    | High    |
| <b>Tan 2003</b>                                                                                                                                                                                         | Unclear | Unclear | Unclear | High    | Low     | Low     |
| <b>Ferrando 2002</b>                                                                                                                                                                                    | Unclear | Unclear | Low     | NA      | Low     | Low     |
| <b>Kang 2002</b>                                                                                                                                                                                        | Unclear | Unclear | Low     | NA      | Low     | Low     |
| <b>Simon 2001</b>                                                                                                                                                                                       | Unclear | Unclear | Low     | Low     | NA      | Low     |
| <b>Bhasin 2000</b>                                                                                                                                                                                      | Low     | Unclear | Low     | Unclear | Low     | Unclear |
| <b>Wang 2000</b>                                                                                                                                                                                        | Unclear | Unclear | Low     | High    | High    | High    |
| <b>Clague 1999</b>                                                                                                                                                                                      | Unclear | Unclear | Low     | NA      | Low     | Low     |
| <b>Dobs 1999</b>                                                                                                                                                                                        | Unclear | Low     | Low     | High    | High    | Unclear |
| <b>Bhasin 1998</b>                                                                                                                                                                                      | Unclear | Unclear | Low     | Unclear | High    | Unclear |
| <b>Grinspoon 1998</b>                                                                                                                                                                                   | Low     | Low     | Low     | Low     | High    | Unclear |
| <b>Jockenhovel 1997, p. 2510</b>                                                                                                                                                                        | Unclear | Unclear | Low     | NA      | Unclear | Unclear |
| <b>Jockenhovel 1997, p. 293</b>                                                                                                                                                                         | Unclear | Unclear | Low     | NA      | Low     | Unclear |
| <b>Sih 1997</b>                                                                                                                                                                                         | Low     | Unclear | Low     | Unclear | High    | Unclear |
| Note: Risk of bias was not assessed for the studies that reported no outcomes of interest or that did not provide usable data (e.g., cross-over studies without first period data reported separately). |         |         |         |         |         |         |



**eTable 4: SIGN50 assessment of included non-randomized studies that reported at least one outcome of interest.** Overall assessment was based on consideration of all domains of the SIGN50 Methodology checklist for cohort studies.

| Study*                 | Overall assessment† | Comments                                                                                                                                                                                                                                                                                                                                                                                                                                                    |
|------------------------|---------------------|-------------------------------------------------------------------------------------------------------------------------------------------------------------------------------------------------------------------------------------------------------------------------------------------------------------------------------------------------------------------------------------------------------------------------------------------------------------|
| <b>Traish 2017</b>     | Unacceptable (–)    | Prospective cohort. Study “not designed or powered to address the effects of [TRT] on mortality in men with hypogonadism.” Control group comprised men who opted against TRT. Did not adjust for previous CV events, and groups were not balanced at baseline for some factors. Unclear from where participants were recruited and whether outcome assessment was blinded to exposure status. Outcomes assessed for up to 8 years.                          |
| <b>Jung 2016</b>       | Unacceptable (–)    | Prospective cohort. Did not report how study participants were assigned to treatment groups. Unblinded, with 8 month treatment and follow-up                                                                                                                                                                                                                                                                                                                |
| <b>Debruyne 2017</b>   | Acceptable (+)      | Prospective cohort. Multinational registry of treated or untreated newly diagnosed hypogonadal men. Follow-up on 93% of cohort over 3-yr period. Included a wide age range and multiple comorbidities but groups were not well balanced across all baseline characteristics. Men with a history of prostate cancer were excluded. Outcome assessment blinded to exposure status.                                                                            |
| <b>Layton 2015</b>     | Acceptable (+)      | Retrospective cohort. Comparative safety of TRT products grouped by route of administration (no comparison to non-users). Data unavailable for some patient characteristics. Study included a “large diverse patient sample representing men across age groups, populations, treatment and practice patterns, and health care systems.” Unclear whether outcome assessment was blinded to exposure status. Mean treatment duration between 96 and 122 days. |
| <b>Cheetham 2017</b>   | Acceptable (+)      | Retrospective cohort. Cohort entry determined by dispensation of a TRT product. Over 50% of cohort prescribed an intramuscular TRT. Possible confounding by indication, analysis could not adjust for all CV risk factors, and dose and duration of TRT were not considered. Unclear whether outcome assessment was blinded to exposure status. Length of follow up about 1 year longer for no TRT group.                                                   |
| <b>Yassin 2017</b>     | Unacceptable (–)    | Prospective registry. Investigation and biopsy frequency equal in both groups. Outcome assessment not blinded to exposure status. Percentage of cohort for whom data were available not reported. Confounding not considered.                                                                                                                                                                                                                               |
| <b>Pastuszak 2015</b>  | Unacceptable (–)    | Retrospective cohort. Considerable variation in baseline characteristics between groups, and confounding not considered. Outcome assessment not blinded to exposure status. 36 month follow-up.                                                                                                                                                                                                                                                             |
| <b>Ramasay 2015</b>    | Unacceptable (–)    | Retrospective cohort. “All major adverse cardiovascular events were verified by telephone with the patient (or family members if patient died).” Authors did not provide clear description and measurement about the outcomes. Median follow-up 3.8 (TRT) or 3.4 (no TRT) yr. Confounding not considered, and outcome assessment not blinded to exposure status.                                                                                            |
| <b>Francomano 2014</b> | Unacceptable (–)    | Prospective cohort. Obese men with low testosterone. Baseline characteristics were well matched on reported characteristics, but control group had contraindications to TRT. 33% dropout in treatment group, zero in control group; no comparison between those who dropped out or remained in study.                                                                                                                                                       |
| <b>Aydogdu</b>         | Acceptable (+)      | Retrospective cohort. Men with IHH. SAE not defined as an outcome but                                                                                                                                                                                                                                                                                                                                                                                       |

|                                                                                                                                                                                                                                                                                                                                                                                                                                                                                                                                                                                                                |                  |                                                                                                                                                                                                                                                                                                                                                                                                                           |
|----------------------------------------------------------------------------------------------------------------------------------------------------------------------------------------------------------------------------------------------------------------------------------------------------------------------------------------------------------------------------------------------------------------------------------------------------------------------------------------------------------------------------------------------------------------------------------------------------------------|------------------|---------------------------------------------------------------------------------------------------------------------------------------------------------------------------------------------------------------------------------------------------------------------------------------------------------------------------------------------------------------------------------------------------------------------------|
| <b>2013</b>                                                                                                                                                                                                                                                                                                                                                                                                                                                                                                                                                                                                    |                  | reported that no SAEs were detected for any treatment group.                                                                                                                                                                                                                                                                                                                                                              |
| <b>Blick 2013</b>                                                                                                                                                                                                                                                                                                                                                                                                                                                                                                                                                                                              | Acceptable (+)   | Prospective cohort. Groups were generally well matched on baseline characteristics with no statistically significant differences (except for study site). Patients in the 2 treatment groups were not followed for an equal length of time (AndroGel: mean 6.1 yr; Testim: mean 1.9 yr). Skin reactions assessed but not reported. Outcome assessment was not blinded to exposure status.                                 |
| <b>Vigen 2013</b>                                                                                                                                                                                                                                                                                                                                                                                                                                                                                                                                                                                              | Acceptable (+)   | Retrospective cohort. All-cause mortality was assessed via the Veterans Affairs vital status file. Myocardial infarction and ischemic stroke was assessed via ICD-9 codes from Veterans Affairs inpatient treatment files. Conclusions based on a composite outcome. Sufficient data not reported to allow analysis of stroke or MI separately at each time point. Outcome assessment was not blinded to exposure status. |
| <b>Aversa 2012</b>                                                                                                                                                                                                                                                                                                                                                                                                                                                                                                                                                                                             | Unacceptable (-) | Prospective cohort. Men with multiple sclerosis and late onset hypogonadism. Baseline characteristics were well matched; however, control group was comprised of men who had refused or had contraindications to testosterone. Adherence to treatment over 3 years was 50% in TU group.                                                                                                                                   |
| <b>Shores 2012</b>                                                                                                                                                                                                                                                                                                                                                                                                                                                                                                                                                                                             | Acceptable (+)   | Retrospective cohort. Hazard ratio for mortality took person-years of observation into account. Adjusted HR and CIs provided. Outcome assessment not blinded to exposure status. Exposure determined via Veterans Affairs pharmacy records and outcomes ascertained from 2 mortality databases.                                                                                                                           |
| <b>Rhoden 2006</b>                                                                                                                                                                                                                                                                                                                                                                                                                                                                                                                                                                                             | Acceptable (+)   | Retrospective cohort. Patients had to have negative prostate biopsy before initiation of TRT, thus excluding any men with pre-existing large volume disease. Type and dose of IM testosterone not reported. Dose of gel not reported (data NR by type). Outcome assessment not blinded to exposure status.                                                                                                                |
| <b>Dean 2005</b>                                                                                                                                                                                                                                                                                                                                                                                                                                                                                                                                                                                               | Unacceptable (-) | Prospective cohort. Poor reporting of the number of patients in each group and which group the safety events occurred in. Number of and reasons for withdrawals not reported. Safety data reported overall but not by treatment group. Outcome assessment not blinded to exposure status.                                                                                                                                 |
| <b>Wang 2004</b>                                                                                                                                                                                                                                                                                                                                                                                                                                                                                                                                                                                               | Unacceptable (-) | Prospective cohort (open-label extension of an RCT). The number of men assigned to each group NR. Safety data poorly reported: 3 cases of prostate cancer reported but number of people in each group not reported. Outcome assessment not blinded to exposure status.                                                                                                                                                    |
| <b>Guay 2000</b>                                                                                                                                                                                                                                                                                                                                                                                                                                                                                                                                                                                               | Unacceptable (-) | Retrospective cohort. Safety data not reported by treatment group. Outcome assessment not blinded to exposure status.                                                                                                                                                                                                                                                                                                     |
| <b>Hajjar 1997</b>                                                                                                                                                                                                                                                                                                                                                                                                                                                                                                                                                                                             | Unacceptable (-) | Retrospective cohort. Data not clearly provided. Safety outcomes were reported based on a subset of people assigned to each group, and it is not clear why the other patients were omitted. Outcome assessment not blinded to exposure status.                                                                                                                                                                            |
| <p>Note: CI = confidence interval, ICD-9 = International Classification of Diseases, Ninth Revision, IHH = idiopathic hypogonadotropic hypogonadism, HR = hazard ratio, MI = myocardial infarction, NR = not reported, RCT = randomized controlled trial, SAE = serious adverse events, TRT = testosterone replacement therapy, TU = testosterone undecanoate.</p> <p>*Non-randomized studies that reported at least 1 outcome of interest.</p> <p>†Assessed by use of SIGN50 for cohort studies (<a href="http://www.sign.ac.uk/checklists-and-notes.html">www.sign.ac.uk/checklists-and-notes.html</a>).</p> |                  |                                                                                                                                                                                                                                                                                                                                                                                                                           |

## eAppendix 5: Funnel plots for assessment of publication bias

### A) Quality of life

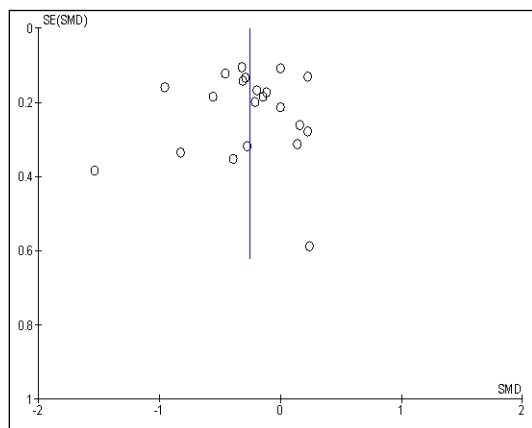

### B) Depression

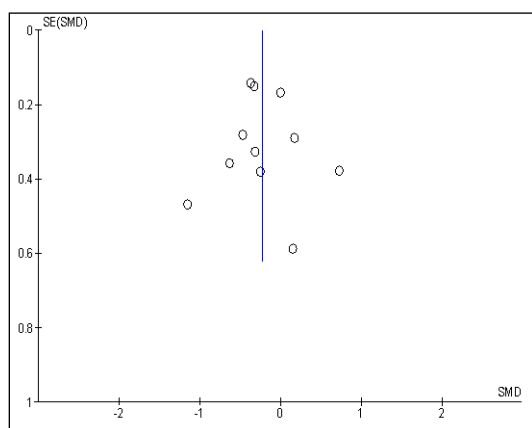

### C) Libido

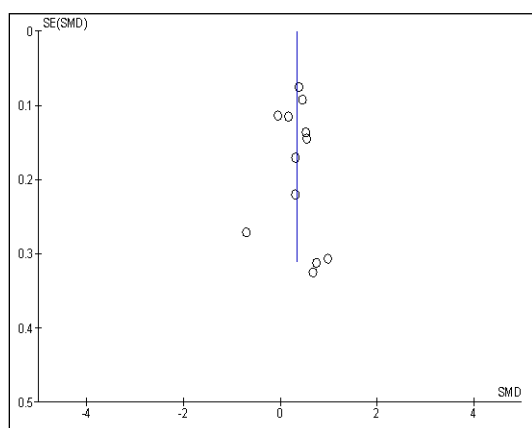

### D) Erectile function

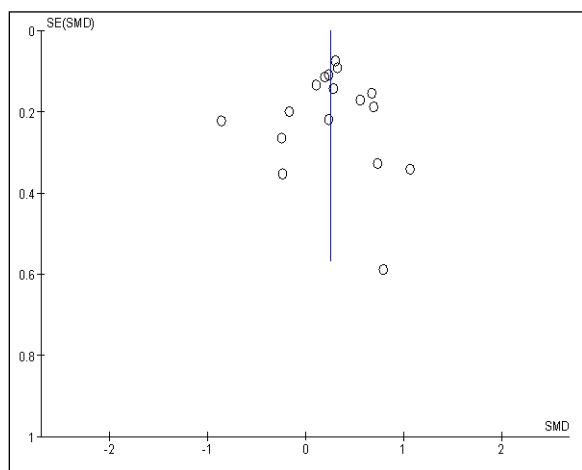

### E) Cardiovascular death

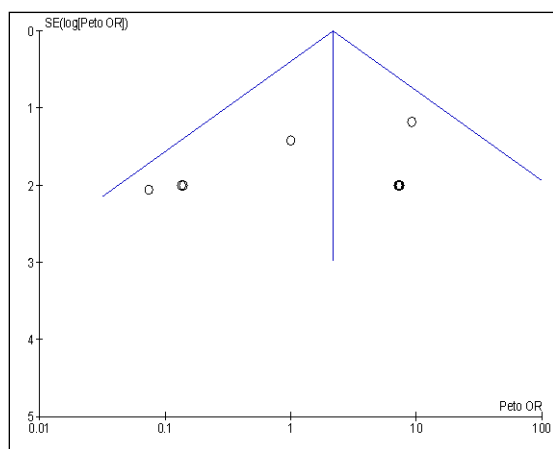

### F) Myocardial infarction

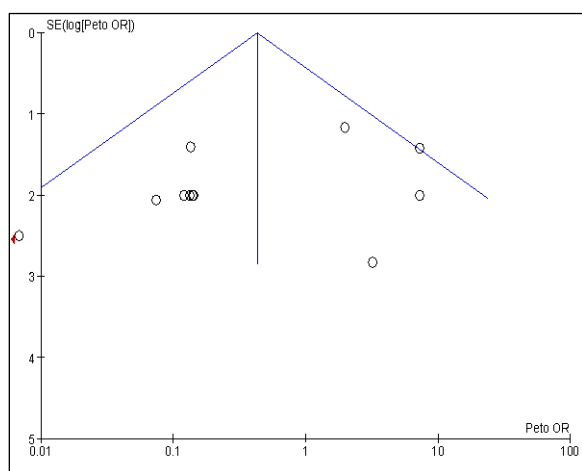

### G) Prostate cancer

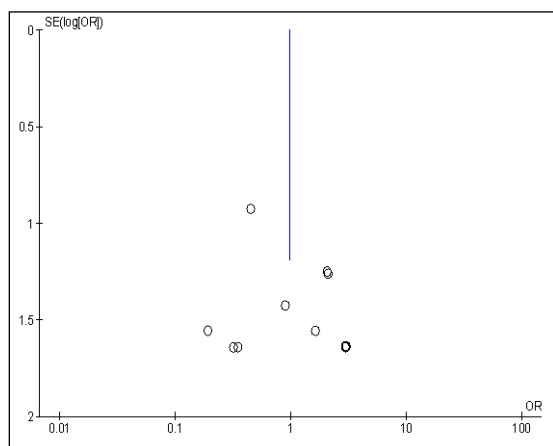

### H) Serious adverse events

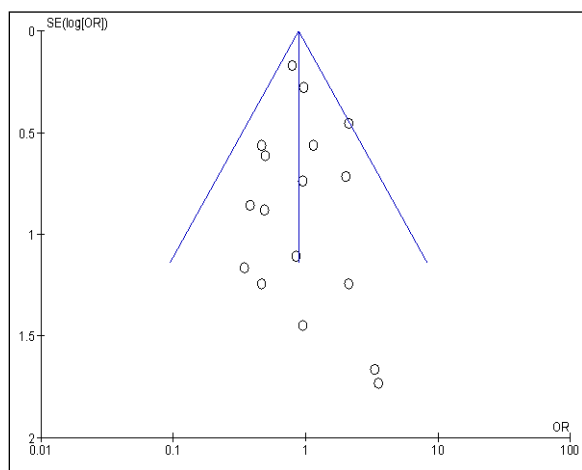

### I) Withdrawals due to adverse events

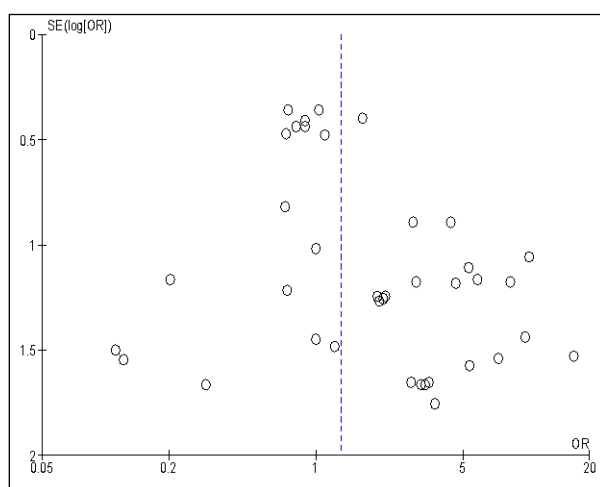

## eAppendix 6: Evaluation of network consistency

We evaluated the consistency of networks with closed loops. To be classified as a “closed loop,” at least 2 nodes had to be connected by more than one trial (e.g., not connected solely by a multi-arm trial).

To evaluate the consistency of networks with closed loops, two analyses were performed. One was conducted using the standard consistency model, which assumes that the data in the network are consistent. A second analysis was performed using an inconsistency model, which assumes that the data in the network are not consistent. The posterior mean deviance of the individual data points derived from the inconsistency model was plotted against the posterior mean deviance derived from the consistency model. If inconsistency is present, data points will lie under the diagonal line, indicating deviation from the consistency model. Data points above the diagonal line indicate deviation from the inconsistency model and are not indicative of inconsistency.

Model fit was also evaluated by considering the residual deviance and deviance information criterion (DIC) of the inconsistency and consistency models, with the model that has the lower residual deviance and DIC representing the better fit for the data. For each network, the consistency model had a lower residual deviance and DIC for each outcome, representing better model fit.

### LIBIDO: BASE CASE (ALL STUDIES)

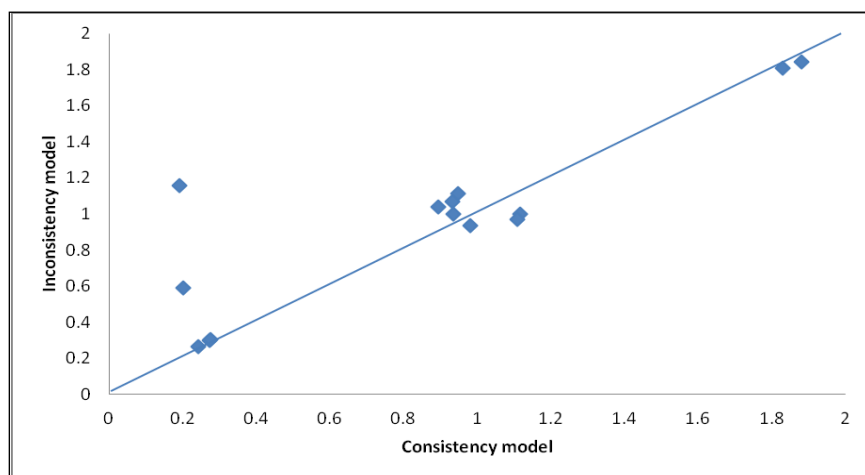

### TOTAL TESTOSTERONE LEVEL, 3 MO

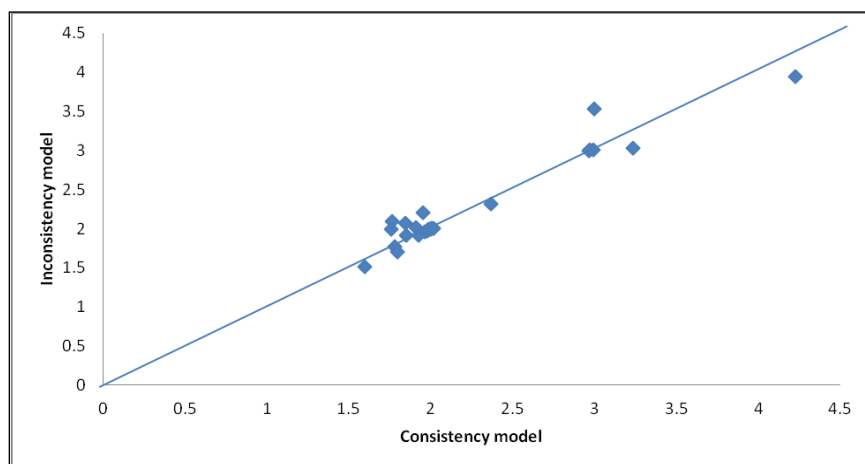

**TOTAL TESTOSTERONE LEVEL, 6 MO**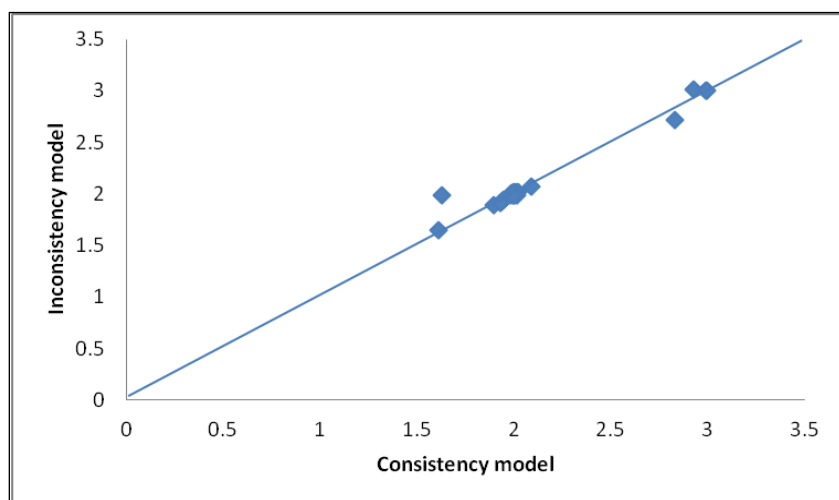**TOTAL TESTOSTERONE LEVEL, END OF STUDY**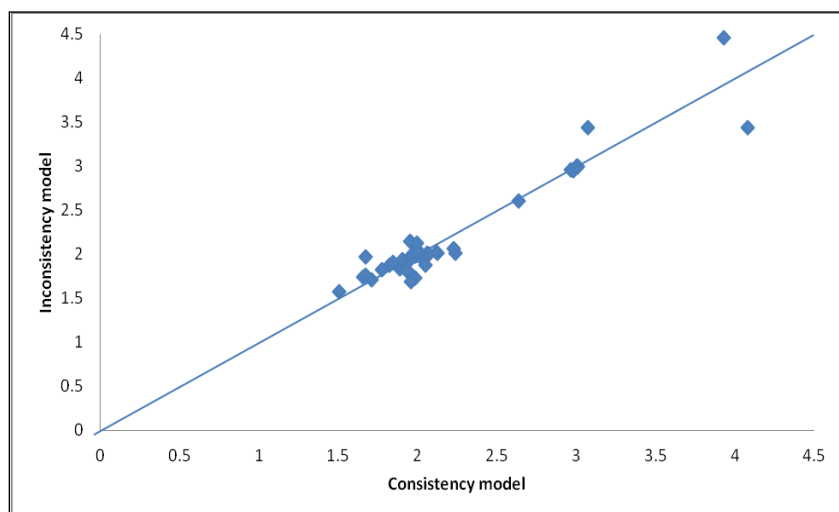

## eAppendix 7: Evidence networks

### Summary of network characteristics

| Outcome                          | No. of trials | No. of treatments* | No. of comparisons† | No. of participants | Treatment duration |
|----------------------------------|---------------|--------------------|---------------------|---------------------|--------------------|
| Quality of life                  | 23            | 14                 | 27                  | 3090                | 12 wk to 3 yr      |
| Depression                       | 12            | 9                  | 12                  | 852                 | 12 wk to 3 yr      |
| Libido                           | 14            | 10                 | 23                  | 3167                | 12 wk to 3 yr      |
| Erectile function                | 17            | 9                  | 19                  | 3165                | 12 wk to 3 yr      |
| Total testosterone, 3 mo         | 26            | 15                 | 39                  | 2739                | NA                 |
| Total testosterone, 6 mo         | 23            | 18                 | 29                  | 2908                | NA                 |
| Total testosterone, end of study | 57            | 28                 | 74                  | 5538                | 12 wk to 3 yr      |
| Serious AEs                      | 15            | 7                  | 15                  | 1860                | 12 to 3 yr         |
| Withdrawals due to AEs           | 27            | 16                 | 29                  | 4165                | 12 wk to 3 yr      |

Note: AE = adverse event.  
 \*In addition to placebo  
 †Direct comparisons based on the number of 2-, 3-, and 4-arm trials.

### eFigure 1A) Depression

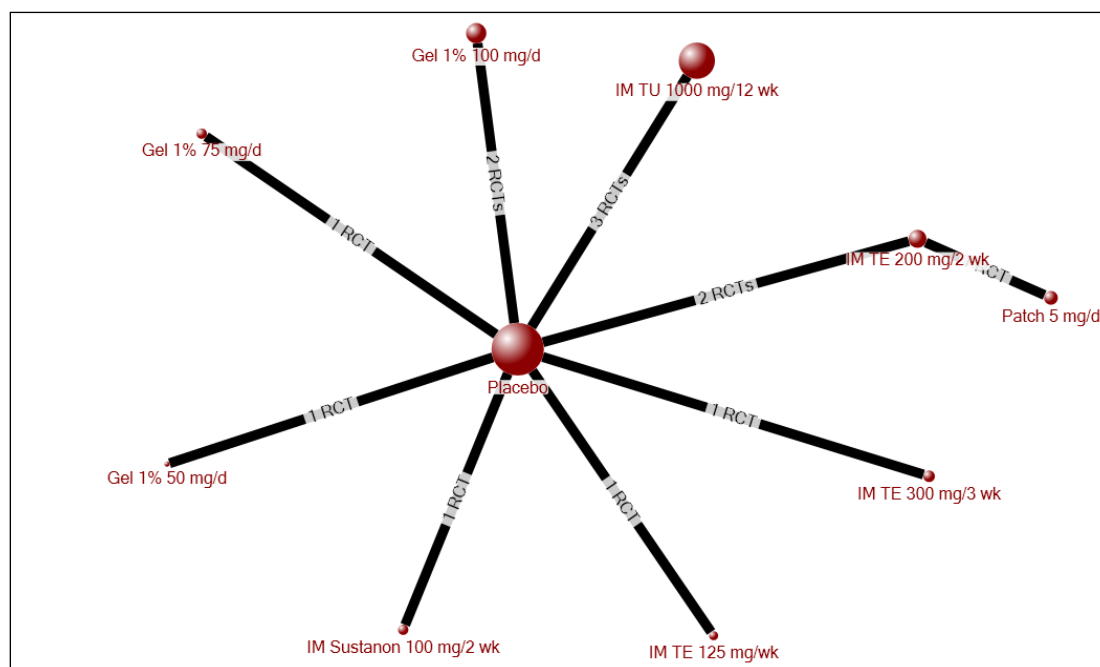



## B) Libido

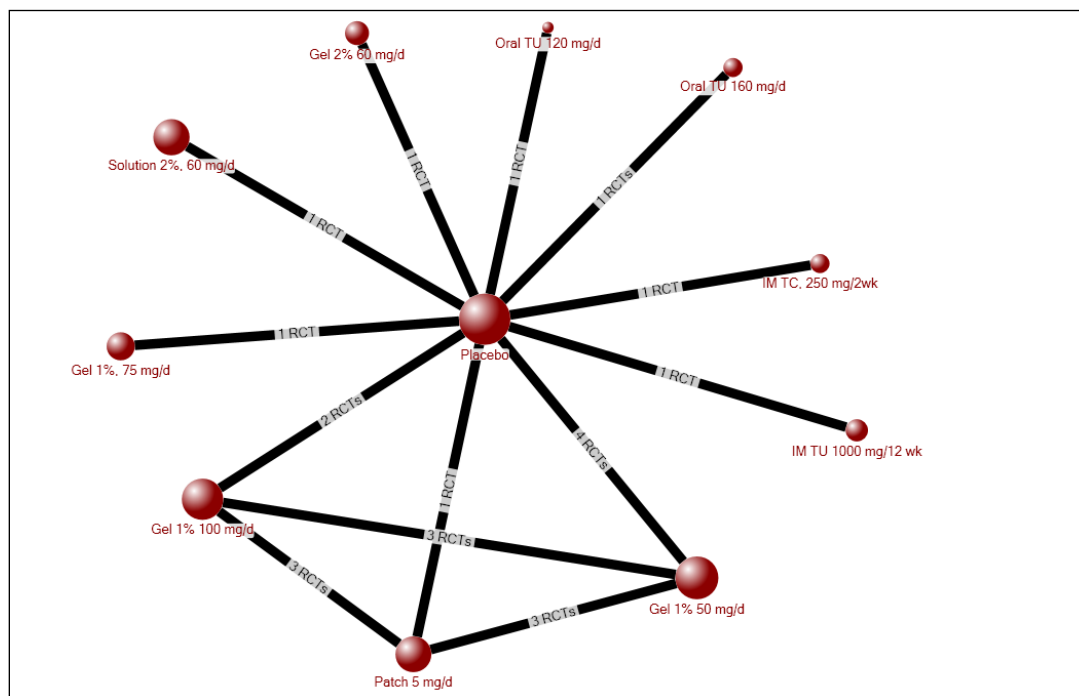

## C) Erectile function

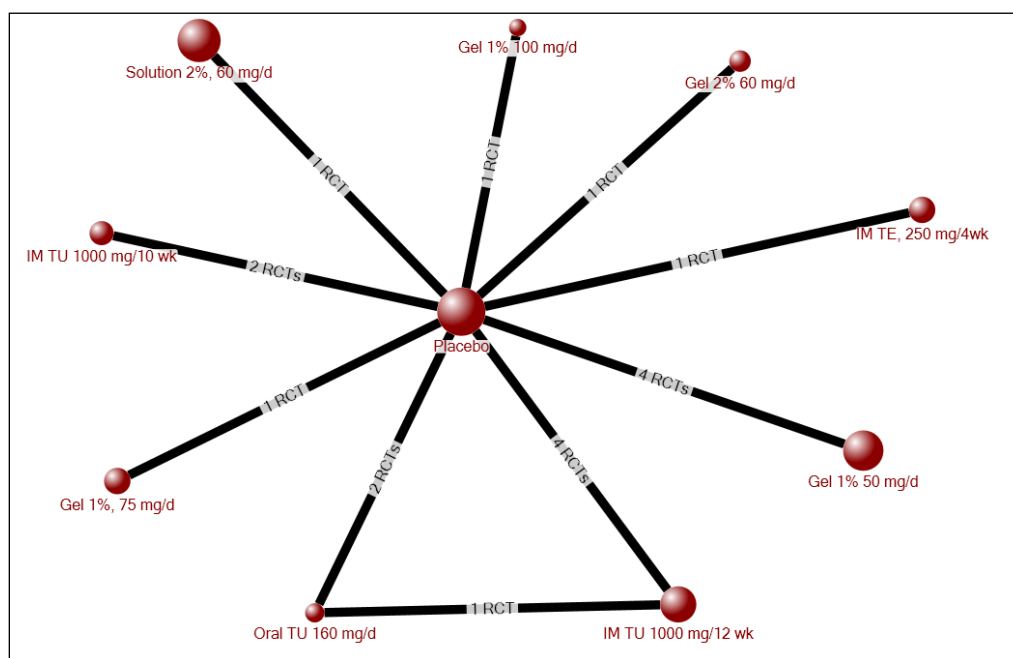

### D) Serious adverse events

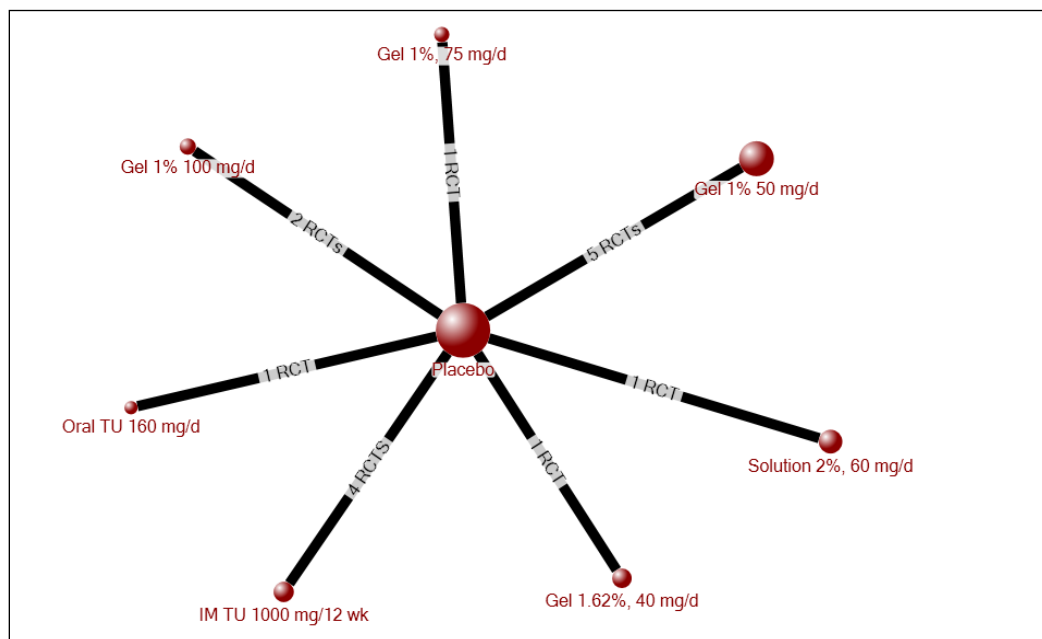

### E) Withdrawals due to adverse events

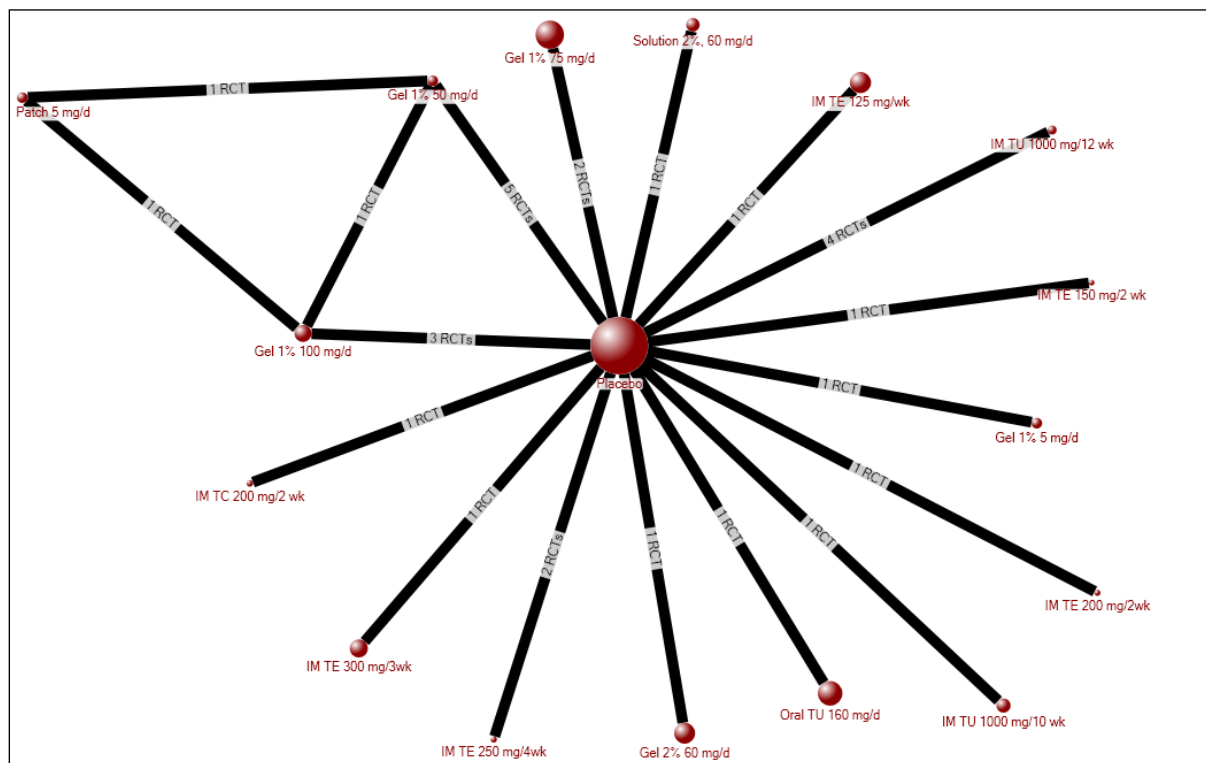

## eAppendix 8: Pair-wise meta-analyses and network meta-analyses

eFigure 2: Individual trial results, quality of life, among men without major comorbidities

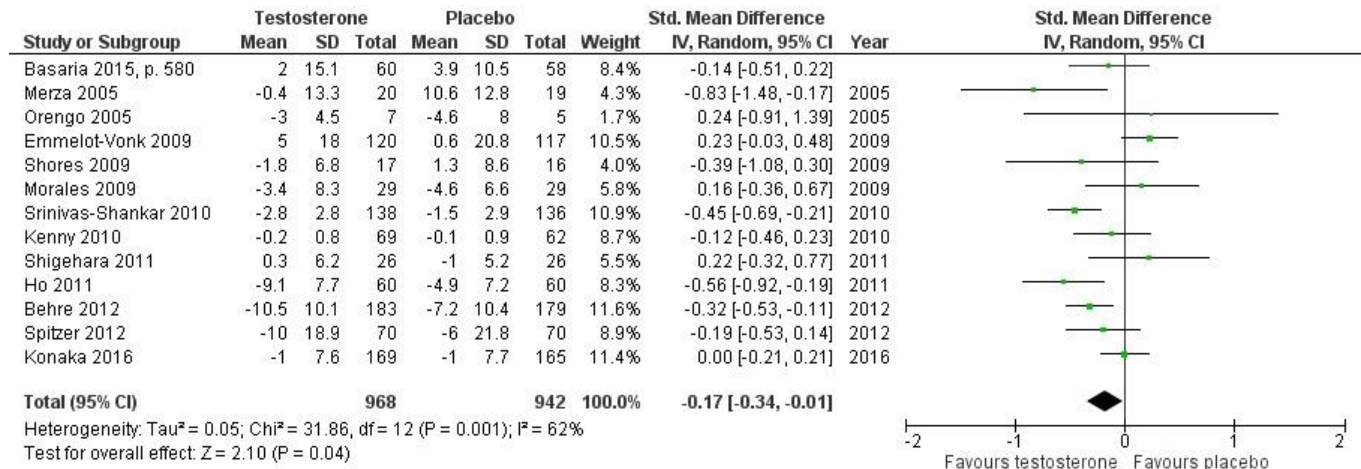

### eFigure 3: Individual trial results, depression

#### A) All trials

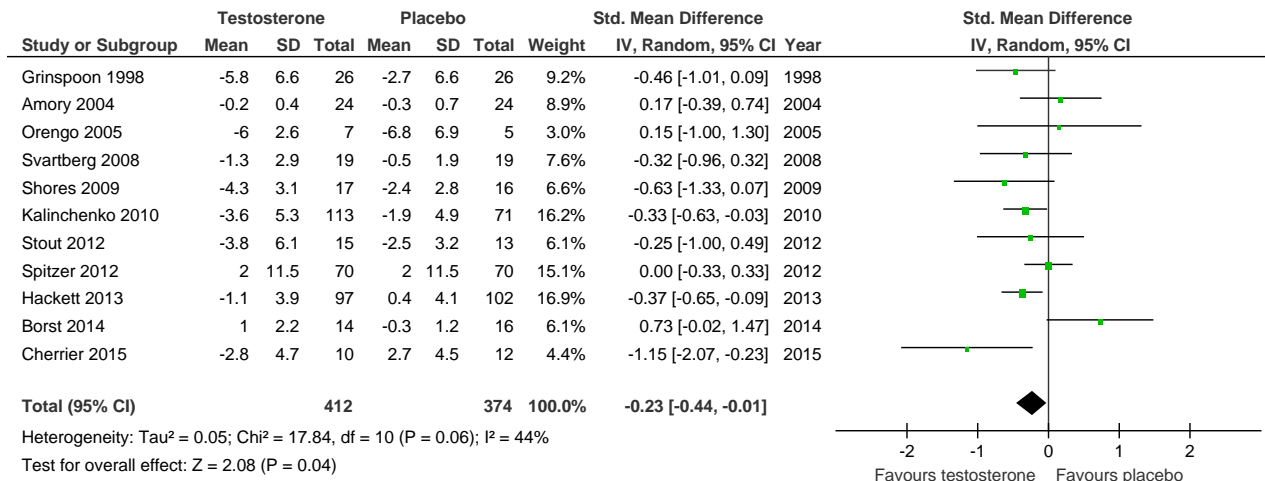

#### B) Trials involving men without major comorbidities

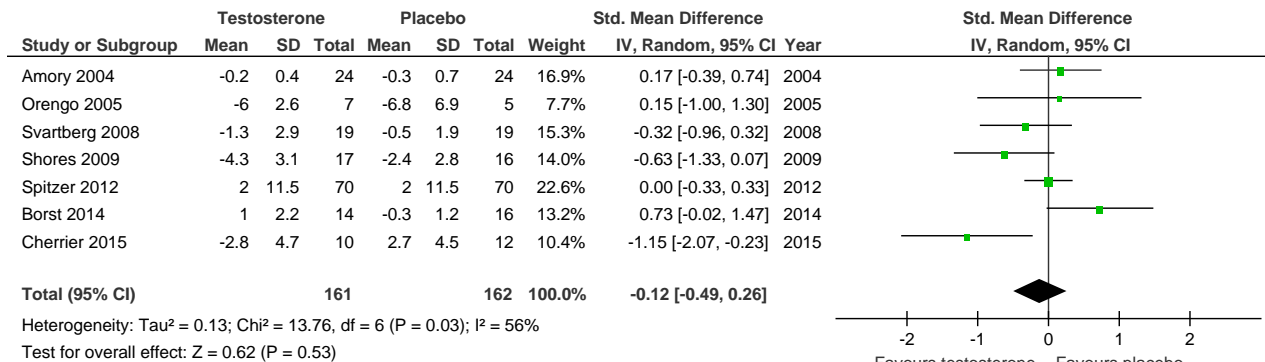

eTable 5: Depression – Bayesian network meta-analysis\*

| Treatment                    | Standardized mean difference (95% credible interval) |                       |                       |                      |                       |                            |                         |                           |                           |                                 |
|------------------------------|------------------------------------------------------|-----------------------|-----------------------|----------------------|-----------------------|----------------------------|-------------------------|---------------------------|---------------------------|---------------------------------|
|                              | Placebo                                              | Patch,<br>5 mg/d      | Gel 1%,<br>50 mg/d    | Gel 1%,<br>75 mg/d   | Gel 1%,<br>100 mg/d   | IM TU,<br>1000 mg/12<br>wk | IM TE,<br>125 mg/<br>wk | IM TE,<br>200 mg/<br>3 wk | IM TE,<br>300 mg/<br>3 wk | IM Sustanon,<br>100 mg/<br>2 wk |
| Patch,<br>5 mg/d             | -0.10<br>(-2.43,2.32)                                | —                     |                       |                      |                       |                            |                         |                           |                           |                                 |
| Gel 1%,<br>50 mg/d           | 0.17<br>(-1.72,2.00)                                 | 0.27<br>(-2.76,3.22)  | —                     |                      |                       |                            |                         |                           |                           |                                 |
| Gel 1%,<br>75 mg/d           | -0.63<br>(-2.35,1.10)                                | -0.54<br>(-3.46,2.37) | -0.80<br>(-3.33,1.74) | —                    |                       |                            |                         |                           |                           |                                 |
| Gel 1%,<br>100 mg/d          | -0.38<br>(-1.71,0.65)                                | -0.28<br>(-3.12,2.20) | -0.55<br>(-2.87,1.55) | 0.25<br>(-2.00,2.18) | —                     |                            |                         |                           |                           |                                 |
| IM TU, 1000<br>mg/12 wk      | -0.34<br>(-1.29,0.61)                                | -0.24<br>(-2.82,2.31) | -0.51<br>(-2.55,1.59) | 0.29<br>(-1.67,2.22) | 0.04<br>(-1.32,1.72)  | —                          |                         |                           |                           |                                 |
| IM TE 125<br>mg/wk           | 0.69<br>(-1.02,2.42)                                 | 0.79<br>(-2.12,3.67)  | 0.52<br>(-1.97,3.10)  | 1.32<br>(-1.12,3.76) | 1.07<br>(-0.87,3.31)  | 1.03<br>(-0.94,3.00)       | —                       |                           |                           |                                 |
| IM TE,<br>200 mg/2 wk        | 0.18<br>(-1.47,1.91)                                 | 0.28<br>(-1.38,1.92)  | 0.01<br>(-2.42,2.56)  | 0.82<br>(-1.58,3.20) | 0.56<br>(-1.32,2.81)  | 0.53<br>(-1.38,2.51)       | -0.51<br>(-2.88,1.91)   | —                         |                           |                                 |
| IM TE,<br>300 mg/3 wk        | -0.46<br>(-2.13,1.22)                                | -0.36<br>(-3.26,2.50) | -0.63<br>(-3.10,1.89) | 0.17<br>(-2.22,2.53) | -0.08<br>(-1.95,2.12) | -0.12<br>(-2.05,1.81)      | -1.15<br>(-3.54,1.29)   | -0.64<br>(-3.02,1.67)     | —                         |                                 |
| IM Sustanon,<br>100 mg/2 wk† | -0.25<br>(-1.98,1.43)                                | -0.15<br>(-3.09,2.72) | -0.42<br>(-2.93,2.11) | 0.38<br>(-2.11,2.79) | 0.13<br>(-1.84,2.33)  | 0.09<br>(-1.92,2.06)       | -0.94<br>(-3.39,1.45)   | -0.44<br>(-2.87,1.92)     | 0.21<br>(-2.23,2.58)      | —                               |

Note: IM = intramuscular, TE = testosterone enanthate, TU = testosterone undecanoate.  
 \*Random effects model. Analysis based on change from baseline. A negative SMD indicates improvement in depression. Significant changes are indicated by use of bold and colour (green indicates that the row treatment is significantly better than the column treatment, while red indicates that the row treatment is significantly worse than the column treatment). White indicates no significant difference between treatments.  
 †Blend of testosterone propionate, testosterone phenylpropionate, testosterone isocaproate, and testosterone decanoate.

## eFigure 4: Individual trial results, libido

### A) All trials

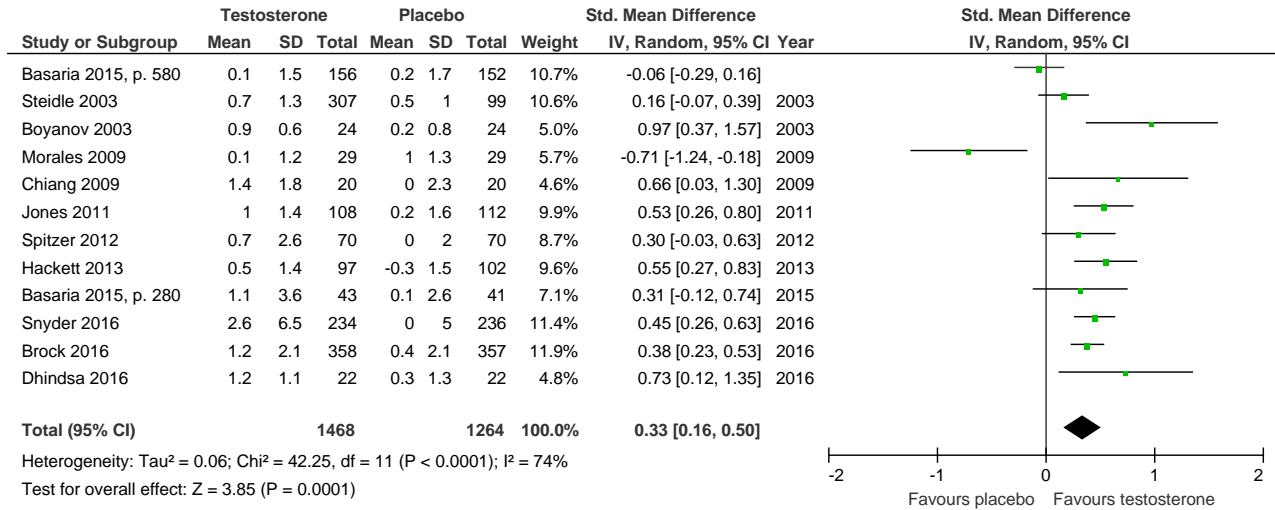

### B) Trials involving men with no major comorbidities

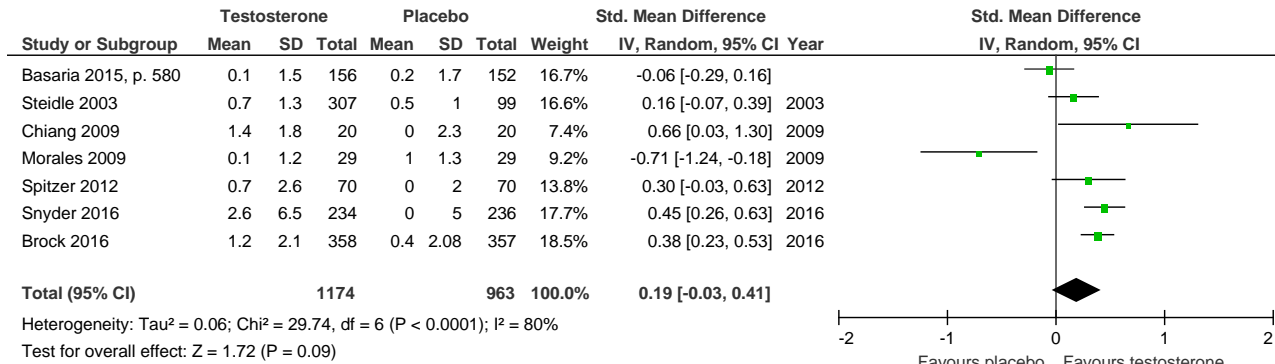

eTable6: Libido – Bayesian network meta-analysis\*

|                         | Standardized mean difference (95% credible interval) |                                      |                                      |                                   |                                     |                                      |                                      |                                      |                                   |                             |                      |
|-------------------------|------------------------------------------------------|--------------------------------------|--------------------------------------|-----------------------------------|-------------------------------------|--------------------------------------|--------------------------------------|--------------------------------------|-----------------------------------|-----------------------------|----------------------|
|                         | Placebo                                              | Patch,<br>5 mg/d                     | Gel 1%,<br>50 mg/d                   | Gel 1%,<br>75 mg/d                | Gel 1%,<br>100 mg/d                 | Gel 2%,<br>60 mg/d                   | Solution<br>2%,<br>60 mg/d           | Oral TU,<br>120 mg/d                 | Oral, TU<br>160 mg/d              | IM TU,<br>1000 mg/<br>12 wk | IM TC, 250<br>mg/2wk |
| Patch,<br>5 mg/d        | 0.17<br>(-0.13,0.46)                                 | —                                    |                                      |                                   |                                     |                                      |                                      |                                      |                                   |                             |                      |
| Gel 1%,<br>50 mg/d      | <b>0.32</b><br><b>(0.10,0.55)</b>                    | 0.15<br>(-0.10,0.42)                 | —                                    |                                   |                                     |                                      |                                      |                                      |                                   |                             |                      |
| Gel 1%,<br>75 mg/d      | -0.06<br>(-0.49,0.36)                                | -0.23<br>(-0.75,0.29)                | -0.38<br>(-0.87,0.10)                | —                                 |                                     |                                      |                                      |                                      |                                   |                             |                      |
| Gel 1%,<br>100 mg/d     | <b>0.43</b><br><b>(0.16,0.69)</b>                    | <b>0.26</b><br><b>(0.00,0.52)</b>    | 0.11<br>(-0.14,0.35)                 | 0.49<br>(-0.01,0.99)              | —                                   |                                      |                                      |                                      |                                   |                             |                      |
| Gel 2%,<br>60 mg/d      | <b>0.54</b><br><b>(0.09,0.99)</b>                    | 0.37<br>(-0.17,0.91)                 | 0.21<br>(-0.29,0.72)                 | 0.60<br>(-0.01,1.22)              | 0.11<br>(-0.41,0.63)                | —                                    |                                      |                                      |                                   |                             |                      |
| Solution 2%,<br>60 mg/d | 0.39<br>(-0.01,0.79)                                 | 0.22<br>(-0.28,0.72)                 | 0.07<br>(-0.39,0.53)                 | 0.45<br>(-0.12,1.04)              | -0.04<br>(-0.52,0.44)               | -0.15<br>(-0.75,0.46)                | —                                    |                                      |                                   |                             |                      |
| Oral TU,<br>120 mg/d    | <b>1.00</b><br><b>(0.31,1.68)</b>                    | <b>0.83</b><br><b>(0.08,1.58)</b>    | 0.68<br>(-0.05,1.39)                 | <b>1.06</b><br><b>(0.25,1.87)</b> | 0.57<br>(-0.17,1.30)                | 0.46<br>(-0.36,1.28)                 | 0.61<br>(-0.18,1.39)                 | —                                    |                                   |                             |                      |
| Oral TU,<br>160 mg/d    | <b>-0.72</b><br><b>(-1.35,-0.10)</b>                 | <b>-0.89</b><br><b>(-1.58,-0.19)</b> | <b>-1.04</b><br><b>(-1.70,-0.38)</b> | -0.66<br>(-1.41,0.10)             | <b>-1.15</b><br><b>(-1.83,0.47)</b> | <b>-1.26</b><br><b>(-2.01,-0.49)</b> | <b>-1.11</b><br><b>(-1.84,-0.37)</b> | <b>-1.72</b><br><b>(-2.66,-0.78)</b> | —                                 |                             |                      |
| IM TU, 1000<br>mg/12 wk | <b>0.57</b><br><b>(0.11,1.03)</b>                    | 0.40<br>(-0.14,0.95)                 | 0.25<br>(-0.26,0.76)                 | <b>0.63</b><br><b>(0.00,1.26)</b> | 0.14<br>(-0.38,0.67)                | 0.03<br>(-0.61,0.68)                 | 0.18<br>(-0.42,0.79)                 | -0.43<br>(-1.25,0.41)                | <b>1.29</b><br><b>(0.52,2.07)</b> | —                           |                      |
| IM TC, 250<br>mg/2wk    | <b>0.71</b><br><b>(0.01,1.41)</b>                    | 0.55<br>(-0.21,1.30)                 | 0.39<br>(-0.34,1.12)                 | 0.78<br>(-0.05,1.59)              | 0.29<br>(-0.46,1.04)                | 0.18<br>(-0.65,0.99)                 | 0.33<br>(-0.47,1.13)                 | -0.28<br>(-1.25,0.72)                | <b>1.44</b><br><b>(0.49,2.37)</b> | 0.14<br>(-0.70,0.97)        | —                    |

Note: IM = intramuscular injection, TC = testosterone cypionate, TU = testosterone undecanoate.  
 \*Random effects model. Analysis based on change from baseline. A positive SMD indicates improvement in libido. Significant changes are indicated by use of bold and colour (green indicates that the row treatment is significantly better than the column treatment, while red indicates that the row treatment is significantly worse than the column treatment). White indicates no significant difference between treatments.

**eFigure 5: Individual trial results, erectile function**

**A) All trials**

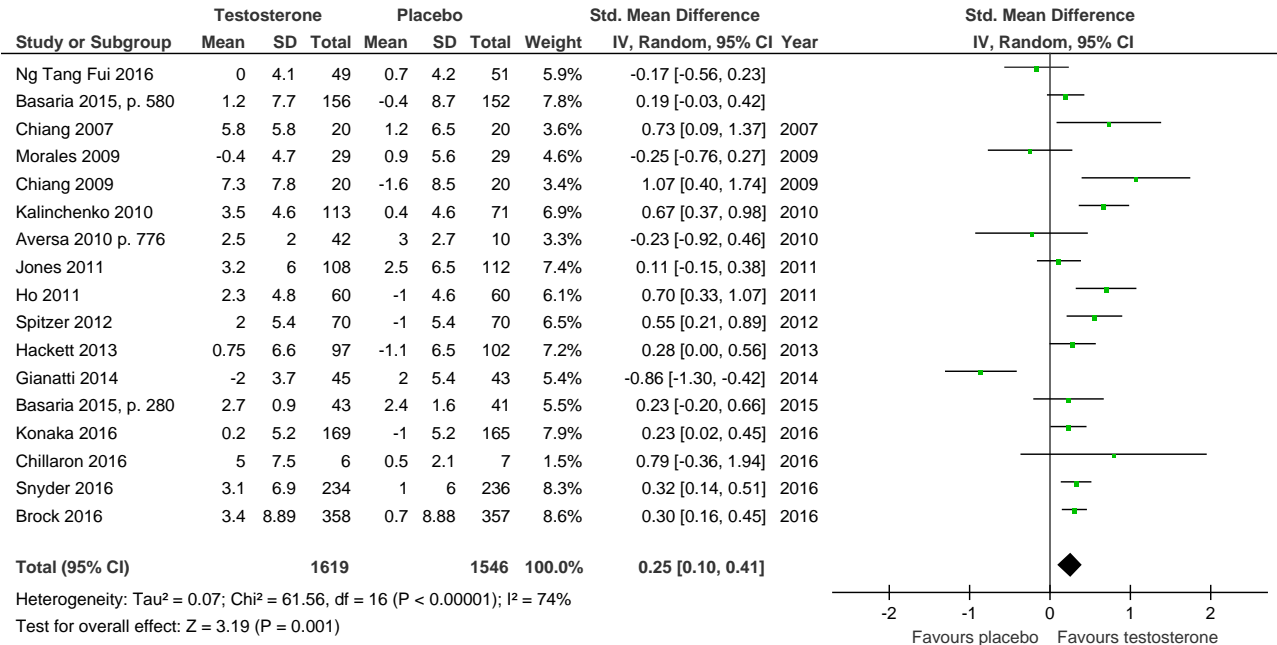

**B) Trials involving men without major comorbidities**

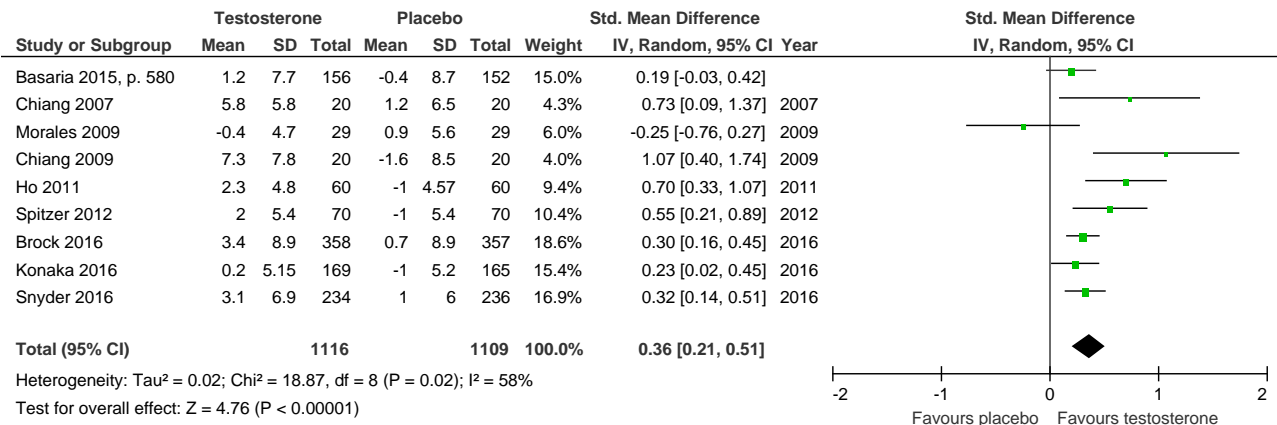



eTable7: Erectile function at end of treatment – Bayesian network meta-analysis\*

|                                  | Standardized mean difference (95% credible interval) |                       |                       |                       |                       |                         |                      |                            |                            |                     |
|----------------------------------|------------------------------------------------------|-----------------------|-----------------------|-----------------------|-----------------------|-------------------------|----------------------|----------------------------|----------------------------|---------------------|
|                                  | Placebo                                              | Gel 1%,<br>50 mg/d    | Gel 1%,<br>75 mg/d    | Gel 1%,<br>100 mg/d   | Gel 2%,<br>60 mg/d    | Solution 2%,<br>60 mg/d | Oral, TU<br>160 mg/d | IM TU,<br>1000 mg/10<br>wk | IM TU,<br>1000 mg/12<br>wk | IM TE 250<br>mg/4wk |
| <b>Gel 1%,<br/>50 mg/d</b>       | 0.65<br>(-0.11,1.42)                                 | —                     |                       |                       |                       |                         |                      |                            |                            |                     |
| <b>Gel 1%,<br/>75 mg/d</b>       | 0.26<br>(-0.60,1.11)                                 | -0.39<br>(-1.55,0.76) | —                     |                       |                       |                         |                      |                            |                            |                     |
| <b>Gel 1%, 100<br/>mg/d</b>      | 0.55<br>(-0.70,1.80)                                 | -0.10<br>(-1.57,1.35) | 0.29<br>(-1.23,1.82)  | —                     |                       |                         |                      |                            |                            |                     |
| <b>Gel 2%, 60<br/>mg/d</b>       | 0.11<br>(-1.11,1.33)                                 | -0.54<br>(-1.99,0.90) | -0.15<br>(-1.66,1.34) | -0.44<br>(-2.18,1.31) | —                     |                         |                      |                            |                            |                     |
| <b>Solution 2%,<br/>60 mg/d</b>  | 0.30<br>(-0.90,1.51)                                 | -0.35<br>(-1.79,1.07) | 0.04<br>(-1.43,1.53)  | -0.25<br>(-1.99,1.50) | 0.19<br>(-1.54,1.92)  | —                       |                      |                            |                            |                     |
| <b>Oral TU, 160<br/>mg/d</b>     | -0.47<br>(-1.41,0.43)                                | -1.12<br>(-2.34,0.05) | -0.73<br>(-2.02,0.51) | -1.03<br>(-2.60,0.52) | -0.59<br>(-2.14,0.95) | -0.78<br>(-2.31,0.73)   | —                    |                            |                            |                     |
| <b>IM TU, 1000<br/>mg/10 wk</b>  | 0.17<br>(-0.77,1.19)                                 | -0.48<br>(-1.69,0.78) | -0.09<br>(-1.35,1.24) | -0.38<br>(-1.92,1.25) | 0.06<br>(-1.47,1.66)  | -0.13<br>(-1.63,1.46)   | 0.65<br>(-0.65,2.04) | —                          |                            |                     |
| <b>IM TU, 1000<br/>mg/ 12 wk</b> | 0.21<br>(-0.36,0.76)                                 | -0.44<br>(-1.40,0.49) | -0.05<br>(-1.10,0.96) | -0.34<br>(-1.72,1.02) | 0.10<br>(-1.24,1.44)  | -0.09<br>(-1.44,1.23)   | 0.68<br>(-0.29,1.68) | 0.03<br>(-1.13,1.12)       | —                          |                     |
| <b>IM TE 250<br/>mg/4wk</b>      | 0.22<br>(-1.00,1.45)                                 | -0.43<br>(-1.88,1.01) | -0.04<br>(-1.54,1.46) | -0.33<br>(-2.08,1.41) | 0.11<br>(-1.63,1.84)  | -0.08<br>(-1.80,1.62)   | 0.69<br>(-0.83,2.22) | 0.04<br>(-1.57,1.57)       | 0.01<br>(-1.33,1.36)       | —                   |

Note: IM = intramuscular injection, TE = testosterone enanthate, TU = testosterone undecanoate.  
 \*Random effects model. Analysis based on change from baseline. A positive SMD indicates improvement in erectile function. Significant changes are indicated by use of bold and colour (green indicates that the row treatment is significantly better than the column treatment, while red indicates that the row treatment is significantly worse than the column treatment). White indicates no significant difference between treatments.

**eTable 8: Total testosterone level after 3 months of treatment – Bayesian network meta-analysis\***

\*Random effects model. Analysis is based on mean total testosterone level after treatment. A positive mean difference indicates a statistically significant improvement in total testosterone level. Significant changes are indicated by use of bold and colour (green indicates that the treatment is significantly better than the reference, while red indicates that the treatment is significantly worse than the reference). White indicates no significant difference between treatment and reference.

| Treatment                    | Reference      | Mean difference<br>(95% credible intervals) |
|------------------------------|----------------|---------------------------------------------|
| Patch 4.8 mg/d               | Placebo        | 12.46(-3.49,28.17)                          |
| Patch 5 mg/d                 |                | <b>5.06(0.88,9.25)</b>                      |
| Gel 1% 50 mg/d               |                | <b>6.54(3.51,9.65)</b>                      |
| Gel 1% 75 mg/d               |                | 7.48(-2.02,17.01)                           |
| Gel 1% 100 mg/d              |                | <b>9.82(6.19,13.44)</b>                     |
| Oral TU 120 mg/d             |                | 4.31(-4.08,12.69)                           |
| Oral TU 160 mg/d             |                | 3.64(-4.69,11.86)                           |
| Testosterone pellets 1200 mg |                | 6.40(-5.08,17.89)                           |
| IM TU 1000 mg/12 wk          |                | <b>8.91(2.80,15.08)</b>                     |
| IM TE 100 mg/wk              |                | <b>12.12(3.48,20.83)</b>                    |
| IM TE 200 mg/2wk             |                | 6.26(-2.80,15.34)                           |
| IM TE 250 mg/3wk             |                | <b>12.78(1.28,24.21)</b>                    |
| IM TC 200 mg/2 wk            |                | 3.25(-6.32,12.89)                           |
| IM TC 200 mg/4 wk            |                | 1.73(-8.61,12.15)                           |
| Durateston, IM, 250 mg/4wk   |                | 2.13(-8.21,12.60)                           |
| Patch 5 mg/d                 | Patch 4.8 mg/d | -7.40(-23.71,9.17)                          |
| Gel 1% 50 mg/d               |                | -5.91(-21.92,10.35)                         |
| Gel 1% 75 mg/d               |                | -4.98(-23.37,13.63)                         |
| Gel 1% 100 mg/d              |                | -2.64(-18.80,13.74)                         |
| Oral TU 120 mg/d             |                | -8.15(-26.04,9.82)                          |
| Oral TU 160 mg/d             |                | -8.82(-22.30,4.67)                          |
| Testosterone pellets 1200 mg |                | -6.06(-18.69,6.69)                          |
| IM TU 1000 mg/12 wk          |                | -3.55(-20.42,13.57)                         |
| IM TE 100 mg/wk              |                | -0.34(-18.30,17.61)                         |
| IM TE 200 mg/2wk             |                | -6.20(-24.42,12.21)                         |
| IM TE 250 mg/3wk             |                | 0.32(-10.51,11.25)                          |
| IM TC 200 mg/2 wk            |                | -9.21(-27.76,9.46)                          |
| IM TC 200 mg/4 wk            |                | -10.72(-29.59,8.36)                         |
| Durateston, IM, 250 mg/4wk   |                | -10.33(-29.25,8.69)                         |
| Gel 1% 50 mg/d               | Patch 5 mg/d   | 1.48(-2.69,5.71)                            |
| Gel 1% 75 mg/d               |                | 2.41(-7.90,12.76)                           |
| Gel 1% 100 mg/d              |                | <b>4.76(0.40,9.04)</b>                      |
| Oral TU 120 mg/d             |                | -0.75(-10.16,8.55)                          |

|                              |                 |                     |
|------------------------------|-----------------|---------------------|
| Oral TU 160 mg/d             |                 | -1.43(-10.82,7.80)  |
| Testosterone pellets 1200 mg |                 | 1.34(-10.92,13.53)  |
| IM TU 1000 mg/12 wk          |                 | 3.85(-3.58,11.27)   |
| IM TE 100 mg/wk              |                 | 7.06(-2.53,16.60)   |
| IM TE 200 mg/2wk             |                 | 1.19(-8.83,11.18)   |
| IM TE 250 mg/3wk             |                 | 7.72(-4.58,19.84)   |
| IM TC 200 mg/2 wk            |                 | -1.81(-12.35,8.73)  |
| IM TC 200 mg/4 wk            |                 | -3.33(-14.50,7.86)  |
| Durateston, IM, 250 mg/4wk   |                 | -2.94(-14.12,8.32)  |
| Gel 1% 75 mg/d               | Gel 1% 50 mg/d  | 0.93(-8.98,10.93)   |
| Gel 1% 100 mg/d              |                 | 3.27(-0.68,7.16)    |
| Oral TU 120 mg/d             |                 | -2.23(-11.30,6.62)  |
| Oral TU 160 mg/d             |                 | -2.91(-11.82,5.84)  |
| Testosterone pellets 1200 mg |                 | -0.14(-12.11,11.71) |
| IM TU 1000 mg/12 wk          |                 | 2.37(-4.49,9.22)    |
| IM TE 100 mg/wk              |                 | 5.57(-3.60,14.72)   |
| IM TE 200 mg/2wk             |                 | -0.29(-9.83,9.28)   |
| IM TE 250 mg/3wk             |                 | 6.24(-5.72,18.05)   |
| IM TC 200 mg/2 wk            |                 | -3.30(-13.42,6.78)  |
| IM TC 200 mg/4 wk            |                 | -4.81(-15.66,5.96)  |
| Durateston, IM, 250 mg/4wk   |                 | -4.42(-15.28,6.46)  |
| Gel 1% 100 mg/d              | Gel 1% 75 mg/d  | 2.34(-7.87,12.46)   |
| Oral TU 120 mg/d             |                 | -3.17(-15.86,9.38)  |
| Oral TU 160 mg/d             |                 | -3.84(-16.49,8.72)  |
| Testosterone pellets 1200 mg |                 | -1.07(-15.98,13.79) |
| IM TU 1000 mg/12 wk          |                 | 1.44(-9.92,12.73)   |
| IM TE 100 mg/wk              |                 | 4.64(-8.23,17.49)   |
| IM TE 200 mg/2wk             |                 | -1.22(-14.30,11.90) |
| IM TE 250 mg/3wk             |                 | 5.31(-9.66,20.08)   |
| IM TC 200 mg/2 wk            |                 | -4.23(-17.84,9.24)  |
| IM TC 200 mg/4 wk            |                 | -5.74(-19.84,8.38)  |
| Durateston, IM, 250 mg/4wk   |                 | -5.35(-19.41,8.93)  |
| Oral TU 120 mg/d             | Gel 1% 100 mg/d | -5.51(-14.69,3.57)  |
| Oral TU 160 mg/d             |                 | -6.18(-15.23,2.79)  |
| Testosterone pellets 1200 mg |                 | -3.41(-15.41,8.57)  |
| IM TU 1000 mg/12 wk          |                 | -0.91(-8.03,6.24)   |
| IM TE 100 mg/wk              |                 | 2.30(-7.08,11.64)   |
| IM TE 200 mg/2wk             |                 | -3.56(-13.34,6.30)  |
| IM TE 250 mg/3wk             |                 | 2.96(-9.16,14.85)   |
| IM TC 200 mg/2 wk            |                 | -6.57(-16.82,3.69)  |
| IM TC 200 mg/4 wk            |                 | -8.08(-19.02,2.89)  |
| Durateston, IM, 250 mg/4wk   |                 | -7.69(-18.61,3.38)  |

|                              |                              |                         |
|------------------------------|------------------------------|-------------------------|
| Oral TU 160 mg/d             | Oral TU 120 mg/d             | -0.67(-12.46,11.10)     |
| Testosterone pellets 1200 mg |                              | 2.09(-12.01,16.29)      |
| IM TU 1000 mg/12 wk          |                              | 4.60(-5.79,14.94)       |
| IM TE 100 mg/wk              |                              | 7.81(-4.20,19.92)       |
| IM TE 200 mg/2wk             |                              | 1.95(-10.36,14.39)      |
| IM TE 250 mg/3wk             |                              | 8.47(-5.65,22.61)       |
| IM TC 200 mg/2 wk            |                              | -1.06(-13.92,11.70)     |
| IM TC 200 mg/4 wk            |                              | -2.58(-16.00,10.91)     |
| Durateston, IM, 250 mg/4wk   |                              | -2.18(-15.61,11.22)     |
| Testosterone pellets 1200 mg | Oral TU 160 mg/d             | 2.77(-5.26,10.82)       |
| IM TU 1000 mg/12 wk          |                              | 5.28(-5.00,15.64)       |
| IM TE 100 mg/wk              |                              | 8.48(-3.53,20.45)       |
| IM TE 200 mg/2wk             |                              | 2.62(-9.56,14.98)       |
| IM TE 250 mg/3wk             |                              | <b>9.15(1.17,17.13)</b> |
| IM TC 200 mg/2 wk            |                              | -0.39(-13.19,12.34)     |
| IM TC 200 mg/4 wk            |                              | -1.90(-15.18,11.34)     |
| Durateston, IM, 250 mg/4wk   |                              | -1.51(-14.84,11.86)     |
| IM TU 1000 mg/12 wk          | Testosterone pellets 1200 mg | 2.51(-10.54,15.55)      |
| IM TE 100 mg/wk              |                              | 5.71(-8.62,19.97)       |
| IM TE 200 mg/2wk             |                              | -0.15(-14.76,14.51)     |
| IM TE 250 mg/3wk             |                              | 6.38(-0.25,13.01)       |
| IM TC 200 mg/2 wk            |                              | -3.16(-18.21,11.86)     |
| IM TC 200 mg/4 wk            |                              | -4.67(-20.16,10.75)     |
| Durateston, IM, 250 mg/4wk   |                              | -4.28(-19.96,11.21)     |
| IM TE 100 mg/wk              | IM TU 1000 mg/12 wk          | 3.21(-7.33,13.81)       |
| IM TE 200 mg/2wk             |                              | -2.66(-13.63,8.30)      |
| IM TE 250 mg/3wk             |                              | 3.87(-9.22,16.79)       |
| IM TC 200 mg/2 wk            |                              | -5.66(-17.05,5.71)      |
| IM TC 200 mg/4 wk            |                              | -7.18(-15.50,1.16)      |
| Durateston, IM, 250 mg/4wk   |                              | -6.79(-15.25,1.65)      |
| IM TE 200 mg/2wk             | IM TE 100 mg/wk              | -5.86(-18.36,6.71)      |
| IM TE 250 mg/3wk             |                              | 0.66(-13.63,15.00)      |
| IM TC 200 mg/2 wk            |                              | -8.87(-21.88,4.14)      |
| IM TC 200 mg/4 wk            |                              | -10.38(-23.84,3.13)     |
| Durateston, IM, 250 mg/4wk   |                              | -9.99(-23.47,3.48)      |
| IM TE 250 mg/3wk             | IM TE 200 mg/2wk             | 6.53(-8.23,21.04)       |
| IM TC 200 mg/2 wk            |                              | -3.01(-16.17,10.25)     |
| IM TC 200 mg/4 wk            |                              | -4.52(-18.16,9.20)      |
| Durateston, IM, 250 mg/4wk   |                              | -4.13(-17.94,9.72)      |
| IM TC 200 mg/2 wk            | IM TE 250 mg/3wk             | -9.53(-24.53,5.59)      |
| IM TC 200 mg/4 wk            |                              | -11.05(-26.44,4.43)     |
| Durateston, IM, 250 mg/4wk   |                              | -10.65(-26.22,4.95)     |

|                            |                   |                     |
|----------------------------|-------------------|---------------------|
| IM TC 200 mg/4 wk          | IM TC 200 mg/2 wk | -1.51(-15.53,12.52) |
| Durateston, IM, 250 mg/4wk |                   | -1.12(-15.17,13.08) |
| Durateston, IM, 250 mg/4wk | IM TC 200 mg/4 wk | 0.39(-8.03,8.79)    |

**eTable 9: Total testosterone level after 6 months of treatment – Bayesian network meta-analysis\***

\*Random effects model. Analysis based mean total testosterone level after treatment. A positive MD indicates a statistically significant improvement in total testosterone level. Significant changes are indicated by use of bold and colour (green indicates that the row treatment is significantly better than the column treatment, while red indicates that the row treatment is significantly worse than the column treatment). White indicates no significant difference between treatments.

| Treatment                    | Reference      | Mean difference<br>(95% credible interval) |
|------------------------------|----------------|--------------------------------------------|
| Patch 4.8 mg/d               | Placebo        | 10.69(-1.17,22.73)                         |
| Patch 5 mg/d                 |                | <b>8.45(0.51,16.35)</b>                    |
| Gel 1% 50 mg/d               |                | <b>7.94(4.36,11.49)</b>                    |
| Gel 1% 75 mg/d               |                | 5.76(-0.75,12.29)                          |
| Gel 1% 100 mg/d              |                | <b>7.47(3.50,11.40)</b>                    |
| Gel 2% 60 mg/d               |                | <b>19.80(13.59,26.00)</b>                  |
| Gel 2.5%, 125 mg/d           |                | <b>12.13(2.00,22.09)</b>                   |
| Gel (scrotal) 2.5%, 25 mg/d  |                | 7.89(-2.18,17.86)                          |
| Oral TU 120-160 mg/d         |                | 5.68(-0.52,11.88)                          |
| Oral TU 160 mg/d             |                | 1.84(-2.44,6.10)                           |
| Testosterone pellets 1200 mg |                | 4.69(-2.86,12.17)                          |
| IM TU 1000 mg/12 wk          |                | <b>8.07(3.71,12.46)</b>                    |
| IM TE 150 mg/2wk             |                | <b>12.72(5.10,20.29)</b>                   |
| IM TE 200 mg/2wk             |                | <b>10.10(2.68,17.61)</b>                   |
| IM TE 250 mg/3wk             |                | <b>11.02(3.59,18.55)</b>                   |
| IM TE 300 mg/3wk             |                | <b>18.25(10.92,25.60)</b>                  |
| IM TE 50-400 mg/1-2 wk       |                | <b>14.74(4.55,25.01)</b>                   |
| IM TC 200 mg/2 wk            |                | 3.21(-4.73,11.12)                          |
| Patch 5 mg/d                 | Patch 4.8 mg/d | -2.24(-16.71,11.98)                        |
| Gel 1% 50 mg/d               |                | -2.75(-15.42,9.56)                         |
| Gel 1% 75 mg/d               |                | -4.94(-18.49,8.60)                         |
| Gel 1% 100 mg/d              |                | -3.22(-15.94,9.31)                         |
| Gel 2% 60 mg/d               |                | 9.11(-4.41,22.45)                          |
| Gel 2.5%, 125 mg/d           |                | 1.44(-14.32,16.85)                         |
| Gel (scrotal) 2.5%, 25 mg/d  |                | -2.80(-18.53,12.61)                        |
| Oral TU 120-160 mg/d         |                | -5.01(-18.65,8.35)                         |
| Oral TU 160 mg/d             |                | -8.85(-20.06,2.21)                         |
| Testosterone pellets 1200 mg |                | -6.01(-16.78,4.72)                         |

|                              |                |                            |
|------------------------------|----------------|----------------------------|
| IM TU 1000 mg/12 wk          |                | -2.62(-14.99,9.53)         |
| IM TE 150 mg/2wk             |                | 2.03(-12.24,16.16)         |
| IM TE 200 mg/2wk             |                | -0.59(-14.66,13.38)        |
| IM TE 250 mg/3wk             |                | 0.33(-9.00,9.68)           |
| IM TE 300 mg/3wk             |                | 7.56(-6.50,21.52)          |
| IM TE 50-400 mg/1-2 wk       |                | 4.05(-11.55,19.64)         |
| IM TC 200 mg/2 wk            |                | -7.49(-21.86,6.80)         |
| Gel 1% 50 mg/d               | Patch 5 mg/d   | -0.51(-9.17,8.26)          |
| Gel 1% 75 mg/d               |                | -2.70(-12.88,7.57)         |
| Gel 1% 100 mg/d              |                | -0.98(-9.71,7.83)          |
| Gel 2% 60 mg/d               |                | <b>11.35(1.38,21.45)</b>   |
| Gel 2.5%, 125 mg/d           |                | 3.68(-2.57,9.89)           |
| Gel (scrotal) 2.5%, 25 mg/d  |                | -0.56(-6.82,5.64)          |
| Oral TU 120-160 mg/d         |                | -2.77(-12.83,7.29)         |
| Oral TU 160 mg/d             |                | -6.61(-15.60,2.37)         |
| Testosterone pellets 1200 mg |                | -3.76(-14.64,7.17)         |
| IM TU 1000 mg/12 wk          |                | -0.38(-9.40,8.59)          |
| IM TE 150 mg/2wk             |                | 4.27(-6.77,15.19)          |
| IM TE 200 mg/2wk             |                | 1.65(-9.12,12.46)          |
| IM TE 250 mg/3wk             |                | 2.57(-8.35,13.50)          |
| IM TE 300 mg/3wk             |                | 9.80(-1.00,20.57)          |
| IM TE 50-400 mg/1-2 wk       |                | 6.29(-6.46,19.33)          |
| IM TC 200 mg/2 wk            |                | -5.25(-16.35,5.95)         |
| Gel 1% 75 mg/d               | Gel 1% 50 mg/d | -2.19(-9.54,5.26)          |
| Gel 1% 100 mg/d              |                | -0.47(-5.79,4.89)          |
| Gel 2% 60 mg/d               |                | <b>11.86(4.68,19.05)</b>   |
| Gel 2.5%, 125 mg/d           |                | 4.19(-6.52,14.80)          |
| Gel (scrotal) 2.5%, 25 mg/d  |                | -0.05(-10.72,10.61)        |
| Oral TU 120-160 mg/d         |                | -2.26(-9.34,4.96)          |
| Oral TU 160 mg/d             |                | <b>-6.10(-11.64,-0.46)</b> |
| Testosterone pellets 1200 mg |                | -3.25(-11.55,5.08)         |
| IM TU 1000 mg/12 wk          |                | 0.13(-5.49,5.79)           |
| IM TE 150 mg/2wk             |                | 4.78(-3.58,13.19)          |
| IM TE 200 mg/2wk             |                | 2.16(-5.97,10.48)          |
| IM TE 250 mg/3wk             |                | 3.08(-5.14,11.45)          |
| IM TE 300 mg/3wk             |                | <b>10.31(2.17,18.53)</b>   |
| IM TE 50-400 mg/1-2 wk       |                | 6.80(-4.00,17.62)          |
| IM TC 200 mg/2 wk            |                | -4.74(-13.42,3.94)         |
| Gel 1% 100 mg/d              | Gel 1% 75 mg/d | 1.71(-5.94,9.34)           |
| Gel 2% 60 mg/d               |                | <b>14.04(5.05,22.97)</b>   |
| Gel 2.5%, 125 mg/d           |                | 6.37(-5.71,18.31)          |
| Gel (scrotal) 2.5%, 25 mg/d  |                | 2.14(-9.89,14.03)          |

|                              |                    |                              |
|------------------------------|--------------------|------------------------------|
| Oral TU 120-160 mg/d         |                    | -0.07(-9.16,8.90)            |
| Oral TU 160 mg/d             |                    | -3.91(-11.78,3.88)           |
| Testosterone pellets 1200 mg |                    | -1.07(-10.98,8.82)           |
| IM TU 1000 mg/12 wk          |                    | 2.31(-5.63,10.19)            |
| IM TE 150 mg/2wk             |                    | 6.96(-3.13,17.01)            |
| IM TE 200 mg/2wk             |                    | 4.35(-5.60,14.23)            |
| IM TE 250 mg/3wk             |                    | 5.26(-4.59,15.19)            |
| IM TE 300 mg/3wk             |                    | <b>12.50(2.64,22.31)</b>     |
| IM TE 50-400 mg/1-2 wk       |                    | 8.99(-3.00,21.03)            |
| IM TC 200 mg/2 wk            |                    | -2.55(-12.74,7.68)           |
| Gel 2% 60 mg/d               | Gel 1% 100 mg/d    | <b>12.33(5.03,19.71)</b>     |
| Gel 2.5%, 125 mg/d           |                    | 4.66(-6.17,15.34)            |
| Gel (scrotal) 2.5%, 25 mg/d  |                    | 0.42(-10.35,11.17)           |
| Oral TU 120-160 mg/d         |                    | -1.79(-9.10,5.58)            |
| Oral TU 160 mg/d             |                    | -5.63(-11.50,0.28)           |
| Testosterone pellets 1200 mg |                    | -2.78(-11.34,5.78)           |
| IM TU 1000 mg/12 wk          |                    | 0.60(-5.31,6.53)             |
| IM TE 150 mg/2wk             |                    | 5.25(-3.38,13.81)            |
| IM TE 200 mg/2wk             |                    | 2.63(-5.77,11.14)            |
| IM TE 250 mg/3wk             |                    | 3.55(-4.93,12.14)            |
| IM TE 300 mg/3wk             |                    | <b>10.78(2.42,19.14)</b>     |
| IM TE 50-400 mg/1-2 wk       |                    | 7.28(-3.63,18.18)            |
| IM TC 200 mg/2 wk            |                    | -4.27(-13.06,4.61)           |
| Gel 2.5%, 125 mg/d           | Gel 2% 60 mg/d     | -7.67(-19.47,3.96)           |
| Gel (scrotal) 2.5%, 25 mg/d  |                    | <b>-11.91(-23.69,-0.16)</b>  |
| Oral TU 120-160 mg/d         |                    | <b>-14.11(-22.91,-5.33)</b>  |
| Oral TU 160 mg/d             |                    | <b>-17.96(-25.47,-10.36)</b> |
| Testosterone pellets 1200 mg |                    | <b>-15.11(-24.85,-5.36)</b>  |
| IM TU 1000 mg/12 wk          |                    | <b>-11.73(-19.31,-4.11)</b>  |
| IM TE 150 mg/2wk             |                    | -7.08(-16.88,2.74)           |
| IM TE 200 mg/2wk             |                    | <b>-9.70(-19.39,-0.03)</b>   |
| IM TE 250 mg/3wk             |                    | -8.78(-18.41,1.02)           |
| IM TE 300 mg/3wk             |                    | -1.55(-11.11,8.12)           |
| IM TE 50-400 mg/1-2 wk       |                    | -5.05(-16.93,6.87)           |
| IM TC 200 mg/2 wk            |                    | <b>-16.59(-26.63,-6.52)</b>  |
| Gel (scrotal) 2.5%, 25 mg/d  | Gel 2.5%, 125 mg/d | -4.24(-10.53,1.98)           |
| Oral TU 120-160 mg/d         |                    | -6.45(-18.26,5.33)           |
| Oral TU 160 mg/d             |                    | -10.29(-21.22,0.66)          |
| Testosterone pellets 1200 mg |                    | -7.44(-19.87,5.14)           |
| IM TU 1000 mg/12 wk          |                    | -4.06(-14.99,6.89)           |
| IM TE 150 mg/2wk             |                    | 0.59(-12.00,13.23)           |
| IM TE 200 mg/2wk             |                    | -2.03(-14.56,10.54)          |

|                              |                              |                          |
|------------------------------|------------------------------|--------------------------|
| IM TE 250 mg/3wk             |                              | -1.11(-13.58,11.45)      |
| IM TE 300 mg/3wk             |                              | 6.12(-6.29,18.59)        |
| IM TE 50-400 mg/1-2 wk       |                              | 2.62(-11.57,17.04)       |
| IM TC 200 mg/2 wk            |                              | -8.92(-21.55,3.89)       |
| Oral TU 120-160 mg/d         | Gel (scrotal) 2.5%, 25 mg/d  | -2.21(-14.01,9.62)       |
| Oral TU 160 mg/d             |                              | -6.05(-16.91,4.92)       |
| Testosterone pellets 1200 mg |                              | -3.21(-15.72,9.40)       |
| IM TU 1000 mg/12 wk          |                              | 0.18(-10.74,11.14)       |
| IM TE 150 mg/2wk             |                              | 4.82(-7.68,17.43)        |
| IM TE 200 mg/2wk             |                              | 2.21(-10.23,14.82)       |
| IM TE 250 mg/3wk             |                              | 3.13(-9.48,15.73)        |
| IM TE 300 mg/3wk             |                              | 10.36(-2.02,22.83)       |
| IM TE 50-400 mg/1-2 wk       |                              | 6.85(-7.36,21.24)        |
| IM TC 200 mg/2 wk            |                              | -4.69(-17.36,8.11)       |
| Oral TU 160 mg/d             | Oral TU 120-160 mg/d         | -3.84(-11.38,3.69)       |
| Testosterone pellets 1200 mg |                              | -1.00(-10.73,8.75)       |
| IM TU 1000 mg/12 wk          |                              | 2.39(-5.28,10.08)        |
| IM TE 150 mg/2wk             |                              | 7.03(-2.78,16.80)        |
| IM TE 200 mg/2wk             |                              | 4.42(-5.26,14.13)        |
| IM TE 250 mg/3wk             |                              | 5.33(-4.33,15.11)        |
| IM TE 300 mg/3wk             |                              | <b>12.57(2.91,22.18)</b> |
| IM TE 50-400 mg/1-2 wk       |                              | 9.06(-2.84,21.05)        |
| IM TC 200 mg/2 wk            |                              | -2.48(-12.54,7.57)       |
| Testosterone pellets 1200 mg | Oral TU 160 mg/d             | 2.84(-3.35,9.02)         |
| IM TU 1000 mg/12 wk          |                              | <b>6.23(1.04,11.41)</b>  |
| IM TE 150 mg/2wk             |                              | <b>10.87(2.16,19.57)</b> |
| IM TE 200 mg/2wk             |                              | 8.26(-0.33,16.82)        |
| IM TE 250 mg/3wk             |                              | <b>9.18(3.03,15.42)</b>  |
| IM TE 300 mg/3wk             |                              | <b>16.41(7.93,25.00)</b> |
| IM TE 50-400 mg/1-2 wk       |                              | <b>12.90(1.81,23.95)</b> |
| IM TC 200 mg/2 wk            |                              | 1.36(-7.75,10.40)        |
| IM TU 1000 mg/12 wk          | Testosterone pellets 1200 mg | 3.38(-4.67,11.50)        |
| IM TE 150 mg/2wk             |                              | 8.03(-2.77,18.77)        |
| IM TE 200 mg/2wk             |                              | 5.42(-5.01,16.06)        |
| IM TE 250 mg/3wk             |                              | <b>6.33(0.97,11.73)</b>  |
| IM TE 300 mg/3wk             |                              | <b>13.57(3.19,24.08)</b> |
| IM TE 50-400 mg/1-2 wk       |                              | 10.06(-2.53,22.73)       |
| IM TC 200 mg/2 wk            |                              | -1.48(-12.38,9.46)       |
| IM TE 150 mg/2wk             | IM TU 1000 mg/12 wk          | 4.65(-4.13,13.37)        |
| IM TE 200 mg/2wk             |                              | 2.03(-6.70,10.69)        |
| IM TE 250 mg/3wk             |                              | 2.95(-5.08,11.11)        |
| IM TE 300 mg/3wk             |                              | <b>10.18(1.58,18.75)</b> |



|                        |                        |                             |
|------------------------|------------------------|-----------------------------|
| IM TE 50-400 mg/1-2 wk |                        | 6.68(-4.45,17.75)           |
| IM TC 200 mg/2 wk      |                        | -4.86(-13.89,4.19)          |
| IM TE 200 mg/2wk       | IM TE 150 mg/2wk       | -2.61(-13.28,8.17)          |
| IM TE 250 mg/3wk       |                        | -1.70(-12.39,9.20)          |
| IM TE 300 mg/3wk       |                        | 5.54(-5.10,16.15)           |
| IM TE 50-400 mg/1-2 wk |                        | 2.03(-10.78,14.82)          |
| IM TC 200 mg/2 wk      |                        | -9.51(-20.53,1.51)          |
| IM TE 250 mg/3wk       | IM TE 200 mg/2wk       | 0.92(-9.64,11.36)           |
| IM TE 300 mg/3wk       |                        | 8.15(-2.38,18.61)           |
| IM TE 50-400 mg/1-2 wk |                        | 4.64(-7.93,17.27)           |
| IM TC 200 mg/2 wk      |                        | -6.90(-17.80,4.00)          |
| IM TE 300 mg/3wk       | IM TE 250 mg/3wk       | 7.23(-3.23,17.75)           |
| IM TE 50-400 mg/1-2 wk |                        | 3.73(-8.88,16.28)           |
| IM TC 200 mg/2 wk      | IM TE 300 mg/3wk       | -7.81(-18.75,3.15)          |
| IM TE 50-400 mg/1-2 wk |                        | -3.51(-16.11,8.94)          |
| IM TC 200 mg/2 wk      |                        | <b>-15.05(-25.92,-4.21)</b> |
| IM TC 200 mg/2 wk      | IM TE 50-400 mg/1-2 wk | -11.54(-24.57,1.32)         |

**eTable 10: Total testosterone levels at the end of treatment – Bayesian network meta-analysis\***

\*Random effects model. Analysis is based on mean total testosterone level after treatment. A positive mean difference indicates a statistically significant improvement in total testosterone level. Significant changes are indicated by use of bold and colour (green indicates that the treatment is significantly better than the reference, while red indicates that the treatment is significantly worse than the reference). White indicates no significant difference between treatment and reference.

| Treatment                    | Reference | Mean difference<br>(95% credible interval) |
|------------------------------|-----------|--------------------------------------------|
| Patch 4.8 mg/d               | Placebo   | 8.00(-3.40,19.24)                          |
| Patch 5 mg/d                 |           | 4.74(1.65,7.84)                            |
| Gel 1% 5 mg/d                |           | 3.66(-4.21,11.57)                          |
| Gel 1% 50 mg/d               |           | 6.54(4.27,8.85)                            |
| Gel 1% 75 mg/d               |           | 6.49(0.92,12.04)                           |
| Gel 1% 100 mg/d              |           | 9.76(6.92,12.61)                           |
| Gel 2% 60 mg/d               |           | 19.76(12.66,26.85)                         |
| Gel 2.5%, 125 mg/d           |           | 8.44(0.75,16.16)                           |
| Gel (scrotal) 2.5%, 25 mg/d  |           | 4.19(-3.53,11.91)                          |
| Solution 2%, 60 mg/d         |           | 8.47(0.47,16.40)                           |
| Oral TU 120 mg/d             |           | 4.32(-2.98,11.63)                          |
| Oral TU 160 mg/d             |           | 1.40(-2.28,5.08)                           |
| Oral TU 120-160 mg/d         |           | 5.69(-1.33,12.73)                          |
| Testosterone pellets 1200 mg |           | 2.77(-3.99,9.50)                           |
| IM TU 1000 mg/9 wk           |           | 16.32(6.99,25.58)                          |
| IM TU 1000 mg/10 wk          |           | 5.70(0.07,11.29)                           |

|                              |                |                     |
|------------------------------|----------------|---------------------|
| IM TU 1000 mg/12 wk          |                | 8.45(5.99,10.90)    |
| IM TE 100 mg/wk              |                | 9.52(4.08,14.91)    |
| IM TE 125 mg/wk              |                | 6.76(-3.38,16.87)   |
| IM TE 150 mg/2wk             |                | 12.71(4.36,21.09)   |
| IM TE 200 mg/2wk             |                | 10.67(5.96,15.35)   |
| IM TE 250 mg/3wk             |                | 8.33(2.98,13.71)    |
| IM TE 300 mg/3wk             |                | 18.26(9.96,26.49)   |
| IM TE 50-400 mg/1-2 wk       |                | 14.74(3.91,25.46)   |
| IM TC 200 mg/2 wk            |                | 3.20(-5.49,11.85)   |
| IM TC 200 mg/4 wk            |                | 1.30(-6.39,8.98)    |
| IM TC 250 mg/2wk             |                | 9.73(1.91,17.51)    |
| Durateston, IM, 250 mg/4wk   |                | 1.67(-6.17,9.42)    |
| Patch 5 mg/d                 | Patch 4.8 mg/d | -3.26(-14.89,8.56)  |
| Gel 1% 5 mg/d                |                | -4.34(-18.04,9.54)  |
| Gel 1% 50 mg/d               |                | -1.46(-12.93,10.15) |
| Gel 1% 75 mg/d               |                | -1.51(-14.10,11.24) |
| Gel 1% 100 mg/d              |                | 1.76(-9.83,13.46)   |
| Gel 2% 60 mg/d               |                | 11.76(-1.57,25.26)  |
| Gel 2.5%, 125 mg/d           |                | 0.44(-13.20,14.18)  |
| Gel (scrotal) 2.5%, 25 mg/d  |                | -3.81(-17.47,9.95)  |
| Solution 2%, 60 mg/d         |                | 0.47(-13.38,14.35)  |
| Oral TU 120 mg/d             |                | -3.68(-17.02,9.84)  |
| Oral TU 160 mg/d             |                | -6.60(-17.82,4.81)  |
| Oral TU 120-160 mg/d         |                | -2.31(-15.69,11.06) |
| Testosterone pellets 1200 mg |                | -5.23(-16.69,6.32)  |
| IM TU 1000 mg/9 wk           |                | 8.32(-4.22,20.91)   |
| IM TU 1000 mg/10 wk          |                | -2.30(-14.89,10.43) |
| IM TU 1000 mg/12 wk          |                | 0.45(-11.02,12.05)  |
| IM TE 100 mg/wk              |                | 1.52(-10.96,14.13)  |
| IM TE 125 mg/wk              |                | -1.24(-16.45,13.89) |
| IM TE 150 mg/2wk             |                | 4.71(-9.35,18.84)   |
| IM TE 200 mg/2wk             |                | 2.67(-9.60,14.94)   |
| IM TE 250 mg/3wk             |                | 0.33(-9.63,10.45)   |
| IM TE 300 mg/3wk             |                | 10.26(-3.79,24.37)  |
| IM TE 50-400 mg/1-2 wk       |                | 6.75(-8.90,22.49)   |
| IM TC 200 mg/2 wk            |                | -4.80(-19.10,9.52)  |
| IM TC 200 mg/4 wk            |                | -6.70(-20.28,7.08)  |
| IM TC 250 mg/2wk             |                | 1.73(-11.91,15.43)  |
| Durateston, IM, 250 mg/4wk   |                | -6.33(-20.01,7.57)  |
| Gel 1% 5 mg/d                | Patch 5 mg/d   | -1.08(-9.49,7.42)   |
| Gel 1% 50 mg/d               |                | 1.80(-1.49,5.16)    |
| Gel 1% 75 mg/d               |                | 1.76(-4.64,8.14)    |

|                              |               |                    |
|------------------------------|---------------|--------------------|
| Gel 1% 100 mg/d              |               | 5.02(1.52,8.49)    |
| Gel 2% 60 mg/d               |               | 15.02(7.19,22.80)  |
| Gel 2.5%, 125 mg/d           |               | 3.70(-3.39,10.73)  |
| Gel (scrotal) 2.5%, 25 mg/d  |               | -0.55(-7.68,6.53)  |
| Solution 2%, 60 mg/d         |               | 3.73(-4.85,12.32)  |
| Oral TU 120 mg/d             |               | -0.41(-8.32,7.44)  |
| Oral TU 160 mg/d             |               | -3.33(-8.17,1.43)  |
| Oral TU 120-160 mg/d         |               | 0.95(-6.78,8.61)   |
| Testosterone pellets 1200 mg |               | -1.97(-9.42,5.39)  |
| IM TU 1000 mg/9 wk           |               | 11.58(1.73,21.42)  |
| IM TU 1000 mg/10 wk          |               | 0.96(-5.42,7.38)   |
| IM TU 1000 mg/12 wk          |               | 3.72(-0.31,7.66)   |
| IM TE 100 mg/wk              |               | 4.78(-1.44,10.97)  |
| IM TE 125 mg/wk              |               | 2.02(-8.51,12.56)  |
| IM TE 150 mg/2wk             |               | 7.97(-0.95,16.86)  |
| IM TE 200 mg/2wk             |               | 5.93(0.94,10.87)   |
| IM TE 250 mg/3wk             |               | 3.59(-2.64,9.81)   |
| IM TE 300 mg/3wk             |               | 13.52(4.66,22.31)  |
| IM TE 50-400 mg/1-2 wk       |               | 10.01(-1.36,21.18) |
| IM TC 200 mg/2 wk            |               | -1.54(-10.74,7.65) |
| IM TC 200 mg/4 wk            |               | -3.44(-11.77,4.80) |
| IM TC 250 mg/2wk             |               | 4.99(-3.43,13.41)  |
| Durateston, IM, 250 mg/4wk   |               | -3.07(-11.56,5.28) |
| Gel 1% 50 mg/d               | Gel 1% 5 mg/d | 2.88(-5.34,11.08)  |
| Gel 1% 75 mg/d               |               | 2.83(-6.84,12.54)  |
| Gel 1% 100 mg/d              |               | 6.10(-2.30,14.48)  |
| Gel 2% 60 mg/d               |               | 16.10(5.47,26.65)  |
| Gel 2.5%, 125 mg/d           |               | 4.78(-6.22,15.83)  |
| Gel (scrotal) 2.5%, 25 mg/d  |               | 0.53(-10.48,11.48) |
| Solution 2%, 60 mg/d         |               | 4.81(-6.33,15.99)  |
| Oral TU 120 mg/d             |               | 0.66(-9.98,11.41)  |
| Oral TU 160 mg/d             |               | -2.26(-10.97,6.42) |
| Oral TU 120-160 mg/d         |               | 2.02(-8.54,12.63)  |
| Testosterone pellets 1200 mg |               | -0.89(-11.28,9.45) |
| IM TU 1000 mg/9 wk           |               | 12.66(0.32,24.84)  |
| IM TU 1000 mg/10 wk          |               | 2.04(-7.64,11.75)  |
| IM TU 1000 mg/12 wk          |               | 4.79(-3.47,12.95)  |
| IM TE 100 mg/wk              |               | 5.86(-3.72,15.40)  |
| IM TE 125 mg/wk              |               | 3.10(-9.72,15.94)  |
| IM TE 150 mg/2wk             |               | 9.05(-2.41,20.56)  |
| IM TE 200 mg/2wk             |               | 7.01(-2.27,16.13)  |
| IM TE 250 mg/3wk             |               | 4.67(-4.87,14.18)  |

|                              |                |                     |
|------------------------------|----------------|---------------------|
| IM TE 300 mg/3wk             |                | 14.60(3.17,26.00)   |
| IM TE 50-400 mg/1-2 wk       |                | 11.08(-2.35,24.44)  |
| IM TC 200 mg/2 wk            |                | -0.46(-12.22,11.21) |
| IM TC 200 mg/4 wk            |                | -2.37(-13.33,8.57)  |
| IM TC 250 mg/2wk             |                | 6.07(-5.05,17.18)   |
| Durateston, IM, 250 mg/4wk   |                | -1.99(-13.08,9.06)  |
| Gel 1% 75 mg/d               | Gel 1% 50 mg/d | -0.05(-6.06,5.96)   |
| Gel 1% 100 mg/d              |                | 3.22(0.05,6.36)     |
| Gel 2% 60 mg/d               |                | 13.22(5.72,20.65)   |
| Gel 2.5%, 125 mg/d           |                | 1.90(-5.89,9.68)    |
| Gel (scrotal) 2.5%, 25 mg/d  |                | -2.35(-10.23,5.47)  |
| Solution 2%, 60 mg/d         |                | 1.93(-6.45,10.21)   |
| Oral TU 120 mg/d             |                | -2.22(-9.89,5.36)   |
| Oral TU 160 mg/d             |                | -5.14(-9.50,-0.83)  |
| Oral TU 120-160 mg/d         |                | -0.86(-8.26,6.53)   |
| Testosterone pellets 1200 mg |                | -3.77(-10.93,3.32)  |
| IM TU 1000 mg/9 wk           |                | 9.78(0.12,19.31)    |
| IM TU 1000 mg/10 wk          |                | -0.84(-6.93,5.22)   |
| IM TU 1000 mg/12 wk          |                | 1.91(-1.49,5.22)    |
| IM TE 100 mg/wk              |                | 2.98(-2.97,8.82)    |
| IM TE 125 mg/wk              |                | 0.22(-10.17,10.56)  |
| IM TE 150 mg/2wk             |                | 6.17(-2.50,14.84)   |
| IM TE 200 mg/2wk             |                | 4.13(-0.98,9.17)    |
| IM TE 250 mg/3wk             |                | 1.79(-4.11,7.62)    |
| IM TE 300 mg/3wk             |                | 11.72(3.13,20.20)   |
| IM TE 50-400 mg/1-2 wk       |                | 8.20(-2.93,19.12)   |
| IM TC 200 mg/2 wk            |                | -3.34(-12.34,5.62)  |
| IM TC 200 mg/4 wk            |                | -5.25(-13.24,2.71)  |
| IM TC 250 mg/2wk             |                | 3.19(-4.96,11.30)   |
| Durateston, IM, 250 mg/4wk   |                | -4.87(-13.08,3.23)  |
| Gel 1% 100 mg/d              | Gel 1% 75 mg/d | 3.26(-3.00,9.49)    |
| Gel 2% 60 mg/d               |                | 13.27(4.21,22.29)   |
| Gel 2.5%, 125 mg/d           |                | 1.95(-7.52,11.42)   |
| Gel (scrotal) 2.5%, 25 mg/d  |                | -2.30(-11.80,7.19)  |
| Solution 2%, 60 mg/d         |                | 1.98(-7.79,11.68)   |
| Oral TU 120 mg/d             |                | -2.17(-11.46,7.10)  |
| Oral TU 160 mg/d             |                | -5.09(-11.81,1.62)  |
| Oral TU 120-160 mg/d         |                | -0.81(-9.76,8.21)   |
| Testosterone pellets 1200 mg |                | -3.72(-12.49,5.06)  |
| IM TU 1000 mg/9 wk           |                | 9.83(-1.12,20.61)   |
| IM TU 1000 mg/10 wk          |                | -0.79(-8.71,7.09)   |
| IM TU 1000 mg/12 wk          |                | 1.96(-4.14,8.02)    |

|                              |                 |                       |
|------------------------------|-----------------|-----------------------|
| IM TE 100 mg/wk              |                 | 3.03(-4.78,10.84)     |
| IM TE 125 mg/wk              |                 | 0.27(-11.29,11.76)    |
| IM TE 150 mg/2wk             |                 | 6.21(-3.81,16.26)     |
| IM TE 200 mg/2wk             |                 | 4.18(-3.13,11.49)     |
| IM TE 250 mg/3wk             |                 | 1.84(-5.91,9.60)      |
| IM TE 300 mg/3wk             |                 | 11.76(1.77,21.71)     |
| IM TE 50-400 mg/1-2 wk       |                 | 8.25(-3.95,20.40)     |
| IM TC 200 mg/2 wk            |                 | -3.30(-13.57,7.03)    |
| IM TC 200 mg/4 wk            |                 | -5.20(-14.75,4.38)    |
| IM TC 250 mg/2wk             |                 | 3.24(-6.31,12.84)     |
| Durateston, IM, 250 mg/4wk   |                 | -4.82(-14.54,4.73)    |
| Gel 2% 60 mg/d               | Gel 1% 100 mg/d | 10.00(2.31,17.65)     |
| Gel 2.5%, 125 mg/d           |                 | -1.32(-9.14,6.53)     |
| Gel (scrotal) 2.5%, 25 mg/d  |                 | -5.57(-13.46,2.30)    |
| Solution 2%, 60 mg/d         |                 | -1.29(-9.81,7.12)     |
| Oral TU 120 mg/d             |                 | -5.43(-13.31,2.41)    |
| Oral TU 160 mg/d             |                 | -8.35(-13.01,-3.72)   |
| Oral TU 120-160 mg/d         |                 | -4.07(-11.66,3.46)    |
| Testosterone pellets 1200 mg |                 | -6.98(-14.31,0.32)    |
| IM TU 1000 mg/9 wk           |                 | 6.56(-3.21,16.30)     |
| IM TU 1000 mg/10 wk          |                 | -4.05(-10.36,2.25)    |
| IM TU 1000 mg/12 wk          |                 | -1.30(-5.08,2.39)     |
| IM TE 100 mg/wk              |                 | -0.24(-6.33,5.86)     |
| IM TE 125 mg/wk              |                 | -3.00(-13.56,7.45)    |
| IM TE 150 mg/2wk             |                 | 2.95(-5.87,11.76)     |
| IM TE 200 mg/2wk             |                 | 0.91(-4.37,6.24)      |
| IM TE 250 mg/3wk             |                 | -1.43(-7.51,4.70)     |
| IM TE 300 mg/3wk             |                 | 8.50(-0.26,17.19)     |
| IM TE 50-400 mg/1-2 wk       |                 | 4.99(-6.29,16.05)     |
| IM TC 200 mg/2 wk            |                 | -6.56(-15.67,2.62)    |
| IM TC 200 mg/4 wk            |                 | -8.46(-16.58,-0.35)   |
| IM TC 250 mg/2wk             |                 | -0.03(-8.32,8.21)     |
| Durateston, IM, 250 mg/4wk   |                 | -8.09(-16.37,0.19)    |
| Gel 2.5%, 125 mg/d           | Gel 2% 60 mg/d  | -11.32(-21.81,-0.76)  |
| Gel (scrotal) 2.5%, 25 mg/d  |                 | -15.57(-26.01,-5.14)  |
| Solution 2%, 60 mg/d         |                 | -11.29(-22.04,-0.61)  |
| Oral TU 120 mg/d             |                 | -15.44(-25.55,-5.26)  |
| Oral TU 160 mg/d             |                 | -18.36(-26.38,-10.40) |
| Oral TU 120-160 mg/d         |                 | -14.08(-24.01,-4.07)  |
| Testosterone pellets 1200 mg |                 | -16.99(-26.76,-7.21)  |
| IM TU 1000 mg/9 wk           |                 | -3.44(-15.22,8.28)    |
| IM TU 1000 mg/10 wk          |                 | -14.06(-23.21,-4.99)  |

|                              |                             |                      |
|------------------------------|-----------------------------|----------------------|
| IM TU 1000 mg/12 wk          |                             | -11.31(-18.81,-3.79) |
| IM TE 100 mg/wk              |                             | -10.24(-19.18,-1.26) |
| IM TE 125 mg/wk              |                             | -13.00(-25.43,-0.67) |
| IM TE 150 mg/2wk             |                             | -7.05(-18.02,3.89)   |
| IM TE 200 mg/2wk             |                             | -9.09(-17.56,-0.59)  |
| IM TE 250 mg/3wk             |                             | -11.43(-20.28,-2.55) |
| IM TE 300 mg/3wk             |                             | -1.50(-12.41,9.29)   |
| IM TE 50-400 mg/1-2 wk       |                             | -5.02(-17.95,7.94)   |
| IM TC 200 mg/2 wk            |                             | -16.56(-27.65,-5.38) |
| IM TC 200 mg/4 wk            |                             | -18.47(-28.79,-7.99) |
| IM TC 250 mg/2wk             |                             | -10.03(-20.60,0.55)  |
| Durateston, IM, 250 mg/4wk   |                             | -18.09(-28.55,-7.51) |
| Gel (scrotal) 2.5%, 25 mg/d  | Gel 2.5%, 125 mg/d          | -4.25(-11.32,2.85)   |
| Solution 2%, 60 mg/d         |                             | 0.03(-11.01,11.05)   |
| Oral TU 120 mg/d             |                             | -4.11(-14.77,6.43)   |
| Oral TU 160 mg/d             |                             | -7.03(-15.56,1.49)   |
| Oral TU 120-160 mg/d         |                             | -2.75(-13.20,7.62)   |
| Testosterone pellets 1200 mg |                             | -5.67(-15.93,4.50)   |
| IM TU 1000 mg/9 wk           |                             | 7.88(-4.23,19.98)    |
| IM TU 1000 mg/10 wk          |                             | -2.74(-12.35,6.74)   |
| IM TU 1000 mg/12 wk          |                             | 0.02(-8.05,8.09)     |
| IM TE 100 mg/wk              |                             | 1.08(-8.38,10.49)    |
| IM TE 125 mg/wk              |                             | -1.68(-14.40,11.04)  |
| IM TE 150 mg/2wk             |                             | 4.27(-7.05,15.61)    |
| IM TE 200 mg/2wk             |                             | 2.23(-6.41,10.86)    |
| IM TE 250 mg/3wk             |                             | -0.11(-9.59,9.27)    |
| IM TE 300 mg/3wk             |                             | 9.82(-1.46,21.10)    |
| IM TE 50-400 mg/1-2 wk       |                             | 6.31(-7.08,19.61)    |
| IM TC 200 mg/2 wk            |                             | -5.24(-16.86,6.39)   |
| IM TC 200 mg/4 wk            |                             | -7.14(-18.05,3.70)   |
| IM TC 250 mg/2wk             |                             | 1.29(-9.68,12.14)    |
| Durateston, IM, 250 mg/4wk   |                             | -6.77(-17.77,4.17)   |
| Solution 2%, 60 mg/d         | Gel (scrotal) 2.5%, 25 mg/d | 4.28(-6.76,15.29)    |
| Oral TU 120 mg/d             |                             | 0.13(-10.41,10.69)   |
| Oral TU 160 mg/d             |                             | -2.79(-11.32,5.78)   |
| Oral TU 120-160 mg/d         |                             | 1.49(-8.95,11.85)    |
| Testosterone pellets 1200 mg |                             | -1.42(-11.69,8.77)   |
| IM TU 1000 mg/9 wk           |                             | 12.13(-0.05,24.28)   |
| IM TU 1000 mg/10 wk          |                             | 1.51(-8.10,11.01)    |
| IM TU 1000 mg/12 wk          |                             | 4.26(-3.85,12.36)    |
| IM TE 100 mg/wk              |                             | 5.33(-4.13,14.73)    |
| IM TE 125 mg/wk              |                             | 2.57(-10.20,15.23)   |

|                              |                      |                     |
|------------------------------|----------------------|---------------------|
| IM TE 150 mg/2wk             |                      | 8.52(-2.86,19.92)   |
| IM TE 200 mg/2wk             |                      | 6.48(-2.21,15.12)   |
| IM TE 250 mg/3wk             |                      | 4.14(-5.23,13.54)   |
| IM TE 300 mg/3wk             |                      | 14.07(2.81,25.31)   |
| IM TE 50-400 mg/1-2 wk       |                      | 10.55(-2.91,23.84)  |
| IM TC 200 mg/2 wk            |                      | -0.99(-12.60,10.58) |
| IM TC 200 mg/4 wk            |                      | -2.90(-13.82,8.03)  |
| IM TC 250 mg/2wk             |                      | 5.54(-5.44,16.60)   |
| Durateston, IM, 250 mg/4wk   |                      | -2.52(-13.52,8.43)  |
| Oral TU 120 mg/d             | Solution 2%, 60 mg/d | -4.15(-14.97,6.71)  |
| Oral TU 160 mg/d             |                      | -7.07(-15.82,1.75)  |
| Oral TU 120-160 mg/d         |                      | -2.79(-13.42,7.91)  |
| Testosterone pellets 1200 mg |                      | -5.70(-16.19,4.77)  |
| IM TU 1000 mg/9 wk           |                      | 7.85(-4.39,20.17)   |
| IM TU 1000 mg/10 wk          |                      | -2.77(-12.56,7.00)  |
| IM TU 1000 mg/12 wk          |                      | -0.02(-8.34,8.36)   |
| IM TE 100 mg/wk              |                      | 1.05(-8.64,10.74)   |
| IM TE 125 mg/wk              |                      | -1.71(-14.70,11.26) |
| IM TE 150 mg/2wk             |                      | 4.24(-7.33,15.76)   |
| IM TE 200 mg/2wk             |                      | 2.20(-6.98,11.47)   |
| IM TE 250 mg/3wk             |                      | -0.14(-9.75,9.50)   |
| IM TE 300 mg/3wk             |                      | 9.79(-1.75,21.38)   |
| IM TE 50-400 mg/1-2 wk       |                      | 6.27(-7.18,19.70)   |
| IM TC 200 mg/2 wk            |                      | -5.27(-17.13,6.58)  |
| IM TC 200 mg/4 wk            |                      | -7.17(-18.19,4.01)  |
| IM TC 250 mg/2wk             |                      | 1.26(-9.92,12.47)   |
| Durateston, IM, 250 mg/4wk   |                      | -6.80(-17.95,4.39)  |
| Oral TU 160 mg/d             | Oral TU 120 mg/d     | -2.92(-11.18,5.30)  |
| Oral TU 120-160 mg/d         |                      | 1.36(-8.75,11.51)   |
| Testosterone pellets 1200 mg |                      | -1.55(-11.47,8.35)  |
| IM TU 1000 mg/9 wk           |                      | 11.99(0.22,23.80)   |
| IM TU 1000 mg/10 wk          |                      | 1.38(-7.80,10.65)   |
| IM TU 1000 mg/12 wk          |                      | 4.13(-3.60,11.79)   |
| IM TE 100 mg/wk              |                      | 5.20(-3.98,14.29)   |
| IM TE 125 mg/wk              |                      | 2.44(-10.06,15.00)  |
| IM TE 150 mg/2wk             |                      | 8.38(-2.65,19.47)   |
| IM TE 200 mg/2wk             |                      | 6.35(-2.24,15.06)   |
| IM TE 250 mg/3wk             |                      | 4.01(-5.04,13.13)   |
| IM TE 300 mg/3wk             |                      | 13.93(2.85,24.90)   |
| IM TE 50-400 mg/1-2 wk       |                      | 10.42(-2.47,23.36)  |
| IM TC 200 mg/2 wk            |                      | -1.13(-12.50,10.16) |
| IM TC 200 mg/4 wk            |                      | -3.03(-13.54,7.52)  |

|                              |                              |                    |
|------------------------------|------------------------------|--------------------|
| IM TC 250 mg/2wk             |                              | 5.41(-5.24,16.03)  |
| Durateston, IM, 250 mg/4wk   |                              | -2.65(-13.24,7.90) |
| Oral TU 120-160 mg/d         | Oral TU 160 mg/d             | 4.28(-3.65,12.24)  |
| Testosterone pellets 1200 mg |                              | 1.37(-5.02,7.65)   |
| IM TU 1000 mg/9 wk           |                              | 14.91(5.60,24.22)  |
| IM TU 1000 mg/10 wk          |                              | 4.30(-2.44,10.98)  |
| IM TU 1000 mg/12 wk          |                              | 7.05(2.88,11.22)   |
| IM TE 100 mg/wk              |                              | 8.12(1.58,14.65)   |
| IM TE 125 mg/wk              |                              | 5.36(-5.44,16.14)  |
| IM TE 150 mg/2wk             |                              | 11.30(2.17,20.50)  |
| IM TE 200 mg/2wk             |                              | 9.27(3.31,15.24)   |
| IM TE 250 mg/3wk             |                              | 6.93(1.62,12.24)   |
| IM TE 300 mg/3wk             |                              | 16.85(7.78,25.85)  |
| IM TE 50-400 mg/1-2 wk       |                              | 13.34(1.90,24.69)  |
| IM TC 200 mg/2 wk            |                              | 1.79(-7.65,11.19)  |
| IM TC 200 mg/4 wk            |                              | -0.11(-8.45,8.32)  |
| IM TC 250 mg/2wk             |                              | 8.33(-0.32,16.90)  |
| Durateston, IM, 250 mg/4wk   |                              | 0.27(-8.25,8.73)   |
| Testosterone pellets 1200 mg | Oral TU 120-160 mg/d         | -2.91(-12.66,6.81) |
| IM TU 1000 mg/9 wk           |                              | 10.63(-1.05,22.19) |
| IM TU 1000 mg/10 wk          |                              | 0.02(-8.97,9.02)   |
| IM TU 1000 mg/12 wk          |                              | 2.77(-4.70,10.19)  |
| IM TE 100 mg/wk              |                              | 3.83(-5.07,12.72)  |
| IM TE 125 mg/wk              |                              | 1.08(-11.31,13.34) |
| IM TE 150 mg/2wk             |                              | 7.02(-3.93,18.04)  |
| IM TE 200 mg/2wk             |                              | 4.99(-3.53,13.53)  |
| IM TE 250 mg/3wk             |                              | 2.65(-6.16,11.47)  |
| IM TE 300 mg/3wk             |                              | 12.57(1.68,23.38)  |
| IM TE 50-400 mg/1-2 wk       |                              | 9.06(-3.94,21.88)  |
| IM TC 200 mg/2 wk            |                              | -2.49(-13.64,8.66) |
| IM TC 200 mg/4 wk            |                              | -4.39(-14.76,6.03) |
| IM TC 250 mg/2wk             |                              | 4.05(-6.43,14.57)  |
| Durateston, IM, 250 mg/4wk   |                              | -4.02(-14.52,6.43) |
| IM TU 1000 mg/9 wk           | Testosterone pellets 1200 mg | 13.55(3.98,23.17)  |
| IM TU 1000 mg/10 wk          |                              | 2.93(-5.76,11.79)  |
| IM TU 1000 mg/12 wk          |                              | 5.68(-1.39,12.77)  |
| IM TE 100 mg/wk              |                              | 6.75(-1.86,15.41)  |
| IM TE 125 mg/wk              |                              | 3.99(-8.13,16.03)  |
| IM TE 150 mg/2wk             |                              | 9.93(-0.73,20.72)  |
| IM TE 200 mg/2wk             |                              | 7.90(-0.28,16.12)  |
| IM TE 250 mg/3wk             |                              | 5.56(-0.16,11.31)  |
| IM TE 300 mg/3wk             |                              | 15.48(4.84,26.11)  |



|                            |                     |                      |
|----------------------------|---------------------|----------------------|
| IM TE 50-400 mg/1-2 wk     |                     | 11.97(-0.87,24.56)   |
| IM TC 200 mg/2 wk          |                     | 0.43(-10.60,11.33)   |
| IM TC 200 mg/4 wk          |                     | -1.48(-11.65,8.68)   |
| IM TC 250 mg/2wk           |                     | 6.96(-3.27,17.22)    |
| Durateston, IM, 250 mg/4wk |                     | -1.10(-11.31,9.12)   |
| IM TU 1000 mg/10 wk        | IM TU 1000 mg/9 wk  | -10.62(-21.47,0.34)  |
| IM TU 1000 mg/12 wk        |                     | -7.87(-17.42,1.71)   |
| IM TE 100 mg/wk            |                     | -6.80(-17.58,3.97)   |
| IM TE 125 mg/wk            |                     | -9.56(-23.43,4.23)   |
| IM TE 150 mg/2wk           |                     | -3.61(-16.13,8.87)   |
| IM TE 200 mg/2wk           |                     | -5.65(-16.09,4.77)   |
| IM TE 250 mg/3wk           |                     | -7.99(-15.63,-0.43)  |
| IM TE 300 mg/3wk           |                     | 1.94(-10.58,14.38)   |
| IM TE 50-400 mg/1-2 wk     |                     | -1.57(-15.93,12.57)  |
| IM TC 200 mg/2 wk          |                     | -13.12(-25.76,-0.50) |
| IM TC 200 mg/4 wk          |                     | -15.02(-27.02,-2.97) |
| IM TC 250 mg/2wk           |                     | -6.59(-18.64,5.51)   |
| Durateston, IM, 250 mg/4wk |                     | -14.65(-26.65,-2.55) |
| IM TU 1000 mg/12 wk        | IM TU 1000 mg/10 wk | 2.75(-3.39,8.87)     |
| IM TE 100 mg/wk            |                     | 3.82(-4.02,11.63)    |
| IM TE 125 mg/wk            |                     | 1.06(-10.55,12.59)   |
| IM TE 150 mg/2wk           |                     | 7.00(-3.13,17.12)    |
| IM TE 200 mg/2wk           |                     | 4.97(-2.38,12.33)    |
| IM TE 250 mg/3wk           |                     | 2.63(-5.20,10.43)    |
| IM TE 300 mg/3wk           |                     | 12.55(2.61,22.50)    |
| IM TE 50-400 mg/1-2 wk     |                     | 9.04(-3.15,21.15)    |
| IM TC 200 mg/2 wk          |                     | -2.51(-12.86,7.88)   |
| IM TC 200 mg/4 wk          |                     | -4.41(-13.89,5.12)   |
| IM TC 250 mg/2wk           |                     | 4.03(-5.67,13.61)    |
| Durateston, IM, 250 mg/4wk |                     | -4.03(-13.63,5.52)   |
| IM TE 100 mg/wk            | IM TU 1000 mg/12 wk | 1.07(-4.91,7.00)     |
| IM TE 125 mg/wk            |                     | -1.69(-12.18,8.70)   |
| IM TE 150 mg/2wk           |                     | 4.25(-4.40,13.04)    |
| IM TE 200 mg/2wk           |                     | 2.22(-3.10,7.50)     |
| IM TE 250 mg/3wk           |                     | -0.12(-5.92,5.72)    |
| IM TE 300 mg/3wk           |                     | 9.80(1.20,18.32)     |
| IM TE 50-400 mg/1-2 wk     |                     | 6.29(-4.89,17.26)    |
| IM TC 200 mg/2 wk          |                     | -5.26(-14.26,3.76)   |
| IM TC 200 mg/4 wk          |                     | -7.16(-14.34,0.12)   |
| IM TC 250 mg/2wk           |                     | 1.28(-6.89,9.44)     |
| Durateston, IM, 250 mg/4wk |                     | -6.78(-14.19,0.56)   |
| IM TE 125 mg/wk            | IM TE 100 mg/wk     | -2.76(-14.21,8.71)   |

|                            |                  |                      |
|----------------------------|------------------|----------------------|
| IM TE 150 mg/2wk           |                  | 3.19(-6.80,13.17)    |
| IM TE 200 mg/2wk           |                  | 1.15(-6.03,8.28)     |
| IM TE 250 mg/3wk           |                  | -1.19(-8.76,6.47)    |
| IM TE 300 mg/3wk           |                  | 8.74(-1.14,18.58)    |
| IM TE 50-400 mg/1-2 wk     |                  | 5.22(-6.94,17.26)    |
| IM TC 200 mg/2 wk          |                  | -6.32(-16.59,3.99)   |
| IM TC 200 mg/4 wk          |                  | -8.22(-17.53,1.14)   |
| IM TC 250 mg/2wk           |                  | 0.21(-9.33,9.74)     |
| Durateston, IM, 250 mg/4wk |                  | -7.85(-17.40,1.61)   |
| IM TE 150 mg/2wk           | IM TE 125 mg/wk  | 5.95(-7.16,19.13)    |
| IM TE 200 mg/2wk           |                  | 3.91(-7.29,15.04)    |
| IM TE 250 mg/3wk           |                  | 1.57(-9.82,13.12)    |
| IM TE 300 mg/3wk           |                  | 11.50(-1.54,24.55)   |
| IM TE 50-400 mg/1-2 wk     |                  | 7.98(-6.80,22.76)    |
| IM TC 200 mg/2 wk          |                  | -3.56(-16.94,9.75)   |
| IM TC 200 mg/4 wk          |                  | -5.47(-18.14,7.27)   |
| IM TC 250 mg/2wk           |                  | 2.97(-9.79,15.85)    |
| Durateston, IM, 250 mg/4wk |                  | -5.09(-17.80,7.77)   |
| IM TE 200 mg/2wk           | IM TE 150 mg/2wk | -2.04(-11.66,7.57)   |
| IM TE 250 mg/3wk           |                  | -4.38(-14.31,5.56)   |
| IM TE 300 mg/3wk           |                  | 5.55(-6.15,17.34)    |
| IM TE 50-400 mg/1-2 wk     |                  | 2.04(-11.74,15.72)   |
| IM TC 200 mg/2 wk          |                  | -9.51(-21.66,2.54)   |
| IM TC 200 mg/4 wk          |                  | -11.41(-22.70,0.00)  |
| IM TC 250 mg/2wk           |                  | -2.98(-14.42,8.45)   |
| Durateston, IM, 250 mg/4wk |                  | -11.04(-22.52,0.42)  |
| IM TE 250 mg/3wk           | IM TE 200 mg/2wk | -2.34(-9.48,4.87)    |
| IM TE 300 mg/3wk           |                  | 7.59(-1.89,17.04)    |
| IM TE 50-400 mg/1-2 wk     |                  | 4.07(-7.82,15.86)    |
| IM TC 200 mg/2 wk          |                  | -7.47(-17.31,2.38)   |
| IM TC 200 mg/4 wk          |                  | -9.37(-18.42,-0.35)  |
| IM TC 250 mg/2wk           |                  | -0.94(-9.99,8.19)    |
| Durateston, IM, 250 mg/4wk |                  | -9.00(-18.14,0.03)   |
| IM TE 300 mg/3wk           | IM TE 250 mg/3wk | 9.93(0.08,19.73)     |
| IM TE 50-400 mg/1-2 wk     |                  | 6.41(-5.72,18.40)    |
| IM TC 200 mg/2 wk          |                  | -5.13(-15.34,5.05)   |
| IM TC 200 mg/4 wk          |                  | -7.04(-16.28,2.31)   |
| IM TC 250 mg/2wk           |                  | 1.40(-8.03,10.77)    |
| Durateston, IM, 250 mg/4wk |                  | -6.66(-16.10,2.75)   |
| IM TE 50-400 mg/1-2 wk     | IM TE 300 mg/3wk | -3.51(-17.11,9.98)   |
| IM TC 200 mg/2 wk          |                  | -15.06(-26.99,-3.12) |
| IM TC 200 mg/4 wk          |                  | -16.96(-28.18,-5.70) |

|                            |                        |                      |
|----------------------------|------------------------|----------------------|
| IM TC 250 mg/2wk           |                        | -8.53(-19.81,2.78)   |
| Durateston, IM, 250 mg/4wk |                        | -16.59(-27.91,-5.27) |
| IM TC 200 mg/2 wk          | IM TE 50-400 mg/1-2 wk | -11.55(-25.33,2.34)  |
| IM TC 200 mg/4 wk          |                        | -13.45(-26.71,-0.08) |
| IM TC 250 mg/2wk           |                        | -5.01(-18.35,8.45)   |
| Durateston, IM, 250 mg/4wk |                        | -13.07(-26.35,0.29)  |
| IM TC 200 mg/4 wk          | IM TC 200 mg/2 wk      | -1.90(-13.46,9.66)   |
| IM TC 250 mg/2wk           |                        | 6.53(-5.16,18.17)    |
| Durateston, IM, 250 mg/4wk |                        | -1.53(-13.18,10.07)  |
| IM TC 250 mg/2wk           | IM TC 200 mg/4 wk      | 8.44(-2.47,19.30)    |
| Durateston, IM, 250 mg/4wk |                        | 0.37(-6.93,7.65)     |
| Durateston, IM, 250 mg/4wk | IM TC 250 mg/2wk       | -8.06(-19.21,2.97)   |

**eFigure 6: Odds of myocardial infarction associated with the use of any testosterone v. placebo**

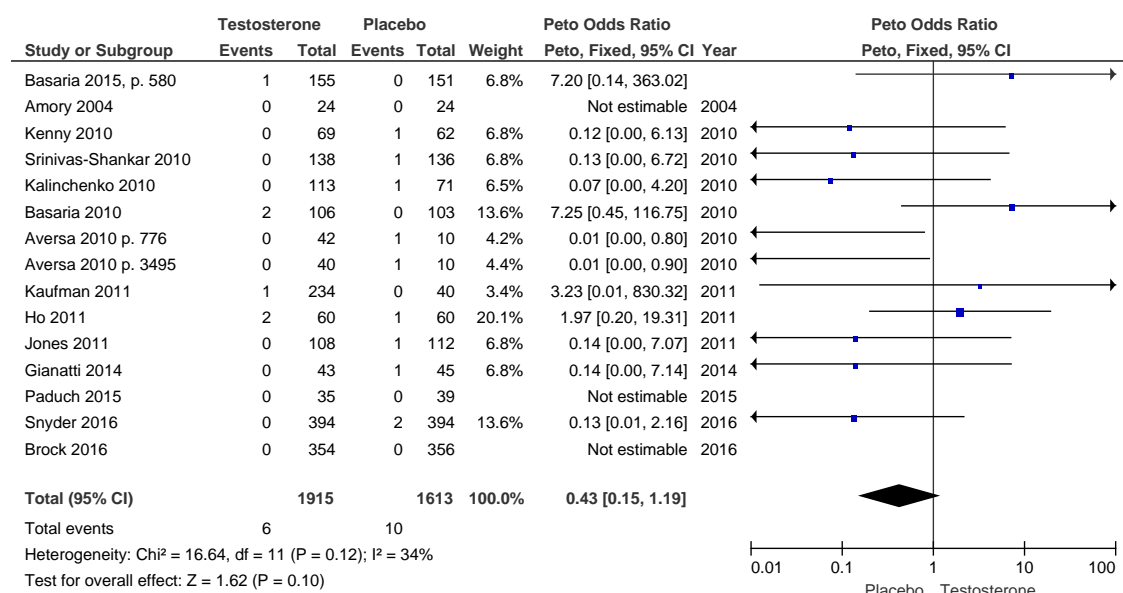

**eFigure 7: Odds of prostate cancer associated with the use of any testosterone v. placebo**

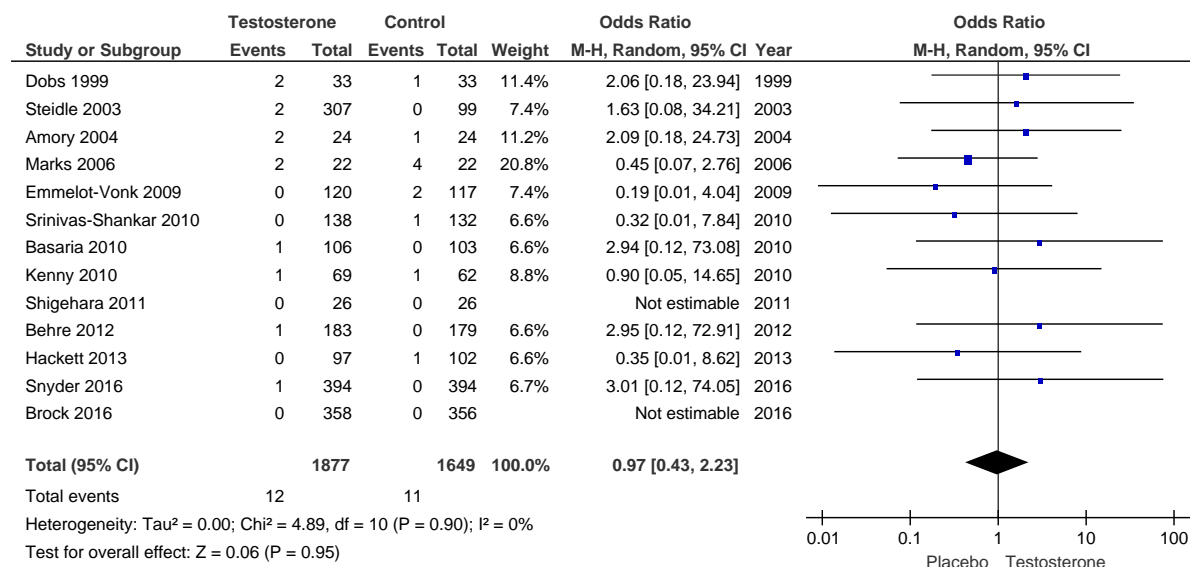

eFigure 8: Odds of serious adverse events: any testosterone v. placebo

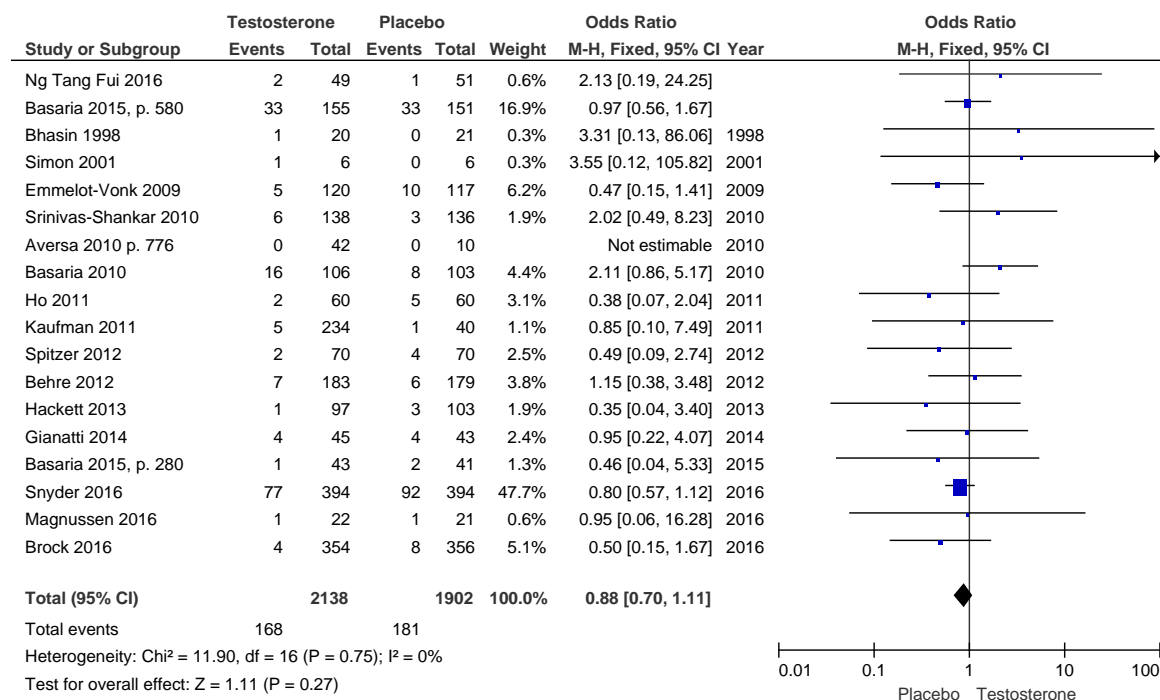

eTable 11: Odds of serious adverse events associated with individual testosterone products – Bayesian network meta-analysis

|                                 | Odds ratio (95% credible interval)* |                      |                      |                      |                         |                         |                      |                         |
|---------------------------------|-------------------------------------|----------------------|----------------------|----------------------|-------------------------|-------------------------|----------------------|-------------------------|
|                                 | Placebo                             | Gel 1%,<br>50 mg/d   | Gel 1%,<br>75 mg/d   | Gel 1%,<br>100 mg/d  | Gel 1.62%,<br>40.5 mg/d | Solution 2%,<br>60 mg/d | Oral TU, 160<br>mg/d | IM TU,<br>1000 mg/12 wk |
| <b>Gel 1%,<br/>50 mg/d</b>      | 0.91<br>(0.46,2.10)                 | —                    |                      |                      |                         |                         |                      |                         |
| <b>Gel 1%,<br/>75 mg/d</b>      | 0.98<br>(0.25,3.55)                 | 1.08<br>(0.21,4.42)  | —                    |                      |                         |                         |                      |                         |
| <b>Gel 1%,<br/>100 mg/d</b>     | 1.41<br>(0.39,4.06)                 | 1.54<br>(0.31,5.25)  | 1.45<br>(0.23,7.53)  | —                    |                         |                         |                      |                         |
| <b>Gel 1.62%,<br/>40.5 mg/d</b> | 1.19<br>(0.11,40.82)                | 1.30<br>(0.10,48.76) | 1.24<br>(0.09,51.17) | 0.89<br>(0.07,35.34) | —                       |                         |                      |                         |
| <b>Solution 2%,<br/>60mg/d</b>  | 0.47<br>(0.08,2.53)                 | 0.51<br>(0.07,3.07)  | 0.48<br>(0.06,4.08)  | 0.34<br>(0.04,2.88)  | 0.38<br>(0.01,7.32)     | —                       |                      |                         |
| <b>Oral TU<br/>160 mg/d</b>     | 0.45<br>(0.08,2.17)                 | 0.49<br>(0.07,2.67)  | 0.46<br>(0.05,3.60)  | 0.32<br>(0.05,2.51)  | 0.36<br>(0.01,6.21)     | 0.94<br>(0.09,10.03)    | —                    |                         |
| <b>IM TU,1000<br/>mg/12 wk</b>  | 0.68<br>(0.23,1.94)                 | 0.74<br>(0.18,2.56)  | 0.69<br>(0.13,3.70)  | 0.48<br>(0.11,2.55)  | 0.56<br>(0.01,7.68)     | 1.43<br>(0.20,11.31)    | 1.50<br>(0.23,10.76) | —                       |

Note: IM = intramuscular injection, TU = testosterone undecanoate.

\*Random effects model. Significant changes are indicated by use of bold and colour (green indicates that the row treatment is significantly better than the column treatment, while red indicates that the row treatment is significantly worse than the column treatment). White indicates no significant difference between treatments. An additional 4 RCTs (Aversa 2010; Schubert 2004; Bhasin 1998; Simon 2001) could not be included in the network because they reported zero events in  $\geq$  treatment groups.

**eFigure 9: Odds of stroke associated with the use of any testosterone v. placebo**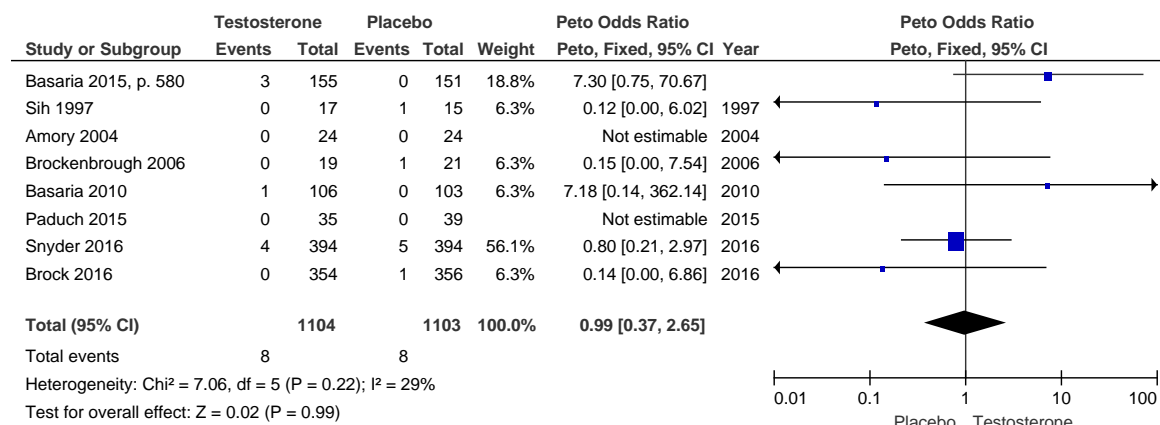**eFigure 10: Odds of heart disease associated with the use of any testosterone v. placebo**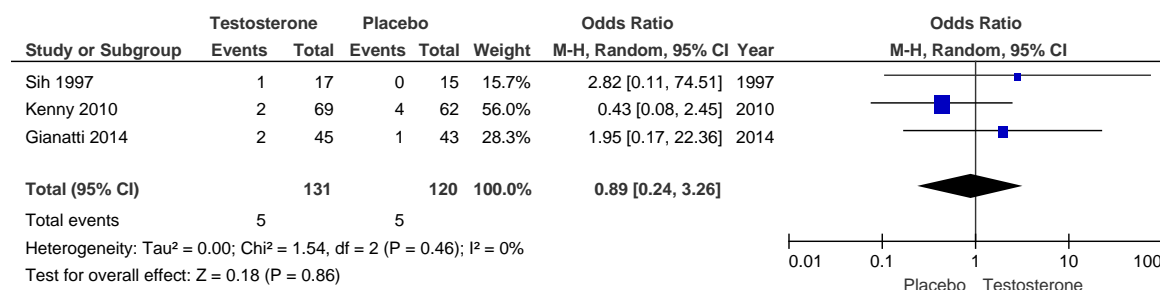**eFigure 11: Odds of erythrocytosis associated with the use of any testosterone v. placebo**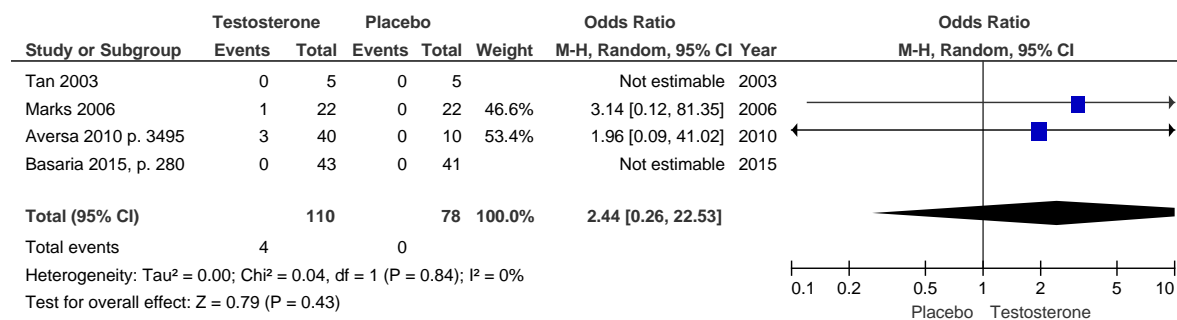

**eFigure 12: Odds of withdrawals due to adverse events associated with the use of any testosterone v. placebo**

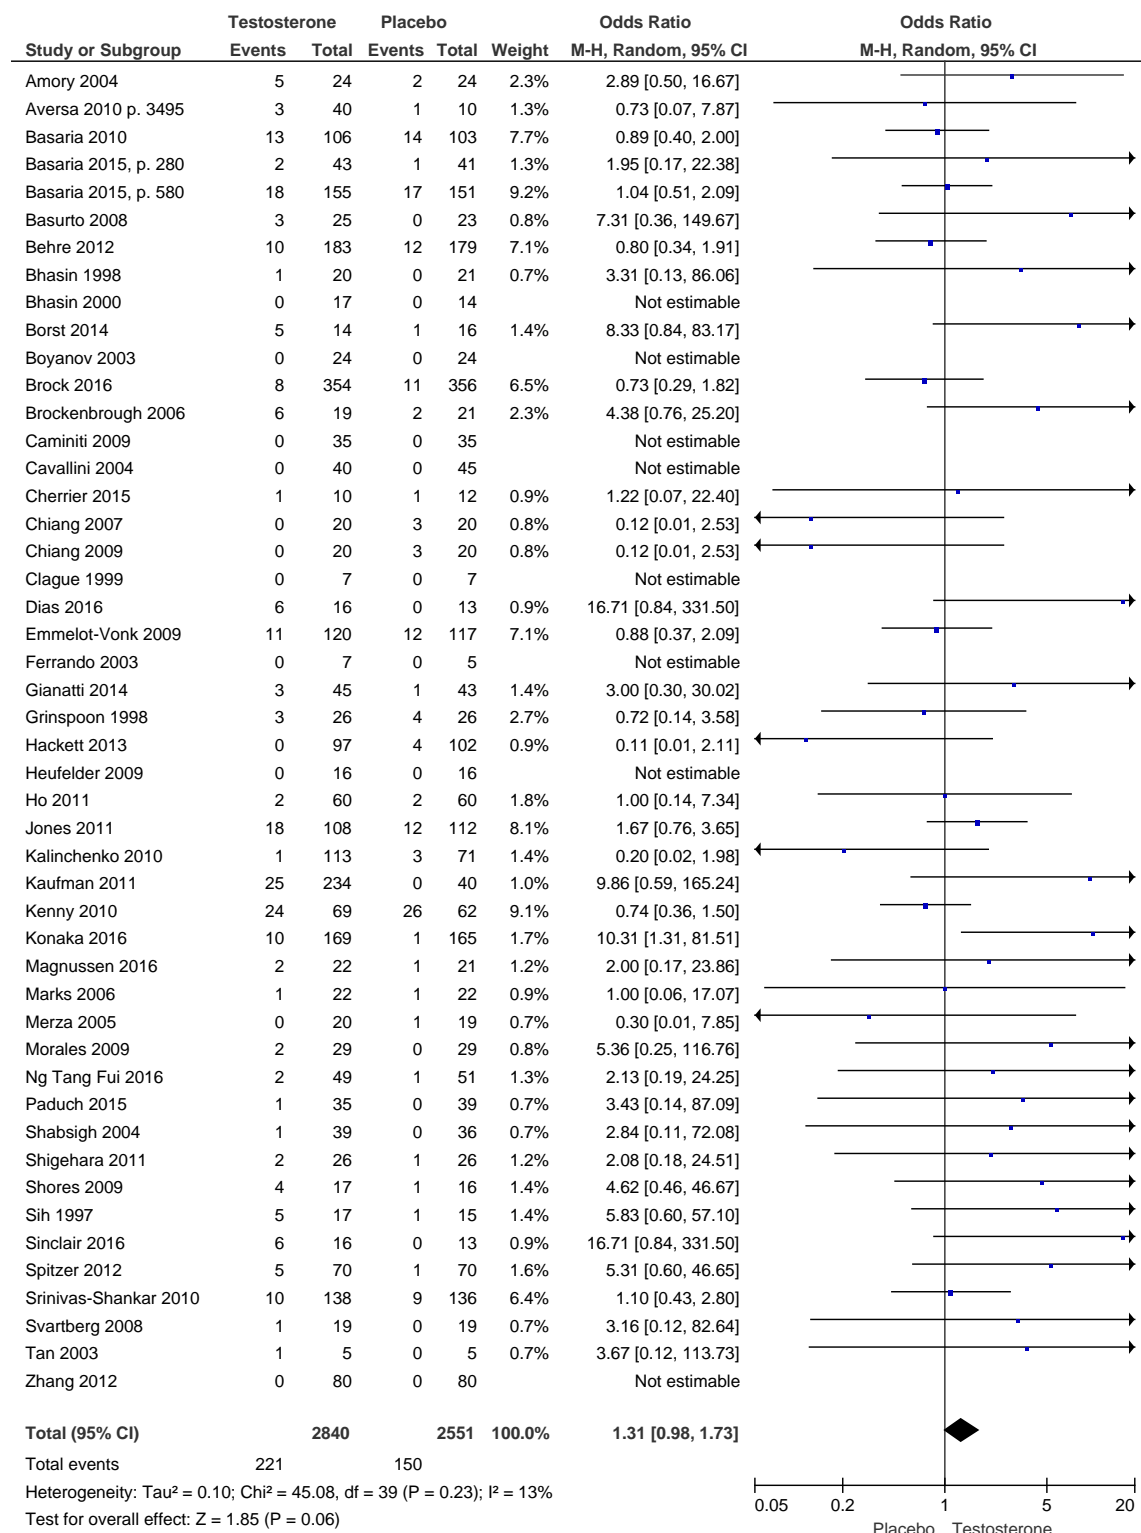

**eTable 12: Odds of withdrawals due to adverse events associated with individual testosterone products – Bayesian network meta-analysis**

|                            | Odds ratio (95% credible interval)* |                                |                                   |                          |                          |                           |                          |                                   |                           |                               |                                   |                         |                           |                           |                           |                           |                           |
|----------------------------|-------------------------------------|--------------------------------|-----------------------------------|--------------------------|--------------------------|---------------------------|--------------------------|-----------------------------------|---------------------------|-------------------------------|-----------------------------------|-------------------------|---------------------------|---------------------------|---------------------------|---------------------------|---------------------------|
|                            | Placebo                             | Patch,<br>5 mg/d               | Gel 1%,<br>5 mg/d                 | Gel 1%,<br>50 mg/d       | Gel 1%,<br>75 mg/d       | Gel 1%,<br>100<br>mg/d    | Gel 2%,<br>60 mg/d       | Solution<br>2%,<br>60 mg/d        | Oral TU<br>160 mg/d       | IM TU,<br>1000<br>mg/10<br>wk | IM TU,<br>1000<br>mg/12<br>wk     | IM TE,<br>125 mg/<br>wk | IM TE,<br>150 mg/<br>2 wk | IM TE,<br>200 mg/<br>2 wk | IM TE,<br>250 mg/<br>4 wk | IM TE,<br>300 mg/<br>3 wk | IM TC,<br>200 mg/<br>2 wk |
| Patch,<br>5 mg/d           | <b>6.82</b><br>(1.66,<br>32.14)     | —                              |                                   |                          |                          |                           |                          |                                   |                           |                               |                                   |                         |                           |                           |                           |                           |                           |
| Gel 1%,<br>5 mg/d          | 0.76<br>(0.27,<br>2.14)             | <b>0.11</b><br>(0.02,<br>0.63) | —                                 |                          |                          |                           |                          |                                   |                           |                               |                                   |                         |                           |                           |                           |                           |                           |
| Gel 1%,<br>50 mg/d         | 1.45<br>(0.77,<br>3.00)             | <b>0.21</b><br>(0.05,<br>0.86) | 1.91<br>(0.59,<br>6.89)           | —                        |                          |                           |                          |                                   |                           |                               |                                   |                         |                           |                           |                           |                           |                           |
| Gel 1%,<br>75 mg/d         | 1.30<br>(0.55,<br>3.57)             | 0.19<br>(0.03,<br>1.07)        | 1.71<br>(0.46,<br>7.48)           | 0.90<br>(0.29,<br>2.85)  | —                        |                           |                          |                                   |                           |                               |                                   |                         |                           |                           |                           |                           |                           |
| Gel 1%,<br>100 mg/d        | 1.03<br>(0.45,<br>2.40)             | <b>0.15</b><br>(0.03,<br>0.64) | 1.36<br>(0.37,<br>5.19)           | 0.71<br>(0.25,<br>1.90)  | 0.79<br>(0.22,<br>2.61)  | —                         |                          |                                   |                           |                               |                                   |                         |                           |                           |                           |                           |                           |
| Solution<br>2%,<br>60 mg/d | 1.64<br>(0.57,<br>4.95)             | 0.24<br>(0.04,<br>1.42)        | 2.18<br>(0.50,<br>9.67)           | 1.14<br>(0.30,<br>3.98)  | 1.26<br>(0.28,<br>4.94)  | 1.60<br>(0.40,<br>6.12)   | —                        |                                   |                           |                               |                                   |                         |                           |                           |                           |                           |                           |
| Gel 2%,<br>60 mg/d         | 0.73<br>(0.21,<br>2.37)             | <b>0.11</b><br>(0.01,<br>0.67) | 0.96<br>(0.19,<br>4.68)           | 0.50<br>(0.12,<br>1.88)  | 0.56<br>(0.11,<br>2.35)  | 0.70<br>(0.16,<br>2.93)   | 0.44<br>(0.08,<br>2.23)  | —                                 |                           |                               |                                   |                         |                           |                           |                           |                           |                           |
| Oral TU 160<br>mg/d        | 0.87<br>(0.28,<br>2.77)             | <b>0.13</b><br>(0.02,<br>0.80) | 1.15<br>(0.25,<br>5.43)           | 0.60<br>(0.15,<br>2.23)  | 0.67<br>(0.14,<br>2.77)  | 0.84<br>(0.20,<br>3.54)   | 0.53<br>(0.11,<br>2.61)  | 1.20<br>(0.23,<br>6.61)           | —                         |                               |                                   |                         |                           |                           |                           |                           |                           |
| IM TU,<br>1000<br>mg/10 wk | 2.14<br>(0.18,<br>33.83)            | 0.31<br>(0.02,<br>7.21)        | 2.85<br>(0.20,<br>53.28)          | 1.48<br>(0.11,<br>24.89) | 1.64<br>(0.12,<br>28.93) | 2.08<br>(0.16,<br>37.59)  | 1.29<br>(0.09,<br>25.16) | 2.95<br>(0.20,<br>59.09)          | 2.47<br>(0.17,<br>49.97)  | —                             |                                   |                         |                           |                           |                           |                           |                           |
| IM TU,<br>1000<br>mg/12 wk | 0.52<br>(0.21,<br>1.26)             | <b>0.08</b><br>(0.01,<br>0.40) | 0.69<br>(0.17,<br>2.72)           | 0.36<br>(0.11,<br>1.05)  | 0.40<br>(0.10,<br>1.36)  | 0.50<br>(0.15,<br>1.68)   | 0.31<br>(0.08,<br>1.28)  | 0.72<br>(0.16,<br>3.21)           | 0.59<br>(0.14,<br>2.52)   | 0.24<br>(0.01,<br>3.42)       | —                                 |                         |                           |                           |                           |                           |                           |
| IM TE,<br>125 mg/<br>wk    | 7.95<br>(0.97,<br>105.20)           | 1.20<br>(0.09,<br>22.88)       | <b>10.65</b><br>(1.03,<br>166.10) | 5.47<br>(0.60,<br>77.02) | 6.08<br>(0.60,<br>90.45) | 7.72<br>(0.80,<br>115.20) | 4.89<br>(0.44,<br>78.95) | <b>11.35</b><br>(1.01,<br>179.70) | 9.32<br>(0.83,<br>152.60) | 3.88<br>(0.11,<br>140.30)     | <b>15.62</b><br>(1.59,<br>244.70) | —                       |                           |                           |                           |                           |                           |

Supplemental Online Content: Elliott et al. Testosterone therapy in hypogonadal men: a systematic review and network meta-analysis.



|                           |                          |                                              |                                               |                          |                          |                                               |                          |                                               |                                               |                          |                                                 |                          |                           |                          |                          |                           |   |
|---------------------------|--------------------------|----------------------------------------------|-----------------------------------------------|--------------------------|--------------------------|-----------------------------------------------|--------------------------|-----------------------------------------------|-----------------------------------------------|--------------------------|-------------------------------------------------|--------------------------|---------------------------|--------------------------|--------------------------|---------------------------|---|
| IM TE,<br>150 mg/<br>2 wk | 1.01<br>(0.04,<br>22.84) | 0.15<br>(0.00,<br>4.20)                      | 1.34<br>(0.05,<br>34.59)                      | 0.70<br>(0.03,<br>16.50) | 0.77<br>(0.03,<br>18.63) | 0.97<br>(0.04,<br>24.53)                      | 0.62<br>(0.02,<br>17.03) | 1.39<br>(0.05,<br>39.21)                      | 1.16<br>(0.05,<br>33.97)                      | 0.46<br>(0.01,<br>25.13) | 1.95<br>(0.08,<br>49.97)                        | 0.12<br>(0.00,<br>4.99)  | —                         |                          |                          |                           |   |
| IM TE,<br>200 mg/<br>2 wk | 2.83<br>(0.49,<br>21.73) | 0.42<br>(0.04,<br>4.94)                      | 3.78<br>(0.49,<br>36.13)                      | 1.96<br>(0.29,<br>16.21) | 2.17<br>(0.28,<br>19.79) | 2.73<br>(0.39,<br>24.40)                      | 1.73<br>(0.22,<br>17.02) | 3.93<br>(0.48,<br>41.61)                      | 3.26<br>(0.40,<br>32.63)                      | 1.38<br>(0.05,<br>28.67) | 5.50<br>(0.74,<br>50.37)                        | 0.35<br>(0.02,<br>6.55)  | 2.92<br>(0.08,<br>107.60) | —                        |                          |                           |   |
| IM TE,<br>250 mg/<br>4 wk | 5.92<br>(1.43,<br>36.28) | 0.89<br>(0.10,<br>8.37)                      | <b>8.05</b><br><b>(1.33,</b><br><b>61.53)</b> | 4.12<br>(0.82,<br>27.64) | 4.61<br>(0.77,<br>32.91) | <b>5.81</b><br><b>(1.08,</b><br><b>41.07)</b> | 3.66<br>(0.59,<br>29.86) | <b>8.31</b><br><b>(1.27,</b><br><b>72.32)</b> | <b>6.95</b><br><b>(1.08,</b><br><b>57.31)</b> | 2.88<br>(0.11,<br>57.41) | 11.75<br>(2.13,<br>84.99)                       | 0.75<br>(0.04,<br>11.64) | 6.10<br>(0.20,<br>202.50) | 2.15<br>(0.18,<br>25.19) | —                        |                           |   |
| IM TE,<br>300 mg/<br>3 wk | 0.72<br>(0.11,<br>4.20)  | <b>0.10</b><br><b>(0.01,</b><br><b>0.99)</b> | 0.93<br>(0.11,<br>7.44)                       | 0.49<br>(0.06,<br>3.19)  | 0.54<br>(0.07,<br>3.89)  | 0.69<br>(0.09,<br>4.94)                       | 0.43<br>(0.05,<br>3.45)  | 0.98<br>(0.10,<br>8.51)                       | 0.82<br>(0.09,<br>7.04)                       | 0.33<br>(0.01,<br>6.96)  | 1.38<br>(0.18,<br>10.17)                        | 0.09<br>(0.00,<br>1.40)  | 0.71<br>(0.02,<br>23.91)  | 0.24<br>(0.02,<br>2.99)  | 0.12<br>(0.01,<br>1.18)  | —                         |   |
| IM TC,<br>200 mg/<br>2 wk | 5.77<br>(0.72,<br>76.47) | 0.85<br>(0.06,<br>15.32)                     | 7.73<br>(0.72,<br>116.20)                     | 3.98<br>(0.43,<br>54.25) | 4.37<br>(0.43,<br>64.41) | 5.53<br>(0.60,<br>78.93)                      | 3.52<br>(0.33,<br>54.96) | 8.03<br>(0.71,<br>131.40)                     | 6.60<br>(0.62,<br>104.30)                     | 2.73<br>(0.09,<br>84.03) | <b>11.06</b><br><b>(1.15,</b><br><b>170.30)</b> | 0.72<br>(0.03,<br>19.57) | 5.92<br>(0.14,<br>282.40) | 2.07<br>(0.10,<br>43.57) | 0.95<br>(0.06,<br>17.27) | 8.60<br>(0.51,<br>180.50) | — |

Note: IM = intramuscular injection, TC = testosterone cypionate, TE = testosterone enanthate, TU = testosterone undecanoate.

\*Random-effects model. Significant changes are indicated by use of bold and colour (green indicates that the row treatment is significantly better than the column treatment, which red indicates that the row treatment is significantly worse than the column treatment). White indicates no significant difference between treatments. An additional 23 studies (Basurto 2008, Bhasin 1998 (p. 140), Bhasin 1998 (p. 3155), Boyanov 2003, Caminiti 2009, Cavallini 2004, Chiang 2007, Chiang 2009, Clague 1999, Dobs 1999, Ferrando 2003, Hackett 2013, Heufelder 2009, Kaufman 2011, Merza 2005, Morales 2009, Schubert 2004, Shabsigh 2004, Svartberg 2008, Tan 2003, Zhang 2012, Dias 2016, Paduch 2015) were removed from the network meta-analysis because zero events were reported in one or both groups.

**eTable 13: Summary of harms outcomes reported in non-randomized studies**

| Author, year                | Population                                                      | Treatment (no. in group)                                                                                                                                                                                     | Outcome                                                                                                                                                                                                                                                                                | Comments                                                                                                                                                                                            |
|-----------------------------|-----------------------------------------------------------------|--------------------------------------------------------------------------------------------------------------------------------------------------------------------------------------------------------------|----------------------------------------------------------------------------------------------------------------------------------------------------------------------------------------------------------------------------------------------------------------------------------------|-----------------------------------------------------------------------------------------------------------------------------------------------------------------------------------------------------|
| <b>Retrospective cohort</b> |                                                                 |                                                                                                                                                                                                              |                                                                                                                                                                                                                                                                                        |                                                                                                                                                                                                     |
| <b>Cheetham 2017</b>        | ≥ 40 yr with documented androgen deficiency                     | <ul style="list-style-type: none"> <li>• Ever TRT (8,808)</li> <li>• Never TRT (35,527)</li> </ul> <p>Mean follow-up: 4.4 years (median 3.4 years, IQR, 1.7-6.5 years)</p>                                   | <ul style="list-style-type: none"> <li>• Stroke: AHR 0.64 (95% CI 0.52, 0.80)</li> <li>• Acute MI: AHR 0.74 (95% CI 0.63, 0.86)</li> <li>• CVD: AHR 0.76 (95% CI 0.61, 0.93)</li> </ul>                                                                                                | Entry into cohort was based on filling a prescription for TRT (patch 13.6%, gel 34.7%, injectable 51.6%).                                                                                           |
| <b>Layton 2015</b>          | New users of TRT                                                | <ul style="list-style-type: none"> <li>• Gel (109,810)</li> <li>• Injection (103,555)</li> <li>• Patch (9,255)</li> </ul> <p>Mean treatment duration between 96 days (patch) and 122 days (injection)</p>    | <ul style="list-style-type: none"> <li>• Injection v. gel</li> <li>• MI: AHR 1.64 (95% CI 0.57, 4.69)</li> <li>• Stroke: AHR 1.28 (0.27, 6.02)</li> </ul>                                                                                                                              | No significant difference in MI or stroke between injection and gel users. No data available for patch v. injection or gel users.                                                                   |
| <b>Pastuszak 2015</b>       | New TRT users or had been off TRT for ≥ 3 or mo                 | <ul style="list-style-type: none"> <li>• Gel (1% 50–100mg/d or 1.62% 20.25–80.1 mg/d) (47)</li> <li>• IM TE or TC, 100–200mg/wk (57)</li> <li>• Pellets (75mg/3–6 mo) (74)</li> </ul> <p>Duration: 36 mo</p> | <ul style="list-style-type: none"> <li>• Erythrocytosis: Gel: 12.8% of patients Injection: T 66.7% Pellets: 35.1%</li> <li>• Prostate cancer: 1 case of prostate cancer diagnosed in pellet group. No new cases of prostate cancer among men with previous prostate cancer.</li> </ul> | Erythrocytosis defined as hematocrit ≥50%; Erythrocytosis occurred significantly earlier in the injection group (10.5±9.1 mo) compared with the gel (14.0±12.6 mo) or pellet (16.4 ±10.7mo) groups. |
| <b>Ramasamy 2015</b>        | ≥ 65 yr and ≥3 hypogonadal symptoms                             | <ul style="list-style-type: none"> <li>• TRT, dose NR (153)</li> <li>• No TRT, dose NR (64)</li> </ul> <p>Duration: Median follow-up 3.8 (TRT) v. 3.4 yr (TRT)</p>                                           | <ul style="list-style-type: none"> <li>• MI: 1 event in TRT group v. 0 in no TRT group</li> <li>• Stroke: 2 events in TRT v. 1 in no TRT group</li> </ul>                                                                                                                              | All events (except 1 death which took place after 6 months of follow-up) occurred after 2 or more years.                                                                                            |
| <b>Vigen 2013</b>           | Men who underwent coronary angiography                          | <ul style="list-style-type: none"> <li>• TRT, dose NR (1223)</li> <li>• No TRT (7486)</li> </ul> <p>Mean follow-up: 840 d</p>                                                                                | <ul style="list-style-type: none"> <li>• Cardiovascular events†: AHR 1.29, 95% CI 1.04 to 1.58</li> </ul>                                                                                                                                                                              | Entry into cohort was based on filling a prescription for TRT (patch, gel, or injectable). Data reported as TRT v. no TRT. Length of follow-up differed by group.                                   |
| <b>Shores 2012</b>          | > 40 yr treated at a VA medical center, inpatient or outpatient | <ul style="list-style-type: none"> <li>• No TRT (633)</li> <li>• TRT (398)</li> </ul> <p>Duration: 20.2 mo</p>                                                                                               | <ul style="list-style-type: none"> <li>• Prostate cancer: No treatment: 13/633 men; TRT: 7/398 men</li> </ul>                                                                                                                                                                          | Data reported as TRT v. no TRT. TRTs included injectable, patch, or gel.                                                                                                                            |
| <b>Rhoden 2006</b>          | Negative prostate biopsy prior to starting TRT                  | <ul style="list-style-type: none"> <li>• IM testosterone, dose and type NR (33)</li> <li>• Gel 1%, dose NR (25)</li> </ul> <p>Duration: 12 mo</p>                                                            | <ul style="list-style-type: none"> <li>• Prostate cancer: 1 case in the IM group</li> </ul>                                                                                                                                                                                            |                                                                                                                                                                                                     |
| <b>Guay 2000</b>            | Men with ED and primary or secondary hypogonadism               | <ul style="list-style-type: none"> <li>• IM TE, 200–300 mg/2–3 wk (25)</li> <li>• Patch, 5 mg/d (16)</li> </ul>                                                                                              | <ul style="list-style-type: none"> <li>• Prostate cancer: 3 cases (NR to which treatment group the patients belonged)</li> </ul>                                                                                                                                                       |                                                                                                                                                                                                     |

| Duration: 2–3 mo       |                                                                    |                                                                                                                                                                                        |                                                                                                                                                                                                                                                                                          |                                                                                                                                                                        |
|------------------------|--------------------------------------------------------------------|----------------------------------------------------------------------------------------------------------------------------------------------------------------------------------------|------------------------------------------------------------------------------------------------------------------------------------------------------------------------------------------------------------------------------------------------------------------------------------------|------------------------------------------------------------------------------------------------------------------------------------------------------------------------|
| Prospective cohort     |                                                                    |                                                                                                                                                                                        |                                                                                                                                                                                                                                                                                          |                                                                                                                                                                        |
| <b>Debruyne 2017</b>   | ≥18 yr with a diagnosis of hypogonadism                            | <ul style="list-style-type: none"> <li>• TRT, dose NR (750)</li> <li>• No TRT (249)</li> </ul> Duration: 36 mo (23,900 person-mo)                                                      | <ul style="list-style-type: none"> <li>• Prostate cancer: incidence rate ratio 0.52 (95% CI 0.22 to 1.26)</li> </ul>                                                                                                                                                                     | 68% of TRT users received topical gels, 31% injectables, and 2% oral products                                                                                          |
| <b>Traish 2017</b>     | Symptoms of hypogonadism                                           | <ul style="list-style-type: none"> <li>• TU, 1000mg/12wk (360)</li> <li>• No TRT (296)</li> </ul> Median follow-up: 7 yr                                                               | <ul style="list-style-type: none"> <li>• CVD: 0 in TU group v. 19 in no TRT group</li> <li>• Nonfatal MI: 0 in TU group v. 26 in no TRT group</li> <li>• Nonfatal stroke: 0 in TU group v. 30 in no TRT group</li> <li>• Prostate cancer: 7 in TU group v. 12 in no TRT group</li> </ul> | CVD in no TRT group attributed to MI (5), stroke (4), heart failure (7), thromboembolism (2), lung embolism (1), and pneumonia and lung failure (1)                    |
| <b>Yassin 2017</b>     | Treated or untreated hypogonadal men                               | <ul style="list-style-type: none"> <li>• TRT, dose NR (42)</li> <li>• No treatment (162)</li> </ul> Duration: 6 yr                                                                     | <ul style="list-style-type: none"> <li>• Prostate cancer: 7 (16.7%) in TRT group vs. 84 (51.9%) in untreated group</li> </ul>                                                                                                                                                            | Data reported as a positive biopsy for prostate cancer; lower severity of prostate cancer in terms of staging and grading in the TRT group than in the untreated group |
| <b>Jung 2016</b>       | Symptoms of hypogonadism                                           | <ul style="list-style-type: none"> <li>• TU, 1000 mg/3 mo + lifestyle modification (54)</li> <li>• Lifestyle modification (52)</li> </ul> Treatment duration: 8 mo                     | <ul style="list-style-type: none"> <li>• Prostate cancer: 0 in both groups</li> <li>• MI: 0 in both groups</li> <li>• Stroke: 0 in both groups</li> </ul>                                                                                                                                | Prospective, controlled study                                                                                                                                          |
| <b>Francomano 2014</b> | Severely obese men (mean BMI 42) with ≥ 2 symptoms of hypogonadism | <ul style="list-style-type: none"> <li>• DPE (12)</li> <li>• DPE + IM TU, 1000 mg/12 wk (12)</li> </ul> Duration: 54 wk + 24 wk observational period following withdrawal of treatment | <ul style="list-style-type: none"> <li>• WAE: zero in both groups</li> <li>• SAE: zero in both groups</li> </ul>                                                                                                                                                                         |                                                                                                                                                                        |
| <b>Aydogdu 2013</b>    | IHH                                                                | <ul style="list-style-type: none"> <li>• Sustanon, 250 mg/3wk (28)</li> <li>• Gel 1%, 50 mg/d (24)</li> </ul> Duration: 24 wk                                                          | <ul style="list-style-type: none"> <li>• SAE: zero in all groups</li> </ul>                                                                                                                                                                                                              |                                                                                                                                                                        |
| <b>Blick 2013</b>      | HIV/AIDS                                                           | <ul style="list-style-type: none"> <li>• Androgel 1%, gel, 50 mg/d (92)</li> <li>• Testim 1%, gel, 50 mg/d (75)</li> </ul> Duration: 12 mo                                             | <ul style="list-style-type: none"> <li>• Erythrocytosis: zero in both groups</li> <li>• Prostate cancer: zero in both groups</li> <li>• WAE: zero in both groups</li> </ul>                                                                                                              |                                                                                                                                                                        |
| <b>Aversa 2012</b>     | Middle-aged men with LOH and MetS                                  | <ul style="list-style-type: none"> <li>• No treatment (20)</li> <li>• IM TU, 12 wk (40)</li> </ul> Duration: 36 mo                                                                     | <ul style="list-style-type: none"> <li>• MI: 1 in control group</li> <li>• Erythrocytosis: 4 in TU group</li> </ul>                                                                                                                                                                      |                                                                                                                                                                        |
| <b>Wang 2004</b>       | 19–68 yr                                                           | <ul style="list-style-type: none"> <li>• Gel 1%, 50 mg/d (NR)</li> <li>• Gel 1%, 75 mg/d (NR)</li> <li>• Gel 1%, 100 mg/d (NR)</li> </ul> Total: 163 men<br>Duration: 36 mo†           | <ul style="list-style-type: none"> <li>• Prostate cancer: 1 in 75 mg/d group, 2 in 100 mg/d group</li> <li>• Skin reactions: 12 men</li> </ul>                                                                                                                                           |                                                                                                                                                                        |

|                    |             |                                                                                                                                               |                                                                                                                                                                                                                                                          |                                                                                  |
|--------------------|-------------|-----------------------------------------------------------------------------------------------------------------------------------------------|----------------------------------------------------------------------------------------------------------------------------------------------------------------------------------------------------------------------------------------------------------|----------------------------------------------------------------------------------|
| <b>Hajjar 1997</b> | Elderly men | <ul style="list-style-type: none"> <li>• No treatment (27)</li> <li>• IM TE or TC 200mg/2-3 wk (45)</li> </ul> <p>Duration: at least 2 yr</p> | <ul style="list-style-type: none"> <li>• Myocardial infarction: 1 in TRT group</li> <li>• Stroke: No treatment: 1/23; TRT: 1/26</li> <li>• Diabetes: No treatment: 0/23; TRT: 1/26</li> <li>• Erythrocytosis¶: No treatment: 0/27; TRT: 11/45</li> </ul> | Safety outcomes were reported based on a subset of people assigned to each group |
|--------------------|-------------|-----------------------------------------------------------------------------------------------------------------------------------------------|----------------------------------------------------------------------------------------------------------------------------------------------------------------------------------------------------------------------------------------------------------|----------------------------------------------------------------------------------|

Note: AHR = adjusted hazard ratio, DPE = diet plus exercise, ED = erectile dysfunction, IHH = idiopathic hypogonadotropic hypogonadism, IM = intramuscular injection, LOH = late-onset hypogonadism, MetS = metabolic syndrome, MI = myocardial infarction, NR = not reported, SAE = serious adverse event, TC = testosterone cypionate, TE = testosterone enanthate, TU = testosterone undecanoate, TRT = testosterone replacement therapy, T = testosterone, VA = Veterans Affairs, WAE = withdrawal due to adverse events.

†Composite outcome of all-cause mortality, myocardial infarction, and ischemic stroke. MI, stroke and CV death were also reported separately; however the length of observation time differed between groups.

‡ This study was completed after an initial 6-month randomized study for an additional 36 months; participants had a total of 42 months of gel exposure.

¶ Reported as polycythemia for the treatment group. Zero count inferred for the control group.
